# Supplementary material
Source: PubMed Central journal article supplement (PMC4817619)
Supplement: ismej201423x1.pdf [file ismej201423x1.pdf]

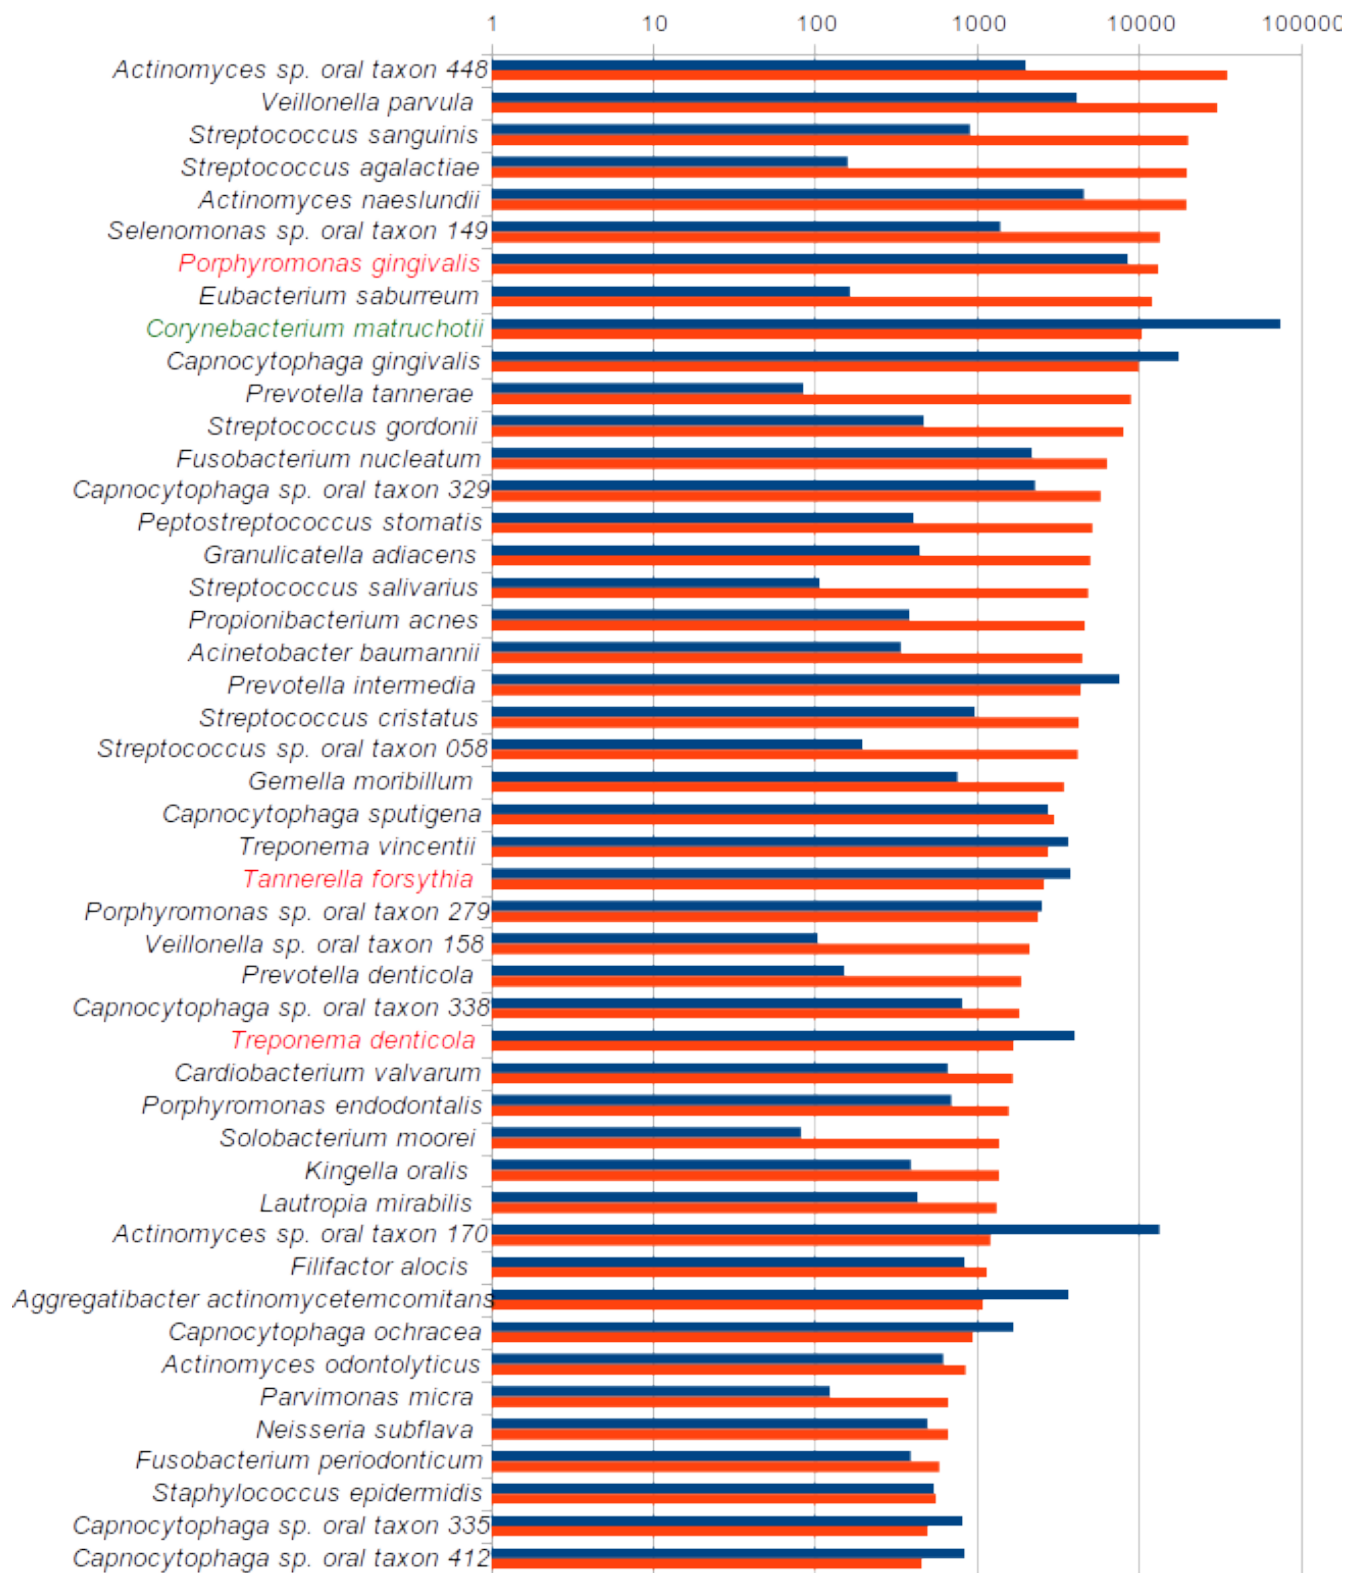

**Supplementary Figure 1.** Phylogenetic assignment of expression levels of differentially expressed genes in the non-pooled versus pooled samples after TMM normalization. In red pooled samples in blue non-pooled samples (see Material and Methods).
