# Supplementary material
Source: PubMed Central journal article supplement (PMC4817619)
Supplement: ismej201423x2.pdf [file ismej201423x2.pdf]

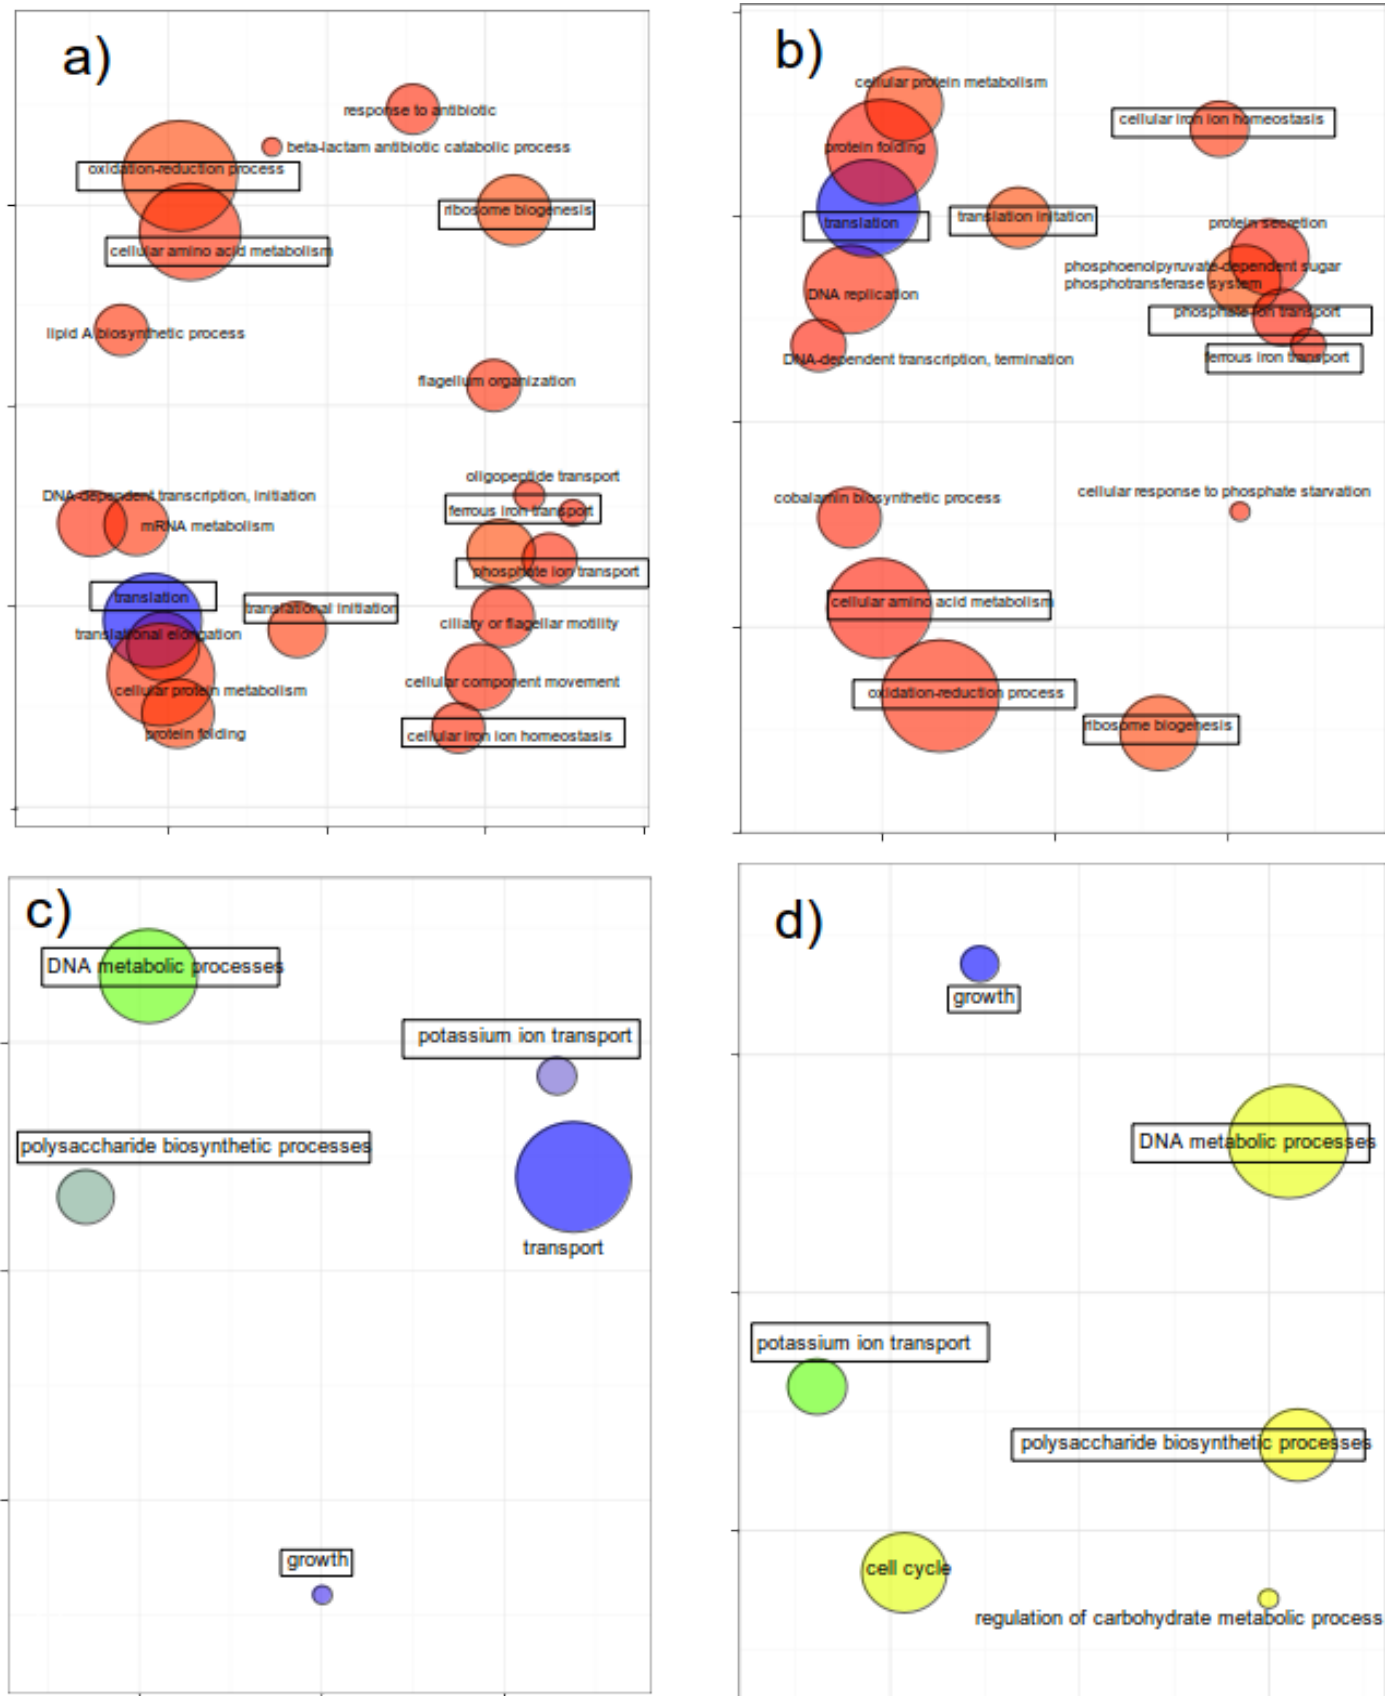

**Supplementary Figure 2.** Comparison of GO enrichment results in pooled and non-pooled samples a) Summarized over-represented GO terms related to biological processes in pooled samples; b) Summarized over-represented GO terms related to biological processes in non-pooled samples; c) Summarized under-represented GO terms related to biological processes in pooled samples and d) Summarized under-represented GO terms related to biological processes in non-pooled samples.
