# Supplementary material
Source: PubMed Central journal article supplement (PMC4817619)
Supplement: ismej201423x5.pdf [file ismej201423x5.pdf]

Supplementary Table S3. Results of mapping simulated reads against the genomes database. 200,000 simulated reads obtained using 'wgsim' simulator were mapped against the genomes in our database (see Supplementary Table S1). Using wgsim\_eval.pl we calculated the percentage of reads mapped correctly.

|                    | <b>bowtie2</b> | <b>stampy</b> | <b>bowtie</b> | <b>gassst</b> | <b>bwa</b> | <b>smalt</b> | <b>ssaha2</b> |
|--------------------|----------------|---------------|---------------|---------------|------------|--------------|---------------|
| <b>Single read</b> | <b>98.2</b>    | 95.5          | 100           | 64.8          | 65.4       | 66.4         | 100           |
| <b>Paired-end</b>  | <b>96.9</b>    | 93.4          | 0.23          | -             | 65.8       | 62.3         | 56.1          |
