# Supplementary material
Source: PubMed Central journal article supplement (PMC4817619)
Supplement: ismej201423x9.pdf [file ismej201423x9.pdf]

Supplementary Table S7. Up-regulated putative virulence factors of the 'red-complex' in disease. These virulence factors were identified bibliographically or by BLAST alignment to the VFDB as described in the methods section. In red are proteins with potential protease or peptidase activities. In green are proteins probably involved in iron metabolism.

| Organism             | ORF ID               | Annotation in PATRIC                                                              | Homolog in VFDB database                                                                                                         |
|----------------------|----------------------|-----------------------------------------------------------------------------------|----------------------------------------------------------------------------------------------------------------------------------|
| <i>P. gingivalis</i> | VBIPorGin134034_0009 | ATP-dependent Clp protease ATP-binding subunit ClpA                               | chaperone [ <i>Pseudomonas fluorescens</i> str. SBW25]                                                                           |
| <i>P. gingivalis</i> | VBIPorGin134034_0042 | Phosphatidate cytidyltransferase EC 2.7.7.41                                      | phosphatidate cytidyltransferase [ <i>Enterococcus faecalis</i> str. V583]                                                       |
| <i>P. gingivalis</i> | VBIPorGin134034_0063 | Acyl-acyl-carrier-protein--UDP-N-acetylglucosamine O-acyltransferase EC 2.3.1.129 | UDP-N-acetylglucosamine acyltransferase [ <i>Haemophilus ducreyi</i> str. 35000HP]                                               |
| <i>P. gingivalis</i> | VBIPorGin134034_0065 | UDP-3-O-3-hydroxymyristoyl glucosamine N-acyltransferase EC 2.3.1.-               | UDP-3-O-[3-hydroxymyristoyl] glucosamine N-acyltransferase [ <i>Haemophilus influenzae</i> str. PittGG (nontypeable)]            |
| <i>P. gingivalis</i> | VBIPorGin134034_0078 | Arabinose 5-phosphate isomerase EC 5.3.1.13                                       | arabinose-5-phosphate isomerase [ <i>Campylobacter jejuni</i> str. 269.97 (subsp. doylei)]                                       |
| <i>P. gingivalis</i> | VBIPorGin134034_0107 | Probable UDP-N-acetyl-D-mannosaminuronic acid transferase EC 2.4.1.-              | UDP-N-acetyl-D-mannosamine transferase [ <i>Streptococcus pneumoniae</i> str. Hungary19A-6 (serotype 19A)]                       |
| <i>P. gingivalis</i> | VBIPorGin134034_0108 | UDP-N-acetylglucosamine 2-epimerase EC 5.1.3.14                                   | UDP-N-acetylglucosamine 2-epimerase [ <i>Vibrio vulnificus</i> str. YJ016 chromosome I]                                          |
| <i>P. gingivalis</i> | VBIPorGin134034_0178 | Undecaprenyl pyrophosphate synthetase EC 2.5.1.31                                 | undecaprenyl diphosphate synthase [ <i>Enterococcus faecalis</i> str. V583]                                                      |
| <i>P. gingivalis</i> | VBIPorGin134034_0250 | Hemolysins and related proteins containing CBS domains                            | CBS transporter associated domain protein [ <i>Clostridium perfringens</i> str. ATCC 13124]                                      |
| <i>P. gingivalis</i> | VBIPorGin134034_0287 | Glycosyl transferase                                                              | putative bactoprenol glucosyl transferase [ <i>Shigella flexneri</i> str. 301 (serotype 2a)]                                     |
| <i>P. gingivalis</i> | VBIPorGin134034_0320 | UDP-glucose 4-epimerase EC 5.1.3.2                                                | UDP-glucose-4-epimerase [ <i>Haemophilus ducreyi</i> str. 35000HP]                                                               |
| <i>P. gingivalis</i> | VBIPorGin134034_0323 | FIG00936311 hypothetical protein                                                  | hypothetical protein [ <i>Listeria monocytogenes</i> str. EGD-e (serovar 12a)]                                                   |
| <i>P. gingivalis</i> | VBIPorGin134034_0323 | FIG00936311 hypothetical protein                                                  | hypothetical protein [ <i>Listeria monocytogenes</i> str. EGD-e (serovar 12a)]                                                   |
| <i>P. gingivalis</i> | VBIPorGin134034_0323 | FIG00936311 hypothetical protein                                                  | hypothetical protein [ <i>Listeria monocytogenes</i> str. EGD-e (serovar 12a)]                                                   |
| <i>P. gingivalis</i> | VBIPorGin134034_0398 | Tyrosine-protein kinase Wzc EC 2.7.10.2                                           | chain length regulator (capsular polysaccharide biosynthesis) [ <i>Vibrio fischeri</i> str. ES114 chromosome I]                  |
| <i>P. gingivalis</i> | VBIPorGin134034_0411 | Hemolysins and related proteins containing CBS domains                            | CBS transporter associated domain protein [ <i>Clostridium perfringens</i> str. ATCC 13124]                                      |
| <i>P. gingivalis</i> | VBIPorGin134034_0471 | Protein export cytoplasm protein SecA ATPase RNA helicase TC 3.A.5.1.1            | ATPase SecA2 [ <i>Mycobacterium avium</i> str. 104]                                                                              |
| <i>P. gingivalis</i> | VBIPorGin134034_0471 | Protein export cytoplasm protein SecA ATPase RNA helicase TC 3.A.5.1.1            | ATPase SecA2 [ <i>Mycobacterium avium</i> str. 104]                                                                              |
| <i>P. gingivalis</i> | VBIPorGin134034_0542 | HtrA protease chaperone protein                                                   | serine protease MucD precursor [ <i>Pseudomonas aeruginosa</i> str. PAO1]                                                        |
| <i>P. gingivalis</i> | VBIPorGin134034_0543 | RNA polymerase sigma factor RpoD                                                  | RNA polymerase sigma factor RpoS [ <i>Legionella pneumophila</i> str. Paris]                                                     |
| <i>P. gingivalis</i> | VBIPorGin134034_0562 | Alkyl hydroperoxide reductase protein C EC 1.6.4.-                                | alkylhydroperoxide reductase [ <i>Mycobacterium intracellulare</i> str. MOTT36Y]                                                 |
| <i>P. gingivalis</i> | VBIPorGin134034_0589 | iron compound ABC transporter 2C ATP-binding protein                              | ABC transporter [ <i>Pseudomonas syringae</i> str. B728a (pv. syringae)]                                                         |
| <i>P. gingivalis</i> | VBIPorGin134034_0616 | Vitamin B12 ABC transporter 2C permease component BtuC                            | cobalaminFe3+-siderophores transport systems permease component [ <i>Corynebacterium glutamicum</i> str. ATCC 13032 (Bielefeld)] |
| <i>P. gingivalis</i> | VBIPorGin134034_0632 | Succinate-semialdehyde dehydrogenase 2C CoA-dependent                             | hypothetical protein [ <i>Listeria innocua</i> str. Clip11262 (serovar 6a)]                                                      |
| <i>P. gingivalis</i> | VBIPorGin134034_0649 | FKBP-type peptidyl-prolyl cis-trans isomerase FkpA precursor EC 5.2.1.8           | macrophage infectivity potentiator [ <i>Legionella pneumophila</i> str. Paris]                                                   |
| <i>P. gingivalis</i> | VBIPorGin134034_0651 | FKBP-type peptidyl-prolyl cis-trans isomerase FkIB EC 5.2.1.8                     | macrophage infectivity potentiator [ <i>Legionella pneumophila</i> str. Lens]                                                    |
| <i>P. gingivalis</i> | VBIPorGin134034_0685 | Two-component system response regulator                                           | putative two-component system response regulator [ <i>Pseudomonas fluorescens</i> str. SBW25]                                    |
| <i>P. gingivalis</i> | VBIPorGin134034_0687 | Glycosyl transferase 2C group 2 family protein                                    | glycosyl transferase family 2 [ <i>Yersinia pseudotuberculosis</i> str. YPIII (serotype O:3)]                                    |
| <i>P. gingivalis</i> | VBIPorGin134034_0904 | Phosphoribosylaminoimidazole-succinocarboxamide synthase EC 6.3.2.6               | phosphoribosylaminoimidazole-succinocarboxamide synthase [ <i>Mycobacterium smegmatis</i> str. MC2 155]                          |
| <i>P. gingivalis</i> | VBIPorGin134034_0954 | ABC transporter 2C ATP-binding protein                                            | Fe(3+) ions import ATP-binding protein fbpC [ <i>Neisseria gonorrhoeae</i> str. NCCP11945]                                       |
| <i>P. gingivalis</i> | VBIPorGin134034_1006 | Transcriptional regulatory protein rprY                                           | putative two-component response regulator [ <i>Mycobacterium leprae</i> str. TN]                                                 |

Supplementary Table S7. Up-regulated putative virulence factors of the 'red-complex' in disease. These virulence factors were identified bibliographically or by BLAST alignment to the VFDB as described in the methods section. In red are proteins with potential protease or peptidase activities. In green are proteins probably involved in iron metabolism.

|                      |                      |                                                              |                                                                                                                                                  |
|----------------------|----------------------|--------------------------------------------------------------|--------------------------------------------------------------------------------------------------------------------------------------------------|
| <i>P. gingivalis</i> | VBIPorGin134034_1037 | ClpB protein                                                 | putative ClpAB-type chaperone [Pseudomonas aeruginosa str. UCBPP-PA14]                                                                           |
| <i>P. gingivalis</i> | VBIPorGin134034_1053 | bacterial sugar transferase                                  | putative capsular polysaccharide biosynthesis glycosyltransferase [Vibrio cholerae str. O395 chromosome II]                                      |
| <i>P. gingivalis</i> | VBIPorGin134034_1056 | pigmentation and extracellular proteinase regulator          | probable aminotransferase WbpE [Pseudomonas aeruginosa str. PAO1]                                                                                |
| <i>P. gingivalis</i> | VBIPorGin134034_1061 | UDP-glucose dehydrogenase EC 1.1.1.22                        | UDP-glucose 6-dehydrogenase [Bacillus thuringiensis str. Al Hakam]                                                                               |
| <i>P. gingivalis</i> | VBIPorGin134034_1066 | Glycosyl transferase 2C family 2                             | WbcM protein [Yersinia enterocolitica str. 105.5R(r) (subsp. palearctica)]                                                                       |
| <i>P. gingivalis</i> | VBIPorGin134034_1091 | ABC transporter 2C ATP-binding protein 2C putative           | ABC transporter ATP-binding permease protein [Pseudomonas syringae str. 1448A (pv. phaseolicola)]                                                |
| <i>P. gingivalis</i> | VBIPorGin134034_1092 | ABC transporter ATP-binding protein                          | lipoprotein inner membrane ABC-transporter [Yersinia pestis str. Pestoides F]                                                                    |
| <i>P. gingivalis</i> | VBIPorGin134034_1099 | Probable polybeta-D-mannuronate O-acetylase EC 2.3.1.-       | membrane bound O-acyl transferase MBOAT family protein [Pseudomonas putida str. W619]                                                            |
| <i>P. gingivalis</i> | VBIPorGin134034_1107 | 8-amino-7-oxononanoate synthase EC 2.3.1.47                  | hypothetical protein [Vibrio cholerae str. N16961 (O1 biovar eltor) chromosome II]                                                               |
| <i>P. gingivalis</i> | VBIPorGin134034_1151 | 3-oxoacyl-acyl-carrier protein reductase EC 1.1.1.100        | hypothetical protein [Streptococcus agalactiae str. NEM316 (serotype III)]                                                                       |
| <i>P. gingivalis</i> | VBIPorGin134034_1178 | Ornithine aminotransferase EC 2.6.1.13                       | 2 4-diaminobutyrate 4-transaminase [Pseudomonas putida str. W619]                                                                                |
| <i>P. gingivalis</i> | VBIPorGin134034_1182 | UDP-glucose dehydrogenase EC 1.1.1.22                        | UDP-glucoseGDP-mannose dehydrogenase-like protein [Pseudomonas aeruginosa str. LESB58]                                                           |
| <i>P. gingivalis</i> | VBIPorGin134034_1192 | GDP-mannose 4 2C6 dehydratase EC 4.2.1.47                    | GDP-mannose 4 6-dehydratase [Brucella suis str. 1330 chromosome I]                                                                               |
| <i>P. gingivalis</i> | VBIPorGin134034_1196 | Ferrous iron transport protein B                             | ferrous iron transporter B [Legionella pneumophila str. Corby]                                                                                   |
| <i>P. gingivalis</i> | VBIPorGin134034_1278 | surface antigen 2C putative                                  | hypothetical protein [Listeria monocytogenes str. EGD-e (serovar 12a)]                                                                           |
| <i>P. gingivalis</i> | VBIPorGin134034_1278 | surface antigen 2C putative                                  | hypothetical protein [Listeria monocytogenes str. EGD-e (serovar 12a)]                                                                           |
| <i>P. gingivalis</i> | VBIPorGin134034_1435 | Manganese superoxide dismutase EC 1.15.1.1                   | [Mn] superoxide dismutase [Mycobacterium smegmatis str. MC2 155]                                                                                 |
| <i>P. gingivalis</i> | VBIPorGin134034_1437 | FIG00935712 hypothetical protein                             | streptococcal pyrogenic exotoxin B [Streptococcus pyogenes str. MGAS6180 (serotype M28)]                                                         |
| <i>P. gingivalis</i> | VBIPorGin134034_1446 | dTDP-glucose 4 2C6-dehydratase EC 4.2.1.46                   | dTDP-glucose 4 6-dehydratase [Vibrio fischeri str. ES114 chromosome I]                                                                           |
| <i>P. gingivalis</i> | VBIPorGin134034_1448 | dTDP-4-dehydrorhamnose 3 2C5-epimerase EC 5.1.3.13           | dTDP-6-deoxy-D-xylo-4-hexulose-3 5-epimerase [Vibrio vulnificus str. YJ016 chromosome I]                                                         |
| <i>P. gingivalis</i> | VBIPorGin134034_1449 | Glucose-1-phosphate thymidyltransferase EC 2.7.7.24          | D-glucose-1-phosphate thymidyltransferase [Vibrio vulnificus str. YJ016 chromosome I]                                                            |
| <i>P. gingivalis</i> | VBIPorGin134034_1527 | GTP pyrophosphokinase EC 2.7.6.5 2C pppGpp synthetase I      | GTP pyrophosphokinase RelA [Mycobacterium sp. str. JDM601]                                                                                       |
| <i>P. gingivalis</i> | VBIPorGin134034_1539 | ABC transporter ATP-binding protein YvcR                     | ABC transporter related [Haemophilus somnus str. 2336]                                                                                           |
| <i>P. gingivalis</i> | VBIPorGin134034_1569 | Lipoprotein releasing system ATP-binding protein LolD        | Fe(3+) ions import ATP-binding protein fbpC [Neisseria gonorrhoeae str. NCCP11945]                                                               |
| <i>P. gingivalis</i> | VBIPorGin134034_1591 | ABC transporter 2C ATP-binding protein 2C MsbA family        | fused lipid transporter subunits of ABC superfamily: membrane component ATP-binding component [Haemophilus influenzae str. PittEE (nontypeable)] |
| <i>P. gingivalis</i> | VBIPorGin134034_1631 | 3-oxoacyl-acyl-carrier-protein synthase 2C KASII EC 2.3.1.41 | 3-oxoacyl-[acyl-carrier-protein] synthase 2 [Mycobacterium smegmatis str. MC2 155]                                                               |
| <i>P. gingivalis</i> | VBIPorGin134034_1647 | 8-amino-7-oxononanoate synthase EC 2.3.1.47                  | hypothetical protein [Vibrio parahaemolyticus str. RIMD 2210633 chromosome II]                                                                   |
| <i>P. gingivalis</i> | VBIPorGin134034_1667 | V-type ATP synthase subunit A EC 3.6.3.14                    | type III secretion system ATPase [Vibrio parahaemolyticus str. RIMD 2210633 chromosome I]                                                        |
| <i>P. gingivalis</i> | VBIPorGin134034_1668 | V-type ATP synthase subunit B EC 3.6.3.14                    | type III secretion system ATP synthase [Yersinia pestis str. Pestoides F]                                                                        |
| <i>P. gingivalis</i> | VBIPorGin134034_1680 | 3-deoxy-manno-octulosonate cytidyltransferase EC 2.7.7.38    | 3-deoxy-D-manno-octulosonate cytidyltransferase [Haemophilus somnus str. 2336]                                                                   |
| <i>P. gingivalis</i> | VBIPorGin134034_1688 | Enolase EC 4.2.1.11                                          | enolase [Streptococcus gordonii str. Challis (substr. CH1)]                                                                                      |
| <i>P. gingivalis</i> | VBIPorGin134034_1822 | bacterial sugar transferase                                  | Sugar transferase involved in lipopolysaccharide synthesis [Vibrio vulnificus str. CMCP6 chromosome II]                                          |
| <i>P. gingivalis</i> | VBIPorGin134034_1863 | Phosphoglucomutase EC 5.4.2.2                                | probable phosphomannomutase [Haemophilus ducreyi str. 35000HP]                                                                                   |

Supplementary Table S7. Up-regulated putative virulence factors of the 'red-complex' in disease. These virulence factors were identified bibliographically or by BLAST alignment to the VFDB as described in the methods section. In red are proteins with potential protease or peptidase activities. In green are proteins probably involved in iron metabolism.

|                      |                      |                                                                                                                              |                                                                                                                            |
|----------------------|----------------------|------------------------------------------------------------------------------------------------------------------------------|----------------------------------------------------------------------------------------------------------------------------|
| <i>P. gingivalis</i> | VBIPorGin134034_1974 | oxidoreductase 2C Gfo Idh MocA family                                                                                        | probable oxidoreductase WpbB [ <i>Pseudomonas aeruginosa</i> str. PAO1]                                                    |
| <i>P. gingivalis</i> | VBIPorGin134034_1978 | NAD-dependent glyceraldehyde-3-phosphate dehydrogenase EC 1.2.1.12                                                           | glyceraldehyde-3-phosphate dehydrogenase [ <i>Streptococcus pneumoniae</i> str. TIGR4 (serotype 4)]                        |
| <i>P. gingivalis</i> | VBIPorGin134034_2041 | Diaminopimelate decarboxylase EC 4.1.1.20                                                                                    | diaminopimelate decarboxylase LysA [ <i>Mycobacterium</i> sp. str. JDM601]                                                 |
| <i>P. gingivalis</i> | VBIPorGin134034_2043 | Cell division transporter 2C ATP-binding protein FtsE TC 3.A.5.1.1                                                           | iron(III) ABC transporter ATP-binding protein [ <i>Haemophilus somnus</i> str. 129PT]                                      |
| <i>P. gingivalis</i> | VBIPorGin134034_2066 | Mannose-1-phosphate guanylyltransferase GDP EC 2.7.7.22                                                                      | Mannose-1-phosphate guanylyltransferase ManC protein [ <i>Yersinia enterocolitica</i> str. 105.5R(r) (subsp. palearctica)] |
| <i>P. gingivalis</i> | VBIPorGin195531_0002 | 2 2C3 2C4 2C5-tetrahydropyridine-2 2C6-dicarboxylate N-acetyltransferase EC 2.3.1.89                                         | probable acetyltransferase [ <i>Bordetella avium</i> str. 197N]                                                            |
| <i>P. gingivalis</i> | VBIPorGin195531_0013 | Two-component system response regulator                                                                                      | putative two-component system response regulator [ <i>Pseudomonas fluorescens</i> str. SBW25]                              |
| <i>P. gingivalis</i> | VBIPorGin195531_0037 | Phosphatidate cytidyltransferase EC 2.7.7.41                                                                                 | phosphatidate cytidyltransferase [ <i>Enterococcus faecalis</i> str. V583]                                                 |
| <i>P. gingivalis</i> | VBIPorGin195531_0041 | Cell division transporter 2C ATP-binding protein FtsE TC 3.A.5.1.1                                                           | ABC transporter related [ <i>Haemophilus somnus</i> str. 2336]                                                             |
| <i>P. gingivalis</i> | VBIPorGin195531_0043 | Diaminopimelate decarboxylase EC 4.1.1.20                                                                                    | diaminopimelate decarboxylase LysA [ <i>Mycobacterium</i> sp. str. JDM601]                                                 |
| <i>P. gingivalis</i> | VBIPorGin195531_0061 | Enolase EC 4.2.1.11                                                                                                          | enolase [ <i>Streptococcus gordonii</i> str. Challis (substr. CH1)]                                                        |
| <i>P. gingivalis</i> | VBIPorGin195531_0077 | GTP pyrophosphokinase EC 2.7.6.5 2C pppGpp synthetase II Guanosine-3' 2C5'-bisdiphosphate 3'-pyrophosphohydrolase EC 3.1.7.2 | GTP pyrophosphokinase RelA [ <i>Mycobacterium marinum</i> str. M]                                                          |
| <i>P. gingivalis</i> | VBIPorGin195531_0081 | V-type ATP synthase subunit B EC 3.6.3.14                                                                                    | type III secretion system ATP synthase [ <i>Yersinia pestis</i> str. Pestoides F]                                          |
| <i>P. gingivalis</i> | VBIPorGin195531_0082 | V-type ATP synthase subunit A EC 3.6.3.14                                                                                    | type III secretion system ATPase [ <i>Vibrio parahaemolyticus</i> str. RIMD 2210633 chromosome I]                          |
| <i>P. gingivalis</i> | VBIPorGin195531_0222 | bacterial sugar transferase                                                                                                  | Sugar transferase involved in lipopolysaccharide synthesis [ <i>Vibrio vulnificus</i> str. CMCP6 chromosome II]            |
| <i>P. gingivalis</i> | VBIPorGin195531_0260 | Phosphoglucomutase EC 5.4.2.2                                                                                                | probable phosphomannomutase [ <i>Haemophilus ducreyi</i> str. 35000HP]                                                     |
| <i>P. gingivalis</i> | VBIPorGin195531_0327 | Acyl-acyl-carrier-protein--UDP-N-acetylglucosamine O-acyltransferase EC 2.3.1.129                                            | UDP-N-acetylglucosamine acyltransferase [ <i>Haemophilus ducreyi</i> str. 35000HP]                                         |
| <i>P. gingivalis</i> | VBIPorGin195531_0329 | UDP-3-O-3-hydroxymyristoyl glucosamine N-acyltransferase EC 2.3.1.-                                                          | UDP-3-O-[3-hydroxymyristoyl] glucosamine N-acyltransferase [ <i>Haemophilus influenzae</i> str. PittGG (nontypeable)]      |
| <i>P. gingivalis</i> | VBIPorGin195531_0343 | Arabinose 5-phosphate isomerase EC 5.3.1.13                                                                                  | arabinose-5-phosphate isomerase [ <i>Campylobacter jejuni</i> str. 269.97 (subsp. doylei)]                                 |
| <i>P. gingivalis</i> | VBIPorGin195531_0367 | UDP-N-acetyl-D-mannosamine dehydrogenase EC 1.1.1.-                                                                          | UDP-N-acetyl-D-mannosaminuronate dehydrogenase [ <i>Vibrio vulnificus</i> str. CMCP6 chromosome I]                         |
| <i>P. gingivalis</i> | VBIPorGin195531_0369 | probable glycosyltransferase                                                                                                 | Glycosyltransferase [ <i>Bacillus cereus</i> str. ATCC 14579]                                                              |
| <i>P. gingivalis</i> | VBIPorGin195531_0377 | Dolichol-phosphate mannosyltransferase EC 2.4.1.83 in lipid-linked oligosaccharide synthesis cluster                         | Glycosyltransferase involved in cell wall biogenesis [ <i>Streptococcus thermophilus</i> str. LMD-9 (nonpathogenic)]       |
| <i>P. gingivalis</i> | VBIPorGin195531_0379 | UDP-N-acetylglucosamine 2-epimerase EC 5.1.3.14                                                                              | UDP-N-acetylglucosamine 2-epimerase [ <i>Vibrio vulnificus</i> str. YJ016 chromosome I]                                    |
| <i>P. gingivalis</i> | VBIPorGin195531_0386 | Ferrochelatase 2C protoheme ferro-lyase EC 4.99.1.1                                                                          | ferrochelatase [ <i>Haemophilus influenzae</i> str. Rd KW20 (serotype d)]                                                  |
| <i>P. gingivalis</i> | VBIPorGin195531_0397 | Malonyl CoA-acyl carrier protein transacylase EC 2.3.1.39                                                                    | Type I modular polyketide synthase [ <i>Mycobacterium ulcerans</i> str. Agy99 plasmid pMUM001]                             |
| <i>P. gingivalis</i> | VBIPorGin195531_0397 | Malonyl CoA-acyl carrier protein transacylase EC 2.3.1.39                                                                    | Type I modular polyketide synthase [ <i>Mycobacterium ulcerans</i> str. Agy99 plasmid pMUM001]                             |
| <i>P. gingivalis</i> | VBIPorGin195531_0397 | Malonyl CoA-acyl carrier protein transacylase EC 2.3.1.39                                                                    | Type I modular polyketide synthase [ <i>Mycobacterium ulcerans</i> str. Agy99 plasmid pMUM001]                             |
| <i>P. gingivalis</i> | VBIPorGin195531_0397 | Malonyl CoA-acyl carrier protein transacylase EC 2.3.1.39                                                                    | Type I modular polyketide synthase [ <i>Mycobacterium ulcerans</i> str. Agy99 plasmid pMUM001]                             |
| <i>P. gingivalis</i> | VBIPorGin195531_0445 | Undecaprenyl pyrophosphate synthetase EC 2.5.1.31                                                                            | undecaprenyl diphosphate synthase [ <i>Enterococcus faecalis</i> str. V583]                                                |
| <i>P. gingivalis</i> | VBIPorGin195531_0524 | Hemolysins and related proteins containing CBS domains                                                                       | CBS transporter associated domain protein [ <i>Clostridium perfringens</i> str. ATCC 13124]                                |
| <i>P. gingivalis</i> | VBIPorGin195531_0530 | 2-Keto-3-deoxy-D-manno-octulosonate-8-phosphate synthase EC 2.5.1.55                                                         | 2-dehydro-3-deoxyphosphooctonate aldolase [ <i>Haemophilus ducreyi</i> str. 35000HP]                                       |

Supplementary Table S7. Up-regulated putative virulence factors of the 'red-complex' in disease. These virulence factors were identified bibliographically or by BLAST alignment to the VFDB as described in the methods section. In red are proteins with potential protease or peptidase activities. In green are proteins probably involved in iron metabolism.

|                      |                      |                                                                        |                                                                                                           |
|----------------------|----------------------|------------------------------------------------------------------------|-----------------------------------------------------------------------------------------------------------|
| <i>P. gingivalis</i> | VBIPorGin195531_0580 | Lipoprotein releasing system ATP-binding protein LolD                  | Fe(3+) ions import ATP-binding protein fbpC [ <i>Neisseria gonorrhoeae</i> str. NCCP11945]                |
| <i>P. gingivalis</i> | VBIPorGin195531_0627 | GTP pyrophosphokinase EC 2.7.6.5 2C pppGpp synthetase I                | GTP pyrophosphokinase RelA [ <i>Mycobacterium</i> sp. str. JDM601]                                        |
| <i>P. gingivalis</i> | VBIPorGin195531_0708 | 3-deoxy-D-manno-octulosonic-acid transferase EC 2.-.-.-                | Three-deoxy-D-manno-octulosonic-acid transferase domain protein [ <i>Haemophilus somnus</i> str. 2336]    |
| <i>P. gingivalis</i> | VBIPorGin195531_0710 | Glucose-1-phosphate thymidyltransferase EC 2.7.7.24                    | D-glucose-1-phosphate thymidyltransferase [ <i>Vibrio vulnificus</i> str. YJ016 chromosome I]             |
| <i>P. gingivalis</i> | VBIPorGin195531_0711 | dTDP-4-dehydrothamnose 3 2C5-epimerase EC 5.1.3.13                     | dTDP-6-deoxy-D-xylo-4-hexulose-3 5-epimerase [ <i>Vibrio vulnificus</i> str. YJ016 chromosome I]          |
| <i>P. gingivalis</i> | VBIPorGin195531_0724 | FIG00935712 hypothetical protein                                       | Streptopain precursor [ <i>Streptococcus pyogenes</i> str. MGAS10750 (serotype M4)]                       |
| <i>P. gingivalis</i> | VBIPorGin195531_0728 | Manganese superoxide dismutase EC 1.15.1.1                             | [Mn] superoxide dismutase [ <i>Mycobacterium smegmatis</i> str. MC2 155]                                  |
| <i>P. gingivalis</i> | VBIPorGin195531_0864 | Phosphoribosylaminoimidazole-succinocarboxamide synthase EC 6.3.2.6    | phosphoribosylaminoimidazole-succinocarboxamide synthase [ <i>Mycobacterium smegmatis</i> str. MC2 155]   |
| <i>P. gingivalis</i> | VBIPorGin195531_0919 | ABC transporter 2C ATP-binding protein                                 | Fe(3+) ions import ATP-binding protein fbpC [ <i>Neisseria gonorrhoeae</i> str. NCCP11945]                |
| <i>P. gingivalis</i> | VBIPorGin195531_0929 | Ferrous iron transport protein B                                       | ferrous iron transporter B [ <i>Legionella pneumophila</i> str. Corby]                                    |
| <i>P. gingivalis</i> | VBIPorGin195531_1015 | Glycosyl transferase 2C family 2                                       | WbcM protein [ <i>Yersinia enterocolitica</i> str. 105.5R(r) (subsp. palearctica)]                        |
| <i>P. gingivalis</i> | VBIPorGin195531_1027 | UDP-glucose dehydrogenase EC 1.1.1.22                                  | UDP-glucose 6-dehydrogenase [ <i>Bacillus thuringiensis</i> str. Al Hakam]                                |
| <i>P. gingivalis</i> | VBIPorGin195531_1071 | Phosphomannomutase EC 5.4.2.8<br>Phosphoglucosamine mutase EC 5.4.2.10 | phosphomannomutase [ <i>Pseudomonas putida</i> str. KT2440]                                               |
| <i>P. gingivalis</i> | VBIPorGin195531_1076 | Transcriptional regulatory protein rprY                                | putative two-component response regulator [ <i>Mycobacterium leprae</i> str. TN]                          |
| <i>P. gingivalis</i> | VBIPorGin195531_1111 | ABC transporter 2C ATP-binding protein 2C putative                     | ABC transporter ATP-binding permease protein [ <i>Pseudomonas syringae</i> str. 1448A (pv. phaseolicola)] |
| <i>P. gingivalis</i> | VBIPorGin195531_1112 | ABC transporter ATP-binding protein                                    | lipoprotein inner membrane ABC-transporter [ <i>Yersinia pestis</i> str. CO92 (biovar Orientalis)]        |
| <i>P. gingivalis</i> | VBIPorGin195531_1118 | Probable polybeta-D-mannuronate O-acetylase EC 2.3.1.-                 | membrane bound O-acyl transferase MBOAT family protein [ <i>Pseudomonas putida</i> str. W619]             |
| <i>P. gingivalis</i> | VBIPorGin195531_1124 | 8-amino-7-oxononanoate synthase EC 2.3.1.47                            | hypothetical protein [ <i>Vibrio cholerae</i> str. N16961 (O1 biovar eltor) chromosome II]                |
| <i>P. gingivalis</i> | VBIPorGin195531_1162 | 3-oxoacyl-acyl-carrier protein reductase EC 1.1.1.100                  | hypothetical protein [ <i>Streptococcus agalactiae</i> str. NEM316 (serotype III)]                        |
| <i>P. gingivalis</i> | VBIPorGin195531_1214 | Lipid-A-disaccharide synthase EC 2.4.1.182                             | lipid-A-disaccharide synthase [ <i>Haemophilus somnus</i> str. 129PT]                                     |
| <i>P. gingivalis</i> | VBIPorGin195531_1253 | oxidoreductase 2C Gfo Idh MocA family                                  | probable oxidoreductase WpbB [ <i>Pseudomonas aeruginosa</i> str. PAO1]                                   |
| <i>P. gingivalis</i> | VBIPorGin195531_1309 | 8-amino-7-oxononanoate synthase EC 2.3.1.47                            | hypothetical protein [ <i>Vibrio parahaemolyticus</i> str. RIMD 2210633 chromosome II]                    |
| <i>P. gingivalis</i> | VBIPorGin195531_1325 | 3-oxoacyl-acyl-carrier-protein synthase 2C KASII EC 2.3.1.41           | 3-oxoacyl-[acyl-carrier-protein] synthase 2 [ <i>Mycobacterium smegmatis</i> str. MC2 155]                |
| <i>P. gingivalis</i> | VBIPorGin195531_1421 | FIG00936311 hypothetical protein                                       | hypothetical protein [ <i>Listeria monocytogenes</i> str. EGD-e (serovar 12a)]                            |
| <i>P. gingivalis</i> | VBIPorGin195531_1421 | FIG00936311 hypothetical protein                                       | hypothetical protein [ <i>Listeria monocytogenes</i> str. EGD-e (serovar 12a)]                            |
| <i>P. gingivalis</i> | VBIPorGin195531_1421 | FIG00936311 hypothetical protein                                       | hypothetical protein [ <i>Listeria monocytogenes</i> str. EGD-e (serovar 12a)]                            |
| <i>P. gingivalis</i> | VBIPorGin195531_1457 | Translation elongation factor Tu                                       | elongation factor Tu [ <i>Mycoplasma gallisepticum</i> str. R]                                            |
| <i>P. gingivalis</i> | VBIPorGin195531_1503 | Carbonic anhydrase EC 4.2.1.1                                          | putative carbonic anhydrase [ <i>Salmonella typhimurium</i> str. LT2 plasmid pSLT]                        |
| <i>P. gingivalis</i> | VBIPorGin195531_1528 | Hemolysins and related proteins containing CBS domains                 | CBStransporter associated domain protein [ <i>Clostridium perfringens</i> str. ATCC 13124]                |
| <i>P. gingivalis</i> | VBIPorGin195531_1541 | Mannose-6-phosphate isomerase EC 5.3.1.8                               | mannose-6-phosphate isomerase [ <i>Bacillus thuringiensis</i> str. Al Hakam]                              |
| <i>P. gingivalis</i> | VBIPorGin195531_1587 | Protein export cytoplasm protein SecA ATPase RNA helicase TC 3.A.5.1.1 | ATPase SecA2 [ <i>Mycobacterium avium</i> str. 104]                                                       |
| <i>P. gingivalis</i> | VBIPorGin195531_1587 | Protein export cytoplasm protein SecA ATPase RNA helicase TC 3.A.5.1.1 | ATPase SecA2 [ <i>Mycobacterium avium</i> str. 104]                                                       |
| <i>P. gingivalis</i> | VBIPorGin195531_1656 | HtrA protease chaperone protein                                        | serine protease MucD precursor [ <i>Pseudomonas aeruginosa</i> str. PAO1]                                 |

Supplementary Table S7. Up-regulated putative virulence factors of the 'red-complex' in disease. These virulence factors were identified bibliographically or by BLAST alignment to the VFDB as described in the methods section. In red are proteins with potential protease or peptidase activities. In green are proteins probably involved in iron metabolism.

|                      |                      |                                                                         |                                                                                                                                     |
|----------------------|----------------------|-------------------------------------------------------------------------|-------------------------------------------------------------------------------------------------------------------------------------|
| <i>P. gingivalis</i> | VBIPorGin195531_1657 | RNA polymerase sigma factor RpoD                                        | RNA polymerase sigma factor RpoS [ <i>Legionella pneumophila</i> str. Paris]                                                        |
| <i>P. gingivalis</i> | VBIPorGin195531_1679 | Alkyl hydroperoxide reductase protein C EC 1.6.4.-                      | alkylhydroperoxide reductase [ <i>Mycobacterium intracellulare</i> str. MOTT36Y]                                                    |
| <i>P. gingivalis</i> | VBIPorGin195531_1700 | Tetraacyldisaccharide 4'-kinase EC 2.7.1.130                            | tetraacyldisaccharide 4-kinase [ <i>Haemophilus influenzae</i> str. Rd KW20 (serotype d)]                                           |
| <i>P. gingivalis</i> | VBIPorGin195531_1707 | iron compound ABC transporter 2C ATP-binding protein                    | ABC transporter [ <i>Pseudomonas syringae</i> str. B728a (pv. <i>syringae</i> )]                                                    |
| <i>P. gingivalis</i> | VBIPorGin195531_1708 | Vitamin B12 ABC transporter 2C permease component BtuC                  | iron ABC transporter permease [ <i>Corynebacterium pseudotuberculosis</i> str. FRC41]                                               |
| <i>P. gingivalis</i> | VBIPorGin195531_1733 | Vitamin B12 ABC transporter 2C permease component BtuC                  | cobalaminFe3+-siderophores transport systems permease component [ <i>Corynebacterium glutamicum</i> str. ATCC 13032 (Bielefeld)]    |
| <i>P. gingivalis</i> | VBIPorGin195531_1749 | Succinate-semialdehyde dehydrogenase 2C CoA-dependent                   | hypothetical protein [ <i>Listeria innocua</i> str. Clip11262 (serovar 6a)]                                                         |
| <i>P. gingivalis</i> | VBIPorGin195531_1769 | FKBP-type peptidyl-prolyl cis-trans isomerase FkpA precursor EC 5.2.1.8 | macrophage infectivity potentiator [ <i>Legionella pneumophila</i> str. Paris]                                                      |
| <i>P. gingivalis</i> | VBIPorGin195531_1771 | FKBP-type peptidyl-prolyl cis-trans isomerase FkIB EC 5.2.1.8           | macrophage infectivity potentiator [ <i>Legionella pneumophila</i> str. Lens]                                                       |
| <i>P. gingivalis</i> | VBIPorGin195531_1782 | DNA-binding response regulator                                          | two component transcriptional regulator winged helix family [ <i>Mycobacterium vanbaalenii</i> str. PYR-1]                          |
| <i>P. gingivalis</i> | VBIPorGin195531_1805 | Two-component system response regulator                                 | putative two-component system response regulator [ <i>Pseudomonas fluorescens</i> str. SBW25]                                       |
| <i>P. gingivalis</i> | VBIPorGin195531_1960 | FIG00935743 hypothetical protein                                        | streptococcal pyrogenic exotoxin B [ <i>Streptococcus pyogenes</i> str. MGAS6180 (serotype M28)]                                    |
| <i>P. gingivalis</i> | VBIPorGin195531_2015 | surface antigen 2C putative                                             | hypothetical protein [ <i>Listeria monocytogenes</i> str. EGD-e (serovar 12a)]                                                      |
| <i>P. gingivalis</i> | VBIPorGin195531_2015 | surface antigen 2C putative                                             | hypothetical protein [ <i>Listeria monocytogenes</i> str. EGD-e (serovar 12a)]                                                      |
| <i>P. gingivalis</i> | VBIPorGin195531_2098 | Ferrous iron transport protein B                                        | ferrous iron transporter B [ <i>Legionella pneumophila</i> str. Corby]                                                              |
| <i>P. gingivalis</i> | VBIPorGin195531_2104 | GDP-mannose 4 2C6 dehydratase EC 4.2.1.47                               | GDP-mannose 4 6-dehydratase [ <i>Brucella suis</i> str. 1330 chromosome I]                                                          |
| <i>P. gingivalis</i> | VBIPorGin195531_2114 | UDP-glucose dehydrogenase EC 1.1.1.22                                   | UDP-glucoseGDP-mannose dehydrogenase-like protein [ <i>Pseudomonas aeruginosa</i> str. LESB58]                                      |
| <i>P. gingivalis</i> | VBIPorGin195531_2118 | Ornithine aminotransferase EC 2.6.1.13                                  | diaminobutyrate--2-oxoglutarate aminotransferase [ <i>Pseudomonas fluorescens</i> str. Pf-5]                                        |
| <i>P. gingivalis</i> | VBIPorGin195531_2154 | Mannose-1-phosphate guanylyltransferase GDP EC 2.7.7.22                 | Mannose-1-phosphate guanylyltransferase ManC protein [ <i>Yersinia enterocolitica</i> str. 105.5R(r) (subsp. <i>palaearctica</i> )] |
| <i>P. gingivalis</i> | VBIPorGin239392_0023 | Hemolysins and related proteins containing CBS domains                  | CBS transporter associated domain protein [ <i>Clostridium perfringens</i> str. ATCC 13124]                                         |
| <i>P. gingivalis</i> | VBIPorGin239392_0081 | Ferrous iron transport protein B                                        | ferrous iron transporter B [ <i>Legionella pneumophila</i> str. Corby]                                                              |
| <i>P. gingivalis</i> | VBIPorGin239392_0091 | ABC transporter 2C ATP-binding protein                                  | Fe(3+) ions import ATP-binding protein fbpC [ <i>Neisseria gonorrhoeae</i> str. NCCP11945]                                          |
| <i>P. gingivalis</i> | VBIPorGin239392_0121 | Lipoprotein releasing system ATP-binding protein LolD                   | Fe(3+) ions import ATP-binding protein fbpC [ <i>Neisseria gonorrhoeae</i> str. NCCP11945]                                          |
| <i>P. gingivalis</i> | VBIPorGin239392_0155 | ABC transporter 2C ATP-binding protein 2C putative                      | ABC transporter ATP-bindingpermease protein [ <i>Pseudomonas syringae</i> str. 1448A (pv. <i>phaseolicola</i> )]                    |
| <i>P. gingivalis</i> | VBIPorGin239392_0156 | ABC transporter ATP-binding protein                                     | lipoprotein inner membrane ABC-transporter [ <i>Yersinia pestis</i> str. Pestoides F]                                               |
| <i>P. gingivalis</i> | VBIPorGin239392_0183 | Phosphatidate cytidyltransferase EC 2.7.7.41                            | phosphatidate cytidyltransferase [ <i>Enterococcus faecalis</i> str. V583]                                                          |
| <i>P. gingivalis</i> | VBIPorGin239392_0191 | Glycosyl transferase 2C group 2 family protein                          | glycosyl transferase family 2 [ <i>Yersinia pseudotuberculosis</i> str. YPIII (serotype O:3)]                                       |
| <i>P. gingivalis</i> | VBIPorGin239392_0231 | FKBP-type peptidyl-prolyl cis-trans isomerase FkIB EC 5.2.1.8           | macrophage infectivity potentiator [ <i>Legionella pneumophila</i> str. Lens]                                                       |
| <i>P. gingivalis</i> | VBIPorGin239392_0234 | FKBP-type peptidyl-prolyl cis-trans isomerase FkpA precursor EC 5.2.1.8 | macrophage infectivity potentiator [ <i>Legionella pneumophila</i> str. Paris]                                                      |
| <i>P. gingivalis</i> | VBIPorGin239392_0254 | Succinate-semialdehyde dehydrogenase 2C CoA-dependent                   | hypothetical protein [ <i>Listeria innocua</i> str. Clip11262 (serovar 6a)]                                                         |
| <i>P. gingivalis</i> | VBIPorGin239392_0270 | Vitamin B12 ABC transporter 2C permease component BtuC                  | cobalaminFe3+-siderophores transport systems permease component [ <i>Corynebacterium glutamicum</i> str. ATCC 13032 (Bielefeld)]    |
| <i>P. gingivalis</i> | VBIPorGin239392_0295 | Vitamin B12 ABC transporter 2C permease component BtuC                  | iron ABC transporter permease [ <i>Corynebacterium pseudotuberculosis</i> str. FRC41]                                               |

Supplementary Table S7. Up-regulated putative virulence factors of the 'red-complex' in disease. These virulence factors were identified bibliographically or by BLAST alignment to the VFDB as described in the methods section. In red are proteins with potential protease or peptidase activities. In green are proteins probably involved in iron metabolism.

|                      |                      |                                                                                                                                    |                                                                                                                                                 |
|----------------------|----------------------|------------------------------------------------------------------------------------------------------------------------------------|-------------------------------------------------------------------------------------------------------------------------------------------------|
| <i>P. gingivalis</i> | VBIPorGin239392_0319 | UDP-glucose dehydrogenase EC 1.1.1.22                                                                                              | UDP-glucose 6-dehydrogenase [Bacillus thuringiensis str. Al Hakam]                                                                              |
| <i>P. gingivalis</i> | VBIPorGin239392_0327 | bacterial sugar transferase                                                                                                        | putative capsular polysaccharide biosynthesis glycosyltransferase [Vibrio cholerae str. O395 chromosome II]                                     |
| <i>P. gingivalis</i> | VBIPorGin239392_0343 | ClpB protein                                                                                                                       | putative ClpAB-type chaperone [Pseudomonas aeruginosa str. UCBPP-PA14]                                                                          |
| <i>P. gingivalis</i> | VBIPorGin239392_0375 | Transcriptional regulatory protein rprY                                                                                            | putative two-component response regulator [Mycobacterium leprae str. TN]                                                                        |
| <i>P. gingivalis</i> | VBIPorGin239392_0409 | oxidoreductase 2C Gfo Idh MocA family                                                                                              | probable oxidoreductase WpbB [Pseudomonas aeruginosa str. PAO1]                                                                                 |
| <i>P. gingivalis</i> | VBIPorGin239392_0414 | NAD-dependent glyceraldehyde-3-phosphate dehydrogenase EC 1.2.1.12                                                                 | glyceraldehyde-3-phosphate dehydrogenase [Streptococcus pneumoniae str. TIGR4 (serotype 4)]                                                     |
| <i>P. gingivalis</i> | VBIPorGin239392_0427 | 8-amino-7-oxononanoate synthase EC 2.3.1.47                                                                                        | hypothetical protein [Vibrio parahaemolyticus str. RIMD 2210633 chromosome II]                                                                  |
| <i>P. gingivalis</i> | VBIPorGin239392_0577 | FIG00936311 hypothetical protein                                                                                                   | hypothetical protein [Listeria monocytogenes str. EGD-e (serovar 12a)]                                                                          |
| <i>P. gingivalis</i> | VBIPorGin239392_0577 | FIG00936311 hypothetical protein                                                                                                   | hypothetical protein [Listeria monocytogenes str. EGD-e (serovar 12a)]                                                                          |
| <i>P. gingivalis</i> | VBIPorGin239392_0577 | FIG00936311 hypothetical protein                                                                                                   | hypothetical protein [Listeria monocytogenes str. EGD-e (serovar 12a)]                                                                          |
| <i>P. gingivalis</i> | VBIPorGin239392_0580 | UDP-glucose 4-epimerase EC 5.1.3.2                                                                                                 | UDP-glucose-4-epimerase [Haemophilus ducreyi str. 35000HP]                                                                                      |
| <i>P. gingivalis</i> | VBIPorGin239392_0764 | UDP-3-O-3-hydroxymyristoyl glucosamine N-acyltransferase EC 2.3.1.-                                                                | UDP-3-O-[3-hydroxymyristoyl] glucosamine N-acyltransferase [Haemophilus influenzae str. PittGG (nontypeable)]                                   |
| <i>P. gingivalis</i> | VBIPorGin239392_0765 | N-acetylglucosamine deacetylase EC 3.5.1.-<br>3R-hydroxymyristoyl-acyl carrier protein dehydratase EC 4.2.1.-                      | UDP-3-O-acyl-GlcNAc deacetylase [Haemophilus ducreyi str. 35000HP]                                                                              |
| <i>P. gingivalis</i> | VBIPorGin239392_0766 | Acyl-acyl-carrier-protein--UDP-N-acetylglucosamine O-acyltransferase EC 2.3.1.129                                                  | UDP-N-acetylglucosamine acyltransferase [Haemophilus ducreyi str. 35000HP]                                                                      |
| <i>P. gingivalis</i> | VBIPorGin239392_0815 | UDP-glucose dehydrogenase EC 1.1.1.22                                                                                              | UDP-glucoseGDP-mannose dehydrogenase-like protein [Pseudomonas aeruginosa str. LESB58]                                                          |
| <i>P. gingivalis</i> | VBIPorGin239392_0826 | GDP-L-fucose synthetase EC 1.1.1.271                                                                                               | GDP-fucose synthetase [Campylobacter jejuni str. 269.97 (subsp. doylei)]                                                                        |
| <i>P. gingivalis</i> | VBIPorGin239392_0875 | Probable polybeta-D-mannuronate O-acetylase EC 2.3.1.-                                                                             | membrane bound O-acyl transferase MBOAT family protein [Pseudomonas putida str. W619]                                                           |
| <i>P. gingivalis</i> | VBIPorGin239392_0939 | Enolase EC 4.2.1.11                                                                                                                | enolase [Streptococcus gordonii str. Challis (substr. CH1)]                                                                                     |
| <i>P. gingivalis</i> | VBIPorGin239392_0956 | GTP pyrophosphokinase EC 2.7.6.5 2C<br>pppGpp synthetase II Guanosine-3'<br>2C5'-bisdiphosphate 3'-pyrophosphohydrolase EC 3.1.7.2 | GTP pyrophosphokinase RelA [Mycobacterium marinum str. M]                                                                                       |
| <i>P. gingivalis</i> | VBIPorGin239392_0960 | V-type ATP synthase subunit B EC 3.6.3.14                                                                                          | type III secretion system ATP synthase [Yersinia pestis str. Pestoides F]                                                                       |
| <i>P. gingivalis</i> | VBIPorGin239392_0961 | V-type ATP synthase subunit A EC 3.6.3.14                                                                                          | type III secretion system ATPase [Vibrio parahaemolyticus str. RIMD 2210633 chromosome I]                                                       |
| <i>P. gingivalis</i> | VBIPorGin239392_1056 | Glycosyl transferase                                                                                                               | putative bactoprenol glucosyl transferase [Shigella flexneri str. 301 (serotype 2a)]                                                            |
| <i>P. gingivalis</i> | VBIPorGin239392_1078 | Glycosyltransferase                                                                                                                | putative bactoprenol glucosyl transferase [Shigella flexneri str. 301 (serotype 2a)]                                                            |
| <i>P. gingivalis</i> | VBIPorGin239392_1141 | surface antigen 2C putative                                                                                                        | hypothetical protein [Listeria monocytogenes str. EGD-e (serovar 12a)]                                                                          |
| <i>P. gingivalis</i> | VBIPorGin239392_1141 | surface antigen 2C putative                                                                                                        | hypothetical protein [Listeria monocytogenes str. EGD-e (serovar 12a)]                                                                          |
| <i>P. gingivalis</i> | VBIPorGin239392_1219 | ABC transporter 2C ATP-binding protein                                                                                             | daunorubicin resistance ABC transporter ATPase subunit [Mycobacterium gilvum str. PYR-GCK]                                                      |
| <i>P. gingivalis</i> | VBIPorGin239392_1229 | 3-oxoacyl-acyl-carrier protein reductase EC 1.1.1.100                                                                              | hypothetical protein [Streptococcus agalactiae str. NEM316 (serotype III)]                                                                      |
| <i>P. gingivalis</i> | VBIPorGin239392_1298 | ABC transporter 2C ATP-binding protein 2C MsbA family                                                                              | fused lipid transporter subunits of ABC superfamily: membrane componentATP-binding component [Haemophilus influenzae str. PittEE (nontypeable)] |
| <i>P. gingivalis</i> | VBIPorGin239392_1319 | 2-Keto-3-deoxy-D-manno-octulosonate-8-phosphate synthase EC 2.5.1.55                                                               | 2-dehydro-3-deoxyphosphooctonate aldolase [Haemophilus ducreyi str. 35000HP]                                                                    |
| <i>P. gingivalis</i> | VBIPorGin239392_1326 | Hemolysins and related proteins containing CBS domains                                                                             | CBS transporter associated domain protein [Clostridium perfringens str. ATCC 13124]                                                             |
| <i>P. gingivalis</i> | VBIPorGin239392_1345 | Lipopolysaccharide ABC transporter 2C ATP-binding protein LptB                                                                     | ABC transporter related [Haemophilus somnus str. 2336]                                                                                          |

Supplementary Table S7. Up-regulated putative virulence factors of the 'red-complex' in disease. These virulence factors were identified bibliographically or by BLAST alignment to the VFDB as described in the methods section. In red are proteins with potential protease or peptidase activities. In green are proteins probably involved in iron metabolism.

|                      |                      |                                                                                      |                                                                                                            |
|----------------------|----------------------|--------------------------------------------------------------------------------------|------------------------------------------------------------------------------------------------------------|
| <i>P. gingivalis</i> | VBIPorGin239392_1357 | Alkyl hydroperoxide reductase protein C EC 1.6.4.-                                   | alkylhydroperoxide reductase [Mycobacterium intracellulare str. MOTT36Y]                                   |
| <i>P. gingivalis</i> | VBIPorGin239392_1372 | Lipid-A-disaccharide synthase EC 2.4.1.182                                           | lipid-A-disaccharide synthase [Haemophilus ducreyi str. 35000HP]                                           |
| <i>P. gingivalis</i> | VBIPorGin239392_1438 | 3-deoxy-D-manno-octulosonic-acid transferase EC 2.-.-.-                              | Three-deoxy-D-manno-octulosonic-acid transferase domain protein [Haemophilus somnus str. 2336]             |
| <i>P. gingivalis</i> | VBIPorGin239392_1440 | Glucose-1-phosphate thymidyltransferase EC 2.7.7.24                                  | D-glucose-1-phosphate thymidyltransferase [Vibrio vulnificus str. YJ016 chromosome I]                      |
| <i>P. gingivalis</i> | VBIPorGin239392_1443 | dTDP-glucose 4 2C6-dehydratase EC 4.2.1.46                                           | dTDP-glucose 4 6-dehydratase [Vibrio fischeri str. ES114 chromosome I]                                     |
| <i>P. gingivalis</i> | VBIPorGin239392_1454 | FIG00935712 hypothetical protein                                                     | streptococcal pyrogenic exotoxin B [Streptococcus pyogenes str. MGAS6180 (serotype M28)]                   |
| <i>P. gingivalis</i> | VBIPorGin239392_1573 | Undecaprenyl pyrophosphate synthetase EC 2.5.1.31                                    | undecaprenyl diphosphate synthase [Enterococcus faecalis str. V583]                                        |
| <i>P. gingivalis</i> | VBIPorGin239392_1603 | 2 2C3 2C4 2C5-tetrahydropyridine-2 2C6-dicarboxylate N-acetyltransferase EC 2.3.1.89 | probable acetyltransferase [Bordetella avium str. 197N]                                                    |
| <i>P. gingivalis</i> | VBIPorGin239392_1644 | bacterial sugar transferase                                                          | Sugar transferase involved in lipopolysaccharide synthesis [Vibrio vulnificus str. CMCP6 chromosome II]    |
| <i>P. gingivalis</i> | VBIPorGin239392_1690 | <b>HtrA protease chaperone protein</b>                                               | <b>serine protease MucD precursor [Pseudomonas aeruginosa str. PAO1]</b>                                   |
| <i>P. gingivalis</i> | VBIPorGin239392_1698 | Phosphoglucomutase EC 5.4.2.2                                                        | probable phosphomannomutase [Haemophilus ducreyi str. 35000HP]                                             |
| <i>P. gingivalis</i> | VBIPorGin239392_1734 | <b>Cell division transporter 2C ATP-binding protein FtsE TC 3.A.5.1.1</b>            | <b>iron(III) ABC transporter ATP-binding protein [Haemophilus somnus str. 129PT]</b>                       |
| <i>P. gingivalis</i> | VBIPorGin239392_1736 | Diaminopimelate decarboxylase EC 4.1.1.20                                            | diaminopimelate decarboxylase LysA [Mycobacterium sp. str. JDM601]                                         |
| <i>P. gingivalis</i> | VBIPorGin239392_1816 | 8-amino-7-oxononanoate synthase EC 2.3.1.47                                          | hypothetical protein [Vibrio cholerae str. N16961 (O1 biovar eltor) chromosome II]                         |
| <i>P. gingivalis</i> | VBIPorGin239392_1832 | Heat shock protein 60 family chaperone GroEL                                         | 60 kDa chaperonin (Protein Cpn60)(groEL protein)(Heat shock protein B). [Legionella pneumophila str. Lens] |
| <i>P. gingivalis</i> | VBIPorGin239392_1848 | Ornithine aminotransferase EC 2.6.1.13                                               | 2 4-diaminobutyrate 4-transaminase [Pseudomonas mendocina str. ymp]                                        |
| <i>P. gingivalis</i> | VBIPorGin239392_1936 | Probable UDP-N-acetyl-D-mannosaminuronic acid transferase EC 2.4.1.-                 | UDP-N-acetyl-D-mannosamine transferase [Streptococcus pneumoniae str. Hungary19A-6 (serotype 19A)]         |
| <i>P. gingivalis</i> | VBIPorGin239392_1937 | UDP-N-acetylglucosamine 2-epimerase EC 5.1.3.14                                      | UDP-N-acetylglucosamine 2-epimerase [Vibrio vulnificus str. YJ016 chromosome I]                            |
| <i>P. gingivalis</i> | VBIPorGin239392_1944 | <b>Ferrochelataze 2C protoheme ferro-lyase EC 4.99.1.1</b>                           | <b>ferrochelataze [Haemophilus influenzae str. PittEE (nontypeable)]</b>                                   |
| <i>P. gingivalis</i> | VBIPorGin239392_1955 | Malonyl CoA-acyl carrier protein transacylase EC 2.3.1.39                            | Type I modular polyketide synthase [Mycobacterium ulcerans str. Agy99 plasmid pMUM001]                     |
| <i>P. gingivalis</i> | VBIPorGin239392_1955 | Malonyl CoA-acyl carrier protein transacylase EC 2.3.1.39                            | Type I modular polyketide synthase [Mycobacterium ulcerans str. Agy99 plasmid pMUM001]                     |
| <i>P. gingivalis</i> | VBIPorGin239392_1955 | Malonyl CoA-acyl carrier protein transacylase EC 2.3.1.39                            | Type I modular polyketide synthase [Mycobacterium ulcerans str. Agy99 plasmid pMUM001]                     |
| <i>P. gingivalis</i> | VBIPorGin239392_1955 | Malonyl CoA-acyl carrier protein transacylase EC 2.3.1.39                            | Type I modular polyketide synthase [Mycobacterium ulcerans str. Agy99 plasmid pMUM001]                     |
| <i>P. gingivalis</i> | VBIPorGin239392_1965 | Transcriptional regulator                                                            | FlrA; sigma-54-dependent transcriptional activator [Vibrio fischeri str. ES114 chromosome I]               |
| <i>P. gingivalis</i> | VBIPorGin239392_2009 | Phosphoribosylaminoimidazole-succinocarboxamide synthase EC 6.3.2.6                  | phosphoribosylaminoimidazole-succinocarboxamide synthase [Mycobacterium smegmatis str. MC2 155]            |
| <i>P. gingivalis</i> | VBIPorGin239392_2041 | GTP pyrophosphokinase EC 2.7.6.5 2C pppGpp synthetase I                              | GTP pyrophosphokinase RelA [Mycobacterium sp. str. JDM601]                                                 |
| <i>P. gingivalis</i> | VBIPorGin26334_0007  | <b>ATP-dependent Clp protease ATP-binding subunit ClpA</b>                           | <b>chaperone [Pseudomonas fluorescens str. SBW25]</b>                                                      |
| <i>P. gingivalis</i> | VBIPorGin26334_0012  | Two-component system response regulator                                              | putative two-component system response regulator [Pseudomonas fluorescens str. SBW25]                      |
| <i>P. gingivalis</i> | VBIPorGin26334_0037  | Phosphatidate cytidyltransferase EC 2.7.7.41                                         | phosphatidate cytidyltransferase [Enterococcus faecalis str. V583]                                         |
| <i>P. gingivalis</i> | VBIPorGin26334_0090  | Cell division transporter 2C ATP-binding protein FtsE TC 3.A.5.1.1                   | ABC transporter related [Haemophilus somnus str. 2336]                                                     |
| <i>P. gingivalis</i> | VBIPorGin26334_0168  | NAD-dependent glyceraldehyde-3-phosphate dehydrogenase EC 1.2.1.12                   | glyceraldehyde-3-phosphate dehydrogenase [Streptococcus pneumoniae str. TIGR4 (serotype 4)]                |
| <i>P. gingivalis</i> | VBIPorGin26334_0201  | Lipid-A-disaccharide synthase EC 2.4.1.182                                           | lipid-A-disaccharide synthase [Haemophilus ducreyi str. 35000HP]                                           |
| <i>P. gingivalis</i> | VBIPorGin26334_0222  | UDP-N-acetyl-D-mannosamine dehydrogenase EC 1.1.1.-                                  | UDP-N-acetyl-D-mannosaminuronate dehydrogenase [Vibrio vulnificus str. CMCP6 chromosome I]                 |

Supplementary Table S7. Up-regulated putative virulence factors of the 'red-complex' in disease. These virulence factors were identified bibliographically or by BLAST alignment to the VFDB as described in the methods section. In red are proteins with potential protease or peptidase activities. In green are proteins probably involved in iron metabolism.

|                      |                     |                                                                                                      |                                                                                                                          |
|----------------------|---------------------|------------------------------------------------------------------------------------------------------|--------------------------------------------------------------------------------------------------------------------------|
| <i>P. gingivalis</i> | VBIPorGin26334_0223 | probable glycosyltransferase                                                                         | Glycosyltransferase [Bacillus cereus str. ATCC 14579]                                                                    |
| <i>P. gingivalis</i> | VBIPorGin26334_0229 | Dolichol-phosphate mannosyltransferase EC 2.4.1.83 in lipid-linked oligosaccharide synthesis cluster | Glycosyltransferase involved in cell wall biogenesis [Streptococcus thermophilus str. LMD-9 (nonpathogenic)]             |
| <i>P. gingivalis</i> | VBIPorGin26334_0230 | Probable UDP-N-acetyl-D-mannosaminuronic acid transferase EC 2.4.1.-                                 | UDP-N-acetyl-D-mannosamine transferase [Streptococcus pneumoniae str. Hungary19A-6 (serotype 19A)]                       |
| <i>P. gingivalis</i> | VBIPorGin26334_0231 | UDP-N-acetylglucosamine 2-epimerase EC 5.1.3.14                                                      | UDP-N-acetylglucosamine 2-epimerase [Vibrio vulnificus str. YJ016 chromosome I]                                          |
| <i>P. gingivalis</i> | VBIPorGin26334_0249 | Malonyl CoA-acyl carrier protein transacylase EC 2.3.1.39                                            | Type I modular polyketide synthase [Mycobacterium ulcerans str. Agy99 plasmid pMUM001]                                   |
| <i>P. gingivalis</i> | VBIPorGin26334_0249 | Malonyl CoA-acyl carrier protein transacylase EC 2.3.1.39                                            | Type I modular polyketide synthase [Mycobacterium ulcerans str. Agy99 plasmid pMUM001]                                   |
| <i>P. gingivalis</i> | VBIPorGin26334_0249 | Malonyl CoA-acyl carrier protein transacylase EC 2.3.1.39                                            | Type I modular polyketide synthase [Mycobacterium ulcerans str. Agy99 plasmid pMUM001]                                   |
| <i>P. gingivalis</i> | VBIPorGin26334_0249 | Malonyl CoA-acyl carrier protein transacylase EC 2.3.1.39                                            | Type I modular polyketide synthase [Mycobacterium ulcerans str. Agy99 plasmid pMUM001]                                   |
| <i>P. gingivalis</i> | VBIPorGin26334_0260 | Transcriptional regulator                                                                            | transcriptional regulator FleQ [Pseudomonas entomophila str. L48]                                                        |
| <i>P. gingivalis</i> | VBIPorGin26334_0296 | Undecaprenyl diphosphate synthase EC 2.5.1.31                                                        | undecaprenyl diphosphate synthase [Enterococcus faecalis str. V583]                                                      |
| <i>P. gingivalis</i> | VBIPorGin26334_0369 | Hemolysins and related proteins containing CBS domains                                               | CBS transporter associated domain protein [Clostridium perfringens str. ATCC 13124]                                      |
| <i>P. gingivalis</i> | VBIPorGin26334_0449 | ABC transporter ATP-binding protein YvcR                                                             | ABC transporter related [Haemophilus somnus str. 2336]                                                                   |
| <i>P. gingivalis</i> | VBIPorGin26334_0465 | GTP pyrophosphokinase EC 2.7.6.5 2C pppGpp synthetase I                                              | GTP pyrophosphokinase RelA [Mycobacterium sp. str. JDM601]                                                               |
| <i>P. gingivalis</i> | VBIPorGin26334_0540 | 3-deoxy-D-manno-octulosonic-acid transferase EC 2.-.-.-                                              | Three-deoxy-D-manno-octulosonic-acid transferase domain protein [Haemophilus somnus str. 2336]                           |
| <i>P. gingivalis</i> | VBIPorGin26334_0543 | dTDP-4-dehydrorhamnose 3 2C5-epimerase EC 5.1.3.13                                                   | dTDP-6-deoxy-D-xylo-4-hexulose-3 5-epimerase [Vibrio vulnificus str. YJ016 chromosome I]                                 |
| <i>P. gingivalis</i> | VBIPorGin26334_0544 | dTDP-4-dehydrorhamnose reductase EC 1.1.1.133                                                        | dTDP-4-dehydrorhamnose reductase [Vibrio vulnificus str. YJ016 chromosome I]                                             |
| <i>P. gingivalis</i> | VBIPorGin26334_0545 | dTDP-glucose 4 2C6-dehydratase EC 4.2.1.46                                                           | dTDP-glucose 4 6-dehydratase [Vibrio fischeri str. ES114 chromosome I]                                                   |
| <i>P. gingivalis</i> | VBIPorGin26334_0554 | FIG00935712 hypothetical protein                                                                     | streptococcal pyrogenic exotoxin B [Streptococcus pyogenes str. MGAS6180 (serotype M28)]                                 |
| <i>P. gingivalis</i> | VBIPorGin26334_0631 | HtrA protease chaperone protein                                                                      | serine protease MucD precursor [Pseudomonas aeruginosa str. PAO1]                                                        |
| <i>P. gingivalis</i> | VBIPorGin26334_0632 | RNA polymerase sigma factor RpoD                                                                     | RNA polymerase sigma factor RpoS [Legionella pneumophila str. Paris]                                                     |
| <i>P. gingivalis</i> | VBIPorGin26334_0651 | Alkyl hydroperoxide reductase protein C EC 1.6.4.-                                                   | alkylhydroperoxide reductase [Mycobacterium intracellulare str. MOTT36Y]                                                 |
| <i>P. gingivalis</i> | VBIPorGin26334_0660 | Lipopolysaccharide ABC transporter 2C ATP-binding protein LptB                                       | ABC transporter related [Haemophilus somnus str. 2336]                                                                   |
| <i>P. gingivalis</i> | VBIPorGin26334_0670 | Tetraacyldisaccharide 4'-kinase EC 2.7.1.130                                                         | tetraacyldisaccharide 4-kinase [Haemophilus influenzae str. Rd KW20 (serotype d)]                                        |
| <i>P. gingivalis</i> | VBIPorGin26334_0675 | iron compound ABC transporter 2C ATP-binding protein                                                 | ABC transporter [Pseudomonas syringae str. B728a (pv. syringae)]                                                         |
| <i>P. gingivalis</i> | VBIPorGin26334_0697 | Vitamin B12 ABC transporter 2C permease component BtuC                                               | cobalaminFe3+-siderophores transport systems permease component [Corynebacterium glutamicum str. ATCC 13032 (Bielefeld)] |
| <i>P. gingivalis</i> | VBIPorGin26334_0698 | FIG00936204 hypothetical protein                                                                     | ATP-binding component of ferric enterobactin transport [Shigella flexneri str. 301 (serotype 2a)]                        |
| <i>P. gingivalis</i> | VBIPorGin26334_0711 | Succinate-semialdehyde dehydrogenase 2C CoA-dependent                                                | hypothetical protein [Listeria innocua str. Clip11262 (serovar 6a)]                                                      |
| <i>P. gingivalis</i> | VBIPorGin26334_0729 | FKBP-type peptidyl-prolyl cis-trans isomerase FkpA precursor EC 5.2.1.8                              | macrophage infectivity potentiator (Mip) [Legionella pneumophila str. Philadelphia 1]                                    |
| <i>P. gingivalis</i> | VBIPorGin26334_0731 | FKBP-type peptidyl-prolyl cis-trans isomerase FkIB EC 5.2.1.8                                        | macrophage infectivity potentiator [Legionella pneumophila str. Paris]                                                   |
| <i>P. gingivalis</i> | VBIPorGin26334_0742 | DNA-binding response regulator                                                                       | two component transcriptional regulator winged helix family [Mycobacterium vanbaalenii str. PYR-1]                       |
| <i>P. gingivalis</i> | VBIPorGin26334_0765 | Two-component system response regulator                                                              | putative two-component system response regulator [Pseudomonas fluorescens str. SBW25]                                    |
| <i>P. gingivalis</i> | VBIPorGin26334_0767 | Glycosyl transferase 2C group 2 family protein                                                       | glycosyl transferase family 2 [Yersinia pseudotuberculosis str. YPIII (serotype O:3)]                                    |

Supplementary Table S7. Up-regulated putative virulence factors of the 'red-complex' in disease. These virulence factors were identified bibliographically or by BLAST alignment to the VFDB as described in the methods section. In red are proteins with potential protease or peptidase activities. In green are proteins probably involved in iron metabolism.

|                      |                     |                                                                        |                                                                                                                     |
|----------------------|---------------------|------------------------------------------------------------------------|---------------------------------------------------------------------------------------------------------------------|
| <i>P. gingivalis</i> | VBIPorGin26334_0844 | surface antigen 2C putative                                            | hypothetical protein [ <i>Listeria monocytogenes</i> str. EGD-e (serovar 12a)]                                      |
| <i>P. gingivalis</i> | VBIPorGin26334_0844 | surface antigen 2C putative                                            | hypothetical protein [ <i>Listeria monocytogenes</i> str. EGD-e (serovar 12a)]                                      |
| <i>P. gingivalis</i> | VBIPorGin26334_0927 | 8-amino-7-oxononanoate synthase EC 2.3.1.47                            | hypothetical protein [ <i>Vibrio cholerae</i> str. N16961 (O1 biovar eltor) chromosome II]                          |
| <i>P. gingivalis</i> | VBIPorGin26334_0933 | Probable polybeta-D-mannuronate O-acetylase EC 2.3.1.-                 | membrane bound O-acyl transferase MBOAT family protein [ <i>Pseudomonas putida</i> str. W619]                       |
| <i>P. gingivalis</i> | VBIPorGin26334_0939 | ABC transporter ATP-binding protein                                    | lipoprotein inner membrane ABC-transporter [ <i>Yersinia pestis</i> str. CO92 (biovar Orientalis)]                  |
| <i>P. gingivalis</i> | VBIPorGin26334_0940 | ABC transporter 2C ATP-binding protein 2C putative                     | ABC transporter ATP-binding permease protein [ <i>Pseudomonas syringae</i> str. 1448A (pv. phaseolicola)]           |
| <i>P. gingivalis</i> | VBIPorGin26334_0967 | Phosphoribosylaminoimidazole-succinocarboxamide synthase EC 6.3.2.6    | phosphoribosylaminoimidazole-succinocarboxamide synthase [ <i>Mycobacterium smegmatis</i> str. MC2 155]             |
| <i>P. gingivalis</i> | VBIPorGin26334_0993 | ABC transporter 2C ATP-binding protein                                 | daunorubicin resistance ABC transporter ATPase subunit [ <i>Mycobacterium gilvum</i> str. PYR-GCK]                  |
| <i>P. gingivalis</i> | VBIPorGin26334_0999 | Calcium-transporting ATPase                                            | hypothetical protein [ <i>Salmonella enterica</i> str. RSK2980 (subsp. arizonae serovar 62:z4 z23:-)]               |
| <i>P. gingivalis</i> | VBIPorGin26334_1069 | GDP-mannose 4 2C6 dehydratase EC 4.2.1.47                              | GDP-mannose 4 6-dehydratase [ <i>Brucella suis</i> str. 1330 chromosome I]                                          |
| <i>P. gingivalis</i> | VBIPorGin26334_1070 | GDP-L-fucose synthetase EC 1.1.1.271                                   | GDP-fucose synthetase [ <i>Campylobacter jejuni</i> str. 269.97 (subsp. doylei)]                                    |
| <i>P. gingivalis</i> | VBIPorGin26334_1073 | Ferrous iron transport protein B                                       | ferrous iron transporter B [ <i>Legionella pneumophila</i> str. Corby]                                              |
| <i>P. gingivalis</i> | VBIPorGin26334_1179 | Transcriptional regulatory protein rprY                                | putative two-component response regulator [ <i>Mycobacterium leprae</i> str. TN]                                    |
| <i>P. gingivalis</i> | VBIPorGin26334_1182 | Phosphomannomutase EC 5.4.2.8<br>Phosphoglucosamine mutase EC 5.4.2.10 | phosphomannomutase [ <i>Pseudomonas putida</i> str. KT2440]                                                         |
| <i>P. gingivalis</i> | VBIPorGin26334_1202 | ClpB protein                                                           | probable ClpAB-type chaperone [ <i>Pseudomonas aeruginosa</i> str. PAO1]                                            |
| <i>P. gingivalis</i> | VBIPorGin26334_1226 | bacterial sugar transferase                                            | putative capsular polysaccharide biosynthesis glycosyltransferase [ <i>Vibrio cholerae</i> str. O395 chromosome II] |
| <i>P. gingivalis</i> | VBIPorGin26334_1229 | pigmentation and extracellular proteinase regulator                    | probable aminotransferase WbpE [ <i>Pseudomonas aeruginosa</i> str. PAO1]                                           |
| <i>P. gingivalis</i> | VBIPorGin26334_1234 | UDP-glucose dehydrogenase EC 1.1.1.22                                  | UDP-glucose 6-dehydrogenase [ <i>Bacillus thuringiensis</i> str. AI Hakam]                                          |
| <i>P. gingivalis</i> | VBIPorGin26334_1241 | Glycosyl transferase 2C family 2                                       | WbcM protein [ <i>Yersinia enterocolitica</i> str. 105.5R(r) (subsp. palearctica)]                                  |
| <i>P. gingivalis</i> | VBIPorGin26334_1263 | Diaminopimelate decarboxylase EC 4.1.1.20                              | diaminopimelate decarboxylase LysA [ <i>Mycobacterium</i> sp. str. JDM601]                                          |
| <i>P. gingivalis</i> | VBIPorGin26334_1297 | Ferrous iron transport protein B                                       | ferrous iron transporter B [ <i>Legionella pneumophila</i> str. Corby]                                              |
| <i>P. gingivalis</i> | VBIPorGin26334_1306 | ABC transporter 2C ATP-binding protein                                 | Fe(3+) ions import ATP-binding protein fbpC [ <i>Neisseria gonorrhoeae</i> str. NCCP11945]                          |
| <i>P. gingivalis</i> | VBIPorGin26334_1316 | branched chain amino acid transport ATP-binding protein                | iron(III) ABC transporter ATP-binding protein [ <i>Haemophilus influenzae</i> str. Rd KW20 (serotype d)]            |
| <i>P. gingivalis</i> | VBIPorGin26334_1317 | branched-chain amino acid ABC transporter 2C ATP-binding protein       | iron-utilization ATP-binding protein hFbpC [ <i>Haemophilus influenzae</i> str. 86-028NP (nontypeable)]             |
| <i>P. gingivalis</i> | VBIPorGin26334_1363 | 3-oxoacyl-acyl-carrier protein reductase EC 1.1.1.100                  | hypothetical protein [ <i>Streptococcus agalactiae</i> str. NEM316 (serotype III)]                                  |
| <i>P. gingivalis</i> | VBIPorGin26334_1392 | Ornithine aminotransferase EC 2.6.1.13                                 | 2 4-diaminobutyrate 4-transaminase [ <i>Pseudomonas mendocina</i> str. ymp]                                         |
| <i>P. gingivalis</i> | VBIPorGin26334_1434 | Heat shock protein 60 family chaperone GroEL                           | Hsp60 60K heat shock protein HtpB [ <i>Legionella pneumophila</i> str. Philadelphia 1]                              |
| <i>P. gingivalis</i> | VBIPorGin26334_1474 | Pantoate--beta-alanine ligase EC 6.3.2.1                               | pantoate--beta-alanine ligase [ <i>Mycobacterium gilvum</i> str. PYR-GCK]                                           |
| <i>P. gingivalis</i> | VBIPorGin26334_1485 | Mannose-6-phosphate isomerase EC 5.3.1.8                               | mannose-6-phosphate isomerase [ <i>Bacillus thuringiensis</i> str. AI Hakam]                                        |
| <i>P. gingivalis</i> | VBIPorGin26334_1494 | Hemolysins and related proteins containing CBS domains                 | CBS transporter associated domain protein [ <i>Clostridium perfringens</i> str. ATCC 13124]                         |
| <i>P. gingivalis</i> | VBIPorGin26334_1508 | Tyrosine-protein kinase Wzc EC 2.7.10.2                                | chain length regulator (capsular polysaccharide biosynthesis) [ <i>Vibrio fischeri</i> str. ES114 chromosome I]     |
| <i>P. gingivalis</i> | VBIPorGin26334_1517 | Carbonic anhydrase EC 4.2.1.1                                          | putative carbonic anhydrase [ <i>Salmonella typhimurium</i> str. LT2 plasmid pSLT]                                  |
| <i>P. gingivalis</i> | VBIPorGin26334_1563 | Membrane-associated zinc metalloprotease                               | membrane-associated zinc metalloprotease putative [ <i>Pseudomonas fluorescens</i> str. Pf-5]                       |

Supplementary Table S7. Up-regulated putative virulence factors of the 'red-complex' in disease. These virulence factors were identified bibliographically or by BLAST alignment to the VFDB as described in the methods section. In red are proteins with potential protease or peptidase activities. In green are proteins probably involved in iron metabolism.

|                      |                     |                                                                                                                              |                                                                                                                     |
|----------------------|---------------------|------------------------------------------------------------------------------------------------------------------------------|---------------------------------------------------------------------------------------------------------------------|
| <i>P. gingivalis</i> | VBIPorGin26334_1589 | FIG00936311 hypothetical protein                                                                                             | hypothetical protein [Listeria monocytogenes str. EGD-e (serovar 12a)]                                              |
| <i>P. gingivalis</i> | VBIPorGin26334_1589 | FIG00936311 hypothetical protein                                                                                             | hypothetical protein [Listeria monocytogenes str. EGD-e (serovar 12a)]                                              |
| <i>P. gingivalis</i> | VBIPorGin26334_1589 | FIG00936311 hypothetical protein                                                                                             | hypothetical protein [Listeria monocytogenes str. EGD-e (serovar 12a)]                                              |
| <i>P. gingivalis</i> | VBIPorGin26334_1592 | UDP-glucose 4-epimerase EC 5.1.3.2                                                                                           | UDP-glucose 4-epimerase [Bacillus cereus str. ATCC 10987]                                                           |
| <i>P. gingivalis</i> | VBIPorGin26334_1605 | Glycosyltransferase                                                                                                          | putative bactoprenol glucosyl transferase [Shigella flexneri str. 301 (serotype 2a)]                                |
| <i>P. gingivalis</i> | VBIPorGin26334_1628 | Glycosyl transferase                                                                                                         | putative bactoprenol glucosyl transferase [Shigella flexneri str. 301 (serotype 2a)]                                |
| <i>P. gingivalis</i> | VBIPorGin26334_1678 | 3-oxoacyl-acyl-carrier-protein synthase 2C KASII EC 2.3.1.41                                                                 | 3-oxoacyl-[acyl-carrier-protein] synthase 2 [Mycobacterium smegmatis str. MC2 155]                                  |
| <i>P. gingivalis</i> | VBIPorGin26334_1696 | 8-amino-7-oxononanoate synthase EC 2.3.1.47                                                                                  | hypothetical protein [Vibrio parahaemolyticus str. RIMD 2210633 chromosome II]                                      |
| <i>P. gingivalis</i> | VBIPorGin26334_1726 | 3-deoxy-manno-octulosonate cytidyltransferase EC 2.7.7.38                                                                    | 3-deoxy-D-manno-octulosonate cytidyltransferase [Haemophilus somnus str. 2336]                                      |
| <i>P. gingivalis</i> | VBIPorGin26334_1734 | GTP pyrophosphokinase EC 2.7.6.5 2C pppGpp synthetase II Guanosine-3' 2C5'-bisdiphosphate 3'-pyrophosphohydrolase EC 3.1.7.2 | GTP pyrophosphokinase RelA [Mycobacterium marinum str. M]                                                           |
| <i>P. gingivalis</i> | VBIPorGin26334_1738 | V-type ATP synthase subunit B EC 3.6.3.14                                                                                    | type III secretion system ATP synthase [Yersinia pestis str. Pestoides F]                                           |
| <i>P. gingivalis</i> | VBIPorGin26334_1739 | V-type ATP synthase subunit A EC 3.6.3.14                                                                                    | type III secretion system ATPase [Vibrio parahaemolyticus str. RIMD 2210633 chromosome I]                           |
| <i>P. gingivalis</i> | VBIPorGin26334_1887 | ABC transporter 2C ATP-binding protein 2C putative                                                                           | ABC transporter ATP-binding permease protein [Pseudomonas syringae str. 1448A (pv. phaseolicola)]                   |
| <i>P. gingivalis</i> | VBIPorGin26334_1888 | ABC transporter ATP-binding protein                                                                                          | lipoprotein inner membrane ABC-transporter [Yersinia pestis str. CO92 (biovar Orientalis)]                          |
| <i>P. gingivalis</i> | VBIPorGin26334_1922 | Phosphoglucomutase EC 5.4.2.2                                                                                                | probable phosphomannomutase [Haemophilus ducreyi str. 35000HP]                                                      |
| <i>P. gingivalis</i> | VBIPorGin26334_1982 | Acyl-acyl-carrier-protein--UDP-N-acetylglucosamine O-acyltransferase EC 2.3.1.129                                            | UDP-N-acetylglucosamine acyltransferase [Haemophilus ducreyi str. 35000HP]                                          |
| <i>P. gingivalis</i> | VBIPorGin26334_1984 | UDP-3-O-3-hydroxymyristoyl glucosamine N-acyltransferase EC 2.3.1.-                                                          | UDP-3-O-[3-hydroxymyristoyl] glucosamine N-acyltransferase [Haemophilus influenzae str. 86-028NP (nontypeable)]     |
| <i>P. gingivalis</i> | VBIPorGin26334_1998 | Arabinose 5-phosphate isomerase EC 5.3.1.13                                                                                  | arabinose-5-phosphate isomerase [Campylobacter jejuni str. 269.97 (subsp. doylei)]                                  |
| <i>P. gingivalis</i> | VBIPorGin26334_2018 | oxidoreductase 2C short chain dehydrogenase reductase family                                                                 | cylG protein [Streptococcus agalactiae str. A909 (serotype Ia)]                                                     |
| <i>P. gingivalis</i> | VBIPorGin26334_2043 | Mannose-1-phosphate guanylyltransferase GDP EC 2.7.7.22                                                                      | Mannose-1-phosphate guanylyltransferase ManC protein [Yersinia enterocolitica str. 105.5R(r) (subsp. palearctica)]  |
| <i>T. forsythia</i>  | VBITanFor42681_0010 | 3-oxoacyl-acyl-carrier-protein synthase 2C KASI EC 2.3.1.41                                                                  | beta-ketoacyl synthase [Mycobacterium sp. str. MCS]                                                                 |
| <i>T. forsythia</i>  | VBITanFor42681_0016 | iron chelate uptake ABC transporter 2C FeCT family 2C permease protein                                                       | Iron-related transport system membrane protein [Corynebacterium diphtheriae str. NCTC 13129 (biotype gravis)]       |
| <i>T. forsythia</i>  | VBITanFor42681_0095 | ABC transporter ATP-binding protein                                                                                          | alpha-hemolysin translocation ATP-binding protein HlyB [Escherichia coli str. 536 (UPEC)]                           |
| <i>T. forsythia</i>  | VBITanFor42681_0108 | Lipid A export ATP-binding permease protein MsbA                                                                             | ABC transporter ATP-binding permease protein [Pseudomonas syringae str. DC3000 (pv. tomato)]                        |
| <i>T. forsythia</i>  | VBITanFor42681_0109 | Lipid A export ATP-binding permease protein MsbA                                                                             | ABC transporter ATP-binding permease protein [Pseudomonas syringae str. 1448A (pv. phaseolicola)]                   |
| <i>T. forsythia</i>  | VBITanFor42681_0157 | Acyl-coenzyme A synthetases AMP-fatty acid ligases                                                                           | vibriobactin-specific 2 3-dihydroxybenzoate-AMP ligase [Vibrio cholerae str. N16961 (O1 biovar eltor) chromosome I] |
| <i>T. forsythia</i>  | VBITanFor42681_0239 | NAD-dependent glyceraldehyde-3-phosphate dehydrogenase EC 1.2.1.12                                                           | glyceraldehyde-3-phosphate dehydrogenase [Streptococcus agalactiae str. NEM316 (serotype III)]                      |
| <i>T. forsythia</i>  | VBITanFor42681_0261 | UDP-glucose 4-epimerase EC 5.1.3.2                                                                                           | UDP-glucose 4-epimerase [Bacillus cereus str. ATCC 10987]                                                           |
| <i>T. forsythia</i>  | VBITanFor42681_0280 | Glucose-1-phosphate thymidyltransferase EC 2.7.7.24                                                                          | D-glucose-1-phosphate thymidyltransferase [Vibrio vulnificus str. YJ016 chromosome I]                               |
| <i>T. forsythia</i>  | VBITanFor42681_0289 | Pantoate--beta-alanine ligase EC 6.3.2.1                                                                                     | pantoate--beta-alanine ligase [Mycobacterium abscessus str. ATCC 19977]                                             |
| <i>T. forsythia</i>  | VBITanFor42681_0384 | HtrA protease chaperone protein                                                                                              | serine protease MucD precursor [Pseudomonas aeruginosa str. UCBPP-PA14]                                             |
| <i>T. forsythia</i>  | VBITanFor42681_0415 | ABC transporter ATP-binding protein YvcR                                                                                     | ABC transporter related [Haemophilus somnus str. 2336]                                                              |

Supplementary Table S7. Up-regulated putative virulence factors of the 'red-complex' in disease. These virulence factors were identified bibliographically or by BLAST alignment to the VFDB as described in the methods section. In red are proteins with potential protease or peptidase activities. In green are proteins probably involved in iron metabolism.

|                     |                     |                                                                                                                  |                                                                                                                           |
|---------------------|---------------------|------------------------------------------------------------------------------------------------------------------|---------------------------------------------------------------------------------------------------------------------------|
| <i>T. forsythia</i> | VBITanFor42681_0425 | glycosyltransferase 2C group 1 family protein                                                                    | Mannosyltransferase [Brucella suis str. ATCC 23445 chromosome I]                                                          |
| <i>T. forsythia</i> | VBITanFor42681_0484 | UDP-glucose dehydrogenase EC 1.1.1.22                                                                            | UDP-glucose 6-dehydrogenase [Bacillus cereus str. ATCC 10987]                                                             |
| <i>T. forsythia</i> | VBITanFor42681_0493 | polysaccharide biosynthesis protein                                                                              | exopolysaccharide biosynthesis protein [Streptococcus thermophilus str. CNRZ1066 (nonpathogenic)]                         |
| <i>T. forsythia</i> | VBITanFor42681_0501 | V-type ATP synthase subunit A EC 3.6.3.14                                                                        | Secretion system apparatus ATP synthase ssaN [Yersinia enterocolitica str. 105.5R(r) (subsp. palearctica)]                |
| <i>T. forsythia</i> | VBITanFor42681_0581 | ATP synthase alpha chain EC 3.6.3.14                                                                             | flagellar protein export ATPase FliI [Campylobacter fetus str. 82-40 (subsp. fetus)]                                      |
| <i>T. forsythia</i> | VBITanFor42681_0588 | ATP synthase beta chain EC 3.6.3.14                                                                              | type III secretion system ATPase [Pseudomonas aeruginosa str. LESB58]                                                     |
| <i>T. forsythia</i> | VBITanFor42681_0597 | Probable polybeta-D-mannuronate O-acetylase EC 2.3.1.-                                                           | membrane bound O-acyl transferase MBOAT family protein [Pseudomonas putida str. F1]                                       |
| <i>T. forsythia</i> | VBITanFor42681_0624 | thermolysin metalloproteinase 2C catalytic domain protein                                                        | Zinc metalloproteinase precursor [Listeria monocytogenes str. Clip81459 (serotype 4b)]                                    |
| <i>T. forsythia</i> | VBITanFor42681_0635 | Cell division transporter 2C ATP-binding protein FtsE TC 3.A.5.1.1                                               | Fe(3+) ions import ATP-binding protein fbpC [Neisseria gonorrhoeae str. NCCP11945]                                        |
| <i>T. forsythia</i> | VBITanFor42681_0637 | Diaminopimelate decarboxylase EC 4.1.1.20                                                                        | diaminopimelate decarboxylase [Mycobacterium vanbaalenii str. PYR-1]                                                      |
| <i>T. forsythia</i> | VBITanFor42681_0665 | GTP pyrophosphokinase EC 2.7.6.5<br>Guanosine-3' 2C5'-bisdiphosphate<br>3'-pyrophosphohydrolase EC 3.1.7.2       | GTP pyrophosphokinase RelA [Mycobacterium sp. str. JDM601]                                                                |
| <i>T. forsythia</i> | VBITanFor42681_0714 | arylsulfatase                                                                                                    | predicted PE--lipooligosaccharide phosphorylethanolamine transferase [Haemophilus influenzae str. 86-028NP (nontypeable)] |
| <i>T. forsythia</i> | VBITanFor42681_0765 | ABC transporter ATP-binding protein                                                                              | alpha-hemolysin translocation ATP-binding protein HlyB [Escherichia coli str. 536 (UPEC)]                                 |
| <i>T. forsythia</i> | VBITanFor42681_0797 | putative transcriptional regulatory protein RprY                                                                 | two component response transcriptional regulatory protein prra [Mycobacterium intracellulare str. MOTT 64]                |
| <i>T. forsythia</i> | VBITanFor42681_0824 | Pleiotropic regulatory protein                                                                                   | probable aminotransferase WbpE [Pseudomonas aeruginosa str. PAO1]                                                         |
| <i>T. forsythia</i> | VBITanFor42681_0931 | Arabinose 5-phosphate isomerase EC 5.3.1.13                                                                      | arabinose-5-phosphate isomerase [Campylobacter jejuni str. 269.97 (subsp. doylei)]                                        |
| <i>T. forsythia</i> | VBITanFor42681_0937 | Glycosyl transferase 2C group 2 family protein                                                                   | hypothetical protein [Mycobacterium avium str. K-10 (subsp. paratuberculosis)]                                            |
| <i>T. forsythia</i> | VBITanFor42681_0943 | UDP-N-acetylglucosamine 2-epimerase EC 5.1.3.14                                                                  | UDP-N-acetylglucosamine 2-epimerase [Vibrio cholerae str. O395 chromosome II]                                             |
| <i>T. forsythia</i> | VBITanFor42681_0955 | UDP-N-acetylglucosamine 2-epimerase EC 5.1.3.14                                                                  | UDP-N-acetylglucosamine 2-epimerase [Pseudomonas aeruginosa str. PA7]                                                     |
| <i>T. forsythia</i> | VBITanFor42681_0956 | N-acetylneuraminate synthase EC 2.5.1.56                                                                         | N-acetylneuraminic acid synthetase [Campylobacter jejuni str. NCTC 11168 (subsp. jejuni)]                                 |
| <i>T. forsythia</i> | VBITanFor42681_1095 | putative transcriptional regulatory protein afsQ1                                                                | two component response transcriptional regulatory protein prra [Mycobacterium intracellulare str. MOTT 64]                |
| <i>T. forsythia</i> | VBITanFor42681_1156 | probable bacteriocin lantibiotic ABC transporter 2C ATP-binding protein                                          | hemolysin B [Escherichia coli str. Sakai (EHEC O157:H7) plasmid pO157]                                                    |
| <i>T. forsythia</i> | VBITanFor42681_1232 | Acyl-acyl-carrier-protein--UDP-N-acetylglucosamine O-acyltransferase EC 2.3.1.129                                | UDP-N-acetylglucosamine acyltransferase [Haemophilus ducreyi str. 35000HP]                                                |
| <i>T. forsythia</i> | VBITanFor42681_1233 | N-acetylglucosamine deacetylase EC 3.5.1.-<br>3R-hydroxymyristoyl-acyl carrier protein<br>dehydratase EC 4.2.1.- | UDP-3-O-[3-hydroxymyristoyl] N-acetylglucosamine deacetylase [Haemophilus influenzae str. Rd KW20 (serotype d)]           |
| <i>T. forsythia</i> | VBITanFor42681_1234 | UDP-3-O-3-hydroxymyristoyl glucosamine N-acyltransferase EC 2.3.1.-                                              | UDP-3-O-[3-hydroxymyristoyl] glucosamine N-acyltransferase [Haemophilus somnus str. 129PT]                                |
| <i>T. forsythia</i> | VBITanFor42681_1265 | putative bactoprenol glucosyl transferase-like protein                                                           | putative bactoprenol glucosyl transferase [Shigella flexneri str. 301 (serotype 2a)]                                      |
| <i>T. forsythia</i> | VBITanFor42681_1283 | ABC transporter ATP-binding protein                                                                              | hemolysin secretion protein HlyB [Escherichia coli str. UTI89 (UPEC)]                                                     |
| <i>T. forsythia</i> | VBITanFor42681_1301 | di-trans 2Cpoly-cis-decaprenylcistransferase                                                                     | undecaprenyl diphosphate synthase [Enterococcus faecalis str. V583]                                                       |
| <i>T. forsythia</i> | VBITanFor42681_1324 | GTP pyrophosphokinase EC 2.7.6.5 2C<br>pppGpp synthetase I                                                       | RelASpoT family (p)ppGpp synthetase [Mycobacterium gilvum str. Spyr1]                                                     |
| <i>T. forsythia</i> | VBITanFor42681_1339 | NAD-dependent 4-hydroxybutyrate dehydrogenase EC 1.1.1.61                                                        | hypothetical protein [Listeria innocua str. Clip11262 (serovar 6a)]                                                       |
| <i>T. forsythia</i> | VBITanFor42681_1340 | Succinate-semialdehyde dehydrogenase 2C<br>CoA-dependent                                                         | hypothetical protein [Listeria innocua str. Clip11262 (serovar 6a)]                                                       |
| <i>T. forsythia</i> | VBITanFor42681_1430 | putative coproporphyrinogen dehydrogenase                                                                        | coproporphyrinogen III oxidase [Haemophilus influenzae str. PittGG (nontypeable)]                                         |

Supplementary Table S7. Up-regulated putative virulence factors of the 'red-complex' in disease. These virulence factors were identified bibliographically or by BLAST alignment to the VFDB as described in the methods section. In red are proteins with potential protease or peptidase activities. In green are proteins probably involved in iron metabolism.

|                     |                     |                                                                        |                                                                                                                                   |
|---------------------|---------------------|------------------------------------------------------------------------|-----------------------------------------------------------------------------------------------------------------------------------|
| <i>T. forsythia</i> | VBITanFor42681_1471 | ABC transporter ATP-binding protein                                    | lipoprotein inner membrane ABC-transporter [Yersinia pestis str. Pestoides F]                                                     |
| <i>T. forsythia</i> | VBITanFor42681_1473 | ABC transporter 2C ATP-binding protein                                 | ABC transporter ATP-binding permease protein [Pseudomonas syringae str. 1448A (pv. phaseolicola)]                                 |
| <i>T. forsythia</i> | VBITanFor42681_1538 | Putative dipeptidase 2C pyoverdin biosynthesis                         | dipeptidase putative [Pseudomonas putida str. KT2440]                                                                             |
| <i>T. forsythia</i> | VBITanFor42681_1541 | ABC transporter ATP-binding protein                                    | Hemolysin B [Escherichia coli str. CFT073 (UPEC)]                                                                                 |
| <i>T. forsythia</i> | VBITanFor42681_1576 | hypothetical protein                                                   | transport protein ysiA [Clostridium perfringens str. SM101]                                                                       |
| <i>T. forsythia</i> | VBITanFor42681_1635 | exopolysaccharide biosynthesis polyprenyl glycosylphosphotransferase   | putative capsular polysaccharide biosynthesis glycosyltransferase [Vibrio cholerae str. O395 chromosome II]                       |
| <i>T. forsythia</i> | VBITanFor42681_1707 | Phosphomannomutase EC 5.4.2.8<br>Phosphoglucosamine mutase EC 5.4.2.10 | phosphomannomutase [Pseudomonas putida str. KT2440]                                                                               |
| <i>T. forsythia</i> | VBITanFor42681_1745 | Superoxide dismutase Fe EC 1.15.1.1                                    | [Mn] superoxide dismutase [Mycobacterium smegmatis str. MC2 155]                                                                  |
| <i>T. forsythia</i> | VBITanFor42681_1751 | 3-deoxy-D-manno-octulosonic-acid transferase EC 2.-.-.-                | 3-deoxy-D-manno-octulosonic-acid transferase [Haemophilus ducreyi str. 35000HP]                                                   |
| <i>T. forsythia</i> | VBITanFor42681_1794 | glycosyltransferase 2C group 2 family protein                          | Putative glycosyl transferase [Bordetella avium str. 197N]                                                                        |
| <i>T. forsythia</i> | VBITanFor42681_1799 | putative membrane protein                                              | putative O-unit flippase [Yersinia pseudotuberculosis str. IP32953 (serotype I)]                                                  |
| <i>T. forsythia</i> | VBITanFor42681_1804 | Alpha-D-GlcNAc alpha-1<br>2C2-L-rhamnosyltransferase EC 2.4.1.-        | rhamnosyltransferase putative [Streptococcus gordonii str. Challis (substr. CH1)]                                                 |
| <i>T. forsythia</i> | VBITanFor42681_1819 | Transcriptional regulatory protein rprY                                | response regulator mprA [Mycobacterium indicus pranii str. MTCC 9506]                                                             |
| <i>T. forsythia</i> | VBITanFor42681_1856 | Ferrous iron transport protein B                                       | ferrous iron transporter B [Legionella pneumophila str. Lens]                                                                     |
| <i>T. forsythia</i> | VBITanFor42681_1876 | Enolase EC 4.2.1.11                                                    | enolase [Streptococcus gordonii str. Challis (substr. CH1)]                                                                       |
| <i>T. forsythia</i> | VBITanFor42681_1884 | TonB-dependent receptor                                                | iron-regulated outer membrane virulence protein TonB receptor family [Vibrio cholerae str. N16961 (O1 biovar eltor) chromosome I] |
| <i>T. forsythia</i> | VBITanFor42681_1932 | dTDP-glucose 4 2C6-dehydratase EC 4.2.1.46                             | dTDP-glucose 4 6-dehydratase [Vibrio fischeri str. ES114 chromosome I]                                                            |
| <i>T. forsythia</i> | VBITanFor42681_1951 | Phosphoglucomutase EC 5.4.2.2                                          | probable phosphomannomutase [Haemophilus ducreyi str. 35000HP]                                                                    |
| <i>T. forsythia</i> | VBITanFor42681_1961 | Glycosyltransferase                                                    | putative bactoprenol glucosyl transferase [Shigella flexneri str. 301 (serotype 2a)]                                              |
| <i>T. forsythia</i> | VBITanFor42681_1976 | 3-oxoacyl-acyl-carrier protein reductase EC 1.1.1.100                  | hypothetical protein [Streptococcus agalactiae str. NEM316 (serotype III)]                                                        |
| <i>T. forsythia</i> | VBITanFor42681_1991 | Adenylate cyclase EC 4.6.1.1                                           | Multi-sensor Hybrid Histidine Kinase [Pseudomonas fluorescens str. Pf0-1]                                                         |
| <i>T. forsythia</i> | VBITanFor42681_2037 | dTDP-glucose 4 2C6-dehydratase EC 4.2.1.46                             | hypothetical protein [Campylobacter jejuni str. 81116 (NCTC11828)]                                                                |
| <i>T. forsythia</i> | VBITanFor42681_2078 | gluconate 5-dehydrogenase                                              | cylG protein [Streptococcus agalactiae str. A909 (serotype Ia)]                                                                   |
| <i>T. forsythia</i> | VBITanFor42681_2241 | peptidyl-prolyl cis-trans isomerase 2C FKBP-type                       | macrophage infectivity potentiator [Legionella pneumophila str. Paris]                                                            |
| <i>T. forsythia</i> | VBITanFor42681_2242 | outer membrane protein MIP                                             | macrophage infectivity potentiator [Legionella pneumophila str. Paris]                                                            |
| <i>T. forsythia</i> | VBITanFor42681_2499 | gliding motility-associated protein GldE                               | CBStransporter associated domain protein [Clostridium perfringens str. ATCC 13124]                                                |
| <i>T. forsythia</i> | VBITanFor42681_2530 | UDP-glucose dehydrogenase EC 1.1.1.22                                  | UDP-glucoseGDP-mannose dehydrogenase-like protein [Pseudomonas aeruginosa str. LESB58]                                            |
| <i>T. forsythia</i> | VBITanFor42681_2531 | Mannose-1-phosphate guanylyltransferase GDP EC 2.7.7.22                | Mannose-1-phosphate guanylyltransferase ManC protein [Yersinia enterocolitica str. 105.5R(r) (subsp. palearctica)]                |
| <i>T. forsythia</i> | VBITanFor42681_2537 | Phosphoribosylaminoimidazole-succinocarboxamide synthase EC 6.3.2.6    | phosphoribosylaminoimidazole-succinocarboxamide synthase [Mycobacterium sp. str. JLS]                                             |
| <i>T. forsythia</i> | VBITanFor42681_2565 | hypothetical protein                                                   | hypothetical protein [Listeria innocua str. Clip11262 (serovar 6a)]                                                               |
| <i>T. forsythia</i> | VBITanFor42681_2619 | Protein export cytoplasm protein SecA ATPase RNA helicase TC 3.A.5.1.1 | preprotein translocase subunit SecA [Mycobacterium abscessus str. ATCC 19977]                                                     |
| <i>T. forsythia</i> | VBITanFor42681_2619 | Protein export cytoplasm protein SecA ATPase RNA helicase TC 3.A.5.1.1 | preprotein translocase subunit SecA [Mycobacterium abscessus str. ATCC 19977]                                                     |
| <i>T. forsythia</i> | VBITanFor42681_2624 | Glycosyltransferase                                                    | Sugar transferase involved in lipopolysaccharide synthesis [Vibrio vulnificus str. CMCP6 chromosome II]                           |
| <i>T. forsythia</i> | VBITanFor42681_2661 | GDP-mannose 4 2C6 dehydratase EC 4.2.1.47                              | GDP-mannose 4 6-dehydratase [Brucella suis str. 1330 chromosome I]                                                                |

Supplementary Table S7. Up-regulated putative virulence factors of the 'red-complex' in disease. These virulence factors were identified bibliographically or by BLAST alignment to the VFDB as described in the methods section. In red are proteins with potential protease or peptidase activities. In green are proteins probably involved in iron metabolism.

|                     |                      |                                                              |                                                                                                                                                 |
|---------------------|----------------------|--------------------------------------------------------------|-------------------------------------------------------------------------------------------------------------------------------------------------|
| <i>T. forsythia</i> | VBITanFor42681_2676  | ABC transporter 2C ATP-binding protein                       | lipid A export ATP-binding protein MsbA [Haemophilus influenzae str. 86-028NP (nontypeable)]                                                    |
| <i>T. forsythia</i> | VBITanFor42681_2888  | Malonyl CoA-acyl carrier protein transacylase EC 2.3.1.39    | polyketide synthase [Mycobacterium leprae str. TN]                                                                                              |
| <i>T. denticola</i> | VBITreDen150577_0077 | sensor histidine kinase response regulator                   | two component response transcriptional regulatory protein MprA [Mycobacterium intracellulare str. MOTT36Y]                                      |
| <i>T. denticola</i> | VBITreDen150577_0191 | Ferric iron ABC transporter 2C ATP-binding protein           | ABC transporter related [Haemophilus somnus str. 2336]                                                                                          |
| <i>T. denticola</i> | VBITreDen150577_0210 | ABC transporter 2C ATP-binding permease protein              | lipid A export ATP-binding protein MsbA [Haemophilus influenzae str. 86-028NP (nontypeable)]                                                    |
| <i>T. denticola</i> | VBITreDen150577_0211 | ABC transporter 2C ATP-binding permease protein              | fused lipid transporter subunits of ABC superfamily: membrane componentATP-binding component [Haemophilus influenzae str. PittEE (nontypeable)] |
| <i>T. denticola</i> | VBITreDen150577_0230 | methyl-accepting chemotaxis protein                          | accessory colonization factor AcfB [Vibrio cholerae str. N16961 (O1 biovar eltor) chromosome I]                                                 |
| <i>T. denticola</i> | VBITreDen150577_0257 | hypothetical protein                                         | transporter HlyCCorC family [Clostridium botulinum str. Langeland (serotype F)]                                                                 |
| <i>T. denticola</i> | VBITreDen150577_0258 | hypothetical protein                                         | transporter HlyCCorC family [Clostridium botulinum str. Okra (serotype B1)]                                                                     |
| <i>T. denticola</i> | VBITreDen150577_0263 | ABC transporter 2C ATP-binding protein                       | putative ABC transporter protein [Escherichia coli str. UT189 (UPEC)]                                                                           |
| <i>T. denticola</i> | VBITreDen150577_0296 | Transport ATP-binding protein CydC                           | ABC transporter ATP-bindingpermease protein [Pseudomonas syringae str. 1448A (pv. phaseolicola)]                                                |
| <i>T. denticola</i> | VBITreDen150577_0320 | transporter                                                  | ABC transporter ATP-bindingpermease protein [Pseudomonas syringae str. DC3000 (pv. tomato)]                                                     |
| <i>T. denticola</i> | VBITreDen150577_0322 | Lipid A export ATP-binding permease protein MsbA             | ABC transporter ATP-bindingpermease protein [Pseudomonas syringae str. 1448A (pv. phaseolicola)]                                                |
| <i>T. denticola</i> | VBITreDen150577_0335 | ABC transporter 2C ATP-binding protein                       | ABC transporter ATP-bindingpermease protein [Pseudomonas syringae str. DC3000 (pv. tomato)]                                                     |
| <i>T. denticola</i> | VBITreDen150577_0336 | ABC transporter ATP-binding protein                          | ABC transporter ATP-bindingpermease protein [Pseudomonas syringae str. DC3000 (pv. tomato)]                                                     |
| <i>T. denticola</i> | VBITreDen150577_0345 | Transport ATP-binding protein CydC                           | ABC transporter ATP-binding protein MsbA [Haemophilus ducreyi str. 35000HP]                                                                     |
| <i>T. denticola</i> | VBITreDen150577_0397 | Putrescine transport ATP-binding protein PotA TC 3.A.1.11.1  | iron(III) ABC transporter ATP-binding protein [Haemophilus influenzae str. PittEE (nontypeable)]                                                |
| <i>T. denticola</i> | VBITreDen150577_0493 | UDP-N-acetylenolpyruvoylglucosamine reductase EC 1.1.1.158   | MurB family protein [Enterococcus faecalis str. V583]                                                                                           |
| <i>T. denticola</i> | VBITreDen150577_0511 | RNA polymerase sigma factor RpoD                             | stationary phase specific sigma factor RpoS [Legionella pneumophila str. Philadelphia 1]                                                        |
| <i>T. denticola</i> | VBITreDen150577_0527 | Flagellar biosynthesis protein FlhB                          | flagellar biosynthetic protein FlhB [Campylobacter jejuni str. RM1221]                                                                          |
| <i>T. denticola</i> | VBITreDen150577_0540 | Acyl-coenzyme A synthetases AMP-fatty acid ligases           | pyochelin biosynthesis protein PchD [Pseudomonas aeruginosa str. PA7]                                                                           |
| <i>T. denticola</i> | VBITreDen150577_0541 | 3-oxoacyl-acyl-carrier-protein synthase 2C KASII EC 2.3.1.41 | 3-oxoacyl-(acyl carrier protein) synthase II [Mycobacterium sp. str. JDM601]                                                                    |
| <i>T. denticola</i> | VBITreDen150577_0551 | hypothetical protein                                         | hypothetical protein [Mycobacterium avium str. K-10 (subsp. paratuberculosis)]                                                                  |
| <i>T. denticola</i> | VBITreDen150577_0586 | methyl-accepting chemotaxis protein                          | accessory colonization factor AcfB [Vibrio cholerae str. O395 chromosome II]                                                                    |
| <i>T. denticola</i> | VBITreDen150577_0587 | hypothetical protein                                         | hemolysin B [Escherichia coli str. Sakai (EHEC O157:H7) plasmid pO157]                                                                          |
| <i>T. denticola</i> | VBITreDen150577_0588 | ABC transporter 2C ATP-binding permease protein              | fused lipid transporter subunits of ABC superfamily: membrane componentATP-binding component [Haemophilus influenzae str. PittEE (nontypeable)] |
| <i>T. denticola</i> | VBITreDen150577_0597 | Flagellar hook protein FlgE                                  | flagellar hook protein [Pseudomonas aeruginosa str. PA7]                                                                                        |
| <i>T. denticola</i> | VBITreDen150577_0599 | Flagellar motor rotation protein MotA                        | flagellar motor protein [Vibrio parahaemolyticus str. RIMD 2210633 chromosome I]                                                                |
| <i>T. denticola</i> | VBITreDen150577_0600 | Flagellar motor rotation protein MotB                        | OmpAMotB domain protein [Pseudomonas mendocina str. ymp]                                                                                        |
| <i>T. denticola</i> | VBITreDen150577_0602 | Flagellar motor switch protein FliM                          | hypothetical protein [Helicobacter acinonychis str. Sheeba]                                                                                     |
| <i>T. denticola</i> | VBITreDen150577_0605 | Flagellar biosynthesis protein FliP                          | flagellar biosynthetic protein FliP [Campylobacter fetus str. 82-40 (subsp. fetus)]                                                             |
| <i>T. denticola</i> | VBITreDen150577_0670 | Flagellar synthesis regulator FleN                           | ParA family protein [Vibrio cholerae str. O395 chromosome II]                                                                                   |

Supplementary Table S7. Up-regulated putative virulence factors of the 'red-complex' in disease. These virulence factors were identified bibliographically or by BLAST alignment to the VFDB as described in the methods section. In red are proteins with potential protease or peptidase activities. In green are proteins probably involved in iron metabolism.

|                     |                      |                                                                                            |                                                                                                                                                         |
|---------------------|----------------------|--------------------------------------------------------------------------------------------|---------------------------------------------------------------------------------------------------------------------------------------------------------|
| <i>T. denticola</i> | VBITreDen150577_0672 | RNA polymerase sigma factor SigB                                                           | RNA polymerase sigma factor for flagellar operon [ <i>Yersinia enterocolitica</i> str. 8081 (biotype 1B)]                                               |
| <i>T. denticola</i> | VBITreDen150577_0685 | Undecaprenyl-phosphate N-acetylglucosaminyl 1-phosphate transferase EC 2.7.8.-             | putative glycosyl transferase N-acetylglucosaminyltransferase) RgpG [ <i>Streptococcus mutans</i> str. UA159]                                           |
| <i>T. denticola</i> | VBITreDen150577_0708 | ABC transporter 2C ATP-binding protein                                                     | ABC transporter related [ <i>Haemophilus somnus</i> str. 2336]                                                                                          |
| <i>T. denticola</i> | VBITreDen150577_0711 | Glycerol-3-phosphate dehydrogenase EC 1.1.5.3                                              | hypothetical protein [ <i>Shigella flexneri</i> str. 2457T (serotype 2a)]                                                                               |
| <i>T. denticola</i> | VBITreDen150577_0726 | Transport ATP-binding protein CydD                                                         | ABC transporter ATP-bindingpermease protein [ <i>Pseudomonas syringae</i> str. DC3000 (pv. tomato)]                                                     |
| <i>T. denticola</i> | VBITreDen150577_0728 | Transport ATP-binding protein CydC                                                         | ABC transporter ATP-bindingpermease protein [ <i>Pseudomonas syringae</i> str. 1448A (pv. phaseolicola)]                                                |
| <i>T. denticola</i> | VBITreDen150577_0796 | hypothetical protein                                                                       | fused lipid transporter subunits of ABC superfamily: membrane componentATP-binding component [ <i>Haemophilus influenzae</i> str. PittEE (nontypeable)] |
| <i>T. denticola</i> | VBITreDen150577_0797 | ABC transporter ATP-binding protein                                                        | putative ATP binding cassette (ABC) transporter [ <i>Escherichia coli</i> str. 536 (UPEC)]                                                              |
| <i>T. denticola</i> | VBITreDen150577_0840 | hypothetical protein                                                                       | fused lipid transporter subunits of ABC superfamily: membrane componentATP-binding component [ <i>Haemophilus influenzae</i> str. PittEE (nontypeable)] |
| <i>T. denticola</i> | VBITreDen150577_0841 | Lipid A export ATP-binding permease protein MsbA                                           | fused lipid transporter subunits of ABC superfamily: membrane componentATP-binding component [ <i>Haemophilus influenzae</i> str. PittEE (nontypeable)] |
| <i>T. denticola</i> | VBITreDen150577_0934 | Oligopeptide transport ATP-binding protein OppF TC 3.A.1.5.1                               | oligopeptide ABC transporter permease component [ <i>Mycoplasma mycoides</i> str. PG1]                                                                  |
| <i>T. denticola</i> | VBITreDen150577_0934 | Oligopeptide transport ATP-binding protein OppF TC 3.A.1.5.1                               | oligopeptide ABC transporter permease component [ <i>Mycoplasma mycoides</i> str. PG1]                                                                  |
| <i>T. denticola</i> | VBITreDen150577_0999 | Flagellar hook-associated protein FlgK                                                     | flagellar hook-associated protein FlgK [ <i>Campylobacter fetus</i> str. 82-40 (subsp. fetus)]                                                          |
| <i>T. denticola</i> | VBITreDen150577_1008 | Undecaprenyl pyrophosphate synthetase EC 2.5.1.31                                          | undecaprenyl diphosphate synthase [ <i>Enterococcus faecalis</i> str. V583]                                                                             |
| <i>T. denticola</i> | VBITreDen150577_1011 | membrane-associated zinc metalloprotease                                                   | putative membrane-associated zinc metalloprotease [ <i>Pseudomonas aeruginosa</i> str. UCBPP-PA14]                                                      |
| <i>T. denticola</i> | VBITreDen150577_1025 | ClpB protein                                                                               | type VI secretion ATPase ClpV1 family [ <i>Pseudomonas putida</i> str. GB-1]                                                                            |
| <i>T. denticola</i> | VBITreDen150577_1036 | COG1272 Predicted membrane protein hemolysin III homolog                                   | hemolysin III [ <i>Clostridium botulinum</i> str. Okra (serotype B1)]                                                                                   |
| <i>T. denticola</i> | VBITreDen150577_1042 | sigma-54 dependent transcriptional regulator 2C putative                                   | flagellar regulator FleQ [ <i>Pseudomonas syringae</i> str. 1448A (pv. phaseolicola)]                                                                   |
| <i>T. denticola</i> | VBITreDen150577_1050 | Outer membrane stress sensor protease DegS                                                 | alginate biosynthesis negative regulator serine protease AlgY [ <i>Pseudomonas putida</i> str. KT2440]                                                  |
| <i>T. denticola</i> | VBITreDen150577_1065 | FKBP-type peptidyl-prolyl cis-trans isomerase FkpA precursor EC 5.2.1.8                    | macrophage infectivity potentiator [ <i>Legionella pneumophila</i> str. Paris]                                                                          |
| <i>T. denticola</i> | VBITreDen150577_1084 | ABC transporter 2C ATP-binding permease protein                                            | lipid A export ATP-bindingpermease protein [ <i>Haemophilus somnus</i> str. 129PT]                                                                      |
| <i>T. denticola</i> | VBITreDen150577_1143 | Zinc ABC transporter 2C periplasmic-binding protein ZnuA                                   | putative laminin adhesion [ <i>Streptococcus pyogenes</i> str. SSI-1 (serotype M3)]                                                                     |
| <i>T. denticola</i> | VBITreDen150577_1176 | 2-amino-3-ketobutyrate coenzyme A ligase EC 2.3.1.29                                       | aminotransferase class II [ <i>Vibrio cholerae</i> str. O395 chromosome I]                                                                              |
| <i>T. denticola</i> | VBITreDen150577_1244 | ATP-dependent Clp protease ATP-binding subunit ClpA                                        | clpB protein [ <i>Vibrio cholerae</i> str. O395 chromosome I]                                                                                           |
| <i>T. denticola</i> | VBITreDen150577_1285 | sigma-54 dependent transcriptional regulator                                               | putative two-component system response regulator [ <i>Pseudomonas fluorescens</i> str. SBW25]                                                           |
| <i>T. denticola</i> | VBITreDen150577_1315 | Oligopeptide ABC transporter 2C periplasmic oligopeptide-binding protein OppA TC 3.A.1.5.1 | oligopeptide ABC transporter oligopeptide-binding protein [ <i>Listeria monocytogenes</i> str. F2365 (serovar 4b)]                                      |
| <i>T. denticola</i> | VBITreDen150577_1357 | Transport ATP-binding protein CydC                                                         | ABC transporter ATP-bindingpermease protein [ <i>Pseudomonas syringae</i> str. DC3000 (pv. tomato)]                                                     |
| <i>T. denticola</i> | VBITreDen150577_1359 | Transport ATP-binding protein CydD                                                         | lipoprotein inner membrane ABC-transporter [ <i>Yersinia pestis</i> str. CO92 (biovar Orientalis)]                                                      |
| <i>T. denticola</i> | VBITreDen150577_1384 | Flagellar basal-body rod protein FlgC                                                      | flagellar basal body rod protein FlgC [ <i>Helicobacter pylori</i> str. P12]                                                                            |
| <i>T. denticola</i> | VBITreDen150577_1386 | Flagellar M-ring protein FlIF                                                              | flagellar M-ring protein FlIF [ <i>Campylobacter jejuni</i> str. 269.97 (subsp. doylei)]                                                                |
| <i>T. denticola</i> | VBITreDen150577_1387 | Flagellar motor switch protein FlIG                                                        | flagellar motor protein [ <i>Pseudomonas fluorescens</i> str. Pf0-1]                                                                                    |
| <i>T. denticola</i> | VBITreDen150577_1389 | Flagellum-specific ATP synthase FlII                                                       | type III secretion system ATPase [ <i>Bordetella pertussis</i> str. Tohama I]                                                                           |

Supplementary Table S7. Up-regulated putative virulence factors of the 'red-complex' in disease. These virulence factors were identified bibliographically or by BLAST alignment to the VFDB as described in the methods section. In red are proteins with potential protease or peptidase activities. In green are proteins probably involved in iron metabolism.

|                     |                      |                                                                                           |                                                                                                             |
|---------------------|----------------------|-------------------------------------------------------------------------------------------|-------------------------------------------------------------------------------------------------------------|
| <i>T. denticola</i> | VBITreDen150577_1396 | Manganese ABC transporter 2C ATP-binding protein SitB                                     | Iron transport protein ATP-binding component [Shigella flexneri str. 8401 (serotype 5b)]                    |
| <i>T. denticola</i> | VBITreDen150577_1411 | Magnesium and cobalt efflux protein CorC                                                  | transporter HlyCCorC family [Clostridium botulinum str. Okra (serotype B1)]                                 |
| <i>T. denticola</i> | VBITreDen150577_1428 | Cholinephosphate cytidyltransferase EC 2.7.7.15 Choline kinase EC 2.7.1.32                | lic-1 operon protein [Haemophilus influenzae str. PittEE (nontypeable)]                                     |
| <i>T. denticola</i> | VBITreDen150577_1439 | Oligopeptide transport ATP-binding protein OppD TC 3.A.1.5.1                              | ABC transporter related [Haemophilus somnus str. 2336]                                                      |
| <i>T. denticola</i> | VBITreDen150577_1514 | FIG01187002 hypothetical protein                                                          | protease Do [Pseudomonas putida str. GB-1]                                                                  |
| <i>T. denticola</i> | VBITreDen150577_1518 | RNA polymerase sigma factor RpoD                                                          | sigma factor MysA [Mycobacterium smegmatis str. MC2 155]                                                    |
| <i>T. denticola</i> | VBITreDen150577_1587 | Phosphoenolpyruvate phosphomutase EC 5.4.2.9                                              | hypothetical protein [Campylobacter jejuni str. 81116 (NCTC11828)]                                          |
| <i>T. denticola</i> | VBITreDen150577_1588 | Phosphonopyruvate decarboxylase EC 4.1.1.82                                               | hypothetical protein [Campylobacter jejuni str. 81116 (NCTC11828)]                                          |
| <i>T. denticola</i> | VBITreDen150577_1591 | ABC transporter 2C ATP-binding protein                                                    | polysaccharide ABC exporter ATP-binding protein [Streptococcus thermophilus str. LMG 18311 (nonpathogenic)] |
| <i>T. denticola</i> | VBITreDen150577_1604 | UDP-glucose dehydrogenase EC 1.1.1.22                                                     | UDP-glucose 6-dehydrogenase putative [Streptococcus pneumoniae str. D39 (serotype 2)]                       |
| <i>T. denticola</i> | VBITreDen150577_1627 | dTDP-glucose 4 2C6-dehydratase EC 4.2.1.46                                                | dTDP-glucose 4 6-dehydratase [Vibrio fischeri str. ES114 chromosome I]                                      |
| <i>T. denticola</i> | VBITreDen150577_1665 | Flagellin protein FlaA                                                                    | flagellin FluC [Pseudomonas fluorescens str. Pf-5]                                                          |
| <i>T. denticola</i> | VBITreDen150577_1667 | Flagellin protein FlaA                                                                    | flagellin FluC [Pseudomonas fluorescens str. Pf-5]                                                          |
| <i>T. denticola</i> | VBITreDen150577_1678 | NAD-dependent glyceraldehyde-3-phosphate dehydrogenase EC 1.2.1.12                        | glyceraldehyde-3-phosphate dehydrogenase [Streptococcus pneumoniae str. CGSP14 (serotype 14)]               |
| <i>T. denticola</i> | VBITreDen150577_1684 | Chemotaxis regulator - transmits chemoreceptor signals to flagellar motor components CheY | Chemotaxis response regulator CheY [Listeria welshimeri str. SLCC5334 (serovar 6b)]                         |
| <i>T. denticola</i> | VBITreDen150577_1707 | ABC transporter 2C ATP-binding protein 2C putative                                        | iron-uptake permease ATP-binding protein [Neisseria meningitidis str. Z2491 (serogroup A)]                  |
| <i>T. denticola</i> | VBITreDen150577_1735 | Lipoate-protein ligase A                                                                  | hypothetical protein [Listeria monocytogenes str. EGD-e (serovar 12a)]                                      |
| <i>T. denticola</i> | VBITreDen150577_1861 | Cell division trigger factor EC 5.2.1.8                                                   | trigger factor [Streptococcus agalactiae str. A909 (serotype Ia)]                                           |
| <i>T. denticola</i> | VBITreDen150577_1872 | V-type ATP synthase subunit B EC 3.6.3.14                                                 | type III secretion system ATPase [Vibrio parahaemolyticus str. RIMD 2210633 chromosome I]                   |
| <i>T. denticola</i> | VBITreDen150577_1873 | V-type ATP synthase subunit A EC 3.6.3.14                                                 | ATP synthase (predicted TTSS protein) [Chlamydia trachomatis str. 434Bu (serovar L2)]                       |
| <i>T. denticola</i> | VBITreDen150577_1879 | ABC transporter 2C ATP-binding protein                                                    | daunorubicin resistance ABC transporter ATPase subunit [Mycobacterium vanbaalenii str. PYR-1]               |
| <i>T. denticola</i> | VBITreDen150577_1945 | UDP-glucose 4-epimerase EC 5.1.3.2                                                        | UDP-glucose 4-epimerase [Bacillus cereus str. ATCC 10987]                                                   |
| <i>T. denticola</i> | VBITreDen150577_2016 | ABC transporter ATP-binding protein                                                       | iron(III) ABC transporter ATP-binding protein [Haemophilus influenzae str. Rd KW20 (serotype d)]            |
| <i>T. denticola</i> | VBITreDen150577_2070 | Protein export cytoplasm protein SecA ATPase RNA helicase TC 3.A.5.1.1                    | SecA DEAD domain protein [Mycobacterium vanbaalenii str. PYR-1]                                             |
| <i>T. denticola</i> | VBITreDen150577_2109 | ABC transporter 2C ATP-binding protein                                                    | daunorubicin-DIM-transport ATP-binding protein ABC transporter DrrA [Mycobacterium marinum str. M]          |
| <i>T. denticola</i> | VBITreDen150577_2129 | Response regulator of zinc sigma-54-dependent two-component system                        | putative two-component system response regulator [Pseudomonas fluorescens str. SBW25]                       |
| <i>T. denticola</i> | VBITreDen150577_2155 | ABC-type multidrug transport system 2C ATPase and permease components                     | ABC transporter ATP-binding protein MsbA [Haemophilus ducreyi str. 35000HP]                                 |
| <i>T. denticola</i> | VBITreDen150577_2177 | internalin-related protein                                                                | hypothetical protein [Listeria monocytogenes str. EGD-e (serovar 12a)]                                      |
| <i>T. denticola</i> | VBITreDen150577_2177 | internalin-related protein                                                                | hypothetical protein [Listeria monocytogenes str. EGD-e (serovar 12a)]                                      |
| <i>T. denticola</i> | VBITreDen150577_2177 | internalin-related protein                                                                | hypothetical protein [Listeria monocytogenes str. EGD-e (serovar 12a)]                                      |
| <i>T. denticola</i> | VBITreDen150577_2177 | internalin-related protein                                                                | hypothetical protein [Listeria monocytogenes str. EGD-e (serovar 12a)]                                      |
| <i>T. denticola</i> | VBITreDen150577_2180 | 3-oxoacyl-acyl-carrier protein reductase EC 1.1.1.100                                     | cylG protein [Streptococcus agalactiae str. A909 (serotype Ia)]                                             |
| <i>T. denticola</i> | VBITreDen150577_2223 | Chemotaxis protein methyltransferase CheR EC 2.1.1.80                                     | chemotaxis methyltransferase CheR [Vibrio parahaemolyticus str. RIMD 2210633 chromosome I]                  |
| <i>T. denticola</i> | VBITreDen150577_2224 | Chemotaxis response regulator protein-glutamate methyltransferase CheB EC                 | protein-glutamate methyltransferase CheB [Vibrio cholerae str. O395 chromosome II]                          |

Supplementary Table S7. Up-regulated putative virulence factors of the 'red-complex' in disease. These virulence factors were identified bibliographically or by BLAST alignment to the VFDB as described in the methods section. In red are proteins with potential protease or peptidase activities. In green are proteins probably involved in iron metabolism.

|                     |                      | 3.1.1.61                                                                                           |                                                                                                               |
|---------------------|----------------------|----------------------------------------------------------------------------------------------------|---------------------------------------------------------------------------------------------------------------|
| <i>T. denticola</i> | VBITreDen150577_2264 | Phosphoribosylaminoimidazole-succinocarboxamide synthase EC 6.3.2.6                                | phosphoribosylaminoimidazolesuccinocarboxamide synthase [Mycobacterium gilvum str. Spyr1]                     |
| <i>T. denticola</i> | VBITreDen150577_2291 | capsular polysaccharide biosynthesis protein                                                       | Extracellular polysaccharide biosynthesis [Streptococcus gordonii str. Challis (substr. CH1)]                 |
| <i>T. denticola</i> | VBITreDen150577_2298 | UDP-4-amino-4-deoxy-L-arabinose--oxoglutarate aminotransferase EC 2.6.1.-                          | lipopolysaccharide biosynthesis protein [Bordetella avium str. 197N]                                          |
| <i>T. denticola</i> | VBITreDen150577_2319 | Vitamin B12 ABC transporter 2C permease component BtuC                                             | putative permease of iron compound ABC transport system [Escherichia coli str. O1 (APEC)]                     |
| <i>T. denticola</i> | VBITreDen150577_2326 | Translation elongation factor Tu                                                                   | elongation factor Tu [Mycoplasma penetrans str. HF-2]                                                         |
| <i>T. denticola</i> | VBITreDen150577_2380 | ABC transporter 2C ATP-binding permease protein                                                    | ABC transporter ATP-bindingpermease protein [Pseudomonas syringae str. DC3000 (pv. tomato)]                   |
| <i>T. denticola</i> | VBITreDen150577_2381 | ABC transporter 2C ATP-binding permease protein                                                    | ABC transporter ATP-bindingpermease protein [Pseudomonas syringae str. DC3000 (pv. tomato)]                   |
| <i>T. denticola</i> | VBITreDen150577_2462 | ABC transporter ATP-binding protein                                                                | ABC transporter ATP-bindingpermease protein [Pseudomonas syringae str. 1448A (pv. phaseolicola)]              |
| <i>T. denticola</i> | VBITreDen150577_2477 | ABC transporter 2C ATP-binding permease protein                                                    | lipoprotein inner membrane ABC-transporter [Yersinia pestis str. CO92 (biovar Orientalis)]                    |
| <i>T. denticola</i> | VBITreDen150577_2481 | ABC transporter 2C ATP-binding permease protein                                                    | lipid A export ATP-bindingpermease protein [Haemophilus somnus str. 129PT]                                    |
| <i>T. denticola</i> | VBITreDen150577_2482 | ABC transporter 2C ATP-binding permease protein                                                    | ABC transporter ATP-binding protein MsbA [Haemophilus ducreyi str. 35000HP]                                   |
| <i>T. denticola</i> | VBITreDen150577_2483 | ABC transporter ATP-binding protein                                                                | ABC transporter ATP-bindingpermease protein [Pseudomonas syringae str. 1448A (pv. phaseolicola)]              |
| <i>T. denticola</i> | VBITreDen150577_2489 | Ornithine carbamoyltransferase EC 2.1.3.3                                                          | phaseolotoxin-insensitive ornithine carbamoyltransferase [Pseudomonas syringae str. 1448A (pv. phaseolicola)] |
| <i>T. denticola</i> | VBITreDen150577_2496 | RNA polymerase sigma factor RpoD                                                                   | sigma factor MysA [Mycobacterium smegmatis str. MC2 155]                                                      |
| <i>T. denticola</i> | VBITreDen150577_2507 | Enolase EC 4.2.1.11                                                                                | phosphopyruvate hydratase [Streptococcus pneumoniae str. TIGR4 (serotype 4)]                                  |
| <i>T. denticola</i> | VBITreDen150577_2549 | Oligopeptide transport ATP-binding protein OppF TC 3.A.1.5.1                                       | oligopeptide ABC transporter permease component [Mycoplasma mycoides str. PG1]                                |
| <i>T. denticola</i> | VBITreDen150577_2564 | Flagellin protein FlaA                                                                             | flagellin FlIC [Pseudomonas fluorescens str. Pf-5]                                                            |
| <i>T. denticola</i> | VBITreDen150577_2566 | Flagellar basal-body rod protein FlgF                                                              | flagellar basal body rod protein FlgG [Helicobacter pylori str. Shi470]                                       |
| <i>T. denticola</i> | VBITreDen150577_2567 | Flagellar basal-body rod protein FlgG                                                              | flagellar distal rod protein FlgG [Helicobacter hepaticus str. ATCC 51449]                                    |
| <i>T. denticola</i> | VBITreDen150577_2621 | ABC transporter 2C ATP-binding permease protein                                                    | ABC transporter ATP-binding protein MsbA [Haemophilus ducreyi str. 35000HP]                                   |
| <i>T. denticola</i> | VBITreDen150577_2626 | Oligopeptide transport ATP-binding protein OppF TC 3.A.1.5.1                                       | oligopeptide ABC transporter permease component [Mycoplasma mycoides str. PG1]                                |
| <i>T. denticola</i> | VBITreDen150577_2627 | Oligopeptide transport ATP-binding protein OppD TC 3.A.1.5.1                                       | oligopeptide ABC transporter permease component [Mycoplasma mycoides str. PG1]                                |
| <i>T. denticola</i> | VBITreDen150577_2635 | Dipeptide transport ATP-binding protein DppF TC 3.A.1.5.2                                          | oligopeptide ABC transporter permease component [Mycoplasma mycoides str. PG1]                                |
| <i>T. denticola</i> | VBITreDen150577_2662 | hypothetical protein                                                                               | ABC transporter related [Haemophilus somnus str. 2336]                                                        |
| <i>T. denticola</i> | VBITreDen150577_2665 | Lipid A export ATP-binding permease protein MsbA                                                   | lipid A ABC exporter fused ATPase and inner membrane subunits MsbA [Haemophilus somnus str. 2336]             |
| <i>T. denticola</i> | VBITreDen150577_2699 | Heat shock protein 60 family chaperone GroEL                                                       | chaperonin GroEL [Clostridium perfringens str. 13]                                                            |
| <i>T. denticola</i> | VBITreDen150577_2701 | Hypothetical radical SAM family enzyme 2C NOT coproporphyrinogen III oxidase 2C oxygen-independent | putative oxygen independent coproporphyrinogen III oxidase [Escherichia coli str. 536 (UPEC)]                 |
| <i>T. denticola</i> | VBITreDen150577_2703 | iron compound ABC transporter                                                                      | ferric enterobactin transport ATP-binding protein FepC [Mycobacterium smegmatis str. MC2 155]                 |
| <i>T. denticola</i> | VBITreDen150577_2704 | Ferrichrome transport system permease protein FhuB TC 3.A.1.14.3                                   | putative permease of iron compound ABC transport system [Shigella dysenteriae str. 197 (serotype 1)]          |
| <i>T. denticola</i> | VBITreDen445_0030    | ABC transporter 2C ATP-binding protein                                                             | ABC transporter related [Yersinia pseudotuberculosis str. PB1+ (serotype IB)]                                 |
| <i>T. denticola</i> | VBITreDen445_0035    | DNA-binding response regulator                                                                     | DNA-binding response regulator LytTr family [Clostridium perfringens str. ATCC 13124]                         |
| <i>T. denticola</i> | VBITreDen445_0040    | 3-oxoacyl-acyl-carrier-protein synthase 2C KASII EC 2.3.1.41                                       | 3-oxoacyl-(acyl carrier protein) synthase II [Mycobacterium sp. str. JDM601]                                  |
| <i>T. denticola</i> | VBITreDen445_0042    | Acyl-coenzyme A synthetases AMP-fatty acid ligases                                                 | pyochelin biosynthesis protein PchD [Pseudomonas aeruginosa str. PA7]                                         |

Supplementary Table S7. Up-regulated putative virulence factors of the 'red-complex' in disease. These virulence factors were identified bibliographically or by BLAST alignment to the VFDB as described in the methods section. In red are proteins with potential protease or peptidase activities. In green are proteins probably involved in iron metabolism.

|                     |                   |                                                                                 |                                                                                                                                                 |
|---------------------|-------------------|---------------------------------------------------------------------------------|-------------------------------------------------------------------------------------------------------------------------------------------------|
| <i>T. denticola</i> | VBITreDen445_0056 | Flagellar biosynthesis protein FlhB                                             | flagellar biosynthetic protein FlhB [Campylobacter jejuni str. RM1221]                                                                          |
| <i>T. denticola</i> | VBITreDen445_0057 | Flagellar biosynthesis protein FlhA                                             | flagellar biosynthesis protein [Bordetella avium str. 197N]                                                                                     |
| <i>T. denticola</i> | VBITreDen445_0239 | Lipid A export ATP-binding permease protein MsbA                                | ABC transporter ATP-bindingpermease protein [Pseudomonas syringae str. 1448A (pv. phaseolicola)]                                                |
| <i>T. denticola</i> | VBITreDen445_0240 | transporter                                                                     | ABC transporter ATP-bindingpermease protein [Pseudomonas syringae str. DC3000 (pv. tomato)]                                                     |
| <i>T. denticola</i> | VBITreDen445_0264 | Transport ATP-binding protein CydC                                              | ABC transporter ATP-bindingpermease protein [Pseudomonas syringae str. 1448A (pv. phaseolicola)]                                                |
| <i>T. denticola</i> | VBITreDen445_0266 | ABC-type multidrug transport system 2C ATPase and permease components           | ABC transporter ATP-bindingpermease protein [Pseudomonas syringae str. DC3000 (pv. tomato)]                                                     |
| <i>T. denticola</i> | VBITreDen445_0304 | ABC transporter 2C ATP-binding protein                                          | putative ABC transporter protein [Escherichia coli str. UT189 (UPEC)]                                                                           |
| <i>T. denticola</i> | VBITreDen445_0309 | hypothetical protein                                                            | transporter HlyCCorC family [Clostridium botulinum str. Okra (serotype B1)]                                                                     |
| <i>T. denticola</i> | VBITreDen445_0310 | hypothetical protein                                                            | transporter HlyCCorC family [Clostridium botulinum str. Langeland (serotype F)]                                                                 |
| <i>T. denticola</i> | VBITreDen445_0336 | methyl-accepting chemotaxis protein                                             | accessory colonization factor AcfB [Vibrio cholerae str. O395 chromosome II]                                                                    |
| <i>T. denticola</i> | VBITreDen445_0348 | ABC transporter 2C ATP-binding permease protein                                 | fused lipid transporter subunits of ABC superfamily: membrane componentATP-binding component [Haemophilus influenzae str. PittEE (nontypeable)] |
| <i>T. denticola</i> | VBITreDen445_0349 | ABC transporter 2C ATP-binding permease protein                                 | lipid A export ATP-binding protein MsbA [Haemophilus influenzae str. 86-028NP (nontypeable)]                                                    |
| <i>T. denticola</i> | VBITreDen445_0573 | internalin-related protein                                                      | hypothetical protein [Listeria monocytogenes str. EGD-e (serovar 12a)]                                                                          |
| <i>T. denticola</i> | VBITreDen445_0573 | internalin-related protein                                                      | hypothetical protein [Listeria monocytogenes str. EGD-e (serovar 12a)]                                                                          |
| <i>T. denticola</i> | VBITreDen445_0573 | internalin-related protein                                                      | hypothetical protein [Listeria monocytogenes str. EGD-e (serovar 12a)]                                                                          |
| <i>T. denticola</i> | VBITreDen445_0573 | internalin-related protein                                                      | hypothetical protein [Listeria monocytogenes str. EGD-e (serovar 12a)]                                                                          |
| <i>T. denticola</i> | VBITreDen445_0573 | internalin-related protein                                                      | hypothetical protein [Listeria monocytogenes str. EGD-e (serovar 12a)]                                                                          |
| <i>T. denticola</i> | VBITreDen445_0578 | 3-oxoacyl-acyl-carrier protein reductase EC 1.1.1.100                           | cylG protein [Streptococcus agalactiae str. A909 (serotype Ia)]                                                                                 |
| <i>T. denticola</i> | VBITreDen445_0603 | ABC transporter 2C ATP-binding protein                                          | iron-enterobactin transporter ATP-binding protein [Shigella boydii str. CDC 3083-94 (serotype 18)]                                              |
| <i>T. denticola</i> | VBITreDen445_0626 | Chemotaxis protein methyltransferase CheR EC 2.1.1.80                           | chemotaxis methyltransferase CheR [Vibrio parahaemolyticus str. RIMD 2210633 chromosome I]                                                      |
| <i>T. denticola</i> | VBITreDen445_0627 | Chemotaxis response regulator protein-glutamate methylesterase CheB EC 3.1.1.61 | protein-glutamate methylesterase CheB [Vibrio cholerae str. O395 chromosome II]                                                                 |
| <i>T. denticola</i> | VBITreDen445_0673 | ABC-type multidrug transport system 2C ATPase component                         | daunorubicin-DIM-transport ATP-binding protein ABC transporter DrrA [Mycobacterium marinum str. M]                                              |
| <i>T. denticola</i> | VBITreDen445_0691 | capsular polysaccharide biosynthesis protein                                    | Extracellular polysaccharide biosynthesis [Streptococcus gordonii str. Challis (subst. CH1)]                                                    |
| <i>T. denticola</i> | VBITreDen445_0701 | UDP-4-amino-4-deoxy-L-arabinose--oxoglutarate aminotransferase EC 2.6.1.-       | lipopolysaccharide biosynthesis protein [Bordetella avium str. 197N]                                                                            |
| <i>T. denticola</i> | VBITreDen445_0722 | Vitamin B12 ABC transporter 2C permease component BtuC                          | putative permease of iron compound ABC transport system [Shigella dysenteriae str. 197 (serotype 1)]                                            |
| <i>T. denticola</i> | VBITreDen445_0731 | Vitamin B12 ABC transporter 2C ATPase component BtuD                            | ATP-binding component of ferric enterobactin transport [Shigella sonnei str. 046]                                                               |
| <i>T. denticola</i> | VBITreDen445_0732 | Vitamin B12 ABC transporter 2C permease component BtuC                          | putative permease of iron compound ABC transport system [Escherichia coli str. O1 (APEC)]                                                       |
| <i>T. denticola</i> | VBITreDen445_0790 | ABC transporter 2C ATP-binding permease protein                                 | ABC transporter ATP-bindingpermease protein [Pseudomonas syringae str. DC3000 (pv. tomato)]                                                     |
| <i>T. denticola</i> | VBITreDen445_0791 | ABC transporter 2C ATP-binding permease protein                                 | ABC transporter ATP-bindingpermease protein [Pseudomonas syringae str. DC3000 (pv. tomato)]                                                     |
| <i>T. denticola</i> | VBITreDen445_0867 | ABC transporter 2C ATP-binding permease protein                                 | ABC transporter ATP-bindingpermease protein [Pseudomonas syringae str. DC3000 (pv. tomato)]                                                     |
| <i>T. denticola</i> | VBITreDen445_0868 | ABC transporter ATP-binding protein                                             | ABC transporter ATP-bindingpermease protein [Pseudomonas syringae str. 1448A (pv. phaseolicola)]                                                |
| <i>T. denticola</i> | VBITreDen445_0879 | ABC transporter 2C ATP-binding permease protein                                 | lipoprotein inner membrane ABC-transporter [Yersinia pestis str. CO92 (biovar Orientalis)]                                                      |

Supplementary Table S7. Up-regulated putative virulence factors of the 'red-complex' in disease. These virulence factors were identified bibliographically or by BLAST alignment to the VFDB as described in the methods section. In red are proteins with potential protease or peptidase activities. In green are proteins probably involved in iron metabolism.

|                     |                   |                                                                                                    |                                                                                                               |
|---------------------|-------------------|----------------------------------------------------------------------------------------------------|---------------------------------------------------------------------------------------------------------------|
| <i>T. denticola</i> | VBITreDen445_0886 | ABC transporter 2C ATP-binding permease protein                                                    | ABC transporter related [Yersinia pseudotuberculosis str. PB1+ (serotype IB)]                                 |
| <i>T. denticola</i> | VBITreDen445_0889 | ABC transporter 2C ATP-binding permease protein                                                    | lipid A export ATP-binding permease protein [Haemophilus somnus str. 129PT]                                   |
| <i>T. denticola</i> | VBITreDen445_0890 | ABC transporter 2C ATP-binding permease protein                                                    | ABC transporter ATP-binding protein MsbA [Haemophilus ducreyi str. 35000HP]                                   |
| <i>T. denticola</i> | VBITreDen445_0891 | ABC transporter ATP-binding protein                                                                | ABC transporter ATP-binding permease protein [Pseudomonas syringae str. 1448A (pv. phaseolicola)]             |
| <i>T. denticola</i> | VBITreDen445_0892 | ABC transporter ATP-binding protein                                                                | lipoprotein inner membrane ABC-transporter [Yersinia pestis str. CO92 (biovar Orientalis)]                    |
| <i>T. denticola</i> | VBITreDen445_0897 | Ornithine carbamoyltransferase EC 2.1.3.3                                                          | phaseolotoxin-insensitive ornithine carbamoyltransferase [Pseudomonas syringae str. 1448A (pv. phaseolicola)] |
| <i>T. denticola</i> | VBITreDen445_0903 | RNA polymerase sigma factor RpoD                                                                   | sigma factor MysA [Mycobacterium smegmatis str. MC2 155]                                                      |
| <i>T. denticola</i> | VBITreDen445_0948 | Oligopeptide transport ATP-binding protein OppD TC 3.A.1.5.1                                       | oligopeptide ABC transporter permease component [Mycoplasma mycoides str. PG1]                                |
| <i>T. denticola</i> | VBITreDen445_0964 | Flagellin protein FlaA                                                                             | flagellin FlIC [Pseudomonas fluorescens str. Pf-5]                                                            |
| <i>T. denticola</i> | VBITreDen445_0967 | Flagellar basal-body rod protein FlgG                                                              | flagellar distal rod protein FlgG [Helicobacter hepaticus str. ATCC 51449]                                    |
| <i>T. denticola</i> | VBITreDen445_1022 | ABC transporter 2C ATP-binding permease protein                                                    | ABC transporter ATP-binding protein MsbA [Haemophilus ducreyi str. 35000HP]                                   |
| <i>T. denticola</i> | VBITreDen445_1027 | Oligopeptide transport ATP-binding protein OppF TC 3.A.1.5.1                                       | oligopeptide ABC transporter permease component [Mycoplasma mycoides str. PG1]                                |
| <i>T. denticola</i> | VBITreDen445_1028 | Oligopeptide transport ATP-binding protein OppD TC 3.A.1.5.1                                       | oligopeptide ABC transporter permease component [Mycoplasma mycoides str. PG1]                                |
| <i>T. denticola</i> | VBITreDen445_1036 | Dipeptide transport ATP-binding protein DppF TC 3.A.1.5.2                                          | oligopeptide ABC transporter permease component [Mycoplasma mycoides str. PG1]                                |
| <i>T. denticola</i> | VBITreDen445_1133 | Heat shock protein 60 family chaperone GroEL                                                       | chaperonin GroEL [Clostridium perfringens str. 13]                                                            |
| <i>T. denticola</i> | VBITreDen445_1134 | Hypothetical radical SAM family enzyme 2C NOT coproporphyrinogen III oxidase 2C oxygen-independent | putative oxygen independent coproporphyrinogen III oxidase [Escherichia coli str. 536 (UPEC)]                 |
| <i>T. denticola</i> | VBITreDen445_1137 | Ferrichrome transport system permease protein FhuB TC 3.A.1.14.3                                   | putative permease of iron compound ABC transport system [Shigella dysenteriae str. 197 (serotype 1)]          |
| <i>T. denticola</i> | VBITreDen445_1168 | Flagellar basal-body rod protein FlgC                                                              | flagellar basal body rod protein FlgC [Helicobacter pylori str. P12]                                          |
| <i>T. denticola</i> | VBITreDen445_1171 | Flagellar motor switch protein FlIG                                                                | flagellar motor protein [Pseudomonas fluorescens str. Pf0-1]                                                  |
| <i>T. denticola</i> | VBITreDen445_1173 | Flagellum-specific ATP synthase FlII                                                               | type III secretion system ATPase [Bordetella pertussis str. Tohama I]                                         |
| <i>T. denticola</i> | VBITreDen445_1195 | Magnesium and cobalt efflux protein CorC                                                           | transporter HlyCCorC family [Clostridium botulinum str. Okra (serotype B1)]                                   |
| <i>T. denticola</i> | VBITreDen445_1212 | Cholinephosphate cytidyltransferase EC 2.7.7.15 Choline kinase EC 2.7.1.32                         | lic-1 operon protein [Haemophilus influenzae str. PittEE (nontypeable)]                                       |
| <i>T. denticola</i> | VBITreDen445_1223 | Oligopeptide transport ATP-binding protein OppD TC 3.A.1.5.1                                       | ABC transporter related [Haemophilus somnus str. 2336]                                                        |
| <i>T. denticola</i> | VBITreDen445_1235 | Flagellar motor switch protein FlIG                                                                | flagellar motor switch protein FlIG [Pseudomonas mendocina str. ymp]                                          |
| <i>T. denticola</i> | VBITreDen445_1283 | Probable polybeta-D-mannuronate O-acetylase EC 2.3.1.-                                             | membrane bound O-acyl transferase MBOAT family protein [Pseudomonas mendocina str. ymp]                       |
| <i>T. denticola</i> | VBITreDen445_1291 | FIG01187002 hypothetical protein                                                                   | protease Do [Pseudomonas putida str. GB-1]                                                                    |
| <i>T. denticola</i> | VBITreDen445_1294 | RNA polymerase sigma factor RpoD                                                                   | sigma factor MysA [Mycobacterium smegmatis str. MC2 155]                                                      |
| <i>T. denticola</i> | VBITreDen445_1355 | Phosphoenolpyruvate phosphomutase EC 5.4.2.9                                                       | hypothetical protein [Campylobacter jejuni str. 81116 (NCTC11828)]                                            |
| <i>T. denticola</i> | VBITreDen445_1356 | Phosphonopyruvate decarboxylase EC 4.1.1.82                                                        | hypothetical protein [Campylobacter jejuni str. 81116 (NCTC11828)]                                            |
| <i>T. denticola</i> | VBITreDen445_1359 | ABC transporter 2C ATP-binding protein                                                             | polysaccharide ABC transporter ATP-binding protein [Streptococcus thermophilus str. CNRZ1066 (nonpathogenic)] |
| <i>T. denticola</i> | VBITreDen445_1367 | aminotransferase 2C DegT DnrJ EryC1 StrS family                                                    | hypothetical protein [Campylobacter jejuni str. 81116 (NCTC11828)]                                            |
| <i>T. denticola</i> | VBITreDen445_1374 | glycosyltransferase                                                                                | lipooligosaccharide biosynthesis galactosyltransferase putative [Campylobacter jejuni str. RM1221]            |
| <i>T. denticola</i> | VBITreDen445_1380 | UDP-glucose 4-epimerase EC 5.1.3.2                                                                 | NAD-dependent epimerasedehydratase [Yersinia pseudotuberculosis str. YPIII (serotype O:3)]                    |
| <i>T. denticola</i> | VBITreDen445_1382 | dTDP-glucose 4 2C6-dehydratase EC 4.2.1.46                                                         | dTDP-glucose 4 6-dehydratase [Vibrio fischeri str. ES114 chromosome I]                                        |

Supplementary Table S7. Up-regulated putative virulence factors of the 'red-complex' in disease. These virulence factors were identified bibliographically or by BLAST alignment to the VFDB as described in the methods section. In red are proteins with potential protease or peptidase activities. In green are proteins probably involved in iron metabolism.

|                     |                   |                                                                                            |                                                                                                             |
|---------------------|-------------------|--------------------------------------------------------------------------------------------|-------------------------------------------------------------------------------------------------------------|
| <i>T. denticola</i> | VBITreDen445_1415 | Flagellin protein FlaA                                                                     | flagellin FlIC [Pseudomonas fluorescens str. Pf-5]                                                          |
| <i>T. denticola</i> | VBITreDen445_1416 | Flagellin protein FlaA                                                                     | flagellin FlIC [Pseudomonas fluorescens str. Pf-5]                                                          |
| <i>T. denticola</i> | VBITreDen445_1427 | NAD-dependent glyceraldehyde-3-phosphate dehydrogenase EC 1.2.1.12                         | glyceraldehyde-3-phosphate dehydrogenase [Streptococcus pneumoniae str. CGSP14 (serotype 14)]               |
| <i>T. denticola</i> | VBITreDen445_1433 | Chemotaxis regulator - transmits chemoreceptor signals to flagellar motor components CheY  | Chemotaxis response regulator CheY [Listeria welshimeri str. SLCC5334 (serovar 6b)]                         |
| <i>T. denticola</i> | VBITreDen445_1455 | ABC transporter 2C ATP-binding protein 2C putative                                         | iron-uptake permease ATP-binding protein [Neisseria meningitidis str. Z2491 (serogroup A)]                  |
| <i>T. denticola</i> | VBITreDen445_1480 | mannosyltransferase 2C putative                                                            | Mannosyltransferase [Brucella suis str. ATCC 23445 chromosome I]                                            |
| <i>T. denticola</i> | VBITreDen445_1597 | Cell division trigger factor EC 5.2.1.8                                                    | trigger factor [Streptococcus agalactiae str. A909 (serotype Ia)]                                           |
| <i>T. denticola</i> | VBITreDen445_1609 | V-type ATP synthase subunit B EC 3.6.3.14                                                  | type III secretion system ATPase [Vibrio parahaemolyticus str. RIMD 2210633 chromosome I]                   |
| <i>T. denticola</i> | VBITreDen445_1610 | V-type ATP synthase subunit A EC 3.6.3.14                                                  | ATP synthase (predicted TTSS protein) [Chlamydia trachomatis str. 434Bu (serovar L2)]                       |
| <i>T. denticola</i> | VBITreDen445_1616 | ABC transporter 2C ATP-binding protein                                                     | daunorubicin resistance ABC transporter ATPase subunit [Mycobacterium vanbaalenii str. PYR-1]               |
| <i>T. denticola</i> | VBITreDen445_1676 | UDP-glucose 4-epimerase EC 5.1.3.2                                                         | UDP-glucose 4-epimerase [Bacillus cereus str. ATCC 10987]                                                   |
| <i>T. denticola</i> | VBITreDen445_1757 | ABC transporter ATP-binding protein                                                        | iron(III) ABC transporter ATP-binding protein [Haemophilus influenzae str. Rd KW20 (serotype d)]            |
| <i>T. denticola</i> | VBITreDen445_1797 | Protein export cytoplasm protein SecA ATPase RNA helicase TC 3.A.5.1.1                     | translocase [Mycobacterium avium str. K-10 (subsp. paratuberculosis)]                                       |
| <i>T. denticola</i> | VBITreDen445_1861 | Response regulator of zinc sigma-54-dependent two-component system                         | putative two-component system response regulator [Pseudomonas fluorescens str. SBW25]                       |
| <i>T. denticola</i> | VBITreDen445_1862 | Chemotaxis regulator - transmits chemoreceptor signals to flagellar motor components CheY  | flagellar regulatory protein B [Vibrio cholerae str. O395 chromosome II]                                    |
| <i>T. denticola</i> | VBITreDen445_1895 | Transport ATP-binding protein CydD                                                         | ABC transporter ATP-binding permease protein [Pseudomonas syringae str. DC3000 (pv. tomato)]                |
| <i>T. denticola</i> | VBITreDen445_1896 | Transport ATP-binding protein CydC                                                         | ABC transporter ATP-binding permease protein [Pseudomonas syringae str. DC3000 (pv. tomato)]                |
| <i>T. denticola</i> | VBITreDen445_1921 | ClpB protein                                                                               | type VI secretion ATPase ClpV1 family [Pseudomonas putida str. GB-1]                                        |
| <i>T. denticola</i> | VBITreDen445_1935 | Oligopeptide ABC transporter 2C periplasmic oligopeptide-binding protein OppA TC 3.A.1.5.1 | oligopeptide ABC transporter oligopeptide-binding protein [Listeria monocytogenes str. F2365 (serovar 4b)]  |
| <i>T. denticola</i> | VBITreDen445_1964 | sigma54 specific transcriptional regulator 2C Fis family                                   | putative two-component system response regulator [Pseudomonas fluorescens str. SBW25]                       |
| <i>T. denticola</i> | VBITreDen445_2007 | ATP-dependent Clp protease ATP-binding subunit ClpA                                        | clpB protein [Vibrio cholerae str. O395 chromosome I]                                                       |
| <i>T. denticola</i> | VBITreDen445_2071 | 2-amino-3-ketobutyrate coenzyme A ligase EC 2.3.1.29                                       | aminotransferase class II [Vibrio cholerae str. O395 chromosome I]                                          |
| <i>T. denticola</i> | VBITreDen445_2102 | Zinc ABC transporter 2C periplasmic-binding protein ZnuA                                   | putative laminin adhesion [Streptococcus pyogenes str. SSI-1 (serotype M3)]                                 |
| <i>T. denticola</i> | VBITreDen445_2109 | Vitamin B12 ABC transporter 2C permease component BtuC                                     | putative hemin permease [Escherichia coli str. Sakai (EHEC O157:H7)]                                        |
| <i>T. denticola</i> | VBITreDen445_2136 | ABC transporter 2C ATP-binding permease protein                                            | lipid A export ATP-binding permease protein [Haemophilus somnus str. 129PT]                                 |
| <i>T. denticola</i> | VBITreDen445_2157 | FKBP-type peptidyl-prolyl cis-trans isomerase FkpA precursor EC 5.2.1.8                    | macrophage infectivity potentiator (Mip) [Legionella pneumophila str. Philadelphia 1]                       |
| <i>T. denticola</i> | VBITreDen445_2170 | Outer membrane stress sensor protease DegS                                                 | protease Do [Pseudomonas putida str. F1]                                                                    |
| <i>T. denticola</i> | VBITreDen445_2179 | sigma-54 dependent transcriptional regulator 2C putative                                   | flagellar regulator FleQ [Pseudomonas syringae str. 1448A (pv. phaseolicola)]                               |
| <i>T. denticola</i> | VBITreDen445_2196 | ClpB protein                                                                               | type VI secretion ATPase ClpV1 family [Pseudomonas putida str. W619]                                        |
| <i>T. denticola</i> | VBITreDen445_2209 | Membrane-associated zinc metalloprotease                                                   | putative membrane-associated zinc metalloprotease [Pseudomonas aeruginosa str. UCBPP-PA14]                  |
| <i>T. denticola</i> | VBITreDen445_2212 | Undecaprenyl diphosphate synthase EC 2.5.1.31                                              | undecaprenyl diphosphate synthase [Enterococcus faecalis str. V583]                                         |
| <i>T. denticola</i> | VBITreDen445_2220 | Flagellar hook-associated protein FlgK                                                     | flagellar hook-associated protein FlgK [Campylobacter fetus str. 82-40 (subsp. fetus)]                      |
| <i>T. denticola</i> | VBITreDen445_2225 | ABC-type Fe3+-siderophore transport system 2C permease component                           | cobalaminFe3+-siderophores transport system permease component [Corynebacterium glutamicum str. ATCC 13032] |

Supplementary Table S7. Up-regulated putative virulence factors of the 'red-complex' in disease. These virulence factors were identified bibliographically or by BLAST alignment to the VFDB as described in the methods section. In red are proteins with potential protease or peptidase activities. In green are proteins probably involved in iron metabolism.

|                     |                   |                                                                                            |                                                                                                              |
|---------------------|-------------------|--------------------------------------------------------------------------------------------|--------------------------------------------------------------------------------------------------------------|
| <i>T. denticola</i> | VBITreDen445_2231 | Branched-chain amino acid transport ATP-binding protein LivF TC 3.A.1.4.1                  | (Bielefeld)<br>daunorubicin resistance ABC transporter ATP-binding subunit [Mycobacterium sp. str. MCS]      |
| <i>T. denticola</i> | VBITreDen445_2369 | Signal transduction histidine kinase                                                       | multi-sensor hybrid histidine kinase [Pseudomonas mendocina str. ymp]                                        |
| <i>T. denticola</i> | VBITreDen445_2386 | ABC transporter 2C ATP-binding protein                                                     | RtxB protein [Vibrio cholerae str. O395 chromosome II]                                                       |
| <i>T. denticola</i> | VBITreDen445_2388 | ABC transporter 2C ATP-binding protein                                                     | putative ABC transporter protein [Escherichia coli str. UT189 (UPEC)]                                        |
| <i>T. denticola</i> | VBITreDen445_2412 | ABC transporter related                                                                    | ABC-type bacteriocin/antibiotic exporter [Vibrio vulnificus str. CMCP6 chromosome II]                        |
| <i>T. denticola</i> | VBITreDen445_2417 | ABC transporter ATP-binding protein                                                        | lipoprotein inner membrane ABC-transporter [Yersinia pestis str. CO92 (biovar Orientalis)]                   |
| <i>T. denticola</i> | VBITreDen445_2432 | Glucose-6-phosphate isomerase EC 5.3.1.9                                                   | glucose-6-phosphate isomerase [Haemophilus influenzae str. Rd KW20 (serotype d)]                             |
| <i>T. denticola</i> | VBITreDen445_2451 | Response regulator of zinc sigma-54-dependent two-component system                         | two-component response regulator PilR [Pseudomonas aeruginosa str. UCBPP-PA14]                               |
| <i>T. denticola</i> | VBITreDen445_2459 | Outer membrane protein assembly factor YaeT precursor                                      | surface antigen/outer membrane protein OMP85 family [Bartonella bacilliformis str. KC583ATCC 35685]          |
| <i>T. denticola</i> | VBITreDen445_2483 | Transport ATP-binding protein CydD                                                         | ABC transporter ATP-binding/permease protein [Pseudomonas syringae str. DC3000 (pv. tomato)]                 |
| <i>T. denticola</i> | VBITreDen445_2502 | Lipoate-protein ligase A                                                                   | lipoyltransferase and lipoate-protein ligase family protein [Listeria monocytogenes str. F2365 (serovar 4b)] |
| <i>T. denticola</i> | VBITreDen445_2535 | RNA polymerase sigma factor SigB                                                           | RNA polymerase sigma factor for flagellar operon [Yersinia enterocolitica str. 8081 (biotype 1B)]            |
| <i>T. denticola</i> | VBITreDen445_2537 | Flagellar synthesis regulator FleN                                                         | ParA family protein [Vibrio cholerae str. O395 chromosome II]                                                |
| <i>T. denticola</i> | VBITreDen445_2538 | Flagellar biosynthesis protein FlhF                                                        | flagellar biosynthesis protein [Campylobacter jejuni str. 81116 (NCTC11828)]                                 |
| <i>T. denticola</i> | VBITreDen445_2601 | Oligopeptide ABC transporter 2C periplasmic oligopeptide-binding protein OppA TC 3.A.1.5.1 | oligopeptide ABC transporter oligopeptide-binding protein [Listeria monocytogenes str. HCC23 (serotype 4a)]  |
| <i>T. denticola</i> | VBITreDen445_2607 | Flagellar motor switch protein FlIM                                                        | hypothetical protein [Helicobacter acinonychis str. Sheeba]                                                  |
| <i>T. denticola</i> | VBITreDen445_2609 | Flagellar motor rotation protein MotB                                                      | OmpAMotB domain protein [Pseudomonas mendocina str. ymp]                                                     |
| <i>T. denticola</i> | VBITreDen445_2610 | Flagellar motor rotation protein MotA                                                      | flagellar motor protein [Vibrio parahaemolyticus str. RIMD 2210633 chromosome I]                             |
| <i>T. denticola</i> | VBITreDen445_2612 | Flagellar hook protein FlgE                                                                | flagellar hook protein [Pseudomonas aeruginosa str. PA7]                                                     |
| <i>T. denticola</i> | VBITreDen445_2626 | methyl-accepting chemotaxis protein                                                        | accessory colonization factor AcfB [Vibrio cholerae str. O395 chromosome II]                                 |
