# Supplementary material
Source: PubMed Central journal article supplement (PMC4817619)
Supplement: ismej201423x10.pdf [file ismej201423x10.pdf]

**Supplementary Table S8.** Over-represented putative virulence factors in disease.

These virulence factors were identified bibliographically or by BLAST alignment to the VFDB as described in the methods section.

In green genes involved in iron metabolism. In red genes involved in lipopolysaccharide synthesis.

| Species                    | Locus ID             | Annotation (PATRIC,HOMD,JCVI)                                                                      |
|----------------------------|----------------------|----------------------------------------------------------------------------------------------------|
| Abiotrophia defectiva      | VBIAbiDef30295_0024  | acetyl-CoA synthetase, AMP-forming-related, Acs                                                    |
| Abiotrophia defectiva      | VBIAbiDef30295_0039  | cation transport ATPase, HAD family                                                                |
| Abiotrophia defectiva      | VBIAbiDef30295_2952  | CheA signal transduction histidine kinase                                                          |
| Abiotrophia defectiva      | VBIAbiDef30295_1494  | dTDP-4-dehydrorhamnose 3,5-epimerase                                                               |
| Abiotrophia defectiva      | VBIAbiDef30295_2882  | flagellar motor switch protein FlIN                                                                |
| Abiotrophia defectiva      | VBIAbiDef30295_2632  | flagelline                                                                                         |
| Abiotrophia defectiva      | VBIAbiDef30295_2609  | glycosyltransferase CDP- glycerolpolyglycerophosphate glycerophosphotransferase, GT2 family        |
| Abiotrophia defectiva      | VBIAbiDef30295_1027  | hemolysin-related protein, transporter-associated family, TlyC                                     |
| Abiotrophia defectiva      | VBIAbiDef30295_1743  | histidinol-phosphate aminotransferase, HisC                                                        |
| Abiotrophia defectiva      | VBIAbiDef30295_0860  | nitrate sulfonate bicarbonate ABC transporter, ATPase component                                    |
| Abiotrophia defectiva      | VBIAbiDef30295_1578  | predicted CDP-glycerolpolyglycerophosphate glycerophosphotransferase                               |
| Abiotrophia defectiva      | VBIAbiDef30295_2951  | RNA polymerase sigma 28 subunit FlIA/WhiG                                                          |
| Abiotrophia defectiva      | VBIAbiDef30295_1258  | UDP-N-acetyl-D-mannosaminuronate dehydrogenase                                                     |
| Abiotrophia defectiva      | VBIAbiDef30295_2836  | V-type ATP synthase subunit beta                                                                   |
| Achromobacter xylosoxidans | VBIAchXyl160325_4698 | ABC transporter ATP-binding protein/permease                                                       |
| Achromobacter xylosoxidans | VBIAchXyl160325_4554 | elongation factor Tu                                                                               |
| Achromobacter xylosoxidans | VBIAchXyl160325_1461 | flagellar motor switch protein FlIM                                                                |
| Achromobacter xylosoxidans | VBIAchXyl187661_2810 | hypothetical protein                                                                               |
| Achromobacter xylosoxidans | VBIAchXyl187661_2953 | hypothetical protein                                                                               |
| Achromobacter xylosoxidans | VBIAchXyl160325_5686 | methyl-accepting chemotaxis protein DmcA                                                           |
| Achromobacter xylosoxidans | VBIAchXyl160325_2599 | MotA/TolQ/ExbB proton channel                                                                      |
| Achromobacter xylosoxidans | VBIAchXyl160325_3017 | NADPH-dependent butanol dehydrogenase                                                              |
| Achromobacter xylosoxidans | VBIAchXyl187661_0417 | peptide ABC transporter ATPase                                                                     |
| Achromobacter xylosoxidans | VBIAchXyl160325_2317 | RecName: Full=Flagellar filament 30.7 kDa core protein; AltName:sFull=Flagellin subunit protein B3 |
| Acinetobacter baumannii    | VBIACiBau103176_0457 | conserved domain protein                                                                           |
| Acinetobacter baumannii    | VBIACiBau42682_0320  | glycerol kinase                                                                                    |
| Acinetobacter baumannii    | VBIACiBau3967_3195   | glycerol kinase                                                                                    |
| Acinetobacter baumannii    | VBIACiBau42682_1776  | glycosyltransferase, group 2 family protein                                                        |
| Acinetobacter baumannii    | VBIACiBau3967_2975   | hypothetical protein                                                                               |
| Acinetobacter baumannii    | VBIACiBau88365_3152  | hypothetical protein                                                                               |
| Acinetobacter baumannii    | VBIACiBau88365_2207  | hypothetical protein                                                                               |
| Acinetobacter baumannii    | VBIACiBau42682_1207  | hypothetical protein                                                                               |
| Acinetobacter baumannii    | VBIACiBau103176_1120 | hypothetical protein                                                                               |
| Acinetobacter baumannii    | VBIACiBau71211_2580  | hypothetical protein                                                                               |
| Acinetobacter baumannii    | VBIACiBau42682_0137  | hypothetical protein                                                                               |
| Acinetobacter baumannii    | VBIACiBau42682_2615  | hypothetical protein                                                                               |
| Acinetobacter baumannii    | VBIACiBau88365_2386  | hypothetical protein                                                                               |
| Acinetobacter baumannii    | VBIACiBau42682_1105  | hypothetical protein                                                                               |
| Acinetobacter baumannii    | VBIACiBau3967_1642   | hypothetical protein                                                                               |
| Acinetobacter baumannii    | VBIACiBau42682_2880  | hypothetical protein                                                                               |
| Acinetobacter baumannii    | VBIACiBau69881_3062  | hypothetical protein                                                                               |
| Acinetobacter baumannii    | VBIACiBau71211_0046  | hypothetical protein                                                                               |
| Acinetobacter baumannii    | VBIACiBau103538_1211 | hypothetical protein                                                                               |
| Acinetobacter baumannii    | VBIACiBau42682_3074  | hypothetical protein                                                                               |
| Acinetobacter baumannii    | VBIACiBau88365_2993  | hypothetical protein                                                                               |
| Acinetobacter baumannii    | VBIACiBau88365_2135  | hypothetical protein                                                                               |
| Acinetobacter baumannii    | VBIACiBau103176_0648 | hypothetical protein                                                                               |
| Acinetobacter baumannii    | VBIACiBau103538_3153 | hypothetical protein                                                                               |
| Acinetobacter baumannii    | VBIACiBau103176_0760 | hypothetical protein                                                                               |
| Acinetobacter baumannii    | VBIACiBau103176_1389 | hypothetical protein                                                                               |
| Acinetobacter baumannii    | VBIACiBau42682_3330  | hypothetical protein                                                                               |
| Acinetobacter baumannii    | VBIACiBau88365_0124  | hypothetical protein                                                                               |
| Acinetobacter baumannii    | VBIACiBau88365_0107  | hypothetical protein                                                                               |
| Acinetobacter baumannii    | VBIACiBau71211_0869  | hypothetical protein                                                                               |
| Acinetobacter baumannii    | VBIACiBau3967_2061   | hypothetical protein                                                                               |
| Acinetobacter baumannii    | VBIACiBau88365_0111  | hypothetical protein                                                                               |
| Acinetobacter baumannii    | VBIACiBau71211_1767  | hypothetical protein                                                                               |
| Acinetobacter baumannii    | VBIACiBau103538_2006 | hypothetical protein                                                                               |
| Acinetobacter baumannii    | VBIACiBau88365_1615  | hypothetical protein                                                                               |
| Acinetobacter baumannii    | VBIACiBau42682_3325  | hypothetical protein                                                                               |
| Acinetobacter baumannii    | VBIACiBau103538_2076 | hypothetical protein                                                                               |
| Acinetobacter baumannii    | VBIACiBau3967_0795   | hypothetical protein                                                                               |
| Acinetobacter baumannii    | VBIACiBau42682_2154  | hypothetical protein                                                                               |
| Acinetobacter baumannii    | VBIACiBau42682_0274  | hypothetical protein                                                                               |
| Acinetobacter baumannii    | VBIACiBau88365_1866  | hypothetical protein                                                                               |
| Acinetobacter baumannii    | VBIACiBau103538_2010 | hypothetical protein                                                                               |
| Acinetobacter baumannii    | VBIACiBau42682_3283  | hypothetical protein                                                                               |
| Acinetobacter baumannii    | VBIACiBau88365_2299  | hypothetical protein                                                                               |
| Acinetobacter baumannii    | VBIACiBau103176_1750 | hypothetical protein                                                                               |
| Acinetobacter baumannii    | VBIACiBau103538_0901 | hypothetical protein                                                                               |
| Acinetobacter baumannii    | VBIACiBau71211_3025  | hypothetical protein                                                                               |
| Acinetobacter baumannii    | VBIACiBau71211_2428  | hypothetical protein                                                                               |

Table S8

|                           |                      |                                                                                                            |
|---------------------------|----------------------|------------------------------------------------------------------------------------------------------------|
| Acinetobacter baumannii   | VBIACiBau71211_1136  | hypothetical protein                                                                                       |
| Acinetobacter baumannii   | VBIACiBau88365_2507  | hypothetical protein                                                                                       |
| Acinetobacter baumannii   | VBIACiBau42682_3388  | hypothetical protein                                                                                       |
| Acinetobacter baumannii   | VBIACiBau42682_1079  | hypothetical protein                                                                                       |
| Acinetobacter baumannii   | VBIACiBau3967_1816   | hypothetical protein                                                                                       |
| Acinetobacter baumannii   | VBIACiBau71211_0210  | hypothetical protein                                                                                       |
| Acinetobacter baumannii   | VBIACiBau71211_3035  | hypothetical protein                                                                                       |
| Acinetobacter baumannii   | VBIACiBau103176_1026 | hypothetical protein                                                                                       |
| Acinetobacter baumannii   | VBIACiBau88365_1119  | hypothetical protein                                                                                       |
| Acinetobacter baumannii   | VBIACiBau71211_3034  | hypothetical protein                                                                                       |
| Acinetobacter baumannii   | VBIACiBau42682_3338  | hypothetical protein                                                                                       |
| Acinetobacter baumannii   | VBIACiBau88365_2193  | nicotinate phosphoribosyltransferase                                                                       |
| Acinetobacter baumannii   | VBIACiBau88365_2784  | patatin                                                                                                    |
| Acinetobacter baumannii   | VBIACiBau88365_0120  | phosphoribulokinase/uridine kinase                                                                         |
| Acinetobacter baumannii   | VBIACiBau71211_1200  | UvrABC system protein A                                                                                    |
| Actinomyces odontolyticus | VBIActOdo114913_0658 | Alcohol dehydrogenase EC 1.1.1.1 3B Acetaldehyde dehydrogenase EC 1.2.1.10                                 |
| Actinomyces odontolyticus | VBIActOdo67396_0448  | Carbonic anhydrase EC 4.2.1.1                                                                              |
| Actinomyces odontolyticus | VBIActOdo114913_1744 | CipB protein                                                                                               |
| Actinomyces odontolyticus | VBIActOdo114913_1669 | Enolase EC 4.2.1.11                                                                                        |
| Actinomyces odontolyticus | VBIActOdo114913_1846 | Enoyl-acyl-carrier-protein reductase NADPH EC 1.3.1.10                                                     |
| Actinomyces odontolyticus | VBIActOdo67396_0154  | esterase                                                                                                   |
| Actinomyces odontolyticus | VBIActOdo67396_0334  | Ferrichrome-iron receptor                                                                                  |
| Actinomyces odontolyticus | VBIActOdo67396_0640  | FIG00351208 hypothetical protein                                                                           |
| Actinomyces odontolyticus | VBIActOdo67396_0162  | FIG00354122 hypothetical protein                                                                           |
| Actinomyces odontolyticus | VBIActOdo67396_0222  | FIG00354122 hypothetical protein                                                                           |
| Actinomyces odontolyticus | VBIActOdo67396_0208  | FIG00354122 hypothetical protein                                                                           |
| Actinomyces odontolyticus | VBIActOdo67396_0228  | FIG00354122 hypothetical protein                                                                           |
| Actinomyces odontolyticus | VBIActOdo114913_0522 | flagellar motor switch protein FlIG                                                                        |
| Actinomyces odontolyticus | VBIActOdo114913_1760 | Flagellin protein FlaA                                                                                     |
| Actinomyces odontolyticus | VBIActOdo114913_1780 | Flagellin protein FlaA                                                                                     |
| Actinomyces odontolyticus | VBIActOdo114913_0770 | Flagellum-specific ATP synthase FliI                                                                       |
| Actinomyces odontolyticus | VBIActOdo67396_0909  | Gamma-glutamyltranspeptidase EC 2.3.2.2                                                                    |
| Actinomyces odontolyticus | VBIActOdo67396_0931  | GTP pyrophosphokinase EC 2.7.6.5 2C pppGpp synthetase I                                                    |
| Actinomyces odontolyticus | VBIActOdo67396_1764  | GTP pyrophosphokinase EC 2.7.6.5 2C pppGpp synthetase I                                                    |
| Actinomyces odontolyticus | VBIActOdo67396_1833  | GTP pyrophosphokinase EC 2.7.6.5 2C pppGpp synthetase I                                                    |
| Actinomyces odontolyticus | VBIActOdo67396_0449  | GTP pyrophosphokinase EC 2.7.6.5 2C pppGpp synthetase II                                                   |
| Actinomyces odontolyticus | VBIActOdo114913_1633 | Guanosine-3' 2C5'-bisdiphosphate 3'-pyrophosphohydrolyase                                                  |
| Actinomyces odontolyticus | VBIActOdo114913_0313 | Heat shock protein 60 family chaperone GroEL                                                               |
| Actinomyces odontolyticus | VBIActOdo114913_0100 | hypothetical protein                                                                                       |
| Actinomyces odontolyticus | VBIActOdo114913_0067 | hypothetical protein                                                                                       |
| Actinomyces odontolyticus | VBIActOdo114913_0356 | hypothetical protein                                                                                       |
| Actinomyces odontolyticus | VBIActOdo114913_0360 | hypothetical protein                                                                                       |
| Actinomyces odontolyticus | VBIActOdo67396_1127  | integral membrane protein                                                                                  |
| Actinomyces odontolyticus | VBIActOdo67396_1376  | Long-chain-fatty-acid--CoA ligase EC 6.2.1.3                                                               |
| Actinomyces odontolyticus | VBIActOdo67396_1034  | Long-chain-fatty-acid--CoA ligase EC 6.2.1.3                                                               |
| Actinomyces odontolyticus | VBIActOdo114913_1822 | Long-chain-fatty-acid--CoA ligase EC 6.2.1.3                                                               |
| Actinomyces odontolyticus | VBIActOdo67396_1310  | Long-chain-fatty-acid--CoA ligase EC 6.2.1.3                                                               |
| Actinomyces odontolyticus | VBIActOdo67396_0519  | Long-chain-fatty-acid--CoA ligase EC 6.2.1.3                                                               |
| Actinomyces odontolyticus | VBIActOdo67396_1863  | Membrane-bound lytic murein transglycosylase B precursor EC 3.2.1.-                                        |
| Actinomyces odontolyticus | VBIActOdo114913_1756 | Mg2+ transport ATPase 2C P-type EC 3.6.3.2                                                                 |
| Actinomyces odontolyticus | VBIActOdo114913_1809 | Multiple sugar ABC transporter 2C ATP-binding protein                                                      |
| Actinomyces odontolyticus | VBIActOdo67396_0016  | NADH-ubiquinone oxidoreductase chain G EC 1.6.5.3                                                          |
| Actinomyces odontolyticus | VBIActOdo67396_0095  | Opine oxidase subunit A EC 1.-.-.-                                                                         |
| Actinomyces odontolyticus | VBIActOdo67396_1901  | Outer membrane receptor for ferric coprogen and ferric-rhodotorulic acid                                   |
| Actinomyces odontolyticus | VBIActOdo67396_1490  | Outer membrane stress sensor protease DegS                                                                 |
| Actinomyces odontolyticus | VBIActOdo67396_0296  | Phosphomannomutase EC 5.4.2.8                                                                              |
| Actinomyces odontolyticus | VBIActOdo114913_0749 | Propionate catabolism operon regulatory protein PrpR                                                       |
| Actinomyces odontolyticus | VBIActOdo67396_0804  | Protein export cytoplasm protein SecA ATPase RNA helicase TC 3.A.5.1.1                                     |
| Actinomyces odontolyticus | VBIActOdo67396_0297  | Protein ImpG VasA                                                                                          |
| Actinomyces odontolyticus | VBIActOdo67396_0231  | Protein ImpG VasA                                                                                          |
| Actinomyces odontolyticus | VBIActOdo114913_1675 | Quinone oxidoreductase EC 1.6.5.5                                                                          |
| Actinomyces odontolyticus | VBIActOdo67396_0125  | Serine protease 2C DegP HtrA 2C do-like EC 3.4.21.-                                                        |
| Actinomyces odontolyticus | VBIActOdo67396_1892  | Thioldisulfide interchange protein DsbG precursor                                                          |
| Actinomyces odontolyticus | VBIActOdo67396_0152  | Transcriptional activator of acetoin dehydrogenase operon AcoR                                             |
| Actinomyces odontolyticus | VBIActOdo67396_0124  | Transcriptional activator of acetoin dehydrogenase operon AcoR                                             |
| Actinomyces odontolyticus | VBIActOdo114913_0681 | Transcriptional regulatory protein ompR                                                                    |
| Actinomyces odontolyticus | VBIActOdo67396_1913  | Translation elongation factor Tu                                                                           |
| Actinomyces odontolyticus | VBIActOdo67396_0535  | Twitching motility protein PilT                                                                            |
| Actinomyces odontolyticus | VBIActOdo67396_1850  | Type II secretory pathway 2C ATPase PuIE Tfp pilus assembly pathway 2C ATPase PilB                         |
| Actinomyces odontolyticus | VBIActOdo114913_0574 | Type III effector HopPmaJ                                                                                  |
| Actinomyces odontolyticus | VBIActOdo114913_1871 | Type IV fimbrial assembly protein PilC                                                                     |
| Actinomyces odontolyticus | VBIActOdo67396_0995  | UDP-2 2C3-diacylglucosamine hydrolase EC 3.6.1.-                                                           |
| Actinomyces odontolyticus | VBIActOdo67396_0702  | UDP-galactose-lipid carrier transferase EC 2.-.-.-                                                         |
| Actinomyces odontolyticus | VBIActOdo67396_1900  | Uncharacterized siderophore S biosynthesis AcsA-like protein Siderophore synthetase superfamily 2C group B |
| Actinomyces oris          | VBIActOri165140_1078 | Uncharacterized siderophore S biosynthesis AcsA-like protein Siderophore synthetase superfamily 2C group B |
| Actinomyces oris          | VBIActOri165140_1052 | ABC transporter 2C ATP-binding permease protein                                                            |
| Actinomyces oris          | VBIActOri165140_1832 | ABC-type polar amino acid transport system 2C ATPase component                                             |
| Actinomyces oris          | VBIActOri165140_0641 | Alpha-L-Rha alpha-1 2C2-L-rhamnosyltransferase alpha-L-Rha alpha-1 2C3-L-rhamnosyltransferase EC 2.4.1.-   |
| Actinomyces oris          | VBIActOri165140_0425 | Anthranilate synthase 2C aminase component EC 4.1.3.27                                                     |
|                           |                      | Arabinose 5-phosphate isomerase EC 5.3.1.13                                                                |

Table S8

|                                |                      |                                                                                                                    |
|--------------------------------|----------------------|--------------------------------------------------------------------------------------------------------------------|
| Actinomyces oris               | VBIActOri165140_1062 | ATP synthase beta chain EC 3.6.3.14                                                                                |
| Actinomyces oris               | VBIActOri165140_0276 | Capsular polysaccharide repeat unit transporter CpsL                                                               |
| Actinomyces oris               | VBIActOri165140_1634 | Choline binding protein A                                                                                          |
| Actinomyces oris               | VBIActOri165140_1141 | Choline binding protein A                                                                                          |
| Actinomyces oris               | VBIActOri165140_1862 | Choline binding protein A                                                                                          |
| Actinomyces oris               | VBIActOri165140_1492 | Choline binding protein A                                                                                          |
| Actinomyces oris               | VBIActOri165140_1940 | Choline binding protein A                                                                                          |
| Actinomyces oris               | VBIActOri165140_1701 | Choline binding protein A                                                                                          |
| Actinomyces oris               | VBIActOri165140_1928 | Choline binding protein A                                                                                          |
| Actinomyces oris               | VBIActOri165140_1572 | Choline binding protein A                                                                                          |
| Actinomyces oris               | VBIActOri165140_1161 | Choline binding protein A                                                                                          |
| Actinomyces oris               | VBIActOri165140_1149 | Choline binding protein A                                                                                          |
| Actinomyces oris               | VBIActOri165140_1395 | Choline binding protein A                                                                                          |
| Actinomyces oris               | VBIActOri165140_1359 | Choline binding protein A                                                                                          |
| Actinomyces oris               | VBIActOri165140_1656 | Choline binding protein A                                                                                          |
| Actinomyces oris               | VBIActOri165140_1154 | Choline binding protein A                                                                                          |
| Actinomyces oris               | VBIActOri165140_1431 | Choline binding protein A                                                                                          |
| Actinomyces oris               | VBIActOri165140_1605 | Choline binding protein A                                                                                          |
| Actinomyces oris               | VBIActOri165140_1095 | COG1132 ABC-type multidrug transport system 2C ATPase and permease components                                      |
| Actinomyces oris               | VBIActOri165140_1745 | COG1272 Predicted membrane protein hemolysin III homolog                                                           |
| Actinomyces oris               | VBIActOri165140_1715 | Dolichol-phosphate mannosyltransferase EC 2.4.1.83 in lipid-linked oligosaccharide synthesis cluster               |
| Actinomyces oris               | VBIActOri165140_1735 | dTDP-4-dehydrorhamnose 3 2C5-epimerase EC 5.1.3.13 dTDP-4-dehydrorhamnose reductase EC 1.1.1.133                   |
| Actinomyces oris               | VBIActOri165140_2127 | FIG01290412 hypothetical protein                                                                                   |
| Actinomyces oris               | VBIActOri165140_2038 | FIG01290412 hypothetical protein                                                                                   |
| Actinomyces oris               | VBIActOri165140_2092 | FIG01290412 hypothetical protein                                                                                   |
| Actinomyces oris               | VBIActOri165140_2095 | FIG01290412 hypothetical protein                                                                                   |
| Actinomyces oris               | VBIActOri165140_2050 | FIG01290412 hypothetical protein                                                                                   |
| Actinomyces oris               | VBIActOri165140_1997 | FIG01290412 hypothetical protein                                                                                   |
| Actinomyces oris               | VBIActOri165140_0833 | FIG01290412 hypothetical protein                                                                                   |
| Actinomyces oris               | VBIActOri165140_0257 | FKBP-type peptidyl-prolyl cis-trans isomerase fkIB EC 5.2.1.8                                                      |
| Actinomyces oris               | VBIActOri165140_0468 | Gamma-glutamyltranspeptidase EC 2.3.2.2                                                                            |
| Actinomyces oris               | VBIActOri165140_0653 | Glucose-1-phosphate thymidyltransferase EC 2.7.7.24                                                                |
| Actinomyces oris               | VBIActOri165140_0281 | Glycosyl transferase 2C group 1                                                                                    |
| Actinomyces oris               | VBIActOri165140_1814 | glycosyl transferase 2C group 1                                                                                    |
| Actinomyces oris               | VBIActOri165140_0631 | GTP pyrophosphokinase EC 2.7.6.5 2C pppGpp synthetase I                                                            |
| Actinomyces oris               | VBIActOri165140_1216 | Hemolysins and related proteins containing CBS domains                                                             |
| Actinomyces oris               | VBIActOri165140_0872 | hypothetical protein                                                                                               |
| Actinomyces oris               | VBIActOri165140_0992 | hypothetical protein                                                                                               |
| Actinomyces oris               | VBIActOri165140_1748 | hypothetical protein                                                                                               |
| Actinomyces oris               | VBIActOri165140_0839 | hypothetical protein                                                                                               |
| Actinomyces oris               | VBIActOri165140_0424 | hypothetical protein                                                                                               |
| Actinomyces oris               | VBIActOri165140_0391 | IcmF-related protein                                                                                               |
| Actinomyces oris               | VBIActOri165140_0372 | Iron (III) dicitrate transport ATP-binding protein FecE TC 3.A.1.14.1                                              |
| Actinomyces oris               | VBIActOri165140_0627 | Malonyl CoA-acyl carrier protein transacylase EC 2.3.1.39                                                          |
| Actinomyces oris               | VBIActOri165140_0626 | Malonyl CoA-acyl carrier protein transacylase EC 2.3.1.39                                                          |
| Actinomyces oris               | VBIActOri165140_0630 | Malonyl CoA-acyl carrier protein transacylase EC 2.3.1.39                                                          |
| Actinomyces oris               | VBIActOri165140_0622 | Malonyl CoA-acyl carrier protein transacylase EC 2.3.1.39                                                          |
| Actinomyces oris               | VBIActOri165140_0563 | Malonyl CoA-acyl carrier protein transacylase EC 2.3.1.39                                                          |
| Actinomyces oris               | VBIActOri165140_1301 | Mannose-1-phosphate guanylyltransferase GDP EC 2.7.7.22                                                            |
| Actinomyces oris               | VBIActOri165140_1081 | Mannose-6-phosphate isomerase EC 5.3.1.8                                                                           |
| Actinomyces oris               | VBIActOri165140_0159 | Membrane protein involved in the export of O-antigen 2C teichoic acid lipoteichoic acids                           |
| Actinomyces oris               | VBIActOri165140_1309 | Nucleoside 5-triphosphatase RdgB dHAPT 2C dITP 2C XTP-specific EC 3.6.1.15                                         |
| Actinomyces oris               | VBIActOri165140_0645 | Oligopeptide transport ATP-binding protein OppD TC 3.A.1.5.1                                                       |
| Actinomyces oris               | VBIActOri165140_0650 | Oligopeptide transport ATP-binding protein OppD TC 3.A.1.5.1                                                       |
| Actinomyces oris               | VBIActOri165140_0158 | Oligopeptide transport system permease protein OppB TC 3.A.1.5.1                                                   |
| Actinomyces oris               | VBIActOri165140_0713 | Pantoate--beta-alanine ligase EC 6.3.2.1                                                                           |
| Actinomyces oris               | VBIActOri165140_0328 | Phosphatidate cytidyltransferase EC 2.7.7.41                                                                       |
| Actinomyces oris               | VBIActOri165140_0258 | Polysaccharide export lipoprotein Wza                                                                              |
| Actinomyces oris               | VBIActOri165140_1008 | Porphobilinogen synthase EC 4.2.1.24                                                                               |
| Actinomyces oris               | VBIActOri165140_1290 | Protein export cytoplasm protein SecA ATPase RNA helicase TC 3.A.5.1.1                                             |
| Actinomyces oris               | VBIActOri165140_1067 | Putative coproporphyrinogen III oxidase of BS HemN-type 2C oxygen-independent EC 1.3.99.22 2C in heat shock gene c |
| Actinomyces oris               | VBIActOri165140_0747 | Response regulator receiverTranscriptional regulatory protein 2C C- terminal                                       |
| Actinomyces oris               | VBIActOri165140_1046 | Serine threonine-protein kinase PknA EC 2.7.11.1                                                                   |
| Actinomyces oris               | VBIActOri165140_1300 | Teichoic acid export ATP-binding protein TagH EC 3.6.3.40                                                          |
| Actinomyces oris               | VBIActOri165140_0426 | TonB-dependent receptor 3B Outer membrane receptor for ferrienterochelin and colicins                              |
| Actinomyces oris               | VBIActOri165140_0702 | Translation elongation factor Tu                                                                                   |
| Actinomyces oris               | VBIActOri165140_1084 | two component sensor kinase                                                                                        |
| Actinomyces oris               | VBIActOri165140_0784 | Type II IV secretion system ATP hydrolase TadA VirB11 CpaF 2C TadA subfamily                                       |
| Actinomyces oris               | VBIActOri165140_1743 | UDP-4-amino-4-deoxy-L-arabinose--oxoglutarate aminotransferase EC 2.6.1.-                                          |
| Actinomyces oris               | VBIActOri165140_0634 | UDP-galactose-lipid carrier transferase EC 2.-.-.-                                                                 |
| Actinomyces oris               | VBIActOri165140_0231 | UDP-glucose dehydrogenase EC 1.1.1.22                                                                              |
| Actinomyces oris               | VBIActOri165140_0288 | Uroporphyrinogen III decarboxylase EC 4.1.1.37                                                                     |
| Actinomyces oris               | VBIActOri165140_0174 | UTP--glucose-1-phosphate uridylyltransferase EC 2.7.7.9                                                            |
| Actinomyces oris               | VBIActOri165140_2211 | Zinc ABC transporter 2C periplasmic-binding protein ZnuA                                                           |
| Actinomyces oris               | VBIActOri165140_1140 | Zinc ABC transporter 2C periplasmic-binding protein ZnuA                                                           |
| Actinomyces sp. oral taxon 170 | VBIActSp161325_1453  | ABC transporter 2C ATP-binding permease protein                                                                    |
| Actinomyces sp. oral taxon 170 | VBIActSp161325_1059  | Lipid A export ATP-binding permease protein MsbA                                                                   |
| Actinomyces sp. oral taxon 170 | VBIActSp161325_2056  | putative ABC transporter 2C ATP-binding protein                                                                    |
| Actinomyces sp. oral taxon 171 | VBIActSp147751_1715  | ATP-dependent Clp protease 2C ATP-binding subunit ClpC Negative regulator of genetic competence clcC mecB          |

Table S8

|                                |                     |                                                                                    |
|--------------------------------|---------------------|------------------------------------------------------------------------------------|
| Actinomyces sp. oral taxon 171 | VBIActSp147751_0140 | ClpB protein                                                                       |
| Actinomyces sp. oral taxon 171 | VBIActSp147751_1316 | FIG00356600 hypothetical protein                                                   |
| Actinomyces sp. oral taxon 171 | VBIActSp147751_0180 | Glucose-6-phosphate isomerase EC 5.3.1.9                                           |
| Actinomyces sp. oral taxon 171 | VBIActSp147751_0151 | Long-chain-fatty-acid--CoA ligase EC 6.2.1.3                                       |
| Actinomyces sp. oral taxon 171 | VBIActSp147751_1675 | probable surface-anchored fimbrial subunit                                         |
| Actinomyces sp. oral taxon 171 | VBIActSp147751_0927 | Putative ABC transport system ATP-binding protein                                  |
| Actinomyces sp. oral taxon 171 | VBIActSp147751_0548 | SN-glycerol-3-phosphate transport ATP-binding protein UgpC TC 3.A.1.1.3            |
| Actinomyces sp. oral taxon 171 | VBIActSp147751_0547 | Translation elongation factor Tu                                                   |
| Actinomyces sp. oral taxon 175 | VBIActSp178826_2472 | 3-isopropylmalate dehydratase small subunit EC 4.2.1.33                            |
| Actinomyces sp. oral taxon 175 | VBIActSp178826_1070 | ABC transporter 2C ATP-binding protein                                             |
| Actinomyces sp. oral taxon 175 | VBIActSp178826_1560 | ABC transporter 2C ATP-binding protein                                             |
| Actinomyces sp. oral taxon 175 | VBIActSp178826_1277 | ABC transporter ATP-binding protein YvcR                                           |
| Actinomyces sp. oral taxon 175 | VBIActSp178826_2077 | ABC-type Fe3+-siderophore transport system 2C ATPase component                     |
| Actinomyces sp. oral taxon 175 | VBIActSp178826_1962 | ABC-type Fe3+-siderophore transport system 2C permease component                   |
| Actinomyces sp. oral taxon 175 | VBIActSp178826_1405 | Acetylornithine aminotransferase EC 2.6.1.11                                       |
| Actinomyces sp. oral taxon 175 | VBIActSp178826_0620 | Alkyl hydroperoxide reductase protein C EC 1.6.4.-                                 |
| Actinomyces sp. oral taxon 175 | VBIActSp178826_2055 | Aspartate 1-decarboxylase EC 4.1.1.11                                              |
| Actinomyces sp. oral taxon 175 | VBIActSp178826_2308 | ATP synthase beta chain EC 3.6.3.14                                                |
| Actinomyces sp. oral taxon 175 | VBIActSp178826_0919 | capsular polysaccharide biosynthesis protein                                       |
| Actinomyces sp. oral taxon 175 | VBIActSp178826_0263 | Choline binding protein A                                                          |
| Actinomyces sp. oral taxon 175 | VBIActSp178826_2027 | COG0791 Cell wall-associated hydrolases invasion-associated proteins               |
| Actinomyces sp. oral taxon 175 | VBIActSp178826_2241 | DNA-binding response regulator 2C LuxR family                                      |
| Actinomyces sp. oral taxon 175 | VBIActSp178826_1834 | DNA-binding response regulator mtrA                                                |
| Actinomyces sp. oral taxon 175 | VBIActSp178826_1794 | dTDP-4-dehydrorhamnose 3 2C5-epimerase EC 5.1.3.13                                 |
| Actinomyces sp. oral taxon 175 | VBIActSp178826_1792 | dTDP-4-dehydrorhamnose 3 2C5-epimerase EC 5.1.3.13                                 |
| Actinomyces sp. oral taxon 175 | VBIActSp178826_1775 | dTDP-4-dehydrorhamnose reductase EC 1.1.1.133                                      |
| Actinomyces sp. oral taxon 175 | VBIActSp178826_2082 | dTDP-glucose 4 2C6-dehydratase EC 4.2.1.46                                         |
| Actinomyces sp. oral taxon 175 | VBIActSp178826_0255 | Ferric enterobactin-binding periplasmic protein FepB TC 3.A.1.14.2                 |
| Actinomyces sp. oral taxon 175 | VBIActSp178826_0651 | Ferrochelatase 2C protoheme ferro-lyase EC 4.99.1.1                                |
| Actinomyces sp. oral taxon 175 | VBIActSp178826_2378 | Ferrous iron transport protein B                                                   |
| Actinomyces sp. oral taxon 175 | VBIActSp178826_1259 | FIG00356070 hypothetical protein                                                   |
| Actinomyces sp. oral taxon 175 | VBIActSp178826_0008 | FIG00740262 hypothetical protein                                                   |
| Actinomyces sp. oral taxon 175 | VBIActSp178826_2181 | FIG01290412 hypothetical protein                                                   |
| Actinomyces sp. oral taxon 175 | VBIActSp178826_0630 | Fimbrial subunit type 2 precursor                                                  |
| Actinomyces sp. oral taxon 175 | VBIActSp178826_2338 | FtsK SpoIIIE family protein                                                        |
| Actinomyces sp. oral taxon 175 | VBIActSp178826_2127 | FtsK SpoIIIE family protein 2C putative secretion system component EssC Yuka       |
| Actinomyces sp. oral taxon 175 | VBIActSp178826_0887 | Glutamate-1-semialdehyde aminotransferase EC 5.4.3.8                               |
| Actinomyces sp. oral taxon 175 | VBIActSp178826_0772 | glycosyltransferase                                                                |
| Actinomyces sp. oral taxon 175 | VBIActSp178826_0004 | Heat shock protein 60 family chaperone GroEL                                       |
| Actinomyces sp. oral taxon 175 | VBIActSp178826_1564 | hypothetical protein                                                               |
| Actinomyces sp. oral taxon 175 | VBIActSp178826_1339 | L-proline glycine betaine ABC transport system permease protein ProV TC 3.A.1.12.1 |
| Actinomyces sp. oral taxon 175 | VBIActSp178826_1745 | Long-chain-fatty-acid--CoA ligase EC 6.2.1.3                                       |
| Actinomyces sp. oral taxon 175 | VBIActSp178826_0639 | Menaquinone-specific isochorismate synthase EC 5.4.4.2                             |
| Actinomyces sp. oral taxon 175 | VBIActSp178826_0329 | Methionine ABC transporter ATP-binding protein                                     |
| Actinomyces sp. oral taxon 175 | VBIActSp178826_0162 | Methionine ABC transporter ATP-binding protein                                     |
| Actinomyces sp. oral taxon 175 | VBIActSp178826_2468 | NAD-dependent glyceraldehyde-3-phosphate dehydrogenase EC 1.2.1.12                 |
| Actinomyces sp. oral taxon 175 | VBIActSp178826_0328 | NAD-dependent glyceraldehyde-3-phosphate dehydrogenase EC 1.2.1.12                 |
| Actinomyces sp. oral taxon 175 | VBIActSp178826_2452 | Nitrate nitrite transporter                                                        |
| Actinomyces sp. oral taxon 175 | VBIActSp178826_0491 | Nucleoside 5-triphosphatase RdgB dHAPTP 2C dITP 2C XTP-specific EC 3.6.1.15        |
| Actinomyces sp. oral taxon 175 | VBIActSp178826_0489 | Phosphate regulon sensor protein PhoR SphS EC 2.7.13.3                             |
| Actinomyces sp. oral taxon 175 | VBIActSp178826_2218 | Phosphate regulon transcriptional regulatory protein PhoB SphR                     |
| Actinomyces sp. oral taxon 175 | VBIActSp178826_2051 | Phosphoglucosamine mutase EC 5.4.2.10                                              |
| Actinomyces sp. oral taxon 175 | VBIActSp178826_1068 | Phosphoribosylaminoimidazole-succinocarboxamide synthase EC 6.3.2.6                |
| Actinomyces sp. oral taxon 175 | VBIActSp178826_0243 | Polysaccharide biosynthesis protein CpsMV                                          |
| Actinomyces sp. oral taxon 175 | VBIActSp178826_0445 | Porphobilinogen synthase EC 4.2.1.24                                               |
| Actinomyces sp. oral taxon 175 | VBIActSp178826_1992 | Protein serine threonine phosphatase PrpC 2C regulation of stationary phase        |
| Actinomyces sp. oral taxon 175 | VBIActSp178826_1050 | putative iron-siderophore ABC transporter 2Cpermease component                     |
| Actinomyces sp. oral taxon 175 | VBIActSp178826_0605 | Putative N-acetylgalactosaminyl-diphosphoundecaprenol glucuronosyltransferase      |
| Actinomyces sp. oral taxon 175 | VBIActSp178826_1111 | putative two-component system response regulator                                   |
| Actinomyces sp. oral taxon 175 | VBIActSp178826_1104 | putative two-component system response regulator                                   |
| Actinomyces sp. oral taxon 175 | VBIActSp178826_0862 | putative two-component system response regulator                                   |
| Actinomyces sp. oral taxon 175 | VBIActSp178826_0326 | Pyrraline-5-carboxylate reductase EC 1.5.1.2                                       |
| Actinomyces sp. oral taxon 175 | VBIActSp178826_1994 | Respiratory nitrate reductase alpha chain EC 1.7.99.4                              |
| Actinomyces sp. oral taxon 175 | VBIActSp178826_0754 | Respiratory nitrate reductase delta chain EC 1.7.99.4                              |
| Actinomyces sp. oral taxon 175 | VBIActSp178826_0443 | Response regulator receiver/Transcriptional regulatory protein 2C C- terminal      |
| Actinomyces sp. oral taxon 175 | VBIActSp178826_0755 | S-ribosylhomocysteine lyase EC 4.4.1.21                                            |
| Actinomyces sp. oral taxon 175 | VBIActSp178826_1507 | Autoinducer-2 production protein LuxS                                              |
| Actinomyces sp. oral taxon 175 | VBIActSp178826_0374 | sensor histidine kinase                                                            |
| Actinomyces sp. oral taxon 175 | VBIActSp178826_0409 | serine threonine protein kinase                                                    |
| Actinomyces sp. oral taxon 175 | VBIActSp178826_0117 | Serine threonine protein kinase PrkC 2C regulator of stationary phase              |
| Actinomyces sp. oral taxon 175 | VBIActSp178826_0009 | Serine threonine-protein kinase PknA EC 2.7.11.1                                   |
| Actinomyces sp. oral taxon 175 | VBIActSp178826_0041 | Sialidase EC 3.2.1.18                                                              |
| Actinomyces sp. oral taxon 175 | VBIActSp178826_0012 | Sialidase EC 3.2.1.18                                                              |
| Actinomyces sp. oral taxon 175 | VBIActSp178826_1784 | Sialidase EC 3.2.1.18                                                              |
| Actinomyces sp. oral taxon 175 | VBIActSp178826_0596 | Teichoic acid export ATP-binding protein TagH EC 3.6.3.40                          |
| Actinomyces sp. oral taxon 175 | VBIActSp178826_0854 | two component transcriptional regulator 2C winged helix family                     |
| Actinomyces sp. oral taxon 175 | VBIActSp178826_0857 | Two-component response regulator                                                   |
| Actinomyces sp. oral taxon 175 | VBIActSp178826_1769 | type II secretion system protein E                                                 |
| Actinomyces sp. oral taxon 175 | VBIActSp178826_1765 | UDP-4-amino-4-deoxy-L-arabinose--oxoglutarate aminotransferase EC 2.6.1.-          |
|                                |                     | UDP-glucose 4-epimerase EC 5.1.3.2                                                 |

Table S8

|                                |                     |                                                                                                                  |
|--------------------------------|---------------------|------------------------------------------------------------------------------------------------------------------|
| Actinomyces sp. oral taxon 175 | VBIActSp178826_2367 | UDP-glucose dehydrogenase EC 1.1.1.22                                                                            |
| Actinomyces sp. oral taxon 175 | VBIActSp178826_1772 | UDP-N-acetyl-D-mannosaminuronic acid dehydrogenase                                                               |
| Actinomyces sp. oral taxon 175 | VBIActSp178826_1368 | UDP-N-acetylglucosamine 2-epimerase EC 5.1.3.14                                                                  |
| Actinomyces sp. oral taxon 175 | VBIActSp178826_0963 | Undecaprenyl-phosphate galactosephosphotransferase EC 2.7.8.6                                                    |
| Actinomyces sp. oral taxon 175 | VBIActSp178826_1559 | Undecaprenyl-phosphate galactosephosphotransferase EC 2.7.8.6                                                    |
| Actinomyces sp. oral taxon 175 | VBIActSp178826_0254 | Uroporphyrinogen III decarboxylase EC 4.1.1.37                                                                   |
| Actinomyces sp. oral taxon 175 | VBIActSp178826_2022 | Zinc ABC transporter 2C periplasmic-binding protein ZnuA                                                         |
| Actinomyces sp. oral taxon 178 | VBIActSp170346_1414 | 3-ketoacyl-CoA thiolase EC 2.3.1.16 Acetyl-CoA acetyltransferase EC 2.3.1.9                                      |
| Actinomyces sp. oral taxon 178 | VBIActSp170346_0939 | 3-oxoacyl-acyl-carrier-protein synthase 2C KASII EC 2.3.1.41                                                     |
| Actinomyces sp. oral taxon 178 | VBIActSp170346_0132 | ABC transporter 2C transmembrane region EC 3.6.3.27                                                              |
| Actinomyces sp. oral taxon 178 | VBIActSp170346_1071 | Alpha-L-Rha alpha-1 2C2-L-rhamnosyltransferase alpha-L-Rha alpha-1 2C3-L-rhamnosyltransferase EC 2.4.1.-         |
| Actinomyces sp. oral taxon 178 | VBIActSp170346_1611 | Cell wall surface anchor family protein                                                                          |
| Actinomyces sp. oral taxon 178 | VBIActSp170346_1894 | Choline binding protein A                                                                                        |
| Actinomyces sp. oral taxon 178 | VBIActSp170346_1897 | Choline binding protein A                                                                                        |
| Actinomyces sp. oral taxon 178 | VBIActSp170346_2033 | Choline binding protein A                                                                                        |
| Actinomyces sp. oral taxon 178 | VBIActSp170346_0123 | DNA-binding heavy metal response regulator                                                                       |
| Actinomyces sp. oral taxon 178 | VBIActSp170346_1112 | dTDP-4-dehydrorhamnose 3 2C5-epimerase EC 5.1.3.13 dTDP-4-dehydrorhamnose reductase EC 1.1.1.133                 |
| Actinomyces sp. oral taxon 178 | VBIActSp170346_1021 | Ferrisiderophore receptor Irp6A                                                                                  |
| Actinomyces sp. oral taxon 178 | VBIActSp170346_1249 | FIG00356744 hypothetical protein                                                                                 |
| Actinomyces sp. oral taxon 178 | VBIActSp170346_1545 | Fimbrial subunit type 1 precursor                                                                                |
| Actinomyces sp. oral taxon 178 | VBIActSp170346_0785 | Glutamine synthetase type I EC 6.3.1.2                                                                           |
| Actinomyces sp. oral taxon 178 | VBIActSp170346_1555 | Glutamine synthetase type I EC 6.3.1.2                                                                           |
| Actinomyces sp. oral taxon 178 | VBIActSp170346_1721 | Glycerol-3-phosphate ABC transporter 2C ATP-binding protein UgpC TC 3.A.1.1.3                                    |
| Actinomyces sp. oral taxon 178 | VBIActSp170346_0657 | GTP pyrophosphokinase EC 2.7.6.5 2C pppGpp synthetase I                                                          |
| Actinomyces sp. oral taxon 178 | VBIActSp170346_0656 | l-arginineglycine amidinotransferase                                                                             |
| Actinomyces sp. oral taxon 178 | VBIActSp170346_1643 | Phosphate regulon transcriptional regulatory protein PhoB SphR                                                   |
| Actinomyces sp. oral taxon 178 | VBIActSp170346_1977 | Phosphoglucosamine mutase EC 5.4.2.10                                                                            |
| Actinomyces sp. oral taxon 178 | VBIActSp170346_1854 | Potassium efflux system KefA protein Small-conductance mechanosensitive channel                                  |
| Actinomyces sp. oral taxon 178 | VBIActSp170346_1391 | Protein export cytoplasm protein SecA ATPase RNA helicase TC 3.A.5.1.1                                           |
| Actinomyces sp. oral taxon 178 | VBIActSp170346_1978 | Response regulator receiverTranscriptional regulatory protein 2C C- terminal                                     |
| Actinomyces sp. oral taxon 178 | VBIActSp170346_1113 | RNA polymerase sigma factor RpoD                                                                                 |
| Actinomyces sp. oral taxon 178 | VBIActSp170346_0404 | Superoxide dismutase Mn EC 1.15.1.1                                                                              |
| Actinomyces sp. oral taxon 178 | VBIActSp170346_1116 | Translation elongation factor Tu                                                                                 |
| Actinomyces sp. oral taxon 178 | VBIActSp170346_0029 | Transport ATP-binding protein CydD                                                                               |
| Actinomyces sp. oral taxon 178 | VBIActSp170346_0253 | Undecaprenyl pyrophosphate synthetase EC 2.5.1.31                                                                |
| Actinomyces sp. oral taxon 180 | VBIActSp172191_1757 | Choline binding protein A                                                                                        |
| Actinomyces sp. oral taxon 180 | VBIActSp172191_1500 | Choline binding protein A                                                                                        |
| Actinomyces sp. oral taxon 180 | VBIActSp172191_0721 | Choline binding protein A                                                                                        |
| Actinomyces sp. oral taxon 180 | VBIActSp172191_0719 | Choline binding protein A                                                                                        |
| Actinomyces sp. oral taxon 180 | VBIActSp172191_0519 | Choline binding protein A                                                                                        |
| Actinomyces sp. oral taxon 180 | VBIActSp172191_1480 | Choline binding protein A                                                                                        |
| Actinomyces sp. oral taxon 448 | VBIActSp171359_1591 | Acetoin dehydrogenase E1 component alpha-subunit EC 1.2.4.- Acetoin dehydrogenase E1 component beta-subunit EC   |
| Actinomyces sp. oral taxon 448 | VBIActSp171359_1887 | Anthranilate synthase 2C aminase component EC 4.1.3.27                                                           |
| Actinomyces sp. oral taxon 448 | VBIActSp171359_0620 | Choline binding protein A                                                                                        |
| Actinomyces sp. oral taxon 448 | VBIActSp171359_1336 | hypothetical protein                                                                                             |
| Actinomyces sp. oral taxon 448 | VBIActSp171359_1068 | Nitrate nitrite transporter                                                                                      |
| Actinomyces sp. oral taxon 448 | VBIActSp171359_1951 | Osmosensitive K+ channel histidine kinase KdpD EC 2.7.3.-                                                        |
| Actinomyces sp. oral taxon 448 | VBIActSp171359_1940 | Two-component system response regulator                                                                          |
| Actinomyces sp. oral taxon 849 | VBIActSp99412_0588  | Cell division transporter 2C ATP-binding protein FtsE TC 3.A.5.1.1                                               |
| Actinomyces sp. oral taxon 849 | VBIActSp99412_1812  | Cell envelope-associated transcriptional attenuator LytR-CpsA-Psr 2C subfamily A1 as in PMID19099556             |
| Actinomyces sp. oral taxon 849 | VBIActSp99412_1966  | Enolase EC 4.2.1.11                                                                                              |
| Actinomyces sp. oral taxon 849 | VBIActSp99412_0586  | FIG00355960 hypothetical protein                                                                                 |
| Actinomyces sp. oral taxon 849 | VBIActSp99412_0429  | Glutamine synthetase type I EC 6.3.1.2                                                                           |
| Actinomyces sp. oral taxon 849 | VBIActSp99412_1875  | hypothetical protein                                                                                             |
| Actinomyces sp. oral taxon 849 | VBIActSp99412_0192  | Lead 2C cadmium 2C zinc and mercury transporting ATPase EC 3.6.3.3B Copper-translocating P-type ATPase EC 3.6.3. |
| Actinomyces sp. oral taxon 849 | VBIActSp99412_2159  | Mannose-1-phosphate guanylyltransferase GDP EC 2.7.7.22                                                          |
| Actinomyces sp. oral taxon 849 | VBIActSp99412_0851  | RNA polymerase sigma-70 factor                                                                                   |
| Actinomyces viscosus           | VBIActVis96050_1499 | 2-keto-3-deoxy-D-arabino-heptulosonate-7- phosphate synthase II EC 2.5.1.54                                      |
| Actinomyces viscosus           | VBIActVis96050_0157 | ABC transporter 2C ATP-binding permease protein                                                                  |
| Actinomyces viscosus           | VBIActVis96050_1547 | ABC transporter 2C ATP-binding protein                                                                           |
| Actinomyces viscosus           | VBIActVis96050_1385 | ABC transporter 2C ATP-binding protein                                                                           |
| Actinomyces viscosus           | VBIActVis96050_1797 | ABC transporter 2C ATP-binding protein                                                                           |
| Actinomyces viscosus           | VBIActVis96050_1251 | ABC transporter 2C ATP-binding protein                                                                           |
| Actinomyces viscosus           | VBIActVis96050_0705 | ABC transporter 2C ATP-binding protein                                                                           |
| Actinomyces viscosus           | VBIActVis96050_1329 | ABC transporter 2C transmembrane region EC 3.6.3.27                                                              |
| Actinomyces viscosus           | VBIActVis96050_1812 | ABC transporter ATP-binding protein YvcR                                                                         |
| Actinomyces viscosus           | VBIActVis96050_0444 | ABC transporter transmembrane region                                                                             |
| Actinomyces viscosus           | VBIActVis96050_0460 | ABC-type Fe3+-siderophore transport system 2C ATPase component                                                   |
| Actinomyces viscosus           | VBIActVis96050_2252 | ABC-type Fe3+-siderophore transport system 2C ATPase component                                                   |
| Actinomyces viscosus           | VBIActVis96050_1910 | ABC-type Fe3+-siderophore transport system 2C ATPase component                                                   |
| Actinomyces viscosus           | VBIActVis96050_1880 | ABC-type Fe3+-siderophore transport system 2C permease 2 component                                               |
| Actinomyces viscosus           | VBIActVis96050_2192 | ABC-type Fe3+-siderophore transport system 2C permease component                                                 |
| Actinomyces viscosus           | VBIActVis96050_1868 | ABC-type multidrug transport system 2C ATPase component                                                          |
| Actinomyces viscosus           | VBIActVis96050_1766 | Alkanesulfonates ABC transporter ATP-binding protein Sulfonate ABC transporter 2C ATP-binding subunit SsuB       |
| Actinomyces viscosus           | VBIActVis96050_0363 | Alkyl hydroperoxide reductase protein C EC 1.6.4.-                                                               |
| Actinomyces viscosus           | VBIActVis96050_2271 | Alpha-L-Rha alpha-1 2C2-L-rhamnosyltransferase alpha-L-Rha alpha-1 2C3-L-rhamnosyltransferase EC 2.4.1.-         |
| Actinomyces viscosus           | VBIActVis96050_0449 | Aspartate 1-decarboxylase EC 4.1.1.11                                                                            |
| Actinomyces viscosus           | VBIActVis96050_0159 | ATP synthase alpha chain EC 3.6.3.14                                                                             |
| Actinomyces viscosus           | VBIActVis96050_1271 | ATP-binding transport protein Nata                                                                               |

Table S8

|                          |                      |                                                                                                      |
|--------------------------|----------------------|------------------------------------------------------------------------------------------------------|
| Actinomyces viscosus     | VBIActVis96050_2140  | capsular polysaccharide biosynthesis protein                                                         |
| Actinomyces viscosus     | VBIActVis96050_2549  | capsular polysaccharide biosynthesis protein                                                         |
| Actinomyces viscosus     | VBIActVis96050_0198  | Cell division transporter 2C ATP-binding protein FtsE TC 3.A.5.1.1                                   |
| Actinomyces viscosus     | VBIActVis96050_1063  | Cell division transporter 2C ATP-binding protein FtsE TC 3.A.5.1.1                                   |
| Actinomyces viscosus     | VBIActVis96050_2150  | Cell division trigger factor EC 5.2.1.8                                                              |
| Actinomyces viscosus     | VBIActVis96050_2387  | Cell envelope-associated transcriptional attenuator LytR-CpsA-Psr 2C subfamily A1 as in PMID19099556 |
| Actinomyces viscosus     | VBIActVis96050_0911  | Cell envelope-associated transcriptional attenuator LytR-CpsA-Psr 2C subfamily A1 as in PMID19099556 |
| Actinomyces viscosus     | VBIActVis96050_0100  | Choline binding protein A                                                                            |
| Actinomyces viscosus     | VBIActVis96050_0480  | Cna protein B-type domain protein                                                                    |
| Actinomyces viscosus     | VBIActVis96050_0584  | daunorubicin doxorubicin resistance ATP-binding protein DrrA                                         |
| Actinomyces viscosus     | VBIActVis96050_2459  | Dipeptide transport ATP-binding protein DppD TC 3.A.1.5.2                                            |
| Actinomyces viscosus     | VBIActVis96050_2546  | DNA-binding response regulator 2C LuxR family                                                        |
| Actinomyces viscosus     | VBIActVis96050_2261  | DNA-binding response regulator mtrA                                                                  |
| Actinomyces viscosus     | VBIActVis96050_2272  | Dolichol-phosphate mannosyltransferase EC 2.4.1.83 in lipid-linked oligosaccharide synthesis cluster |
| Actinomyces viscosus     | VBIActVis96050_0314  | Dolichol-phosphate mannosyltransferase EC 2.4.1.83 in lipid-linked oligosaccharide synthesis cluster |
| Actinomyces viscosus     | VBIActVis96050_2491  | Enolase EC 4.2.1.11                                                                                  |
| Actinomyces viscosus     | VBIActVis96050_0468  | Ferric enterobactin-binding periplasmic protein FepB TC 3.A.1.14.2                                   |
| Actinomyces viscosus     | VBIActVis96050_0018  | FIG00356455 hypothetical protein                                                                     |
| Actinomyces viscosus     | VBIActVis96050_0210  | FIG00544816 hypothetical protein                                                                     |
| Actinomyces viscosus     | VBIActVis96050_1992  | FIG00740262 hypothetical protein                                                                     |
| Actinomyces viscosus     | VBIActVis96050_0381  | fimbrial subunit type 1                                                                              |
| Actinomyces viscosus     | VBIActVis96050_0180  | glutamate ABC superfamily ATP binding cassette transporter 2C ABC protein                            |
| Actinomyces viscosus     | VBIActVis96050_0473  | Glutamate-1-semialdehyde aminotransferase EC 5.4.3.8                                                 |
| Actinomyces viscosus     | VBIActVis96050_0174  | Glycerol-3-phosphate ABC transporter 2C ATP-binding protein UgpC TC 3.A.1.1.3                        |
| Actinomyces viscosus     | VBIActVis96050_2511  | glycosyltransferase 2C group 2 family protein                                                        |
| Actinomyces viscosus     | VBIActVis96050_1811  | Imidazole glycerol phosphate synthase amidotransferase subunit EC 2.4.2.-                            |
| Actinomyces viscosus     | VBIActVis96050_1594  | Imidazole glycerol phosphate synthase cyclase subunit EC 4.1.3.-                                     |
| Actinomyces viscosus     | VBIActVis96050_2512  | Iron-dependent repressor IdeR DtxR                                                                   |
| Actinomyces viscosus     | VBIActVis96050_1731  | kinase domain protein                                                                                |
| Actinomyces viscosus     | VBIActVis96050_0184  | l-arginineglycine amidinotransferase                                                                 |
| Actinomyces viscosus     | VBIActVis96050_1712  | l-arginineglycine amidinotransferase                                                                 |
| Actinomyces viscosus     | VBIActVis96050_0154  | Lipid A export ATP-binding permease protein MsbA                                                     |
| Actinomyces viscosus     | VBIActVis96050_0315  | Lipid A export ATP-binding permease protein MsbA                                                     |
| Actinomyces viscosus     | VBIActVis96050_2422  | Menaquinone-specific isochorismate synthase EC 5.4.4.2                                               |
| Actinomyces viscosus     | VBIActVis96050_1875  | Methionine ABC transporter ATP-binding protein                                                       |
| Actinomyces viscosus     | VBIActVis96050_1656  | mutacin ABC transporter 2C ATP-binding protein MutF                                                  |
| Actinomyces viscosus     | VBIActVis96050_0185  | NAD-dependent glycerolaldehyde-3-phosphate dehydrogenase EC 1.2.1.12                                 |
| Actinomyces viscosus     | VBIActVis96050_0273  | Nitrate nitrite transporter                                                                          |
| Actinomyces viscosus     | VBIActVis96050_1286  | Nucleoside 5-triphosphatase RdgB dHAPTP 2C dITP 2C XTP-specific EC 3.6.1.15                          |
| Actinomyces viscosus     | VBIActVis96050_1693  | Ornithine carbamoyltransferase EC 2.1.3.3                                                            |
| Actinomyces viscosus     | VBIActVis96050_2481  | Osmosensitive K <sup>+</sup> channel histidine kinase KdpD EC 2.7.3.-                                |
| Actinomyces viscosus     | VBIActVis96050_2529  | periplasmic-binding protein                                                                          |
| Actinomyces viscosus     | VBIActVis96050_0406  | Phosphate regulon transcriptional regulatory protein PhoB SphR                                       |
| Actinomyces viscosus     | VBIActVis96050_0425  | Phosphoribosylaminoimidazole-succinocarboxamide synthase EC 6.3.2.6                                  |
| Actinomyces viscosus     | VBIActVis96050_2260  | Protein export cytoplasm protein SecA ATPase RNA helicase TC 3.A.5.1.1                               |
| Actinomyces viscosus     | VBIActVis96050_1947  | Protein serine threonine phosphatase PrpC 2C regulation of stationary phase                          |
| Actinomyces viscosus     | VBIActVis96050_2026  | putative ABC transporter ATP-binding protein                                                         |
| Actinomyces viscosus     | VBIActVis96050_0390  | putative two-component system response regulator                                                     |
| Actinomyces viscosus     | VBIActVis96050_2044  | putative two-component system response regulator                                                     |
| Actinomyces viscosus     | VBIActVis96050_2461  | putative two-component system response regulator                                                     |
| Actinomyces viscosus     | VBIActVis96050_2005  | putative two-component system response regulator                                                     |
| Actinomyces viscosus     | VBIActVis96050_0287  | putative two-component system response regulator                                                     |
| Actinomyces viscosus     | VBIActVis96050_1314  | putative two-component system sensor kinase                                                          |
| Actinomyces viscosus     | VBIActVis96050_0882  | regulatory protein 2C LuxRResponse regulator receiver                                                |
| Actinomyces viscosus     | VBIActVis96050_0233  | Respiratory nitrate reductase beta chain EC 1.7.99.4                                                 |
| Actinomyces viscosus     | VBIActVis96050_0587  | response regulator receiver domain protein                                                           |
| Actinomyces viscosus     | VBIActVis96050_2606  | Response regulator receiverTranscriptional regulatory protein 2C C- terminal                         |
| Actinomyces viscosus     | VBIActVis96050_2189  | RNA polymerase sigma-70 factor                                                                       |
| Actinomyces viscosus     | VBIActVis96050_1913  | S-ribosylhomocysteine lyase EC 4.4.1.21 Autoinducer-2 production protein LuxS                        |
| Actinomyces viscosus     | VBIActVis96050_0545  | Sortase A 2C LPXTG specific                                                                          |
| Actinomyces viscosus     | VBIActVis96050_0384  | Sortase A 2C LPXTG specific                                                                          |
| Actinomyces viscosus     | VBIActVis96050_2270  | Teichoic acid export ATP-binding protein TagH EC 3.6.3.40                                            |
| Actinomyces viscosus     | VBIActVis96050_0912  | Teichoic acid export ATP-binding protein TagH EC 3.6.3.40                                            |
| Actinomyces viscosus     | VBIActVis96050_0479  | Translation elongation factor Tu                                                                     |
| Actinomyces viscosus     | VBIActVis96050_1870  | transposase                                                                                          |
| Actinomyces viscosus     | VBIActVis96050_1290  | two component transcriptional regulator 2C LuxR family                                               |
| Actinomyces viscosus     | VBIActVis96050_2513  | Two-component response regulator                                                                     |
| Actinomyces viscosus     | VBIActVis96050_2115  | UDP-4-amino-4-deoxy-L-arabinose--oxoglutarate aminotransferase EC 2.6.1.-                            |
| Actinomyces viscosus     | VBIActVis96050_2105  | UDP-glucose dehydrogenase EC 1.1.1.22                                                                |
| Actinomyces viscosus     | VBIActVis96050_0087  | UDP-N-acetyl-D-mannosaminuronic acid dehydrogenase                                                   |
| Actinomyces viscosus     | VBIActVis96050_0209  | UDP-N-acetylglucosamine 4 2C6-dehydratase EC 4.2.1.-                                                 |
| Actinomyces viscosus     | VBIActVis96050_1401  | Undecaprenyl pyrophosphate synthetase EC 2.5.1.31                                                    |
| Actinomyces viscosus     | VBIActVis96050_2508  | Undecaprenyl-phosphate galactosephosphotransferase EC 2.7.8.6                                        |
| Actinomyces viscosus     | VBIActVis96050_0177  | Undecaprenyl-phosphate N-acetylglucosaminyl 1-phosphate transferase EC 2.7.8.-                       |
| Actinomyces viscosus     | VBIActVis96050_0903  | Urease alpha subunit EC 3.5.1.5                                                                      |
| Actinomyces viscosus     | VBIActVis96050_0908  | Urease gamma subunit EC 3.5.1.5                                                                      |
| Actinomyces viscosus     | VBIActVis96050_1404  | Zinc ABC transporter 2C periplasmic-binding protein ZnuA                                             |
| Afipia sp.               | VBIActSp150213_0590  | transport system permease protein                                                                    |
| A. actinomycetemcomitans | VBIActAgg152222_1249 | 2-keto-3-deoxy-D-arabino-heptulosonate-7- phosphate synthase II EC 2.5.1.54                          |

Table S8

|                          |                      |                                                                                                            |
|--------------------------|----------------------|------------------------------------------------------------------------------------------------------------|
| A. actinomycetemcomitans | VBIAggAct152222_1403 | 3-isopropylmalate dehydratase small subunit EC 4.2.1.33                                                    |
| A. actinomycetemcomitans | VBIAggAct169787_1856 | 3-oxoacyl-ACP synthase EC 2.3.1.41 FabV like                                                               |
| A. actinomycetemcomitans | VBIAggAct174527_0626 | 3-oxoacyl-ACP synthase EC 2.3.1.41 FabV like                                                               |
| A. actinomycetemcomitans | VBIAggAct170116_0910 | 3-oxoacyl-acyl-carrier protein reductase EC 1.1.1.100                                                      |
| A. actinomycetemcomitans | VBIAggAct174830_0025 | 3-oxoacyl-acyl-carrier-protein synthase 2C KASI EC 2.3.1.41                                                |
| A. actinomycetemcomitans | VBIAggAct174527_0146 | 3-oxoacyl-acyl-carrier-protein synthase 2C KASI EC 2.3.1.41                                                |
| A. actinomycetemcomitans | VBIAggAct152222_0575 | 3-oxoacyl-acyl-carrier-protein synthase 2C KASII EC 2.3.1.41                                               |
| A. actinomycetemcomitans | VBIAggAct174527_0467 | 3R-hydroxymyristoyl-acyl carrier protein dehydratase EC 4.2.1.-                                            |
| A. actinomycetemcomitans | VBIAggAct152489_1258 | ABC transporter                                                                                            |
| A. actinomycetemcomitans | VBIAggAct169852_1379 | ABC transporter 2C ATP-binding protein                                                                     |
| A. actinomycetemcomitans | VBIAggAct172131_0727 | ABC transporter ATP-binding protein                                                                        |
| A. actinomycetemcomitans | VBIAggAct152222_0803 | ABC transporter ATP-binding protein                                                                        |
| A. actinomycetemcomitans | VBIAggAct139153_0712 | ABC transporter ATP-binding protein YvcR                                                                   |
| A. actinomycetemcomitans | VBIAggAct139153_0203 | ABC-type Fe3+-siderophore transport system 2C ATPase component                                             |
| A. actinomycetemcomitans | VBIAggAct151347_0580 | ABC-type Fe3+-siderophore transport system 2C ATPase component                                             |
| A. actinomycetemcomitans | VBIAggAct152222_2134 | ABC-type Fe3+-siderophore transport system 2C ATPase component                                             |
| A. actinomycetemcomitans | VBIAggAct152222_1970 | ABC-type Fe3+-siderophore transport system 2C permease 2 component                                         |
| A. actinomycetemcomitans | VBIAggAct139153_0674 | ABC-type multidrug transport system 2C ATPase component                                                    |
| A. actinomycetemcomitans | VBIAggAct139153_1656 | ABC-type multidrug transport system 2C ATPase component                                                    |
| A. actinomycetemcomitans | VBIAggAct169852_2203 | ABC-type polar amino acid transport system 2C ATPase component                                             |
| A. actinomycetemcomitans | VBIAggAct174274_0805 | Acyl-acyl-carrier-protein--UDP-N- acetylglucosamine O-acyltransferase EC 2.3.1.129                         |
| A. actinomycetemcomitans | VBIAggAct174527_0834 | ADP-heptose--lipooligosaccharide heptosyltransferase II EC 2.4.1.-                                         |
| A. actinomycetemcomitans | VBIAggAct169787_1807 | ADP-heptose--lipooligosaccharide heptosyltransferase II EC 2.4.1.-                                         |
| A. actinomycetemcomitans | VBIAggAct174527_0397 | ADP-heptose--lipooligosaccharide heptosyltransferase II EC 2.4.1.-                                         |
| A. actinomycetemcomitans | VBIAggAct174527_0450 | ADP-heptose--lipooligosaccharide heptosyltransferase II EC 2.4.1.-                                         |
| A. actinomycetemcomitans | VBIAggAct170116_1048 | ADP-heptose--lipooligosaccharide heptosyltransferase II EC 2.4.1.-                                         |
| A. actinomycetemcomitans | VBIAggAct174830_0594 | ADP-L-glycero-D-manno-heptose-6-epimerase EC 5.1.3.20                                                      |
| A. actinomycetemcomitans | VBIAggAct174830_1711 | Aerobic respiration control protein arcA                                                                   |
| A. actinomycetemcomitans | VBIAggAct174527_0152 | Aerobic respiration control protein arcA                                                                   |
| A. actinomycetemcomitans | VBIAggAct172131_0466 | Aerobic respiration control protein arcA                                                                   |
| A. actinomycetemcomitans | VBIAggAct174830_0271 | Aerobic respiration control sensor protein arcB EC 2.7.3.-                                                 |
| A. actinomycetemcomitans | VBIAggAct170116_0292 | Alpha-L-Rha alpha-1 2C2-L-rhamnosyltransferase alpha-L-Rha alpha-1 2C3-L- rhamnosyltransferase EC 2.4.1.-  |
| A. actinomycetemcomitans | VBIAggAct152222_1396 | Anthranilate phosphoribosyltransferase EC 2.4.2.18                                                         |
| A. actinomycetemcomitans | VBIAggAct172131_1385 | Arginine ABC transporter 2C ATP-binding protein ArtP                                                       |
| A. actinomycetemcomitans | VBIAggAct169852_2480 | Arginine ABC transporter 2C ATP-binding protein ArtP                                                       |
| A. actinomycetemcomitans | VBIAggAct174527_1768 | Arginine ABC transporter 2C ATP-binding protein ArtP                                                       |
| A. actinomycetemcomitans | VBIAggAct170116_2108 | Arginine ABC transporter 2C ATP-binding protein ArtP                                                       |
| A. actinomycetemcomitans | VBIAggAct174830_0821 | Arginine ABC transporter 2C ATP-binding protein ArtP                                                       |
| A. actinomycetemcomitans | VBIAggAct174274_2123 | Arginine ABC transporter 2C ATP-binding protein ArtP                                                       |
| A. actinomycetemcomitans | VBIAggAct172131_1649 | Arginine ABC transporter 2C permease protein ArtQ                                                          |
| A. actinomycetemcomitans | VBIAggAct152222_1824 | Aspartate 1-decarboxylase EC 4.1.1.11                                                                      |
| A. actinomycetemcomitans | VBIAggAct152489_0513 | ATP synthase beta chain EC 3.6.3.14                                                                        |
| A. actinomycetemcomitans | VBIAggAct158134_0107 | ATP synthase beta chain EC 3.6.3.14                                                                        |
| A. actinomycetemcomitans | VBIAggAct170116_2286 | ATP synthase beta chain EC 3.6.3.14                                                                        |
| A. actinomycetemcomitans | VBIAggAct152222_1474 | ATP-binding transport protein Nata                                                                         |
| A. actinomycetemcomitans | VBIAggAct170116_2514 | ATPase provides energy for both assembly of type IV secretion complex and secretion of T-DNA complex VirB4 |
| A. actinomycetemcomitans | VBIAggAct169852_1603 | ATPase provides energy for both assembly of type IV secretion complex and secretion of T-DNA complex VirB4 |
| A. actinomycetemcomitans | VBIAggAct174274_1504 | Biofilm PGA synthesis N-glycosyltransferase PgaC EC 2.4.-.-                                                |
| A. actinomycetemcomitans | VBIAggAct169852_1682 | Bores hole in peptidoglycan layer allowing type IV secretion complex assembly to occur VirB1               |
| A. actinomycetemcomitans | VBIAggAct139153_1471 | capsular polysaccharide biosynthesis protein                                                               |
| A. actinomycetemcomitans | VBIAggAct139153_1920 | Cell division trigger factor EC 5.2.1.8                                                                    |
| A. actinomycetemcomitans | VBIAggAct172873_0853 | Cell division trigger factor EC 5.2.1.8                                                                    |
| A. actinomycetemcomitans | VBIAggAct169852_0983 | Cell division trigger factor EC 5.2.1.8                                                                    |
| A. actinomycetemcomitans | VBIAggAct172131_0169 | Cell division trigger factor EC 5.2.1.8                                                                    |
| A. actinomycetemcomitans | VBIAggAct172131_0475 | Cell envelope opacity-associated protein A                                                                 |
| A. actinomycetemcomitans | VBIAggAct151347_1140 | Cell envelope-associated transcriptional attenuator LytR-CpsA-Psr 2C subfamily A1 as in PMID19099556       |
| A. actinomycetemcomitans | VBIAggAct152222_1608 | Cell envelope-associated transcriptional attenuator LytR-CpsA-Psr 2C subfamily A1 as in PMID19099556       |
| A. actinomycetemcomitans | VBIAggAct170116_1823 | ClpB protein                                                                                               |
| A. actinomycetemcomitans | VBIAggAct169787_1552 | ClpB protein                                                                                               |
| A. actinomycetemcomitans | VBIAggAct172873_1815 | ClpB protein                                                                                               |
| A. actinomycetemcomitans | VBIAggAct169787_2033 | ClpB protein                                                                                               |
| A. actinomycetemcomitans | VBIAggAct174830_2006 | ClpB protein                                                                                               |
| A. actinomycetemcomitans | VBIAggAct169852_1566 | ClpB protein                                                                                               |
| A. actinomycetemcomitans | VBIAggAct170116_1825 | ClpB protein                                                                                               |
| A. actinomycetemcomitans | VBIAggAct172131_0565 | Coproporphyrinogen III oxidase 2C oxygen-independent EC 1.3.99.22                                          |
| A. actinomycetemcomitans | VBIAggAct174830_2124 | Coproporphyrinogen III oxidase 2C oxygen-independent EC 1.3.99.22                                          |
| A. actinomycetemcomitans | VBIAggAct170116_0221 | Coupling protein VirD4 2C ATPase required for T-DNA transfer                                               |
| A. actinomycetemcomitans | VBIAggAct170116_0539 | Cytochrome c heme lyase subunit CcmF                                                                       |
| A. actinomycetemcomitans | VBIAggAct172873_0454 | Cytochrome c-type heme lyase subunit nrfE 2C nitrite reductase complex assembly                            |
| A. actinomycetemcomitans | VBIAggAct174830_1728 | Cytochrome c-type heme lyase subunit nrfE 2C nitrite reductase complex assembly                            |
| A. actinomycetemcomitans | VBIAggAct169852_0916 | Cytochrome c-type heme lyase subunit nrfE 2C nitrite reductase complex assembly                            |
| A. actinomycetemcomitans | VBIAggAct169852_0620 | D-glycero-D-manno-heptose 1 2C7-bisphosphate phosphatase EC 3.1.1.-                                        |
| A. actinomycetemcomitans | VBIAggAct152222_2139 | daunorubicin resistance ABC transporter ATP-binding subunit                                                |
| A. actinomycetemcomitans | VBIAggAct174830_1442 | Dca                                                                                                        |
| A. actinomycetemcomitans | VBIAggAct169787_0275 | Dca                                                                                                        |
| A. actinomycetemcomitans | VBIAggAct174830_2142 | Diaminopimelate decarboxylase EC 4.1.1.20                                                                  |
| A. actinomycetemcomitans | VBIAggAct151347_1281 | Dipeptide transport ATP-binding protein DppD TC 3.A.1.5.2                                                  |
| A. actinomycetemcomitans | VBIAggAct152222_1397 | DNA-binding heavy metal response regulator                                                                 |
| A. actinomycetemcomitans | VBIAggAct152489_0360 | DNA-binding response regulator 2C LuxR family                                                              |

Table S8

|                          |                      |                                                                                                                 |
|--------------------------|----------------------|-----------------------------------------------------------------------------------------------------------------|
| A. actinomycetemcomitans | VBIAggAct151347_1282 | DNA-binding response regulator 2C LuxR family                                                                   |
| A. actinomycetemcomitans | VBIAggAct152222_0059 | DNA-binding response regulator 2C LuxR family                                                                   |
| A. actinomycetemcomitans | VBIAggAct151347_0781 | DNA-binding response regulator mtrA                                                                             |
| A. actinomycetemcomitans | VBIAggAct170116_0322 | dTDP-4-dehydrorhamnose 3 2C5-epimerase EC 5.1.3.13                                                              |
| A. actinomycetemcomitans | VBIAggAct151347_0791 | dTDP-4-dehydrorhamnose 3 2C5-epimerase EC 5.1.3.13 dTDP-4-dehydrorhamnose reductase EC 1.1.1.133                |
| A. actinomycetemcomitans | VBIAggAct174274_1169 | dTDP-4-dehydrorhamnose reductase EC 1.1.1.133                                                                   |
| A. actinomycetemcomitans | VBIAggAct151347_0836 | dTDP-glucose 4 2C6-dehydratase EC 4.2.1.46                                                                      |
| A. actinomycetemcomitans | VBIAggAct174274_1429 | dTDP-glucose 4 2C6-dehydratase EC 4.2.1.46                                                                      |
| A. actinomycetemcomitans | VBIAggAct139153_0299 | dTDP-glucose 4 2C6-dehydratase EC 4.2.1.46                                                                      |
| A. actinomycetemcomitans | VBIAggAct158134_1786 | dTDP-glucose 4 2C6-dehydratase EC 4.2.1.46                                                                      |
| A. actinomycetemcomitans | VBIAggAct172131_1755 | dTDP-glucose 4 2C6-dehydratase EC 4.2.1.46                                                                      |
| A. actinomycetemcomitans | VBIAggAct158134_1877 | dTDP-glucose 4 2C6-dehydratase EC 4.2.1.46                                                                      |
| A. actinomycetemcomitans | VBIAggAct170116_0433 | dTDP-glucose 4 2C6-dehydratase EC 4.2.1.46                                                                      |
| A. actinomycetemcomitans | VBIAggAct174830_0820 | dTDP-glucose 4 2C6-dehydratase EC 4.2.1.46                                                                      |
| A. actinomycetemcomitans | VBIAggAct169852_2046 | Enolase EC 4.2.1.11                                                                                             |
| A. actinomycetemcomitans | VBIAggAct152222_2136 | Ferric enterobactin-binding periplasmic protein FepB TC 3.A.1.14.2                                              |
| A. actinomycetemcomitans | VBIAggAct152222_0193 | Ferrisiderophore receptor Irp6A                                                                                 |
| A. actinomycetemcomitans | VBIAggAct139153_0950 | FIG00740262 hypothetical protein                                                                                |
| A. actinomycetemcomitans | VBIAggAct174527_0627 | FIG138576 3-oxoacyl-ACP synthase EC 2.3.1.41                                                                    |
| A. actinomycetemcomitans | VBIAggAct151347_1527 | Fimbrial subunit type 1 precursor                                                                               |
| A. actinomycetemcomitans | VBIAggAct174527_0111 | FKBP-type peptidyl-prolyl cis-trans isomerase FkpA precursor EC 5.2.1.8                                         |
| A. actinomycetemcomitans | VBIAggAct169852_2095 | FKBP-type peptidyl-prolyl cis-trans isomerase FkpA precursor EC 5.2.1.8                                         |
| A. actinomycetemcomitans | VBIAggAct172131_1376 | Flp pilus assembly protein RcpC CpaB                                                                            |
| A. actinomycetemcomitans | VBIAggAct174274_0314 | Flp pilus assembly protein RcpC CpaB                                                                            |
| A. actinomycetemcomitans | VBIAggAct172131_1233 | Flp pilus assembly protein TadB                                                                                 |
| A. actinomycetemcomitans | VBIAggAct169852_2692 | Flp pilus assembly protein TadB                                                                                 |
| A. actinomycetemcomitans | VBIAggAct174830_0957 | Flp pilus assembly protein TadB                                                                                 |
| A. actinomycetemcomitans | VBIAggAct172131_0168 | Flp pilus assembly protein TadB                                                                                 |
| A. actinomycetemcomitans | VBIAggAct169787_2183 | Flp pilus assembly protein TadB                                                                                 |
| A. actinomycetemcomitans | VBIAggAct174274_0294 | Flp pilus assembly protein TadD 2C contains TPR repeat                                                          |
| A. actinomycetemcomitans | VBIAggAct158134_1041 | Gamma-glutamyltranspeptidase EC 2.3.2.2                                                                         |
| A. actinomycetemcomitans | VBIAggAct151347_1192 | GlcNAc phosphomutase EC 5.4.2.3                                                                                 |
| A. actinomycetemcomitans | VBIAggAct139153_0232 | Glucose-6-phosphate isomerase EC 5.3.1.9                                                                        |
| A. actinomycetemcomitans | VBIAggAct172131_1686 | Glutamine synthetase type I EC 6.3.1.2                                                                          |
| A. actinomycetemcomitans | VBIAggAct158134_1045 | Glutamine synthetase type I EC 6.3.1.2                                                                          |
| A. actinomycetemcomitans | VBIAggAct152222_0577 | Glutamine synthetase type I EC 6.3.1.2                                                                          |
| A. actinomycetemcomitans | VBIAggAct174527_0364 | Glutamine synthetase type I EC 6.3.1.2                                                                          |
| A. actinomycetemcomitans | VBIAggAct174274_0518 | Glutamine synthetase type I EC 6.3.1.2                                                                          |
| A. actinomycetemcomitans | VBIAggAct169787_1332 | Glycerol-3-phosphate transporter                                                                                |
| A. actinomycetemcomitans | VBIAggAct139153_1590 | glycosyltransferase                                                                                             |
| A. actinomycetemcomitans | VBIAggAct174274_0664 | GTP pyrophosphokinase EC 2.7.6.5 2C pppGpp synthetase II                                                        |
| A. actinomycetemcomitans | VBIAggAct170116_1092 | GTP pyrophosphokinase EC 2.7.6.5 2C pppGpp synthetase II Guanosine-3' 2C5'-bisdiphosphate 3'-pyrophosphohydrola |
| A. actinomycetemcomitans | VBIAggAct174274_1565 | Heat shock protein 60 family chaperone GroEL                                                                    |
| A. actinomycetemcomitans | VBIAggAct174830_0717 | Heat shock protein 60 family chaperone GroEL                                                                    |
| A. actinomycetemcomitans | VBIAggAct170116_0965 | Heat shock protein 60 family chaperone GroEL                                                                    |
| A. actinomycetemcomitans | VBIAggAct172131_0865 | Heat shock protein 60 family chaperone GroEL                                                                    |
| A. actinomycetemcomitans | VBIAggAct169852_1461 | Hemolysins and related proteins containing CBS domains                                                          |
| A. actinomycetemcomitans | VBIAggAct174830_0310 | Homolog of E. coli HemY protein                                                                                 |
| A. actinomycetemcomitans | VBIAggAct169787_1803 | Homolog of E. coli HemY protein                                                                                 |
| A. actinomycetemcomitans | VBIAggAct152222_1485 | hypothetical protein                                                                                            |
| A. actinomycetemcomitans | VBIAggAct152489_0379 | hypothetical protein                                                                                            |
| A. actinomycetemcomitans | VBIAggAct151347_0263 | hypothetical protein                                                                                            |
| A. actinomycetemcomitans | VBIAggAct152222_0900 | Imidazole glycerol phosphate synthase cyclase subunit EC 4.1.3.-                                                |
| A. actinomycetemcomitans | VBIAggAct170116_0226 | Inner membrane protein forms channel for type IV secretion of T-DNA complex VirB10                              |
| A. actinomycetemcomitans | VBIAggAct170116_2288 | Inner membrane protein forms channel for type IV secretion of T-DNA complex VirB10                              |
| A. actinomycetemcomitans | VBIAggAct174274_0962 | Iron (III) dicitrate transport ATP-binding protein FecE TC 3.A.1.14.1                                           |
| A. actinomycetemcomitans | VBIAggAct174274_0389 | Iron (III) dicitrate transport ATP-binding protein FecE TC 3.A.1.14.1                                           |
| A. actinomycetemcomitans | VBIAggAct174274_0806 | Iron (III) dicitrate transport system permease protein FecC TC 3.A.1.14.1                                       |
| A. actinomycetemcomitans | VBIAggAct158134_1040 | Iron compound ABC uptake transporter substrate-binding protein PiuA                                             |
| A. actinomycetemcomitans | VBIAggAct169787_0465 | Lipid A biosynthesis KDO 2-lauroyl-lipid IVA acyltransferase EC 2.3.1.-                                         |
| A. actinomycetemcomitans | VBIAggAct174830_1166 | Lipid A export ATP-binding permease protein MsbA EC 3.6.3.25                                                    |
| A. actinomycetemcomitans | VBIAggAct174527_0187 | Lipid A export ATP-binding permease protein MsbA EC 3.6.3.25                                                    |
| A. actinomycetemcomitans | VBIAggAct172131_0016 | Lipid A export ATP-binding permease protein MsbA EC 3.6.3.25                                                    |
| A. actinomycetemcomitans | VBIAggAct174527_0917 | Lipid A export ATP-binding permease protein MsbA EC 3.6.3.25                                                    |
| A. actinomycetemcomitans | VBIAggAct174527_0576 | Lipid-A-disaccharide synthase EC 2.4.1.182                                                                      |
| A. actinomycetemcomitans | VBIAggAct174830_1663 | Lipopolysaccharide ABC transporter 2C ATP-binding protein LptB                                                  |
| A. actinomycetemcomitans | VBIAggAct174527_1694 | Lipoprotein releasing system ATP-binding protein LolD                                                           |
| A. actinomycetemcomitans | VBIAggAct139153_0711 | Long-chain-fatty-acid--CoA ligase EC 6.2.1.3                                                                    |
| A. actinomycetemcomitans | VBIAggAct152222_0278 | Macrolide export ATP-binding permease protein MacB EC 3.6.3.-                                                   |
| A. actinomycetemcomitans | VBIAggAct169852_0568 | Magnesium and cobalt efflux protein CorC                                                                        |
| A. actinomycetemcomitans | VBIAggAct169852_2213 | Magnesium and cobalt efflux protein CorC                                                                        |
| A. actinomycetemcomitans | VBIAggAct170116_0915 | Malonyl CoA-acyl carrier protein transacylase EC 2.3.1.39                                                       |
| A. actinomycetemcomitans | VBIAggAct169852_1045 | Maltose maltodextrin transport ATP-binding protein MalK EC 3.6.3.19                                             |
| A. actinomycetemcomitans | VBIAggAct158134_1007 | Maltose maltodextrin transport ATP-binding protein MalK EC 3.6.3.19                                             |
| A. actinomycetemcomitans | VBIAggAct174274_0100 | Maltose maltodextrin transport ATP-binding protein MalK EC 3.6.3.19                                             |
| A. actinomycetemcomitans | VBIAggAct174527_0173 | Maltose maltodextrin transport ATP-binding protein MalK EC 3.6.3.19                                             |
| A. actinomycetemcomitans | VBIAggAct174830_1937 | Maltose maltodextrin transport ATP-binding protein MalK EC 3.6.3.19                                             |
| A. actinomycetemcomitans | VBIAggAct170116_0631 | Manganese superoxide dismutase EC 1.15.1.1                                                                      |
| A. actinomycetemcomitans | VBIAggAct174830_0796 | Mannose-1-phosphate guanylyltransferase GDP EC 2.7.7.22                                                         |

Table S8

|                          |                      |                                                                                            |
|--------------------------|----------------------|--------------------------------------------------------------------------------------------|
| A. actinomycetemcomitans | VBIAggAct169852_1802 | Mannose-6-phosphate isomerase EC 5.3.1.8                                                   |
| A. actinomycetemcomitans | VBIAggAct174830_2148 | Mannose-6-phosphate isomerase EC 5.3.1.8                                                   |
| A. actinomycetemcomitans | VBIAggAct158134_2166 | Menaquinone-specific isochorismate synthase EC 5.4.4.2                                     |
| A. actinomycetemcomitans | VBIAggAct170116_0778 | Menaquinone-specific isochorismate synthase EC 5.4.4.2                                     |
| A. actinomycetemcomitans | VBIAggAct174527_1552 | Menaquinone-specific isochorismate synthase EC 5.4.4.2                                     |
| A. actinomycetemcomitans | VBIAggAct169852_1567 | Methionine ABC transporter ATP-binding protein                                             |
| A. actinomycetemcomitans | VBIAggAct151347_1034 | N-acetylglucosamine-1-phosphate uridylyltransferase EC 2.7.7.23                            |
| A. actinomycetemcomitans | VBIAggAct174274_0544 | NAD-dependent glyceraldehyde-3-phosphate dehydrogenase EC 1.2.1.12                         |
| A. actinomycetemcomitans | VBIAggAct169852_0756 | NAD-dependent glyceraldehyde-3-phosphate dehydrogenase EC 1.2.1.12                         |
| A. actinomycetemcomitans | VBIAggAct152222_1459 | NAD-dependent glyceraldehyde-3-phosphate dehydrogenase EC 1.2.1.12                         |
| A. actinomycetemcomitans | VBIAggAct152222_0895 | NAD-dependent glyceraldehyde-3-phosphate dehydrogenase EC 1.2.1.12                         |
| A. actinomycetemcomitans | VBIAggAct158134_1054 | Nucleoside 5-triphosphatase RdgB dHATP 2C dITP 2C XTP-specific EC 3.6.1.15                 |
| A. actinomycetemcomitans | VBIAggAct169787_1143 | Oligopeptide ABC transporter 2C periplasmic oligopeptide-binding protein OppA TC 3.A.1.5.1 |
| A. actinomycetemcomitans | VBIAggAct172131_1929 | Oligopeptide transport ATP-binding protein OppD TC 3.A.1.5.1                               |
| A. actinomycetemcomitans | VBIAggAct151347_1213 | Oligopeptide transport ATP-binding protein OppF TC 3.A.1.5.1                               |
| A. actinomycetemcomitans | VBIAggAct152222_0742 | Ornithine carbamoyltransferase EC 2.1.3.3                                                  |
| A. actinomycetemcomitans | VBIAggAct174527_1343 | Outer membrane protein A precursor                                                         |
| A. actinomycetemcomitans | VBIAggAct174527_1197 | Outer membrane protein A precursor                                                         |
| A. actinomycetemcomitans | VBIAggAct170116_0291 | Outer membrane protein A precursor                                                         |
| A. actinomycetemcomitans | VBIAggAct174830_1075 | Outer membrane protein A precursor                                                         |
| A. actinomycetemcomitans | VBIAggAct172873_1734 | Outer membrane protein A precursor                                                         |
| A. actinomycetemcomitans | VBIAggAct170116_1563 | Outer membrane protein A precursor                                                         |
| A. actinomycetemcomitans | VBIAggAct158134_1056 | Outer membrane protein A precursor                                                         |
| A. actinomycetemcomitans | VBIAggAct172131_1734 | Outer membrane protein A precursor                                                         |
| A. actinomycetemcomitans | VBIAggAct169787_0683 | Outer membrane protein A precursor                                                         |
| A. actinomycetemcomitans | VBIAggAct169787_0701 | Outer membrane protein A precursor                                                         |
| A. actinomycetemcomitans | VBIAggAct170116_2409 | Outer membrane protein assembly factor YaeT precursor                                      |
| A. actinomycetemcomitans | VBIAggAct169787_1709 | Outer membrane protein assembly factor YaeT precursor                                      |
| A. actinomycetemcomitans | VBIAggAct170116_1421 | Outer membrane protein assembly factor YaeT precursor                                      |
| A. actinomycetemcomitans | VBIAggAct152489_2384 | Outer membrane protein assembly factor YaeT precursor                                      |
| A. actinomycetemcomitans | VBIAggAct174274_0045 | Outer membrane protein assembly factor YaeT precursor                                      |
| A. actinomycetemcomitans | VBIAggAct174274_1067 | Outer membrane receptor for lactoferrin or transferrin 2C TonB-dependent protein A         |
| A. actinomycetemcomitans | VBIAggAct169852_1815 | Outer membrane receptor proteins 2C mostly Fe transport                                    |
| A. actinomycetemcomitans | VBIAggAct152222_1810 | Pantoate--beta-alanine ligase EC 6.3.2.1                                                   |
| A. actinomycetemcomitans | VBIAggAct170116_0278 | Peptidoglycan hydrolase VirB1 2C involved in T-DNA transfer                                |
| A. actinomycetemcomitans | VBIAggAct170116_0850 | Peptidyl-prolyl cis-trans isomerase ppiB EC 5.2.1.8                                        |
| A. actinomycetemcomitans | VBIAggAct174527_0723 | Peptidyl-prolyl cis-trans isomerase ppiB EC 5.2.1.8                                        |
| A. actinomycetemcomitans | VBIAggAct151347_1283 | Phosphate regulon transcriptional regulatory protein PhoB SphR                             |
| A. actinomycetemcomitans | VBIAggAct151347_1285 | Phosphate regulon transcriptional regulatory protein PhoB SphR                             |
| A. actinomycetemcomitans | VBIAggAct169852_1042 | Phosphoglucosamine mutase EC 5.4.2.10                                                      |
| A. actinomycetemcomitans | VBIAggAct174274_2127 | Phosphoglucosamine mutase EC 5.4.2.10                                                      |
| A. actinomycetemcomitans | VBIAggAct174274_2122 | Phosphoheptose isomerase 1 EC 5.3.1.-                                                      |
| A. actinomycetemcomitans | VBIAggAct174274_0330 | Phosphoheptose isomerase 1 EC 5.3.1.-                                                      |
| A. actinomycetemcomitans | VBIAggAct169852_2007 | Phosphomannomutase EC 5.4.2.8                                                              |
| A. actinomycetemcomitans | VBIAggAct158134_0278 | Phosphomannomutase EC 5.4.2.8                                                              |
| A. actinomycetemcomitans | VBIAggAct174274_1577 | Phosphomannomutase EC 5.4.2.8                                                              |
| A. actinomycetemcomitans | VBIAggAct152489_1692 | Phosphomannomutase EC 5.4.2.8                                                              |
| A. actinomycetemcomitans | VBIAggAct152222_0121 | polyamine ABC transporter 2C ATP-binding protein EC3.6.3.31                                |
| A. actinomycetemcomitans | VBIAggAct139153_1397 | Polysaccharide biosynthesis protein CpsMV                                                  |
| A. actinomycetemcomitans | VBIAggAct172131_2124 | Porphobilinogen deaminase EC 2.5.1.61                                                      |
| A. actinomycetemcomitans | VBIAggAct169852_1450 | Protein export cytoplasm protein SecA ATPase RNA helicase TC 3.A.5.1.1                     |
| A. actinomycetemcomitans | VBIAggAct174527_0373 | Protein export cytoplasm protein SecA ATPase RNA helicase TC 3.A.5.1.1                     |
| A. actinomycetemcomitans | VBIAggAct174274_1068 | Protein export cytoplasm protein SecA ATPase RNA helicase TC 3.A.5.1.1                     |
| A. actinomycetemcomitans | VBIAggAct172131_0465 | Protein export cytoplasm protein SecA ATPase RNA helicase TC 3.A.5.1.1                     |
| A. actinomycetemcomitans | VBIAggAct172131_0889 | Protoporphyrinogen IX oxidase 2C oxygen-independent 2C HemG EC 1.3.-.-                     |
| A. actinomycetemcomitans | VBIAggAct169787_0637 | Purine nucleotide synthesis repressor                                                      |
| A. actinomycetemcomitans | VBIAggAct174527_0170 | Purine nucleotide synthesis repressor                                                      |
| A. actinomycetemcomitans | VBIAggAct152222_1625 | putative ABC transporter                                                                   |
| A. actinomycetemcomitans | VBIAggAct152222_1712 | putative ABC transporter ATP-binding protein                                               |
| A. actinomycetemcomitans | VBIAggAct151347_2157 | putative ABC transporter ATP-binding protein                                               |
| A. actinomycetemcomitans | VBIAggAct139153_0278 | putative ABC transporter ATP-binding protein                                               |
| A. actinomycetemcomitans | VBIAggAct139153_1070 | putative ABC transporter ATP-binding protein                                               |
| A. actinomycetemcomitans | VBIAggAct152222_1335 | putative ABC transporter ATP-binding protein                                               |
| A. actinomycetemcomitans | VBIAggAct152222_1624 | putative ABC transporter ATP-binding protein                                               |
| A. actinomycetemcomitans | VBIAggAct152222_0796 | putative ABC transporter ATP-binding protein                                               |
| A. actinomycetemcomitans | VBIAggAct152222_1034 | putative iron ABC transporter 2C ATP-binding protein                                       |
| A. actinomycetemcomitans | VBIAggAct152222_1141 | Putative iron transport permease                                                           |
| A. actinomycetemcomitans | VBIAggAct139153_1417 | Putative N-acetylgalactosaminyldiphosphoundecaprenol glucuronosyltransferase               |
| A. actinomycetemcomitans | VBIAggAct151347_0268 | Putative transport system 2C ATP-binding protein                                           |
| A. actinomycetemcomitans | VBIAggAct151347_1573 | putative two-component system response regulator                                           |
| A. actinomycetemcomitans | VBIAggAct139153_1064 | putative two-component system response regulator                                           |
| A. actinomycetemcomitans | VBIAggAct151347_1378 | putative two-component system response regulator                                           |
| A. actinomycetemcomitans | VBIAggAct139153_0654 | putative two-component system response regulator                                           |
| A. actinomycetemcomitans | VBIAggAct170116_0436 | Putrescine transport ATP-binding protein PotA TC 3.A.1.11.1                                |
| A. actinomycetemcomitans | VBIAggAct158134_2001 | Putrescine transport ATP-binding protein PotA TC 3.A.1.11.1                                |
| A. actinomycetemcomitans | VBIAggAct174527_1308 | Putrescine transport ATP-binding protein PotA TC 3.A.1.11.1                                |
| A. actinomycetemcomitans | VBIAggAct174830_0728 | Putrescine transport ATP-binding protein PotA TC 3.A.1.11.1                                |
| A. actinomycetemcomitans | VBIAggAct174527_0025 | Putrescine transport ATP-binding protein PotA TC 3.A.1.11.1                                |
| A. actinomycetemcomitans | VBIAggAct174527_1156 | Pyridoxamine 5'-phosphate oxidase EC 1.4.3.5                                               |

Table S8

|                          |                      |                                                                                       |
|--------------------------|----------------------|---------------------------------------------------------------------------------------|
| A. actinomycetemcomitans | VBIAggAct139153_1605 | Pyrroline-5-carboxylate reductase EC 1.5.1.2                                          |
| A. actinomycetemcomitans | VBIAggAct152489_0380 | regulatory protein 2C LuxRResponse regulator receiver                                 |
| A. actinomycetemcomitans | VBIAggAct151347_0374 | Respiratory nitrate reductase alpha chain EC 1.7.99.4                                 |
| A. actinomycetemcomitans | VBIAggAct139153_0611 | Respiratory nitrate reductase alpha chain EC 1.7.99.4                                 |
| A. actinomycetemcomitans | VBIAggAct151347_0413 | Respiratory nitrate reductase gamma chain EC 1.7.99.4                                 |
| A. actinomycetemcomitans | VBIAggAct152222_0525 | RNA binding methyltransferase FtsJ like                                               |
| A. actinomycetemcomitans | VBIAggAct152222_1246 | RNA polymerase sigma factor RpoD                                                      |
| A. actinomycetemcomitans | VBIAggAct152222_1154 | RNA polymerase sigma factor RpoD                                                      |
| A. actinomycetemcomitans | VBIAggAct152222_1155 | RNA polymerase sigma factor RpoD                                                      |
| A. actinomycetemcomitans | VBIAggAct152489_1815 | RNA polymerase sigma factor RpoD                                                      |
| A. actinomycetemcomitans | VBIAggAct172131_0171 | RNA polymerase sigma factor RpoE                                                      |
| A. actinomycetemcomitans | VBIAggAct174274_0519 | RNA polymerase sigma factor RpoE                                                      |
| A. actinomycetemcomitans | VBIAggAct174830_0479 | RNA polymerase sigma factor RpoE                                                      |
| A. actinomycetemcomitans | VBIAggAct174830_1367 | RNA polymerase sigma factor RpoE                                                      |
| A. actinomycetemcomitans | VBIAggAct169787_1498 | RNA polymerase sigma factor RpoE                                                      |
| A. actinomycetemcomitans | VBIAggAct174830_0535 | RNA polymerase sigma factor RpoE                                                      |
| A. actinomycetemcomitans | VBIAggAct174830_1247 | RNA polymerase sigma factor RpoH                                                      |
| A. actinomycetemcomitans | VBIAggAct172131_2102 | RNA polymerase sigma factor RpoH                                                      |
| A. actinomycetemcomitans | VBIAggAct174527_0383 | RNA polymerase sigma factor RpoH                                                      |
| A. actinomycetemcomitans | VBIAggAct151347_0342 | RNA polymerase sigma-70 factor                                                        |
| A. actinomycetemcomitans | VBIAggAct174274_1041 | RTX toxins determinant A and related Ca2+-binding proteins                            |
| A. actinomycetemcomitans | VBIAggAct151347_1789 | S-ribosylhomocysteine lyase EC 4.4.1.21 Autoinducer-2 production protein LuxS         |
| A. actinomycetemcomitans | VBIAggAct151347_1742 | Serine threonine-protein kinase PknA EC 2.7.11.1                                      |
| A. actinomycetemcomitans | VBIAggAct152222_0688 | serine-threonine protein kinase                                                       |
| A. actinomycetemcomitans | VBIAggAct151347_0734 | Sialidase EC 3.2.1.18                                                                 |
| A. actinomycetemcomitans | VBIAggAct151347_1456 | Sortase A 2C LPXTG specific                                                           |
| A. actinomycetemcomitans | VBIAggAct152489_2048 | Sulfate adenyltransferase subunit 1 EC 2.7.7.4 Adenylsulfate kinase EC 2.7.1.25       |
| A. actinomycetemcomitans | VBIAggAct170116_0320 | Teichoic acid export ATP-binding protein TagH EC 3.6.3.40                             |
| A. actinomycetemcomitans | VBIAggAct174274_1130 | Teichoic acid export ATP-binding protein TagH EC 3.6.3.40                             |
| A. actinomycetemcomitans | VBIAggAct151347_0808 | Teichoic acid export ATP-binding protein TagH EC 3.6.3.40                             |
| A. actinomycetemcomitans | VBIAggAct152222_1497 | Teichoic acid export ATP-binding protein TagH EC 3.6.3.40                             |
| A. actinomycetemcomitans | VBIAggAct174274_0094 | Tetraacyldisaccharide 4'-kinase EC 2.7.1.130                                          |
| A. actinomycetemcomitans | VBIAggAct158134_1044 | Tetraacyldisaccharide 4'-kinase EC 2.7.1.130                                          |
| A. actinomycetemcomitans | VBIAggAct174527_0176 | thiamine-phosphate pyrophosphorylase EC2.5.1.3                                        |
| A. actinomycetemcomitans | VBIAggAct169852_1048 | TonB-dependent receptor 3B Outer membrane receptor for ferrienterochelin and colicins |
| A. actinomycetemcomitans | VBIAggAct174527_1498 | Transcriptional repressor protein TyrR                                                |
| A. actinomycetemcomitans | VBIAggAct152489_2213 | Translation elongation factor Tu                                                      |
| A. actinomycetemcomitans | VBIAggAct174830_1164 | Translation elongation factor Tu                                                      |
| A. actinomycetemcomitans | VBIAggAct174527_0174 | Translation elongation factor Tu                                                      |
| A. actinomycetemcomitans | VBIAggAct158134_0607 | Translation elongation factor Tu                                                      |
| A. actinomycetemcomitans | VBIAggAct174527_1712 | Translation elongation factor Tu                                                      |
| A. actinomycetemcomitans | VBIAggAct170116_1029 | Translation elongation factor Tu                                                      |
| A. actinomycetemcomitans | VBIAggAct174274_0246 | Translation elongation factor Tu                                                      |
| A. actinomycetemcomitans | VBIAggAct172131_0451 | Translation elongation factor Tu                                                      |
| A. actinomycetemcomitans | VBIAggAct169787_1800 | Translation elongation factor Tu                                                      |
| A. actinomycetemcomitans | VBIAggAct172131_0990 | Translation elongation factor Tu                                                      |
| A. actinomycetemcomitans | VBIAggAct172131_1888 | transport associated protein 10                                                       |
| A. actinomycetemcomitans | VBIAggAct174274_0530 | Transport ATP-binding protein CydC                                                    |
| A. actinomycetemcomitans | VBIAggAct172131_0756 | Transport ATP-binding protein CydD                                                    |
| A. actinomycetemcomitans | VBIAggAct170116_2287 | Transport ATP-binding protein CydD                                                    |
| A. actinomycetemcomitans | VBIAggAct139153_1898 | Transport ATP-binding protein CydD                                                    |
| A. actinomycetemcomitans | VBIAggAct158134_0059 | Transport ATP-binding protein CydD                                                    |
| A. actinomycetemcomitans | VBIAggAct151347_0149 | two component system response regulator                                               |
| A. actinomycetemcomitans | VBIAggAct152222_1400 | two component transcriptional regulator 2C LuxR family                                |
| A. actinomycetemcomitans | VBIAggAct152489_0435 | two component transcriptional regulator 2C LuxR family                                |
| A. actinomycetemcomitans | VBIAggAct152222_0216 | Two-component response regulator                                                      |
| A. actinomycetemcomitans | VBIAggAct151347_2021 | two-component response regulator                                                      |
| A. actinomycetemcomitans | VBIAggAct158134_0759 | Type II IV secretion system ATP hydrolase TadA VirB11 CpaF 2C TadA subfamily          |
| A. actinomycetemcomitans | VBIAggAct174830_0365 | Type II IV secretion system ATP hydrolase TadA VirB11 CpaF 2C TadA subfamily          |
| A. actinomycetemcomitans | VBIAggAct169852_0153 | Type II IV secretion system ATP hydrolase TadA VirB11 CpaF 2C TadA subfamily          |
| A. actinomycetemcomitans | VBIAggAct174830_0893 | Type II IV secretion system ATP hydrolase TadA VirB11 CpaF 2C TadA subfamily          |
| A. actinomycetemcomitans | VBIAggAct169852_2596 | Type II IV secretion system ATP hydrolase TadA VirB11 CpaF 2C TadA subfamily          |
| A. actinomycetemcomitans | VBIAggAct174274_0312 | Type II IV secretion system ATP hydrolase TadA VirB11 CpaF 2C TadA subfamily          |
| A. actinomycetemcomitans | VBIAggAct172131_1270 | Type II IV secretion system ATP hydrolase TadA VirB11 CpaF 2C TadA subfamily          |
| A. actinomycetemcomitans | VBIAggAct174830_0422 | Type II IV secretion system ATP hydrolase TadA VirB11 CpaF 2C TadA subfamily          |
| A. actinomycetemcomitans | VBIAggAct169852_0276 | Type II IV secretion system ATPase TadZ CpaE 2C associated with Flp pilus assembly    |
| A. actinomycetemcomitans | VBIAggAct158134_0772 | Type II IV secretion system ATPase TadZ CpaE 2C associated with Flp pilus assembly    |
| A. actinomycetemcomitans | VBIAggAct169852_0279 | Type II IV secretion system secretin RcpA CpaC 2C associated with Flp pilus assembly  |
| A. actinomycetemcomitans | VBIAggAct172131_1314 | Type II IV secretion system secretin RcpA CpaC 2C associated with Flp pilus assembly  |
| A. actinomycetemcomitans | VBIAggAct174274_0313 | Type II IV secretion system secretin RcpA CpaC 2C associated with Flp pilus assembly  |
| A. actinomycetemcomitans | VBIAggAct172131_2031 | Type IV fimbrial assembly 2C ATPase PilB                                              |
| A. actinomycetemcomitans | VBIAggAct169852_0622 | Type IV pilin PilA                                                                    |
| A. actinomycetemcomitans | VBIAggAct169787_0435 | Type IV pilin PilA                                                                    |
| A. actinomycetemcomitans | VBIAggAct170116_1329 | UDP-3-O-3-hydroxymyristoyl glucosamine N-acyltransferase EC 2.3.1.-                   |
| A. actinomycetemcomitans | VBIAggAct174830_1635 | UDP-3-O-3-hydroxymyristoyl glucosamine N-acyltransferase EC 2.3.1.-                   |
| A. actinomycetemcomitans | VBIAggAct139153_1949 | UDP-galactose-lipid carrier transferase EC 2.-.-.-                                    |
| A. actinomycetemcomitans | VBIAggAct169787_0857 | UDP-glucose 4-epimerase EC 5.1.3.2                                                    |
| A. actinomycetemcomitans | VBIAggAct174527_0670 | UDP-glucose 4-epimerase EC 5.1.3.2                                                    |
| A. actinomycetemcomitans | VBIAggAct170116_2285 | UDP-glucose 4-epimerase EC 5.1.3.2                                                    |

Table S8

|                             |                      |                                                                                                                    |
|-----------------------------|----------------------|--------------------------------------------------------------------------------------------------------------------|
| A. actinomycetemcomitans    | VBIAggAct151347_1154 | UDP-glucose 4-epimerase EC 5.1.3.2                                                                                 |
| A. actinomycetemcomitans    | VBIAggAct139153_1147 | UDP-glucose dehydrogenase EC 1.1.1.22                                                                              |
| A. actinomycetemcomitans    | VBIAggAct151347_0856 | UDP-N-acetylglucosamine 2-epimerase EC 5.1.3.14                                                                    |
| A. actinomycetemcomitans    | VBIAggAct170116_1534 | Undecaprenyl pyrophosphate synthetase EC 2.5.1.31                                                                  |
| A. actinomycetemcomitans    | VBIAggAct152222_1257 | Undecaprenyl pyrophosphate synthetase EC 2.5.1.31                                                                  |
| A. actinomycetemcomitans    | VBIAggAct169787_1815 | Undecaprenyl-phosphate galactosephosphotransferase EC 2.7.8.6                                                      |
| A. actinomycetemcomitans    | VBIAggAct174830_0801 | Undecaprenyl-phosphate galactosephosphotransferase EC 2.7.8.6                                                      |
| A. actinomycetemcomitans    | VBIAggAct152489_0602 | Urease accessory protein UreG                                                                                      |
| A. actinomycetemcomitans    | VBIAggAct152489_0626 | Urease alpha subunit EC 3.5.1.5                                                                                    |
| A. actinomycetemcomitans    | VBIAggAct152489_0805 | Urease beta subunit EC 3.5.1.5                                                                                     |
| A. actinomycetemcomitans    | VBIAggAct152489_0904 | Urease gamma subunit EC 3.5.1.5                                                                                    |
| A. actinomycetemcomitans    | VBIAggAct158134_0606 | Uroporphyrinogen-III methyltransferase EC 2.1.1.107                                                                |
| A. actinomycetemcomitans    | VBIAggAct174274_2259 | VgrG protein                                                                                                       |
| A. actinomycetemcomitans    | VBIAggAct172873_1477 | VgrG protein                                                                                                       |
| A. actinomycetemcomitans    | VBIAggAct174527_1350 | VgrG protein                                                                                                       |
| A. actinomycetemcomitans    | VBIAggAct174527_0027 | VgrG protein                                                                                                       |
| A. actinomycetemcomitans    | VBIAggAct169787_0625 | VgrG protein                                                                                                       |
| A. actinomycetemcomitans    | VBIAggAct169787_1806 | VgrG protein                                                                                                       |
| A. actinomycetemcomitans    | VBIAggAct152489_1611 | Zinc ABC transporter 2C ATP-binding protein ZnuC                                                                   |
| Aggregatibacter aphrophilus | VBIAggAph86045_0377  | 2-Keto-3-deoxy-D-manno-octulosonate-8-phosphate synthase EC 2.5.1.55                                               |
| Aggregatibacter aphrophilus | VBIAggAph86045_1326  | 3-deoxy-D-manno-octulosonic-acid transferase EC 2.-.-.-                                                            |
| Aggregatibacter aphrophilus | VBIAggAph86045_2106  | 3-deoxy-D-manno-octulosonic-acid transferase EC 2.-.-.-                                                            |
| Aggregatibacter aphrophilus | VBIAggAph86045_1696  | 3-oxoacyl-ACP synthase EC 2.3.1.41 FabV like                                                                       |
| Aggregatibacter aphrophilus | VBIAggAph86045_1495  | 3-oxoacyl-acyl-carrier-protein synthase 2C KASI EC 2.3.1.41                                                        |
| Aggregatibacter aphrophilus | VBIAggAph86045_0595  | 3R-hydroxymyristoyl-acyl carrier protein dehydratase EC 4.2.1.-                                                    |
| Aggregatibacter aphrophilus | VBIAggAph86045_1903  | ABC-type polar amino acid transport system 2C ATPase component                                                     |
| Aggregatibacter aphrophilus | VBIAggAph86045_0523  | Aerobic respiration control protein arcA                                                                           |
| Aggregatibacter aphrophilus | VBIAggAph86045_1535  | Aerobic respiration control protein arcA                                                                           |
| Aggregatibacter aphrophilus | VBIAggAph86045_2174  | Alcohol dehydrogenase EC 1.1.1.1 3B Acetaldehyde dehydrogenase EC 1.2.1.10                                         |
| Aggregatibacter aphrophilus | VBIAggAph86045_0492  | Anthranilate phosphoribosyltransferase EC 2.4.2.18                                                                 |
| Aggregatibacter aphrophilus | VBIAggAph86045_0195  | Arginine ABC transporter 2C ATP-binding protein ArtP                                                               |
| Aggregatibacter aphrophilus | VBIAggAph86045_1141  | Arginine ABC transporter 2C ATP-binding protein ArtP                                                               |
| Aggregatibacter aphrophilus | VBIAggAph86045_0145  | ATP synthase alpha chain EC 3.6.3.14                                                                               |
| Aggregatibacter aphrophilus | VBIAggAph86045_0026  | ATP synthase alpha chain EC 3.6.3.14                                                                               |
| Aggregatibacter aphrophilus | VBIAggAph86045_1579  | ATP synthase alpha chain EC 3.6.3.14                                                                               |
| Aggregatibacter aphrophilus | VBIAggAph86045_0580  | ATP synthase alpha chain EC 3.6.3.14                                                                               |
| Aggregatibacter aphrophilus | VBIAggAph86045_1958  | ATP synthase alpha chain EC 3.6.3.14                                                                               |
| Aggregatibacter aphrophilus | VBIAggAph86045_1988  | ATP synthase beta chain EC 3.6.3.14                                                                                |
| Aggregatibacter aphrophilus | VBIAggAph86045_0907  | ATPase provides energy for both assembly of type IV secretion complex and secretion of T-DNA complex VirB4         |
| Aggregatibacter aphrophilus | VBIAggAph86045_0746  | CipB protein                                                                                                       |
| Aggregatibacter aphrophilus | VBIAggAph86045_1908  | CipB protein                                                                                                       |
| Aggregatibacter aphrophilus | VBIAggAph86045_1706  | Copper-sensing two-component system response regulator CpxR                                                        |
| Aggregatibacter aphrophilus | VBIAggAph86045_0994  | Coupling protein VirD4 2C ATPase required for T-DNA transfer                                                       |
| Aggregatibacter aphrophilus | VBIAggAph86045_1646  | Cytochrome c heme lyase subunit CcmF                                                                               |
| Aggregatibacter aphrophilus | VBIAggAph86045_0572  | Cytochrome c heme lyase subunit CcmF                                                                               |
| Aggregatibacter aphrophilus | VBIAggAph86045_0169  | Cytochrome c heme lyase subunit CcmF                                                                               |
| Aggregatibacter aphrophilus | VBIAggAph86045_1529  | Cytochrome c-type biogenesis protein CcmC 2C putative heme lyase for CcmE                                          |
| Aggregatibacter aphrophilus | VBIAggAph86045_1496  | Dca                                                                                                                |
| Aggregatibacter aphrophilus | VBIAggAph86045_0295  | dTDP-glucose 4 2C6-dehydratase EC 4.2.1.46                                                                         |
| Aggregatibacter aphrophilus | VBIAggAph86045_1530  | Enolase EC 4.2.1.11                                                                                                |
| Aggregatibacter aphrophilus | VBIAggAph86045_0029  | Enolase EC 4.2.1.11                                                                                                |
| Aggregatibacter aphrophilus | VBIAggAph86045_1494  | ferric ABC transporter ATP-binding protein                                                                         |
| Aggregatibacter aphrophilus | VBIAggAph86045_2215  | Ferric iron ABC transporter 2C ATP-binding protein                                                                 |
| Aggregatibacter aphrophilus | VBIAggAph86045_1583  | Ferric iron ABC transporter 2C iron-binding protein                                                                |
| Aggregatibacter aphrophilus | VBIAggAph86045_0047  | Ferric iron ABC transporter 2C iron-binding protein                                                                |
| Aggregatibacter aphrophilus | VBIAggAph86045_0174  | Ferrichrome-iron receptor                                                                                          |
| Aggregatibacter aphrophilus | VBIAggAph86045_1869  | Flp pilus assembly protein TadB                                                                                    |
| Aggregatibacter aphrophilus | VBIAggAph86045_0218  | Flp pilus assembly protein TadB                                                                                    |
| Aggregatibacter aphrophilus | VBIAggAph86045_1007  | Flp pilus assembly protein TadD 2C contains TPR repeat                                                             |
| Aggregatibacter aphrophilus | VBIAggAph86045_0240  | Flp pilus assembly protein TadD 2C contains TPR repeat                                                             |
| Aggregatibacter aphrophilus | VBIAggAph86045_1448  | Glucose-1-phosphate thymidyltransferase EC 2.7.7.24                                                                |
| Aggregatibacter aphrophilus | VBIAggAph86045_0551  | Glycerol-3-phosphate transporter                                                                                   |
| Aggregatibacter aphrophilus | VBIAggAph86045_0585  | Glycerol-3-phosphate transporter                                                                                   |
| Aggregatibacter aphrophilus | VBIAggAph86045_0122  | GTP pyrophosphokinase EC 2.7.6.5 2C pppGpp synthetase II Guanosine-3' 2C5'-bisdiphosphate 3'-pyrophosphohydrolyase |
| Aggregatibacter aphrophilus | VBIAggAph86045_2047  | GTP pyrophosphokinase EC 2.7.6.5 2C pppGpp synthetase II Guanosine-3' 2C5'-bisdiphosphate 3'-pyrophosphohydrolyase |
| Aggregatibacter aphrophilus | VBIAggAph86045_0177  | GTP pyrophosphokinase EC 2.7.6.5 2C pppGpp synthetase II Guanosine-3' 2C5'-bisdiphosphate 3'-pyrophosphohydrolyase |
| Aggregatibacter aphrophilus | VBIAggAph86045_0024  | Heat shock protein 60 family chaperone GroEL                                                                       |
| Aggregatibacter aphrophilus | VBIAggAph86045_1667  | Heat shock protein 60 family chaperone GroEL                                                                       |
| Aggregatibacter aphrophilus | VBIAggAph86045_1849  | HemY protein                                                                                                       |
| Aggregatibacter aphrophilus | VBIAggAph86045_0180  | Iron (III) dicitrate transport system 2C periplasmic iron-binding protein FecB TC 3.A.1.14.1                       |
| Aggregatibacter aphrophilus | VBIAggAph86045_1872  | Lipid A export ATP-binding permease protein MsbA EC 3.6.3.25                                                       |
| Aggregatibacter aphrophilus | VBIAggAph86045_1368  | Lipid A export ATP-binding permease protein MsbA EC 3.6.3.25                                                       |
| Aggregatibacter aphrophilus | VBIAggAph86045_1989  | macrolide export ATP-binding permease protein MacB                                                                 |
| Aggregatibacter aphrophilus | VBIAggAph86045_1672  | Magnesium and cobalt efflux protein CorC                                                                           |
| Aggregatibacter aphrophilus | VBIAggAph86045_1453  | Manganese ABC transporter 2C periplasmic-binding protein SitA                                                      |
| Aggregatibacter aphrophilus | VBIAggAph86045_1497  | Manganese superoxide dismutase EC 1.15.1.1                                                                         |
| Aggregatibacter aphrophilus | VBIAggAph86045_0274  | Membrane-bound lytic murein transglycosylase B precursor EC 3.2.1.-                                                |
| Aggregatibacter aphrophilus | VBIAggAph86045_1655  | NAD-dependent glyceraldehyde-3-phosphate dehydrogenase EC 1.2.1.12                                                 |
| Aggregatibacter aphrophilus | VBIAggAph86045_1540  | NAD-dependent glyceraldehyde-3-phosphate dehydrogenase EC 1.2.1.12                                                 |

Table S8

|                             |                      |                                                                                                                   |
|-----------------------------|----------------------|-------------------------------------------------------------------------------------------------------------------|
| Aggregatibacter aphrophilus | VBIAggAph86045_0020  | NAD-dependent glyceraldehyde-3-phosphate dehydrogenase EC 1.2.1.12                                                |
| Aggregatibacter aphrophilus | VBIAggAph86045_0176  | NAD-dependent glyceraldehyde-3-phosphate dehydrogenase EC 1.2.1.12                                                |
| Aggregatibacter aphrophilus | VBIAggAph86045_1850  | Nitrate nitrite response regulator protein                                                                        |
| Aggregatibacter aphrophilus | VBIAggAph86045_0175  | Nucleoside 5-triphosphatase RdgB dHATP 2C dITP 2C XTP-specific EC 3.6.1.15                                        |
| Aggregatibacter aphrophilus | VBIAggAph86045_0904  | Outer membrane protein A precursor                                                                                |
| Aggregatibacter aphrophilus | VBIAggAph86045_0564  | Outer membrane protein A precursor                                                                                |
| Aggregatibacter aphrophilus | VBIAggAph86045_0865  | Outer membrane protein assembly factor YaeT precursor                                                             |
| Aggregatibacter aphrophilus | VBIAggAph86045_0550  | Outer membrane receptor proteins 2C mostly Fe transport                                                           |
| Aggregatibacter aphrophilus | VBIAggAph86045_0853  | Phosphatidate cytidyltransferase EC 2.7.7.41                                                                      |
| Aggregatibacter aphrophilus | VBIAggAph86045_0392  | Phosphomannomutase EC 5.4.2.8                                                                                     |
| Aggregatibacter aphrophilus | VBIAggAph86045_0587  | Protein export cytoplasm protein SecA ATPase RNA helicase TC 3.A.5.1.1                                            |
| Aggregatibacter aphrophilus | VBIAggAph86045_2046  | Protein export cytoplasm protein SecA ATPase RNA helicase TC 3.A.5.1.1                                            |
| Aggregatibacter aphrophilus | VBIAggAph86045_0028  | Putative ABC transporter of substrate X 2C ATP-binding subunit                                                    |
| Aggregatibacter aphrophilus | VBIAggAph86045_1539  | Putative secretion ATPase                                                                                         |
| Aggregatibacter aphrophilus | VBIAggAph86045_1836  | Putrescine transport ATP-binding protein PotA TC 3.A.1.11.1                                                       |
| Aggregatibacter aphrophilus | VBIAggAph86045_1425  | Putrescine transport ATP-binding protein PotA TC 3.A.1.11.1                                                       |
| Aggregatibacter aphrophilus | VBIAggAph86045_1213  | Ribose ABC transport system 2C ATP-binding protein RbsA TC 3.A.1.2.1                                              |
| Aggregatibacter aphrophilus | VBIAggAph86045_2084  | RNA polymerase sigma factor RpoE                                                                                  |
| Aggregatibacter aphrophilus | VBIAggAph86045_1143  | RNA polymerase sigma factor RpoE                                                                                  |
| Aggregatibacter aphrophilus | VBIAggAph86045_0246  | RNA polymerase sigma factor RpoE                                                                                  |
| Aggregatibacter aphrophilus | VBIAggAph86045_1295  | RNA polymerase sigma factor RpoH                                                                                  |
| Aggregatibacter aphrophilus | VBIAggAph86045_0249  | RTX toxins determinant A and related Ca <sup>2+</sup> -binding proteins                                           |
| Aggregatibacter aphrophilus | VBIAggAph86045_1329  | Tetraacyldisaccharide 4'-kinase EC 2.7.1.130                                                                      |
| Aggregatibacter aphrophilus | VBIAggAph86045_1450  | Thiamin ABC transporter 2C ATPase component Thiamine transport ATP-binding protein thiQ                           |
| Aggregatibacter aphrophilus | VBIAggAph86045_1745  | Translation elongation factor Tu                                                                                  |
| Aggregatibacter aphrophilus | VBIAggAph86045_1187  | Translation elongation factor Tu                                                                                  |
| Aggregatibacter aphrophilus | VBIAggAph86045_0376  | Transport ATP-binding protein CydC                                                                                |
| Aggregatibacter aphrophilus | VBIAggAph86045_0197  | Type II IV secretion system ATP hydrolase TadA VirB11 CpaF 2C TadA subfamily                                      |
| Aggregatibacter aphrophilus | VBIAggAph86045_1029  | Type II IV secretion system ATP hydrolase TadA VirB11 CpaF 2C TadA subfamily                                      |
| Aggregatibacter aphrophilus | VBIAggAph86045_1867  | Type II IV secretion system ATP hydrolase TadA VirB11 CpaF 2C TadA subfamily                                      |
| Aggregatibacter aphrophilus | VBIAggAph86045_1075  | Type II IV secretion system ATPase TadZ CpaE 2C associated with Flp pilus assembly                                |
| Aggregatibacter aphrophilus | VBIAggAph86045_1076  | Type II IV secretion system secretin RcpA CpaC 2C associated with Flp pilus assembly                              |
| Aggregatibacter aphrophilus | VBIAggAph86045_0586  | Type IV pilus biogenesis protein PilQ                                                                             |
| Aggregatibacter aphrophilus | VBIAggAph86045_0742  | UDP-3-O-3-hydroxymyristoyl glucosamine N-acyltransferase EC 2.3.1.-                                               |
| Aggregatibacter aphrophilus | VBIAggAph86045_1737  | UDP-3-O-3-hydroxymyristoyl glucosamine N-acyltransferase EC 2.3.1.-                                               |
| Aggregatibacter aphrophilus | VBIAggAph86045_0296  | Undecaprenyl-phosphate galactosephosphotransferase EC 2.7.8.6                                                     |
| Aggregatibacter aphrophilus | VBIAggAph86045_1188  | Uroporphyrinogen-III methyltransferase EC 2.1.1.107                                                               |
| Aggregatibacter aphrophilus | VBIAggAph86045_0390  | UTP--glucose-1-phosphate uridylyltransferase EC 2.7.7.9                                                           |
| Aggregatibacter aphrophilus | VBIAggAph86045_1300  | VgrG protein                                                                                                      |
| Aggregatibacter aphrophilus | VBIAggAph86045_0127  | Vitamin B12 ABC transporter 2C permease component BtuC                                                            |
| Aggregatibacter segnis      | VBIAggSeg171182_1556 | 3-deoxy-D-manno-octulosonic acid kinase EC 2.7.1.-                                                                |
| Aggregatibacter segnis      | VBIAggSeg171182_1027 | 3-deoxy-manno-octulosonate cytidyltransferase EC 2.7.7.38                                                         |
| Aggregatibacter segnis      | VBIAggSeg171182_1205 | 3-oxoacyl-acyl-carrier-protein synthase 2C KASI EC 2.3.1.41                                                       |
| Aggregatibacter segnis      | VBIAggSeg171182_0162 | ABC transporter involved in cytochrome c biogenesis 2C ATPase component CcmA                                      |
| Aggregatibacter segnis      | VBIAggSeg171182_0978 | ABC-type multidrug transport system 2C permease component                                                         |
| Aggregatibacter segnis      | VBIAggSeg171182_0948 | ABC-type multidrug transport system 2C permease component                                                         |
| Aggregatibacter segnis      | VBIAggSeg171182_1314 | Acyl-acyl-carrier-protein--UDP-N- acetylglucosamine O-acyltransferase EC 2.3.1.129                                |
| Aggregatibacter segnis      | VBIAggSeg171182_1613 | ADP-heptose--lipooligosaccharide heptosyltransferase II EC 2.4.1.-                                                |
| Aggregatibacter segnis      | VBIAggSeg171182_1469 | ADP-heptose--lipooligosaccharide heptosyltransferase II EC 2.4.1.-                                                |
| Aggregatibacter segnis      | VBIAggSeg171182_1264 | Aerobic respiration control protein arcA                                                                          |
| Aggregatibacter segnis      | VBIAggSeg171182_1188 | Aerobic respiration control sensor protein arcB EC 2.7.3.-                                                        |
| Aggregatibacter segnis      | VBIAggSeg171182_0541 | Arginine ABC transporter 2C ATP-binding protein ArtP                                                              |
| Aggregatibacter segnis      | VBIAggSeg171182_0580 | Arginine ABC transporter 2C permease protein ArtQ                                                                 |
| Aggregatibacter segnis      | VBIAggSeg171182_0255 | Cell envelope opacity-associated protein A                                                                        |
| Aggregatibacter segnis      | VBIAggSeg171182_1702 | ClpB protein                                                                                                      |
| Aggregatibacter segnis      | VBIAggSeg171182_0022 | Coproporphyrinogen III oxidase 2C oxygen-independent EC 1.3.99.22                                                 |
| Aggregatibacter segnis      | VBIAggSeg171182_0210 | Cytochrome c heme lyase subunit CcmF                                                                              |
| Aggregatibacter segnis      | VBIAggSeg171182_0166 | Cytochrome c-type biogenesis protein CcmC 2C putative heme lyase for CcmE                                         |
| Aggregatibacter segnis      | VBIAggSeg171182_0208 | Cytochrome c-type biogenesis protein CcmE 2C heme chaperone                                                       |
| Aggregatibacter segnis      | VBIAggSeg171182_0910 | Dca                                                                                                               |
| Aggregatibacter segnis      | VBIAggSeg171182_0379 | Dca                                                                                                               |
| Aggregatibacter segnis      | VBIAggSeg171182_1732 | Enolase EC 4.2.1.11                                                                                               |
| Aggregatibacter segnis      | VBIAggSeg171182_1137 | Ferric anguibactin transport system permease protein fatD                                                         |
| Aggregatibacter segnis      | VBIAggSeg171182_1587 | Ferric iron ABC transporter 2C ATP-binding protein                                                                |
| Aggregatibacter segnis      | VBIAggSeg171182_1562 | Ferric iron ABC transporter 2C iron-binding protein                                                               |
| Aggregatibacter segnis      | VBIAggSeg171182_1582 | Ferric iron ABC transporter 2C permease protein                                                                   |
| Aggregatibacter segnis      | VBIAggSeg171182_1024 | Ferrichrome-iron receptor                                                                                         |
| Aggregatibacter segnis      | VBIAggSeg171182_0008 | FIG00641944 hypothetical protein                                                                                  |
| Aggregatibacter segnis      | VBIAggSeg171182_0497 | Flp pilus assembly protein TadB                                                                                   |
| Aggregatibacter segnis      | VBIAggSeg171182_0426 | Flp pilus assembly protein TadD 2C contains TPR repeat                                                            |
| Aggregatibacter segnis      | VBIAggSeg171182_0820 | Gamma-glutamyltranspeptidase EC 2.3.2.2                                                                           |
| Aggregatibacter segnis      | VBIAggSeg171182_0892 | Glutamate-1-semialdehyde aminotransferase EC 5.4.3.8                                                              |
| Aggregatibacter segnis      | VBIAggSeg171182_0801 | Glutamyl-tRNA reductase EC 1.2.1.70                                                                               |
| Aggregatibacter segnis      | VBIAggSeg171182_0930 | Glycosyltransferases involved in cell wall biogenesis                                                             |
| Aggregatibacter segnis      | VBIAggSeg171182_1288 | GTP pyrophosphokinase EC 2.7.6.5 2C pppGpp synthetase II Guanosine-3' 2C5'-bisdiphosphate 3'-pyrophosphohydrolyla |
| Aggregatibacter segnis      | VBIAggSeg171182_1754 | Hcp                                                                                                               |
| Aggregatibacter segnis      | VBIAggSeg171182_1614 | Heat shock protein 60 family chaperone GroEL                                                                      |
| Aggregatibacter segnis      | VBIAggSeg171182_1313 | Hemolysins and related proteins containing CBS domains                                                            |
| Aggregatibacter segnis      | VBIAggSeg171182_1338 | Homolog of E. coli HemY protein                                                                                   |

|                              |                       |                                                                                            |
|------------------------------|-----------------------|--------------------------------------------------------------------------------------------|
| Aggregatibacter segnis       | VBIAggSeg171182_0365  | hypothetical protein                                                                       |
| Aggregatibacter segnis       | VBIAggSeg171182_0834  | hypothetical protein                                                                       |
| Aggregatibacter segnis       | VBIAggSeg171182_1889  | IcmF-related protein                                                                       |
| Aggregatibacter segnis       | VBIAggSeg171182_1706  | Imidazole glycerol phosphate synthase cyclase subunit EC 4.1.3.-                           |
| Aggregatibacter segnis       | VBIAggSeg171182_1230  | <b>Iron (III) dicitrate transport system permease protein FecD TC 3.A.1.14.1</b>           |
| Aggregatibacter segnis       | VBIAggSeg171182_1136  | <b>Iron compound ABC uptake transporter substrate-binding protein PiuA</b>                 |
| Aggregatibacter segnis       | VBIAggSeg171182_1289  | Leader peptidase Prepilin peptidase EC 3.4.23.43 N-methyltransferase EC 2.1.1.-            |
| Aggregatibacter segnis       | VBIAggSeg171182_1026  | <b>Lipid A export ATP-binding permease protein MsbA EC 3.6.3.25</b>                        |
| Aggregatibacter segnis       | VBIAggSeg171182_0055  | Lipooligosaccharide biosynthesis protein lex-1 EC 2.-.-.-                                  |
| Aggregatibacter segnis       | VBIAggSeg171182_1049  | Long-chain-fatty-acid-CoA ligase EC 6.2.1.3                                                |
| Aggregatibacter segnis       | VBIAggSeg171182_0594  | Magnesium and cobalt efflux protein CorC                                                   |
| Aggregatibacter segnis       | VBIAggSeg171182_1025  | Maltose maltodextrin transport ATP-binding protein MalK EC 3.6.3.19                        |
| Aggregatibacter segnis       | VBIAggSeg171182_0799  | Manganese ABC transporter 2C inner membrane permease protein SitC                          |
| Aggregatibacter segnis       | VBIAggSeg171182_0794  | Manganese ABC transporter 2C inner membrane permease protein SitD                          |
| Aggregatibacter segnis       | VBIAggSeg171182_0131  | Manganese superoxide dismutase EC 1.15.1.1                                                 |
| Aggregatibacter segnis       | VBIAggSeg171182_1319  | Membrane-associated zinc metalloprotease                                                   |
| Aggregatibacter segnis       | VBIAggSeg171182_0933  | Membrane-bound lytic murein transglycosylase B precursor EC 3.2.1.-                        |
| Aggregatibacter segnis       | VBIAggSeg171182_1135  | Molybdenum transport ATP-binding protein ModC TC 3.A.1.8.1                                 |
| Aggregatibacter segnis       | VBIAggSeg171182_1271  | NAD-dependent glyceraldehyde-3-phosphate dehydrogenase EC 1.2.1.12                         |
| Aggregatibacter segnis       | VBIAggSeg171182_0946  | O-antigen export system permease protein RfbD                                              |
| Aggregatibacter segnis       | VBIAggSeg171182_1231  | Oligopeptide ABC transporter 2C periplasmic oligopeptide-binding protein OppA TC 3.A.1.5.1 |
| Aggregatibacter segnis       | VBIAggSeg171182_0918  | Oligopeptide ABC transporter 2C periplasmic oligopeptide-binding protein OppA TC 3.A.1.5.1 |
| Aggregatibacter segnis       | VBIAggSeg171182_0113  | Oligopeptide transport ATP-binding protein OppD TC 3.A.1.5.1                               |
| Aggregatibacter segnis       | VBIAggSeg171182_0776  | Outer membrane lipoprotein LolB precursor                                                  |
| Aggregatibacter segnis       | VBIAggSeg171182_0793  | Outer membrane lipoprotein LolB precursor                                                  |
| Aggregatibacter segnis       | VBIAggSeg171182_0983  | Outer membrane protein A precursor                                                         |
| Aggregatibacter segnis       | VBIAggSeg171182_0851  | Outer membrane protein A precursor                                                         |
| Aggregatibacter segnis       | VBIAggSeg171182_1138  | Outer membrane stress sensor protease DegQ 2C serine protease                              |
| Aggregatibacter segnis       | VBIAggSeg171182_1464  | Porphobilinogen deaminase EC 2.5.1.61                                                      |
| Aggregatibacter segnis       | VBIAggSeg171182_1842  | Protein ImpG Vasa                                                                          |
| Aggregatibacter segnis       | VBIAggSeg171182_1169  | putative adhesin invasin                                                                   |
| Aggregatibacter segnis       | VBIAggSeg171182_0324  | Pyrraline-5-carboxylate reductase EC 1.5.1.2                                               |
| Aggregatibacter segnis       | VBIAggSeg171182_1902  | RNA polymerase sigma factor RpoE                                                           |
| Aggregatibacter segnis       | VBIAggSeg171182_0253  | Superoxide dismutase Cu-Zn precursor EC 1.15.1.1                                           |
| Aggregatibacter segnis       | VBIAggSeg171182_0909  | Transcriptional repressor protein TyrR                                                     |
| Aggregatibacter segnis       | VBIAggSeg171182_1058  | Transport ATP-binding protein CydC                                                         |
| Aggregatibacter segnis       | VBIAggSeg171182_0503  | Type II IV secretion system ATP hydrolase TadA VirB11 CpaF 2C TadA subfamily               |
| Aggregatibacter segnis       | VBIAggSeg171182_0492  | Type II IV secretion system protein TadC 2C associated with Flp pilus assembly             |
| Aggregatibacter segnis       | VBIAggSeg171182_0525  | Type II IV secretion system secretin RcpA CpaC 2C associated with Flp pilus assembly       |
| Aggregatibacter segnis       | VBIAggSeg171182_1316  | <b>UDP-3-O-3-hydroxymyristoyl glucosamine N-acyltransferase EC 2.3.1.-</b>                 |
| Aggregatibacter segnis       | VBIAggSeg171182_0581  | <b>UDP-3-O-3-hydroxymyristoyl N-acetylglucosamine deacetylase EC 3.5.1.-</b>               |
| Aggregatibacter segnis       | VBIAggSeg171182_0596  | UDP-glucose dehydrogenase EC 1.1.1.22                                                      |
| Aggregatibacter segnis       | VBIAggSeg171182_0947  | Undecaprenyl-phosphate galactosephosphotransferase EC 2.7.8.6                              |
| Aggregatibacter segnis       | VBIAggSeg171182_0905  | Undecaprenyl-phosphate N-acetylglucosaminyl 1-phosphate transferase EC 2.7.8.-             |
| Aggregatibacter segnis       | VBIAggSeg171182_1748  | Uroporphyrinogen III decarboxylase EC 4.1.1.37                                             |
| Aggregatibacter segnis       | VBIAggSeg171182_1391  | Uroporphyrinogen-III methyltransferase EC 2.1.1.107                                        |
| Aggregatibacter segnis       | VBIAggSeg171182_1395  | Uroporphyrinogen-III synthase EC 4.2.1.75                                                  |
| Aggregatibacter segnis       | VBIAggSeg171182_1743  | UTP-glucose-1-phosphate uridylyltransferase EC 2.7.7.9                                     |
| Aggregatibacter segnis       | VBIAggSeg171182_0728  | VgrG protein                                                                               |
| Aggregatibacter segnis       | VBIAggSeg171182_0670  | VgrG protein                                                                               |
| Agrobacterium tumefaciens    | VBIAgrTum91616_3514   | ABC transporter ATP-binding protein                                                        |
| Agrobacterium tumefaciens    | VBIAgrTum91616_3962   | Transport ATP-binding protein CydD                                                         |
| Arcanobacterium haemolyticum | VBIArcHae78728_1585   | 3-deoxy-D-manno-octulosonic-acid transferase EC 2.-.-.-                                    |
| Arcanobacterium haemolyticum | VBIArcHae78728_0497   | ABC-type polar amino acid transport system 2C ATPase component                             |
| Arcanobacterium haemolyticum | VBIArcHae78728_0360   | ADP-L-glycero-D-manno-heptose-6-epimerase EC 5.1.3.20                                      |
| Arcanobacterium haemolyticum | VBIArcHae78728_0055   | ATP synthase alpha chain EC 3.6.3.14                                                       |
| Arcanobacterium haemolyticum | VBIArcHae78728_0102   | ATP synthase beta chain EC 3.6.3.14                                                        |
| Arcanobacterium haemolyticum | VBIArcHae78728_1181   | D-glycero-D-manno-heptose 1 2C7-bisphosphate phosphatase EC 3.1.1.-                        |
| Arcanobacterium haemolyticum | VBIArcHae78728_0626   | FKBP-type peptidyl-prolyl cis-trans isomerase FkpA precursor EC 5.2.1.8                    |
| Arcanobacterium haemolyticum | VBIArcHae78728_1353   | <b>Lipopolysaccharide biosynthesis glycosyltransferase</b>                                 |
| Arcanobacterium haemolyticum | VBIArcHae78728_1105   | Methionine ABC transporter ATP-binding protein                                             |
| Arcanobacterium haemolyticum | VBIArcHae78728_0766   | <b>TonB-dependent hemin 2C ferrichrome receptor</b>                                        |
| Atopobium rimae              | VBIAtoRim14338_1472   | Type IV pilus biogenesis protein PilQ                                                      |
| Atopobium vaginae            | VBIAtoVag168076_0418  | adhesion and penetration protein Hap                                                       |
| Atopobium vaginae            | VBIAtoVag168076_0571  | adhesion and penetration protein Hap                                                       |
| Atopobium vaginae            | VBIAtoVag85223_0915   | Cell envelope opacity-associated protein A                                                 |
| Atopobium vaginae            | VBIAtoVag168076_0138  | Menaquinone-specific isochorismate synthase EC 5.4.4.2                                     |
| Atopobium vaginae            | VBIAtoVag85223_0939   | Nucleoside 5-triphosphatase RdgB dHATP 2C dTTP 2C XTP-specific EC 3.6.1.15                 |
| Atopobium vaginae            | VBIAtoVag85223_0142   | Phosphoglucosamine mutase EC 5.4.2.10                                                      |
| Atopobium vaginae            | VBIAtoVag85223_1014   | Radical SAM family enzyme 2C similar to coproporphyrinogen III oxidase RdgB                |
| Atopobium vaginae            | VBIAtoVag168076_0084  | RNA polymerase sigma factor RpoD                                                           |
| Atopobium vaginae            | VBIAtoVag168076_0193  | S-ribosylhomocysteine lyase EC 4.4.1.21 Autoinducer-2 production protein LuxS              |
| Atopobium vaginae            | VBIAtoVag85223_0351   | Superoxide dismutase Cu-Zn precursor EC 1.15.1.1                                           |
| Atopobium vaginae            | VBIAtoVag85223_0349   | Type IV fimbrial assembly 2C ATPase PilB                                                   |
| Atopobium vaginae            | VBIAtoVag85223_0713   | UDP-2 2C3-diacetylglucosamine hydrolase EC 3.6.1.-                                         |
| Bacillus anthracis           | VBI BacAnt86373_5500  | ABC transporter 2C ATP-binding protein                                                     |
| Bacillus anthracis           | VBI BacAnt86373_2824  | ABC transporter ATP-binding protein                                                        |
| Bacillus anthracis           | VBI BacAnt108183_3959 | ABC-type polar amino acid transport system 2C ATPase component                             |
| Bacillus anthracis           | VBI BacAnt108183_5377 | ADP-L-glycero-D-manno-heptose-6-epimerase EC 5.1.3.20                                      |

Table S8

|                    |                      |                                                                                                                 |
|--------------------|----------------------|-----------------------------------------------------------------------------------------------------------------|
| Bacillus anthracis | VBIBacAnt108183_0399 | amino acid ABC transporter 2C ATP-binding protein                                                               |
| Bacillus anthracis | VBIBacAnt108183_5560 | Diaminopimelate decarboxylase EC 4.1.1.20                                                                       |
| Bacillus anthracis | VBIBacAnt108183_1157 | Ferric iron ABC transporter 2C ATP-binding protein                                                              |
| Bacillus anthracis | VBIBacAnt108183_5216 | FKBP-type peptidyl-prolyl cis-trans isomerase FkpA precursor EC 5.2.1.8                                         |
| Bacillus anthracis | VBIBacAnt108183_1456 | Methionyl-tRNA formyltransferase EC 2.1.2.9                                                                     |
| Bacillus anthracis | VBIBacAnt108183_3892 | Phosphomannomutase EC 5.4.2.8                                                                                   |
| Bacillus anthracis | VBIBacAnt108183_1802 | Protein export cytoplasm protein SecA ATPase RNA helicase TC 3.A.5.1.1                                          |
| Bacillus anthracis | VBIBacAnt86373_4637  | RNA polymerase sigma factor RpoE                                                                                |
| Bacillus anthracis | VBIBacAnt86373_4955  | Sigma factor RpoE negative regulatory protein RseB precursor                                                    |
| Bacillus anthracis | VBIBacAnt108183_0136 | TonB-dependent receptor                                                                                         |
| Bacillus anthracis | VBIBacAnt86373_1287  | Transport ATP-binding protein CydD                                                                              |
| Bacillus anthracis | VBIBacAnt86373_5570  | Type IV pilus biogenesis protein PilQ                                                                           |
| Bacillus clausii   | VBIBacCla58185_2200  | 3-oxoacyl-acyl-carrier protein reductase EC 1.1.1.100                                                           |
| Bacillus clausii   | VBIBacCla58185_0940  | 3R-hydroxymyristoyl-acyl carrier protein dehydratase EC 4.2.1.-                                                 |
| Bacillus clausii   | VBIBacCla58185_2753  | ABC transporter involved in cytochrome c biogenesis 2C ATPase component CcmA                                    |
| Bacillus clausii   | VBIBacCla58185_4244  | Cell division trigger factor EC 5.2.1.8                                                                         |
| Bacillus clausii   | VBIBacCla58185_3439  | Cytochrome c heme lyase subunit CcmF                                                                            |
| Bacillus clausii   | VBIBacCla58185_2755  | Cytochrome c-type biogenesis protein CcmE 2C heme chaperone                                                     |
| Bacillus clausii   | VBIBacCla58185_3786  | Cytochrome c-type heme lyase subunit nrfE 2C nitrite reductase complex assembly                                 |
| Bacillus clausii   | VBIBacCla58185_1315  | FKBP-type peptidyl-prolyl cis-trans isomerase fKlB EC 5.2.1.8                                                   |
| Bacillus clausii   | VBIBacCla58185_0128  | Hemolysins and related proteins containing CBS domains                                                          |
| Bacillus clausii   | VBIBacCla58185_1058  | Lipid-A-disaccharide synthase EC 2.4.1.182                                                                      |
| Bacillus clausii   | VBIBacCla58185_2577  | Menaquinone-specific isochorismate synthase EC 5.4.4.2                                                          |
| Bacillus clausii   | VBIBacCla58185_2576  | Peptidyl-prolyl cis-trans isomerase ppiB EC 5.2.1.8                                                             |
| Bacillus clausii   | VBIBacCla58185_0718  | Phosphatidate cytidyltransferase EC 2.7.7.41                                                                    |
| Bacillus clausii   | VBIBacCla58185_3998  | Pyrraline-5-carboxylate reductase EC 1.5.1.2                                                                    |
| Bacillus clausii   | VBIBacCla58185_0264  | Undecaprenyl pyrophosphate synthetase EC 2.5.1.31                                                               |
| Bacillus subtilis  | VBIBacSub57968_0437  | 2-Keto-3-deoxy-D-manno-octulosonate-8-phosphate synthase EC 2.5.1.55                                            |
| Bacillus subtilis  | VBIBacSub33497_2669  | 3-oxoacyl-acyl-carrier-protein synthase 2C KASI EC 2.3.1.41                                                     |
| Bacillus subtilis  | VBIBacSub57968_1928  | ABC transporter related                                                                                         |
| Bacillus subtilis  | VBIBacSub57968_3095  | ADP-heptose synthase EC 2.7.-.- D-glycero-beta-D-manno-heptose 7-phosphate kinase                               |
| Bacillus subtilis  | VBIBacSub93915_0264  | Aerobic respiration control protein arca                                                                        |
| Bacillus subtilis  | VBIBacSub93915_2594  | Alcohol dehydrogenase EC 1.1.1.1 3B Acetaldehyde dehydrogenase EC 1.2.1.10                                      |
| Bacillus subtilis  | VBIBacSub33497_1768  | Arginine ABC transporter 2C ATP-binding protein ArtP                                                            |
| Bacillus subtilis  | VBIBacSub93915_2767  | ATP synthase alpha chain EC 3.6.3.14                                                                            |
| Bacillus subtilis  | VBIBacSub93915_2777  | ATP synthase beta chain EC 3.6.3.14                                                                             |
| Bacillus subtilis  | VBIBacSub93915_3851  | ATPase component of general energizing module of ECF transporters                                               |
| Bacillus subtilis  | VBIBacSub93915_2677  | CipB protein                                                                                                    |
| Bacillus subtilis  | VBIBacSub33497_0411  | COG1132 ABC-type multidrug transport system 2C ATPase and permease components                                   |
| Bacillus subtilis  | VBIBacSub93915_0964  | Dipeptide transport ATP-binding protein DppF TC 3.A.1.5.2                                                       |
| Bacillus subtilis  | VBIBacSub93915_2807  | Enolase EC 4.2.1.11                                                                                             |
| Bacillus subtilis  | VBIBacSub93915_2694  | Enolase EC 4.2.1.11                                                                                             |
| Bacillus subtilis  | VBIBacSub93915_0194  | ferric ABC transporter ATP-binding protein                                                                      |
| Bacillus subtilis  | VBIBacSub33497_0183  | Ferric vulnibactin receptor VuuA                                                                                |
| Bacillus subtilis  | VBIBacSub57968_1638  | FIG00782388 hypothetical protein                                                                                |
| Bacillus subtilis  | VBIBacSub57968_1483  | Glycosyltransferases involved in cell wall biogenesis                                                           |
| Bacillus subtilis  | VBIBacSub33497_1766  | GTP pyrophosphokinase EC 2.7.6.5 2C pppGpp synthetase II Guanosine-3' 2C5'-bisdiphosphate 3'-pyrophosphohydrola |
| Bacillus subtilis  | VBIBacSub93915_1641  | Heat shock protein 60 family chaperone GroEL                                                                    |
| Bacillus subtilis  | VBIBacSub93915_2745  | Heat shock protein 60 family chaperone GroEL                                                                    |
| Bacillus subtilis  | VBIBacSub93915_2195  | hypothetical protein                                                                                            |
| Bacillus subtilis  | VBIBacSub57968_3395  | hypothetical protein                                                                                            |
| Bacillus subtilis  | VBIBacSub93915_1894  | hypothetical protein                                                                                            |
| Bacillus subtilis  | VBIBacSub33497_0451  | Inner membrane ABC-transporter YbtQ                                                                             |
| Bacillus subtilis  | VBIBacSub33497_1991  | Iron (III) dicitrate transport ATP-binding protein FecE TC 3.A.1.14.1                                           |
| Bacillus subtilis  | VBIBacSub57968_4110  | Iron compound ABC uptake transporter substrate-binding protein PiuA                                             |
| Bacillus subtilis  | VBIBacSub33497_3788  | Lipid A biosynthesis KDO 2-lauroyl-lipid IVA acyltransferase EC 2.3.1.-                                         |
| Bacillus subtilis  | VBIBacSub57968_3173  | Lipid A biosynthesis lauroyl acyltransferase EC 2.3.1.-                                                         |
| Bacillus subtilis  | VBIBacSub57968_1990  | Lipoprotein releasing system ATP-binding protein LolD                                                           |
| Bacillus subtilis  | VBIBacSub33497_2921  | Magnesium and cobalt efflux protein CorC                                                                        |
| Bacillus subtilis  | VBIBacSub93915_0732  | Malonyl CoA-acyl carrier protein transacylase EC 2.3.1.39                                                       |
| Bacillus subtilis  | VBIBacSub33497_3720  | Manganese ABC transporter 2C ATP-binding protein SitB                                                           |
| Bacillus subtilis  | VBIBacSub33497_3620  | Manganese ABC transporter 2C inner membrane permease protein SitC                                               |
| Bacillus subtilis  | VBIBacSub33497_3221  | Manganese ABC transporter 2C inner membrane permease protein SitD                                               |
| Bacillus subtilis  | VBIBacSub33497_3740  | Manganese ABC transporter 2C periplasmic-binding protein SitA                                                   |
| Bacillus subtilis  | VBIBacSub33497_3805  | Mannose-6-phosphate isomerase EC 5.3.1.8                                                                        |
| Bacillus subtilis  | VBIBacSub57968_1499  | Membrane-bound lytic murein transglycosylase B precursor EC 3.2.1.-                                             |
| Bacillus subtilis  | VBIBacSub57968_2526  | Molybdenum transport ATP-binding protein ModC TC 3.A.1.8.1                                                      |
| Bacillus subtilis  | VBIBacSub93915_2533  | NAD-dependent glyceraldehyde-3-phosphate dehydrogenase EC 1.2.1.12                                              |
| Bacillus subtilis  | VBIBacSub93915_2714  | Oligopeptide transport ATP-binding protein OppF TC 3.A.1.5.1                                                    |
| Bacillus subtilis  | VBIBacSub93915_3012  | Ornithine carbamoyltransferase EC 2.1.3.3                                                                       |
| Bacillus subtilis  | VBIBacSub93915_0206  | Outer membrane receptor proteins 2C mostly Fe transport                                                         |
| Bacillus subtilis  | VBIBacSub57968_2871  | Outer membrane stress sensor protease DegS                                                                      |
| Bacillus subtilis  | VBIBacSub57968_0471  | Phosphoglucosamine mutase EC 5.4.2.10                                                                           |
| Bacillus subtilis  | VBIBacSub57968_4037  | Phosphoribosylaminoimidazole-succinocarboxamide synthase EC 6.3.2.6                                             |
| Bacillus subtilis  | VBIBacSub93915_3381  | putative ABC-transporter                                                                                        |
| Bacillus subtilis  | VBIBacSub57968_3593  | Thiamin ABC transporter 2C ATPase component Thiamine transport ATP-binding protein thiQ                         |
| Bacillus subtilis  | VBIBacSub33497_4039  | Transcriptional repressor protein TyrR                                                                          |
| Bacillus subtilis  | VBIBacSub93915_2781  | Translation elongation factor Tu                                                                                |
| Bacillus subtilis  | VBIBacSub33497_4258  | Transport ATP-binding protein CydC                                                                              |

Table S8

|                              |                      |                                                                                                           |
|------------------------------|----------------------|-----------------------------------------------------------------------------------------------------------|
| Bacillus subtilis            | VBIBacSub57968_0090  | Transport ATP-binding protein CydD                                                                        |
| Bacillus subtilis            | VBIBacSub57968_4070  | Two-component system response regulator QseB                                                              |
| Bacillus subtilis            | VBIBacSub57968_3263  | UDP-glucose 4-epimerase EC 5.1.3.2                                                                        |
| Bacillus subtilis            | VBIBacSub93915_0746  | UDP-glucuronate 5-epimerase EC 5.1.3.12                                                                   |
| Bacteroidetes oral taxon 274 | VBIBacOra127278_1197 | 2 2C3 2C4 2C5-tetrahydropyridine-2 2C6-dicarboxylate N-acetyltransferase EC 2.3.1.89                      |
| Bacteroidetes oral taxon 274 | VBIBacOra127278_0460 | 2-deoxy-D-gluconate 3-dehydrogenase EC 1.1.1.125                                                          |
| Bacteroidetes oral taxon 274 | VBIBacOra127278_0575 | 3-oxoacyl-acyl-carrier protein reductase EC 1.1.1.100                                                     |
| Bacteroidetes oral taxon 274 | VBIBacOra127278_0335 | 3-oxoacyl-acyl-carrier protein reductase EC 1.1.1.100                                                     |
| Bacteroidetes oral taxon 274 | VBIBacOra127278_0275 | 3-oxoacyl-acyl-carrier protein reductase EC 1.1.1.100                                                     |
| Bacteroidetes oral taxon 274 | VBIBacOra127278_0154 | 3-oxoacyl-acyl-carrier protein reductase EC 1.1.1.100                                                     |
| Bacteroidetes oral taxon 274 | VBIBacOra127278_0638 | 3-oxoacyl-acyl-carrier protein reductase EC 1.1.1.100                                                     |
| Bacteroidetes oral taxon 274 | VBIBacOra127278_0193 | 3-oxoacyl-acyl-carrier protein reductase EC 1.1.1.100                                                     |
| Bacteroidetes oral taxon 274 | VBIBacOra127278_0721 | ABC transporter 2C ATP-binding protein                                                                    |
| Bacteroidetes oral taxon 274 | VBIBacOra127278_1309 | ABC transporter 2C ATP-binding protein 2C putative                                                        |
| Bacteroidetes oral taxon 274 | VBIBacOra127278_1290 | ABC transporter ATP-binding protein                                                                       |
| Bacteroidetes oral taxon 274 | VBIBacOra127278_0495 | Aspartate 1-decarboxylase EC 4.1.1.11                                                                     |
| Bacteroidetes oral taxon 274 | VBIBacOra127278_0783 | Aspartate 1-decarboxylase EC 4.1.1.11                                                                     |
| Bacteroidetes oral taxon 274 | VBIBacOra127278_0358 | ATP-dependent Clp protease 2C ATP-binding subunit ClpC Negative regulator of genetic competence clcC mecB |
| Bacteroidetes oral taxon 274 | VBIBacOra127278_0626 | ATP-dependent Clp protease ATP-binding subunit ClpA                                                       |
| Bacteroidetes oral taxon 274 | VBIBacOra127278_0357 | ATPase component of general energizing module of ECF transporters                                         |
| Bacteroidetes oral taxon 274 | VBIBacOra127278_1169 | Beta-1 2C3-glucosyltransferase                                                                            |
| Bacteroidetes oral taxon 274 | VBIBacOra127278_0557 | Branched-chain amino acid transport system permease protein LivM TC 3.A.1.4.1                             |
| Bacteroidetes oral taxon 274 | VBIBacOra127278_0778 | Capsular polysaccharide synthesis protein                                                                 |
| Bacteroidetes oral taxon 274 | VBIBacOra127278_0002 | cation-transporting ATPase 2C E1-E2 family                                                                |
| Bacteroidetes oral taxon 274 | VBIBacOra127278_1714 | cell wall surface anchor family protein                                                                   |
| Bacteroidetes oral taxon 274 | VBIBacOra127278_1723 | cell wall surface anchor family protein                                                                   |
| Bacteroidetes oral taxon 274 | VBIBacOra127278_0098 | ClpB protein                                                                                              |
| Bacteroidetes oral taxon 274 | VBIBacOra127278_0221 | Collagen adhesion protein                                                                                 |
| Bacteroidetes oral taxon 274 | VBIBacOra127278_0243 | Collagen adhesion protein                                                                                 |
| Bacteroidetes oral taxon 274 | VBIBacOra127278_0922 | DNA-binding response regulator                                                                            |
| Bacteroidetes oral taxon 274 | VBIBacOra127278_1323 | dTDP-4-dehydrorhamnose reductase EC 1.1.1.133                                                             |
| Bacteroidetes oral taxon 274 | VBIBacOra127278_0814 | Ferrous iron transport protein B                                                                          |
| Bacteroidetes oral taxon 274 | VBIBacOra127278_0918 | Ferrous iron transport protein B                                                                          |
| Bacteroidetes oral taxon 274 | VBIBacOra127278_0331 | Fibronectin fibrinogen-binding protein                                                                    |
| Bacteroidetes oral taxon 274 | VBIBacOra127278_1192 | FIG00518767 hypothetical protein                                                                          |
| Bacteroidetes oral taxon 274 | VBIBacOra127278_1244 | FKBP-type peptidyl-prolyl cis-trans isomerase fkIB EC 5.2.1.8                                             |
| Bacteroidetes oral taxon 274 | VBIBacOra127278_0745 | glycosyl transferase 2C family 2                                                                          |
| Bacteroidetes oral taxon 274 | VBIBacOra127278_0753 | Glycosyltransferase EC 2.4.1.-                                                                            |
| Bacteroidetes oral taxon 274 | VBIBacOra127278_0395 | Heat shock protein 60 family chaperone GroEL                                                              |
| Bacteroidetes oral taxon 274 | VBIBacOra127278_1165 | Hemolysins and related proteins containing CBS domains                                                    |
| Bacteroidetes oral taxon 274 | VBIBacOra127278_1704 | hypothetical protein                                                                                      |
| Bacteroidetes oral taxon 274 | VBIBacOra127278_1365 | hypothetical protein                                                                                      |
| Bacteroidetes oral taxon 274 | VBIBacOra127278_1167 | hypothetical protein                                                                                      |
| Bacteroidetes oral taxon 274 | VBIBacOra127278_1359 | hypothetical protein                                                                                      |
| Bacteroidetes oral taxon 274 | VBIBacOra127278_1374 | hypothetical protein                                                                                      |
| Bacteroidetes oral taxon 274 | VBIBacOra127278_1700 | hypothetical protein                                                                                      |
| Bacteroidetes oral taxon 274 | VBIBacOra127278_1644 | hypothetical protein                                                                                      |
| Bacteroidetes oral taxon 274 | VBIBacOra127278_1612 | Internalin-like protein LPXTG motif Lmo0331 homolog                                                       |
| Bacteroidetes oral taxon 274 | VBIBacOra127278_1105 | Internalin-like protein LPXTG motif Lmo0331 homolog                                                       |
| Bacteroidetes oral taxon 274 | VBIBacOra127278_1800 | Internalin-like protein LPXTG motif Lmo0331 homolog                                                       |
| Bacteroidetes oral taxon 274 | VBIBacOra127278_1160 | Internalin-like protein LPXTG motif Lmo0331 homolog                                                       |
| Bacteroidetes oral taxon 274 | VBIBacOra127278_1499 | Internalin-like protein LPXTG motif Lmo0331 homolog                                                       |
| Bacteroidetes oral taxon 274 | VBIBacOra127278_1161 | Internalin-like protein LPXTG motif Lmo0331 homolog                                                       |
| Bacteroidetes oral taxon 274 | VBIBacOra127278_1101 | Internalin-like protein LPXTG motif Lmo0331 homolog                                                       |
| Bacteroidetes oral taxon 274 | VBIBacOra127278_1002 | Internalin-like protein LPXTG motif Lmo0331 homolog                                                       |
| Bacteroidetes oral taxon 274 | VBIBacOra127278_1007 | Internalin-like protein LPXTG motif Lmo0331 homolog                                                       |
| Bacteroidetes oral taxon 274 | VBIBacOra127278_1629 | Internalin-like protein LPXTG motif Lmo0331 homolog                                                       |
| Bacteroidetes oral taxon 274 | VBIBacOra127278_1601 | Internalin-like protein LPXTG motif Lmo0331 homolog                                                       |
| Bacteroidetes oral taxon 274 | VBIBacOra127278_0997 | Internalin-like protein LPXTG motif Lmo0331 homolog                                                       |
| Bacteroidetes oral taxon 274 | VBIBacOra127278_1001 | Internalin-like protein LPXTG motif Lmo0331 homolog                                                       |
| Bacteroidetes oral taxon 274 | VBIBacOra127278_1330 | Internalin-like protein LPXTG motif Lmo0331 homolog                                                       |
| Bacteroidetes oral taxon 274 | VBIBacOra127278_1848 | Internalin-like protein LPXTG motif Lmo0331 homolog                                                       |
| Bacteroidetes oral taxon 274 | VBIBacOra127278_1643 | Internalin-like protein LPXTG motif Lmo0331 homolog                                                       |
| Bacteroidetes oral taxon 274 | VBIBacOra127278_1818 | Internalin-like protein LPXTG motif Lmo0331 homolog                                                       |
| Bacteroidetes oral taxon 274 | VBIBacOra127278_1534 | Internalin-like protein LPXTG motif Lmo0331 homolog                                                       |
| Bacteroidetes oral taxon 274 | VBIBacOra127278_1472 | Internalin-like protein LPXTG motif Lmo2821 homolog                                                       |
| Bacteroidetes oral taxon 274 | VBIBacOra127278_1488 | Internalin-like protein LPXTG motif Lmo2821 homolog                                                       |
| Bacteroidetes oral taxon 274 | VBIBacOra127278_1168 | Lipoprotein-releasing system ATP-binding protein lolD                                                     |
| Bacteroidetes oral taxon 274 | VBIBacOra127278_1245 | Mannose-1-phosphate guanylyltransferase GDP EC 2.7.7.22                                                   |
| Bacteroidetes oral taxon 274 | VBIBacOra127278_0602 | Methionyl-tRNA formyltransferase EC 2.1.2.9                                                               |
| Bacteroidetes oral taxon 274 | VBIBacOra127278_0213 | Methyl-accepting chemotaxis protein                                                                       |
| Bacteroidetes oral taxon 274 | VBIBacOra127278_1163 | NAD-dependent glyceraldehyde-3-phosphate dehydrogenase EC 1.2.1.12                                        |
| Bacteroidetes oral taxon 274 | VBIBacOra127278_0274 | Non-hemolytic enterotoxin A                                                                               |
| Bacteroidetes oral taxon 274 | VBIBacOra127278_0139 | Oligopeptide ABC transporter 2C periplasmic oligopeptide-binding protein OppA TC 3.A.1.5.1                |
| Bacteroidetes oral taxon 274 | VBIBacOra127278_0528 | Oligopeptide transport ATP-binding protein OppD TC 3.A.1.5.1                                              |
| Bacteroidetes oral taxon 274 | VBIBacOra127278_0322 | Oligopeptide transport ATP-binding protein OppF TC 3.A.1.5.1                                              |
| Bacteroidetes oral taxon 274 | VBIBacOra127278_0516 | Oligopeptide transport ATP-binding protein OppF TC 3.A.1.5.1                                              |
| Bacteroidetes oral taxon 274 | VBIBacOra127278_1130 | Phosphoglucomutase EC 5.4.2.2                                                                             |
| Bacteroidetes oral taxon 274 | VBIBacOra127278_0214 | Protein export cytoplasm protein SecA ATPase RNA helicase TC 3.A.5.1.1                                    |

Table S8

|                              |                            |                                                                                                           |
|------------------------------|----------------------------|-----------------------------------------------------------------------------------------------------------|
| Bacteroidetes oral taxon 274 | VBIBacOra127278_0120       | sensor histidine kinase                                                                                   |
| Bacteroidetes oral taxon 274 | VBIBacOra127278_0530       | sensory box sensor histidine kinase response regulator VC0622                                             |
| Bacteroidetes oral taxon 274 | VBIBacOra127278_0668       | serine threonine protein kinase                                                                           |
| Bacteroidetes oral taxon 274 | VBIBacOra127278_0717       | serine threonine protein kinase                                                                           |
| Bacteroidetes oral taxon 274 | VBIBacOra127278_0529       | Signal transduction histidine kinase CheA EC 2.7.3.-                                                      |
| Bacteroidetes oral taxon 274 | VBIBacOra127278_0470       | Sulfate and thiosulfate import ATP-binding protein CysA EC 3.6.3.25                                       |
| Bacteroidetes oral taxon 274 | VBIBacOra127278_0382       | two-component response regulator                                                                          |
| Bacteroidetes oral taxon 274 | VBIBacOra127278_1224       | UDP-2-acetamido-2-deoxy-D-glucuronic acid dehydrogenase NAD <sup>+</sup> cofactor                         |
| Bacteroidetes oral taxon 274 | VBIBacOra127278_0581       | UDP-glucose 4-epimerase EC 5.1.3.2                                                                        |
| Bacteroidetes oral taxon 274 | VBIBacOra127278_0586       | Vitamin B12 ABC transporter 2C permease component BtuC                                                    |
| Bifidobacterium breve        | VBIBifBre30019_0658        | 3-oxoacyl-acyl-carrier-protein synthase 2C KASII EC 2.3.1.41                                              |
| Bifidobacterium breve        | VBIBifBre213787_1475       | dTDP-4-dehydrorhamnose 3 2C5-epimerase EC 5.1.3.13                                                        |
| Bifidobacterium breve        | VBIBifBre213787_1886       | dTDP-glucose 4 2C6-dehydratase EC 4.2.1.46                                                                |
| Bifidobacterium breve        | VBIBifBre213787_1959       | Export ABC transporter ATP-binding protein                                                                |
| Bifidobacterium breve        | VBIBifBre213787_0484       | FKBP-type peptidyl-prolyl cis-trans isomerase FkpA precursor EC 5.2.1.8                                   |
| Bifidobacterium breve        | VBIBifBre213787_0491       | Glucose-1-phosphate thymidyltransferase EC 2.7.7.24                                                       |
| <b>Bifidobacterium breve</b> | <b>VBIBifBre30019_1920</b> | <b>Lipid-A-disaccharide synthase EC 2.4.1.182</b>                                                         |
| Bifidobacterium breve        | VBIBifBre30019_0877        | Transcriptional regulatory protein rprY                                                                   |
| Bifidobacterium dentium      | VBIBifDen165269_0781       | 8-amino-7-oxononanoate synthase EC 2.3.1.47                                                               |
| Bifidobacterium dentium      | VBIBifDen119025_0824       | ABC-type multidrug transport system 2C ATPase component                                                   |
| Bifidobacterium dentium      | VBIBifDen165269_0316       | Acyl-acyl-carrier-protein--UDP-N- acetylglucosamine O-acyltransferase EC 2.3.1.129                        |
| Bifidobacterium dentium      | VBIBifDen165269_0203       | Alkyl hydroperoxide reductase protein C EC 1.6.4.-                                                        |
| Bifidobacterium dentium      | VBIBifDen119025_0573       | ATP synthase beta chain EC 3.6.3.14                                                                       |
| Bifidobacterium dentium      | VBIBifDen66312_2115        | Cell envelope-associated transcriptional attenuator LytR-CpsA-Psr 2C subfamily F2 as in PMID19099556      |
| Bifidobacterium dentium      | VBIBifDen119025_0879       | Chain E 2C Thermolysin E.C.3.4.24.27 Complex With Val-Trp Vw                                              |
| Bifidobacterium dentium      | VBIBifDen66312_0157        | Chemotaxis regulator - transmits chemoreceptor signals to flagellar motor components CheY                 |
| Bifidobacterium dentium      | VBIBifDen66312_1931        | cytochrome P450-like enzyme                                                                               |
| Bifidobacterium dentium      | VBIBifDen119025_0388       | Enolase EC 4.2.1.11                                                                                       |
| Bifidobacterium dentium      | VBIBifDen66312_1482        | Enolase EC 4.2.1.11                                                                                       |
| Bifidobacterium dentium      | VBIBifDen66312_0133        | Flagellar motor switch protein FliM                                                                       |
| Bifidobacterium dentium      | VBIBifDen66312_1043        | Glutamate transport ATP-binding protein                                                                   |
| Bifidobacterium dentium      | VBIBifDen119025_0053       | Heat shock protein 60 family chaperone GroEL                                                              |
| Bifidobacterium dentium      | VBIBifDen66312_1656        | Imidazole glycerol phosphate synthase cyclase subunit EC 4.1.3.-                                          |
| Bifidobacterium dentium      | VBIBifDen66312_0660        | Long-chain-fatty-acid--CoA ligase EC 6.2.1.3                                                              |
| Bifidobacterium dentium      | VBIBifDen66312_0705        | Long-chain-fatty-acid--CoA ligase EC 6.2.1.3                                                              |
| Bifidobacterium dentium      | VBIBifDen66312_0040        | Long-chain-fatty-acid--CoA ligase EC 6.2.1.3                                                              |
| Bifidobacterium dentium      | VBIBifDen66312_0480        | Long-chain-fatty-acid--CoA ligase EC 6.2.1.3                                                              |
| Bifidobacterium dentium      | VBIBifDen66312_0235        | Long-chain-fatty-acid--CoA ligase EC 6.2.1.3                                                              |
| Bifidobacterium dentium      | VBIBifDen39005_0031        | Malonyl CoA-acyl carrier protein transacylase EC 2.3.1.39                                                 |
| Bifidobacterium dentium      | VBIBifDen165269_1435       | Malonyl CoA-acyl carrier protein transacylase EC 2.3.1.39                                                 |
| Bifidobacterium dentium      | VBIBifDen165269_2192       | Malonyl CoA-acyl carrier protein transacylase EC 2.3.1.39                                                 |
| Bifidobacterium dentium      | VBIBifDen165269_1315       | Malonyl CoA-acyl carrier protein transacylase EC 2.3.1.39                                                 |
| Bifidobacterium dentium      | VBIBifDen165269_0976       | Malonyl CoA-acyl carrier protein transacylase EC 2.3.1.39                                                 |
| Bifidobacterium dentium      | VBIBifDen66312_0745        | Manganese superoxide dismutase EC 1.15.1.1                                                                |
| Bifidobacterium dentium      | VBIBifDen119025_1018       | Mannose-6-phosphate isomerase EC 5.3.1.8                                                                  |
| Bifidobacterium dentium      | VBIBifDen119025_0974       | Ornithine aminotransferase EC 2.6.1.13 3B Succinylornithine transaminase EC 2.6.1.81                      |
| Bifidobacterium dentium      | VBIBifDen119025_0886       | Pantoate--beta-alanine ligase EC 6.3.2.1                                                                  |
| Bifidobacterium dentium      | VBIBifDen119025_0226       | Phosphatidate cytidyltransferase EC 2.7.7.41                                                              |
| Bifidobacterium dentium      | VBIBifDen39005_1290        | Phosphoglucosamine mutase EC 5.4.2.10                                                                     |
| Bifidobacterium dentium      | VBIBifDen165269_0725       | Protein export cytoplasm protein SecA ATPase RNA helicase TC 3.A.5.1.1                                    |
| Bifidobacterium dentium      | VBIBifDen165269_0369       | Protein export cytoplasm protein SecA ATPase RNA helicase TC 3.A.5.1.1                                    |
| Bifidobacterium dentium      | VBIBifDen66312_1343        | putative cytochrome P450 hydroxylase                                                                      |
| Bifidobacterium dentium      | VBIBifDen119025_2081       | RNA polymerase sigma factor RpoD                                                                          |
| Bifidobacterium dentium      | VBIBifDen119025_1528       | UDP-glucose dehydrogenase EC 1.1.1.22                                                                     |
| Bifidobacterium dentium      | VBIBifDen119025_1298       | UDP-glucose dehydrogenase EC 1.1.1.22                                                                     |
| Bifidobacterium dentium      | VBIBifDen66312_0036        | Uncharacterized iron compound ABC uptake transporter 2C ATP-binding protein                               |
| Bifidobacterium dentium      | VBIBifDen165269_0963       | Undecaprenyl pyrophosphate synthetase EC 2.5.1.31                                                         |
| Bifidobacterium longum       | VBIBifLon171405_1762       | ABC transporter 2C ATP-binding protein                                                                    |
| Bifidobacterium longum       | VBIBifLon171405_1040       | Asparagine synthetase glutamine-hydrolyzing EC 6.3.5.4 AsnH                                               |
| Bifidobacterium longum       | VBIBifLon171405_1540       | ATP-dependent Clp protease 2C ATP-binding subunit ClpC Negative regulator of genetic competence clcC mecB |
| Bifidobacterium longum       | VBIBifLon171405_1555       | Long-chain-fatty-acid--CoA ligase EC 6.2.1.3                                                              |
| Bifidobacterium longum       | VBIBifLon171405_0271       | Minor teichoic acid biosynthesis protein GgaB                                                             |
| Bifidobacterium longum       | VBIBifLon171405_1033       | N-acetylneuraminase synthase EC 2.5.1.56                                                                  |
| Bordetella pertussis         | VBIBorPer7866_0914         | ABC transporter ATP-binding protein YvcR                                                                  |
| Bordetella pertussis         | VBIBorPer7866_1479         | Adenylylsulfate kinase EC 2.7.1.25                                                                        |
| Bordetella pertussis         | VBIBorPer7866_0008         | Alkyl hydroperoxide reductase subunit C-like protein                                                      |
| Bordetella pertussis         | VBIBorPer7866_3100         | Long-chain-fatty-acid--CoA ligase EC 6.2.1.3                                                              |
| Bordetella pertussis         | VBIBorPer7866_4007         | Long-chain-fatty-acid--CoA ligase EC 6.2.1.3                                                              |
| Bordetella pertussis         | VBIBorPer7866_2120         | Long-chain-fatty-acid--CoA ligase EC 6.2.1.3                                                              |
| Bordetella pertussis         | VBIBorPer7866_1963         | Long-chain-fatty-acid--CoA ligase EC 6.2.1.3                                                              |
| Bordetella pertussis         | VBIBorPer7866_2356         | Long-chain-fatty-acid--CoA ligase EC 6.2.1.3                                                              |
| Bordetella pertussis         | VBIBorPer7866_3425         | Long-chain-fatty-acid--CoA ligase EC 6.2.1.3                                                              |
| Bradyrhizobium elkanii       | VBIBraElk237226_2216       | Long-chain-fatty-acid--CoA ligase EC 6.2.1.3                                                              |
| Brevundimonas diminuta       | VBIBreDim149483_0191       | Gamma-glutamyltranspeptidase EC 2.3.2.2                                                                   |
| Brevundimonas diminuta       | VBIBreDim149483_0188       | Long-chain-fatty-acid--CoA ligase EC 6.2.1.3                                                              |
| Brevundimonas diminuta       | VBIBreDim149483_2160       | Manganese superoxide dismutase EC 1.15.1.1                                                                |
| Burkholderia cepacia         | VBIBurCep187818_2765       | Isochorismate synthase EC 5.4.4.2 of siderophore biosynthesis                                             |
| Burkholderia cepacia         | VBIBurCep187818_5230       | Methionine ABC transporter ATP-binding protein                                                            |
| Burkholderia cepacia         | VBIBurCep187818_1986       | methyl-accepting chemotaxis protein                                                                       |

Table S8

|                        |                      |                                                                                                             |
|------------------------|----------------------|-------------------------------------------------------------------------------------------------------------|
| Burkholderia cepacia   | VBIBurCep187818_0351 | NADPH-dependent glyceraldehyde-3-phosphate dehydrogenase EC 1.2.1.13                                        |
| Campylobacter concisus | VBICamCon95352_1566  | 3-deoxy-D-manno-octulosonic-acid transferase EC 2.-.-.-                                                     |
| Campylobacter concisus | VBICamCon95352_0199  | 3-oxoacyl-acyl-carrier protein reductase paralogue EC 1.1.1.100                                             |
| Campylobacter concisus | VBICamCon95352_0184  | 3-oxoacyl-acyl-carrier-protein synthase 2C KASII EC 2.3.1.41                                                |
| Campylobacter concisus | VBICamCon95352_0964  | ABC transporter 2C ATP-binding permease protein                                                             |
| Campylobacter concisus | VBICamCon95352_0844  | ABC transporter 2C ATP-binding permease protein                                                             |
| Campylobacter concisus | VBICamCon95352_0999  | ABC transporter 2C ATP-binding protein                                                                      |
| Campylobacter concisus | VBICamCon95352_1519  | ABC transporter ATP-binding protein                                                                         |
| Campylobacter concisus | VBICamCon95352_1287  | ABC-type antimicrobial peptide transport system 2C ATPase component                                         |
| Campylobacter concisus | VBICamCon95352_1418  | ABC-type antimicrobial peptide transport system 2C ATPase component                                         |
| Campylobacter concisus | VBICamCon95352_0503  | ABC-type Fe3+-siderophore transport system 2C permease 2 component                                          |
| Campylobacter concisus | VBICamCon95352_1290  | ABC-type polar amino acid transport system 2C ATPase component                                              |
| Campylobacter concisus | VBICamCon95352_0865  | ABC-type polar amino acid transport system 2C ATPase component                                              |
| Campylobacter concisus | VBICamCon95352_2055  | Amino acid ABC-type transporter 2C permease component                                                       |
| Campylobacter concisus | VBICamCon95352_0955  | ATP synthase beta chain EC 3.6.3.14                                                                         |
| Campylobacter concisus | VBICamCon95352_0877  | ATP-binding protein of ABC transporter system                                                               |
| Campylobacter concisus | VBICamCon95352_0779  | ATP-dependent Clp protease 2C ATP-binding subunit ClpC Negative regulator of genetic competence clcC mecB   |
| Campylobacter concisus | VBICamCon95352_0117  | Bifunctional autolysin Atl N-acetylmuramoyl-L-alanine amidase EC 3.5.1.28 endo-beta-N-acetylglucosaminidase |
| Campylobacter concisus | VBICamCon95352_1967  | Cell division transporter 2C ATP-binding protein FtsE TC 3.A.5.1.1                                          |
| Campylobacter concisus | VBICamCon95352_1093  | Cell wall surface anchor family protein                                                                     |
| Campylobacter concisus | VBICamCon95352_1226  | Cell wall surface anchor family protein                                                                     |
| Campylobacter concisus | VBICamCon95352_0887  | Cellobiose phosphorylase EC 2.4.1.-                                                                         |
| Campylobacter concisus | VBICamCon95352_0270  | Chemotaxis regulator - transmits chemoreceptor signals to flagellar motor components CheY                   |
| Campylobacter concisus | VBICamCon95352_0593  | cytochrome P450-like enzyme                                                                                 |
| Campylobacter concisus | VBICamCon95352_1484  | dTDP-glucose 4 2C6-dehydratase EC 4.2.1.46                                                                  |
| Campylobacter concisus | VBICamCon95352_0996  | Duplicated ATPase component of energizing module of predicted pyridoxine-related ECF transporter            |
| Campylobacter concisus | VBICamCon95352_0544  | Enolase EC 4.2.1.11                                                                                         |
| Campylobacter concisus | VBICamCon95352_0750  | Enolase EC 4.2.1.11                                                                                         |
| Campylobacter concisus | VBICamCon95352_0099  | Enolase EC 4.2.1.11                                                                                         |
| Campylobacter concisus | VBICamCon95352_1463  | exopolysaccharide biosynthesis protein                                                                      |
| Campylobacter concisus | VBICamCon95352_0130  | Exopolysaccharide biosynthesis protein                                                                      |
| Campylobacter concisus | VBICamCon95352_1853  | Flagellar basal-body rod modification protein FlgD                                                          |
| Campylobacter concisus | VBICamCon95352_1500  | Flagellar basal-body rod protein FlgG                                                                       |
| Campylobacter concisus | VBICamCon95352_1848  | Flagellar hook protein FlgE                                                                                 |
| Campylobacter concisus | VBICamCon95352_1855  | Flagellar hook-length control protein FlhK                                                                  |
| Campylobacter concisus | VBICamCon95352_0269  | Flagellar motor switch protein FlhG                                                                         |
| Campylobacter concisus | VBICamCon95352_0600  | Flagellin protein FlaA                                                                                      |
| Campylobacter concisus | VBICamCon95352_1755  | Glucose-1-phosphate thymidyltransferase EC 2.7.7.24                                                         |
| Campylobacter concisus | VBICamCon95352_1022  | Glucose-6-phosphate isomerase EC 5.3.1.9                                                                    |
| Campylobacter concisus | VBICamCon95352_1509  | Glucose-6-phosphate isomerase EC 5.3.1.9                                                                    |
| Campylobacter concisus | VBICamCon95352_0475  | Glutamine ABC transporter 2C periplasmic glutamine-binding protein TC 3.A.1.3.2                             |
| Campylobacter concisus | VBICamCon95352_1413  | Glutamine synthetase type I EC 6.3.1.2                                                                      |
| Campylobacter concisus | VBICamCon95352_0862  | Glycosyltransferase EC 2.4.1.-                                                                              |
| Campylobacter concisus | VBICamCon95352_1879  | Hcp                                                                                                         |
| Campylobacter concisus | VBICamCon95352_0686  | Heat shock protein 60 family chaperone GroEL                                                                |
| Campylobacter concisus | VBICamCon95352_1174  | hypothetical protein                                                                                        |
| Campylobacter concisus | VBICamCon95352_0591  | Imidazole glycerol phosphate synthase cyclase subunit EC 4.1.3.-                                            |
| Campylobacter concisus | VBICamCon95352_1563  | Iron (III) dicitrate transport system permease protein FecD TC 3.A.1.14.1                                   |
| Campylobacter concisus | VBICamCon95352_0353  | Long-chain-fatty-acid--CoA ligase EC 6.2.1.3                                                                |
| Campylobacter concisus | VBICamCon95352_0421  | Long-chain-fatty-acid--CoA ligase EC 6.2.1.3                                                                |
| Campylobacter concisus | VBICamCon95352_0332  | Long-chain-fatty-acid--CoA ligase EC 6.2.1.3                                                                |
| Campylobacter concisus | VBICamCon95352_0342  | Long-chain-fatty-acid--CoA ligase EC 6.2.1.3                                                                |
| Campylobacter concisus | VBICamCon95352_0450  | Long-chain-fatty-acid--CoA ligase EC 6.2.1.3                                                                |
| Campylobacter concisus | VBICamCon95352_1847  | Long-chain-fatty-acid--CoA ligase EC 6.2.1.3                                                                |
| Campylobacter concisus | VBICamCon95352_0315  | Long-chain-fatty-acid--CoA ligase EC 6.2.1.3                                                                |
| Campylobacter concisus | VBICamCon95352_0436  | Long-chain-fatty-acid--CoA ligase EC 6.2.1.3                                                                |
| Campylobacter concisus | VBICamCon95352_0321  | Long-chain-fatty-acid--CoA ligase EC 6.2.1.3                                                                |
| Campylobacter concisus | VBICamCon95352_0431  | Long-chain-fatty-acid--CoA ligase EC 6.2.1.3                                                                |
| Campylobacter concisus | VBICamCon95352_0909  | Maltose maltodextrin transport ATP-binding protein MalK EC 3.6.3.19                                         |
| Campylobacter concisus | VBICamCon95352_0473  | Manganese superoxide dismutase EC 1.15.1.1                                                                  |
| Campylobacter concisus | VBICamCon95352_1316  | Methionine biosynthesis and transport regulator MtaR 2C LysR family                                         |
| Campylobacter concisus | VBICamCon95352_0605  | Minor teichoic acid biosynthesis protein GgaB                                                               |
| Campylobacter concisus | VBICamCon95352_0640  | N-acetylneuraminate synthase EC 2.5.1.56                                                                    |
| Campylobacter concisus | VBICamCon95352_1520  | NAD-dependent formate dehydrogenase alpha subunit                                                           |
| Campylobacter concisus | VBICamCon95352_0194  | Oligopeptide transport ATP-binding protein OppD TC 3.A.1.5.1                                                |
| Campylobacter concisus | VBICamCon95352_2078  | Outer membrane fibronectin-binding protein                                                                  |
| Campylobacter concisus | VBICamCon95352_1003  | Phosphate transport ATP-binding protein PstB TC 3.A.1.7.1                                                   |
| Campylobacter concisus | VBICamCon95352_1414  | Phosphoglucosamine mutase EC 5.4.2.10                                                                       |
| Campylobacter concisus | VBICamCon95352_0679  | Phosphoglucosamine mutase EC 5.4.2.10                                                                       |
| Campylobacter concisus | VBICamCon95352_1594  | pili assembly chaperone                                                                                     |
| Campylobacter concisus | VBICamCon95352_1501  | probable ATP-binding component of ABC transporter                                                           |
| Campylobacter concisus | VBICamCon95352_1508  | probable ATP-binding component of ABC transporter                                                           |
| Campylobacter concisus | VBICamCon95352_0881  | probable permease protein of ABC transporter system                                                         |
| Campylobacter concisus | VBICamCon95352_0708  | Protein export cytoplasm protein SecA ATPase RNA helicase TC 3.A.5.1.1                                      |
| Campylobacter concisus | VBICamCon95352_1407  | Protein export cytoplasm protein SecA ATPase RNA helicase TC 3.A.5.1.1                                      |
| Campylobacter concisus | VBICamCon95352_1512  | putative ABC transport proteins 2C ATP-binding component                                                    |
| Campylobacter concisus | VBICamCon95352_0500  | putative cytochrome P450 hydroxylase                                                                        |
| Campylobacter concisus | VBICamCon95352_0852  | Response regulator of two-component system                                                                  |
| Campylobacter concisus | VBICamCon95352_0628  | Ribose ABC transport system 2C ATP-binding protein RbsA TC 3.A.1.2.1                                        |

Table S8

|                        |                     |                                                                                       |
|------------------------|---------------------|---------------------------------------------------------------------------------------|
| Campylobacter concisus | VBICamCon95352_1215 | RNA binding methyltransferase FtsJ like                                               |
| Campylobacter concisus | VBICamCon95352_0991 | RNA polymerase sigma factor RpoD                                                      |
| Campylobacter concisus | VBICamCon95352_1184 | RNA polymerase sigma factor RpoD                                                      |
| Campylobacter concisus | VBICamCon95352_0711 | RNA polymerase sigma factor RpoD                                                      |
| Campylobacter concisus | VBICamCon95352_1511 | RNA polymerase sigma factor RpoD                                                      |
| Campylobacter concisus | VBICamCon95352_2083 | Selenocysteine-specific translation elongation factor                                 |
| Campylobacter concisus | VBICamCon95352_1251 | Serine threonine phosphatase PPP EC 3.1.3.16                                          |
| Campylobacter concisus | VBICamCon95352_1250 | Serine threonine protein kinase PrkC 2C regulator of stationary phase                 |
| Campylobacter concisus | VBICamCon95352_1498 | short-chain dehydrogenase                                                             |
| Campylobacter concisus | VBICamCon95352_1221 | Sialidase EC 3.2.1.18                                                                 |
| Campylobacter concisus | VBICamCon95352_1734 | Sigma-54 dependent transcriptional regulator                                          |
| Campylobacter concisus | VBICamCon95352_1312 | Signal transduction histidine kinase                                                  |
| Campylobacter concisus | VBICamCon95352_1252 | Sortase A 2C LPXTG specific                                                           |
| Campylobacter concisus | VBICamCon95352_0917 | Sortase A 2C LPXTG specific                                                           |
| Campylobacter concisus | VBICamCon95352_1417 | Taurine transport ATP-binding protein TauB                                            |
| Campylobacter concisus | VBICamCon95352_1223 | Taurine transport ATP-binding protein TauB                                            |
| Campylobacter concisus | VBICamCon95352_1079 | Taurine transport ATP-binding protein TauB                                            |
| Campylobacter concisus | VBICamCon95352_0898 | Taurine transport ATP-binding protein TauB                                            |
| Campylobacter concisus | VBICamCon95352_0614 | Teichoic acid export ATP-binding protein TagH EC 3.6.3.40                             |
| Campylobacter concisus | VBICamCon95352_1415 | Teichoic acid export ATP-binding protein TagH EC 3.6.3.40                             |
| Campylobacter concisus | VBICamCon95352_1548 | TonB-dependent receptor 3B Outer membrane receptor for ferrienterochelin and colicins |
| Campylobacter concisus | VBICamCon95352_1305 | Translation elongation factor Tu                                                      |
| Campylobacter concisus | VBICamCon95352_0851 | Translation elongation factor Tu                                                      |
| Campylobacter concisus | VBICamCon95352_1496 | Translation elongation factor Tu                                                      |
| Campylobacter concisus | VBICamCon95352_1289 | two component transcriptional regulator 2C LuxR family                                |
| Campylobacter concisus | VBICamCon95352_0876 | two-component response regulator                                                      |
| Campylobacter concisus | VBICamCon95352_0131 | Two-component sensor kinase SA14-24                                                   |
| Campylobacter concisus | VBICamCon95352_0129 | Two-component sensor kinase YvcQ                                                      |
| Campylobacter concisus | VBICamCon95352_0545 | Two-component sensor kinase YvcQ                                                      |
| Campylobacter concisus | VBICamCon95352_1478 | Tyrosine-protein kinase Wzc EC 2.7.10.2                                               |
| Campylobacter concisus | VBICamCon95352_1492 | UDP-galactopyranose mutase EC 5.4.99.9                                                |
| Campylobacter concisus | VBICamCon95352_1288 | UDP-galactopyranose mutase EC 5.4.99.9                                                |
| Campylobacter concisus | VBICamCon95352_1494 | UDP-glucose 4-epimerase EC 5.1.3.2                                                    |
| Campylobacter concisus | VBICamCon95352_0604 | UDP-glucose dehydrogenase EC 1.1.1.22                                                 |
| Campylobacter concisus | VBICamCon95352_1779 | UDP-N-acetylglucosamine 2-epimerase EC 5.1.3.14                                       |
| Campylobacter concisus | VBICamCon95352_1857 | Uncharacterized protein ImpJ VasE                                                     |
| Campylobacter concisus | VBICamCon95352_1119 | Undecaprenyl-phosphate galactosephosphotransferase EC 2.7.8.6                         |
| Campylobacter concisus | VBICamCon95352_1516 | Urease alpha subunit EC 3.5.1.5                                                       |
| Campylobacter concisus | VBICamCon95352_1916 | VgrG protein                                                                          |
| Campylobacter concisus | VBICamCon95352_1808 | Zinc ABC transporter 2C ATP-binding protein ZnuC                                      |
| Campylobacter curvus   | VBICamCur47627_1749 | 2-keto-3-deoxy-D-arabino-heptulosonate-7-phosphate synthase II EC 2.5.1.54            |
| Campylobacter curvus   | VBICamCur47627_0017 | 2-Keto-3-deoxy-D-manno-octulosonate-8-phosphate synthase EC 2.5.1.55                  |
| Campylobacter curvus   | VBICamCur47627_0418 | Alkyl hydroperoxide reductase subunit C-like protein                                  |
| Campylobacter curvus   | VBICamCur47627_1365 | Amino-acid ABC transporter ATP-binding protein                                        |
| Campylobacter curvus   | VBICamCur47627_1093 | Anthranilate synthase 2C aminase component EC 4.1.3.27                                |
| Campylobacter curvus   | VBICamCur47627_0444 | ATP synthase alpha chain EC 3.6.3.14                                                  |
| Campylobacter curvus   | VBICamCur47627_0460 | ATP synthase beta chain EC 3.6.3.14                                                   |
| Campylobacter curvus   | VBICamCur47627_0898 | Chemotaxis protein CheV EC 2.7.3.-                                                    |
| Campylobacter curvus   | VBICamCur47627_1757 | ClpB protein                                                                          |
| Campylobacter curvus   | VBICamCur47627_1074 | Diaminopimelate decarboxylase EC 4.1.1.20                                             |
| Campylobacter curvus   | VBICamCur47627_1079 | Flagellar assembly protein FliH                                                       |
| Campylobacter curvus   | VBICamCur47627_0424 | Flagellar biosynthesis protein FliB                                                   |
| Campylobacter curvus   | VBICamCur47627_1563 | Flagellar biosynthesis protein FliS                                                   |
| Campylobacter curvus   | VBICamCur47627_1789 | Flagellar hook-associated protein FlgL                                                |
| Campylobacter curvus   | VBICamCur47627_1626 | Flagellar hook-associated protein FliD                                                |
| Campylobacter curvus   | VBICamCur47627_1357 | Flagellar motor rotation protein MotA                                                 |
| Campylobacter curvus   | VBICamCur47627_1078 | Flagellar motor switch protein FliG                                                   |
| Campylobacter curvus   | VBICamCur47627_1719 | Flagellar P-ring protein FlgI                                                         |
| Campylobacter curvus   | VBICamCur47627_1122 | Glutamate-1-semialdehyde aminotransferase EC 5.4.3.8                                  |
| Campylobacter curvus   | VBICamCur47627_1543 | Glutamyl-tRNA reductase EC 1.2.1.70                                                   |
| Campylobacter curvus   | VBICamCur47627_1236 | HlyD family secretion protein                                                         |
| Campylobacter curvus   | VBICamCur47627_1403 | HtrA protease chaperone protein Serine protease Protease DO EC 3.4.21.-               |
| Campylobacter curvus   | VBICamCur47627_0817 | Iron (III) ABC transporter 2C ATP-binding protein                                     |
| Campylobacter curvus   | VBICamCur47627_1301 | Major outer membrane protein                                                          |
| Campylobacter curvus   | VBICamCur47627_1790 | MSHA biogenesis protein MshL                                                          |
| Campylobacter curvus   | VBICamCur47627_1224 | Ornithine carbamoyltransferase EC 2.1.3.3                                             |
| Campylobacter curvus   | VBICamCur47627_0514 | Outer membrane protein assembly factor YaeT precursor                                 |
| Campylobacter curvus   | VBICamCur47627_0140 | Phosphate regulon transcriptional regulatory protein PhoB SphR                        |
| Campylobacter curvus   | VBICamCur47627_1544 | Porphobilinogen deaminase EC 2.5.1.61                                                 |
| Campylobacter curvus   | VBICamCur47627_0911 | Positive regulator of CheA protein activity CheW                                      |
| Campylobacter curvus   | VBICamCur47627_1240 | Possible bacterioferritin                                                             |
| Campylobacter curvus   | VBICamCur47627_1399 | Protein export cytoplasm protein SecA ATPase RNA helicase TC 3.A.5.1.1                |
| Campylobacter curvus   | VBICamCur47627_0010 | Putative ABC transport system ATP-binding protein                                     |
| Campylobacter curvus   | VBICamCur47627_1514 | Putative two-component regulator                                                      |
| Campylobacter curvus   | VBICamCur47627_1133 | Signal-transduction regulatory protein FlgR                                           |
| Campylobacter curvus   | VBICamCur47627_1731 | Superoxide dismutase Cu-Zn precursor EC 1.15.1.1                                      |
| Campylobacter curvus   | VBICamCur47627_1778 | Two-component system response regulator DccR                                          |
| Campylobacter curvus   | VBICamCur47627_1755 | UDP-3-O-3-hydroxymyristoyl glucosamine N-acyltransferase EC 2.3.1.-                   |
| Campylobacter curvus   | VBICamCur47627_0799 | UDP-3-O-3-hydroxymyristoyl N-acetylglucosamine deacetylase EC 3.5.1.-                 |

Table S8

|                        |                     |                                                                                                                            |
|------------------------|---------------------|----------------------------------------------------------------------------------------------------------------------------|
| Campylobacter curvus   | VBICamCur47627_0889 | Vitamin B12 ABC transporter 2C permease component BtuC                                                                     |
| Campylobacter gracilis | VBICamGra90913_0674 | 3-deoxy-D-manno-octulosonic-acid transferase EC 2.-.-                                                                      |
| Campylobacter gracilis | VBICamGra90913_1659 | 3-deoxy-manno-octulosonate cytidyltransferase EC 2.7.7.38                                                                  |
| Campylobacter gracilis | VBICamGra90913_2204 | 4-amino-6-deoxy-N-Acetyl-D-hexosaminyL-Lipid carrier acetyltransferase                                                     |
| Campylobacter gracilis | VBICamGra90913_0863 | ADP-heptose synthase EC 2.7.-.- D-glycero-beta-D-manno-heptose 7-phosphate kinase                                          |
| Campylobacter gracilis | VBICamGra90913_2320 | Alpha-1 2C3-N-acetylgalactosamine transferase PglA EC 2.4.1.-                                                              |
| Campylobacter gracilis | VBICamGra90913_1969 | Chemotaxis regulator - transmits chemoreceptor signals to flagellar motor components CheY                                  |
| Campylobacter gracilis | VBICamGra90913_1109 | D-glycero-D-manno-heptose 1 2C7-bisphosphate phosphatase EC 3.1.1.-                                                        |
| Campylobacter gracilis | VBICamGra90913_1323 | Flagellar basal-body rod protein FlgB                                                                                      |
| Campylobacter gracilis | VBICamGra90913_1338 | Flagellar basal-body rod protein FlgC                                                                                      |
| Campylobacter gracilis | VBICamGra90913_1618 | Flagellar basal-body rod protein FlgF                                                                                      |
| Campylobacter gracilis | VBICamGra90913_1552 | Flagellar basal-body rod protein FlgG                                                                                      |
| Campylobacter gracilis | VBICamGra90913_0408 | Flagellar biosynthesis protein Flil                                                                                        |
| Campylobacter gracilis | VBICamGra90913_1535 | Flagellar hook-basal body complex protein FlIE                                                                             |
| Campylobacter gracilis | VBICamGra90913_0386 | Flagellar L-ring protein FlgH                                                                                              |
| Campylobacter gracilis | VBICamGra90913_0739 | Glutamine synthetase type I EC 6.3.1.2                                                                                     |
| Campylobacter gracilis | VBICamGra90913_2079 | Imidazole glycerol phosphate synthase amidotransferase subunit EC 2.4.2.-                                                  |
| Campylobacter gracilis | VBICamGra90913_0307 | Lipopolysaccharide ABC transporter 2C ATP-binding protein LptB                                                             |
| Campylobacter gracilis | VBICamGra90913_0331 | Macrolide export ATP-binding permease protein MacB EC 3.6.3.-                                                              |
| Campylobacter gracilis | VBICamGra90913_1655 | Major outer membrane protein                                                                                               |
| Campylobacter gracilis | VBICamGra90913_2533 | Oligosaccharyltransferase PglB EC 2.4.1.119                                                                                |
| Campylobacter gracilis | VBICamGra90913_2641 | Oligosaccharyltransferase PglB EC 2.4.1.119                                                                                |
| Campylobacter gracilis | VBICamGra90913_0744 | Pantoate--beta-alanine ligase EC 6.3.2.1                                                                                   |
| Campylobacter gracilis | VBICamGra90913_0388 | Phospholipid-lipopolysaccharide ABC transporter                                                                            |
| Campylobacter gracilis | VBICamGra90913_1619 | RNA polymerase sigma factor RpoD                                                                                           |
| Campylobacter gracilis | VBICamGra90913_1274 | Serine acetyltransferase EC 2.3.1.30                                                                                       |
| Campylobacter gracilis | VBICamGra90913_1968 | TonB-dependent receptor                                                                                                    |
| Campylobacter gracilis | VBICamGra90913_0294 | TonB-dependent receptor 3B Outer membrane receptor for ferrienterochelin and colicins                                      |
| Campylobacter gracilis | VBICamGra90913_0138 | Type II secretion system protein                                                                                           |
| Campylobacter gracilis | VBICamGra90913_2700 | UDP-2-acetamido-2-deoxy-D-glucose dehydrogenase NAD+                                                                       |
| Campylobacter gracilis | VBICamGra90913_2195 | UDP-N-acetylglucosamine 4 2C6-dehydratase EC 4.2.1.-                                                                       |
| Campylobacter gracilis | VBICamGra90913_1696 | Uroporphyrinogen III decarboxylase EC 4.1.1.37                                                                             |
| Campylobacter gracilis | VBICamGra90913_1903 | UTP--glucose-1-phosphate uridylyltransferase EC 2.7.7.9                                                                    |
| Campylobacter rectus   | VBICamRec32822_0707 | 2-Keto-3-deoxy-D-manno-octulosonate-8-phosphate synthase EC 2.5.1.55                                                       |
| Campylobacter rectus   | VBICamRec32822_2605 | 3-oxoacyl-acyl-carrier protein reductase EC 1.1.1.100                                                                      |
| Campylobacter rectus   | VBICamRec32822_2277 | 3-oxoacyl-acyl-carrier-protein synthase 2C KASII EC 2.3.1.41                                                               |
| Campylobacter rectus   | VBICamRec32822_2658 | 3-oxoacyl-acyl-carrier-protein synthase 2C KASII EC 2.3.1.41                                                               |
| Campylobacter rectus   | VBICamRec32822_0295 | 3R-hydroxymyristoyl-acyl carrier protein dehydratase EC 4.2.1.-                                                            |
| Campylobacter rectus   | VBICamRec32822_2703 | ABC transporter 2C ATP-binding protein                                                                                     |
| Campylobacter rectus   | VBICamRec32822_2604 | ABC transporter 2C transmembrane regionABC transporterPeptidase C39 2C bacteriocin processing                              |
| Campylobacter rectus   | VBICamRec32822_2574 | Acetyl esterase EC 3.1.1.-                                                                                                 |
| Campylobacter rectus   | VBICamRec32822_2573 | Acyl-acyl-carrier-protein--UDP-N- acetylglucosamine O-acyltransferase EC 2.3.1.129                                         |
| Campylobacter rectus   | VBICamRec32822_1236 | ADP-heptose synthase EC 2.7.-.- D-glycero-beta-D-manno-heptose 7-phosphate kinase                                          |
| Campylobacter rectus   | VBICamRec32822_0411 | Alkanesulfonates ABC transporter ABC transporter ATP-binding protein Sulfonate ABC transporter 2C ATP-binding subunit SsuB |
| Campylobacter rectus   | VBICamRec32822_1985 | Alkyl hydroperoxide reductase subunit C-like protein                                                                       |
| Campylobacter rectus   | VBICamRec32822_1520 | Alkyl hydroperoxide reductase subunit C-like protein                                                                       |
| Campylobacter rectus   | VBICamRec32822_2312 | Arabinose 5-phosphate isomerase EC 5.3.1.13                                                                                |
| Campylobacter rectus   | VBICamRec32822_0417 | Arabinose 5-phosphate isomerase EC 5.3.1.13                                                                                |
| Campylobacter rectus   | VBICamRec32822_1968 | ATP synthase alpha chain EC 3.6.3.14                                                                                       |
| Campylobacter rectus   | VBICamRec32822_2351 | ATP synthase alpha chain EC 3.6.3.14                                                                                       |
| Campylobacter rectus   | VBICamRec32822_1967 | ATP synthase beta chain EC 3.6.3.14                                                                                        |
| Campylobacter rectus   | VBICamRec32822_2004 | ATP-dependent Clp protease ATP-binding subunit ClpA                                                                        |
| Campylobacter rectus   | VBICamRec32822_0397 | Bacillosamine Legionaminic acid biosynthesis aminotransferase PglE                                                         |
| Campylobacter rectus   | VBICamRec32822_1860 | BarA sensory histidine kinase 3D VarS 3D GacS                                                                              |
| Campylobacter rectus   | VBICamRec32822_0275 | Campylobacter invasion antigen B CiaB                                                                                      |
| Campylobacter rectus   | VBICamRec32822_1992 | Cell division trigger factor EC 5.2.1.8                                                                                    |
| Campylobacter rectus   | VBICamRec32822_2563 | Chemotaxis protein CheV EC 2.7.3.-                                                                                         |
| Campylobacter rectus   | VBICamRec32822_2602 | Coproporphyrinogen III oxidase 2C oxygen-independent EC 1.3.99.22                                                          |
| Campylobacter rectus   | VBICamRec32822_2452 | Diaminopimelate decarboxylase EC 4.1.1.20                                                                                  |
| Campylobacter rectus   | VBICamRec32822_0597 | dTDP-glucose 4 2C6-dehydratase EC 4.2.1.46                                                                                 |
| Campylobacter rectus   | VBICamRec32822_0147 | dTDP-glucose 4 2C6-dehydratase EC 4.2.1.46                                                                                 |
| Campylobacter rectus   | VBICamRec32822_0352 | Enolase EC 4.2.1.11                                                                                                        |
| Campylobacter rectus   | VBICamRec32822_1989 | Enolase EC 4.2.1.11                                                                                                        |
| Campylobacter rectus   | VBICamRec32822_2297 | FIG00471093 hypothetical protein                                                                                           |
| Campylobacter rectus   | VBICamRec32822_2300 | FIG00471093 hypothetical protein                                                                                           |
| Campylobacter rectus   | VBICamRec32822_2299 | FIG00471093 hypothetical protein                                                                                           |
| Campylobacter rectus   | VBICamRec32822_2304 | FIG00471093 hypothetical protein                                                                                           |
| Campylobacter rectus   | VBICamRec32822_0243 | FIG138576 3-oxoacyl-ACP synthase EC 2.3.1.41                                                                               |
| Campylobacter rectus   | VBICamRec32822_2386 | Flagellar assembly protein FlilH                                                                                           |
| Campylobacter rectus   | VBICamRec32822_2728 | Flagellar basal-body rod modification protein FlgD                                                                         |
| Campylobacter rectus   | VBICamRec32822_1157 | Flagellar basal-body rod protein FlgB                                                                                      |
| Campylobacter rectus   | VBICamRec32822_0813 | Flagellar basal-body rod protein FlgG                                                                                      |
| Campylobacter rectus   | VBICamRec32822_2362 | Flagellar biosynthesis protein FlhB                                                                                        |
| Campylobacter rectus   | VBICamRec32822_0814 | Flagellar biosynthesis protein FlhP                                                                                        |
| Campylobacter rectus   | VBICamRec32822_2672 | Flagellar biosynthesis protein FlhR                                                                                        |
| Campylobacter rectus   | VBICamRec32822_1065 | Flagellar biosynthesis protein FlhS                                                                                        |
| Campylobacter rectus   | VBICamRec32822_0433 | Flagellar hook subunit protein                                                                                             |
| Campylobacter rectus   | VBICamRec32822_0569 | Flagellar hook subunit protein                                                                                             |
| Campylobacter rectus   | VBICamRec32822_2347 | Flagellar hook subunit protein                                                                                             |

Table S8

|                      |                     |                                                                                                    |
|----------------------|---------------------|----------------------------------------------------------------------------------------------------|
| Campylobacter rectus | VBICamRec32822_0574 | Flagellar hook subunit protein                                                                     |
| Campylobacter rectus | VBICamRec32822_0539 | Flagellar hook subunit protein                                                                     |
| Campylobacter rectus | VBICamRec32822_0879 | Flagellar hook-associated protein FlgL                                                             |
| Campylobacter rectus | VBICamRec32822_2730 | Flagellar hook-length control protein FliK                                                         |
| Campylobacter rectus | VBICamRec32822_0567 | Flagellar hook-length control protein FliK                                                         |
| Campylobacter rectus | VBICamRec32822_2408 | Flagellar M-ring protein FliF                                                                      |
| Campylobacter rectus | VBICamRec32822_2407 | Flagellar motor switch protein FliG                                                                |
| Campylobacter rectus | VBICamRec32822_1421 | Flagellar motor switch protein FliM                                                                |
| Campylobacter rectus | VBICamRec32822_1376 | Flagellar motor switch protein FliN                                                                |
| Campylobacter rectus | VBICamRec32822_2381 | Flagellar motor switch protein FliN                                                                |
| Campylobacter rectus | VBICamRec32822_1686 | Flagellin                                                                                          |
| Campylobacter rectus | VBICamRec32822_0357 | Flagellin                                                                                          |
| Campylobacter rectus | VBICamRec32822_0595 | Flagellum-specific ATP synthase Flil                                                               |
| Campylobacter rectus | VBICamRec32822_2033 | FOG TPR repeat                                                                                     |
| Campylobacter rectus | VBICamRec32822_2128 | FOG TPR repeat                                                                                     |
| Campylobacter rectus | VBICamRec32822_2129 | FOG TPR repeat                                                                                     |
| Campylobacter rectus | VBICamRec32822_2007 | FOG TPR repeat                                                                                     |
| Campylobacter rectus | VBICamRec32822_2009 | FOG TPR repeat                                                                                     |
| Campylobacter rectus | VBICamRec32822_2097 | FOG TPR repeat                                                                                     |
| Campylobacter rectus | VBICamRec32822_2008 | FOG TPR repeat                                                                                     |
| Campylobacter rectus | VBICamRec32822_2256 | Glutamine synthetase type I EC 6.3.1.2                                                             |
| Campylobacter rectus | VBICamRec32822_2962 | Haemin uptake system ATP-binding protein                                                           |
| Campylobacter rectus | VBICamRec32822_1895 | Haemin uptake system permease protein                                                              |
| Campylobacter rectus | VBICamRec32822_2918 | Haemin uptake system permease protein                                                              |
| Campylobacter rectus | VBICamRec32822_1141 | Heat shock protein 60 family chaperone GroEL                                                       |
| Campylobacter rectus | VBICamRec32822_2278 | Hemolysins and related proteins containing CBS domains                                             |
| Campylobacter rectus | VBICamRec32822_0406 | Hemolysins and related proteins containing CBS domains                                             |
| Campylobacter rectus | VBICamRec32822_1970 | HtrA protease chaperone protein Serine protease Protease DO EC 3.4.21.-                            |
| Campylobacter rectus | VBICamRec32822_2761 | hypothetical protein                                                                               |
| Campylobacter rectus | VBICamRec32822_2131 | hypothetical protein                                                                               |
| Campylobacter rectus | VBICamRec32822_1995 | hypothetical protein                                                                               |
| Campylobacter rectus | VBICamRec32822_2001 | hypothetical protein                                                                               |
| Campylobacter rectus | VBICamRec32822_3016 | Hypothetical radical SAM family enzyme 2C NOT coproporphyrinogen III oxidase 2C oxygen-independent |
| Campylobacter rectus | VBICamRec32822_0688 | Imidazole glycerol phosphate synthase amidotransferase subunit EC 2.4.2.-                          |
| Campylobacter rectus | VBICamRec32822_1754 | Iron (III) ABC transporter 2C ATP-binding protein                                                  |
| Campylobacter rectus | VBICamRec32822_1788 | Iron (III) dicitrate transport system permease protein FecD TC 3.A.1.14.1                          |
| Campylobacter rectus | VBICamRec32822_0395 | Legionaminic acid biosynthesis protein PtmA                                                        |
| Campylobacter rectus | VBICamRec32822_0396 | Legionaminic acid synthase EC 2.5.1.56                                                             |
| Campylobacter rectus | VBICamRec32822_0165 | Lipid A biosynthesis lauroyl acyltransferase EC 2.3.1.-                                            |
| Campylobacter rectus | VBICamRec32822_2564 | Lipid-A-disaccharide synthase EC 2.4.1.182                                                         |
| Campylobacter rectus | VBICamRec32822_0884 | Lipopolysaccharide ABC transporter 2C ATP-binding protein LptB                                     |
| Campylobacter rectus | VBICamRec32822_2845 | Major outer membrane protein                                                                       |
| Campylobacter rectus | VBICamRec32822_2842 | Major outer membrane protein                                                                       |
| Campylobacter rectus | VBICamRec32822_0781 | Major outer membrane protein                                                                       |
| Campylobacter rectus | VBICamRec32822_1240 | Major outer membrane protein                                                                       |
| Campylobacter rectus | VBICamRec32822_0401 | Motility accessory factor                                                                          |
| Campylobacter rectus | VBICamRec32822_1650 | Motility accessory factor                                                                          |
| Campylobacter rectus | VBICamRec32822_1973 | MSHA biogenesis protein MshL                                                                       |
| Campylobacter rectus | VBICamRec32822_2709 | Nucleoside 5-triphosphatase RdgB dHATP 2C dITP 2C XTP-specific EC 3.6.1.15                         |
| Campylobacter rectus | VBICamRec32822_0639 | Oligosaccharyltransferase PglB EC 2.4.1.119                                                        |
| Campylobacter rectus | VBICamRec32822_1982 | Oligosaccharyltransferase PglB EC 2.4.1.119                                                        |
| Campylobacter rectus | VBICamRec32822_2582 | Ornithine carbamoyltransferase EC 2.1.3.3                                                          |
| Campylobacter rectus | VBICamRec32822_1969 | Outer membrane fibronectin-binding protein                                                         |
| Campylobacter rectus | VBICamRec32822_1993 | Outer membrane receptor proteins 2C mostly Fe transport                                            |
| Campylobacter rectus | VBICamRec32822_1751 | Outer membrane receptor proteins 2C mostly Fe transport                                            |
| Campylobacter rectus | VBICamRec32822_1196 | Pantoate--beta-alanine ligase EC 6.3.2.1                                                           |
| Campylobacter rectus | VBICamRec32822_2384 | Phosphate regulon transcriptional regulatory protein PhoB SphR                                     |
| Campylobacter rectus | VBICamRec32822_2841 | Phosphoglucosamine mutase EC 5.4.2.10 Phosphomannomutase EC 5.4.2.8                                |
| Campylobacter rectus | VBICamRec32822_2238 | Porphobilinogen synthase EC 4.2.1.24                                                               |
| Campylobacter rectus | VBICamRec32822_2575 | Porphobilinogen synthase EC 4.2.1.24                                                               |
| Campylobacter rectus | VBICamRec32822_2888 | Possible bacterioferritin                                                                          |
| Campylobacter rectus | VBICamRec32822_1244 | Possible bacterioferritin                                                                          |
| Campylobacter rectus | VBICamRec32822_1566 | Putative ABC transport system ATP-binding protein                                                  |
| Campylobacter rectus | VBICamRec32822_0215 | Putative ABC transporter ATP binding protein                                                       |
| Campylobacter rectus | VBICamRec32822_1800 | RNA polymerase sigma factor RpoD                                                                   |
| Campylobacter rectus | VBICamRec32822_0565 | S-ribosylhomocysteine lyase EC 4.4.1.21 Autoinducer-2 production protein LuxS                      |
| Campylobacter rectus | VBICamRec32822_1576 | Selenocysteine-specific translation elongation factor                                              |
| Campylobacter rectus | VBICamRec32822_2562 | Signal transduction histidine kinase CheA EC 2.7.3.-                                               |
| Campylobacter rectus | VBICamRec32822_1026 | Superoxide dismutase Cu-Zn precursor EC 1.15.1.1                                                   |
| Campylobacter rectus | VBICamRec32822_0412 | Superoxide dismutase Fe EC 1.15.1.1                                                                |
| Campylobacter rectus | VBICamRec32822_2284 | Superoxide dismutase Fe EC 1.15.1.1                                                                |
| Campylobacter rectus | VBICamRec32822_2288 | TonB-dependent hemin 2C ferrichrome receptor                                                       |
| Campylobacter rectus | VBICamRec32822_1975 | TonB-dependent receptor                                                                            |
| Campylobacter rectus | VBICamRec32822_1021 | TonB-dependent receptor 3B Enterobactin receptor IrgA                                              |
| Campylobacter rectus | VBICamRec32822_2252 | TonB-dependent receptor 3B Outer membrane receptor for ferrienterochelin and colicins              |
| Campylobacter rectus | VBICamRec32822_0906 | TonB-dependent receptor 3B Outer membrane receptor for ferrienterochelin and colicins              |
| Campylobacter rectus | VBICamRec32822_2213 | Translation elongation factor Tu                                                                   |
| Campylobacter rectus | VBICamRec32822_1965 | Twitching motility protein PilT                                                                    |
| Campylobacter rectus | VBICamRec32822_2561 | Twitching motility protein PilT                                                                    |

Table S8

|                      |                     |                                                                                                         |
|----------------------|---------------------|---------------------------------------------------------------------------------------------------------|
| Campylobacter rectus | VBICamRec32822_0744 | Twitching motility protein PilT                                                                         |
| Campylobacter rectus | VBICamRec32822_1984 | Twitching motility protein PilT                                                                         |
| Campylobacter rectus | VBICamRec32822_0815 | Two-component system response regulator                                                                 |
| Campylobacter rectus | VBICamRec32822_1974 | Type II secretion system protein                                                                        |
| Campylobacter rectus | VBICamRec32822_1024 | Type II secretion system protein                                                                        |
| Campylobacter rectus | VBICamRec32822_1435 | UDP-3-O-3-hydroxymyristoyl N-acetylglucosamine deacetylase EC 3.5.1.-                                   |
| Campylobacter rectus | VBICamRec32822_2348 | UDP-3-O-3-hydroxymyristoyl N-acetylglucosamine deacetylase EC 3.5.1.-                                   |
| Campylobacter rectus | VBICamRec32822_2212 | UDP-3-O-3-hydroxymyristoyl N-acetylglucosamine deacetylase EC 3.5.1.-                                   |
| Campylobacter rectus | VBICamRec32822_1069 | UDP-4-amino-4-deoxy-L-arabinose--oxoglutarate aminotransferase EC 2.6.1.-                               |
| Campylobacter rectus | VBICamRec32822_1623 | UDP-GlcNAc-specific C4 2C6 dehydratase C5 epimerase PseB 2C first step of pseudaminic acid biosynthesis |
| Campylobacter rectus | VBICamRec32822_0033 | UDP-glucose 4-epimerase EC 5.1.3.2                                                                      |
| Campylobacter rectus | VBICamRec32822_0008 | UDP-glucose dehydrogenase EC 1.1.1.22                                                                   |
| Campylobacter rectus | VBICamRec32822_2002 | UDP-glucose dehydrogenase EC 1.1.1.22                                                                   |
| Campylobacter rectus | VBICamRec32822_2174 | UDP-glucose dehydrogenase EC 1.1.1.22                                                                   |
| Campylobacter rectus | VBICamRec32822_2266 | UDP-N-acetylglucosamine 4 2C6-dehydratase EC 4.2.1.-                                                    |
| Campylobacter rectus | VBICamRec32822_0177 | Undecaprenyl-phosphate galactosephosphotransferase EC 2.7.8.6                                           |
| Campylobacter rectus | VBICamRec32822_1066 | Undecaprenyl-phosphate galactosephosphotransferase EC 2.7.8.6                                           |
| Campylobacter rectus | VBICamRec32822_1374 | Uroporphyrinogen III decarboxylase EC 4.1.1.37                                                          |
| Campylobacter rectus | VBICamRec32822_1976 | Vitamin B12 ABC transporter 2C permease component BtuC                                                  |
| Campylobacter rectus | VBICamRec32822_2731 | Zinc ABC transporter 2C ATP-binding protein ZnuC                                                        |
| Campylobacter showae | VBICamSho45867_0149 | 2-keto-3-deoxy-D-arabino-heptulosonate-7- phosphate synthase II EC 2.5.1.54                             |
| Campylobacter showae | VBICamSho45867_1696 | 2-Keto-3-deoxy-D-manno-octulosonate-8-phosphate synthase EC 2.5.1.55                                    |
| Campylobacter showae | VBICamSho45867_0031 | 3-deoxy-D-manno-octulosonic-acid transferase EC 2.-.-                                                   |
| Campylobacter showae | VBICamSho45867_1877 | 3-deoxy-D-manno-octulosonic-acid transferase EC 2.-.-                                                   |
| Campylobacter showae | VBICamSho45867_0989 | 3-deoxy-manno-octulosonate cytidyltransferase EC 2.7.7.38                                               |
| Campylobacter showae | VBICamSho45867_1938 | 3-deoxy-manno-octulosonate cytidyltransferase EC 2.7.7.38                                               |
| Campylobacter showae | VBICamSho45867_2038 | 3-oxoacyl-ACP reductase EC 1.1.1.100                                                                    |
| Campylobacter showae | VBICamSho45867_1480 | 3-oxoacyl-ACP reductase EC 1.1.1.100                                                                    |
| Campylobacter showae | VBICamSho45867_1475 | 3-oxoacyl-ACP synthase EC 2.3.1.41 FabV like                                                            |
| Campylobacter showae | VBICamSho45867_2041 | 3-oxoacyl-ACP synthase EC 2.3.1.41 FabV like                                                            |
| Campylobacter showae | VBICamSho45867_2050 | 3R-hydroxymyristoyl-acyl carrier protein dehydratase EC 4.2.1.-                                         |
| Campylobacter showae | VBICamSho45867_0544 | 4-keto-6-deoxy-N-Acetyl-D-hexosaminyL-Lipid carrier aminotransferase                                    |
| Campylobacter showae | VBICamSho45867_1169 | ABC transporter                                                                                         |
| Campylobacter showae | VBICamSho45867_2052 | Acyl-acyl-carrier-protein--UDP-N- acetylglucosamine O-acyltransferase EC 2.3.1.129                      |
| Campylobacter showae | VBICamSho45867_1392 | ADP-heptose synthase EC 2.7.-.- D-glycero-beta-D-manno-heptose 7-phosphate kinase                       |
| Campylobacter showae | VBICamSho45867_0725 | ADP-heptose--lipooligosaccharide heptosyltransferase II EC 2.4.1.-                                      |
| Campylobacter showae | VBICamSho45867_1388 | ADP-L-glycero-D-manno-heptose-6-epimerase EC 5.1.3.20                                                   |
| Campylobacter showae | VBICamSho45867_1605 | Alkaline phosphatase EC 3.1.3.1                                                                         |
| Campylobacter showae | VBICamSho45867_1523 | Alkaline phosphatase EC 3.1.3.1                                                                         |
| Campylobacter showae | VBICamSho45867_1487 | Alkaline phosphatase EC 3.1.3.1                                                                         |
| Campylobacter showae | VBICamSho45867_1492 | Alkaline phosphatase EC 3.1.3.1                                                                         |
| Campylobacter showae | VBICamSho45867_2069 | Alkyl hydroperoxide reductase subunit C-like protein                                                    |
| Campylobacter showae | VBICamSho45867_0547 | Alpha-1 2C3-N-acetylgalactosamine transferase PglA EC 2.4.1.-                                           |
| Campylobacter showae | VBICamSho45867_0579 | Alpha-1 2C4-N-acetylgalactosamine transferase PglJ EC 2.4.1.-                                           |
| Campylobacter showae | VBICamSho45867_2037 | Amino-acid ABC transporter ATP-binding protein                                                          |
| Campylobacter showae | VBICamSho45867_2098 | Anthranilate synthase 2C aminase component EC 4.1.3.27                                                  |
| Campylobacter showae | VBICamSho45867_2046 | Aspartate 1-decarboxylase EC 4.1.1.11                                                                   |
| Campylobacter showae | VBICamSho45867_2137 | ATP synthase beta chain EC 3.6.3.14                                                                     |
| Campylobacter showae | VBICamSho45867_0832 | ATP-dependent Clp protease ATP-binding subunit ClpA                                                     |
| Campylobacter showae | VBICamSho45867_2032 | ATP-dependent Clp protease ATP-binding subunit ClpA                                                     |
| Campylobacter showae | VBICamSho45867_2030 | ATP-dependent Clp protease ATP-binding subunit ClpA                                                     |
| Campylobacter showae | VBICamSho45867_0854 | ATP-dependent Clp protease ATP-binding subunit ClpA                                                     |
| Campylobacter showae | VBICamSho45867_0246 | Cell division trigger factor EC 5.2.1.8                                                                 |
| Campylobacter showae | VBICamSho45867_2057 | Chemotaxis protein CheV EC 2.7.3.-                                                                      |
| Campylobacter showae | VBICamSho45867_0502 | Chemotaxis regulator - transmits chemoreceptor signals to flagellar motor components CheY               |
| Campylobacter showae | VBICamSho45867_0370 | ClpB protein                                                                                            |
| Campylobacter showae | VBICamSho45867_2227 | Coproporphyrinogen III oxidase 2C oxygen-independent EC 1.3.99.22                                       |
| Campylobacter showae | VBICamSho45867_1351 | D-glycero-D-manno-heptose 1 2C7-bisphosphate phosphatase EC 3.1.1.-                                     |
| Campylobacter showae | VBICamSho45867_2034 | DegT DnrJ EryC1 StrS aminotransferase                                                                   |
| Campylobacter showae | VBICamSho45867_2062 | Diaminopimelate decarboxylase EC 4.1.1.20                                                               |
| Campylobacter showae | VBICamSho45867_0634 | dTDP-glucose 4 2C6-dehydratase EC 4.2.1.46                                                              |
| Campylobacter showae | VBICamSho45867_0196 | Enolase EC 4.2.1.11                                                                                     |
| Campylobacter showae | VBICamSho45867_1332 | Ferric iron ABC transporter 2C iron-binding protein                                                     |
| Campylobacter showae | VBICamSho45867_1328 | Ferric iron ABC transporter 2C permease protein                                                         |
| Campylobacter showae | VBICamSho45867_0131 | FIG00469919 hypothetical protein                                                                        |
| Campylobacter showae | VBICamSho45867_0697 | FIG00470343 hypothetical protein                                                                        |
| Campylobacter showae | VBICamSho45867_1485 | FIG00472602 hypothetical protein                                                                        |
| Campylobacter showae | VBICamSho45867_1481 | FIG138576 3-oxoacyl-ACP synthase EC 2.3.1.41                                                            |
| Campylobacter showae | VBICamSho45867_2068 | Flagellar assembly protein FliH                                                                         |
| Campylobacter showae | VBICamSho45867_0819 | Flagellar basal-body rod protein FlgB                                                                   |
| Campylobacter showae | VBICamSho45867_2029 | Flagellar basal-body rod protein FlgB                                                                   |
| Campylobacter showae | VBICamSho45867_2028 | Flagellar basal-body rod protein FlgC                                                                   |
| Campylobacter showae | VBICamSho45867_0818 | Flagellar basal-body rod protein FlgC                                                                   |
| Campylobacter showae | VBICamSho45867_1323 | Flagellar basal-body rod protein FlgF                                                                   |
| Campylobacter showae | VBICamSho45867_1308 | Flagellar basal-body rod protein FlgG                                                                   |
| Campylobacter showae | VBICamSho45867_0958 | Flagellar biosynthesis protein FlhA                                                                     |
| Campylobacter showae | VBICamSho45867_2117 | Flagellar biosynthesis protein FlhB                                                                     |
| Campylobacter showae | VBICamSho45867_2170 | Flagellar biosynthesis protein FlhF                                                                     |
| Campylobacter showae | VBICamSho45867_1727 | Flagellar biosynthesis protein FlhF                                                                     |

Table S8

|                      |                     |                                                                                                   |
|----------------------|---------------------|---------------------------------------------------------------------------------------------------|
| Campylobacter showae | VBICamSho45867_1049 | Flagellar biosynthesis protein FliL                                                               |
| Campylobacter showae | VBICamSho45867_0355 | Flagellar biosynthesis protein FliP                                                               |
| Campylobacter showae | VBICamSho45867_1859 | Flagellar biosynthesis protein FliQ                                                               |
| Campylobacter showae | VBICamSho45867_0997 | Flagellar biosynthesis protein FliS                                                               |
| Campylobacter showae | VBICamSho45867_1047 | Flagellar hook-associated protein FlgK                                                            |
| Campylobacter showae | VBICamSho45867_0158 | Flagellar hook-associated protein FlgL                                                            |
| Campylobacter showae | VBICamSho45867_2025 | Flagellar hook-basal body complex protein FliE                                                    |
| Campylobacter showae | VBICamSho45867_1802 | Flagellar L-ring protein FlgH                                                                     |
| Campylobacter showae | VBICamSho45867_2063 | Flagellar M-ring protein FliF                                                                     |
| Campylobacter showae | VBICamSho45867_2064 | Flagellar motor switch protein FliG                                                               |
| Campylobacter showae | VBICamSho45867_1707 | Flagellar motor switch protein FliM                                                               |
| Campylobacter showae | VBICamSho45867_2194 | Flagellar motor switch protein FliM                                                               |
| Campylobacter showae | VBICamSho45867_2071 | Flagellar motor switch protein FliN                                                               |
| Campylobacter showae | VBICamSho45867_2195 | Flagellar motor switch protein FliN                                                               |
| Campylobacter showae | VBICamSho45867_1006 | Flagellar P-ring protein FlgI                                                                     |
| Campylobacter showae | VBICamSho45867_2183 | Flagellar synthesis regulator FleN                                                                |
| Campylobacter showae | VBICamSho45867_1395 | Flagellin                                                                                         |
| Campylobacter showae | VBICamSho45867_1483 | Flagellin C                                                                                       |
| Campylobacter showae | VBICamSho45867_0219 | Flagellum-specific ATP synthase FliI                                                              |
| Campylobacter showae | VBICamSho45867_0043 | Glutamate-1-semialdehyde aminotransferase EC 5.4.3.8                                              |
| Campylobacter showae | VBICamSho45867_1860 | Glutamine synthetase type I EC 6.3.1.2                                                            |
| Campylobacter showae | VBICamSho45867_0160 | GTP pyrophosphokinase EC 2.7.6.5 2C pppGpp synthetase II                                          |
| Campylobacter showae | VBICamSho45867_2201 | hypothetical protein                                                                              |
| Campylobacter showae | VBICamSho45867_0699 | hypothetical protein                                                                              |
| Campylobacter showae | VBICamSho45867_0698 | hypothetical protein                                                                              |
| Campylobacter showae | VBICamSho45867_0058 | hypothetical protein                                                                              |
| Campylobacter showae | VBICamSho45867_1000 | hypothetical protein                                                                              |
| Campylobacter showae | VBICamSho45867_1622 | lcmF-related protein                                                                              |
| Campylobacter showae | VBICamSho45867_0503 | Imidazole glycerol phosphate synthase amidotransferase subunit EC 2.4.2.-                         |
| Campylobacter showae | VBICamSho45867_0905 | Iron (III) ABC transporter 2C ATP-binding protein                                                 |
| Campylobacter showae | VBICamSho45867_0680 | Lipid A biosynthesis lauroyl acyltransferase EC 2.3.1.-                                           |
| Campylobacter showae | VBICamSho45867_1733 | Lipid A export ATP-binding permease protein MsbA                                                  |
| Campylobacter showae | VBICamSho45867_2053 | Lipid-A-disaccharide synthase EC 2.4.1.182                                                        |
| Campylobacter showae | VBICamSho45867_1305 | Lipopolysaccharide ABC transporter 2C ATP-binding protein LptB                                    |
| Campylobacter showae | VBICamSho45867_2255 | Lipopolysaccharide ABC transporter 2C ATP-binding protein LptB                                    |
| Campylobacter showae | VBICamSho45867_0651 | Lipopolysaccharide heptosyltransferase I EC 2.4.1.-                                               |
| Campylobacter showae | VBICamSho45867_0694 | Lipopolysaccharide heptosyltransferase III EC 2.4.1.-                                             |
| Campylobacter showae | VBICamSho45867_0706 | Lipopolysaccharide heptosyltransferase III EC 2.4.1.-                                             |
| Campylobacter showae | VBICamSho45867_0353 | Long-chain-fatty-acid--CoA ligase EC 6.2.1.3                                                      |
| Campylobacter showae | VBICamSho45867_0193 | Macrolide export ATP-binding permease protein MacB EC 3.6.3.-                                     |
| Campylobacter showae | VBICamSho45867_2044 | Magnesium and cobalt efflux protein CorC                                                          |
| Campylobacter showae | VBICamSho45867_1082 | Mannose-1-phosphate guanylyltransferase GDP EC 2.7.7.22                                           |
| Campylobacter showae | VBICamSho45867_1438 | Motility accessory factor                                                                         |
| Campylobacter showae | VBICamSho45867_1294 | MSHA biogenesis protein MshL                                                                      |
| Campylobacter showae | VBICamSho45867_0531 | N-linked glycosylation glycosyltransferase PglG                                                   |
| Campylobacter showae | VBICamSho45867_0549 | Oligosaccharyltransferase PglB EC 2.4.1.119                                                       |
| Campylobacter showae | VBICamSho45867_0548 | Oligosaccharyltransferase PglB EC 2.4.1.119                                                       |
| Campylobacter showae | VBICamSho45867_2230 | Ornithine carbamoyltransferase EC 2.1.3.3                                                         |
| Campylobacter showae | VBICamSho45867_2169 | Outer membrane protein assembly factor YaeT precursor                                             |
| Campylobacter showae | VBICamSho45867_1886 | Paralysed flagella protein PflA                                                                   |
| Campylobacter showae | VBICamSho45867_0023 | Paralysed flagella protein PflA                                                                   |
| Campylobacter showae | VBICamSho45867_2070 | Phosphate regulon transcriptional regulatory protein PhoB SphR                                    |
| Campylobacter showae | VBICamSho45867_1393 | Phosphoheptose isomerase 1 EC 5.3.1.-                                                             |
| Campylobacter showae | VBICamSho45867_0426 | Phospholipid-lipopolysaccharide ABC transporter                                                   |
| Campylobacter showae | VBICamSho45867_1057 | Phosphomannomutase EC 5.4.2.8 Phosphoglucomutase EC 5.4.2.2 Phosphoglucosamine mutase EC 5.4.2.10 |
| Campylobacter showae | VBICamSho45867_0695 | Polysaccharide deacetylase                                                                        |
| Campylobacter showae | VBICamSho45867_1486 | Porphobilinogen deaminase EC 2.5.1.61                                                             |
| Campylobacter showae | VBICamSho45867_2036 | Probable polybeta-D-mannuronate O-acetylase EC 2.3.1.-                                            |
| Campylobacter showae | VBICamSho45867_0802 | Protein export cytoplasm protein SecA ATPase RNA helicase TC 3.A.5.1.1                            |
| Campylobacter showae | VBICamSho45867_1662 | Protein ImpG VasA                                                                                 |
| Campylobacter showae | VBICamSho45867_1440 | Pseudaminic acid synthase EC 4.1.3.-                                                              |
| Campylobacter showae | VBICamSho45867_0145 | Putative coproporphyrinogen III oxidase of BS HemN-type 2C oxygen-independent EC 1.3.99.22        |
| Campylobacter showae | VBICamSho45867_1918 | Putative coproporphyrinogen III oxidase of BS HemN-type 2C oxygen-independent EC 1.3.99.22        |
| Campylobacter showae | VBICamSho45867_2184 | RNA polymerase sigma factor for flagellar operon                                                  |
| Campylobacter showae | VBICamSho45867_1714 | RNA polymerase sigma factor for flagellar operon                                                  |
| Campylobacter showae | VBICamSho45867_1325 | RNA polymerase sigma factor RpoD                                                                  |
| Campylobacter showae | VBICamSho45867_1929 | Rrf2 family transcriptional regulator                                                             |
| Campylobacter showae | VBICamSho45867_0858 | S-ribosylhomocysteine lyase EC 4.4.1.21 Autoinducer-2 production protein LuxS                     |
| Campylobacter showae | VBICamSho45867_1334 | Selenocysteine-specific translation elongation factor                                             |
| Campylobacter showae | VBICamSho45867_2035 | Serine acetyltransferase EC 2.3.1.30                                                              |
| Campylobacter showae | VBICamSho45867_0787 | Signal-transduction regulatory protein FlgR                                                       |
| Campylobacter showae | VBICamSho45867_0159 | Superoxide dismutase Cu-Zn precursor EC 1.15.1.1                                                  |
| Campylobacter showae | VBICamSho45867_0141 | TonB-dependent receptor 3B Outer membrane receptor for ferrienterochelin and colicins             |
| Campylobacter showae | VBICamSho45867_1188 | Type I secretion system ATPase                                                                    |
| Campylobacter showae | VBICamSho45867_1248 | Type II secretion system protein                                                                  |
| Campylobacter showae | VBICamSho45867_1293 | Type II secretory pathway 2C ATPase PuIE Tfp pilus assembly pathway 2C ATPase PilB                |
| Campylobacter showae | VBICamSho45867_0096 | Type IV secretion competence protein VirB10                                                       |
| Campylobacter showae | VBICamSho45867_0584 | UDP-2-acetamido-2-deoxy-D-glucose dehydrogenase NAD+                                              |
| Campylobacter showae | VBICamSho45867_1833 | UDP-3-O-3-hydroxymyristoyl glucosamine N-acyltransferase EC 2.3.1.-                               |

|                           |                     |                                                                                                         |
|---------------------------|---------------------|---------------------------------------------------------------------------------------------------------|
| Campylobacter showae      | VBICamSho45867_1936 | UDP-4-amino-4-deoxy-L-arabinose--oxoglutarate aminotransferase EC 2.6.1.-                               |
| Campylobacter showae      | VBICamSho45867_0983 | UDP-4-amino-4-deoxy-L-arabinose--oxoglutarate aminotransferase EC 2.6.1.-                               |
| Campylobacter showae      | VBICamSho45867_2009 | UDP-galactose-lipid carrier transferase EC 2.-.-.-                                                      |
| Campylobacter showae      | VBICamSho45867_0991 | UDP-galactose-lipid carrier transferase EC 2.-.-.-                                                      |
| Campylobacter showae      | VBICamSho45867_1473 | UDP-GlcNAc-specific C4 2C6 dehydratase C5 epimerase PseB 2C first step of pseudaminic acid biosynthesis |
| Campylobacter showae      | VBICamSho45867_0596 | UDP-glucose 4-epimerase EC 5.1.3.2                                                                      |
| Campylobacter showae      | VBICamSho45867_0589 | UDP-glucose dehydrogenase EC 1.1.1.22                                                                   |
| Campylobacter showae      | VBICamSho45867_0723 | UDP-glucoseheptosyl LPS alpha1 2C3-glucosyltransferase WaaG EC 2.4.1.-                                  |
| Campylobacter showae      | VBICamSho45867_0534 | UDP-N-acetylglucosamine 4 2C6-dehydratase EC 4.2.1.-                                                    |
| Campylobacter showae      | VBICamSho45867_1665 | Uncharacterized protein ImpC                                                                            |
| Campylobacter showae      | VBICamSho45867_2238 | Uroporphyrinogen III decarboxylase EC 4.1.1.37                                                          |
| Campylobacter showae      | VBICamSho45867_1734 | VgrG protein                                                                                            |
| Campylobacter showae      | VBICamSho45867_0867 | Vitamin B12 ABC transporter 2C permease component BtuC                                                  |
| Campylobacter showae      | VBICamSho45867_0162 | YBTP PROTEIN                                                                                            |
| candidate division TM7    | VBICanDiv80122_0431 | Type IV fimbrial assembly ATPase PilB                                                                   |
| candidate division TM7    | VBICanDiv80122_0399 | Heat shock protein 60 family chaperone GroEL                                                            |
| candidate division TM7    | VBICanDiv33328_0082 | dTDP-4-dehydrorhamnose 3 5-epimerase (EC 5.1.3.13) / dTDP-4-dehydrorhamnose reductase (EC 1.1.1.133)    |
| candidate division TM7    | VBICanDiv80122_0262 | 4-keto-6-deoxy-N-Acetyl-D-hexosaminy-(Lipid carrier) aminotransferase                                   |
| candidate division TM7    | VBICanDiv80122_0370 | ABC transporter ATP-binding protein                                                                     |
| candidate division TM7    | VBICanDiv80122_0288 | hypothetical protein                                                                                    |
| candidate division TM7    | VBICanDiv80122_0280 | Ornithine carbamoyltransferase (EC 2.1.3.3)                                                             |
| candidate division TM7    | VBICanDiv80122_0430 | Type IV fimbrial assembly protein PilC                                                                  |
| candidate division TM7    | VBICanDiv80122_0319 | O-antigen export system permease protein RfbD                                                           |
| candidate division TM7    | VBICanDiv80122_0318 | Teichoic acid export ATP-binding protein TagH (EC 3.6.3.40)                                             |
| candidate division TM7    | VBICanDiv33328_0040 | dTDP-glucose 4 6-dehydratase (EC 4.2.1.46)                                                              |
| candidate division TM7    | VBICanDiv80122_0134 | dTDP-glucose 4 6-dehydratase (EC 4.2.1.46)                                                              |
| Capnocytophaga gingivalis | VBICapGin14773_1145 | 2-keto-3-deoxy-D-arabino-heptulosonate-7- phosphate synthase II EC 2.5.1.54                             |
| Capnocytophaga gingivalis | VBICapGin14773_2283 | 2-Keto-3-deoxy-D-manno-octulosonate-8-phosphate synthase EC 2.5.1.55                                    |
| Capnocytophaga gingivalis | VBICapGin14773_1325 | 3-oxoacyl-acyl-carrier protein reductase EC 1.1.1.100                                                   |
| Capnocytophaga gingivalis | VBICapGin14773_1323 | 3-oxoacyl-acyl-carrier-protein synthase 2C KASII EC 2.3.1.41                                            |
| Capnocytophaga gingivalis | VBICapGin14773_2345 | 4-amino-6-deoxy-N-Acetyl-D-hexosaminy-(Lipid carrier) acetyltransferase                                 |
| Capnocytophaga gingivalis | VBICapGin14773_2337 | 4-keto-6-deoxy-N-Acetyl-D-hexosaminy-(Lipid carrier) aminotransferase                                   |
| Capnocytophaga gingivalis | VBICapGin14773_1683 | ABC transporter 2C ATP-binding protein                                                                  |
| Capnocytophaga gingivalis | VBICapGin14773_2395 | Alpha-1 2C3-N-acetylgalactosamine transferase PglA EC 2.4.1.-                                           |
| Capnocytophaga gingivalis | VBICapGin14773_1851 | Aspartate racemase EC 5.1.1.13                                                                          |
| Capnocytophaga gingivalis | VBICapGin14773_1362 | C4 aminotransferase specific for PseB product PseC 2C second step of pseudaminic acid biosynthesis      |
| Capnocytophaga gingivalis | VBICapGin14773_1986 | Campylobacter invasion antigen B CiaB                                                                   |
| Capnocytophaga gingivalis | VBICapGin14773_2224 | Cell division transporter 2C ATP-binding protein FtsE TC 3.A.5.1.1                                      |
| Capnocytophaga gingivalis | VBICapGin14773_2334 | Chemotaxis regulator - transmits chemoreceptor signals to flagellar motor components CheY               |
| Capnocytophaga gingivalis | VBICapGin14773_0042 | ClpB protein                                                                                            |
| Capnocytophaga gingivalis | VBICapGin14773_0312 | Ferric iron ABC transporter 2C permease protein                                                         |
| Capnocytophaga gingivalis | VBICapGin14773_1586 | Ferrichrome-iron receptor                                                                               |
| Capnocytophaga gingivalis | VBICapGin14773_1220 | Flagellar biosynthesis protein FliL                                                                     |
| Capnocytophaga gingivalis | VBICapGin14773_0157 | Flagellar biosynthesis protein FliP                                                                     |
| Capnocytophaga gingivalis | VBICapGin14773_0776 | Flagellar biosynthesis protein FliS                                                                     |
| Capnocytophaga gingivalis | VBICapGin14773_1137 | Flagellar hook-associated protein FlgK                                                                  |
| Capnocytophaga gingivalis | VBICapGin14773_0228 | Flagellar motor rotation protein MotA                                                                   |
| Capnocytophaga gingivalis | VBICapGin14773_1069 | Flagellar P-ring protein FlgI                                                                           |
| Capnocytophaga gingivalis | VBICapGin14773_0950 | Flagellin protein FlaG                                                                                  |
| Capnocytophaga gingivalis | VBICapGin14773_2082 | Flagellum-specific ATP synthase FliI                                                                    |
| Capnocytophaga gingivalis | VBICapGin14773_0570 | Glutamate-1-semialdehyde aminotransferase EC 5.4.3.8                                                    |
| Capnocytophaga gingivalis | VBICapGin14773_0748 | Glutamyl-tRNA reductase EC 1.2.1.70                                                                     |
| Capnocytophaga gingivalis | VBICapGin14773_0530 | GTP pyrophosphokinase EC 2.7.6.5 2C pppGpp synthetase II                                                |
| Capnocytophaga gingivalis | VBICapGin14773_0740 | HtrA protease chaperone protein Serine protease Protease DO EC 3.4.21.-                                 |
| Capnocytophaga gingivalis | VBICapGin14773_1482 | hypothetical protein                                                                                    |
| Capnocytophaga gingivalis | VBICapGin14773_1570 | hypothetical protein                                                                                    |
| Capnocytophaga gingivalis | VBICapGin14773_2239 | Hypothetical radical SAM family enzyme 2C NOT coproporphyrinogen III oxidase 2C oxygen-independent      |
| Capnocytophaga gingivalis | VBICapGin14773_2057 | Iron (III) ABC transporter 2C ATP-binding protein                                                       |
| Capnocytophaga gingivalis | VBICapGin14773_2237 | Lipid A export ATP-binding permease protein MsbA                                                        |
| Capnocytophaga gingivalis | VBICapGin14773_2058 | Long-chain-fatty-acid--CoA ligase EC 6.2.1.3                                                            |
| Capnocytophaga gingivalis | VBICapGin14773_2264 | Major outer membrane protein                                                                            |
| Capnocytophaga gingivalis | VBICapGin14773_2273 | Major outer membrane protein                                                                            |
| Capnocytophaga gingivalis | VBICapGin14773_1292 | Mannose-1-phosphate guanylyltransferase GDP EC 2.7.7.22                                                 |
| Capnocytophaga gingivalis | VBICapGin14773_0054 | Methionine ABC transporter ATP-binding protein                                                          |
| Capnocytophaga gingivalis | VBICapGin14773_1796 | Molybdenum transport ATP-binding protein ModC TC 3.A.1.8.1                                              |
| Capnocytophaga gingivalis | VBICapGin14773_1401 | Motility accessory factor                                                                               |
| Capnocytophaga gingivalis | VBICapGin14773_2335 | N-linked glycosylation glycosyltransferase PglG                                                         |
| Capnocytophaga gingivalis | VBICapGin14773_1845 | Outer membrane fibronectin-binding protein                                                              |
| Capnocytophaga gingivalis | VBICapGin14773_2134 | Phosphoglucosamine mutase EC 5.4.2.10 Phosphomannomutase EC 5.4.2.8                                     |
| Capnocytophaga gingivalis | VBICapGin14773_0050 | Phospholipid-lipopolysaccharide ABC transporter                                                         |
| Capnocytophaga gingivalis | VBICapGin14773_1252 | Phosphomannomutase EC 5.4.2.8 Phosphoglucosamine mutase EC 5.4.2.10                                     |
| Capnocytophaga gingivalis | VBICapGin14773_0762 | Porphobilinogen deaminase EC 2.5.1.61                                                                   |
| Capnocytophaga gingivalis | VBICapGin14773_1782 | Probable polybeta-D-mannuronate O-acetylase EC 2.3.1.-                                                  |
| Capnocytophaga gingivalis | VBICapGin14773_1376 | Pseudaminic acid synthase EC 4.1.3.-                                                                    |
| Capnocytophaga gingivalis | VBICapGin14773_0460 | Putative glutamine transport ATP-binding protein                                                        |
| Capnocytophaga gingivalis | VBICapGin14773_0069 | Putative OMR family iron-siderophore receptor precursor                                                 |
| Capnocytophaga gingivalis | VBICapGin14773_0644 | Putative two-component regulator                                                                        |
| Capnocytophaga gingivalis | VBICapGin14773_1967 | S-ribosylhomocysteine lyase EC 4.4.1.21 Autoinducer-2 production protein LuxS                           |
| Capnocytophaga gingivalis | VBICapGin14773_1601 | Selenocysteine-specific translation elongation factor                                                   |
| Capnocytophaga gingivalis | VBICapGin14773_1143 | Superoxide dismutase Cu-Zn precursor EC 1.15.1.1                                                        |

Table S8

|                           |                      |                                                                                                         |
|---------------------------|----------------------|---------------------------------------------------------------------------------------------------------|
| Capnocytophaga gingivalis | VBICapGin14773_1404  | Teichoic acid export ATP-binding protein TagH EC 3.6.3.40                                               |
| Capnocytophaga gingivalis | VBICapGin14773_0438  | Twitching motility protein PilT                                                                         |
| Capnocytophaga gingivalis | VBICapGin14773_1351  | UDP-GlcNAc-specific C4 2C6 dehydratase C5 epimerase PseB 2C first step of pseudaminic acid biosynthesis |
| Capnocytophaga gingivalis | VBICapGin14773_1438  | UDP-glucose 4-epimerase EC 5.1.3.2                                                                      |
| Capnocytophaga gingivalis | VBICapGin14773_2336  | UDP-N-acetylglucosamine 4 2C6-dehydratase EC 4.2.1.-                                                    |
| Capnocytophaga gingivalis | VBICapGin14773_0270  | Undecaprenyl pyrophosphate synthetase EC 2.5.1.31                                                       |
| Capnocytophaga gingivalis | VBICapGin14773_1301  | Undecaprenyl-phosphate galactosephosphotransferase EC 2.7.8.6                                           |
| Capnocytophaga gingivalis | VBICapGin14773_2045  | Vitamin B12 ABC transporter 2C permease component BtuC                                                  |
| Capnocytophaga gingivalis | VBICapGin14773_2099  | Zinc ABC transporter 2C ATP-binding protein ZnuC                                                        |
| Capnocytophaga gingivalis | VBICapGin14773_2129  | Zinc ABC transporter 2C inner membrane permease protein ZnuB                                            |
| Capnocytophaga ochracea   | VBICapOch61160_1645  | 3-deoxy-D-manno-octulosonic-acid transferase EC 2.-.-.-                                                 |
| Capnocytophaga ochracea   | VBICapOch61160_0407  | 3-deoxy-manno-octulosonate cytidyltransferase EC 2.7.7.38                                               |
| Capnocytophaga ochracea   | VBICapOch61160_1466  | 3-oxoacyl-acyl-carrier protein reductase EC 1.1.1.100                                                   |
| Capnocytophaga ochracea   | VBICapOch61160_0700  | 3-oxoacyl-acyl-carrier protein reductase EC 1.1.1.100                                                   |
| Capnocytophaga ochracea   | VBICapOch61160_2039  | 3-oxoacyl-acyl-carrier protein reductase EC 1.1.1.100                                                   |
| Capnocytophaga ochracea   | VBICapOch61160_0268  | 3-oxoacyl-acyl-carrier-protein synthase 2C KASII EC 2.3.1.41                                            |
| Capnocytophaga ochracea   | VBICapOch61160_0661  | 3-oxoacyl-acyl-carrier-protein synthase 2C KASII EC 2.3.1.41                                            |
| Capnocytophaga ochracea   | VBICapOch61160_1470  | 8-amino-7-oxononanoate synthase EC 2.3.1.47                                                             |
| Capnocytophaga ochracea   | VBICapOch61160_2036  | ABC transporter 2C ATP-binding permease protein                                                         |
| Capnocytophaga ochracea   | VBICapOch61160_0376  | ABC transporter 2C ATP-binding protein                                                                  |
| Capnocytophaga ochracea   | VBICapOch61160_1296  | ABC-type multidrug transport system 2C ATPase component                                                 |
| Capnocytophaga ochracea   | VBICapOch61160_1722  | ABC-type transporter ATP-binding protein                                                                |
| Capnocytophaga ochracea   | VBICapOch61160_1479  | Acetoacetyl-CoA synthetase EC 6.2.1.16 Long-chain-fatty-acid-CoA ligase EC 6.2.1.3                      |
| Capnocytophaga ochracea   | VBICapOch61160_0689  | Acyl carrier protein                                                                                    |
| Capnocytophaga ochracea   | VBICapOch165883_1099 | ADP-heptose synthase EC 2.7.-.- D-glycero-beta-D-manno-heptose 7-phosphate kinase                       |
| Capnocytophaga ochracea   | VBICapOch165883_1228 | ADP-L-glycero-D-manno-heptose-6-epimerase EC 5.1.3.20                                                   |
| Capnocytophaga ochracea   | VBICapOch165883_0130 | Alpha-1 2C4-N-acetylgalactosamine transferase PglH EC 2.4.1.-                                           |
| Capnocytophaga ochracea   | VBICapOch165883_0053 | Alpha-1 2C4-N-acetylgalactosamine transferase PglJ EC 2.4.1.-                                           |
| Capnocytophaga ochracea   | VBICapOch61160_1334  | Anthranilate synthase 2C amidotransferase component EC 4.1.3.27 Anthranilate phosphoribosyltransferase  |
| Capnocytophaga ochracea   | VBICapOch165883_2006 | Arabinose 5-phosphate isomerase EC 5.3.1.13                                                             |
| Capnocytophaga ochracea   | VBICapOch61160_1427  | Arabinose 5-phosphate isomerase EC 5.3.1.13                                                             |
| Capnocytophaga ochracea   | VBICapOch61160_0685  | Aspartate 1-decarboxylase EC 4.1.1.11                                                                   |
| Capnocytophaga ochracea   | VBICapOch61160_0109  | ATP synthase alpha chain EC 3.6.3.14                                                                    |
| Capnocytophaga ochracea   | VBICapOch61160_1458  | ATP synthase alpha chain EC 3.6.3.14                                                                    |
| Capnocytophaga ochracea   | VBICapOch61160_1179  | ATP synthase beta chain EC 3.6.3.14                                                                     |
| Capnocytophaga ochracea   | VBICapOch61160_0108  | ATP synthase beta chain EC 3.6.3.14                                                                     |
| Capnocytophaga ochracea   | VBICapOch61160_0956  | ATP-dependent Clp protease ATP-binding subunit ClpA                                                     |
| Capnocytophaga ochracea   | VBICapOch61160_1183  | Capsule biosynthesis protein capA                                                                       |
| Capnocytophaga ochracea   | VBICapOch61160_0429  | Cell division transporter 2C ATP-binding protein FtsE TC 3.A.5.1.1                                      |
| Capnocytophaga ochracea   | VBICapOch61160_1253  | ClpB protein                                                                                            |
| Capnocytophaga ochracea   | VBICapOch165883_1405 | D-glycero-D-manno-heptose 1 2C7-bisphosphate phosphatase EC 3.1.1.-                                     |
| Capnocytophaga ochracea   | VBICapOch61160_1754  | dTDP-4-dehydrorhamnose 3 2C5-epimerase EC 5.1.3.13                                                      |
| Capnocytophaga ochracea   | VBICapOch61160_1755  | dTDP-4-dehydrorhamnose reductase EC 1.1.1.133                                                           |
| Capnocytophaga ochracea   | VBICapOch61160_1778  | dTDP-glucose 4 2C6-dehydratase EC 4.2.1.46                                                              |
| Capnocytophaga ochracea   | VBICapOch165883_0443 | dTDP-glucose 4 2C6-dehydratase EC 4.2.1.46                                                              |
| Capnocytophaga ochracea   | VBICapOch61160_1197  | Ferrochelatase 2C protoheme ferro-lyase EC 4.99.1.1                                                     |
| Capnocytophaga ochracea   | VBICapOch61160_0072  | FIG00471093 hypothetical protein                                                                        |
| Capnocytophaga ochracea   | VBICapOch61160_0007  | FIG00471093 hypothetical protein                                                                        |
| Capnocytophaga ochracea   | VBICapOch165883_2172 | FIG00471093 hypothetical protein                                                                        |
| Capnocytophaga ochracea   | VBICapOch61160_0095  | FIG00471093 hypothetical protein                                                                        |
| Capnocytophaga ochracea   | VBICapOch165883_1449 | Flagellar basal-body rod modification protein FlgD                                                      |
| Capnocytophaga ochracea   | VBICapOch165883_1446 | Flagellar biosynthesis protein FlhR                                                                     |
| Capnocytophaga ochracea   | VBICapOch165883_1451 | Flagellar hook protein FlgE                                                                             |
| Capnocytophaga ochracea   | VBICapOch165883_1820 | Flagellar hook subunit protein                                                                          |
| Capnocytophaga ochracea   | VBICapOch61160_1195  | Gamma-glutamyltranspeptidase EC 2.3.2.2                                                                 |
| Capnocytophaga ochracea   | VBICapOch61160_1737  | Glucose-1-phosphate thymidyltransferase EC 2.7.7.24                                                     |
| Capnocytophaga ochracea   | VBICapOch61160_0449  | Glucose-6-phosphate isomerase EC 5.3.1.9                                                                |
| Capnocytophaga ochracea   | VBICapOch61160_0547  | Glutamate-1-semialdehyde aminotransferase EC 5.4.3.8                                                    |
| Capnocytophaga ochracea   | VBICapOch61160_1310  | Glycosyl transferase 2C group 2 family protein                                                          |
| Capnocytophaga ochracea   | VBICapOch165883_0055 | Glycosyl transferase 2Cgroup 2 family 2C anthrose biosynthesis                                          |
| Capnocytophaga ochracea   | VBICapOch61160_1992  | GTP pyrophosphokinase EC 2.7.6.5 2C pppGpp synthetase II                                                |
| Capnocytophaga ochracea   | VBICapOch61160_0174  | GTP pyrophosphokinase EC 2.7.6.5 2C pppGpp synthetase II                                                |
| Capnocytophaga ochracea   | VBICapOch61160_0228  | Heat shock protein 60 family chaperone GroEL                                                            |
| Capnocytophaga ochracea   | VBICapOch61160_0698  | Hemolysins and related proteins containing CBS domains                                                  |
| Capnocytophaga ochracea   | VBICapOch61160_0306  | hypothetical protein                                                                                    |
| Capnocytophaga ochracea   | VBICapOch61160_2112  | hypothetical protein                                                                                    |
| Capnocytophaga ochracea   | VBICapOch61160_2118  | hypothetical protein                                                                                    |
| Capnocytophaga ochracea   | VBICapOch61160_0331  | hypothetical protein                                                                                    |
| Capnocytophaga ochracea   | VBICapOch61160_0366  | hypothetical protein                                                                                    |
| Capnocytophaga ochracea   | VBICapOch61160_0701  | Hypothetical radical SAM family enzyme 2C NOT coproporphyrinogen III oxidase 2C oxygen-independent      |
| Capnocytophaga ochracea   | VBICapOch165883_1837 | Imidazole glycerol phosphate synthase cyclase subunit EC 4.1.3.-                                        |
| Capnocytophaga ochracea   | VBICapOch165883_1551 | Iron (III) dicitrate transport ATP-binding protein FecE TC 3.A.1.14.1                                   |
| Capnocytophaga ochracea   | VBICapOch165883_1540 | Iron (III) dicitrate transport system permease protein FecD TC 3.A.1.14.1                               |
| Capnocytophaga ochracea   | VBICapOch61160_0801  | Lipid A export ATP-binding permease protein MsbA                                                        |
| Capnocytophaga ochracea   | VBICapOch61160_1835  | Lipid-A-disaccharide synthase EC 2.4.1.182                                                              |
| Capnocytophaga ochracea   | VBICapOch165883_0552 | Lipopolysaccharide heptosyltransferase I EC 2.4.1.-                                                     |
| Capnocytophaga ochracea   | VBICapOch165883_0657 | Lipopolysaccharide heptosyltransferase III EC 2.4.1.-                                                   |
| Capnocytophaga ochracea   | VBICapOch165883_0820 | Lipopolysaccharide heptosyltransferase III EC 2.4.1.-                                                   |
| Capnocytophaga ochracea   | VBICapOch61160_1483  | Malonyl CoA-acyl carrier protein transacylase EC 2.3.1.39                                               |

Table S8

|                                   |                      |                                                                                                            |
|-----------------------------------|----------------------|------------------------------------------------------------------------------------------------------------|
| Capnocytophaga ochracea           | VBICapOch61160_0296  | Manganese superoxide dismutase EC 1.15.1.1                                                                 |
| Capnocytophaga ochracea           | VBICapOch61160_0703  | Mannose-6-phosphate isomerase EC 5.3.1.8                                                                   |
| Capnocytophaga ochracea           | VBICapOch61160_1091  | Mannosyltransferase EC 2.4.1.-                                                                             |
| Capnocytophaga ochracea           | VBICapOch61160_1640  | N-acetylglucosamine deacetylase EC 3.5.1.- 3R-hydroxymyristoyl-acyl carrier protein dehydratase EC 4.2.1.- |
| Capnocytophaga ochracea           | VBICapOch61160_0706  | NAD-dependent glyceraldehyde-3-phosphate dehydrogenase EC 1.2.1.12                                         |
| Capnocytophaga ochracea           | VBICapOch165883_1418 | NAD-dependent glyceraldehyde-3-phosphate dehydrogenase EC 1.2.1.12                                         |
| Capnocytophaga ochracea           | VBICapOch165883_0039 | Oligosaccharyltransferase PglB EC 2.4.1.119                                                                |
| Capnocytophaga ochracea           | VBICapOch165883_1410 | Pantoate--beta-alanine ligase EC 6.3.2.1                                                                   |
| Capnocytophaga ochracea           | VBICapOch61160_1807  | Phosphoribosylaminoimidazole-succinocarboxamide synthase EC 6.3.2.6                                        |
| Capnocytophaga ochracea           | VBICapOch61160_1434  | Pleiotropic regulatory protein                                                                             |
| Capnocytophaga ochracea           | VBICapOch165883_0714 | Polysaccharide deacetylase                                                                                 |
| Capnocytophaga ochracea           | VBICapOch61160_1058  | Porphobilinogen deaminase EC 2.5.1.61                                                                      |
| Capnocytophaga ochracea           | VBICapOch61160_0756  | Probable polybeta-D-mannuronate O-acetylase EC 2.3.1.-                                                     |
| Capnocytophaga ochracea           | VBICapOch165883_1596 | Probable polybeta-D-mannuronate O-acetylase EC 2.3.1.-                                                     |
| Capnocytophaga ochracea           | VBICapOch61160_1090  | Protein export cytoplasm protein SecA ATPase RNA helicase TC 3.A.5.1.1                                     |
| Capnocytophaga ochracea           | VBICapOch61160_1088  | Protein export cytoplasm protein SecA ATPase RNA helicase TC 3.A.5.1.1                                     |
| Capnocytophaga ochracea           | VBICapOch61160_0699  | putative ABC transporter ATP-binding protein                                                               |
| Capnocytophaga ochracea           | VBICapOch165883_0561 | Putative two-domain glycosyltransferase                                                                    |
| Capnocytophaga ochracea           | VBICapOch61160_1432  | Pyruvate dehydrogenase E1 component beta subunit EC 1.2.4.1                                                |
| Capnocytophaga ochracea           | VBICapOch61160_1220  | Rab family protein                                                                                         |
| Capnocytophaga ochracea           | VBICapOch61160_0704  | RNA polymerase sigma factor RpoD                                                                           |
| Capnocytophaga ochracea           | VBICapOch61160_1844  | RteB 2C two-component system response regulator                                                            |
| Capnocytophaga ochracea           | VBICapOch61160_1856  | Serine protease                                                                                            |
| Capnocytophaga ochracea           | VBICapOch61160_0991  | Serine protease                                                                                            |
| Capnocytophaga ochracea           | VBICapOch61160_2019  | Sialidase EC 3.2.1.18                                                                                      |
| Capnocytophaga ochracea           | VBICapOch61160_2071  | Sigma-54 dependent transcriptional regulator response regulator                                            |
| Capnocytophaga ochracea           | VBICapOch165883_1629 | surface array protein                                                                                      |
| Capnocytophaga ochracea           | VBICapOch61160_0694  | Tetraacyldisaccharide 4'-kinase EC 2.7.1.130                                                               |
| Capnocytophaga ochracea           | VBICapOch61160_0100  | TonB-dependent hemin 2C ferrichrome receptor                                                               |
| Capnocytophaga ochracea           | VBICapOch61160_0899  | Transcriptional regulatory protein rprY                                                                    |
| Capnocytophaga ochracea           | VBICapOch61160_0668  | Translation elongation factor Tu                                                                           |
| Capnocytophaga ochracea           | VBICapOch165883_0165 | UDP-2-acetamido-2-deoxy-D-glucose dehydrogenase NAD+                                                       |
| Capnocytophaga ochracea           | VBICapOch61160_1503  | UDP-3-O-3-hydroxymyristoyl glucosamine N-acyltransferase EC 2.3.1.-                                        |
| Capnocytophaga ochracea           | VBICapOch61160_0202  | UDP-3-O-3-hydroxymyristoyl glucosamine N-acyltransferase EC 2.3.1.-                                        |
| Capnocytophaga ochracea           | VBICapOch165883_0406 | UDP-glucose 4-epimerase EC 5.1.3.2                                                                         |
| Capnocytophaga ochracea           | VBICapOch61160_0176  | UDP-glucose 4-epimerase EC 5.1.3.2                                                                         |
| Capnocytophaga ochracea           | VBICapOch61160_0828  | UDP-glucose dehydrogenase EC 1.1.1.22                                                                      |
| Capnocytophaga ochracea           | VBICapOch61160_1690  | UDP-glucose dehydrogenase EC 1.1.1.22                                                                      |
| Capnocytophaga ochracea           | VBICapOch165883_0966 | UDP-glucoseheptosyl LPS alpha1 2C3-glucosyltransferase WaaG EC 2.4.1.-                                     |
| Capnocytophaga ochracea           | VBICapOch61160_1251  | Undecaprenyl pyrophosphate synthetase EC 2.5.1.31                                                          |
| Capnocytophaga ochracea           | VBICapOch61160_0747  | Undecaprenyl-phosphate N-acetylglucosaminyl 1-phosphate transferase EC 2.7.8.-                             |
| Capnocytophaga ochracea           | VBICapOch61160_1297  | Uroporphyrinogen III decarboxylase EC 4.1.1.37                                                             |
| Capnocytophaga sp. oral taxon 329 | VBICapSp148453_5487  | 4-keto-6-deoxy-N-Acetyl-D-hexosaminyl-Lipid carrier aminotransferase                                       |
| Capnocytophaga sp. oral taxon 329 | VBICapSp148453_1083  | Ferrous iron transport protein B                                                                           |
| Capnocytophaga sp. oral taxon 329 | VBICapSp148453_0062  | hypothetical protein                                                                                       |
| Capnocytophaga sp. oral taxon 329 | VBICapSp148453_0246  | Manganese superoxide dismutase EC 1.15.1.1                                                                 |
| Capnocytophaga sp. oral taxon 329 | VBICapSp148453_0248  | Phosphoribosylaminoimidazole-succinocarboxamide synthase EC 6.3.2.6                                        |
| Capnocytophaga sp. oral taxon 329 | VBICapSp148453_1337  | Pleiotropic regulatory protein                                                                             |
| Capnocytophaga sp. oral taxon 329 | VBICapSp148453_1907  | Pyruvate dehydrogenase E1 component beta subunit EC 1.2.4.1                                                |
| Capnocytophaga sp. oral taxon 329 | VBICapSp148453_2111  | Similar to CDP-glucose 4 2C6-dehydratase EC 4.2.1.45                                                       |
| Capnocytophaga sp. oral taxon 329 | VBICapSp148453_4936  | UDP-glucose dehydrogenase EC 1.1.1.22                                                                      |
| Capnocytophaga sp. oral taxon 335 | VBICapSp228426_0342  | 3-oxoacyl-acyl-carrier-protein synthase 2C KASII EC 2.3.1.41                                               |
| Capnocytophaga sp. oral taxon 335 | VBICapSp228426_0548  | ABC transporter 2C ATP-binding permease protein                                                            |
| Capnocytophaga sp. oral taxon 335 | VBICapSp228426_1533  | ABC transporter ATP-binding protein                                                                        |
| Capnocytophaga sp. oral taxon 335 | VBICapSp228426_1631  | ABC transporter ATP-binding protein                                                                        |
| Capnocytophaga sp. oral taxon 335 | VBICapSp228426_0350  | Aspartate 1-decarboxylase EC 4.1.1.11                                                                      |
| Capnocytophaga sp. oral taxon 335 | VBICapSp228426_0345  | ATP synthase alpha chain EC 3.6.3.14                                                                       |
| Capnocytophaga sp. oral taxon 335 | VBICapSp228426_0098  | ATP synthase beta chain EC 3.6.3.14                                                                        |
| Capnocytophaga sp. oral taxon 335 | VBICapSp228426_0334  | Calcium-transporting ATPase                                                                                |
| Capnocytophaga sp. oral taxon 335 | VBICapSp228426_0975  | Enolase EC 4.2.1.11                                                                                        |
| Capnocytophaga sp. oral taxon 335 | VBICapSp228426_0874  | Glycosyltransferase                                                                                        |
| Capnocytophaga sp. oral taxon 335 | VBICapSp228426_1885  | Glycosyltransferase EC 2.4.1.-                                                                             |
| Capnocytophaga sp. oral taxon 335 | VBICapSp228426_0346  | GTP pyrophosphokinase EC 2.7.6.5 2C pppGpp synthetase II                                                   |
| Capnocytophaga sp. oral taxon 335 | VBICapSp228426_0220  | Hemolysins and related proteins containing CBS domains                                                     |
| Capnocytophaga sp. oral taxon 335 | VBICapSp228426_1256  | hypothetical protein                                                                                       |
| Capnocytophaga sp. oral taxon 335 | VBICapSp228426_0348  | Hypothetical radical SAM family enzyme 2C NOT coproporphyrinogen III oxidase 2C oxygen-independent         |
| Capnocytophaga sp. oral taxon 335 | VBICapSp228426_1400  | Lipoprotein releasing system ATP-binding protein LolD                                                      |
| Capnocytophaga sp. oral taxon 335 | VBICapSp228426_1594  | Manganese superoxide dismutase EC 1.15.1.1                                                                 |
| Capnocytophaga sp. oral taxon 335 | VBICapSp228426_1606  | Mannose-6-phosphate isomerase EC 5.3.1.8                                                                   |
| Capnocytophaga sp. oral taxon 335 | VBICapSp228426_1864  | Pleiotropic regulatory protein                                                                             |
| Capnocytophaga sp. oral taxon 335 | VBICapSp228426_1457  | Probable polybeta-D-mannuronate O-acetylase EC 2.3.1.-                                                     |
| Capnocytophaga sp. oral taxon 335 | VBICapSp228426_0470  | putative ABC transporter ATP-binding protein                                                               |
| Capnocytophaga sp. oral taxon 335 | VBICapSp228426_1541  | Pyridoxamine 5'-phosphate oxidase EC 1.4.3.5                                                               |
| Capnocytophaga sp. oral taxon 335 | VBICapSp228426_1715  | Pyruvate dehydrogenase E1 component beta subunit EC 1.2.4.1                                                |
| Capnocytophaga sp. oral taxon 335 | VBICapSp228426_0785  | Sigma-54 dependent transcriptional regulator response regulator                                            |
| Capnocytophaga sp. oral taxon 335 | VBICapSp228426_0672  | Tetraacyldisaccharide 4'-kinase EC 2.7.1.130                                                               |
| Capnocytophaga sp. oral taxon 335 | VBICapSp228426_0323  | Transcriptional regulator                                                                                  |
| Capnocytophaga sp. oral taxon 335 | VBICapSp228426_0792  | Transcriptional regulatory protein rprY                                                                    |
| Capnocytophaga sp. oral taxon 335 | VBICapSp228426_0312  | Two-component system sensor histidine kinase response regulator 2C hybrid                                  |

Table S8

|                                   |                     |                                                                                          |
|-----------------------------------|---------------------|------------------------------------------------------------------------------------------|
| Capnocytophaga sp. oral taxon 335 | VBICapSp228426_0147 | UDP-glucose 4-epimerase EC 5.1.3.2                                                       |
| Capnocytophaga sp. oral taxon 335 | VBICapSp228426_2103 | UDP-N-acetylglucosamine 2-epimerase EC 5.1.3.14                                          |
| Capnocytophaga sp. oral taxon 335 | VBICapSp228426_0349 | Uroporphyrinogen III decarboxylase EC 4.1.1.37                                           |
| Capnocytophaga sp. oral taxon 338 | VBICapSp172314_1188 | 4-keto-6-deoxy-N-Acetyl-D-hexosaminyL-Lipid carrier aminotransferase                     |
| Capnocytophaga sp. oral taxon 338 | VBICapSp172314_1645 | Alkyl hydroperoxide reductase subunit C-like protein                                     |
| Capnocytophaga sp. oral taxon 338 | VBICapSp172314_0770 | CDP-4-dehydro-6-deoxy-D-glucose 3-dehydratase EC 4.2.1.-                                 |
| Capnocytophaga sp. oral taxon 338 | VBICapSp172314_0996 | CDP-6-deoxy-delta-3 2C4-glucoseen reductase-like                                         |
| Capnocytophaga sp. oral taxon 338 | VBICapSp172314_0730 | dTDP-glucose 4 2C6-dehydratase EC 4.2.1.46                                               |
| Capnocytophaga sp. oral taxon 338 | VBICapSp172314_1333 | Ferrous iron transport protein B                                                         |
| Capnocytophaga sp. oral taxon 338 | VBICapSp172314_0953 | Glucose-1-phosphate cytidyltransferase EC 2.7.7.33                                       |
| Capnocytophaga sp. oral taxon 338 | VBICapSp172314_1248 | Lipid carrier UDP-N-acetylgalactosaminyLtransferase EC 2.4.1.-                           |
| Capnocytophaga sp. oral taxon 338 | VBICapSp172314_0771 | Similar to CDP-glucose 4 2C6-dehydratase EC 4.2.1.45                                     |
| Capnocytophaga sp. oral taxon 338 | VBICapSp172314_1126 | UDP-N-acetylglucosamine 4 2C6-dehydratase EC 4.2.1.-                                     |
| Capnocytophaga sp. oral taxon 412 | VBICapSp238772_1525 | 2-Keto-3-deoxy-D-manno-octulosonate-8-phosphate synthase EC 2.5.1.55                     |
| Capnocytophaga sp. oral taxon 412 | VBICapSp238772_0673 | 3-oxoacyl-acyl-carrier protein reductase EC 1.1.1.100                                    |
| Capnocytophaga sp. oral taxon 412 | VBICapSp238772_0099 | 3-oxoacyl-acyl-carrier-protein synthase 2C KASI EC 2.3.1.41                              |
| Capnocytophaga sp. oral taxon 412 | VBICapSp238772_0532 | 3-oxoacyl-acyl-carrier-protein synthase 2C KASII EC 2.3.1.41                             |
| Capnocytophaga sp. oral taxon 412 | VBICapSp238772_0299 | ABC transporter 2C ATP-binding protein                                                   |
| Capnocytophaga sp. oral taxon 412 | VBICapSp238772_1428 | ABC transporter 2C ATP-binding protein                                                   |
| Capnocytophaga sp. oral taxon 412 | VBICapSp238772_1007 | ABC transporter 2C transmembrane regionABC transporter                                   |
| Capnocytophaga sp. oral taxon 412 | VBICapSp238772_1334 | Acetoacetyl-CoA synthetase EC 6.2.1.16 Long-chain-fatty-acid--CoA ligase EC 6.2.1.3      |
| Capnocytophaga sp. oral taxon 412 | VBICapSp238772_0407 | Acyl carrier protein                                                                     |
| Capnocytophaga sp. oral taxon 412 | VBICapSp238772_0969 | Acyl-acyl-carrier-protein--UDP-N- acetylglucosamine O-acyltransferase EC 2.3.1.129       |
| Capnocytophaga sp. oral taxon 412 | VBICapSp238772_1848 | Alkyl hydroperoxide reductase protein C EC 1.6.4.-                                       |
| Capnocytophaga sp. oral taxon 412 | VBICapSp238772_0755 | Arabinose 5-phosphate isomerase EC 5.3.1.13                                              |
| Capnocytophaga sp. oral taxon 412 | VBICapSp238772_0789 | ATP synthase alpha chain EC 3.6.3.14                                                     |
| Capnocytophaga sp. oral taxon 412 | VBICapSp238772_1880 | ATP-dependent Clp protease ATP-binding subunit ClpA                                      |
| Capnocytophaga sp. oral taxon 412 | VBICapSp238772_0341 | Calcium-transporting ATPase                                                              |
| Capnocytophaga sp. oral taxon 412 | VBICapSp238772_0751 | Cell division transporter 2C ATP-binding protein FtsE TC 3.A.5.1.1                       |
| Capnocytophaga sp. oral taxon 412 | VBICapSp238772_1862 | ClpB protein                                                                             |
| Capnocytophaga sp. oral taxon 412 | VBICapSp238772_1794 | Diaminopimelate decarboxylase EC 4.1.1.20                                                |
| Capnocytophaga sp. oral taxon 412 | VBICapSp238772_0555 | DNA-binding response regulator                                                           |
| Capnocytophaga sp. oral taxon 412 | VBICapSp238772_0187 | DNA-binding response regulator 2C AraC family                                            |
| Capnocytophaga sp. oral taxon 412 | VBICapSp238772_0363 | dTDP-4-dehydrorhamnose 3 2C5-epimerase EC 5.1.3.13                                       |
| Capnocytophaga sp. oral taxon 412 | VBICapSp238772_0293 | dTDP-4-dehydrorhamnose reductase EC 1.1.1.133                                            |
| Capnocytophaga sp. oral taxon 412 | VBICapSp238772_1879 | dTDP-4-dehydrorhamnose reductase EC 1.1.1.133                                            |
| Capnocytophaga sp. oral taxon 412 | VBICapSp238772_0750 | Export ABC transporter ATP-binding protein                                               |
| Capnocytophaga sp. oral taxon 412 | VBICapSp238772_0546 | Ferrochelatase 2C protoheme ferro-lyase EC 4.99.1.1                                      |
| Capnocytophaga sp. oral taxon 412 | VBICapSp238772_0195 | Ferrous iron transport protein B                                                         |
| Capnocytophaga sp. oral taxon 412 | VBICapSp238772_1665 | Glucose-1-phosphate thymidyltransferase EC 2.7.7.24                                      |
| Capnocytophaga sp. oral taxon 412 | VBICapSp238772_0061 | Glucose-6-phosphate isomerase EC 5.3.1.9                                                 |
| Capnocytophaga sp. oral taxon 412 | VBICapSp238772_0568 | Glutamyl-tRNA reductase EC 1.2.1.70                                                      |
| Capnocytophaga sp. oral taxon 412 | VBICapSp238772_0384 | Hemolysins and related proteins containing CBS domains                                   |
| Capnocytophaga sp. oral taxon 412 | VBICapSp238772_0182 | Hemolysins and related proteins containing CBS domains                                   |
| Capnocytophaga sp. oral taxon 412 | VBICapSp238772_1094 | histidine kinase EC2.7.13.3                                                              |
| Capnocytophaga sp. oral taxon 412 | VBICapSp238772_1285 | hypothetical protein                                                                     |
| Capnocytophaga sp. oral taxon 412 | VBICapSp238772_1247 | hypothetical protein                                                                     |
| Capnocytophaga sp. oral taxon 412 | VBICapSp238772_1246 | hypothetical protein                                                                     |
| Capnocytophaga sp. oral taxon 412 | VBICapSp238772_1287 | hypothetical protein                                                                     |
| Capnocytophaga sp. oral taxon 412 | VBICapSp238772_1274 | hypothetical protein                                                                     |
| Capnocytophaga sp. oral taxon 412 | VBICapSp238772_1223 | hypothetical protein                                                                     |
| Capnocytophaga sp. oral taxon 412 | VBICapSp238772_1039 | Isochorismate synthase EC 5.4.4.2                                                        |
| Capnocytophaga sp. oral taxon 412 | VBICapSp238772_1910 | Mannose-1-phosphate guanylyltransferase GDP EC 2.7.7.22                                  |
| Capnocytophaga sp. oral taxon 412 | VBICapSp238772_1306 | Mannose-1-phosphate guanylyltransferase GDP EC 2.7.7.22                                  |
| Capnocytophaga sp. oral taxon 412 | VBICapSp238772_1987 | Membrane protein involved in the export of O-antigen 2C teichoic acid lipoteichoic acids |
| Capnocytophaga sp. oral taxon 412 | VBICapSp238772_0608 | Methionyl-tRNA formyltransferase EC 2.1.2.9                                              |
| Capnocytophaga sp. oral taxon 412 | VBICapSp238772_0666 | Ornithine aminotransferase EC 2.6.1.13                                                   |
| Capnocytophaga sp. oral taxon 412 | VBICapSp238772_0726 | Pantoate--beta-alanine ligase EC 6.3.2.1                                                 |
| Capnocytophaga sp. oral taxon 412 | VBICapSp238772_1196 | Peptidyl-prolyl cis-trans isomerase EC 5.2.1.8                                           |
| Capnocytophaga sp. oral taxon 412 | VBICapSp238772_1883 | Phosphoglucomutase EC 5.4.2.2                                                            |
| Capnocytophaga sp. oral taxon 412 | VBICapSp238772_1549 | Phosphoglucomutase EC 5.4.2.2                                                            |
| Capnocytophaga sp. oral taxon 412 | VBICapSp238772_2142 | Phosphomannomutase EC 5.4.2.8 Phosphoglucosamine mutase EC 5.4.2.10                      |
| Capnocytophaga sp. oral taxon 412 | VBICapSp238772_0897 | Phosphomannomutase EC 5.4.2.8 Phosphoglucosamine mutase EC 5.4.2.10                      |
| Capnocytophaga sp. oral taxon 412 | VBICapSp238772_0559 | Porphobilinogen deaminase EC 2.5.1.61                                                    |
| Capnocytophaga sp. oral taxon 412 | VBICapSp238772_0364 | Porphobilinogen synthase EC 4.2.1.24                                                     |
| Capnocytophaga sp. oral taxon 412 | VBICapSp238772_1804 | Pyruvate dehydrogenase E1 component beta subunit EC 1.2.4.1                              |
| Capnocytophaga sp. oral taxon 412 | VBICapSp238772_0601 | RteB 2C two-component system response regulator                                          |
| Capnocytophaga sp. oral taxon 412 | VBICapSp238772_1595 | Serine protease                                                                          |
| Capnocytophaga sp. oral taxon 412 | VBICapSp238772_1876 | Serine protease                                                                          |
| Capnocytophaga sp. oral taxon 412 | VBICapSp238772_1840 | Superoxide dismutase Fe EC 1.15.1.1                                                      |
| Capnocytophaga sp. oral taxon 412 | VBICapSp238772_1084 | TonB-dependent receptor                                                                  |
| Capnocytophaga sp. oral taxon 412 | VBICapSp238772_0289 | Transcriptional regulator                                                                |
| Capnocytophaga sp. oral taxon 412 | VBICapSp238772_2109 | UDP-galactopyranose mutase EC 5.4.99.9                                                   |
| Capnocytophaga sp. oral taxon 412 | VBICapSp238772_0160 | UDP-glucose 4-epimerase EC 5.1.3.2                                                       |
| Capnocytophaga sp. oral taxon 412 | VBICapSp238772_0275 | UDP-N-acetylglucosamine 2-epimerase EC 5.1.3.14                                          |
| Capnocytophaga sp. oral taxon 412 | VBICapSp238772_0250 | UDP-N-acetylglucosamine 4 2C6-dehydratase EC 4.2.1.-                                     |
| Capnocytophaga sp. oral taxon 412 | VBICapSp238772_0551 | Undecaprenyl pyrophosphate synthetase EC 2.5.1.31                                        |
| Capnocytophaga sp. oral taxon 412 | VBICapSp238772_1874 | Undecaprenyl pyrophosphate synthetase EC 2.5.1.31                                        |
| Capnocytophaga sp. oral taxon 412 | VBICapSp238772_0257 | WbjC                                                                                     |

Table S8

|                          |                      |                                                                                                    |
|--------------------------|----------------------|----------------------------------------------------------------------------------------------------|
| Capnocytophaga sputigena | VBICapSpu114331_0821 | 3-oxoacyl-acyl-carrier-protein synthase 2C KASII EC 2.3.1.41                                       |
| Capnocytophaga sputigena | VBICapSpu114331_2321 | 4-keto-6-deoxy-N-Acetyl-D-hexosaminyL-Lipid carrier aminotransferase                               |
| Capnocytophaga sputigena | VBICapSpu114331_0096 | ABC transporter 2C ATP-binding permease protein                                                    |
| Capnocytophaga sputigena | VBICapSpu114331_1302 | Alkyl hydroperoxide reductase subunit C-like protein                                               |
| Capnocytophaga sputigena | VBICapSpu114331_1460 | GDP-mannose 4 2C6-dehydratase EC 4.2.1.47                                                          |
| Capnocytophaga sputigena | VBICapSpu114331_1868 | Glucose-1-phosphate cytidyltransferase EC 2.7.7.33                                                 |
| Capnocytophaga sputigena | VBICapSpu114331_0160 | GTP pyrophosphokinase EC 2.7.6.5 2C pppGpp synthetase II                                           |
| Capnocytophaga sputigena | VBICapSpu114331_0636 | HtrA protease chaperone protein                                                                    |
| Capnocytophaga sputigena | VBICapSpu114331_0958 | Isochorismate synthase EC 5.4.4.2                                                                  |
| Capnocytophaga sputigena | VBICapSpu114331_1435 | Membrane-associated zinc metalloprotease                                                           |
| Capnocytophaga sputigena | VBICapSpu114331_0717 | Phosphoglucomutase EC 5.4.2.2                                                                      |
| Capnocytophaga sputigena | VBICapSpu114331_1455 | Pleiotropic regulatory protein                                                                     |
| Capnocytophaga sputigena | VBICapSpu114331_1504 | Putative O-antigen synthesis protein 2C WbyH                                                       |
| Capnocytophaga sputigena | VBICapSpu114331_2517 | Serine protease                                                                                    |
| Capnocytophaga sputigena | VBICapSpu114331_1521 | Similar to CDP-glucose 4 2C6-dehydratase EC 4.2.1.45                                               |
| Capnocytophaga sputigena | VBICapSpu114331_1163 | Two-component system sensor histidine kinase response regulator 2C hybrid                          |
| Capnocytophaga sputigena | VBICapSpu114331_2018 | UDP-glucose dehydrogenase EC 1.1.1.22                                                              |
| Capnocytophaga sputigena | VBICapSpu114331_2114 | UDP-N-acetylglucosamine 4 2C6-dehydratase EC 4.2.1.-                                               |
| Cardiobacterium hominis  | VBICarHom6741_2218   | 3-deoxy-D-manno-octulosonic-acid transferase EC 2.-.-.-                                            |
| Cardiobacterium hominis  | VBICarHom6741_0387   | 3-oxoacyl-acyl-carrier protein reductase EC 1.1.1.100                                              |
| Cardiobacterium hominis  | VBICarHom6741_1269   | 3-oxoacyl-acyl-carrier protein reductase EC 1.1.1.100                                              |
| Cardiobacterium hominis  | VBICarHom6741_0841   | 3-oxoacyl-acyl-carrier protein reductase EC 1.1.1.100                                              |
| Cardiobacterium hominis  | VBICarHom6741_2100   | 3-oxoacyl-acyl-carrier protein reductase EC 1.1.1.100                                              |
| Cardiobacterium hominis  | VBICarHom6741_0228   | 3-oxoacyl-acyl-carrier-protein synthase 2C KASI EC 2.3.1.41                                        |
| Cardiobacterium hominis  | VBICarHom6741_2031   | 3-oxoacyl-acyl-carrier-protein synthase 2C KASII EC 2.3.1.41                                       |
| Cardiobacterium hominis  | VBICarHom6741_1503   | 3-oxoacyl-acyl-carrier-protein synthase 2C KASII EC 2.3.1.41                                       |
| Cardiobacterium hominis  | VBICarHom6741_1959   | 4-keto-6-deoxy-N-Acetyl-D-hexosaminyL-Lipid carrier aminotransferase                               |
| Cardiobacterium hominis  | VBICarHom6741_2200   | ABC transporter                                                                                    |
| Cardiobacterium hominis  | VBICarHom6741_0225   | ABC transporter 2C ATP-binding permease protein                                                    |
| Cardiobacterium hominis  | VBICarHom6741_0734   | ABC transporter 2C transmembrane regionABC transporter                                             |
| Cardiobacterium hominis  | VBICarHom6741_2193   | ABC transporter 2C transmembrane regionABC transporter                                             |
| Cardiobacterium hominis  | VBICarHom6741_1437   | ABC transporter ATP-binding protein                                                                |
| Cardiobacterium hominis  | VBICarHom6741_1655   | Acetoacetyl-CoA synthetase EC 6.2.1.16 Long-chain-fatty-acid--CoA ligase EC 6.2.1.3                |
| Cardiobacterium hominis  | VBICarHom6741_2314   | Acetylmornithine aminotransferase EC 2.6.1.11 ACOAT                                                |
| Cardiobacterium hominis  | VBICarHom6741_0093   | Acetylmornithine aminotransferase EC 2.6.1.11 ACOAT                                                |
| Cardiobacterium hominis  | VBICarHom6741_1524   | Acetylmornithine aminotransferase EC 2.6.1.11 ACOAT                                                |
| Cardiobacterium hominis  | VBICarHom6741_0101   | Acyl carrier protein                                                                               |
| Cardiobacterium hominis  | VBICarHom6741_1502   | Acyl carrier protein                                                                               |
| Cardiobacterium hominis  | VBICarHom6741_1724   | Alkyl hydroperoxide reductase subunit C-like protein                                               |
| Cardiobacterium hominis  | VBICarHom6741_0588   | Arabinose 5-phosphate isomerase EC 5.3.1.13                                                        |
| Cardiobacterium hominis  | VBICarHom6741_0458   | Aspartate 1-decarboxylase EC 4.1.1.11                                                              |
| Cardiobacterium hominis  | VBICarHom6741_0347   | ATP synthase alpha chain EC 3.6.3.14                                                               |
| Cardiobacterium hominis  | VBICarHom6741_1875   | 4-keto-6-deoxy-N-Acetyl-D-hexosaminyL-Lipid carrier aminotransferase                               |
| Cardiobacterium hominis  | VBICarHom6741_0033   | Calcium-transporting ATPase                                                                        |
| Cardiobacterium hominis  | VBICarHom6741_0376   | ClpB protein                                                                                       |
| Cardiobacterium hominis  | VBICarHom6741_0585   | ClpB protein                                                                                       |
| Cardiobacterium hominis  | VBICarHom6741_1088   | Diaminopimelate decarboxylase EC 4.1.1.20                                                          |
| Cardiobacterium hominis  | VBICarHom6741_1490   | DNA-binding response regulator 2C AraC family                                                      |
| Cardiobacterium hominis  | VBICarHom6741_1352   | dTDP-4-dehydrorhamnose 3 2C5-epimerase EC 5.1.3.13                                                 |
| Cardiobacterium hominis  | VBICarHom6741_1322   | Enolase EC 4.2.1.11                                                                                |
| Cardiobacterium hominis  | VBICarHom6741_0054   | Ferrous iron transport protein B                                                                   |
| Cardiobacterium hominis  | VBICarHom6741_1470   | Ferrous iron transport protein B                                                                   |
| Cardiobacterium hominis  | VBICarHom6741_2156   | Ferrous iron transport protein B                                                                   |
| Cardiobacterium hominis  | VBICarHom6741_2162   | FIG00473249 hypothetical protein                                                                   |
| Cardiobacterium hominis  | VBICarHom6741_1049   | Glucose-1-phosphate thymidyltransferase EC 2.7.7.24                                                |
| Cardiobacterium hominis  | VBICarHom6741_1778   | Glucose-6-phosphate isomerase EC 5.3.1.9                                                           |
| Cardiobacterium hominis  | VBICarHom6741_1180   | Glutamate-1-semialdehyde aminotransferase EC 5.4.3.8                                               |
| Cardiobacterium hominis  | VBICarHom6741_2332   | Glutamyl-tRNA reductase EC 1.2.1.70                                                                |
| Cardiobacterium hominis  | VBICarHom6741_1169   | glycosyl transferase 2C family 2                                                                   |
| Cardiobacterium hominis  | VBICarHom6741_0238   | glycosyl transferase 2C family 2                                                                   |
| Cardiobacterium hominis  | VBICarHom6741_0580   | glycosyltransferase                                                                                |
| Cardiobacterium hominis  | VBICarHom6741_1151   | glycosyltransferase family 4                                                                       |
| Cardiobacterium hominis  | VBICarHom6741_1115   | GTP pyrophosphokinase EC 2.7.6.5 2C pppGpp synthetase II                                           |
| Cardiobacterium hominis  | VBICarHom6741_0280   | Hemolysins and related proteins containing CBS domains                                             |
| Cardiobacterium hominis  | VBICarHom6741_1131   | Hemolysins and related proteins containing CBS domains                                             |
| Cardiobacterium hominis  | VBICarHom6741_2203   | Hemolysins and related proteins containing CBS domains                                             |
| Cardiobacterium hominis  | VBICarHom6741_0402   | histidine kinase EC2.7.13.3                                                                        |
| Cardiobacterium hominis  | VBICarHom6741_0154   | hypothetical protein                                                                               |
| Cardiobacterium hominis  | VBICarHom6741_0129   | hypothetical protein                                                                               |
| Cardiobacterium hominis  | VBICarHom6741_0135   | hypothetical protein                                                                               |
| Cardiobacterium hominis  | VBICarHom6741_0127   | hypothetical protein                                                                               |
| Cardiobacterium hominis  | VBICarHom6741_0441   | Hypothetical radical SAM family enzyme 2C NOT coproporphyrinogen III oxidase 2C oxygen-independent |
| Cardiobacterium hominis  | VBICarHom6741_0654   | Isochorismate synthase EC 5.4.4.2                                                                  |
| Cardiobacterium hominis  | VBICarHom6741_1962   | Lipid carrier UDP-N-acetylgalactosaminytransferase EC 2.4.1.-                                      |
| Cardiobacterium hominis  | VBICarHom6741_0079   | Lipopolysaccharide ABC transporter 2C ATP-binding protein LptB                                     |
| Cardiobacterium hominis  | VBICarHom6741_2351   | Manganese superoxide dismutase EC 1.15.1.1                                                         |
| Cardiobacterium hominis  | VBICarHom6741_0386   | Manganese superoxide dismutase EC 1.15.1.1                                                         |
| Cardiobacterium hominis  | VBICarHom6741_1597   | Mannose-1-phosphate guanylyltransferase GDP EC 2.7.7.22                                            |
| Cardiobacterium hominis  | VBICarHom6741_0345   | Mannose-1-phosphate guanylyltransferase GDP EC 2.7.7.22                                            |

Table S8

|                          |                      |                                                                                 |
|--------------------------|----------------------|---------------------------------------------------------------------------------|
| Cardiobacterium hominis  | VBICarHom6741_1537   | Mannose-6-phosphate isomerase EC 5.3.1.8                                        |
| Cardiobacterium hominis  | VBICarHom6741_0397   | Membrane-associated zinc metalloprotease                                        |
| Cardiobacterium hominis  | VBICarHom6741_0855   | Methionine ABC transporter ATP-binding protein                                  |
| Cardiobacterium hominis  | VBICarHom6741_1031   | Methionyl-tRNA formyltransferase EC 2.1.2.9                                     |
| Cardiobacterium hominis  | VBICarHom6741_0773   | N-acetylglucosamine deacetylase EC 3.5.1.-                                      |
| Cardiobacterium hominis  | VBICarHom6741_1866   | 3R-hydroxymyristoyl-acyl carrier protein dehydratase EC 4.2.1.-                 |
| Cardiobacterium hominis  | VBICarHom6741_0495   | N-acetylneuraminate synthase EC 2.5.1.56                                        |
| Cardiobacterium hominis  | VBICarHom6741_1313   | Nucleoside 5-triphosphatase RdgB dHAPTP 2C dITP 2C XTP-specific EC 3.6.1.15     |
| Cardiobacterium hominis  | VBICarHom6741_2151   | Oxidoreductase 2C short-chain dehydrogenase reductase family                    |
| Cardiobacterium hominis  | VBICarHom6741_0583   | Pantoate--beta-alanine ligase EC 6.3.2.1                                        |
| Cardiobacterium hominis  | VBICarHom6741_0080   | Peptidyl-prolyl cis-trans isomerase EC 5.2.1.8                                  |
| Cardiobacterium hominis  | VBICarHom6741_1531   | Phosphatidate cytidyltransferase EC 2.7.7.41                                    |
| Cardiobacterium hominis  | VBICarHom6741_1622   | Phosphatidate cytidyltransferase EC 2.7.7.41                                    |
| Cardiobacterium hominis  | VBICarHom6741_1740   | Phosphoglucomutase EC 5.4.2.2                                                   |
| Cardiobacterium hominis  | VBICarHom6741_2353   | Phosphomannomutase EC 5.4.2.8 Phosphoglucosamine mutase EC 5.4.2.10             |
| Cardiobacterium hominis  | VBICarHom6741_1843   | Phosphoribosylaminoimidazole-succinocarboxamide synthase EC 6.3.2.6             |
| Cardiobacterium hominis  | VBICarHom6741_0798   | Pleiotropic regulatory protein                                                  |
| Cardiobacterium hominis  | VBICarHom6741_2049   | Porphobilinogen deaminase EC 2.5.1.61                                           |
| Cardiobacterium hominis  | VBICarHom6741_2242   | Probable polybeta-D-mannuronate O-acetylase EC 2.3.1.-                          |
| Cardiobacterium hominis  | VBICarHom6741_2225   | Protein export cytoplasm protein SecA ATPase RNA helicase TC 3.A.5.1.1          |
| Cardiobacterium hominis  | VBICarHom6741_0473   | Protein export cytoplasm protein SecA ATPase RNA helicase TC 3.A.5.1.1          |
| Cardiobacterium hominis  | VBICarHom6741_1818   | putative ABC transporter ATP-binding protein                                    |
| Cardiobacterium hominis  | VBICarHom6741_2254   | Pyruvate dehydrogenase E1 component beta subunit EC 1.2.4.1                     |
| Cardiobacterium hominis  | VBICarHom6741_1504   | RNA polymerase sigma factor RpoD                                                |
| Cardiobacterium hominis  | VBICarHom6741_1046   | RNA polymerase sigma factor RpoD                                                |
| Cardiobacterium hominis  | VBICarHom6741_1122   | RteB 2C two-component system response regulator                                 |
| Cardiobacterium hominis  | VBICarHom6741_0552   | Sialidase EC 3.2.1.18                                                           |
| Cardiobacterium hominis  | VBICarHom6741_0213   | Sigma-54 dependent transcriptional regulator response regulator                 |
| Cardiobacterium hominis  | VBICarHom6741_0652   | Sigma-54 dependent transcriptional regulator response regulator                 |
| Cardiobacterium hominis  | VBICarHom6741_1418   | TonB-dependent receptor                                                         |
| Cardiobacterium hominis  | VBICarHom6741_0799   | Transcriptional regulator                                                       |
| Cardiobacterium hominis  | VBICarHom6741_1181   | Transcriptional regulatory protein rprY                                         |
| Cardiobacterium hominis  | VBICarHom6741_1858   | UDP-glucose 4-epimerase EC 5.1.3.2                                              |
| Cardiobacterium hominis  | VBICarHom6741_1877   | UDP-glucose dehydrogenase EC 1.1.1.22                                           |
| Cardiobacterium hominis  | VBICarHom6741_2084   | UDP-N-acetylglucosamine 4 2C6-dehydratase EC 4.2.1.-                            |
| Cardiobacterium hominis  | VBICarHom6741_0451   | Undecaprenyl pyrophosphate synthetase EC 2.5.1.31                               |
| Cardiobacterium valvarum | VBICarVal163892_0357 | Uroporphyrinogen III decarboxylase EC 4.1.1.37                                  |
| Cardiobacterium valvarum | VBICarVal163892_1264 | 1-acyl-sn-glycerol-3-phosphate acyltransferase EC 2.3.1.51                      |
| Cardiobacterium valvarum | VBICarVal163892_0355 | 2-Keto-3-deoxy-D-manno-octulosonate-8-phosphate synthase EC 2.5.1.55            |
| Cardiobacterium valvarum | VBICarVal163892_0906 | 3R-hydroxymyristoyl-acyl carrier protein dehydratase EC 4.2.1.-                 |
| Cardiobacterium valvarum | VBICarVal163892_0939 | ABC transporter related                                                         |
| Cardiobacterium valvarum | VBICarVal163892_1615 | ABC-type polar amino acid transport system 2C ATPase component                  |
| Cardiobacterium valvarum | VBICarVal163892_0870 | Alcohol dehydrogenase EC 1.1.1.1 3B Acetaldehyde dehydrogenase EC 1.2.1.10      |
| Cardiobacterium valvarum | VBICarVal163892_0811 | Alkaline phosphatase EC 3.1.3.1                                                 |
| Cardiobacterium valvarum | VBICarVal163892_1899 | Alkaline protease secretion protein aprE                                        |
| Cardiobacterium valvarum | VBICarVal163892_1880 | Arabinose 5-phosphate isomerase EC 5.3.1.13                                     |
| Cardiobacterium valvarum | VBICarVal163892_1352 | ATP synthase beta chain EC 3.6.3.14                                             |
| Cardiobacterium valvarum | VBICarVal163892_1230 | Branched-chain amino acid transport ATP-binding protein LivG TC 3.A.1.4.1       |
| Cardiobacterium valvarum | VBICarVal163892_0276 | Enolase EC 4.2.1.11                                                             |
| Cardiobacterium valvarum | VBICarVal163892_0001 | Ferrochelatase 2C protoheme ferro-lyase EC 4.99.1.1                             |
| Cardiobacterium valvarum | VBICarVal163892_1553 | Gamma-glutamyltranspeptidase EC 2.3.2.2                                         |
| Cardiobacterium valvarum | VBICarVal163892_1820 | Glutamate-1-semialdehyde aminotransferase EC 5.4.3.8                            |
| Cardiobacterium valvarum | VBICarVal163892_0054 | GTP pyrophosphokinase EC 2.7.6.5 2C pppGpp synthetase II                        |
| Cardiobacterium valvarum | VBICarVal163892_0623 | Hemolysins and related proteins containing CBS domains                          |
| Cardiobacterium valvarum | VBICarVal163892_0959 | hypothetical protein                                                            |
| Cardiobacterium valvarum | VBICarVal163892_0788 | Leader peptidase Prepilin peptidase EC 3.4.23.43 N-methyltransferase EC 2.1.1.- |
| Cardiobacterium valvarum | VBICarVal163892_1543 | Lipid A biosynthesis lauroyl acyltransferase EC 2.3.1.-                         |
| Cardiobacterium valvarum | VBICarVal163892_0810 | Long-chain-fatty-acid--CoA ligase EC 6.2.1.3                                    |
| Cardiobacterium valvarum | VBICarVal163892_2258 | Membrane-bound lytic murein transglycosylase B precursor EC 3.2.1.-             |
| Cardiobacterium valvarum | VBICarVal163892_0270 | O-antigen export system 2C ATP-binding protein                                  |
| Cardiobacterium valvarum | VBICarVal163892_0167 | Petrobactin ABC transporter 2C permease protein II                              |
| Cardiobacterium valvarum | VBICarVal163892_0132 | Phosphoglucosamine mutase EC 5.4.2.10                                           |
| Cardiobacterium valvarum | VBICarVal163892_0968 | Porphobilinogen deaminase EC 2.5.1.61                                           |
| Cardiobacterium valvarum | VBICarVal163892_2256 | S-ribosylhomocysteine lyase EC 4.4.1.21 Autoinducer-2 production protein LuxS   |
| Cardiobacterium valvarum | VBICarVal163892_0421 | Tetraacyldisaccharide 4'-kinase EC 2.7.1.130                                    |
| Cardiobacterium valvarum | VBICarVal163892_1216 | twitching motility protein PilH                                                 |
| Cardiobacterium valvarum | VBICarVal163892_0515 | two-component system 2C regulatory protein                                      |
| Cardiobacterium valvarum | VBICarVal163892_0353 | type IV pilus biogenesis protein PilJ                                           |
| Catonella morbi          | VBICatMor38740_1072  | UDP-3-O-3-hydroxymyristoyl glucosamine N-acyltransferase EC 2.3.1.-             |
| Catonella morbi          | VBICatMor38740_0399  | UTP--glucose-1-phosphate uridylyltransferase EC 2.7.7.9                         |
| Catonella morbi          | VBICatMor38740_0737  | Anthranyl phosphate transferase EC 2.4.2.18                                     |
| Catonella morbi          | VBICatMor38740_0508  | capsular polysaccharide biosynthesis protein                                    |
| Catonella morbi          | VBICatMor38740_1541  | Glutamyl-tRNA reductase EC 1.2.1.70                                             |
| Catonella morbi          | VBICatMor38740_1677  | GTP pyrophosphokinase EC 2.7.6.5 2C pppGpp synthetase I                         |
| Catonella morbi          | VBICatMor38740_1676  | hypothetical protein                                                            |
| Catonella morbi          | VBICatMor38740_0654  | hypothetical protein                                                            |
| Catonella morbi          | VBICatMor38740_0588  | hypothetical protein                                                            |
| Catonella morbi          | VBICatMor38740_1485  | Iron (III) dicitrate transport ATP-binding protein FecE TC 3.A.1.14.1           |
|                          |                      | Iron (III) dicitrate transport system permease protein FecD TC 3.A.1.14.1       |
|                          |                      | Manganese ABC transporter 2C ATP-binding protein SitB                           |

|                             |                      |                                                                                                     |
|-----------------------------|----------------------|-----------------------------------------------------------------------------------------------------|
| Catonella morbi             | VBICatMor38740_1262  | Manganese ABC transporter 2C inner membrane permease protein SitD                                   |
| Catonella morbi             | VBICatMor38740_1736  | Nucleoside 5-triphosphatase RdgB dHAPTP 2C dITP 2C XTP-specific EC 3.6.1.15                         |
| Catonella morbi             | VBICatMor38740_0984  | Oligopeptide ABC transporter 2C periplasmic oligopeptide-binding protein OppA TC 3.A.1.5.1          |
| Catonella morbi             | VBICatMor38740_1134  | Probable polybeta-D-mannuronate O-acetylase EC 2.3.1.-                                              |
| Catonella morbi             | VBICatMor38740_0795  | Protein export cytoplasm protein SecA ATPase RNA helicase TC 3.A.5.1.1                              |
| Catonella morbi             | VBICatMor38740_0400  | Radical SAM family enzyme 2C similar to coproporphyrinogen III oxidase 2C oxygen-independent        |
| Centipeda periodontii       | VBICenPer171199_1181 | 3-isopropylmalate dehydratase small subunit EC 4.2.1.33                                             |
| Centipeda periodontii       | VBICenPer171199_2339 | Arginine ornithine ABC transporter 2C ATP-binding protein AotP                                      |
| Centipeda periodontii       | VBICenPer171199_2231 | Phosphonate ABC transporter ATP-binding protein TC 3.A.1.9.1                                        |
| Centipeda periodontii       | VBICenPer171199_1288 | Two-component response regulator CreB                                                               |
| Chlamydomophila pneumoniae  | VBIChlPne35719_1097  | 3-deoxy-D-manno-octulosonic-acid transferase EC 2.-.-.-                                             |
| Chlamydomophila pneumoniae  | VBIChlPne35719_0103  | 3-oxoacyl-acyl-carrier protein reductase EC 1.1.1.100                                               |
| Chlamydomophila pneumoniae  | VBIChlPne119813_0108 | 3-oxoacyl-acyl-carrier-protein synthase 2C KASI EC 2.3.1.41                                         |
| Chlamydomophila pneumoniae  | VBIChlPne35719_0095  | 3-oxoacyl-acyl-carrier-protein synthase 2C KASII EC 2.3.1.41                                        |
| Chlamydomophila pneumoniae  | VBIChlPne5522_0103   | ABC transporter 2C transmembrane regionABC transporterPeptidase C39 2C bacteriocin processing       |
| Chlamydomophila pneumoniae  | VBIChlPne27823_1156  | ABC-type bacteriocin lantibiotic exporters 2C contain an N-terminal double-glycine peptidase domain |
| Chlamydomophila pneumoniae  | VBIChlPne35719_0915  | ABC-type Fe3+-hydroxamate transport system 2C periplasmic component                                 |
| Chlamydomophila pneumoniae  | VBIChlPne119813_0101 | ABC-type spermidine putrescine transport systems 2C ATPase components                               |
| Chlamydomophila pneumoniae  | VBIChlPne119813_1123 | amino acid ABC transporter 2C ATP-binding protein                                                   |
| Chlamydomophila pneumoniae  | VBIChlPne27823_0184  | Anthranilate synthase 2C aminase component EC 4.1.3.27                                              |
| Chlamydomophila pneumoniae  | VBIChlPne35719_0757  | ATP synthase alpha chain EC 3.6.3.14                                                                |
| Chlamydomophila pneumoniae  | VBIChlPne27823_0415  | ATP-dependent Clp protease ATP-binding subunit ClpA                                                 |
| Chlamydomophila pneumoniae  | VBIChlPne5522_0224   | ATP-dependent Clp protease ATP-binding subunit ClpA                                                 |
| Chlamydomophila pneumoniae  | VBIChlPne5522_0361   | ATP-dependent Clp protease ATP-binding subunit ClpA                                                 |
| Chlamydomophila pneumoniae  | VBIChlPne5522_0066   | Coproporphyrinogen III oxidase 2C oxygen-independent EC 1.3.99.22                                   |
| Chlamydomophila pneumoniae  | VBIChlPne35719_0063  | Ferrichrome transport ATP-binding protein FhuC TC 3.A.1.14.3                                        |
| Chlamydomophila pneumoniae  | VBIChlPne27823_1067  | Gamma-glutamyltranspeptidase EC 2.3.2.2                                                             |
| Chlamydomophila pneumoniae  | VBIChlPne35719_1091  | Glutamyl-tRNA reductase EC 1.2.1.70                                                                 |
| Chlamydomophila pneumoniae  | VBIChlPne35719_0144  | Glycerol-3-phosphate transporter                                                                    |
| Chlamydomophila pneumoniae  | VBIChlPne119813_0694 | Glycerol-3-phosphate transporter                                                                    |
| Chlamydomophila pneumoniae  | VBIChlPne5522_0087   | GTP pyrophosphokinase EC 2.7.6.5 2C pppGpp synthetase I                                             |
| Chlamydomophila pneumoniae  | VBIChlPne35719_0372  | Histidine ABC transporter 2C permease protein HisQ TC 3.A.1.3.1                                     |
| Chlamydomophila pneumoniae  | VBIChlPne35719_1033  | Iron (III) dicitrate transport ATP-binding protein FecE TC 3.A.1.14.1                               |
| Chlamydomophila pneumoniae  | VBIChlPne119813_1100 | IS629 ORF2                                                                                          |
| Chlamydomophila pneumoniae  | VBIChlPne35719_0671  | Lipid A export ATP-binding permease protein MsbA                                                    |
| Chlamydomophila pneumoniae  | VBIChlPne27823_0090  | Lipid A export ATP-binding permease protein MsbA                                                    |
| Chlamydomophila pneumoniae  | VBIChlPne27823_1016  | Lipid-A-disaccharide synthase EC 2.4.1.182                                                          |
| Chlamydomophila pneumoniae  | VBIChlPne5522_1118   | Long-chain-fatty-acid--CoA ligase EC 6.2.1.3                                                        |
| Chlamydomophila pneumoniae  | VBIChlPne119813_0890 | Magnesium and cobalt efflux protein CorC                                                            |
| Chlamydomophila pneumoniae  | VBIChlPne35719_0613  | Manganese ABC transporter 2C periplasmic-binding protein SitA                                       |
| Chlamydomophila pneumoniae  | VBIChlPne119813_1058 | Membrane-associated zinc metalloprotease                                                            |
| Chlamydomophila pneumoniae  | VBIChlPne27823_0711  | Membrane-bound lytic murein transglycosylase B precursor EC 3.2.1.-                                 |
| Chlamydomophila pneumoniae  | VBIChlPne119813_0151 | Molybdate-binding domain of ModE                                                                    |
| Chlamydomophila pneumoniae  | VBIChlPne5522_0779   | Ornithine carbamoyltransferase EC 2.1.3.3                                                           |
| Chlamydomophila pneumoniae  | VBIChlPne35719_0810  | Outer membrane receptor for ferric coprogen and ferric-rhodotorulic acid                            |
| Chlamydomophila pneumoniae  | VBIChlPne27823_0168  | Polyphosphate kinase 2 EC 2.7.4.1                                                                   |
| Chlamydomophila pneumoniae  | VBIChlPne35719_0866  | Probable polybeta-D-mannuronate O-acetylase EC 2.3.1.-                                              |
| Chlamydomophila pneumoniae  | VBIChlPne27823_0549  | Proposed peptidoglycan lipid II flippase MurJ                                                       |
| Chlamydomophila pneumoniae  | VBIChlPne5522_0404   | putative cytolysin secretion ABC transporter                                                        |
| Chlamydomophila pneumoniae  | VBIChlPne5522_0110   | Putative HlyD family secretion protein                                                              |
| Chlamydomophila pneumoniae  | VBIChlPne119813_0102 | RNA polymerase sigma factor RpoD                                                                    |
| Chlamydomophila pneumoniae  | VBIChlPne27823_0728  | RNA polymerase sigma factor RpoH                                                                    |
| Chlamydomophila pneumoniae  | VBIChlPne119813_0064 | TonB-dependent siderophore receptor                                                                 |
| Chlamydomophila pneumoniae  | VBIChlPne27823_0127  | Transcriptional regulatory protein RtcR                                                             |
| Chlamydomophila pneumoniae  | VBIChlPne27823_1082  | Two-component sensor PilS                                                                           |
| Chlamydomophila pneumoniae  | VBIChlPne27823_0704  | UDP-3-O-3-hydroxymyristoyl N-acetylglucosamine deacetylase EC 3.5.1.-                               |
| Chlamydomophila pneumoniae  | VBIChlPne27823_0652  | Uncharacterized ABC transporter 2C ATP-binding protein YrbF                                         |
| Chlamydomophila pneumoniae  | VBIChlPne119813_0902 | Undecaprenyl pyrophosphate synthetase EC 2.5.1.31                                                   |
| Comamonas testosteroni      | VBIComTes187647_0845 | 3-oxoacyl-acyl-carrier protein reductase EC 1.1.1.100                                               |
| Comamonas testosteroni      | VBIComTes225622_0256 | calcium binding hemolysin protein 2C putative                                                       |
| Comamonas testosteroni      | VBIComTes187647_1346 | Lipopolysaccharide core biosynthesis glycosyl transferase kdtX EC 2.-.-.-                           |
| Comamonas testosteroni      | VBIComTes225622_1664 | Transcriptional regulatory protein RtcR                                                             |
| Comamonas testosteroni      | VBIComTes187647_1816 | twitching motility protein PilG                                                                     |
| Comamonas testosteroni      | VBIComTes225622_0795 | Twitching motility protein PilT                                                                     |
| Corynebacterium diphtheriae | VBICorDip47633_1042  | Membrane-bound lytic murein transglycosylase B precursor EC 3.2.1.-                                 |
| Corynebacterium diphtheriae | VBICorDip47633_1154  | Nitrogen assimilation regulatory protein NtrX                                                       |
| Corynebacterium diphtheriae | VBICorDip47633_0569  | Undecaprenyl pyrophosphate synthetase EC 2.5.1.31                                                   |
| Corynebacterium matruchotii | VBICorMat118582_1830 | 2 C3-dihydroxybenzoate-AMP ligase EC 2.7.7.58 bacillibactin siderophore                             |
| Corynebacterium matruchotii | VBICorMat102808_1306 | 2-component regulator                                                                               |
| Corynebacterium matruchotii | VBICorMat102808_1419 | 3-deoxy-manno-octulosonate cytidyltransferase EC 2.7.7.38                                           |
| Corynebacterium matruchotii | VBICorMat102808_2200 | 3-methylmercaptopyruvate-CoA ligase DmdB                                                            |
| Corynebacterium matruchotii | VBICorMat102808_2258 | 3-oxoacyl-acyl-carrier-protein synthase 2C KASII EC 2.3.1.41                                        |
| Corynebacterium matruchotii | VBICorMat102808_2332 | ABC transporter 2C ATP-binding protein                                                              |
| Corynebacterium matruchotii | VBICorMat118582_0902 | ABC transporter 2C ATP-binding protein                                                              |
| Corynebacterium matruchotii | VBICorMat118582_0502 | ABC transporter 2C ATP-binding protein                                                              |
| Corynebacterium matruchotii | VBICorMat102808_0720 | ABC transporter 2C ATP-binding transmembrane protein                                                |
| Corynebacterium matruchotii | VBICorMat118582_2326 | ABC transporter ATP-binding protein                                                                 |
| Corynebacterium matruchotii | VBICorMat118582_2328 | ABC transporter ATP-binding protein                                                                 |
| Corynebacterium matruchotii | VBICorMat118582_0560 | ABC transporter ATP-binding protein                                                                 |

Table S8

|                             |                      |                                                                                                                   |
|-----------------------------|----------------------|-------------------------------------------------------------------------------------------------------------------|
| Corynebacterium matruchotii | VBICorMat118582_0416 | ABC transporter ATP-binding protein                                                                               |
| Corynebacterium matruchotii | VBICorMat102808_2366 | ABC transporter iron.B12.siderophore.hemin 2C permease component                                                  |
| Corynebacterium matruchotii | VBICorMat118582_0431 | ABC transporter related                                                                                           |
| Corynebacterium matruchotii | VBICorMat118582_0645 | ABC transporter TetB                                                                                              |
| Corynebacterium matruchotii | VBICorMat118582_0652 | ABC-type multidrug transport system 2C ATPase component                                                           |
| Corynebacterium matruchotii | VBICorMat102808_2322 | ABC-type multidrug transport system ATP-binding component yhiH                                                    |
| Corynebacterium matruchotii | VBICorMat102808_2279 | ABC-type transporter 2C ATPase component                                                                          |
| Corynebacterium matruchotii | VBICorMat118582_0715 | ABC-type transporter 2C ATPase component                                                                          |
| Corynebacterium matruchotii | VBICorMat102808_2307 | Acetylornithine aminotransferase EC 2.6.1.11                                                                      |
| Corynebacterium matruchotii | VBICorMat102808_0823 | Acyl carrier protein                                                                                              |
| Corynebacterium matruchotii | VBICorMat118582_0330 | Alkyl hydroperoxide reductase protein C EC 1.6.4.-                                                                |
| Corynebacterium matruchotii | VBICorMat118582_2489 | Alkyl hydroperoxide reductase protein C EC 1.6.4.-                                                                |
| Corynebacterium matruchotii | VBICorMat102808_0706 | Amino acid transport ATP-binding protein                                                                          |
| Corynebacterium matruchotii | VBICorMat118582_2257 | Anthranilate phosphoribosyltransferase EC 2.4.2.18                                                                |
| Corynebacterium matruchotii | VBICorMat118582_0138 | Anthranilate synthase 2C aminase component EC 4.1.3.27                                                            |
| Corynebacterium matruchotii | VBICorMat118582_0950 | Asparagine synthetase glutamine-hydrolyzing EC 6.3.5.4                                                            |
| Corynebacterium matruchotii | VBICorMat118582_1406 | ATP synthase alpha chain EC 3.6.3.14                                                                              |
| Corynebacterium matruchotii | VBICorMat102808_2149 | ATP synthase beta chain EC 3.6.3.14                                                                               |
| Corynebacterium matruchotii | VBICorMat118582_1423 | ATP synthase beta chain EC 3.6.3.14                                                                               |
| Corynebacterium matruchotii | VBICorMat118582_0331 | Bifunctional protein zinc-containing alcohol dehydrogenase 3B quinone oxidoreductase NADPHquinone reductase EC 1. |
| Corynebacterium matruchotii | VBICorMat118582_2412 | Bifunctional protein zinc-containing alcohol dehydrogenase 3B quinone oxidoreductase NADPHquinone reductase EC 1. |
| Corynebacterium matruchotii | VBICorMat118582_1449 | Cell division transporter 2C ATP-binding protein FtsE TC 3.A.5.1.1                                                |
| Corynebacterium matruchotii | VBICorMat102808_0562 | Cell division trigger factor EC 5.2.1.8                                                                           |
| Corynebacterium matruchotii | VBICorMat118582_0437 | Cell division trigger factor EC 5.2.1.8                                                                           |
| Corynebacterium matruchotii | VBICorMat102808_0888 | Chemotaxis regulator - transmits chemoreceptor signals to flagellar motor components CheY                         |
| Corynebacterium matruchotii | VBICorMat102808_1516 | ClpB protein                                                                                                      |
| Corynebacterium matruchotii | VBICorMat118582_2171 | COG1131 ABC-type multidrug transport system 2C ATPase component                                                   |
| Corynebacterium matruchotii | VBICorMat102808_1604 | Coproporphyrinogen III oxidase 2C oxygen-independent EC 1.3.99.22                                                 |
| Corynebacterium matruchotii | VBICorMat102808_0673 | D-alanine--polyphosphoribitol ligase subunit 1 EC 6.1.1.13                                                        |
| Corynebacterium matruchotii | VBICorMat102808_0672 | D-alanine--polyphosphoribitol ligase subunit 1 EC 6.1.1.13                                                        |
| Corynebacterium matruchotii | VBICorMat102808_2328 | DNA-binding response regulator 2C LuxR family                                                                     |
| Corynebacterium matruchotii | VBICorMat118582_1464 | DNA-binding response regulator mtrA                                                                               |
| Corynebacterium matruchotii | VBICorMat102808_2187 | dTDP-4-dehydrorhamnose 3 2C5-epimerase EC 5.1.3.13                                                                |
| Corynebacterium matruchotii | VBICorMat118582_2564 | dTDP-4-dehydrorhamnose 3 2C5-epimerase EC 5.1.3.13                                                                |
| Corynebacterium matruchotii | VBICorMat118582_0256 | dTDP-glucose 4 2C6-dehydratase EC 4.2.1.46                                                                        |
| Corynebacterium matruchotii | VBICorMat118582_2566 | dTDP-glucose 4 2C6-dehydratase EC 4.2.1.46                                                                        |
| Corynebacterium matruchotii | VBICorMat102808_0007 | Enolase EC 4.2.1.11                                                                                               |
| Corynebacterium matruchotii | VBICorMat118582_1622 | Ferrous iron transport protein B                                                                                  |
| Corynebacterium matruchotii | VBICorMat102808_2171 | FIG00494002 hypothetical protein                                                                                  |
| Corynebacterium matruchotii | VBICorMat102808_2037 | FIG00494002 hypothetical protein                                                                                  |
| Corynebacterium matruchotii | VBICorMat102808_1190 | FIG00494338 hypothetical protein                                                                                  |
| Corynebacterium matruchotii | VBICorMat118582_0333 | FIG00545214 hypothetical protein                                                                                  |
| Corynebacterium matruchotii | VBICorMat118582_2401 | FIG00545214 hypothetical protein                                                                                  |
| Corynebacterium matruchotii | VBICorMat118582_0487 | FIG00545275 hypothetical protein                                                                                  |
| Corynebacterium matruchotii | VBICorMat118582_2536 | FIG00546606 hypothetical protein                                                                                  |
| Corynebacterium matruchotii | VBICorMat118582_0309 | FIG00546606 hypothetical protein                                                                                  |
| Corynebacterium matruchotii | VBICorMat118582_0724 | FIG00547760 hypothetical protein                                                                                  |
| Corynebacterium matruchotii | VBICorMat118582_2334 | FIG00548523 hypothetical protein                                                                                  |
| Corynebacterium matruchotii | VBICorMat102808_2367 | FIG00549429 hypothetical protein                                                                                  |
| Corynebacterium matruchotii | VBICorMat102808_1362 | FIG01260812 hypothetical protein                                                                                  |
| Corynebacterium matruchotii | VBICorMat102808_1315 | FIG01260812 hypothetical protein                                                                                  |
| Corynebacterium matruchotii | VBICorMat102808_1901 | FIG01260812 hypothetical protein                                                                                  |
| Corynebacterium matruchotii | VBICorMat102808_1868 | FIG01260812 hypothetical protein                                                                                  |
| Corynebacterium matruchotii | VBICorMat102808_0594 | FIG01288044 hypothetical protein                                                                                  |
| Corynebacterium matruchotii | VBICorMat102808_0591 | FIG01288044 hypothetical protein                                                                                  |
| Corynebacterium matruchotii | VBICorMat102808_0595 | FIG01288044 hypothetical protein                                                                                  |
| Corynebacterium matruchotii | VBICorMat102808_0600 | FIG01288044 hypothetical protein                                                                                  |
| Corynebacterium matruchotii | VBICorMat102808_1252 | FKBP-type peptidyl-prolyl cis-trans isomerase FkIB EC 5.2.1.8                                                     |
| Corynebacterium matruchotii | VBICorMat102808_1418 | Flagellar biosynthesis protein FlhA                                                                               |
| Corynebacterium matruchotii | VBICorMat102808_2115 | Flagellar biosynthesis protein FlhA                                                                               |
| Corynebacterium matruchotii | VBICorMat102808_1016 | Flagellin protein FlaA                                                                                            |
| Corynebacterium matruchotii | VBICorMat102808_1933 | Flagellum-specific ATP synthase FliI                                                                              |
| Corynebacterium matruchotii | VBICorMat102808_1906 | Flagellum-specific ATP synthase FliI                                                                              |
| Corynebacterium matruchotii | VBICorMat118582_0144 | Flp pilus assembly protein 2C ATPase CpaF                                                                         |
| Corynebacterium matruchotii | VBICorMat118582_1720 | FtsK SpoIIIE family protein                                                                                       |
| Corynebacterium matruchotii | VBICorMat118582_2083 | FtsK SpoIIIE family protein                                                                                       |
| Corynebacterium matruchotii | VBICorMat118582_0259 | Glucose-1-phosphate thymidyltransferase EC 2.7.7.24                                                               |
| Corynebacterium matruchotii | VBICorMat118582_2557 | Glucose-1-phosphate thymidyltransferase EC 2.7.7.24                                                               |
| Corynebacterium matruchotii | VBICorMat118582_0562 | Glucose-6-phosphate isomerase EC 5.3.1.9                                                                          |
| Corynebacterium matruchotii | VBICorMat102808_1198 | Glucose-6-phosphate isomerase EC 5.3.1.9                                                                          |
| Corynebacterium matruchotii | VBICorMat102808_2050 | Glucose-6-phosphate isomerase EC 5.3.1.9                                                                          |
| Corynebacterium matruchotii | VBICorMat118582_0158 | Glutamate-1-semialdehyde aminotransferase EC 5.4.3.8                                                              |
| Corynebacterium matruchotii | VBICorMat118582_0975 | Glutamine synthetase type I EC 6.3.1.2                                                                            |
| Corynebacterium matruchotii | VBICorMat118582_1015 | Glutamine synthetase type I EC 6.3.1.2                                                                            |
| Corynebacterium matruchotii | VBICorMat118582_0247 | Glutamyl-tRNA reductase EC 1.2.1.70                                                                               |
| Corynebacterium matruchotii | VBICorMat118582_2586 | Glutamyl-tRNA reductase EC 1.2.1.70                                                                               |
| Corynebacterium matruchotii | VBICorMat118582_0703 | GTP pyrophosphokinase EC 2.7.6.5 2C pppGpp synthetase I                                                           |
| Corynebacterium matruchotii | VBICorMat102808_0815 | GTP pyrophosphokinase EC 2.7.6.5 2C pppGpp synthetase I                                                           |
| Corynebacterium matruchotii | VBICorMat118582_0088 | Heat shock protein 60 family chaperone GroEL                                                                      |

Table S8

|                             |                      |                                                                                                          |
|-----------------------------|----------------------|----------------------------------------------------------------------------------------------------------|
| Corynebacterium matruchotii | VBICorMat102808_1787 | Heat shock protein 60 family chaperone GroEL                                                             |
| Corynebacterium matruchotii | VBICorMat118582_1690 | Heat shock protein 60 family chaperone GroEL                                                             |
| Corynebacterium matruchotii | VBICorMat102808_1092 | Heat shock protein 60 family chaperone GroEL                                                             |
| Corynebacterium matruchotii | VBICorMat102808_2276 | Heme transporter analogous to IsdDEF 2C ATP-binding protein                                              |
| Corynebacterium matruchotii | VBICorMat118582_1956 | Hemoglobin 2C heme-dependent two component system response regulator ChrA                                |
| Corynebacterium matruchotii | VBICorMat118582_0611 | Hemolysins and related proteins containing CBS domains                                                   |
| Corynebacterium matruchotii | VBICorMat102808_0751 | hypothetical protein                                                                                     |
| Corynebacterium matruchotii | VBICorMat118582_1753 | hypothetical protein                                                                                     |
| Corynebacterium matruchotii | VBICorMat118582_0887 | Imidazole glycerol phosphate synthase amidotransferase subunit EC 2.4.2.-                                |
| Corynebacterium matruchotii | VBICorMat118582_0816 | Imidazole glycerol phosphate synthase cyclase subunit EC 4.1.3.-                                         |
| Corynebacterium matruchotii | VBICorMat118582_1796 | Iron (III) dicitrate transport system permease protein FecD TC 3.A.1.14.1                                |
| Corynebacterium matruchotii | VBICorMat118582_2365 | Iron compound ABC uptake transporter substrate-binding protein PiaA                                      |
| Corynebacterium matruchotii | VBICorMat118582_0364 | Iron compound ABC uptake transporter substrate-binding protein PiaA                                      |
| Corynebacterium matruchotii | VBICorMat118582_0705 | Iron-dependent repressor IdeR DtxR                                                                       |
| Corynebacterium matruchotii | VBICorMat118582_1829 | Isochorismatase EC 3.3.2.1 of siderophore biosynthesis                                                   |
| Corynebacterium matruchotii | VBICorMat118582_2033 | L-proline glycine betaine ABC transport system permease protein ProV TC 3.A.1.12.1                       |
| Corynebacterium matruchotii | VBICorMat102808_0739 | Lipid A export ATP-binding permease protein MsbA                                                         |
| Corynebacterium matruchotii | VBICorMat102808_1991 | Lipid-A-disaccharide synthase EC 2.4.1.182                                                               |
| Corynebacterium matruchotii | VBICorMat118582_1848 | Long-chain-fatty-acid--CoA ligase EC 6.2.1.3                                                             |
| Corynebacterium matruchotii | VBICorMat118582_0254 | Long-chain-fatty-acid--CoA ligase EC 6.2.1.3                                                             |
| Corynebacterium matruchotii | VBICorMat118582_2567 | Long-chain-fatty-acid--CoA ligase EC 6.2.1.3                                                             |
| Corynebacterium matruchotii | VBICorMat102808_2430 | Long-chain-fatty-acid--CoA ligase EC 6.2.1.3                                                             |
| Corynebacterium matruchotii | VBICorMat102808_2109 | Low Calcium Response D Type III secretion inner membrane protein SctV                                    |
| Corynebacterium matruchotii | VBICorMat102808_1104 | Low Calcium Response Protein H                                                                           |
| Corynebacterium matruchotii | VBICorMat102808_1931 | Low Calcium Response Protein H                                                                           |
| Corynebacterium matruchotii | VBICorMat118582_1057 | Magnesium and cobalt efflux protein CorC                                                                 |
| Corynebacterium matruchotii | VBICorMat102808_2407 | Malonyl CoA-acyl carrier protein transacylase EC 2.3.1.39                                                |
| Corynebacterium matruchotii | VBICorMat118582_0349 | Manganese ABC transporter 2C ATP-binding protein SitB                                                    |
| Corynebacterium matruchotii | VBICorMat118582_2387 | Manganese ABC transporter 2C ATP-binding protein SitB                                                    |
| Corynebacterium matruchotii | VBICorMat118582_0363 | Manganese ABC transporter 2C periplasmic-binding protein SitA                                            |
| Corynebacterium matruchotii | VBICorMat118582_2386 | Manganese ABC transporter 2C periplasmic-binding protein SitA                                            |
| Corynebacterium matruchotii | VBICorMat118582_1614 | Mannose-1-phosphate guanylyltransferase EC 2.7.7.13                                                      |
| Corynebacterium matruchotii | VBICorMat118582_1497 | Mannose-6-phosphate isomerase EC 5.3.1.8                                                                 |
| Corynebacterium matruchotii | VBICorMat118582_2358 | Methionine ABC transporter ATP-binding protein                                                           |
| Corynebacterium matruchotii | VBICorMat118582_1673 | Methionine ABC transporter ATP-binding protein                                                           |
| Corynebacterium matruchotii | VBICorMat118582_0367 | Methionine ABC transporter ATP-binding protein                                                           |
| Corynebacterium matruchotii | VBICorMat118582_0699 | Methionyl-tRNA formyltransferase EC 2.1.2.9                                                              |
| Corynebacterium matruchotii | VBICorMat102808_1291 | NAD-dependent glyceraldehyde-3-phosphate dehydrogenase EC 1.2.1.12                                       |
| Corynebacterium matruchotii | VBICorMat118582_0692 | NAD-dependent glyceraldehyde-3-phosphate dehydrogenase EC 1.2.1.12                                       |
| Corynebacterium matruchotii | VBICorMat102808_0038 | NAD-dependent glyceraldehyde-3-phosphate dehydrogenase EC 1.2.1.12                                       |
| Corynebacterium matruchotii | VBICorMat102808_1905 | NAD-dependent glyceraldehyde-3-phosphate dehydrogenase EC 1.2.1.12                                       |
| Corynebacterium matruchotii | VBICorMat102808_1093 | NAD-dependent glyceraldehyde-3-phosphate dehydrogenase EC 1.2.1.12                                       |
| Corynebacterium matruchotii | VBICorMat118582_0486 | NADPH-dependent glyceraldehyde-3-phosphate dehydrogenase EC 1.2.1.13                                     |
| Corynebacterium matruchotii | VBICorMat102808_2196 | Nitrate ABC transporter 2C ATP-binding protein                                                           |
| Corynebacterium matruchotii | VBICorMat118582_1279 | Nitrate nitrite transporter                                                                              |
| Corynebacterium matruchotii | VBICorMat118582_0427 | Nucleoside 5-triphosphatase RdgB dHATP 2C dITP 2C XTP-specific EC 3.6.1.15                               |
| Corynebacterium matruchotii | VBICorMat118582_0332 | O-antigen export system 2C ATP-binding protein                                                           |
| Corynebacterium matruchotii | VBICorMat102808_2070 | Oligopeptide ABC transporter 2C periplasmic oligopeptide-binding protein OppA TC 3.A.1.5.1               |
| Corynebacterium matruchotii | VBICorMat102808_0668 | Oligopeptide transport ATP-binding protein OppD TC 3.A.1.5.1                                             |
| Corynebacterium matruchotii | VBICorMat118582_1849 | Oligopeptide transport ATP-binding protein OppF TC 3.A.1.5.1                                             |
| Corynebacterium matruchotii | VBICorMat102808_2295 | Ornithine carbamoyltransferase EC 2.1.3.3                                                                |
| Corynebacterium matruchotii | VBICorMat102808_0094 | Outer membrane protein assembly factor YaeT precursor                                                    |
| Corynebacterium matruchotii | VBICorMat102808_2538 | Pantoate--beta-alanine ligase EC 6.3.2.1                                                                 |
| Corynebacterium matruchotii | VBICorMat102808_0576 | Phage-encoded chromosome degrading nuclease YokF                                                         |
| Corynebacterium matruchotii | VBICorMat118582_2163 | Phenazine biosynthesis protein PhzF like                                                                 |
| Corynebacterium matruchotii | VBICorMat102808_1120 | Phosphoglucosamine mutase EC 5.4.2.10                                                                    |
| Corynebacterium matruchotii | VBICorMat102808_0663 | Phosphoglucosamine mutase EC 5.4.2.10                                                                    |
| Corynebacterium matruchotii | VBICorMat118582_1715 | Phosphoglucosamine mutase EC 5.4.2.10                                                                    |
| Corynebacterium matruchotii | VBICorMat118582_1581 | Phosphomannomutase EC 5.4.2.8                                                                            |
| Corynebacterium matruchotii | VBICorMat102808_1055 | Phosphomannomutase EC 5.4.2.8                                                                            |
| Corynebacterium matruchotii | VBICorMat102808_1722 | Phosphomannomutase EC 5.4.2.8                                                                            |
| Corynebacterium matruchotii | VBICorMat102808_2051 | Phosphomannomutase EC 5.4.2.8                                                                            |
| Corynebacterium matruchotii | VBICorMat102808_2539 | Polyphosphate kinase 2 EC 2.7.4.1                                                                        |
| Corynebacterium matruchotii | VBICorMat118582_2594 | Porphobilinogen deaminase EC 2.5.1.61                                                                    |
| Corynebacterium matruchotii | VBICorMat118582_0186 | Porphobilinogen deaminase EC 2.5.1.61                                                                    |
| Corynebacterium matruchotii | VBICorMat118582_0174 | Porphobilinogen synthase EC 4.2.1.24                                                                     |
| Corynebacterium matruchotii | VBICorMat118582_0907 | Probable serine threonine-protein kinase pknL EC 2.7.11.1                                                |
| Corynebacterium matruchotii | VBICorMat118582_0796 | Prolipoprotein diacylglyceryl transferase EC 2.4.99.-                                                    |
| Corynebacterium matruchotii | VBICorMat102808_0666 | Protein export cytoplasm protein SecA ATPase RNA helicase TC 3.A.5.1.1                                   |
| Corynebacterium matruchotii | VBICorMat118582_0574 | Protein export cytoplasm protein SecA ATPase RNA helicase TC 3.A.5.1.1                                   |
| Corynebacterium matruchotii | VBICorMat102808_1625 | Protein export cytoplasm protein SecA ATPase RNA helicase TC 3.A.5.1.1                                   |
| Corynebacterium matruchotii | VBICorMat102808_1667 | Protein export cytoplasm protein SecA ATPase RNA helicase TC 3.A.5.1.1                                   |
| Corynebacterium matruchotii | VBICorMat118582_1952 | Putative ABC transport system ATP-binding protein                                                        |
| Corynebacterium matruchotii | VBICorMat102808_2403 | Putative ABC transport system exported protein                                                           |
| Corynebacterium matruchotii | VBICorMat118582_2205 | putative ABC transporter                                                                                 |
| Corynebacterium matruchotii | VBICorMat118582_2273 | putative ABC transporter ATP-binding protein                                                             |
| Corynebacterium matruchotii | VBICorMat118582_2170 | putative ABC transporter ATP-binding protein                                                             |
| Corynebacterium matruchotii | VBICorMat118582_0426 | putative ABC transporter ATP-binding protein                                                             |
| Corynebacterium matruchotii | VBICorMat118582_1154 | Putative coproporphyrinogen III oxidase of BS HemN-type 2C oxygen-independent in heat shock gene cluster |

Table S8

|                             |                      |                                                                                                          |
|-----------------------------|----------------------|----------------------------------------------------------------------------------------------------------|
| Corynebacterium matruchotii | VBICorMat102808_0567 | Putative coproporphyrinogen III oxidase of BS HemN-type 2C oxygen-independent in heat shock gene cluster |
| Corynebacterium matruchotii | VBICorMat102808_2511 | putative esterase                                                                                        |
| Corynebacterium matruchotii | VBICorMat102808_2448 | putative esterase                                                                                        |
| Corynebacterium matruchotii | VBICorMat102808_0486 | Putative hemagglutinin hemolysin-related protein                                                         |
| Corynebacterium matruchotii | VBICorMat102808_0175 | Putative hemagglutinin hemolysin-related protein                                                         |
| Corynebacterium matruchotii | VBICorMat102808_0360 | Putative hemagglutinin hemolysin-related protein                                                         |
| Corynebacterium matruchotii | VBICorMat102808_0105 | Putative hemagglutinin hemolysin-related protein                                                         |
| Corynebacterium matruchotii | VBICorMat102808_0172 | Putative hemagglutinin hemolysin-related protein                                                         |
| Corynebacterium matruchotii | VBICorMat102808_0252 | Putative hemagglutinin hemolysin-related protein                                                         |
| Corynebacterium matruchotii | VBICorMat102808_0180 | Putative hemagglutinin hemolysin-related protein                                                         |
| Corynebacterium matruchotii | VBICorMat102808_0550 | Putative hemagglutinin hemolysin-related protein                                                         |
| Corynebacterium matruchotii | VBICorMat102808_0248 | Putative hemagglutinin hemolysin-related protein                                                         |
| Corynebacterium matruchotii | VBICorMat102808_0106 | Putative hemagglutinin hemolysin-related protein                                                         |
| Corynebacterium matruchotii | VBICorMat102808_0151 | Putative hemagglutinin hemolysin-related protein                                                         |
| Corynebacterium matruchotii | VBICorMat102808_0231 | Putative hemagglutinin hemolysin-related protein                                                         |
| Corynebacterium matruchotii | VBICorMat102808_0561 | Putative hemagglutinin hemolysin-related protein                                                         |
| Corynebacterium matruchotii | VBICorMat102808_0559 | Putative hemagglutinin hemolysin-related protein                                                         |
| Corynebacterium matruchotii | VBICorMat102808_0179 | Putative hemagglutinin hemolysin-related protein                                                         |
| Corynebacterium matruchotii | VBICorMat102808_0271 | Putative hemagglutinin hemolysin-related protein                                                         |
| Corynebacterium matruchotii | VBICorMat102808_0150 | Putative hemagglutinin hemolysin-related protein                                                         |
| Corynebacterium matruchotii | VBICorMat102808_0462 | Putative hemagglutinin hemolysin-related protein                                                         |
| Corynebacterium matruchotii | VBICorMat102808_0189 | Putative hemagglutinin hemolysin-related protein                                                         |
| Corynebacterium matruchotii | VBICorMat102808_0506 | Putative hemagglutinin hemolysin-related protein                                                         |
| Corynebacterium matruchotii | VBICorMat102808_2333 | Putative iron ABC transport system 2C ATP-binding protein                                                |
| Corynebacterium matruchotii | VBICorMat118582_1652 | putative phospho-sugar mutase                                                                            |
| Corynebacterium matruchotii | VBICorMat118582_1264 | putative sensor kinase                                                                                   |
| Corynebacterium matruchotii | VBICorMat118582_1456 | Putative two component system sensor kinase                                                              |
| Corynebacterium matruchotii | VBICorMat118582_2149 | Putative two-component system response regulator                                                         |
| Corynebacterium matruchotii | VBICorMat118582_0248 | Pyroline-5-carboxylate reductase EC 1.5.1.2                                                              |
| Corynebacterium matruchotii | VBICorMat118582_1376 | Respiratory nitrate reductase delta chain EC 1.7.99.4                                                    |
| Corynebacterium matruchotii | VBICorMat118582_1321 | Respiratory nitrate reductase gamma chain EC 1.7.99.4                                                    |
| Corynebacterium matruchotii | VBICorMat102808_1705 | RNA polymerase sigma factor RpoD                                                                         |
| Corynebacterium matruchotii | VBICorMat102808_1925 | RNA polymerase sigma factor RpoD                                                                         |
| Corynebacterium matruchotii | VBICorMat118582_1453 | RNA polymerase sigma-70 factor                                                                           |
| Corynebacterium matruchotii | VBICorMat118582_1997 | sensor histidine kinase                                                                                  |
| Corynebacterium matruchotii | VBICorMat118582_0500 | Sensor protein basS pmrB EC 2.7.3.-                                                                      |
| Corynebacterium matruchotii | VBICorMat102808_0697 | Serine protease 2C DegP HtrA 2C do-like EC 3.4.21.-                                                      |
| Corynebacterium matruchotii | VBICorMat118582_0497 | Serine protease precursor MucD AlgY associated with sigma factor RpoE                                    |
| Corynebacterium matruchotii | VBICorMat118582_0135 | serine threonine protein kinase                                                                          |
| Corynebacterium matruchotii | VBICorMat118582_2353 | Serine threonine protein kinase PrkC 2C regulator of stationary phase                                    |
| Corynebacterium matruchotii | VBICorMat118582_2354 | Serine threonine-protein kinase PknA EC 2.7.11.1                                                         |
| Corynebacterium matruchotii | VBICorMat118582_0372 | Serine threonine-protein kinase PknA EC 2.7.11.1                                                         |
| Corynebacterium matruchotii | VBICorMat102808_2063 | Serine threonine-protein kinase pknD EC 2.7.11.1                                                         |
| Corynebacterium matruchotii | VBICorMat102808_1781 | Serine threonine-protein kinase pknD EC 2.7.11.1                                                         |
| Corynebacterium matruchotii | VBICorMat102808_1518 | Serine threonine-protein kinase pknD EC 2.7.11.1                                                         |
| Corynebacterium matruchotii | VBICorMat102808_1090 | Serine threonine-protein kinase pknD EC 2.7.11.1                                                         |
| Corynebacterium matruchotii | VBICorMat102808_0618 | Sialidase EC 3.2.1.18                                                                                    |
| Corynebacterium matruchotii | VBICorMat102808_2198 | Sigma-54 dependent transcriptional regulator                                                             |
| Corynebacterium matruchotii | VBICorMat118582_1617 | SN-glycerol-3-phosphate transport ATP-binding protein UgpC TC 3.A.1.1.3                                  |
| Corynebacterium matruchotii | VBICorMat118582_1914 | SN-glycerol-3-phosphate transport ATP-binding protein UgpC TC 3.A.1.1.3                                  |
| Corynebacterium matruchotii | VBICorMat118582_1745 | subtilase family protein                                                                                 |
| Corynebacterium matruchotii | VBICorMat118582_0145 | Superoxide dismutase Mn EC 1.15.1.1                                                                      |
| Corynebacterium matruchotii | VBICorMat102808_1601 | Translation elongation factor Tu                                                                         |
| Corynebacterium matruchotii | VBICorMat118582_1862 | Translation elongation factor Tu                                                                         |
| Corynebacterium matruchotii | VBICorMat102808_2056 | Translation elongation factor Tu                                                                         |
| Corynebacterium matruchotii | VBICorMat118582_2220 | Transport ATP-binding protein CydD                                                                       |
| Corynebacterium matruchotii | VBICorMat118582_1996 | two-component system 2C response regulator                                                               |
| Corynebacterium matruchotii | VBICorMat118582_1254 | two-component system 2C response regulator                                                               |
| Corynebacterium matruchotii | VBICorMat118582_0501 | two-component system 2C response regulator                                                               |
| Corynebacterium matruchotii | VBICorMat102808_1112 | Type III secretion inner membrane protein SctT                                                           |
| Corynebacterium matruchotii | VBICorMat102808_1686 | Type III secretion protein SctJ                                                                          |
| Corynebacterium matruchotii | VBICorMat102808_2274 | Type IV pilus biogenesis protein PilP                                                                    |
| Corynebacterium matruchotii | VBICorMat102808_0090 | UDP-3-O-3-hydroxymyristoyl glucosamine N-acyltransferase EC 2.3.1.-                                      |
| Corynebacterium matruchotii | VBICorMat102808_2524 | UDP-galactopyranose mutase EC 5.4.99.9                                                                   |
| Corynebacterium matruchotii | VBICorMat118582_2501 | UDP-glucose 4-epimerase EC 5.1.3.2                                                                       |
| Corynebacterium matruchotii | VBICorMat118582_0325 | UDP-glucose 4-epimerase EC 5.1.3.2                                                                       |
| Corynebacterium matruchotii | VBICorMat118582_0157 | UDP-glucose 4-epimerase EC 5.1.3.2                                                                       |
| Corynebacterium matruchotii | VBICorMat118582_0710 | UDP-glucose 4-epimerase EC 5.1.3.2                                                                       |
| Corynebacterium matruchotii | VBICorMat118582_1867 | UDP-glucose dehydrogenase EC 1.1.1.22                                                                    |
| Corynebacterium matruchotii | VBICorMat118582_1055 | Undecaprenyl pyrophosphate synthetase EC 2.5.1.31                                                        |
| Corynebacterium matruchotii | VBICorMat118582_0466 | Undecaprenyl pyrophosphate synthetase EC 2.5.1.31                                                        |
| Corynebacterium matruchotii | VBICorMat118582_1384 | Undecaprenyl-phosphate N-acetylglucosaminyl 1-phosphate transferase EC 2.7.8.-                           |
| Corynebacterium matruchotii | VBICorMat118582_0488 | UTP--glucose-1-phosphate uridylyltransferase EC 2.7.7.9                                                  |
| Corynebacterium matruchotii | VBICorMat102808_1597 | V-type ATP synthase subunit A EC 3.6.3.14                                                                |
| Corynebacterium matruchotii | VBICorMat102808_1063 | V-type ATP synthase subunit A EC 3.6.3.14                                                                |
| Corynebacterium matruchotii | VBICorMat102808_2059 | V-type ATP synthase subunit A EC 3.6.3.14                                                                |
| Corynebacterium matruchotii | VBICorMat102808_1774 | V-type ATP synthase subunit A EC 3.6.3.14                                                                |
| Corynebacterium matruchotii | VBICorMat102808_1084 | V-type ATP synthase subunit B EC 3.6.3.14                                                                |
| Corynebacterium matruchotii | VBICorMat102808_1867 | Zinc ABC transporter 2C ATP-binding protein ZnuC                                                         |

Table S8

|                                    |                       |                                                                                                           |
|------------------------------------|-----------------------|-----------------------------------------------------------------------------------------------------------|
| <i>Corynebacterium urealyticum</i> | VBICorUre58120_0590   | Hemoglobin 2C heme-dependent two component system response regulator ChrA                                 |
| <i>Corynebacterium urealyticum</i> | VBICorUre58120_0238   | Porphobilinogen synthase EC 4.2.1.24                                                                      |
| <i>Corynebacterium urealyticum</i> | VBICorUre58120_0679   | Putative ABC transport system ATP-binding protein                                                         |
| <i>Corynebacterium urealyticum</i> | VBICorUre58120_0488   | UDP-glucose 4-epimerase EC 5.1.3.2                                                                        |
| <i>Corynebacterium urealyticum</i> | VBICorUre58120_0332   | Uroporphyrinogen III decarboxylase EC 4.1.1.37                                                            |
| <i>Cronobacter sakazakii</i>       | VBICroSak107175_0875  | 2 2C3-dihydroxybenzoate-AMP ligase EC 2.7.7.58 bacillibactin siderophore                                  |
| <i>Cronobacter sakazakii</i>       | VBICroSak107175_3293  | ABC transporter                                                                                           |
| <i>Cronobacter sakazakii</i>       | VBICroSak196695_3861  | Cell division transporter 2C ATP-binding protein FtsE TC 3.A.5.1.1                                        |
| <i>Cronobacter sakazakii</i>       | VBICroSak196695_2867  | DNA-binding response regulator mtrA                                                                       |
| <i>Cronobacter sakazakii</i>       | VBICroSak107175_1761  | Fe-bacillibactin uptake system FeuA 2C Fe-bacillibactin binding                                           |
| <i>Cronobacter sakazakii</i>       | VBICroSak196695_1697  | Ferrous iron transport protein B                                                                          |
| <i>Cronobacter sakazakii</i>       | VBICroSak196695_0028  | hypothetical protein                                                                                      |
| <i>Cronobacter sakazakii</i>       | VBICroSak107175_2902  | Iron (III) dicitrate transport system permease protein FecD TC 3.A.1.14.1                                 |
| <i>Cronobacter sakazakii</i>       | VBICroSak107175_2817  | Iron (III) dicitrate transport system permease protein FecD TC 3.A.1.14.1                                 |
| <i>Cronobacter sakazakii</i>       | VBICroSak107175_1050  | Isochorismatase EC 3.3.2.1 of siderophore biosynthesis                                                    |
| <i>Cronobacter sakazakii</i>       | VBICroSak107175_1041  | Isochorismate synthase EC 5.4.4.2                                                                         |
| <i>Cronobacter sakazakii</i>       | VBICroSak196695_2612  | Mannose-1-phosphate guanylyltransferase EC 2.7.7.13                                                       |
| <i>Cronobacter sakazakii</i>       | VBICroSak196695_2714  | Mannose-6-phosphate isomerase EC 5.3.1.8                                                                  |
| <i>Cronobacter sakazakii</i>       | VBICroSak196695_1442  | Methionine ABC transporter ATP-binding protein                                                            |
| <i>Cronobacter sakazakii</i>       | VBICroSak107175_0708  | Oligopeptide transport ATP-binding protein OppF TC 3.A.1.5.1                                              |
| <i>Cronobacter sakazakii</i>       | VBICroSak196695_0194  | Phosphoglucosamine mutase EC 5.4.2.10                                                                     |
| <i>Cronobacter sakazakii</i>       | VBICroSak196695_2663  | Phosphomannomutase EC 5.4.2.8                                                                             |
| <i>Cronobacter sakazakii</i>       | VBICroSak196695_3704  | Protein export cytoplasm protein SecA ATPase RNA helicase TC 3.A.5.1.1                                    |
| <i>Cronobacter sakazakii</i>       | VBICroSak196695_1563  | putative phospho-sugar mutase                                                                             |
| <i>Cronobacter sakazakii</i>       | VBICroSak196695_3773  | RNA polymerase sigma-70 factor                                                                            |
| <i>Cronobacter sakazakii</i>       | VBICroSak196695_2248  | SN-glycerol-3-phosphate transport ATP-binding protein UgpC TC 3.A.1.1.3                                   |
| <i>Cronobacter sakazakii</i>       | VBICroSak196695_0074  | subtilase family protein                                                                                  |
| <i>Cryptobacterium curtum</i>      | VBICryCur116861_0481  | 2-keto-3-deoxy-D-arabino-heptulosonate-7- phosphate synthase II EC 2.5.1.54                               |
| <i>Cryptobacterium curtum</i>      | VBICryCur116861_1313  | ABC transporter related                                                                                   |
| <i>Cryptobacterium curtum</i>      | VBICryCur116861_1043  | ABC transporter TetB                                                                                      |
| <i>Cryptobacterium curtum</i>      | VBICryCur116861_1001  | ABC-type multidrug transport system 2C ATPase component                                                   |
| <i>Cryptobacterium curtum</i>      | VBICryCur116861_0640  | ABC-type transporter 2C ATPase component                                                                  |
| <i>Cryptobacterium curtum</i>      | VBICryCur116861_0114  | Asparagine synthetase glutamine-hydrolyzing EC 6.3.5.4                                                    |
| <i>Cryptobacterium curtum</i>      | VBICryCur116861_1094  | Hemolysins and related proteins containing CBS domains                                                    |
| <i>Cryptobacterium curtum</i>      | VBICryCur116861_0793  | Iron-dependent repressor IdeR DtxR                                                                        |
| <i>Cryptobacterium curtum</i>      | VBICryCur116861_0925  | Methionyl-tRNA formyltransferase EC 2.1.2.9                                                               |
| <i>Cryptobacterium curtum</i>      | VBICryCur116861_0995  | NAD-dependent glyceraldehyde-3-phosphate dehydrogenase EC 1.2.1.12                                        |
| <i>Cryptobacterium curtum</i>      | VBICryCur116861_1239  | Nucleoside 5-triphosphatase RdgB dHATP 2C dITP 2C XTP-specific EC 3.6.1.15                                |
| <i>Cryptobacterium curtum</i>      | VBICryCur116861_0571  | Probable serine threonine-protein kinase pknL EC 2.7.11.1                                                 |
| <i>Cryptobacterium curtum</i>      | VBICryCur116861_1149  | Protein export cytoplasm protein SecA ATPase RNA helicase TC 3.A.5.1.1                                    |
| <i>Cryptobacterium curtum</i>      | VBICryCur116861_0068  | putative ABC transporter ATP-binding protein                                                              |
| <i>Cryptobacterium curtum</i>      | VBICryCur116861_1180  | RNA binding methyltransferase FtsJ like                                                                   |
| <i>Cryptobacterium curtum</i>      | VBICryCur116861_1183  | Transport protein                                                                                         |
| <i>Dialister invisus</i>           | VBIDialInv115189_0602 | Daunorubicin resistance ATP-binding protein drrA                                                          |
| <i>Dialister invisus</i>           | VBIDialInv115189_1739 | Daunorubicin resistance ATP-binding protein drrA                                                          |
| <i>Dialister invisus</i>           | VBIDialInv115189_0165 | glucosaminyltransferase                                                                                   |
| <i>Dialister invisus</i>           | VBIDialInv115189_0922 | Magnesium and cobalt efflux protein CorC                                                                  |
| <i>Dialister invisus</i>           | VBIDialInv115189_0701 | Oligopeptide transport ATP-binding protein OppF TC 3.A.1.5.1                                              |
| <i>Dialister microaerophilus</i>   | VBIDiaMic173032_1220  | Glutamine synthetase type I EC 6.3.1.2                                                                    |
| <i>Dialister microaerophilus</i>   | VBIDiaMic173032_0471  | hypothetical protein                                                                                      |
| <i>Dialister microaerophilus</i>   | VBIDiaMic173032_0046  | Undecaprenyl pyrophosphate synthetase EC 2.5.1.31                                                         |
| <i>Dialister microaerophilus</i>   | VBIDiaMic169777_0098  | Glutamine synthetase type I EC 6.3.1.2                                                                    |
| <i>Dialister microaerophilus</i>   | VBIDiaMic169777_0650  | Hemoglobin-dependent two component system response regulator HrrA                                         |
| <i>Dolosigranulum pigrum</i>       | VBIDolPig169739_1368  | ABC transporter 2C ATP-binding protein                                                                    |
| <i>Dolosigranulum pigrum</i>       | VBIDolPig169739_1063  | FIG00550139 hypothetical protein                                                                          |
| <i>Dolosigranulum pigrum</i>       | VBIDolPig169739_0539  | Flp pilus assembly protein 2C ATPase CpaF                                                                 |
| <i>Dolosigranulum pigrum</i>       | VBIDolPig169739_0414  | Superoxide dismutase Mn EC 1.15.1.1                                                                       |
| <i>Eggerthella lenta</i>           | VBIEggLen106823_2501  | ATP-dependent Clp protease 2C ATP-binding subunit ClpC Negative regulator of genetic competence clcC mecB |
| <i>Eggerthella lenta</i>           | VBIEggLen106823_2066  | ClpB protein                                                                                              |
| <i>Eggerthella lenta</i>           | VBIEggLen106823_1685  | COG1131 ABC-type multidrug transport system 2C ATPase component                                           |
| <i>Eggerthella lenta</i>           | VBIEggLen106823_1543  | hypothetical protein                                                                                      |
| <i>Eggerthella lenta</i>           | VBIEggLen106823_2139  | Pantoate--beta-alanine ligase EC 6.3.2.1                                                                  |
| <i>Eggerthella lenta</i>           | VBIEggLen106823_1448  | putative ABC transporter                                                                                  |
| <i>Eggerthella lenta</i>           | VBIEggLen106823_1799  | putative ABC transporter ATP-binding protein                                                              |
| <i>Eggerthella lenta</i>           | VBIEggLen106823_2098  | serine threonine protein kinase                                                                           |
| <i>Eggerthella lenta</i>           | VBIEggLen106823_0102  | Transport ATP-binding protein CydD                                                                        |
| <i>Eikenella corrodens</i>         | VBIEikCor39471_0505   | 3-isopropylmalate dehydratase small subunit EC 4.2.1.33                                                   |
| <i>Eikenella corrodens</i>         | VBIEikCor39471_1649   | ABC transporter ATP-binding protein                                                                       |
| <i>Eikenella corrodens</i>         | VBIEikCor39471_0647   | ABC transporter iron.B12.siderophore.hemin 2C permease component                                          |
| <i>Eikenella corrodens</i>         | VBIEikCor39471_1762   | ABC-type Fe3+-siderophore transport system 2C ATPase component                                            |
| <i>Eikenella corrodens</i>         | VBIEikCor39471_0487   | ABC-type multidrug transport system ATP-binding component yhiH                                            |
| <i>Eikenella corrodens</i>         | VBIEikCor39471_0454   | Acetylmethionine aminotransferase EC 2.6.1.11                                                             |
| <i>Eikenella corrodens</i>         | VBIEikCor39471_0657   | ATP synthase alpha chain EC 3.6.3.14                                                                      |
| <i>Eikenella corrodens</i>         | VBIEikCor39471_0806   | Diaminopimelate decarboxylase EC 4.1.1.20                                                                 |
| <i>Eikenella corrodens</i>         | VBIEikCor39471_0586   | DNA-binding response regulator 2C LuxR family                                                             |
| <i>Eikenella corrodens</i>         | VBIEikCor39471_1729   | dTDP-4-dehydrorhamnose 3 2C5-epimerase EC 5.1.3.13                                                        |
| <i>Eikenella corrodens</i>         | VBIEikCor39471_1961   | Enolase EC 4.2.1.11                                                                                       |
| <i>Eikenella corrodens</i>         | VBIEikCor39471_1366   | Enolase EC 4.2.1.11                                                                                       |
| <i>Eikenella corrodens</i>         | VBIEikCor39471_2075   | FIG00543822 hypothetical protein                                                                          |

|                            |                      |                                                                                         |
|----------------------------|----------------------|-----------------------------------------------------------------------------------------|
| Eikenella corrodens        | VBIEikCor39471_1269  | FIG00543822 hypothetical protein                                                        |
| Eikenella corrodens        | VBIEikCor39471_2102  | FIG00543822 hypothetical protein                                                        |
| Eikenella corrodens        | VBIEikCor39471_2032  | FIG00543822 hypothetical protein                                                        |
| Eikenella corrodens        | VBIEikCor39471_1248  | FIG00543822 hypothetical protein                                                        |
| Eikenella corrodens        | VBIEikCor39471_1387  | FIG00545275 hypothetical protein                                                        |
| Eikenella corrodens        | VBIEikCor39471_1726  | Glucose-6-phosphate isomerase EC 5.3.1.9                                                |
| Eikenella corrodens        | VBIEikCor39471_2116  | Isochorismatase EC 3.3.2.1 enterobactin siderophore Apo-aryl carrier domain of EntB     |
| Eikenella corrodens        | VBIEikCor39471_0107  | L-proline glycine betaine ABC transport system permease protein ProV TC 3.A.1.12.1      |
| Eikenella corrodens        | VBIEikCor39471_2278  | Lipopolysaccharide biosynthesis protein WzxC                                            |
| Eikenella corrodens        | VBIEikCor39471_0452  | Long-chain-fatty-acid-CoA ligase EC 6.2.1.3                                             |
| Eikenella corrodens        | VBIEikCor39471_0805  | Nitrate nitrite transporter                                                             |
| Eikenella corrodens        | VBIEikCor39471_0453  | Ornithine carbamoyltransferase EC 2.1.3.3                                               |
| Eikenella corrodens        | VBIEikCor39471_0240  | Phenazine biosynthesis protein PhzF like                                                |
| Eikenella corrodens        | VBIEikCor39471_1879  | Protein export cytoplasm protein SecA ATPase RNA helicase TC 3.A.5.1.1                  |
| Eikenella corrodens        | VBIEikCor39471_2133  | Putative ATP-binding component of a transport system                                    |
| Eikenella corrodens        | VBIEikCor39471_1276  | putative RNA polymerase sigma factor                                                    |
| Eikenella corrodens        | VBIEikCor39471_1024  | putative sensor kinase                                                                  |
| Eikenella corrodens        | VBIEikCor39471_0749  | Respiratory nitrate reductase delta chain EC 1.7.99.4                                   |
| Eikenella corrodens        | VBIEikCor39471_0788  | Respiratory nitrate reductase gamma chain EC 1.7.99.4                                   |
| Eikenella corrodens        | VBIEikCor39471_0086  | sensor histidine kinase                                                                 |
| Eikenella corrodens        | VBIEikCor39471_1578  | Sensor protein basS pmrB EC 2.7.3.-                                                     |
| Eikenella corrodens        | VBIEikCor39471_1571  | Serine protease precursor MucD AlgY associated with sigma factor RpoE                   |
| Eikenella corrodens        | VBIEikCor39471_1176  | two-component system 2C response regulator                                              |
| Eikenella corrodens        | VBIEikCor39471_0048  | two-component system 2C response regulator                                              |
| Eikenella corrodens        | VBIEikCor39471_1579  | two-component system 2C response regulator                                              |
| Eikenella corrodens        | VBIEikCor39471_0259  | UDP-galactopyranose mutase EC 5.4.99.9                                                  |
| Eikenella corrodens        | VBIEikCor39471_1364  | Undecaprenyl pyrophosphate synthetase EC 2.5.1.31                                       |
| Eikenella corrodens        | VBIEikCor39471_0736  | Undecaprenyl-phosphate N-acetylglucosaminyl 1-phosphate transferase EC 2.7.8.-          |
| Eikenella corrodens        | VBIEikCor39471_1457  | UTP-glucose-1-phosphate uridylyltransferase EC 2.7.7.9                                  |
| Enterobacter cancerogenus  | VBIEntCan670_4032    | 2-amino-3-ketobutyrate coenzyme A ligase EC 2.3.1.29                                    |
| Enterobacter cancerogenus  | VBIEntCan670_1957    | Alcohol dehydrogenase EC 1.1.1.1 3B Acetaldehyde dehydrogenase EC 1.2.1.10              |
| Enterobacter cancerogenus  | VBIEntCan670_0947    | Aminotransferase                                                                        |
| Enterobacter cancerogenus  | VBIEntCan670_1620    | Cell division transporter 2C ATP-binding protein FtsE TC 3.A.5.1.1                      |
| Enterobacter cancerogenus  | VBIEntCan670_2120    | Ferric enterobactin transport ATP-binding protein FepC TC 3.A.1.14.2                    |
| Enterobacter cancerogenus  | VBIEntCan670_1772    | Flagellar motor rotation protein MotA                                                   |
| Enterobacter cancerogenus  | VBIEntCan670_1049    | Glutamate-1-semialdehyde aminotransferase EC 5.4.3.8                                    |
| Enterobacter cancerogenus  | VBIEntCan670_2893    | Maltose maltodextrin transport ATP-binding protein MalK EC 3.6.3.19                     |
| Enterobacter cancerogenus  | VBIEntCan670_2997    | Nitrogen regulation protein NRI                                                         |
| Enterobacter cancerogenus  | VBIEntCan670_2476    | Putative ATP-binding component of a transport system                                    |
| Enterobacter cancerogenus  | VBIEntCan670_1489    | Thiamin ABC transporter 2C ATPase component Thiamine transport ATP-binding protein thiQ |
| Enterobacter cancerogenus  | VBIEntCan670_1965    | Thiamin ABC transporter 2C ATPase component Thiamine transport ATP-binding protein thiQ |
| Enterobacter cancerogenus  | VBIEntCan670_1610    | Translation elongation factor Tu                                                        |
| Enterobacter cancerogenus  | VBIEntCan670_2306    | Translation elongation factor Tu                                                        |
| Enterobacter cancerogenus  | VBIEntCan670_1964    | Two-component response regulator CreC                                                   |
| Enterobacter cancerogenus  | VBIEntCan670_0986    | type 1 fimbriae anchoring protein FimD                                                  |
| Enterobacter hormaechei    | VBIEntHor171080_0875 | 3-oxoacyl-acyl-carrier-protein synthase 2C KASI EC 2.3.1.41                             |
| Enterobacter hormaechei    | VBIEntHor171080_2996 | Alkyl hydroperoxide reductase protein C EC 1.6.4.-                                      |
| Enterobacter hormaechei    | VBIEntHor171080_4323 | Choline binding protein A                                                               |
| Enterobacter hormaechei    | VBIEntHor171080_3010 | Choline binding protein A                                                               |
| Enterobacter hormaechei    | VBIEntHor171080_2888 | ClpB protein                                                                            |
| Enterobacter hormaechei    | VBIEntHor171080_0876 | Methionyl-tRNA formyltransferase EC 2.1.2.9                                             |
| Enterococcus casseliflavus | VBIEntCas2262_0756   | 3-oxoacyl-acyl-carrier protein reductase EC 1.1.1.100                                   |
| Enterococcus casseliflavus | VBIEntCas2262_0303   | 3-oxoacyl-acyl-carrier-protein synthase 2C KASII EC 2.3.1.41                            |
| Enterococcus casseliflavus | VBIEntCas2262_1979   | ABC-type multidrug transport system 2C ATPase and permease component                    |
| Enterococcus casseliflavus | VBIEntCas127762_1838 | CDP-4-dehydro-6-deoxy-D-glucose 3-dehydratase EC 4.2.1.-                                |
| Enterococcus casseliflavus | VBIEntCas127762_0800 | Choline binding protein A                                                               |
| Enterococcus casseliflavus | VBIEntCas127762_1113 | Choline binding protein A                                                               |
| Enterococcus casseliflavus | VBIEntCas127762_1038 | Choline binding protein A                                                               |
| Enterococcus casseliflavus | VBIEntCas127762_2296 | Enolase EC 4.2.1.11                                                                     |
| Enterococcus casseliflavus | VBIEntCas127762_2604 | Ferrous iron transport protein B                                                        |
| Enterococcus casseliflavus | VBIEntCas127762_2606 | Ferrous iron transport protein B                                                        |
| Enterococcus casseliflavus | VBIEntCas2262_0116   | Heat shock protein 60 family chaperone GroEL                                            |
| Enterococcus casseliflavus | VBIEntCas2262_0569   | hypothetical protein                                                                    |
| Enterococcus casseliflavus | VBIEntCas2262_2239   | Lanthionine biosynthesis protein LanM                                                   |
| Enterococcus casseliflavus | VBIEntCas2262_2686   | Manganese superoxide dismutase EC 1.15.1.1                                              |
| Enterococcus casseliflavus | VBIEntCas127762_1239 | Oligopeptide transport ATP-binding protein OppF TC 3.A.1.5.1                            |
| Enterococcus casseliflavus | VBIEntCas26554_1503  | Peptidyl-prolyl cis-trans isomerase EC 5.2.1.8                                          |
| Enterococcus casseliflavus | VBIEntCas2262_1545   | Phosphate regulon sensor protein PhoR SphS EC 2.7.13.3                                  |
| Enterococcus casseliflavus | VBIEntCas127762_2716 | Phosphate transport ATP-binding protein PstB TC 3.A.1.7.1                               |
| Enterococcus casseliflavus | VBIEntCas2262_1487   | Phosphatidate cytidyltransferase EC 2.7.7.41                                            |
| Enterococcus casseliflavus | VBIEntCas127762_2599 | Porphobilinogen synthase EC 4.2.1.24                                                    |
| Enterococcus casseliflavus | VBIEntCas127762_2993 | Protein export cytoplasm protein SecA ATPase RNA helicase TC 3.A.5.1.1                  |
| Enterococcus casseliflavus | VBIEntCas2262_1036   | Protein export cytoplasm protein SecA ATPase RNA helicase TC 3.A.5.1.1                  |
| Enterococcus casseliflavus | VBIEntCas2262_0313   | Translation elongation factor Tu                                                        |
| Enterococcus casseliflavus | VBIEntCas127762_1629 | Translation elongation factor Tu                                                        |
| Enterococcus casseliflavus | VBIEntCas2262_1592   | Translation elongation factor Tu                                                        |
| Enterococcus casseliflavus | VBIEntCas26554_2368  | Twitching motility protein PilT                                                         |
| Enterococcus casseliflavus | VBIEntCas26554_2604  | Two-component response regulator                                                        |
| Enterococcus casseliflavus | VBIEntCas127762_1312 | UDP-galactopyranose mutase EC 5.4.99.9                                                  |

|                              |                      |                                                                                                            |
|------------------------------|----------------------|------------------------------------------------------------------------------------------------------------|
| Enterococcus casseliflavus   | VBIEntCas127762_2301 | Undecaprenyl diphosphate synthase EC 2.5.1.31                                                              |
| Enterococcus faecalis        | VBIEntFae2828_2195   | Ferrous iron transport protein B                                                                           |
| Enterococcus faecalis        | VBIEntFae2828_0680   | hypothetical protein                                                                                       |
| Enterococcus faecalis        | VBIEntFae2828_2268   | hypothetical protein                                                                                       |
| Enterococcus faecalis        | VBIEntFae2828_1273   | iron-siderophore uptake ABC system ATP-binding component                                                   |
| Enterococcus faecalis        | VBIEntFae66666_1552  | Long-chain-fatty-acid-CoA ligase EC 6.2.1.3                                                                |
| Enterococcus faecalis        | VBIEntFae2828_2277   | Membrane-bound lytic murein transglycosylase B precursor EC 3.2.1.-                                        |
| Enterococcus faecalis        | VBIEntFae91541_0468  | Nitrogen regulation protein NtrX                                                                           |
| Enterococcus faecalis        | VBIEntFae2828_2049   | Outer membrane hemoglobin-haptoglobin utilization protein HpuB                                             |
| Enterococcus faecalis        | VBIEntFae2828_0042   | Protein export cytoplasm protein SecA ATPase RNA helicase TC 3.A.5.1.1                                     |
| Enterococcus faecalis        | VBIEntFae2828_1999   | putative glycosyltransferase protein                                                                       |
| Enterococcus faecalis        | VBIEntFae91541_1082  | sigma-54 dependent response regulator                                                                      |
| Enterococcus faecalis        | VBIEntFae66666_1223  | Type IV pilus biogenesis protein PilM                                                                      |
| Enterococcus faecalis        | VBIEntFae66666_0288  | Type IV pilus biogenesis protein PilN                                                                      |
| Enterococcus faecalis        | VBIEntFae2828_2379   | Type IV pilus biogenesis protein PilO                                                                      |
| Enterococcus italicus        | VBIEntIta172006_0220 | ABC-type multidrug transport system 2C permease component                                                  |
| Enterococcus italicus        | VBIEntIta172006_0356 | ABC-type multidrug transport system 2C permease component                                                  |
| Enterococcus italicus        | VBIEntIta172006_2036 | CipB protein                                                                                               |
| Enterococcus italicus        | VBIEntIta172006_2176 | Manganese ABC transporter 2C ATP-binding protein SitB                                                      |
| Enterococcus italicus        | VBIEntIta172006_0465 | MotA TolQ ExbB proton channel family protein                                                               |
| Enterococcus italicus        | VBIEntIta172006_1653 | Serine protease precursor MucD AlgY associated with sigma factor RpoE                                      |
| Enterococcus italicus        | VBIEntIta172006_1025 | UDP-N-acetylglucosamine 4 2C6-dehydratase EC 4.2.1.-                                                       |
| Enterococcus saccharolyticus | VBIEntSac158325_1701 | ATP synthase alpha chain EC 3.6.3.14                                                                       |
| Enterococcus saccharolyticus | VBIEntSac158325_0146 | Manganese ABC transporter 2C periplasmic-binding protein SitA                                              |
| Enterococcus saccharolyticus | VBIEntSac158325_0270 | NADH-ubiquinone oxidoreductase chain G EC 1.6.5.3                                                          |
| Enterococcus saccharolyticus | VBIEntSac158325_0707 | probable ABC transport ATP-binding protein NMA0485                                                         |
| Enterococcus saccharolyticus | VBIEntSac158325_1192 | RNA polymerase sigma factor RpoH                                                                           |
| Enterococcus saccharolyticus | VBIEntSac158325_0995 | Type IV fimbrial assembly 2C ATPase PilB                                                                   |
| Eubacterium limosum          | VBIEubLim172772_3577 | Choline kinase EC 2.7.1.32                                                                                 |
| Eubacterium limosum          | VBIEubLim172772_3203 | Enolase EC 4.2.1.11                                                                                        |
| Eubacterium limosum          | VBIEubLim172772_3070 | L-proline glycine betaine ABC transport system permease protein ProV TC 3.A.1.12.1                         |
| Eubacterium limosum          | VBIEubLim172772_3379 | Nitrate nitrite transporter                                                                                |
| Eubacterium limosum          | VBIEubLim172772_0621 | Respiratory nitrate reductase alpha chain EC 1.7.99.4                                                      |
| Eubacterium limosum          | VBIEubLim172772_1377 | Respiratory nitrate reductase beta chain EC 1.7.99.4                                                       |
| Eubacterium saburreum        | VBIEubSab170007_2805 | 3-oxoacyl-acyl-carrier-protein synthase 2C KASI EC 2.3.1.41                                                |
| Eubacterium saburreum        | VBIEubSab170007_1151 | Choline permease LicB                                                                                      |
| Eubacterium saburreum        | VBIEubSab170007_1603 | Phosphoglucosamine mutase EC 5.4.2.10                                                                      |
| Eubacterium saphenum         | VBIEubSap96619_0497  | Glutamyl-tRNA reductase EC 1.2.1.70                                                                        |
| Eubacterium saphenum         | VBIEubSap96619_0583  | Macrolide export ATP-binding permease protein MacB EC 3.6.3.-                                              |
| Eubacterium saphenum         | VBIEubSap96619_0747  | Manganese superoxide dismutase EC 1.15.1.1                                                                 |
| Eubacterium saphenum         | VBIEubSap96619_0432  | Phosphatidate cytidyltransferase EC 2.7.7.41                                                               |
| Eubacterium saphenum         | VBIEubSap96619_0750  | Type IV fimbrial biogenesis protein PilY1                                                                  |
| Eubacterium yurii            | VBIEubYur165861_0975 | ABC transporter 2C ATP-binding protein                                                                     |
| Eubacterium yurii            | VBIEubYur165861_1988 | Alcohol dehydrogenase EC 1.1.1.1 3B Acetaldehyde dehydrogenase EC 1.2.1.10                                 |
| Eubacterium yurii            | VBIEubYur165861_1281 | Beta-1 2C4-N-acetylgalactosaminyltransferase EC 2.4.1.-                                                    |
| Eubacterium yurii            | VBIEubYur165861_0618 | Copper-sensing two-component system response regulator CpxR                                                |
| Eubacterium yurii            | VBIEubYur165861_0985 | FIG138576 3-oxoacyl-ACP synthase EC 2.3.1.41                                                               |
| Eubacterium yurii            | VBIEubYur165861_1904 | Multiple sugar ABC transporter 2C ATP-binding protein                                                      |
| Eubacterium yurii            | VBIEubYur165861_1368 | NAD-dependent glyceraldehyde-3-phosphate dehydrogenase EC 1.2.1.12                                         |
| Eubacterium yurii            | VBIEubYur165861_1842 | Periplasmic hemin-binding protein                                                                          |
| Eubacterium yurii            | VBIEubYur165861_0223 | Porphobilinogen synthase EC 4.2.1.24                                                                       |
| Eubacterium yurii            | VBIEubYur165861_1284 | Putrescine transport ATP-binding protein PotA TC 3.A.1.11.1                                                |
| Filifactor aloclis           | VBIFilAlo43218_1298  | dTDP-glucose 4 2C6-dehydratase EC 4.2.1.46                                                                 |
| Filifactor aloclis           | VBIFilAlo43218_1254  | Glucose-1-phosphate thymidyltransferase EC 2.7.7.24                                                        |
| Filifactor aloclis           | VBIFilAlo43218_0881  | Lipid carrier UDP-N-acetylgalactosaminyltransferase Alpha-1 2C3-N-acetylgalactosamine transferase PglA     |
| Filifactor aloclis           | VBIFilAlo43218_1666  | Manganese ABC transporter 2C ATP-binding protein SitB                                                      |
| Filifactor aloclis           | VBIFilAlo43218_0742  | Respiratory nitrate reductase gamma chain EC 1.7.99.4                                                      |
| Filifactor aloclis           | VBIFilAlo43218_0763  | Signal transduction histidine kinase CheA EC 2.7.3.-                                                       |
| Fingoldia magna              | VBIFinMag33027_0152  | ABC transporter 2C ATP-binding permease protein                                                            |
| Fingoldia magna              | VBIFinMag136925_1563 | ABC transporter multidrug efflux pump 2C fused ATP-binding domains                                         |
| Fingoldia magna              | VBIFinMag136925_0548 | ABC transporter multidrug efflux pump 2C fused ATP-binding domains                                         |
| Fingoldia magna              | VBIFinMag167610_1747 | Acetylornithine aminotransferase EC 2.6.1.11 N-succinyl-L 2CL-diaminopimelate aminotransferase EC 2.6.1.17 |
| Fingoldia magna              | VBIFinMag33027_0588  | FIG00633188 hypothetical protein                                                                           |
| Fingoldia magna              | VBIFinMag33027_1416  | FIG00633188 hypothetical protein                                                                           |
| Fingoldia magna              | VBIFinMag33027_1181  | FIG00633188 hypothetical protein                                                                           |
| Fingoldia magna              | VBIFinMag33027_0696  | FIG00633188 hypothetical protein                                                                           |
| Fingoldia magna              | VBIFinMag33027_1780  | Glucose-1-phosphate thymidyltransferase EC 2.7.7.24                                                        |
| Fingoldia magna              | VBIFinMag33027_0433  | Hyaluronate lyase precursor EC 4.2.2.1                                                                     |
| Fingoldia magna              | VBIFinMag33027_0229  | hypothetical protein                                                                                       |
| Fingoldia magna              | VBIFinMag167610_1860 | Ornithine carbamoyltransferase EC 2.1.3.3                                                                  |
| Fingoldia magna              | VBIFinMag167610_0041 | Ribose ABC transport system 2C ATP-binding protein RbsA TC 3.A.1.2.1                                       |
| Fingoldia magna              | VBIFinMag136925_1613 | YjbH outer membrane lipoprotein                                                                            |
| Fusobacterium gonidiaformans | VBIFusGon64844_0172  | Lipopolysaccharide biosynthesis protein                                                                    |
| Fusobacterium gonidiaformans | VBIFusGon64844_0992  | regulatory protein 2C LuxRRresponse regulator receiver                                                     |
| Fusobacterium gonidiaformans | VBIFusGon64844_0109  | rhamnose-containing polysaccharide translocation permease                                                  |
| Fusobacterium necrophorum    | VBIFusNec223292_0997 | Cation transport ATPase                                                                                    |
| Fusobacterium necrophorum    | VBIFusNec223292_1215 | dTDP-glucose 4 2C6-dehydratase EC 4.2.1.46                                                                 |
| Fusobacterium nucleatum      | VBIFusNuc247698_0567 | ABC transporter 2C ATP-binding permease protein                                                            |
| Fusobacterium nucleatum      | VBIFusNuc129935_1252 | sensor histidine kinase                                                                                    |

Table S8

|                                  |                       |                                                                                                             |
|----------------------------------|-----------------------|-------------------------------------------------------------------------------------------------------------|
| Fusobacterium periodonticum      | VBIFusPer130431_2357  | Alkyl hydroperoxide reductase protein C EC 1.6.4.-                                                          |
| Fusobacterium periodonticum      | VBIFusPer130431_0073  | Oligopeptide transport ATP-binding protein OppD TC 3.A.1.5.1                                                |
| Fusobacterium sp. oral taxon 370 | VBIFusSp164945_1454   | RNA polymerase sigma factor RpoD                                                                            |
| Fusobacterium sp. oral taxon 370 | VBIFusSp164945_1240   | Translation elongation factor Tu                                                                            |
| Gardnerella vaginalis            | VBIGarVag4823_0753    | 3-oxoacyl-acyl-carrier protein reductase EC 1.1.1.100                                                       |
| Gardnerella vaginalis            | VBIGarVag136958_0321  | ABC transporter 2C ATP-binding permease protein                                                             |
| Gardnerella vaginalis            | VBIGarVag136958_0603  | Alpha-1 2C4-N-acetylgalactosamine transferase PglJ EC 2.4.1.-                                               |
| Gardnerella vaginalis            | VBIGarVag39333_0713   | ATP-dependent Clp protease 2C ATP-binding subunit ClpC Negative regulator of genetic competence clcC mecB   |
| Gardnerella vaginalis            | VBIGarVag136958_0633  | ATPase component of general energizing module of ECF transporters                                           |
| Gardnerella vaginalis            | VBIGarVag39333_0829   | Candidate zinc-binding lipoprotein ZinT                                                                     |
| Gardnerella vaginalis            | VBIGarVag4823_0546    | COG2274 ABC-type bacteriocin lantibiotic exporters 2C contain an N-terminal double-glycine peptidase domain |
| Gardnerella vaginalis            | VBIGarVag136958_0620  | Ferric iron ABC transporter 2C ATP-binding protein                                                          |
| Gardnerella vaginalis            | VBIGarVag4823_0384    | Ferrous iron transport protein B                                                                            |
| Gardnerella vaginalis            | VBIGarVag39333_0949   | FIG00632052 hypothetical protein                                                                            |
| Gardnerella vaginalis            | VBIGarVag39333_0992   | FIG00632052 hypothetical protein                                                                            |
| Gardnerella vaginalis            | VBIGarVag136958_0819  | FIG00633188 hypothetical protein                                                                            |
| Gardnerella vaginalis            | VBIGarVag136958_0949  | FIG00633188 hypothetical protein                                                                            |
| Gardnerella vaginalis            | VBIGarVag136958_0637  | FIG00633188 hypothetical protein                                                                            |
| Gardnerella vaginalis            | VBIGarVag39333_0003   | FIG00633188 hypothetical protein                                                                            |
| Gardnerella vaginalis            | VBIGarVag39333_0590   | FtsK SpoIIIE family protein 2C putative secretion system component EssC YukA                                |
| Gardnerella vaginalis            | VBIGarVag39333_0427   | Glucose-1-phosphate thymidyltransferase EC 2.7.7.24                                                         |
| Gardnerella vaginalis            | VBIGarVag39333_0833   | Histidine kinase of the competence regulon ComD                                                             |
| Gardnerella vaginalis            | VBIGarVag4823_0723    | Late competence protein ComGA 2C access of DNA to ComEA                                                     |
| Gardnerella vaginalis            | VBIGarVag39333_1026   | Lead 2C cadmium 2C zinc and mercury transporting ATPase EC 3.6.3.3 EC 3.6.3.5                               |
| Gardnerella vaginalis            | VBIGarVag4823_0928    | Lipid A export ATP-binding permease protein MsbA EC 3.6.3.25                                                |
| Gardnerella vaginalis            | VBIGarVag4823_1096    | Lipopolysaccharide biosynthesis protein WzxC                                                                |
| Gardnerella vaginalis            | VBIGarVag39333_0519   | Membrane protein involved in the export of O-antigen 2C teichoic acid lipoteichoic acids                    |
| Gardnerella vaginalis            | VBIGarVag39333_0652   | Membrane-associated zinc metalloprotease                                                                    |
| Gardnerella vaginalis            | VBIGarVag4823_0272    | MurB family protein                                                                                         |
| Gardnerella vaginalis            | VBIGarVag136958_0084  | Ornithine carbamoyltransferase EC 2.1.3.3                                                                   |
| Gardnerella vaginalis            | VBIGarVag4823_1190    | Putative ABC transporter ATP-binding protein                                                                |
| Gardnerella vaginalis            | VBIGarVag136958_0135  | Teichoic acid biosynthesis protein                                                                          |
| Gardnerella vaginalis            | VBIGarVag4823_0927    | Tetraacyldisaccharide 4'-kinase EC 2.7.1.130                                                                |
| Gardnerella vaginalis            | VBIGarVag4823_0239    | Translation elongation factor Tu                                                                            |
| Gemella haemolysans              | VBIGemHae124407_0467  | CFA I fimbrial auxiliary subunit                                                                            |
| Gemella haemolysans              | VBIGemHae124407_0510  | Multidrug resistance ABC transporter ATP-binding and permease protein                                       |
| Gemella haemolysans              | VBIGemHae122965_0303  | Putative ABC transporter ATP-binding protein                                                                |
| Gemella haemolysans              | VBIGemHae122965_0849  | Putative ATP-binding component of a transport system                                                        |
| Gemella haemolysans              | VBIGemHae124407_1294  | Translation elongation factor Tu                                                                            |
| Gemella sanguinis                | VBIGemSan95479_1224   | ABC transporter 2C ATP-binding permease protein                                                             |
| Gemella sanguinis                | VBIGemSan95479_0533   | ABC transporter ATP-binding protein                                                                         |
| Gemella sanguinis                | VBIGemSan95479_0433   | Alcohol dehydrogenase EC 1.1.1.1 3B Acetaldehyde dehydrogenase EC 1.2.1.10                                  |
| Gemella sanguinis                | VBIGemSan95479_1281   | ATP synthase beta chain EC 3.6.3.14                                                                         |
| Gemella sanguinis                | VBIGemSan95479_0042   | ATP-dependent Clp protease 2C ATP-binding subunit ClpC Negative regulator of genetic competence clcC mecB   |
| Gemella sanguinis                | VBIGemSan95479_0862   | ATPase component of general energizing module of ECF transporters                                           |
| Gemella sanguinis                | VBIGemSan95479_0043   | Cell envelope-associated transcriptional attenuator LytR-CpsA-Prs 2C subfamily F2 as in PMID19099556        |
| Gemella sanguinis                | VBIGemSan95479_0111   | Heat shock protein 60 family chaperone GroEL                                                                |
| Gemella sanguinis                | VBIGemSan95479_1015   | Lipid A export ATP-binding permease protein MsbA                                                            |
| Gemella sanguinis                | VBIGemSan95479_1463   | NAD-dependent glyceraldehyde-3-phosphate dehydrogenase EC 1.2.1.12                                          |
| Gemella sanguinis                | VBIGemSan95479_1228   | UTP--glucose-1-phosphate uridylyltransferase EC 2.7.7.9                                                     |
| Gemella sanguinis                | VBIGemSan95479_0524   | V-type ATP synthase subunit B EC 3.6.3.14                                                                   |
| Granulicatella adiacens          | VBIGraAdi114642_0346  | ABC-type multidrug protein lipid transport system 2C ATPase component                                       |
| Granulicatella adiacens          | VBIGraAdi114642_1411  | Enolase EC 4.2.1.11                                                                                         |
| Granulicatella adiacens          | VBIGraAdi114642_0980  | Enolase EC 4.2.1.11                                                                                         |
| Granulicatella adiacens          | VBIGraAdi114642_1376  | Fibronectin fibrinogen-binding protein                                                                      |
| Granulicatella adiacens          | VBIGraAdi114642_1399  | NAD-dependent glyceraldehyde-3-phosphate dehydrogenase EC 1.2.1.12                                          |
| Granulicatella adiacens          | VBIGraAdi114642_1498  | Oligopeptide ABC transporter 2C periplasmic oligopeptide-binding protein OppA TC 3.A.1.5.1                  |
| Granulicatella adiacens          | VBIGraAdi114642_0674  | Protein export cytoplasm protein SecA ATPase RNA helicase TC 3.A.5.1.1                                      |
| Granulicatella adiacens          | VBIGraAdi114642_0314  | Protein serine threonine phosphatase PrpC 2C regulation of stationary phase                                 |
| Granulicatella adiacens          | VBIGraAdi114642_0974  | Teichoic acid export ATP-binding protein TagH EC 3.6.3.40                                                   |
| Granulicatella adiacens          | VBIGraAdi114642_1285  | Teichoic acid export ATP-binding protein TagH EC 3.6.3.40                                                   |
| Granulicatella adiacens          | VBIGraAdi114642_1112  | Translation elongation factor Tu                                                                            |
| Granulicatella adiacens          | VBIGraAdi114642_1205  | Translation elongation factor Tu                                                                            |
| Granulicatella adiacens          | VBIGraAdi114642_0074  | Vancomycin response regulator VanR                                                                          |
| Granulicatella elegans           | VBIGraEle24208_1107   | Alkyl hydroperoxide reductase protein C EC 1.6.4.-                                                          |
| Granulicatella elegans           | VBIGraEle24208_0251   | ClpB protein                                                                                                |
| Haemophilus aegyptius            | VBIIHaeAeg171656_1467 | Alkyl hydroperoxide reductase subunit C-like protein                                                        |
| Haemophilus aegyptius            | VBIIHaeAeg171656_0798 | ClpB protein                                                                                                |
| Haemophilus aegyptius            | VBIIHaeAeg171656_0651 | Enolase EC 4.2.1.11                                                                                         |
| Haemophilus aegyptius            | VBIIHaeAeg171656_1970 | Ferrous iron transport protein B                                                                            |
| Haemophilus aegyptius            | VBIIHaeAeg171656_1899 | FIG00648460 hypothetical protein                                                                            |
| Haemophilus aegyptius            | VBIIHaeAeg171656_1840 | hypothetical protein                                                                                        |
| Haemophilus aegyptius            | VBIIHaeAeg171656_0734 | hypothetical protein                                                                                        |
| Haemophilus aegyptius            | VBIIHaeAeg171656_0464 | NAD-dependent glyceraldehyde-3-phosphate dehydrogenase EC 1.2.1.12                                          |
| Haemophilus aegyptius            | VBIIHaeAeg171656_1478 | Oligopeptide ABC transporter 2C periplasmic oligopeptide-binding protein OppA TC 3.A.1.5.1                  |
| Haemophilus aegyptius            | VBIIHaeAeg171656_0227 | Protein export cytoplasm protein SecA ATPase RNA helicase TC 3.A.5.1.1                                      |
| Haemophilus aegyptius            | VBIIHaeAeg171656_1894 | Translation elongation factor Tu                                                                            |
| Haemophilus aegyptius            | VBIIHaeAeg171656_0705 | Type IV fimbrial assembly protein PilC                                                                      |
| Haemophilus aegyptius            | VBIIHaeAeg171656_1347 | V-type ATP synthase subunit A EC 3.6.3.14                                                                   |

Table S8

|                            |                      |                                                                                                      |
|----------------------------|----------------------|------------------------------------------------------------------------------------------------------|
| Haemophilus ducreyi        | VBIHaeDuc133973_0563 | DNA polymerase III alpha subunit EC 2.7.7.7                                                          |
| Haemophilus ducreyi        | VBIHaeDuc133973_0734 | DNA polymerase III alpha subunit EC 2.7.7.7                                                          |
| Haemophilus ducreyi        | VBIHaeDuc133973_0541 | Glutamine synthetase type III 2C GlnN EC 6.3.1.2                                                     |
| Haemophilus ducreyi        | VBIHaeDuc133973_1258 | hypothetical protein                                                                                 |
| Haemophilus ducreyi        | VBIHaeDuc133973_1532 | hypothetical protein                                                                                 |
| Haemophilus ducreyi        | VBIHaeDuc133973_1087 | hypothetical protein                                                                                 |
| Haemophilus ducreyi        | VBIHaeDuc133973_0008 | hypothetical protein                                                                                 |
| Haemophilus ducreyi        | VBIHaeDuc133973_1624 | hypothetical protein                                                                                 |
| Haemophilus ducreyi        | VBIHaeDuc133973_0010 | Lysozyme M1 1 2C4-beta-N-acetylmuramidase                                                            |
| Haemophilus ducreyi        | VBIHaeDuc133973_0227 | Translation elongation factor Tu                                                                     |
| Haemophilus haemolyticus   | VBIHaeHae200538_1772 | 3-oxoacyl-acyl-carrier-protein synthase 2C KASII EC 2.3.1.41                                         |
| Haemophilus haemolyticus   | VBIHaeHae200538_1718 | ABC transporter 2C ATP-binding protein permease protein                                              |
| Haemophilus haemolyticus   | VBIHaeHae200538_0590 | Alkyl hydroperoxide reductase protein C EC 1.6.4.-                                                   |
| Haemophilus haemolyticus   | VBIHaeHae200538_1952 | ATP synthase alpha chain EC 3.6.3.14                                                                 |
| Haemophilus haemolyticus   | VBIHaeHae200538_0125 | ATP synthase beta chain EC 3.6.3.14                                                                  |
| Haemophilus haemolyticus   | VBIHaeHae195991_0284 | Cell wall-binding protein                                                                            |
| Haemophilus haemolyticus   | VBIHaeHae200538_1852 | ClpB protein                                                                                         |
| Haemophilus haemolyticus   | VBIHaeHae195991_2474 | Ferrous iron transport protein B                                                                     |
| Haemophilus haemolyticus   | VBIHaeHae195991_1073 | Ferrous iron transport protein B                                                                     |
| Haemophilus haemolyticus   | VBIHaeHae195991_1823 | Ferrous iron transport protein B                                                                     |
| Haemophilus haemolyticus   | VBIHaeHae200538_1693 | Heat shock protein 60 family chaperone GroEL                                                         |
| Haemophilus haemolyticus   | VBIHaeHae195991_0224 | hypothetical protein                                                                                 |
| Haemophilus haemolyticus   | VBIHaeHae200538_0510 | NAD-dependent glyceraldehyde-3-phosphate dehydrogenase EC 1.2.1.12                                   |
| Haemophilus haemolyticus   | VBIHaeHae200538_0892 | NAD-dependent glyceraldehyde-3-phosphate dehydrogenase EC 1.2.1.12                                   |
| Haemophilus haemolyticus   | VBIHaeHae200538_1658 | NAD-dependent glyceraldehyde-3-phosphate dehydrogenase EC 1.2.1.12                                   |
| Haemophilus haemolyticus   | VBIHaeHae195991_2153 | NAD-dependent glyceraldehyde-3-phosphate dehydrogenase EC 1.2.1.12                                   |
| Haemophilus haemolyticus   | VBIHaeHae195991_1950 | Oligopeptide transport ATP-binding protein OppD TC 3.A.1.5.1                                         |
| Haemophilus haemolyticus   | VBIHaeHae200538_0689 | Putative periplasmic binding protein                                                                 |
| Haemophilus haemolyticus   | VBIHaeHae195991_0435 | Translation elongation factor Tu                                                                     |
| Haemophilus parainfluenzae | VBIHaePar172879_1055 | ABC transporter 2C ATP-binding protein                                                               |
| Haemophilus parainfluenzae | VBIHaePar172879_1213 | ABC transporter ATP-binding membrane spanning protein - multidrug resistance                         |
| Haemophilus parainfluenzae | VBIHaePar172879_1722 | ABC transporter ATP-binding protein                                                                  |
| Haemophilus parainfluenzae | VBIHaePar172879_0001 | ABC-type nitrate sulfonate bicarbonate transport system 2C ATPase component                          |
| Haemophilus parainfluenzae | VBIHaePar172879_0402 | ABC-type nitrate sulfonate bicarbonate transport system 2C ATPase component                          |
| Haemophilus parainfluenzae | VBIHaePar172879_1617 | Acetylmethionine aminotransferase EC 2.6.1.11                                                        |
| Haemophilus parainfluenzae | VBIHaePar172879_1584 | Aerobic respiration control protein arcA                                                             |
| Haemophilus parainfluenzae | VBIHaePar172879_0987 | Alcohol dehydrogenase EC 1.1.1.1 3B Acetaldehyde dehydrogenase EC 1.2.1.10                           |
| Haemophilus parainfluenzae | VBIHaePar172879_0213 | Alkyl hydroperoxide reductase protein C EC 1.6.4.-                                                   |
| Haemophilus parainfluenzae | VBIHaePar172879_1478 | Arginine ABC transporter 2C permease protein ArtQ                                                    |
| Haemophilus parainfluenzae | VBIHaePar172879_1740 | ATP synthase alpha chain EC 3.6.3.14                                                                 |
| Haemophilus parainfluenzae | VBIHaePar172879_1560 | ATP synthase alpha chain EC 3.6.3.14                                                                 |
| Haemophilus parainfluenzae | VBIHaePar172879_1970 | ATP synthase beta chain EC 3.6.3.14                                                                  |
| Haemophilus parainfluenzae | VBIHaePar172879_0162 | ATP synthase beta chain EC 3.6.3.14                                                                  |
| Haemophilus parainfluenzae | VBIHaePar172879_1581 | ATP synthase beta chain EC 3.6.3.14                                                                  |
| Haemophilus parainfluenzae | VBIHaePar172879_0485 | ATPase component of general energizing module of ECF transporters                                    |
| Haemophilus parainfluenzae | VBIHaePar172879_0214 | ATPase component of general energizing module of ECF transporters                                    |
| Haemophilus parainfluenzae | VBIHaePar172879_0811 | C5a peptidase EC 3.4.21.-                                                                            |
| Haemophilus parainfluenzae | VBIHaePar172879_1295 | capsular polysaccharide biosynthesis protein                                                         |
| Haemophilus parainfluenzae | VBIHaePar172879_0452 | Cell division protein FtsK                                                                           |
| Haemophilus parainfluenzae | VBIHaePar172879_0216 | Cell division protein FtsK                                                                           |
| Haemophilus parainfluenzae | VBIHaePar172879_1729 | Cell envelope opacity-associated protein A                                                           |
| Haemophilus parainfluenzae | VBIHaePar172879_1279 | Cell envelope-associated transcriptional attenuator LytR-CpsA-Psr 2C subfamily F2 as in PMID19099556 |
| Haemophilus parainfluenzae | VBIHaePar172879_1104 | Choline binding protein A                                                                            |
| Haemophilus parainfluenzae | VBIHaePar172879_1102 | Choline binding protein A                                                                            |
| Haemophilus parainfluenzae | VBIHaePar172879_1559 | Choline permease LicB                                                                                |
| Haemophilus parainfluenzae | VBIHaePar172879_1298 | ClpB protein                                                                                         |
| Haemophilus parainfluenzae | VBIHaePar172879_0697 | ClpB protein                                                                                         |
| Haemophilus parainfluenzae | VBIHaePar172879_1751 | Cytochrome c heme lyase subunit CcmF                                                                 |
| Haemophilus parainfluenzae | VBIHaePar172879_0687 | D-alanyl transfer protein DltB                                                                       |
| Haemophilus parainfluenzae | VBIHaePar172879_0280 | Daunorubicin resistance ATP-binding protein drrA                                                     |
| Haemophilus parainfluenzae | VBIHaePar172879_1859 | dTDP-glucose 4 2C6-dehydratase EC 4.2.1.46                                                           |
| Haemophilus parainfluenzae | VBIHaePar172879_1721 | Enolase EC 4.2.1.11                                                                                  |
| Haemophilus parainfluenzae | VBIHaePar172879_1345 | Enolase EC 4.2.1.11                                                                                  |
| Haemophilus parainfluenzae | VBIHaePar172879_0085 | FIG00672414 hypothetical protein                                                                     |
| Haemophilus parainfluenzae | VBIHaePar172879_0829 | FIG01114802 hypothetical protein                                                                     |
| Haemophilus parainfluenzae | VBIHaePar172879_1589 | Glucose-1-phosphate thymidyltransferase EC 2.7.7.24                                                  |
| Haemophilus parainfluenzae | VBIHaePar172879_0794 | GTP pyrophosphokinase EC 2.7.6.5 2C pppGpp synthetase I                                              |
| Haemophilus parainfluenzae | VBIHaePar172879_0019 | GTP pyrophosphokinase EC 2.7.6.5 2C pppGpp synthetase I                                              |
| Haemophilus parainfluenzae | VBIHaePar172879_1296 | Heat shock protein 60 family chaperone GroEL                                                         |
| Haemophilus parainfluenzae | VBIHaePar172879_0028 | Heat shock protein 60 family chaperone GroEL                                                         |
| Haemophilus parainfluenzae | VBIHaePar172879_1125 | Heme efflux system ATPase HrtA                                                                       |
| Haemophilus parainfluenzae | VBIHaePar172879_0823 | hypothetical protein                                                                                 |
| Haemophilus parainfluenzae | VBIHaePar172879_0990 | hypothetical protein                                                                                 |
| Haemophilus parainfluenzae | VBIHaePar172879_1434 | Large exoproteins involved in heme utilization or adhesion                                           |
| Haemophilus parainfluenzae | VBIHaePar172879_1138 | Lipid A export ATP-binding permease protein MsbA                                                     |
| Haemophilus parainfluenzae | VBIHaePar172879_1156 | Lipid A export ATP-binding permease protein MsbA                                                     |
| Haemophilus parainfluenzae | VBIHaePar172879_1933 | Macrolide export ATP-binding permease protein MacB EC 3.6.3.-                                        |
| Haemophilus parainfluenzae | VBIHaePar172879_0298 | Magnesium and cobalt efflux protein CorC                                                             |
| Haemophilus parainfluenzae | VBIHaePar172879_0215 | Magnesium and cobalt efflux protein CorC                                                             |

Table S8

|                                |                       |                                                                                             |
|--------------------------------|-----------------------|---------------------------------------------------------------------------------------------|
| Haemophilus parainfluenzae     | VBIIHaePar172879_0296 | Manganese ABC transporter 2C inner membrane permease protein SitD                           |
| Haemophilus parainfluenzae     | VBIIHaePar172879_1216 | Methionine ABC transporter ATP-binding protein                                              |
| Haemophilus parainfluenzae     | VBIIHaePar172879_0956 | Mg2+ transport ATPase 2C P-type EC 3.6.3.2                                                  |
| Haemophilus parainfluenzae     | VBIIHaePar172879_1297 | Nitrate nitrite response regulator protein                                                  |
| Haemophilus parainfluenzae     | VBIIHaePar172879_1494 | Oligopeptide ABC transporter 2C periplasmic oligopeptide-binding protein OppA TC 3.A.1.5.1  |
| Haemophilus parainfluenzae     | VBIIHaePar172879_0294 | Oligopeptide transport ATP-binding protein OppD TC 3.A.1.5.1                                |
| Haemophilus parainfluenzae     | VBIIHaePar172879_1209 | Oligopeptide transport ATP-binding protein OppD TC 3.A.1.5.1                                |
| Haemophilus parainfluenzae     | VBIIHaePar172879_1518 | Oligopeptide transport ATP-binding protein OppF TC 3.A.1.5.1                                |
| Haemophilus parainfluenzae     | VBIIHaePar172879_1724 | Outer membrane protein assembly factor YaeT precursor                                       |
| Haemophilus parainfluenzae     | VBIIHaePar172879_1953 | Outer membrane protein assembly factor YaeT precursor                                       |
| Haemophilus parainfluenzae     | VBIIHaePar172879_1346 | Outer membrane receptor for lactoferrin or transferrin 2C lipoprotein B                     |
| Haemophilus parainfluenzae     | VBIIHaePar172879_1430 | probable integral membrane protein NMA0408                                                  |
| Haemophilus parainfluenzae     | VBIIHaePar172879_0002 | Protein export cytoplasm protein SecA ATPase RNA helicase TC 3.A.5.1.1                      |
| Haemophilus parainfluenzae     | VBIIHaePar172879_1344 | Protein export cytoplasm protein SecA ATPase RNA helicase TC 3.A.5.1.1                      |
| Haemophilus parainfluenzae     | VBIIHaePar172879_1680 | putative ABC transporter 2C ATP-binding protein                                             |
| Haemophilus parainfluenzae     | VBIIHaePar172879_1651 | Putative large exoprotein involved in heme utilization or adhesion of ShlA HecA FhaA family |
| Haemophilus parainfluenzae     | VBIIHaePar172879_0522 | Putative secretion accessory protein EsaA YueB                                              |
| Haemophilus parainfluenzae     | VBIIHaePar172879_0521 | RNA binding methyltransferase FtsJ like                                                     |
| Haemophilus parainfluenzae     | VBIIHaePar172879_0830 | RNA binding methyltransferase FtsJ like                                                     |
| Haemophilus parainfluenzae     | VBIIHaePar172879_0455 | Serine threonine protein kinase                                                             |
| Haemophilus parainfluenzae     | VBIIHaePar172879_0456 | Serine threonine protein kinase PrkC 2C regulator of stationary phase                       |
| Haemophilus parainfluenzae     | VBIIHaePar172879_1860 | Superoxide dismutase Cu-Zn precursor EC 1.15.1.1                                            |
| Haemophilus parainfluenzae     | VBIIHaePar172879_1856 | Teichoic acid export ATP-binding protein TagH EC 3.6.3.40                                   |
| Haemophilus parainfluenzae     | VBIIHaePar172879_1392 | TETRATRICOPEPTIDE REPEAT FAMILY PROTEIN                                                     |
| Haemophilus parainfluenzae     | VBIIHaePar172879_1417 | TETRATRICOPEPTIDE REPEAT FAMILY PROTEIN                                                     |
| Haemophilus parainfluenzae     | VBIIHaePar172879_1356 | TETRATRICOPEPTIDE REPEAT FAMILY PROTEIN                                                     |
| Haemophilus parainfluenzae     | VBIIHaePar172879_1352 | TETRATRICOPEPTIDE REPEAT FAMILY PROTEIN                                                     |
| Haemophilus parainfluenzae     | VBIIHaePar172879_1956 | TonB-dependent receptor 3B Outer membrane receptor for ferrienterochelin and colicins       |
| Haemophilus parainfluenzae     | VBIIHaePar172879_1847 | Translation elongation factor Tu                                                            |
| Haemophilus parainfluenzae     | VBIIHaePar172879_1586 | Translation elongation factor Tu                                                            |
| Haemophilus parainfluenzae     | VBIIHaePar172879_1629 | Type II IV secretion system ATP hydrolase TadA VirB11 CpaF 2C TadA subfamily                |
| Haemophilus parainfluenzae     | VBIIHaePar172879_1697 | UDP-2 2C3-diacylglucosamine hydrolase EC 3.6.1.-                                            |
| Haemophilus parainfluenzae     | VBIIHaePar172879_0544 | UDP-N-acetylenolpyruvoylglucosamine reductase EC 1.1.1.158                                  |
| Haemophilus parainfluenzae     | VBIIHaePar172879_0281 | Undecaprenyl pyrophosphate synthetase EC 2.5.1.31                                           |
| Haemophilus parainfluenzae     | VBIIHaePar172879_0104 | Undecaprenyl-phosphate N-acetylglucosaminyl 1-phosphate transferase EC 2.7.8.-              |
| Haemophilus parainfluenzae     | VBIIHaePar172879_1817 | Urease alpha subunit EC 3.5.1.5                                                             |
| Haemophilus parainfluenzae     | VBIIHaePar172879_0837 | V-type ATP synthase subunit B EC 3.6.3.14                                                   |
| Haemophilus parainfluenzae     | VBIIHaePar172879_0833 | Xanthine dehydrogenase 2C molybdenum binding subunit EC 1.17.1.4                            |
| Haemophilus parainfluenzae     | VBIIHaePar172879_0526 | Zinc metalloprotease zmpB precursor EC 3.4.24.-                                             |
| Haemophilus sp. oral taxon 851 | VBIIHaeSp161369_1530  | 8-amino-7-oxononanoate synthase EC 2.3.1.47                                                 |
| Haemophilus sp. oral taxon 851 | VBIIHaeSp161369_1322  | ABC transporter ATP-binding protein                                                         |
| Haemophilus sp. oral taxon 851 | VBIIHaeSp161369_1143  | ABC transporter involved in cytochrome c biogenesis 2C ATPase component CcmA                |
| Haemophilus sp. oral taxon 851 | VBIIHaeSp161369_1491  | ABC-type cobalamin Fe3+-siderophores transport systems 2C ATPase components                 |
| Haemophilus sp. oral taxon 851 | VBIIHaeSp161369_1478  | ABC-type Fe3+-siderophore transport system 2C permease component                            |
| Haemophilus sp. oral taxon 851 | VBIIHaeSp161369_1519  | Adenosylmethionine-8-amino-7-oxononanoate aminotransferase EC 2.6.1.62                      |
| Haemophilus sp. oral taxon 851 | VBIIHaeSp161369_0452  | adhesion and penetration protein Hap                                                        |
| Haemophilus sp. oral taxon 851 | VBIIHaeSp161369_0104  | Anthranilate phosphoribosyltransferase EC 2.4.2.18                                          |
| Haemophilus sp. oral taxon 851 | VBIIHaeSp161369_1168  | Cytochrome c-type biogenesis protein CcmC 2C putative heme lyase for CcmE                   |
| Haemophilus sp. oral taxon 851 | VBIIHaeSp161369_1188  | Cytochrome c-type biogenesis protein CcmE 2C heme chaperone                                 |
| Haemophilus sp. oral taxon 851 | VBIIHaeSp161369_0168  | D-glycero-D-manno-heptose 1 2C7-bisphosphate phosphatase EC 3.1.1.-                         |
| Haemophilus sp. oral taxon 851 | VBIIHaeSp161369_1707  | FIG00497364 hypothetical protein                                                            |
| Haemophilus sp. oral taxon 851 | VBIIHaeSp161369_1638  | FIG00497364 hypothetical protein                                                            |
| Haemophilus sp. oral taxon 851 | VBIIHaeSp161369_1644  | FIG00497364 hypothetical protein                                                            |
| Haemophilus sp. oral taxon 851 | VBIIHaeSp161369_0117  | Glycerol-3-phosphate transporter                                                            |
| Haemophilus sp. oral taxon 851 | VBIIHaeSp161369_0718  | hypothetical protein                                                                        |
| Haemophilus sp. oral taxon 851 | VBIIHaeSp161369_0616  | hypothetical protein                                                                        |
| Haemophilus sp. oral taxon 851 | VBIIHaeSp161369_0669  | hypothetical protein                                                                        |
| Haemophilus sp. oral taxon 851 | VBIIHaeSp161369_0678  | hypothetical protein                                                                        |
| Haemophilus sp. oral taxon 851 | VBIIHaeSp161369_0747  | hypothetical protein                                                                        |
| Haemophilus sp. oral taxon 851 | VBIIHaeSp161369_0799  | hypothetical protein                                                                        |
| Haemophilus sp. oral taxon 851 | VBIIHaeSp161369_1534  | Lipoprotein releasing system ATP-binding protein LolD                                       |
| Haemophilus sp. oral taxon 851 | VBIIHaeSp161369_1142  | Manganese ABC transporter 2C inner membrane permease protein SitC                           |
| Haemophilus sp. oral taxon 851 | VBIIHaeSp161369_1016  | Manganese ABC transporter 2C inner membrane permease protein SitD                           |
| Haemophilus sp. oral taxon 851 | VBIIHaeSp161369_0341  | Methionine ABC transporter ATP-binding protein                                              |
| Haemophilus sp. oral taxon 851 | VBIIHaeSp161369_0359  | Oligopeptide transport ATP-binding protein OppD TC 3.A.1.5.1                                |
| Haemophilus sp. oral taxon 851 | VBIIHaeSp161369_1499  | Outer membrane lipoprotein LolB precursor                                                   |
| Haemophilus sp. oral taxon 851 | VBIIHaeSp161369_1615  | Peptide transport system ATP-binding protein SapF                                           |
| Haemophilus sp. oral taxon 851 | VBIIHaeSp161369_1272  | Phosphoribosylaminoimidazole-succinocarboxamide synthase EC 6.3.2.6                         |
| Haemophilus sp. oral taxon 851 | VBIIHaeSp161369_0487  | Porphobilinogen synthase EC 4.2.1.24                                                        |
| Haemophilus sp. oral taxon 851 | VBIIHaeSp161369_0133  | probable integral membrane protein NMA0408                                                  |
| Haemophilus sp. oral taxon 851 | VBIIHaeSp161369_0459  | probable integral membrane protein NMA0408                                                  |
| Haemophilus sp. oral taxon 851 | VBIIHaeSp161369_1008  | protein transport protein                                                                   |
| Haemophilus sp. oral taxon 851 | VBIIHaeSp161369_0805  | type 4 prepilin-like protein specific leader peptidase                                      |
| Haemophilus sp. oral taxon 851 | VBIIHaeSp161369_1004  | Type II secretory pathway 2C component PulF Type IV fimbrial assembly protein PilC          |
| Haemophilus sp. oral taxon 851 | VBIIHaeSp161369_1009  | Type IV pilin PilA                                                                          |
| Haemophilus sp. oral taxon 851 | VBIIHaeSp161369_0132  | Urease alpha subunit EC 3.5.1.5                                                             |
| Helicobacter pylori            | VBIIHelPyl144313_0894 | FIG00497364 hypothetical protein                                                            |
| Helicobacter pylori            | VBIIHelPyl144313_0840 | FIG00497364 hypothetical protein                                                            |
| Helicobacter pylori            | VBIIHelPyl144313_0260 | FIG00497364 hypothetical protein                                                            |

Table S8

|                        |                      |                                                                                                                      |
|------------------------|----------------------|----------------------------------------------------------------------------------------------------------------------|
| Helicobacter pylori    | VBHelPyl144313_0067  | FIG00497364 hypothetical protein                                                                                     |
| Helicobacter pylori    | VBHelPyl144313_0038  | FIG00497364 hypothetical protein                                                                                     |
| Helicobacter pylori    | VBHelPyl144313_1027  | Oligopeptide transport ATP-binding protein OppF TC 3.A.1.5.1                                                         |
| Helicobacter pylori    | VBHelPyl144313_1171  | Phosphoglucosamine mutase EC 5.4.2.10                                                                                |
| Johnsonella ignava     | VBJohnIgn140542_1172 | Undecaprenyl-phosphate N-acetylglucosaminyl 1-phosphate transferase EC 2.7.8.-                                       |
| Kingella denitrificans | VBKinDen171475_1124  | 2-Keto-3-deoxy-D-manno-octulosonate-8-phosphate synthase EC 2.5.1.55                                                 |
| Kingella denitrificans | VBKinDen171475_0453  | 3-deoxy-D-manno-octulosonic-acid transferase EC 2.-.-.-                                                              |
| Kingella denitrificans | VBKinDen171475_0196  | 3-deoxy-manno-octulosonate cytidyltransferase EC 2.7.7.38                                                            |
| Kingella denitrificans | VBKinDen171475_0417  | 3-isopropylmalate dehydratase small subunit EC 4.2.1.33                                                              |
| Kingella denitrificans | VBKinDen171475_1897  | 3-isopropylmalate dehydratase small subunit EC 4.2.1.33                                                              |
| Kingella denitrificans | VBKinDen171475_0413  | 3R-hydroxymyristoyl-acyl carrier protein dehydratase EC 4.2.1.-                                                      |
| Kingella denitrificans | VBKinDen171475_1112  | 8-amino-7-oxononanoate synthase EC 2.3.1.47                                                                          |
| Kingella denitrificans | VBKinDen171475_1265  | ABC transporter 2C ATP-binding protein                                                                               |
| Kingella denitrificans | VBKinDen171475_0032  | ABC transporter 2C ATP-binding subunit precursor                                                                     |
| Kingella denitrificans | VBKinDen171475_2222  | ABC-type polar amino acid transport system 2C ATPase component                                                       |
| Kingella denitrificans | VBKinDen171475_0236  | ABC-type polar amino acid transport system 2C ATPase component                                                       |
| Kingella denitrificans | VBKinDen171475_0400  | Acyl-acyl-carrier-protein--UDP-N- acetylglucosamine O-acyltransferase EC 2.3.1.129                                   |
| Kingella denitrificans | VBKinDen171475_1115  | Adenosylmethionine-8-amino-7-oxononanoate aminotransferase EC 2.6.1.62                                               |
| Kingella denitrificans | VBKinDen171475_0452  | ADP-heptose--lipooligosaccharide heptosyltransferase II EC 2.4.1.-                                                   |
| Kingella denitrificans | VBKinDen171475_0701  | ADP-heptose--lipooligosaccharide heptosyltransferase II EC 2.4.1.-                                                   |
| Kingella denitrificans | VBKinDen171475_0504  | Amino-acid ABC transporter ATP-binding protein                                                                       |
| Kingella denitrificans | VBKinDen171475_2128  | Amylovoran biosynthesis glycosyltransferase amsE EC 2.-.-.-                                                          |
| Kingella denitrificans | VBKinDen171475_0950  | Anthranilate phosphoribosyltransferase EC 2.4.2.18                                                                   |
| Kingella denitrificans | VBKinDen171475_2086  | Anthranilate synthase 2C aminase component EC 4.1.3.27                                                               |
| Kingella denitrificans | VBKinDen171475_0227  | Arginine ABC transporter 2C ATP-binding protein ArtP                                                                 |
| Kingella denitrificans | VBKinDen171475_0224  | Arginine ABC transporter 2C permease protein ArtQ                                                                    |
| Kingella denitrificans | VBKinDen171475_0680  | Aspartate racemase EC 5.1.1.13                                                                                       |
| Kingella denitrificans | VBKinDen171475_0786  | ATP synthase alpha chain EC 3.6.3.14                                                                                 |
| Kingella denitrificans | VBKinDen171475_2361  | ATP synthase alpha chain EC 3.6.3.14                                                                                 |
| Kingella denitrificans | VBKinDen171475_2327  | ATP synthase beta chain EC 3.6.3.14                                                                                  |
| Kingella denitrificans | VBKinDen171475_1768  | ATPase provides energy for both assembly of type IV secretion complex and secretion of T-DNA complex VirB11          |
| Kingella denitrificans | VBKinDen171475_1928  | Bacillosamine Legionaminic acid biosynthesis aminotransferase PglE 3B 4-keto-6-deoxy-N-Acetyl-D-hexosaminyl-Lipid c: |
| Kingella denitrificans | VBKinDen171475_0709  | Biofilm PGA synthesis N-glycosyltransferase PgaC EC 2.4.-.-                                                          |
| Kingella denitrificans | VBKinDen171475_1844  | CDP-6-deoxy-delta-3 2C4-glucoseen reductase-like                                                                     |
| Kingella denitrificans | VBKinDen171475_2198  | Cell division trigger factor EC 5.2.1.8                                                                              |
| Kingella denitrificans | VBKinDen171475_1280  | ClpB protein                                                                                                         |
| Kingella denitrificans | VBKinDen171475_0416  | Dca                                                                                                                  |
| Kingella denitrificans | VBKinDen171475_0941  | Dca                                                                                                                  |
| Kingella denitrificans | VBKinDen171475_0190  | Dipeptide transport ATP-binding protein DppF TC 3.A.1.5.2                                                            |
| Kingella denitrificans | VBKinDen171475_1548  | DNA transformation competency                                                                                        |
| Kingella denitrificans | VBKinDen171475_1237  | FepC protein                                                                                                         |
| Kingella denitrificans | VBKinDen171475_0759  | FepC protein                                                                                                         |
| Kingella denitrificans | VBKinDen171475_2089  | Ferric anguibactin-binding protein                                                                                   |
| Kingella denitrificans | VBKinDen171475_0650  | Ferric vulnibactin receptor VuuA                                                                                     |
| Kingella denitrificans | VBKinDen171475_0447  | Ferrochelatase 2C protoheme ferro-lyase EC 4.99.1.1                                                                  |
| Kingella denitrificans | VBKinDen171475_2260  | Ferrochelatase 2C protoheme ferro-lyase EC 4.99.1.1                                                                  |
| Kingella denitrificans | VBKinDen171475_0954  | FKBP-type peptidyl-prolyl cis-trans isomerase fkIB EC 5.2.1.8                                                        |
| Kingella denitrificans | VBKinDen171475_1590  | Flagellar hook protein FlgE                                                                                          |
| Kingella denitrificans | VBKinDen171475_0757  | Glutamine synthetase type I EC 6.3.1.2                                                                               |
| Kingella denitrificans | VBKinDen171475_1927  | Glutamine synthetase type I EC 6.3.1.2                                                                               |
| Kingella denitrificans | VBKinDen171475_1579  | Glutamine synthetase type I EC 6.3.1.2                                                                               |
| Kingella denitrificans | VBKinDen171475_0795  | Glycerol-3-phosphate transporter                                                                                     |
| Kingella denitrificans | VBKinDen171475_0316  | Glycerol-3-phosphate transporter                                                                                     |
| Kingella denitrificans | VBKinDen171475_1078  | glycosyl transferase                                                                                                 |
| Kingella denitrificans | VBKinDen171475_1702  | glycosyl transferase                                                                                                 |
| Kingella denitrificans | VBKinDen171475_2098  | GTP pyrophosphokinase EC 2.7.6.5 2C pppGpp synthetase I                                                              |
| Kingella denitrificans | VBKinDen171475_1231  | GTP pyrophosphokinase EC 2.7.6.5 2C pppGpp synthetase II                                                             |
| Kingella denitrificans | VBKinDen171475_1981  | Heat shock protein 60 family chaperone GroEL                                                                         |
| Kingella denitrificans | VBKinDen171475_0527  | Hemolysins and related proteins containing CBS domains                                                               |
| Kingella denitrificans | VBKinDen171475_0906  | Hemolysins and related proteins containing CBS domains                                                               |
| Kingella denitrificans | VBKinDen171475_0797  | Homolog of E. coli HemY protein                                                                                      |
| Kingella denitrificans | VBKinDen171475_0503  | Homolog of E. coli HemY protein                                                                                      |
| Kingella denitrificans | VBKinDen171475_0235  | Hydroxymethylpyrimidine ABC transporter 2C ATPase component                                                          |
| Kingella denitrificans | VBKinDen171475_1533  | hypothetical protein                                                                                                 |
| Kingella denitrificans | VBKinDen171475_2065  | hypothetical protein                                                                                                 |
| Kingella denitrificans | VBKinDen171475_0850  | hypothetical protein                                                                                                 |
| Kingella denitrificans | VBKinDen171475_0903  | hypothetical protein                                                                                                 |
| Kingella denitrificans | VBKinDen171475_2035  | hypothetical protein                                                                                                 |
| Kingella denitrificans | VBKinDen171475_1670  | Imidazole glycerol phosphate synthase amidotransferase subunit EC 2.4.2.-                                            |
| Kingella denitrificans | VBKinDen171475_1689  | Imidazole glycerol phosphate synthase cyclase subunit EC 4.1.3.-                                                     |
| Kingella denitrificans | VBKinDen171475_0639  | Inner membrane ABC-transporter YbtQ                                                                                  |
| Kingella denitrificans | VBKinDen171475_1767  | Inner membrane protein forms channel for type IV secretion of T-DNA complex VirB10                                   |
| Kingella denitrificans | VBKinDen171475_0034  | Iron (III) dicitrate transport ATP-binding protein FecE TC 3.A.1.14.1                                                |
| Kingella denitrificans | VBKinDen171475_0711  | Iron (III) dicitrate transport ATP-binding protein FecE TC 3.A.1.14.1                                                |
| Kingella denitrificans | VBKinDen171475_0720  | Iron (III) dicitrate transport system permease protein FecD TC 3.A.1.14.1                                            |
| Kingella denitrificans | VBKinDen171475_0043  | Iron (III) dicitrate transport system permease protein FecD TC 3.A.1.14.1                                            |
| Kingella denitrificans | VBKinDen171475_0358  | Iron compound ABC uptake transporter ATP-binding protein                                                             |
| Kingella denitrificans | VBKinDen171475_0373  | Iron compound ABC uptake transporter permease protein                                                                |
| Kingella denitrificans | VBKinDen171475_0336  | Iron compound ABC uptake transporter substrate-binding protein                                                       |

Table S8

|                        |                      |                                                                                                    |
|------------------------|----------------------|----------------------------------------------------------------------------------------------------|
| Kingella denitrificans | VBIKinDen171475_0949 | Large exoproteins involved in heme utilization or adhesion                                         |
| Kingella denitrificans | VBIKinDen171475_2005 | Leader peptidase Prepilin peptidase EC 3.4.23.43 N-methyltransferase EC 2.1.1.-                    |
| Kingella denitrificans | VBIKinDen171475_0936 | Lipid A biosynthesis KDO 2-lauroyl-lipid IVA acyltransferase EC 2.3.1.-                            |
| Kingella denitrificans | VBIKinDen171475_0201 | Lipid A export ATP-binding permease protein MsbA EC 3.6.3.25                                       |
| Kingella denitrificans | VBIKinDen171475_1202 | Lipid A export ATP-binding permease protein MsbA EC 3.6.3.25                                       |
| Kingella denitrificans | VBIKinDen171475_2197 | Lipid-A-disaccharide synthase EC 2.4.1.182                                                         |
| Kingella denitrificans | VBIKinDen171475_0381 | Lipid-A-disaccharide synthase EC 2.4.1.182                                                         |
| Kingella denitrificans | VBIKinDen171475_0474 | Lipopolysaccharide biosynthesis glycosyltransferase                                                |
| Kingella denitrificans | VBIKinDen171475_2264 | lipopolysaccharide biosynthesis protein                                                            |
| Kingella denitrificans | VBIKinDen171475_0837 | lipopolysaccharide biosynthesis protein                                                            |
| Kingella denitrificans | VBIKinDen171475_0181 | Lipopolysaccharide core biosynthesis glycosyltransferase WadA                                      |
| Kingella denitrificans | VBIKinDen171475_1232 | Lipopolysaccharide heptosyltransferase I EC 2.4.1.-                                                |
| Kingella denitrificans | VBIKinDen171475_0647 | lipoprotein inner membrane ABC-transporter                                                         |
| Kingella denitrificans | VBIKinDen171475_1100 | Lipoprotein releasing system ATP-binding protein LolD                                              |
| Kingella denitrificans | VBIKinDen171475_2285 | Long-chain-fatty-acid--CoA ligase EC 6.2.1.3                                                       |
| Kingella denitrificans | VBIKinDen171475_1143 | Manganese ABC transporter 2C inner membrane permease protein SitD                                  |
| Kingella denitrificans | VBIKinDen171475_2374 | Manganese superoxide dismutase EC 1.15.1.1                                                         |
| Kingella denitrificans | VBIKinDen171475_0120 | Membrane-bound lytic murein transglycosylase B precursor EC 3.2.1.-                                |
| Kingella denitrificans | VBIKinDen171475_0945 | Methionine ABC transporter ATP-binding protein                                                     |
| Kingella denitrificans | VBIKinDen171475_0676 | Methionyl-tRNA formyltransferase EC 2.1.2.9                                                        |
| Kingella denitrificans | VBIKinDen171475_2266 | MotA TolQ ExbB proton channel family protein                                                       |
| Kingella denitrificans | VBIKinDen171475_2293 | N-acetylneuraminate synthase EC 2.5.1.56                                                           |
| Kingella denitrificans | VBIKinDen171475_0497 | Nitrate nitrite response regulator protein                                                         |
| Kingella denitrificans | VBIKinDen171475_2466 | Nitrate nitrite transporter                                                                        |
| Kingella denitrificans | VBIKinDen171475_0751 | Nucleoside 5-triphosphatase RdgB dHATP 2C dITP 2C XTP-specific EC 3.6.1.15                         |
| Kingella denitrificans | VBIKinDen171475_2301 | Ornithine carbamoyltransferase EC 2.1.3.3                                                          |
| Kingella denitrificans | VBIKinDen171475_0570 | Ornithine carbamoyltransferase EC 2.1.3.3                                                          |
| Kingella denitrificans | VBIKinDen171475_1145 | Outer membrane protein P2 precursor                                                                |
| Kingella denitrificans | VBIKinDen171475_2256 | Pantoate--beta-alanine ligase EC 6.3.2.1                                                           |
| Kingella denitrificans | VBIKinDen171475_1159 | Peptidyl-prolyl cis-trans isomerase ppiB EC 5.2.1.8                                                |
| Kingella denitrificans | VBIKinDen171475_0448 | Phosphoglucosamine mutase EC 5.4.2.10                                                              |
| Kingella denitrificans | VBIKinDen171475_2240 | Phosphoheptose isomerase EC 5.3.1.-                                                                |
| Kingella denitrificans | VBIKinDen171475_1401 | Phosphoribosylaminoimidazole-succinocarboxamide synthase EC 6.3.2.6                                |
| Kingella denitrificans | VBIKinDen171475_1971 | Porphobilinogen deaminase EC 2.5.1.61                                                              |
| Kingella denitrificans | VBIKinDen171475_1266 | probable integral membrane protein NMA0408                                                         |
| Kingella denitrificans | VBIKinDen171475_0250 | Protein ImpG VasA                                                                                  |
| Kingella denitrificans | VBIKinDen171475_0580 | putative accessory processing protein                                                              |
| Kingella denitrificans | VBIKinDen171475_2087 | Putative two-domain glycosyltransferase                                                            |
| Kingella denitrificans | VBIKinDen171475_0516 | Pyridoxamine 5'-phosphate oxidase EC 1.4.3.5                                                       |
| Kingella denitrificans | VBIKinDen171475_0755 | Pyrrrole-5-carboxylate reductase EC 1.5.1.2                                                        |
| Kingella denitrificans | VBIKinDen171475_0660 | Radical SAM family enzyme 2C similar to coproporphyrinogen III oxidase 2C oxygen-independent       |
| Kingella denitrificans | VBIKinDen171475_2184 | Radical SAM family protein HutW 2C similar to coproporphyrinogen III oxidase 2C oxygen-independent |
| Kingella denitrificans | VBIKinDen171475_1698 | RNA polymerase sigma factor RpoH                                                                   |
| Kingella denitrificans | VBIKinDen171475_0606 | S-ribosylhomocysteine lyase EC 4.4.1.21 Autoinducer-2 production protein LuxS                      |
| Kingella denitrificans | VBIKinDen171475_2031 | Sel1 domain protein repeat-containing protein                                                      |
| Kingella denitrificans | VBIKinDen171475_2032 | Sel1 domain protein repeat-containing protein                                                      |
| Kingella denitrificans | VBIKinDen171475_2030 | Sel1 domain protein repeat-containing protein                                                      |
| Kingella denitrificans | VBIKinDen171475_1895 | Serine protease precursor MucD AlgY associated with sigma factor RpoE                              |
| Kingella denitrificans | VBIKinDen171475_0974 | Sigma factor RpoE negative regulatory protein RseB precursor                                       |
| Kingella denitrificans | VBIKinDen171475_1233 | Superoxide dismutase Cu-Zn precursor EC 1.15.1.1                                                   |
| Kingella denitrificans | VBIKinDen171475_1597 | Superoxide dismutase Fe EC 1.15.1.1                                                                |
| Kingella denitrificans | VBIKinDen171475_0667 | TonB-dependent hemin 2C ferrichrome receptor                                                       |
| Kingella denitrificans | VBIKinDen171475_0328 | Transcriptional repressor protein TyrR                                                             |
| Kingella denitrificans | VBIKinDen171475_1605 | Translation elongation factor Tu                                                                   |
| Kingella denitrificans | VBIKinDen171475_1628 | Translation elongation factor Tu                                                                   |
| Kingella denitrificans | VBIKinDen171475_0223 | Transport ATP-binding protein CydC                                                                 |
| Kingella denitrificans | VBIKinDen171475_1217 | Transport ATP-binding protein CydD                                                                 |
| Kingella denitrificans | VBIKinDen171475_1894 | Twitching motility protein PilT                                                                    |
| Kingella denitrificans | VBIKinDen171475_2088 | Two component system histidine kinase EC 2.7.3.-                                                   |
| Kingella denitrificans | VBIKinDen171475_2026 | Type IV fimbrial assembly 2C ATPase PilB                                                           |
| Kingella denitrificans | VBIKinDen171475_2028 | Type IV fimbrial assembly 2C ATPase PilB                                                           |
| Kingella denitrificans | VBIKinDen171475_2016 | Type IV fimbrial assembly protein PilC                                                             |
| Kingella denitrificans | VBIKinDen171475_0943 | Type IV pilus biogenesis protein PilQ                                                              |
| Kingella denitrificans | VBIKinDen171475_0229 | Type IV pilus biogenesis protein PilQ                                                              |
| Kingella denitrificans | VBIKinDen171475_1823 | Type IV secretion system protein VirD4                                                             |
| Kingella denitrificans | VBIKinDen171475_1696 | UDP-2 2C3-diacetylglucosamine hydrolase EC 3.6.1.-                                                 |
| Kingella denitrificans | VBIKinDen171475_0833 | UDP-3-O-3-hydroxymyristoyl glucosamine N-acyltransferase EC 2.3.1.-                                |
| Kingella denitrificans | VBIKinDen171475_2549 | Uncharacterized ABC transporter 2C ATP-binding protein YrbF                                        |
| Kingella denitrificans | VBIKinDen171475_0237 | Uncharacterized protein ImpJ VasE                                                                  |
| Kingella denitrificans | VBIKinDen171475_0415 | Undecaprenyl pyrophosphate synthetase EC 2.5.1.31                                                  |
| Kingella denitrificans | VBIKinDen171475_2140 | Undecaprenyl-phosphate galactosephosphotransferase EC 2.7.8.6                                      |
| Kingella denitrificans | VBIKinDen171475_1421 | Undecaprenyl-phosphate N-acetylglucosaminyl 1-phosphate transferase EC 2.7.8.-                     |
| Kingella denitrificans | VBIKinDen171475_1555 | Urease accessory protein UreG                                                                      |
| Kingella denitrificans | VBIKinDen171475_0796 | Uroporphyrinogen-III methyltransferase EC 2.1.1.107                                                |
| Kingella denitrificans | VBIKinDen171475_0500 | Uroporphyrinogen-III synthase EC 4.2.1.75                                                          |
| Kingella denitrificans | VBIKinDen171475_0291 | VgrG protein                                                                                       |
| Kingella denitrificans | VBIKinDen171475_2221 | Zinc ABC transporter 2C ATP-binding protein ZnuC                                                   |
| Kingella denitrificans | VBIKinDen171475_2442 | Zinc ABC transporter 2C periplasmic-binding protein ZnuA                                           |
| Kingella kingae        | VBIKinDen174532_1422 | 3-deoxy-D-manno-octulosonic-acid transferase EC 2.-.-.-                                            |

Table S8

|                        |                      |                                                                                    |
|------------------------|----------------------|------------------------------------------------------------------------------------|
| Kingella kingae        | VBIKinKin174532_1356 | 3R-hydroxymyristoyl-acyl carrier protein dehydratase EC 4.2.1.-                    |
| Kingella kingae        | VBIKinKin174532_1887 | ABC transporter 2C ATP-binding protein                                             |
| Kingella kingae        | VBIKinKin174532_1903 | ABC transporter related                                                            |
| Kingella kingae        | VBIKinKin174532_1298 | Acyl-acyl-carrier-protein--UDP-N- acetylglucosamine O-acyltransferase EC 2.3.1.129 |
| Kingella kingae        | VBIKinKin174532_1270 | ADP-heptose synthase EC 2.7.-.- D-glycero-beta-D-manno-heptose 7-phosphate kinase  |
| Kingella kingae        | VBIKinKin174532_1933 | Cell division transporter 2C ATP-binding protein FtsE TC 3.A.5.1.1                 |
| Kingella kingae        | VBIKinKin174532_1558 | Glutamate-1-semialdehyde aminotransferase EC 5.4.3.8                               |
| Kingella kingae        | VBIKinKin174532_0299 | Magnesium and cobalt efflux protein CorC                                           |
| Kingella kingae        | VBIKinKin174532_1418 | Membrane-associated zinc metalloprotease                                           |
| Kingella kingae        | VBIKinKin174532_1679 | NAD-dependent glyceraldehyde-3-phosphate dehydrogenase EC 1.2.1.12                 |
| Kingella kingae        | VBIKinKin174532_2078 | NADH-ubiquinone oxidoreductase chain G EC 1.6.5.3                                  |
| Kingella kingae        | VBIKinKin174532_1127 | Outer membrane protein A precursor                                                 |
| Kingella kingae        | VBIKinKin174532_1404 | Outer membrane protein assembly factor YaeT precursor                              |
| Kingella kingae        | VBIKinKin174532_0087 | Pyridoxamine 5'-phosphate oxidase EC 1.4.3.5                                       |
| Kingella kingae        | VBIKinKin174532_1864 | TonB-dependent siderophore receptor                                                |
| Kingella kingae        | VBIKinKin174532_1629 | Transcriptional regulatory protein RtcR                                            |
| Kingella kingae        | VBIKinKin174532_1397 | UDP-3-O-3-hydroxymyristoyl glucosamine N-acyltransferase EC 2.3.1.-                |
| Kingella kingae        | VBIKinKin174532_1724 | UDP-3-O-3-hydroxymyristoyl N-acetylglucosamine deacetylase EC 3.5.1.-              |
| Kingella kingae        | VBIKinKin174532_1557 | Undecaprenyl pyrophosphate synthetase EC 2.5.1.31                                  |
| Kingella oralis        | VBIKinOra3868_2198   | 1-acyl-sn-glycerol-3-phosphate acyltransferase EC 2.3.1.51                         |
| Kingella oralis        | VBIKinOra3868_0266   | 2-Keto-3-deoxy-D-manno-octulosonate-8-phosphate synthase EC 2.5.1.55               |
| Kingella oralis        | VBIKinOra3868_1021   | ABC transporter-related protein                                                    |
| Kingella oralis        | VBIKinOra3868_1357   | Alkaline protease secretion protein AprE                                           |
| Kingella oralis        | VBIKinOra3868_2531   | Aspartate 1-decarboxylase EC 4.1.1.11                                              |
| Kingella oralis        | VBIKinOra3868_1234   | ATP-dependent Clp protease ATP-binding subunit ClpA                                |
| Kingella oralis        | VBIKinOra3868_1057   | ClpB protein                                                                       |
| Kingella oralis        | VBIKinOra3868_0713   | Coproporphyrinogen III oxidase 2C oxygen-independent EC 1.3.99.22                  |
| Kingella oralis        | VBIKinOra3868_2958   | dTDP-4-dehydrorhamnose 3 2C5-epimerase EC 5.1.3.13                                 |
| Kingella oralis        | VBIKinOra3868_2989   | dTDP-4-dehydrorhamnose reductase EC 1.1.1.133                                      |
| Kingella oralis        | VBIKinOra3868_2365   | Enolase EC 4.2.1.11                                                                |
| Kingella oralis        | VBIKinOra3868_0818   | Ferrous iron transport protein B                                                   |
| Kingella oralis        | VBIKinOra3868_1435   | fimbrial biogenesis and twitching motility protein 2C probable NMB1309             |
| Kingella oralis        | VBIKinOra3868_2698   | GDP-mannose 4 2C6-dehydratase EC 4.2.1.47                                          |
| Kingella oralis        | VBIKinOra3868_3016   | Glucose-1-phosphate thymidyltransferase EC 2.7.7.24                                |
| Kingella oralis        | VBIKinOra3868_1560   | Glutamate transport ATP-binding protein                                            |
| Kingella oralis        | VBIKinOra3868_2684   | glycosyl transferase                                                               |
| Kingella oralis        | VBIKinOra3868_2780   | glycosyl transferase                                                               |
| Kingella oralis        | VBIKinOra3868_1092   | hypothetical protein                                                               |
| Kingella oralis        | VBIKinOra3868_1074   | hypothetical protein                                                               |
| Kingella oralis        | VBIKinOra3868_1638   | hypothetical protein                                                               |
| Kingella oralis        | VBIKinOra3868_1637   | hypothetical protein                                                               |
| Kingella oralis        | VBIKinOra3868_1726   | hypothetical protein                                                               |
| Kingella oralis        | VBIKinOra3868_2572   | Lipid A export ATP-binding permease protein MsbA EC 3.6.3.25                       |
| Kingella oralis        | VBIKinOra3868_0033   | Lipopolysaccharide heptosyltransferase I EC 2.4.1.-                                |
| Kingella oralis        | VBIKinOra3868_2686   | Mannose-1-phosphate guanylyltransferase GDP EC 2.7.7.22                            |
| Kingella oralis        | VBIKinOra3868_2951   | N-Acetylneuraminatase cytidyltransferase EC 2.7.7.43                               |
| Kingella oralis        | VBIKinOra3868_2754   | NAD-dependent epimerase dehydratase family protein                                 |
| Kingella oralis        | VBIKinOra3868_2408   | Nitrogen assimilation regulatory protein NtrX                                      |
| Kingella oralis        | VBIKinOra3868_2503   | Nitrous oxide reductase maturation protein NosF ATPase                             |
| Kingella oralis        | VBIKinOra3868_0725   | outer membrane protein I precursor                                                 |
| Kingella oralis        | VBIKinOra3868_1519   | Phosphoglucosamine mutase EC 5.4.2.10                                              |
| Kingella oralis        | VBIKinOra3868_1381   | putative cytolysin secretion ABC transporter                                       |
| Kingella oralis        | VBIKinOra3868_2202   | Pyrrrole-5-carboxylate reductase EC 1.5.1.2                                        |
| Kingella oralis        | VBIKinOra3868_0416   | sigma-54 dependent response regulator                                              |
| Kingella oralis        | VBIKinOra3868_0302   | sigma-54 dependent response regulator                                              |
| Kingella oralis        | VBIKinOra3868_0559   | sigma-54 dependent response regulator                                              |
| Kingella oralis        | VBIKinOra3868_1984   | TETRATRICOPEPTIDE REPEAT FAMILY PROTEIN                                            |
| Kingella oralis        | VBIKinOra3868_2047   | TETRATRICOPEPTIDE REPEAT FAMILY PROTEIN                                            |
| Kingella oralis        | VBIKinOra3868_1907   | TETRATRICOPEPTIDE REPEAT FAMILY PROTEIN                                            |
| Kingella oralis        | VBIKinOra3868_2134   | TETRATRICOPEPTIDE REPEAT FAMILY PROTEIN                                            |
| Kingella oralis        | VBIKinOra3868_1988   | TETRATRICOPEPTIDE REPEAT FAMILY PROTEIN                                            |
| Kingella oralis        | VBIKinOra3868_1889   | TETRATRICOPEPTIDE REPEAT FAMILY PROTEIN                                            |
| Kingella oralis        | VBIKinOra3868_2001   | TETRATRICOPEPTIDE REPEAT FAMILY PROTEIN                                            |
| Kingella oralis        | VBIKinOra3868_2002   | TETRATRICOPEPTIDE REPEAT FAMILY PROTEIN                                            |
| Kingella oralis        | VBIKinOra3868_2516   | Twitching motility protein PilT                                                    |
| Kingella oralis        | VBIKinOra3868_2437   | Two-component system response regulator QseB                                       |
| Kingella oralis        | VBIKinOra3868_0160   | Type IV pilus biogenesis protein PilM                                              |
| Kingella oralis        | VBIKinOra3868_0206   | Type IV pilus biogenesis protein PilN                                              |
| Kingella oralis        | VBIKinOra3868_0224   | Type IV pilus biogenesis protein PilQ                                              |
| Kingella oralis        | VBIKinOra3868_1581   | UDP-glucose 4-epimerase EC 5.1.3.2                                                 |
| Klebsiella pneumoniae  | VBIKlePne146004_3147 | dTDP-4-dehydrorhamnose reductase EC 1.1.1.133                                      |
| Klebsiella pneumoniae  | VBIKlePne146004_1120 | dTDP-glucose 4 2C6-dehydratase EC 4.2.1.46                                         |
| Klebsiella pneumoniae  | VBIKlePne146004_5164 | Lipid A biosynthesis lauroyl acyltransferase EC 2.3.1.-                            |
| Klebsiella pneumoniae  | VBIKlePne146004_3997 | Phosphate regulon transcriptional regulatory protein PhoB SphR                     |
| Klebsiella pneumoniae  | VBIKlePne146004_3080 | Phosphoribosylaminoimidazole-succinocarboxamide synthase EC 6.3.2.6                |
| Klebsiella pneumoniae  | VBIKlePne146004_2447 | TonB-dependent siderophore receptor                                                |
| Klebsiella pneumoniae  | VBIKlePne146004_2429 | UDP-galactose-lipid carrier transferase EC 2.-.-.-                                 |
| Klebsiella pneumoniae  | VBIKlePne146004_3630 | UDP-N-acetylglucosamine 4 2C6-dehydratase EC 4.2.1.-                               |
| Kytococcus sedentarius | VBIKytSed14067_2014  | Ferric anguibactin transport system permease protein fatD                          |

|                                |                      |                                                                                                                                                                                                            |
|--------------------------------|----------------------|------------------------------------------------------------------------------------------------------------------------------------------------------------------------------------------------------------|
| Kytococcus sedentarius         | VBIKytSed14067_2133  | Iron compound ABC uptake transporter substrate-binding protein PiuA                                                                                                                                        |
| Kytococcus sedentarius         | VBIKytSed14067_0817  | Petrobactin ABC transporter 2C permease protein II                                                                                                                                                         |
| Kytococcus sedentarius         | VBIKytSed14067_0671  | Radical SAM family enzyme 2C similar to coproporphyrinogen III oxidase 2C oxygen-independent 2C clustered with nucleoside-dependent receptor 3B Outer membrane receptor for ferrienterochelin and colicins |
| Kytococcus sedentarius         | VBIKytSed14067_2291  | Anthranilate phosphoribosyltransferase EC 2.4.2.18                                                                                                                                                         |
| Lachnospiraceae oral taxon 082 | VBILacBac168637_0702 | Lipid A acylation protein PagP 2C palmitoyltransferase                                                                                                                                                     |
| Lachnospiraceae oral taxon 082 | VBILacBac168637_2021 | Uroporphyrinogen III decarboxylase EC 4.1.1.37                                                                                                                                                             |
| Lachnospiraceae oral taxon 082 | VBILacBac168637_0822 | ABC-type multidrug transport system 2C ATPase component                                                                                                                                                    |
| Lachnospiraceae oral taxon 107 | VBILacOra53760_2698  | ABC-type multidrug transport system 2C permease component                                                                                                                                                  |
| Lachnospiraceae oral taxon 107 | VBILacOra53760_0830  | ABC-type multidrug transport system 2C permease component                                                                                                                                                  |
| Lachnospiraceae oral taxon 107 | VBILacOra53760_0562  | Alkaline protease secretion protein AprE                                                                                                                                                                   |
| Lachnospiraceae oral taxon 107 | VBILacOra53760_2799  | Arabinose 5-phosphate isomerase EC 5.3.1.13                                                                                                                                                                |
| Lachnospiraceae oral taxon 107 | VBILacOra53760_0019  | Arabinose 5-phosphate isomerase EC 5.3.1.13                                                                                                                                                                |
| Lachnospiraceae oral taxon 107 | VBILacOra53760_1636  | ATP synthase beta chain EC 3.6.3.14                                                                                                                                                                        |
| Lachnospiraceae oral taxon 107 | VBILacOra53760_1800  | bifunctional hemolysin-adenylate cyclase precursor                                                                                                                                                         |
| Lachnospiraceae oral taxon 107 | VBILacOra53760_2645  | CipB protein                                                                                                                                                                                               |
| Lachnospiraceae oral taxon 107 | VBILacOra53760_2150  | Enolase EC 4.2.1.11                                                                                                                                                                                        |
| Lachnospiraceae oral taxon 107 | VBILacOra53760_2202  | GTP pyrophosphokinase EC 2.7.6.5 2C pppGpp synthetase II Guanosine-3' 2C5'-bis(diphosphate) 3'-pyrophosphohydrolyase                                                                                       |
| Lachnospiraceae oral taxon 107 | VBILacOra53760_0431  | iron-regulated protein FrpA                                                                                                                                                                                |
| Lachnospiraceae oral taxon 107 | VBILacOra53760_2041  | Lipopolysaccharide heptosyltransferase I EC 2.4.1.-                                                                                                                                                        |
| Lachnospiraceae oral taxon 107 | VBILacOra53760_2711  | Membrane-associated zinc metalloprotease                                                                                                                                                                   |
| Lachnospiraceae oral taxon 107 | VBILacOra53760_2837  | NADH-ubiquinone oxidoreductase chain G EC 1.6.5.3                                                                                                                                                          |
| Lachnospiraceae oral taxon 107 | VBILacOra53760_2720  | Nitrous oxide reductase maturation protein NosF ATPase                                                                                                                                                     |
| Lachnospiraceae oral taxon 107 | VBILacOra53760_1941  | Oligopeptide ABC transporter 2C periplasmic oligopeptide-binding protein OppA TC 3.A.1.5.1                                                                                                                 |
| Lachnospiraceae oral taxon 107 | VBILacOra53760_2276  | Oligopeptide transport ATP-binding protein OppD TC 3.A.1.5.1                                                                                                                                               |
| Lachnospiraceae oral taxon 107 | VBILacOra53760_2204  | Outer membrane hemoglobin-haptoglobin utilization protein HpuA                                                                                                                                             |
| Lachnospiraceae oral taxon 107 | VBILacOra53760_0265  | Outer membrane protein class 1                                                                                                                                                                             |
| Lachnospiraceae oral taxon 107 | VBILacOra53760_2423  | Porphobilinogen synthase EC 4.2.1.24                                                                                                                                                                       |
| Lachnospiraceae oral taxon 107 | VBILacOra53760_2845  | Probable polybeta-D-mannuronate O-acetylase EC 2.3.1.-                                                                                                                                                     |
| Lachnospiraceae oral taxon 107 | VBILacOra53760_2847  | Sel1 domain protein                                                                                                                                                                                        |
| Lachnospiraceae oral taxon 107 | VBILacOra53760_1475  | Sel1 domain protein                                                                                                                                                                                        |
| Lachnospiraceae oral taxon 107 | VBILacOra53760_1322  | Sel1 domain protein                                                                                                                                                                                        |
| Lachnospiraceae oral taxon 107 | VBILacOra53760_0999  | Sel1 domain protein                                                                                                                                                                                        |
| Lachnospiraceae oral taxon 107 | VBILacOra53760_1003  | Sel1 domain protein                                                                                                                                                                                        |
| Lachnospiraceae oral taxon 107 | VBILacOra53760_1137  | Sel1 domain protein repeat-containing protein                                                                                                                                                              |
| Lachnospiraceae oral taxon 107 | VBILacOra53760_0876  | Sel1 domain protein repeat-containing protein                                                                                                                                                              |
| Lachnospiraceae oral taxon 107 | VBILacOra53760_0976  | Sel1 domain protein repeat-containing protein                                                                                                                                                              |
| Lachnospiraceae oral taxon 107 | VBILacOra53760_0892  | Translation elongation factor Tu                                                                                                                                                                           |
| Lachnospiraceae oral taxon 107 | VBILacOra53760_0987  | Two component system histidine kinase EC 2.7.3.-                                                                                                                                                           |
| Lachnospiraceae oral taxon 107 | VBILacOra53760_2838  | Type IV fimbrial assembly 2C ATPase PilB                                                                                                                                                                   |
| Lachnospiraceae oral taxon 107 | VBILacOra53760_2279  | Type IV fimbrial assembly protein PilC                                                                                                                                                                     |
| Lachnospiraceae oral taxon 107 | VBILacOra53760_2404  | Type IV fimbrial biogenesis protein PilY1                                                                                                                                                                  |
| Lachnospiraceae oral taxon 107 | VBILacOra53760_1629  | Zinc ABC transporter 2C inner membrane permease protein ZnuB                                                                                                                                               |
| Lachnospiraceae oral taxon 107 | VBILacOra53760_2431  | 2 2C3-butanediol dehydrogenase 2C S-alcohol forming 2C S-acetoin-specific EC 1.1.1.76                                                                                                                      |
| Lactobacillus acidophilus      | VBILacAci7974_0202   | ABC-transport system ATP-binding protein                                                                                                                                                                   |
| Lactobacillus acidophilus      | VBILacAci137213_1690 | Bacillosamine Legionaminic acid biosynthesis aminotransferase PglE 3B 4-keto-6-deoxy-N-Acetyl-D-hexosaminy-Lipid c                                                                                         |
| Lactobacillus acidophilus      | VBILacAci137213_0387 | dTDP-glucose 4 2C6-dehydratase EC 4.2.1.46                                                                                                                                                                 |
| Lactobacillus acidophilus      | VBILacAci137213_1453 | Ferric iron ABC transporter 2C iron-binding protein                                                                                                                                                        |
| Lactobacillus acidophilus      | VBILacAci137213_1887 | Ferric iron ABC transporter 2C permease protein                                                                                                                                                            |
| Lactobacillus acidophilus      | VBILacAci137213_1756 | Ferrochelatase 2C protoheme ferro-lyase EC 4.99.1.1                                                                                                                                                        |
| Lactobacillus acidophilus      | VBILacAci137213_0944 | FIG00850595 hypothetical protein                                                                                                                                                                           |
| Lactobacillus acidophilus      | VBILacAci137213_0451 | FKBP-type peptidyl-prolyl cis-trans isomerase fklB EC 5.2.1.8                                                                                                                                              |
| Lactobacillus acidophilus      | VBILacAci7974_0442   | Glucose-1-phosphate thymidyltransferase EC 2.7.7.24                                                                                                                                                        |
| Lactobacillus acidophilus      | VBILacAci137213_0895 | Glucose-6-phosphate isomerase EC 5.3.1.9                                                                                                                                                                   |
| Lactobacillus acidophilus      | VBILacAci137213_1603 | Glutamate transport ATP-binding protein                                                                                                                                                                    |
| Lactobacillus acidophilus      | VBILacAci137213_0318 | GTP pyrophosphokinase EC 2.7.6.5 2C pppGpp synthetase II Guanosine-3' 2C5'-bis(diphosphate) 3'-pyrophosphohydrolyase                                                                                       |
| Lactobacillus acidophilus      | VBILacAci137213_0423 | hypothetical protein                                                                                                                                                                                       |
| Lactobacillus acidophilus      | VBILacAci7974_0678   | hypothetical protein                                                                                                                                                                                       |
| Lactobacillus acidophilus      | VBILacAci7974_1236   | hypothetical protein                                                                                                                                                                                       |
| Lactobacillus acidophilus      | VBILacAci7974_1179   | hypothetical protein                                                                                                                                                                                       |
| Lactobacillus acidophilus      | VBILacAci7974_0709   | hypothetical protein                                                                                                                                                                                       |
| Lactobacillus acidophilus      | VBILacAci7974_0698   | hypothetical protein                                                                                                                                                                                       |
| Lactobacillus acidophilus      | VBILacAci7974_1134   | hypothetical protein                                                                                                                                                                                       |
| Lactobacillus acidophilus      | VBILacAci7974_0192   | Lipid A export ATP-binding permease protein MsbA EC 3.6.3.25                                                                                                                                               |
| Lactobacillus acidophilus      | VBILacAci7974_1555   | Membrane-bound lytic murein transglycosylase B precursor EC 3.2.1.-                                                                                                                                        |
| Lactobacillus acidophilus      | VBILacAci137213_1494 | MotA TolQ ExbB proton channel family protein                                                                                                                                                               |
| Lactobacillus acidophilus      | VBILacAci7974_1765   | NAD-dependent glyceraldehyde-3-phosphate dehydrogenase EC 1.2.1.12                                                                                                                                         |
| Lactobacillus acidophilus      | VBILacAci137213_1734 | Nitrogen assimilation regulatory protein NtrX                                                                                                                                                              |
| Lactobacillus acidophilus      | VBILacAci137213_1699 | Phosphoglucosamine mutase EC 5.4.2.10                                                                                                                                                                      |
| Lactobacillus acidophilus      | VBILacAci137213_1913 | Porphobilinogen deaminase EC 2.5.1.61                                                                                                                                                                      |
| Lactobacillus acidophilus      | VBILacAci7974_1656   | Putrescine transport ATP-binding protein PotG TC 3.A.1.11.2                                                                                                                                                |
| Lactobacillus acidophilus      | VBILacAci7974_0500   | RNA polymerase sigma factor RpoD                                                                                                                                                                           |
| Lactobacillus acidophilus      | VBILacAci137213_1079 | Sel1 domain protein repeat-containing protein                                                                                                                                                              |
| Lactobacillus acidophilus      | VBILacAci137213_0040 | Twitching motility protein PilT                                                                                                                                                                            |
| Lactobacillus acidophilus      | VBILacAci137213_0408 | Type IV pilus biogenesis protein PilF                                                                                                                                                                      |
| Lactobacillus acidophilus      | VBILacAci137213_1888 | UDP-2 2C3-diacetylglucosamine hydrolase EC 3.6.1.-                                                                                                                                                         |
| Lactobacillus acidophilus      | VBILacAci7974_0153   | UDP-glucose 4-epimerase EC 5.1.3.2                                                                                                                                                                         |
| Lactobacillus brevis           | VBILacBre13134_1571  | ABC transporter 2C ATP-binding protein                                                                                                                                                                     |
| Lactobacillus brevis           | VBILacBre134470_1517 | ABC transporter protein IroC                                                                                                                                                                               |
| Lactobacillus brevis           | VBILacBre134470_1674 | ABC transporter protein IroC                                                                                                                                                                               |

Table S8

|                            |                      |                                                                                                      |
|----------------------------|----------------------|------------------------------------------------------------------------------------------------------|
| Lactobacillus brevis       | VBILacBre134470_0951 | Cell division trigger factor EC 5.2.1.8                                                              |
| Lactobacillus brevis       | VBILacBre134470_1325 | Enolase EC 4.2.1.11                                                                                  |
| Lactobacillus brevis       | VBILacBre134470_1768 | FIG138576 3-oxoacyl-ACP synthase EC 2.3.1.41                                                         |
| Lactobacillus brevis       | VBILacBre13134_1962  | Lipid-A-disaccharide synthase EC 2.4.1.182                                                           |
| Lactobacillus brevis       | VBILacBre134470_1489 | mannose-specific adhesin FimH                                                                        |
| Lactobacillus brevis       | VBILacBre134470_0667 | NADH-ubiquinone oxidoreductase chain G EC 1.6.5.3                                                    |
| Lactobacillus brevis       | VBILacBre13134_1858  | Pyridoxamine 5'-phosphate oxidase EC 1.4.3.5                                                         |
| Lactobacillus brevis       | VBILacBre13134_2817  | Transcriptional regulatory protein RtcR                                                              |
| Lactobacillus brevis       | VBILacBre13134_1099  | UDP-3-O-3-hydroxymyristoyl N-acetylglucosamine deacetylase EC 3.5.1.-                                |
| Lactobacillus brevis       | VBILacBre134470_0608 | Uncharacterized ABC transporter 2C ATP-binding protein YrbF                                          |
| Lactobacillus buchneri     | VBILacBuc113131_0208 | ABC transporter 2C ATP-binding protein                                                               |
| Lactobacillus buchneri     | VBILacBuc105504_1912 | ABC-type Fe3+-siderophore transport system 2C ATPase component                                       |
| Lactobacillus buchneri     | VBILacBuc105504_0957 | ABC-type multidrug transport system 2C ATPase component                                              |
| Lactobacillus buchneri     | VBILacBuc105504_0111 | Alcohol dehydrogenase EC 1.1.1.1 3B Acetaldehyde dehydrogenase EC 1.2.1.10                           |
| Lactobacillus buchneri     | VBILacBuc113131_1472 | ATP synthase beta chain EC 3.6.3.14                                                                  |
| Lactobacillus buchneri     | VBILacBuc113131_0829 | ATP-dependent Clp protease ATP-binding subunit ClpA                                                  |
| Lactobacillus buchneri     | VBILacBuc113131_2491 | Cation transport ATPase                                                                              |
| Lactobacillus buchneri     | VBILacBuc105504_0933 | Glucose-1-phosphate thymidyltransferase EC 2.7.7.24                                                  |
| Lactobacillus buchneri     | VBILacBuc113131_1097 | Late competence protein ComGA 2C access of DNA to ComEA                                              |
| Lactobacillus buchneri     | VBILacBuc113131_2632 | Phosphate transport ATP-binding protein PstB TC 3.A.1.7.1                                            |
| Lactobacillus buchneri     | VBILacBuc113131_0288 | PII-type proteinase precursor EC 3.4.21.96                                                           |
| Lactobacillus buchneri     | VBILacBuc105504_0970 | Protein export cytoplasm protein SecA ATPase RNA helicase TC 3.A.5.1.1                               |
| Lactobacillus buchneri     | VBILacBuc113131_1704 | RNA polymerase sigma factor RpoD                                                                     |
| Lactobacillus buchneri     | VBILacBuc105504_0050 | Selenocysteine-specific translation elongation factor                                                |
| Lactobacillus buchneri     | VBILacBuc113131_2036 | Sortase A 2C LPXTG specific                                                                          |
| Lactobacillus buchneri     | VBILacBuc105504_1235 | Translation elongation factor Tu                                                                     |
| Lactobacillus buchneri     | VBILacBuc113131_1367 | Two-component system histidine kinase                                                                |
| Lactobacillus buchneri     | VBILacBuc105504_0511 | Type IV pilus biogenesis protein PilQ                                                                |
| Lactobacillus buchneri     | VBILacBuc113131_0912 | UDP-N-acetylenolpyruvoylglucosamine reductase EC 1.1.1.158                                           |
| Lactobacillus casei        | VBILacCas45142_1891  | ABC-type multidrug transport system 2C ATPase and permease components                                |
| Lactobacillus casei        | VBILacCas89204_0105  | ABC-type multidrug transport system 2C ATPase and permease components                                |
| Lactobacillus casei        | VBILacCas89204_2269  | Asparagine synthetase glutamine-hydrolyzing EC 6.3.5.4                                               |
| Lactobacillus casei        | VBILacCas89204_0981  | Bacteriocin ABC-transporter 2C ATP-binding and permease component                                    |
| Lactobacillus casei        | VBILacCas45142_0261  | Heat shock protein 60 family chaperone GroEL                                                         |
| Lactobacillus casei        | VBILacCas45142_1869  | Maltose maltodextrin transport ATP-binding protein MalK EC 3.6.3.19                                  |
| Lactobacillus casei        | VBILacCas89204_2977  | Mg2+ transport ATPase 2C P-type EC 3.6.3.2                                                           |
| Lactobacillus casei        | VBILacCas45142_1052  | Oligopeptide ABC transporter 2C periplasmic oligopeptide-binding protein OppA TC 3.A.1.5.1           |
| Lactobacillus casei        | VBILacCas89204_2636  | Oligopeptide transport ATP-binding protein OppD TC 3.A.1.5.1                                         |
| Lactobacillus casei        | VBILacCas89204_1466  | sensor protein                                                                                       |
| Lactobacillus casei        | VBILacCas89204_1988  | Surface protein Rib                                                                                  |
| Lactobacillus casei        | VBILacCas89204_1942  | Surface protein Rib                                                                                  |
| Lactobacillus casei        | VBILacCas89204_2121  | Surface protein Rib                                                                                  |
| Lactobacillus casei        | VBILacCas89204_2119  | Surface protein Rib                                                                                  |
| Lactobacillus casei        | VBILacCas89204_2256  | Surface protein Rib                                                                                  |
| Lactobacillus casei        | VBILacCas89204_1603  | two-component system response regulator                                                              |
| Lactobacillus coleohominis | VBILacCol129754_1676 | ABC-type multidrug transport system 2C ATPase and permease components                                |
| Lactobacillus coleohominis | VBILacCol129754_0061 | Alcohol dehydrogenase EC 1.1.1.1 3B Acetaldehyde dehydrogenase EC 1.2.1.10                           |
| Lactobacillus coleohominis | VBILacCol129754_0251 | Late competence protein ComGA 2C access of DNA to ComEA                                              |
| Lactobacillus coleohominis | VBILacCol129754_0380 | Mannose-6-phosphate isomerase EC 5.3.1.8                                                             |
| Lactobacillus coleohominis | VBILacCol129754_0968 | Oligopeptide transport ATP-binding protein OppD TC 3.A.1.5.1                                         |
| Lactobacillus coleohominis | VBILacCol129754_0106 | Putative mannosyltransferase involved in polysaccharide biosynthesis                                 |
| Lactobacillus coleohominis | VBILacCol129754_0250 | Putrescine transport ATP-binding protein PotA TC 3.A.1.11.1                                          |
| Lactobacillus coleohominis | VBILacCol129754_0955 | RNA polymerase sigma factor RpoD                                                                     |
| Lactobacillus coleohominis | VBILacCol129754_0957 | Sortase A 2C LPXTG specific                                                                          |
| Lactobacillus coleohominis | VBILacCol129754_1571 | Surface protein Rib                                                                                  |
| Lactobacillus coleohominis | VBILacCol129754_1135 | Surface protein Rib                                                                                  |
| Lactobacillus coleohominis | VBILacCol129754_1095 | Surface protein Rib                                                                                  |
| Lactobacillus coleohominis | VBILacCol129754_1011 | Surface protein Rib                                                                                  |
| Lactobacillus coleohominis | VBILacCol129754_1193 | Surface protein Rib                                                                                  |
| Lactobacillus crispatus    | VBILacCri16252_0580  | 2-Keto-3-deoxy-D-manno-octulosonate-8-phosphate synthase EC 2.5.1.55                                 |
| Lactobacillus crispatus    | VBILacCri16252_0874  | 3-oxoacyl-acyl-carrier-protein synthase 2C KASII EC 2.3.1.41                                         |
| Lactobacillus crispatus    | VBILacCri68631_0447  | 3-oxoacyl-acyl-carrier-protein synthase 2C KASII EC 2.3.1.41                                         |
| Lactobacillus crispatus    | VBILacCri90530_1226  | ABC transporter 2C ATP-binding protein                                                               |
| Lactobacillus crispatus    | VBILacCri66009_1376  | ABC transporter 2C ATP-binding protein                                                               |
| Lactobacillus crispatus    | VBILacCri68631_0021  | ABC transporter 2C ATP-binding protein                                                               |
| Lactobacillus crispatus    | VBILacCri90530_1805  | Alpha-D-GlcNAc alpha-1 2C2-L-rhamnosyltransferase EC 2.4.1.-                                         |
| Lactobacillus crispatus    | VBILacCri16252_0491  | ATP synthase beta chain EC 3.6.3.14                                                                  |
| Lactobacillus crispatus    | VBILacCri66009_1304  | ATP synthase beta chain EC 3.6.3.14                                                                  |
| Lactobacillus crispatus    | VBILacCri68631_1403  | ATP-dependent protease ATP-binding subunit clpL                                                      |
| Lactobacillus crispatus    | VBILacCri68631_1858  | Cell division trigger factor EC 5.2.1.8                                                              |
| Lactobacillus crispatus    | VBILacCri68631_1310  | Cell envelope-associated transcriptional attenuator LytR-CpsA-Psr 2C subfamily F2 as in PMID19099556 |
| Lactobacillus crispatus    | VBILacCri66009_0509  | CoA-acylating propionaldehyde dehydrogenase                                                          |
| Lactobacillus crispatus    | VBILacCri66009_1088  | DNA-binding response regulator 2C OmpR family                                                        |
| Lactobacillus crispatus    | VBILacCri68631_1584  | Dolichol-phosphate mannosyltransferase EC 2.4.1.83 in lipid-linked oligosaccharide synthesis cluster |
| Lactobacillus crispatus    | VBILacCri16252_0252  | Enolase EC 4.2.1.11                                                                                  |
| Lactobacillus crispatus    | VBILacCri90530_0158  | Ferrous iron transport protein B                                                                     |
| Lactobacillus crispatus    | VBILacCri68631_1681  | FIG00745314 hypothetical protein                                                                     |
| Lactobacillus crispatus    | VBILacCri68631_0173  | FIG00751048 hypothetical protein                                                                     |
| Lactobacillus crispatus    | VBILacCri66009_1035  | glycosyl transferase 2C group 1                                                                      |

|                         |                      |                                                                                                                   |
|-------------------------|----------------------|-------------------------------------------------------------------------------------------------------------------|
| Lactobacillus crispatus | VBILacCri90530_1507  | glycosyl transferase family 2                                                                                     |
| Lactobacillus crispatus | VBILacCri68631_0710  | GTP pyrophosphokinase EC 2.7.6.5 2C pppGpp synthetase I                                                           |
| Lactobacillus crispatus | VBILacCri68631_0400  | Hemolysins and related proteins containing CBS domains                                                            |
| Lactobacillus crispatus | VBILacCri68631_1311  | Lipid A export ATP-binding permease protein MsbA                                                                  |
| Lactobacillus crispatus | VBILacCri16252_0045  | Lipid A export ATP-binding permease protein MsbA                                                                  |
| Lactobacillus crispatus | VBILacCri90530_0019  | Lipoate-protein ligase A                                                                                          |
| Lactobacillus crispatus | VBILacCri68631_0484  | Lipoate-protein ligase A                                                                                          |
| Lactobacillus crispatus | VBILacCri16252_1804  | N-acetylmuramoyl-L-alanine amidase 2C family 4                                                                    |
| Lactobacillus crispatus | VBILacCri16252_0528  | NAD-dependent glyceraldehyde-3-phosphate dehydrogenase EC 1.2.1.12                                                |
| Lactobacillus crispatus | VBILacCri68631_0206  | NAD-dependent glyceraldehyde-3-phosphate dehydrogenase EC 1.2.1.12                                                |
| Lactobacillus crispatus | VBILacCri66009_1985  | Oligopeptide transport ATP-binding protein OppF TC 3.A.1.5.1                                                      |
| Lactobacillus crispatus | VBILacCri66009_0524  | Oligopeptide transport ATP-binding protein OppF TC 3.A.1.5.1                                                      |
| Lactobacillus crispatus | VBILacCri68631_1768  | Prolipoprotein diacylglycerol transferase EC 2.4.99.-                                                             |
| Lactobacillus crispatus | VBILacCri16252_1781  | Protein export cytoplasm protein SecA ATPase RNA helicase TC 3.A.5.1.1                                            |
| Lactobacillus crispatus | VBILacCri68631_0620  | PrfP precursor                                                                                                    |
| Lactobacillus crispatus | VBILacCri16252_0904  | PrfP precursor                                                                                                    |
| Lactobacillus crispatus | VBILacCri90530_1967  | Putative ABC transporter ATP-binding protein 2C spy1790 homolog                                                   |
| Lactobacillus crispatus | VBILacCri66009_0535  | Putrescine transport ATP-binding protein PotA TC 3.A.1.11.1                                                       |
| Lactobacillus crispatus | VBILacCri66009_1853  | RNA binding methyltransferase FtsJ like                                                                           |
| Lactobacillus crispatus | VBILacCri16252_1810  | RNA binding methyltransferase FtsJ like                                                                           |
| Lactobacillus crispatus | VBILacCri66009_0974  | Serine protease 2C DegP Htra 2C do-like EC 3.4.21.-                                                               |
| Lactobacillus crispatus | VBILacCri16252_1839  | Translation elongation factor Tu                                                                                  |
| Lactobacillus crispatus | VBILacCri16252_1275  | Translation elongation factor Tu                                                                                  |
| Lactobacillus crispatus | VBILacCri90530_2164  | Transport ATP-binding protein CydC                                                                                |
| Lactobacillus crispatus | VBILacCri68631_1025  | Transport ATP-binding protein CydD                                                                                |
| Lactobacillus crispatus | VBILacCri68631_0333  | Two-component response regulator SA14-24                                                                          |
| Lactobacillus crispatus | VBILacCri66009_0908  | Tyrosine-protein kinase EpsD EC 2.7.10.2                                                                          |
| Lactobacillus crispatus | VBILacCri68631_0798  | Tyrosine-protein kinase EpsD EC 2.7.10.2                                                                          |
| Lactobacillus crispatus | VBILacCri66009_0377  | UDP-N-acetylglucosamine 2-epimerase EC 5.1.3.14                                                                   |
| Lactobacillus fermentum | VBILacFer68609_0152  | ABC transporter ATP-binding protein YvcR                                                                          |
| Lactobacillus fermentum | VBILacFer94112_0288  | Catabolite control protein A                                                                                      |
| Lactobacillus fermentum | VBILacFer68609_0274  | Cell division trigger factor EC 5.2.1.8                                                                           |
| Lactobacillus fermentum | VBILacFer94112_0873  | Enolase EC 4.2.1.11                                                                                               |
| Lactobacillus fermentum | VBILacFer94112_0180  | Glycosyltransferase                                                                                               |
| Lactobacillus fermentum | VBILacFer94112_0393  | Lipid A export ATP-binding permease protein MsbA                                                                  |
| Lactobacillus fermentum | VBILacFer68609_1289  | Lipoate-protein ligase A                                                                                          |
| Lactobacillus fermentum | VBILacFer68609_1057  | Oligopeptide transport ATP-binding protein OppD TC 3.A.1.5.1                                                      |
| Lactobacillus fermentum | VBILacFer68609_0741  | Oligopeptide transport ATP-binding protein OppF TC 3.A.1.5.1                                                      |
| Lactobacillus fermentum | VBILacFer68609_1630  | Polyglycerol-phosphate alpha-glucosyltransferase EC 2.4.1.52                                                      |
| Lactobacillus fermentum | VBILacFer94112_1207  | putative ATP-dependent Clp proteinase ATP-binding subunit                                                         |
| Lactobacillus fermentum | VBILacFer94112_1136  | putative ATP-dependent Clp proteinase ATP-binding subunit                                                         |
| Lactobacillus fermentum | VBILacFer94112_1769  | sensor histidine kinase                                                                                           |
| Lactobacillus fermentum | VBILacFer68609_0434  | two component transcriptional regulator 2C winged helix family                                                    |
| Lactobacillus fermentum | VBILacFer68609_1602  | UDP-galactopyranose mutase EC 5.4.99.9                                                                            |
| Lactobacillus fermentum | VBILacFer94112_1109  | UDP-glucose 4-epimerase EC 5.1.3.2                                                                                |
| Lactobacillus gasseri   | VBILacGas62225_1515  | 2 C3-butanediol dehydrogenase 2C S-alcohol forming 2C R-acetoin-specific EC 1.1.1.4 Acetoin diacetyl reductase EC |
| Lactobacillus gasseri   | VBILacGas103493_1276 | ABC transporter 2C ATP-binding and permease protein                                                               |
| Lactobacillus gasseri   | VBILacGas62225_0215  | ABC transporter 2C ATP-binding and permease protein                                                               |
| Lactobacillus gasseri   | VBILacGas62225_0158  | ABC transporter 2C ATP-binding permease protein                                                                   |
| Lactobacillus gasseri   | VBILacGas39627_0591  | ABC transporter 2C ATP-binding permease protein                                                                   |
| Lactobacillus gasseri   | VBILacGas62225_1101  | ABC transporter 2C ATP-binding permease protein                                                                   |
| Lactobacillus gasseri   | VBILacGas103493_0903 | ABC transporter 2C ATP-binding permease protein                                                                   |
| Lactobacillus gasseri   | VBILacGas103493_0117 | ABC transporter 2C ATP-binding permease protein                                                                   |
| Lactobacillus gasseri   | VBILacGas103493_1336 | ABC transporter 2C ATP-binding protein                                                                            |
| Lactobacillus gasseri   | VBILacGas39627_0419  | ABC transporter permease component                                                                                |
| Lactobacillus gasseri   | VBILacGas103493_0968 | Alcohol dehydrogenase EC 1.1.1.1 3B Acetaldehyde dehydrogenase EC 1.2.1.10                                        |
| Lactobacillus gasseri   | VBILacGas103492_0899 | ATP synthase beta chain EC 3.6.3.14                                                                               |
| Lactobacillus gasseri   | VBILacGas39627_0045  | ATP synthase beta chain EC 3.6.3.14                                                                               |
| Lactobacillus gasseri   | VBILacGas39627_0678  | ATP synthase beta chain EC 3.6.3.14                                                                               |
| Lactobacillus gasseri   | VBILacGas39627_0958  | ATP-dependent Clp protease ATP-binding subunit ClpA                                                               |
| Lactobacillus gasseri   | VBILacGas39627_1648  | ATP-dependent Clp protease ATP-binding subunit ClpA                                                               |
| Lactobacillus gasseri   | VBILacGas62225_1158  | ATP-dependent Clp protease ATP-binding subunit ClpA                                                               |
| Lactobacillus gasseri   | VBILacGas39627_1622  | ATP-dependent Clp protease ATP-binding subunit ClpA                                                               |
| Lactobacillus gasseri   | VBILacGas39627_1608  | ATPase component of general energizing module of ECF transporters                                                 |
| Lactobacillus gasseri   | VBILacGas39627_1602  | Bactoprenol glucosyl transferase EC 2.4.1.-                                                                       |
| Lactobacillus gasseri   | VBILacGas103492_0002 | Beta-1 2C3-glucosyltransferase                                                                                    |
| Lactobacillus gasseri   | VBILacGas103492_0207 | Cell division transporter 2C ATP-binding protein FtsE TC 3.A.5.1.1                                                |
| Lactobacillus gasseri   | VBILacGas62225_1275  | Cell division transporter 2C ATP-binding protein FtsE TC 3.A.5.1.1                                                |
| Lactobacillus gasseri   | VBILacGas39627_0548  | Cell division transporter 2C ATP-binding protein FtsE TC 3.A.5.1.1                                                |
| Lactobacillus gasseri   | VBILacGas39627_1532  | Diaminopimelate decarboxylase EC 4.1.1.20                                                                         |
| Lactobacillus gasseri   | VBILacGas39627_0256  | dTDP-4-dehydrorhamnose reductase EC 1.1.1.133                                                                     |
| Lactobacillus gasseri   | VBILacGas103493_0561 | Glutamine ABC transporter 2C periplasmic glutamine-binding protein TC 3.A.1.3.2                                   |
| Lactobacillus gasseri   | VBILacGas39627_1643  | Heat shock protein 60 family chaperone GroEL                                                                      |
| Lactobacillus gasseri   | VBILacGas62225_1298  | Membrane protein                                                                                                  |
| Lactobacillus gasseri   | VBILacGas62225_1308  | Membrane protein                                                                                                  |
| Lactobacillus gasseri   | VBILacGas62225_1264  | Membrane protein involved in the export of O-antigen 2C teichoic acid lipoteichoic acids                          |
| Lactobacillus gasseri   | VBILacGas62225_0353  | Methionine ABC transporter ATP-binding protein                                                                    |
| Lactobacillus gasseri   | VBILacGas39627_0459  | Oligopeptide ABC transporter 2C periplasmic oligopeptide-binding protein OppA TC 3.A.1.5.1                        |
| Lactobacillus gasseri   | VBILacGas103493_0435 | Oligopeptide transport ATP-binding protein OppF TC 3.A.1.5.1                                                      |

Table S8

|                        |                      |                                                                                                      |
|------------------------|----------------------|------------------------------------------------------------------------------------------------------|
| Lactobacillus gasseri  | VBILacGas103493_1617 | Oligopeptide transport ATP-binding protein OppF TC 3.A.1.5.1                                         |
| Lactobacillus gasseri  | VBILacGas62225_0067  | Phosphate regulon sensor protein PhoR SphS EC 2.7.13.3                                               |
| Lactobacillus gasseri  | VBILacGas39627_1631  | Phosphonate ABC transporter ATP-binding protein TC 3.A.1.9.1                                         |
| Lactobacillus gasseri  | VBILacGas62225_0553  | Protein export cytoplasm protein SecA ATPase RNA helicase TC 3.A.5.1.1                               |
| Lactobacillus gasseri  | VBILacGas39627_0956  | Protein export cytoplasm protein SecA ATPase RNA helicase TC 3.A.5.1.1                               |
| Lactobacillus gasseri  | VBILacGas103492_0453 | Protein export cytoplasm protein SecA ATPase RNA helicase TC 3.A.5.1.1                               |
| Lactobacillus gasseri  | VBILacGas62225_0826  | Putrescine transport ATP-binding protein PotA TC 3.A.1.11.1                                          |
| Lactobacillus gasseri  | VBILacGas103492_0472 | Putrescine transport ATP-binding protein PotA TC 3.A.1.11.1                                          |
| Lactobacillus gasseri  | VBILacGas103493_1242 | Putrescine transport ATP-binding protein PotA TC 3.A.1.11.1                                          |
| Lactobacillus gasseri  | VBILacGas62225_0352  | Response regulators consisting of a CheY-like receiver domain and a winged-helix DNA-binding domain  |
| Lactobacillus gasseri  | VBILacGas62225_0403  | RNA polymerase sigma factor RpoD                                                                     |
| Lactobacillus gasseri  | VBILacGas62225_0276  | Sortase A 2C LPXTG specific                                                                          |
| Lactobacillus gasseri  | VBILacGas39627_0295  | Translation elongation factor Tu                                                                     |
| Lactobacillus gasseri  | VBILacGas103493_0518 | Transport ATP-binding protein CydC                                                                   |
| Lactobacillus gasseri  | VBILacGas62225_1724  | two-component system response regulator                                                              |
| Lactobacillus gasseri  | VBILacGas39627_0440  | Tyrosine-protein kinase EpsD EC 2.7.10.2                                                             |
| Lactobacillus gasseri  | VBILacGas62225_0538  | Tyrosine-protein kinase EpsD EC 2.7.10.2                                                             |
| Lactobacillus iners    | VBILacIne171003_0120 | 3-oxoacyl-acyl-carrier protein reductase EC 1.1.1.100                                                |
| Lactobacillus iners    | VBILacIne96327_1034  | ABC transporter 2C ATP-binding permease protein                                                      |
| Lactobacillus iners    | VBILacIne171003_0335 | Alcohol dehydrogenase EC 1.1.1.1 3B Acetaldehyde dehydrogenase EC 1.2.1.10                           |
| Lactobacillus iners    | VBILacIne170485_0556 | Asparagine synthetase glutamine-hydrolyzing EC 6.3.5.4                                               |
| Lactobacillus iners    | VBILacIne154546_0846 | ATP-dependent Clp protease 2C ATP-binding subunit ClpE                                               |
| Lactobacillus iners    | VBILacIne96327_0242  | ATP-dependent Clp protease ATP-binding subunit ClpA                                                  |
| Lactobacillus iners    | VBILacIne171003_0453 | ATP-dependent Clp protease ATP-binding subunit ClpA                                                  |
| Lactobacillus iners    | VBILacIne96327_0033  | ATP-dependent Clp protease ATP-binding subunit ClpA                                                  |
| Lactobacillus iners    | VBILacIne96327_0728  | ATP-dependent Clp protease ATP-binding subunit ClpA                                                  |
| Lactobacillus iners    | VBILacIne96327_0767  | Calcium-transporting ATPase EC 3.6.3.8                                                               |
| Lactobacillus iners    | VBILacIne170485_0582 | Cell envelope-associated transcriptional attenuator LytR-CpsA-Psr 2C subfamily F2 as in PMID19099556 |
| Lactobacillus iners    | VBILacIne154546_0100 | chologylglycine hydrolase                                                                            |
| Lactobacillus iners    | VBILacIne154546_0879 | chologylglycine hydrolase                                                                            |
| Lactobacillus iners    | VBILacIne96327_0489  | COG1272 Predicted membrane protein hemolysin III homolog                                             |
| Lactobacillus iners    | VBILacIne96327_0747  | Glutamate transport ATP-binding protein                                                              |
| Lactobacillus iners    | VBILacIne154546_0074 | Glycosyl transferase 2C family 2                                                                     |
| Lactobacillus iners    | VBILacIne96327_0243  | Hemolysins and related proteins containing CBS domains                                               |
| Lactobacillus iners    | VBILacIne96327_1002  | Lipid A export ATP-binding permease protein MsbA                                                     |
| Lactobacillus iners    | VBILacIne170485_0025 | Lipoate-protein ligase A                                                                             |
| Lactobacillus iners    | VBILacIne171003_0838 | Oligopeptide transport ATP-binding protein OppD TC 3.A.1.5.1                                         |
| Lactobacillus iners    | VBILacIne170485_0726 | Phosphate transport ATP-binding protein PstB TC 3.A.1.7.1                                            |
| Lactobacillus iners    | VBILacIne170485_1094 | Phosphoglucosamine mutase EC 5.4.2.10                                                                |
| Lactobacillus iners    | VBILacIne171003_0731 | Polysaccharide biosynthesis protein CpsMV                                                            |
| Lactobacillus iners    | VBILacIne171003_0145 | Polysaccharide biosynthesis protein CpsMV                                                            |
| Lactobacillus iners    | VBILacIne154546_0442 | Respiratory nitrate reductase beta chain EC 1.7.99.4                                                 |
| Lactobacillus iners    | VBILacIne96327_0507  | Translation elongation factor Tu                                                                     |
| Lactobacillus iners    | VBILacIne171003_0525 | Translation elongation factor Tu                                                                     |
| Lactobacillus iners    | VBILacIne96327_0721  | Two-component system histidine kinase                                                                |
| Lactobacillus iners    | VBILacIne154546_0717 | UDP-galactopyranose mutase EC 5.4.99.9                                                               |
| Lactobacillus iners    | VBILacIne171003_0894 | Undecaprenyl pyrophosphate synthetase EC 2.5.1.31                                                    |
| Lactobacillus jensenii | VBILacJen111417_0313 | ABC transporter ATP-binding protein                                                                  |
| Lactobacillus jensenii | VBILacJen111417_0115 | ABC transporter ATPase and permease components                                                       |
| Lactobacillus jensenii | VBILacJen111417_0335 | ABC transporter ATPase and permease components                                                       |
| Lactobacillus jensenii | VBILacJen15106_0651  | ABC transporter membrane-spanning permease - glutamine transport                                     |
| Lactobacillus jensenii | VBILacJen111417_0587 | ABC-type multidrug transport system 2C ATPase and permease components                                |
| Lactobacillus jensenii | VBILacJen15106_0758  | ABC-type polar amino acid transport system 2C ATPase component                                       |
| Lactobacillus jensenii | VBILacJen111417_1056 | Amino acid transport ATP-binding protein                                                             |
| Lactobacillus jensenii | VBILacJen111417_0370 | ATP synthase beta chain EC 3.6.3.14                                                                  |
| Lactobacillus jensenii | VBILacJen15106_0558  | ATP-dependent Clp protease ATP-binding subunit ClpA                                                  |
| Lactobacillus jensenii | VBILacJen42595_1007  | D-alanyl transfer protein DltB                                                                       |
| Lactobacillus jensenii | VBILacJen111417_1103 | dTDP-glucose 4 2C6-dehydratase EC 4.2.1.46                                                           |
| Lactobacillus jensenii | VBILacJen42595_1501  | Enolase EC 4.2.1.11                                                                                  |
| Lactobacillus jensenii | VBILacJen42595_1211  | Enolase EC 4.2.1.11                                                                                  |
| Lactobacillus jensenii | VBILacJen15106_0128  | FIG00746850 hypothetical protein                                                                     |
| Lactobacillus jensenii | VBILacJen111417_0758 | Heat shock protein 60 family chaperone GroEL                                                         |
| Lactobacillus jensenii | VBILacJen42595_1282  | Heat shock protein 60 family chaperone GroEL                                                         |
| Lactobacillus jensenii | VBILacJen34656_0250  | Heat shock protein 60 family chaperone GroEL                                                         |
| Lactobacillus jensenii | VBILacJen111417_0016 | Hemolysins and related proteins containing CBS domains                                               |
| Lactobacillus jensenii | VBILacJen34656_1334  | Hemolysins and related proteins containing CBS domains                                               |
| Lactobacillus jensenii | VBILacJen111417_1258 | Membrane protein involved in the export of O-antigen 2C teichoic acid lipoteichoic acids             |
| Lactobacillus jensenii | VBILacJen111417_0489 | Membrane protein involved in the export of O-antigen 2C teichoic acid lipoteichoic acids             |
| Lactobacillus jensenii | VBILacJen42595_0085  | Methionine ABC transporter ATP-binding protein                                                       |
| Lactobacillus jensenii | VBILacJen15106_0249  | Multiple sugar ABC transporter 2C ATP-binding protein                                                |
| Lactobacillus jensenii | VBILacJen34656_1177  | Phosphate transport ATP-binding protein PstB TC 3.A.1.7.1                                            |
| Lactobacillus jensenii | VBILacJen111417_0470 | Phosphoglucosamine mutase EC 5.4.2.10                                                                |
| Lactobacillus jensenii | VBILacJen111417_1471 | Phosphoglucosamine mutase EC 5.4.2.10 Phosphomannomutase EC 5.4.2.8                                  |
| Lactobacillus jensenii | VBILacJen15106_0047  | Protein export cytoplasm protein SecA ATPase RNA helicase TC 3.A.5.1.1                               |
| Lactobacillus jensenii | VBILacJen42595_1497  | Putative mannosyltransferase involved in polysaccharide biosynthesis                                 |
| Lactobacillus jensenii | VBILacJen42595_0655  | RNA polymerase sigma factor RpoD                                                                     |
| Lactobacillus jensenii | VBILacJen15106_0116  | Serine protease 2C DegP HtrA 2C do-like EC 3.4.21.-                                                  |
| Lactobacillus jensenii | VBILacJen42595_1171  | Two-component system histidine kinase                                                                |
| Lactobacillus jensenii | VBILacJen42595_1153  | Two-component system histidine kinase                                                                |

Table S8

|                              |                      |                                                                                                      |
|------------------------------|----------------------|------------------------------------------------------------------------------------------------------|
| Lactobacillus jensenii       | VBILacJen111417_1259 | Tyrosine-protein kinase EpsD EC 2.7.10.2                                                             |
| Lactobacillus jensenii       | VBILacJen15106_0113  | Undecaprenyl-phosphate N-acetylglucosaminyl 1-phosphate transferase EC 2.7.8.-                       |
| Lactobacillus johnsonii      | VBILacJoh137736_1249 | Amino acid transport ATP-binding protein                                                             |
| Lactobacillus johnsonii      | VBILacJoh137736_0701 | Asparagine synthetase glutamine-hydrolyzing EC 6.3.5.4                                               |
| Lactobacillus johnsonii      | VBILacJoh1832_1716   | Cell division trigger factor EC 5.2.1.8                                                              |
| Lactobacillus johnsonii      | VBILacJoh81045_1610  | Cell envelope-associated transcriptional attenuator LytR-CpsA-Psr 2C subfamily F2 as in PMID19099556 |
| Lactobacillus johnsonii      | VBILacJoh81045_0396  | D-alanine-polyphosphoribitol ligase subunit 1 EC 6.1.1.13                                            |
| Lactobacillus johnsonii      | VBILacJoh137736_0821 | D-alanyl transfer protein DltB                                                                       |
| Lactobacillus johnsonii      | VBILacJoh81045_0129  | D-alanyl transfer protein DltB                                                                       |
| Lactobacillus johnsonii      | VBILacJoh137736_0691 | Enolase EC 4.2.1.11                                                                                  |
| Lactobacillus johnsonii      | VBILacJoh1832_1024   | Enolase EC 4.2.1.11                                                                                  |
| Lactobacillus johnsonii      | VBILacJoh1832_0410   | Enolase EC 4.2.1.11                                                                                  |
| Lactobacillus johnsonii      | VBILacJoh1832_1841   | Fibronectin-binding protein                                                                          |
| Lactobacillus johnsonii      | VBILacJoh137736_1103 | Fibronectin-binding protein                                                                          |
| Lactobacillus johnsonii      | VBILacJoh81045_0027  | fructose response regulator of fruA and EII fructose mannose                                         |
| Lactobacillus johnsonii      | VBILacJoh81045_0876  | Glycosyltransferase                                                                                  |
| Lactobacillus johnsonii      | VBILacJoh1832_1677   | GTP pyrophosphokinase EC 2.7.6.5 2C pppGpp synthetase I                                              |
| Lactobacillus johnsonii      | VBILacJoh137736_1104 | Heat shock protein 60 family chaperone GroEL                                                         |
| Lactobacillus johnsonii      | VBILacJoh137736_1285 | Long-chain-fatty-acid-CoA ligase EC 6.2.1.3                                                          |
| Lactobacillus johnsonii      | VBILacJoh137736_1446 | Long-chain-fatty-acid-CoA ligase EC 6.2.1.3                                                          |
| Lactobacillus johnsonii      | VBILacJoh81045_0631  | Membrane protein involved in the export of O-antigen 2C teichoic acid lipoteichoic acids             |
| Lactobacillus johnsonii      | VBILacJoh1832_0608   | Methionine ABC transporter ATP-binding protein                                                       |
| Lactobacillus johnsonii      | VBILacJoh137736_0824 | Na <sup>+</sup> ABC transporter ATP-binding protein                                                  |
| Lactobacillus johnsonii      | VBILacJoh137736_0926 | Oligopeptide transport ATP-binding protein OppD TC 3.A.1.5.1                                         |
| Lactobacillus johnsonii      | VBILacJoh137736_1106 | Oligopeptide transport ATP-binding protein OppD TC 3.A.1.5.1                                         |
| Lactobacillus johnsonii      | VBILacJoh137736_1248 | Oligopeptide transport ATP-binding protein OppF TC 3.A.1.5.1                                         |
| Lactobacillus johnsonii      | VBILacJoh81045_0719  | Peptidyl-prolyl cis-trans isomerase EC 5.2.1.8                                                       |
| Lactobacillus johnsonii      | VBILacJoh137736_1494 | Phosphoglucosamine mutase EC 5.4.2.10 Phosphomannomutase EC 5.4.2.8                                  |
| Lactobacillus johnsonii      | VBILacJoh1832_1112   | Protein export cytoplasm protein SecA ATPase RNA helicase TC 3.A.5.1.1                               |
| Lactobacillus johnsonii      | VBILacJoh137736_1472 | Protein export cytoplasm protein SecA ATPase RNA helicase TC 3.A.5.1.1                               |
| Lactobacillus johnsonii      | VBILacJoh137736_0553 | putative bacteriocin ABC transporter                                                                 |
| Lactobacillus johnsonii      | VBILacJoh137736_0659 | Putative mannosyltransferase involved in polysaccharide biosynthesis                                 |
| Lactobacillus johnsonii      | VBILacJoh1832_1715   | RNA polymerase sigma factor RpoD                                                                     |
| Lactobacillus johnsonii      | VBILacJoh1832_1022   | Serine threonine protein kinase PrkC 2C regulator of stationary phase                                |
| Lactobacillus johnsonii      | VBILacJoh137736_1102 | Translation elongation factor Tu                                                                     |
| Lactobacillus johnsonii      | VBILacJoh81045_0002  | Two-component response regulator SA14-24                                                             |
| Lactobacillus johnsonii      | VBILacJoh1832_0349   | Two-component system histidine kinase                                                                |
| Lactobacillus johnsonii      | VBILacJoh81045_1232  | UDP-galactopyranose mutase EC 5.4.99.9                                                               |
| Lactobacillus johnsonii      | VBILacJoh1832_1550   | UDP-glucose 4-epimerase EC 5.1.3.2                                                                   |
| Lactobacillus johnsonii      | VBILacJoh137736_1656 | Zinc ABC transporter 2C ATP-binding protein ZnuC                                                     |
| Lactobacillus kisonensis     | VBILacKis163084_0974 | ABC transporter 2C ATP-binding protein EcsA                                                          |
| Lactobacillus kisonensis     | VBILacKis163084_0603 | ATP-dependent Clp protease ATP-binding subunit ClpA                                                  |
| Lactobacillus kisonensis     | VBILacKis163084_0160 | ATP-dependent Clp protease ATP-binding subunit ClpA                                                  |
| Lactobacillus kisonensis     | VBILacKis163084_2258 | Indole-3-glycerol phosphate synthase EC 4.1.1.48                                                     |
| Lactobacillus kisonensis     | VBILacKis163084_1324 | Indole-3-glycerol phosphate synthase EC 4.1.1.48                                                     |
| Lactobacillus kisonensis     | VBILacKis163084_2080 | Indole-3-glycerol phosphate synthase EC 4.1.1.48                                                     |
| Lactobacillus kisonensis     | VBILacKis163084_1334 | Indole-3-glycerol phosphate synthase EC 4.1.1.48                                                     |
| Lactobacillus kisonensis     | VBILacKis163084_2485 | Indole-3-glycerol phosphate synthase EC 4.1.1.48                                                     |
| Lactobacillus kisonensis     | VBILacKis163084_2987 | Indole-3-glycerol phosphate synthase EC 4.1.1.48                                                     |
| Lactobacillus kisonensis     | VBILacKis163084_2929 | Indole-3-glycerol phosphate synthase EC 4.1.1.48                                                     |
| Lactobacillus kisonensis     | VBILacKis163084_1807 | Indole-3-glycerol phosphate synthase EC 4.1.1.48                                                     |
| Lactobacillus kisonensis     | VBILacKis163084_2450 | Indole-3-glycerol phosphate synthase EC 4.1.1.48                                                     |
| Lactobacillus kisonensis     | VBILacKis163084_2634 | Indole-3-glycerol phosphate synthase EC 4.1.1.48                                                     |
| Lactobacillus kisonensis     | VBILacKis163084_0106 | Methionine ABC transporter ATP-binding protein                                                       |
| Lactobacillus kisonensis     | VBILacKis163084_0011 | Serine threonine protein kinase PrkC 2C regulator of stationary phase                                |
| Lactobacillus kisonensis     | VBILacKis163084_1248 | Sortase A 2C LPXTG specific                                                                          |
| Lactobacillus kisonensis     | VBILacKis163084_0320 | Undecaprenyl pyrophosphate synthetase EC 2.5.1.31                                                    |
| Lactobacillus oris           | VBILacOri177432_1519 | ABC transporter 2C ATP-binding permease protein                                                      |
| Lactobacillus oris           | VBILacOri169381_1182 | cation-transporting ATPase 2C E1-E2 family                                                           |
| Lactobacillus oris           | VBILacOri169381_1259 | Enolase EC 4.2.1.11                                                                                  |
| Lactobacillus oris           | VBILacOri177432_0574 | Glutamate transport ATP-binding protein                                                              |
| Lactobacillus oris           | VBILacOri177432_0077 | hypothetical protein                                                                                 |
| Lactobacillus oris           | VBILacOri169381_1990 | hypothetical protein                                                                                 |
| Lactobacillus oris           | VBILacOri169381_0064 | Indole-3-glycerol phosphate synthase EC 4.1.1.48                                                     |
| Lactobacillus oris           | VBILacOri169381_1569 | Ornithine carbamoyltransferase EC 2.1.3.3                                                            |
| Lactobacillus oris           | VBILacOri169381_0374 | RNA polymerase sigma factor RpoD                                                                     |
| Lactobacillus oris           | VBILacOri177432_1375 | Serine threonine protein kinase PrkC 2C regulator of stationary phase                                |
| Lactobacillus oris           | VBILacOri169381_0694 | UDP-glucose 4-epimerase EC 5.1.3.2                                                                   |
| Lactobacillus paracasei      | VBILacPar51859_1587  | ABC transporter ATPase component                                                                     |
| Lactobacillus paracasei      | VBILacPar51859_2647  | Fibronectin-binding protein                                                                          |
| Lactobacillus paracasei      | VBILacPar66337_0966  | Glycosyltransferases involved in cell wall biogenesis                                                |
| Lactobacillus paracasei      | VBILacPar51859_0508  | Phosphatidate cytidyltransferase EC 2.7.7.41                                                         |
| Lactobacillus paracasei      | VBILacPar66337_0892  | Polysaccharide biosynthesis protein CpsMV                                                            |
| Lactobacillus paracasei      | VBILacPar51859_0545  | RNA polymerase sigma factor RpoD                                                                     |
| Lactobacillus parafarraginis | VBILacPar162065_0995 | Beta-1 2C3-glucosyltransferase                                                                       |
| Lactobacillus parafarraginis | VBILacPar162065_2748 | Calcium-transporting ATPase EC 3.6.3.8                                                               |
| Lactobacillus parafarraginis | VBILacPar162065_2601 | Protein export cytoplasm protein SecA ATPase RNA helicase TC 3.A.5.1.1                               |
| Lactobacillus parafarraginis | VBILacPar162065_1522 | Putrescine transport ATP-binding protein PotA TC 3.A.1.11.1                                          |
| Lactobacillus parafarraginis | VBILacPar162065_1655 | UDP-N-acetylenolpyruvoylglucosamine reductase EC 1.1.1.158                                           |

Table S8

|                              |                      |                                                                                                          |
|------------------------------|----------------------|----------------------------------------------------------------------------------------------------------|
| Lactobacillus parafarraginis | VBILacPar162065_1288 | Undecaprenyl-phosphate galactosephosphotransferase EC 2.7.8.6                                            |
| Lactobacillus pentosus       | VBILacPen232155_2393 | ABC transporter ATPase and permease components                                                           |
| Lactobacillus pentosus       | VBILacPen232155_1889 | ABC transporter ATPase component                                                                         |
| Lactobacillus pentosus       | VBILacPen232155_2262 | ABC-type multidrug transport system 2C ATPase and permease components                                    |
| Lactobacillus pentosus       | VBILacPen232155_0986 | ATP-dependent Clp protease ATP-binding subunit ClpA                                                      |
| Lactobacillus pentosus       | VBILacPen232155_0228 | ATP-dependent Clp protease ATP-binding subunit ClpA                                                      |
| Lactobacillus pentosus       | VBILacPen232155_0186 | ATP-dependent Clp protease ATP-binding subunit ClpA                                                      |
| Lactobacillus pentosus       | VBILacPen232155_1788 | Enolase EC 4.2.1.11                                                                                      |
| Lactobacillus pentosus       | VBILacPen232155_2573 | FIG00745466 hypothetical protein                                                                         |
| Lactobacillus pentosus       | VBILacPen232155_1295 | Glutamate transport ATP-binding protein                                                                  |
| Lactobacillus pentosus       | VBILacPen232155_0171 | hypothetical protein                                                                                     |
| Lactobacillus pentosus       | VBILacPen232155_1622 | Lipid A export ATP-binding permease protein MsbA                                                         |
| Lactobacillus pentosus       | VBILacPen232155_1866 | Membrane protein involved in the export of O-antigen 2C teichoic acid lipoteichoic acids                 |
| Lactobacillus pentosus       | VBILacPen232155_1500 | Mg2+ transport ATPase 2C P-type EC 3.6.3.2                                                               |
| Lactobacillus pentosus       | VBILacPen232155_1087 | Protein export cytoplasm protein SecA2 ATPase RNA helicase TC 3.A.5.1.1                                  |
| Lactobacillus pentosus       | VBILacPen232155_0144 | UDP-glucose 4-epimerase EC 5.1.3.2                                                                       |
| Lactobacillus plantarum      | VBILacPla68346_1031  | ABC-type multidrug protein lipid transport system 2C ATPase component                                    |
| Lactobacillus plantarum      | VBILacPla14617_0236  | Alcohol dehydrogenase EC 1.1.1.1 3B Acetaldehyde dehydrogenase EC 1.2.1.10                               |
| Lactobacillus plantarum      | VBILacPla68346_2011  | Alpha-L-Rha alpha-1 2C2-L-rhamnosyltransferase alpha-L-Rha alpha-1 2C3-L-rhamnosyltransferase EC 2.4.1.- |
| Lactobacillus plantarum      | VBILacPla68346_1681  | Asparagine synthetase glutamine-hydrolyzing EC 6.3.5.4                                                   |
| Lactobacillus plantarum      | VBILacPla68346_1651  | ATP synthase beta chain EC 3.6.3.14                                                                      |
| Lactobacillus plantarum      | VBILacPla14617_1119  | ATP synthase beta chain EC 3.6.3.14                                                                      |
| Lactobacillus plantarum      | VBILacPla14617_1369  | ATP-dependent Clp protease ATP-binding subunit ClpA                                                      |
| Lactobacillus plantarum      | VBILacPla14617_1544  | ATP-dependent Clp protease ATP-binding subunit ClpA                                                      |
| Lactobacillus plantarum      | VBILacPla14617_1395  | ATP-dependent Clp protease ATP-binding subunit ClpA                                                      |
| Lactobacillus plantarum      | VBILacPla68346_1136  | CDP-glycerolpolyglycerophosphate glycerophosphotransferase EC 2.7.8.12                                   |
| Lactobacillus plantarum      | VBILacPla14617_2276  | Cell division trigger factor EC 5.2.1.8                                                                  |
| Lactobacillus plantarum      | VBILacPla68346_2738  | Dolichol-phosphate mannosyltransferase EC 2.4.1.83 in lipid-linked oligosaccharide synthesis cluster     |
| Lactobacillus plantarum      | VBILacPla14617_1923  | dTDP-glucose 4 2C6-dehydratase EC 4.2.1.46                                                               |
| Lactobacillus plantarum      | VBILacPla14617_1941  | Enolase EC 4.2.1.11                                                                                      |
| Lactobacillus plantarum      | VBILacPla68346_0279  | Ferrochelatase 2C protoheme ferro-lyase EC 4.99.1.1                                                      |
| Lactobacillus plantarum      | VBILacPla68346_0631  | Glycerol-3-phosphate ABC transporter 2C ATP-binding protein UgpC TC 3.A.1.1.3                            |
| Lactobacillus plantarum      | VBILacPla14617_2791  | Heat shock protein 60 family chaperone GroEL                                                             |
| Lactobacillus plantarum      | VBILacPla14617_1135  | Lipid A export ATP-binding permease protein MsbA                                                         |
| Lactobacillus plantarum      | VBILacPla14617_2105  | Lipoate-protein ligase A                                                                                 |
| Lactobacillus plantarum      | VBILacPla14617_0732  | N-acetylmannosaminyltransferase EC 2.4.1.187                                                             |
| Lactobacillus plantarum      | VBILacPla14617_2563  | Oligopeptide ABC transporter 2C periplasmic oligopeptide-binding protein OppA TC 3.A.1.5.1               |
| Lactobacillus plantarum      | VBILacPla68346_0054  | Oligopeptide ABC transporter 2C periplasmic oligopeptide-binding protein OppA TC 3.A.1.5.1               |
| Lactobacillus plantarum      | VBILacPla68346_1353  | Phosphatidate cytidyltransferase EC 2.7.7.41                                                             |
| Lactobacillus plantarum      | VBILacPla68346_1720  | Phosphoglucosamine mutase EC 5.4.2.10                                                                    |
| Lactobacillus plantarum      | VBILacPla68346_2032  | S-ribosylhomocysteine lyase EC 4.4.1.21 Autoinducer-2 production protein LuxS                            |
| Lactobacillus plantarum      | VBILacPla68346_0654  | Serine protease 2C DegP HtrA 2C do-like EC 3.4.21.-                                                      |
| Lactobacillus plantarum      | VBILacPla68346_1072  | Transport ATP-binding protein CydD                                                                       |
| Lactobacillus plantarum      | VBILacPla68346_2929  | Two component system histidine kinase EC 2.7.3.-                                                         |
| Lactobacillus plantarum      | VBILacPla14617_1090  | Two-component system histidine kinase                                                                    |
| Lactobacillus plantarum      | VBILacPla14617_1123  | wbcl                                                                                                     |
| Lactobacillus plantarum      | VBILacPla14617_1100  | YbbL ABC transporter ATP-binding protein                                                                 |
| Lactobacillus reuteri        | VBILacReu111271_1426 | 3-oxoacyl-acyl-carrier protein reductase EC 1.1.1.100                                                    |
| Lactobacillus reuteri        | VBILacReu127513_1208 | 3-oxoacyl-acyl-carrier-protein synthase 2C KASII EC 2.3.1.41                                             |
| Lactobacillus reuteri        | VBILacReu87937_1341  | ABC transporter ATP-binding protein YvcR                                                                 |
| Lactobacillus reuteri        | VBILacReu127513_1383 | Alcohol dehydrogenase EC 1.1.1.1 3B Acetaldehyde dehydrogenase EC 1.2.1.10                               |
| Lactobacillus reuteri        | VBILacReu127513_1295 | Alcohol dehydrogenase EC 1.1.1.1 3B Acetaldehyde dehydrogenase EC 1.2.1.10                               |
| Lactobacillus reuteri        | VBILacReu111271_0037 | Asparagine synthetase glutamine-hydrolyzing EC 6.3.5.4                                                   |
| Lactobacillus reuteri        | VBILacReu111271_1217 | Asparagine synthetase glutamine-hydrolyzing EC 6.3.5.4                                                   |
| Lactobacillus reuteri        | VBILacReu87937_1083  | ATP synthase alpha chain EC 3.6.3.14                                                                     |
| Lactobacillus reuteri        | VBILacReu112121_1135 | ATP synthase alpha chain EC 3.6.3.14                                                                     |
| Lactobacillus reuteri        | VBILacReu111271_1100 | ATP synthase beta chain EC 3.6.3.14                                                                      |
| Lactobacillus reuteri        | VBILacReu87937_1303  | ATP synthase beta chain EC 3.6.3.14                                                                      |
| Lactobacillus reuteri        | VBILacReu127513_1219 | capsular polysaccharide biosynthesis protein                                                             |
| Lactobacillus reuteri        | VBILacReu127513_1362 | Cell division transporter 2C ATP-binding protein FtsE TC 3.A.5.1.1                                       |
| Lactobacillus reuteri        | VBILacReu87937_0429  | Choline binding protein A                                                                                |
| Lactobacillus reuteri        | VBILacReu87937_0438  | Choline binding protein A                                                                                |
| Lactobacillus reuteri        | VBILacReu87937_0421  | Choline binding protein A                                                                                |
| Lactobacillus reuteri        | VBILacReu87937_0666  | Choline binding protein A                                                                                |
| Lactobacillus reuteri        | VBILacReu87937_0667  | Choline binding protein A                                                                                |
| Lactobacillus reuteri        | VBILacReu87937_0906  | Choline binding protein A                                                                                |
| Lactobacillus reuteri        | VBILacReu87937_0483  | Choline binding protein A                                                                                |
| Lactobacillus reuteri        | VBILacReu112121_0094 | ClpB protein                                                                                             |
| Lactobacillus reuteri        | VBILacReu127513_0927 | COG1272 Predicted membrane protein hemolysin III homolog                                                 |
| Lactobacillus reuteri        | VBILacReu87937_1677  | conjugation protein                                                                                      |
| Lactobacillus reuteri        | VBILacReu87937_0135  | D-glycero-D-manno-heptose 1 2C7-bisphosphate phosphatase EC 3.1.1.-                                      |
| Lactobacillus reuteri        | VBILacReu111271_1566 | Diaminopimelate decarboxylase EC 4.1.1.20                                                                |
| Lactobacillus reuteri        | VBILacReu112121_0908 | Dolichol-phosphate mannosyltransferase EC 2.4.1.83 in lipid-linked oligosaccharide synthesis cluster     |
| Lactobacillus reuteri        | VBILacReu111271_1509 | Dolichol-phosphate mannosyltransferase EC 2.4.1.83 in lipid-linked oligosaccharide synthesis cluster     |
| Lactobacillus reuteri        | VBILacReu127513_1634 | Enolase EC 4.2.1.11                                                                                      |
| Lactobacillus reuteri        | VBILacReu111271_0101 | EpsX                                                                                                     |
| Lactobacillus reuteri        | VBILacReu111271_0404 | Exopolysaccharide biosynthesis glycosyltransferase EpsF EC 2.4.1.-                                       |
| Lactobacillus reuteri        | VBILacReu112121_1170 | Ferrous iron transport protein B                                                                         |
| Lactobacillus reuteri        | VBILacReu112121_0024 | Glucose-1-phosphate thymidyltransferase EC 2.7.7.24                                                      |

Table S8

|                         |                      |                                                                                                                      |
|-------------------------|----------------------|----------------------------------------------------------------------------------------------------------------------|
| Lactobacillus reuteri   | VBILacReu127513_0107 | Glutamine synthetase type I EC 6.3.1.2                                                                               |
| Lactobacillus reuteri   | VBILacReu112121_0518 | Histidine protein kinase 3B sensor protein EC 2.7.3.-                                                                |
| Lactobacillus reuteri   | VBILacReu127513_0117 | hypothetical protein                                                                                                 |
| Lactobacillus reuteri   | VBILacReu112121_0535 | hypothetical protein                                                                                                 |
| Lactobacillus reuteri   | VBILacReu127513_1142 | hypothetical protein                                                                                                 |
| Lactobacillus reuteri   | VBILacReu112121_1899 | Lead 2C cadmium 2C zinc and mercury transporting ATPase EC 3.6.3.3 EC 3.6.3.5 3B Copper-translocating P-type ATP;    |
| Lactobacillus reuteri   | VBILacReu127513_1150 | Malonyl CoA-acyl carrier protein transacylase EC 2.3.1.39                                                            |
| Lactobacillus reuteri   | VBILacReu111271_0671 | Malonyl CoA-acyl carrier protein transacylase EC 2.3.1.39                                                            |
| Lactobacillus reuteri   | VBILacReu111271_0741 | Manganese ABC transporter 2C ATP-binding protein SitB                                                                |
| Lactobacillus reuteri   | VBILacReu127513_1480 | Manganese superoxide dismutase EC 1.15.1.1                                                                           |
| Lactobacillus reuteri   | VBILacReu111271_0132 | Manganese-dependent protein-tyrosine phosphatase EC 3.1.3.48                                                         |
| Lactobacillus reuteri   | VBILacReu112121_1211 | Methionine ABC transporter ATP-binding protein                                                                       |
| Lactobacillus reuteri   | VBILacReu112121_1292 | Multiple sugar ABC transporter 2C ATP-binding protein                                                                |
| Lactobacillus reuteri   | VBILacReu112121_1476 | Oligopeptide ABC transporter 2C periplasmic oligopeptide-binding protein OppA TC 3.A.1.5.1                           |
| Lactobacillus reuteri   | VBILacReu112121_1481 | Oligopeptide ABC transporter 2C periplasmic oligopeptide-binding protein OppA TC 3.A.1.5.1                           |
| Lactobacillus reuteri   | VBILacReu112121_1240 | Ornithine carbamoyltransferase EC 2.1.3.3                                                                            |
| Lactobacillus reuteri   | VBILacReu87937_1403  | Osmosensitive K+ channel histidine kinase KdpD EC 2.7.3.-                                                            |
| Lactobacillus reuteri   | VBILacReu111271_0763 | Phosphate transport ATP-binding protein PstB TC 3.A.1.7.1                                                            |
| Lactobacillus reuteri   | VBILacReu112121_1150 | Phosphoheptose isomerase EC 5.3.1.-                                                                                  |
| Lactobacillus reuteri   | VBILacReu87937_0364  | Phosphomannomutase EC 5.4.2.8                                                                                        |
| Lactobacillus reuteri   | VBILacReu111271_1914 | Protein export cytoplasm protein SecA ATPase RNA helicase TC 3.A.5.1.1                                               |
| Lactobacillus reuteri   | VBILacReu87937_1875  | putative ATP-dependent Clp proteinase ATP-binding subunit                                                            |
| Lactobacillus reuteri   | VBILacReu112121_1824 | Putrescine transport ATP-binding protein PotA TC 3.A.1.11.1                                                          |
| Lactobacillus reuteri   | VBILacReu127513_0690 | RNA polymerase sigma factor RpoD                                                                                     |
| Lactobacillus reuteri   | VBILacReu111271_0433 | S-ribosylhomocysteine lyase EC 4.4.1.21 Autoinducer-2 production protein LuxS                                        |
| Lactobacillus reuteri   | VBILacReu127513_1256 | Serine protease 2C DegP HtrA 2C do-like EC 3.4.21.-                                                                  |
| Lactobacillus reuteri   | VBILacReu111271_0442 | Teichoic acid export ATP-binding protein TagH EC 3.6.3.40                                                            |
| Lactobacillus reuteri   | VBILacReu112121_0549 | Teichoic acid export ATP-binding protein TagH EC 3.6.3.40                                                            |
| Lactobacillus reuteri   | VBILacReu111271_0750 | Two component system histidine kinase EC 2.7.3.-                                                                     |
| Lactobacillus reuteri   | VBILacReu112121_1207 | two-component response regulator                                                                                     |
| Lactobacillus reuteri   | VBILacReu112121_0533 | UDP-galactopyranose mutase EC 5.4.99.9                                                                               |
| Lactobacillus reuteri   | VBILacReu112121_2134 | UDP-N-acetylenolpyruvoylglucosamine reductase EC 1.1.1.158                                                           |
| Lactobacillus reuteri   | VBILacReu111271_0401 | Undecaprenyl-phosphate galactosephosphotransferase EC 2.7.8.6                                                        |
| Lactobacillus reuteri   | VBILacReu87937_1752  | Undecaprenyl-phosphate galactosephosphotransferase EC 2.7.8.6                                                        |
| Lactobacillus reuteri   | VBILacReu112121_1441 | V-type ATP synthase subunit A EC 3.6.3.14                                                                            |
| Lactobacillus reuteri   | VBILacReu112121_1727 | Vitamin B12 ABC transporter 2C permease component BtuC                                                               |
| Lactobacillus rhamnosus | VBILacRha123537_1746 | 3-oxoacyl-acyl-carrier-protein synthase 2C KASII EC 2.3.1.41                                                         |
| Lactobacillus rhamnosus | VBILacRha3627_0467   | ABC transporter 2C ATP-binding protein                                                                               |
| Lactobacillus rhamnosus | VBILacRha3627_1823   | ABC transporter ATP-binding protein                                                                                  |
| Lactobacillus rhamnosus | VBILacRha3627_1714   | ABC-type multidrug protein lipid transport system 2C ATPase component                                                |
| Lactobacillus rhamnosus | VBILacRha3627_0398   | ABC-type uncharacterized transport system 2C ATPase component                                                        |
| Lactobacillus rhamnosus | VBILacRha123537_2411 | Alkyl hydroperoxide reductase protein C EC 1.6.4.-                                                                   |
| Lactobacillus rhamnosus | VBILacRha123537_2406 | ATP synthase alpha chain EC 3.6.3.14                                                                                 |
| Lactobacillus rhamnosus | VBILacRha3627_1701   | ATP synthase beta chain EC 3.6.3.14                                                                                  |
| Lactobacillus rhamnosus | VBILacRha123537_2212 | Cation transport ATPase                                                                                              |
| Lactobacillus rhamnosus | VBILacRha58455_1351  | Cell envelope-associated transcriptional attenuator LytR-CpsA-Psr 2C subfamily F2 as in PMID19099556                 |
| Lactobacillus rhamnosus | VBILacRha3627_2089   | Cyclopropane-fatty-acyl-phospholipid synthase EC 2.1.1.79                                                            |
| Lactobacillus rhamnosus | VBILacRha2892_1929   | Dolichol-phosphate mannosyltransferase EC 2.4.1.83 in lipid-linked oligosaccharide synthesis cluster                 |
| Lactobacillus rhamnosus | VBILacRha58455_2556  | Enolase EC 4.2.1.11                                                                                                  |
| Lactobacillus rhamnosus | VBILacRha2892_1930   | Enolase EC 4.2.1.11                                                                                                  |
| Lactobacillus rhamnosus | VBILacRha58455_1025  | Enolase EC 4.2.1.11                                                                                                  |
| Lactobacillus rhamnosus | VBILacRha58455_1881  | Fibronectin fibrinogen-binding protein                                                                               |
| Lactobacillus rhamnosus | VBILacRha58455_1703  | FIG00750130 hypothetical protein                                                                                     |
| Lactobacillus rhamnosus | VBILacRha123537_2769 | Glucose-1-phosphate thymidyltransferase EC 2.7.7.24                                                                  |
| Lactobacillus rhamnosus | VBILacRha58455_1716  | Glycerol-3-phosphate ABC transporter 2C ATP-binding protein UgpC TC 3.A.1.1.3                                        |
| Lactobacillus rhamnosus | VBILacRha58455_1884  | Glycosyltransferase                                                                                                  |
| Lactobacillus rhamnosus | VBILacRha123537_1260 | glycosyltransferase 2C group 2 family protein                                                                        |
| Lactobacillus rhamnosus | VBILacRha58455_0437  | Glycosyltransferase EC 2.4.1.-                                                                                       |
| Lactobacillus rhamnosus | VBILacRha58455_1788  | GTP pyrophosphokinase EC 2.7.6.5 2C pppGpp synthetase I                                                              |
| Lactobacillus rhamnosus | VBILacRha123537_0875 | Hemolysins and related proteins containing CBS domains                                                               |
| Lactobacillus rhamnosus | VBILacRha123537_2397 | hypothetical protein                                                                                                 |
| Lactobacillus rhamnosus | VBILacRha58455_1909  | Lipid A export ATP-binding permease protein MsbA                                                                     |
| Lactobacillus rhamnosus | VBILacRha3627_1922   | Lipid A export ATP-binding permease protein MsbA                                                                     |
| Lactobacillus rhamnosus | VBILacRha2892_0571   | Maltose maltodextrin transport ATP-binding protein MalK EC 3.6.3.19 3B Multiple sugar ABC transporter 2C ATP-binding |
| Lactobacillus rhamnosus | VBILacRha3627_0940   | Maltose operon transcriptional repressor MalR 2C LacI family                                                         |
| Lactobacillus rhamnosus | VBILacRha3627_2549   | Membrane protein involved in the export of O-antigen 2C teichoic acid lipoteichoic acids                             |
| Lactobacillus rhamnosus | VBILacRha123537_0806 | Methionine biosynthesis and transport regulator MtaR 2C LysR family                                                  |
| Lactobacillus rhamnosus | VBILacRha123537_2413 | NAD-dependent glyceraldehyde-3-phosphate dehydrogenase EC 1.2.1.12                                                   |
| Lactobacillus rhamnosus | VBILacRha3627_1324   | Nucleoside 5-triphosphatase RdgB dHATP 2C dITP 2C XTP-specific EC 3.6.1.15                                           |
| Lactobacillus rhamnosus | VBILacRha2892_2631   | Osmotically activated L-carnitine choline ABC transporter 2C ATP-binding protein OpuCA                               |
| Lactobacillus rhamnosus | VBILacRha2892_0990   | Phosphate transport ATP-binding protein PstB TC 3.A.1.7.1                                                            |
| Lactobacillus rhamnosus | VBILacRha58455_2072  | Phosphoglucomutase EC 5.4.2.2                                                                                        |
| Lactobacillus rhamnosus | VBILacRha123537_2402 | Phosphoglucoamine mutase EC 5.4.2.10                                                                                 |
| Lactobacillus rhamnosus | VBILacRha58455_1264  | Phosphoglucoamine mutase EC 5.4.2.10                                                                                 |
| Lactobacillus rhamnosus | VBILacRha2892_0857   | Phosphonate ABC transporter ATP-binding protein TC 3.A.1.9.1                                                         |
| Lactobacillus rhamnosus | VBILacRha58455_0633  | predicted glycosyltransferase                                                                                        |
| Lactobacillus rhamnosus | VBILacRha123537_2415 | Protein export cytoplasm protein SecA ATPase RNA helicase TC 3.A.5.1.1                                               |
| Lactobacillus rhamnosus | VBILacRha123537_0060 | putative ATP-dependent Clp proteinase ATP-binding subunit                                                            |
| Lactobacillus rhamnosus | VBILacRha3627_2122   | Putrescine transport ATP-binding protein PotA TC 3.A.1.11.1                                                          |

Table S8

|                          |                      |                                                                                                      |
|--------------------------|----------------------|------------------------------------------------------------------------------------------------------|
| Lactobacillus rhamnosus  | VBILacRha58455_2040  | Putrescine transport ATP-binding protein PotA TC 3.A.1.11.1                                          |
| Lactobacillus rhamnosus  | VBILacRha123537_0307 | Selenocysteine-specific translation elongation factor                                                |
| Lactobacillus rhamnosus  | VBILacRha58455_1995  | Serine protease 2C DegP HtrA 2C do-like EC 3.4.21.-                                                  |
| Lactobacillus rhamnosus  | VBILacRha3627_2126   | Serine protease 2C DegP HtrA 2C do-like EC 3.4.21.-                                                  |
| Lactobacillus rhamnosus  | VBILacRha123537_0929 | Translation elongation factor Tu                                                                     |
| Lactobacillus rhamnosus  | VBILacRha123537_2505 | Transport ATP-binding protein CydD                                                                   |
| Lactobacillus rhamnosus  | VBILacRha3627_0763   | Two-component response regulator SA14-24                                                             |
| Lactobacillus rhamnosus  | VBILacRha3627_2415   | UDP-galactopyranose mutase EC 5.4.99.9                                                               |
| Lactobacillus rhamnosus  | VBILacRha58455_0936  | UDP-galactopyranose mutase EC 5.4.99.9                                                               |
| Lactobacillus rhamnosus  | VBILacRha2892_0625   | Undecaprenyl pyrophosphate synthetase EC 2.5.1.31                                                    |
| Lactobacillus rhamnosus  | VBILacRha123537_1537 | Undecaprenyl-phosphate galactosephosphotransferase EC 2.7.8.6                                        |
| Lactobacillus salivarius | VBILacSal150030_1352 | ABC transporter 2C ATP-binding and permease protein                                                  |
| Lactobacillus salivarius | VBILacSal150030_1404 | ABC-type antimicrobial peptide transport system 2C ATPase component                                  |
| Lactobacillus salivarius | VBILacSal150030_0725 | ABC-type multidrug transport system 2C ATPase component                                              |
| Lactobacillus salivarius | VBILacSal202740_0196 | Alcohol dehydrogenase EC 1.1.1.1                                                                     |
| Lactobacillus salivarius | VBILacSal82003_0274  | Alkyl hydroperoxide reductase protein C EC 1.6.4.-                                                   |
| Lactobacillus salivarius | VBILacSal82003_0859  | ATP-dependent Clp protease ATP-binding subunit ClpA                                                  |
| Lactobacillus salivarius | VBILacSal43464_0386  | ATP-dependent Clp protease ATP-binding subunit ClpA                                                  |
| Lactobacillus salivarius | VBILacSal194107_1250 | ATP-dependent Clp protease ATP-binding subunit ClpA                                                  |
| Lactobacillus salivarius | VBILacSal150030_0363 | ATP-dependent Clp protease ATP-binding subunit ClpA                                                  |
| Lactobacillus salivarius | VBILacSal82003_1438  | ATP-dependent protease ATP-binding subunit clpL                                                      |
| Lactobacillus salivarius | VBILacSal194107_0533 | ATPase component of general energizing module of ECF transporters                                    |
| Lactobacillus salivarius | VBILacSal43464_0252  | Cation transport ATPase                                                                              |
| Lactobacillus salivarius | VBILacSal82003_0047  | Cell division trigger factor EC 5.2.1.8                                                              |
| Lactobacillus salivarius | VBILacSal82003_1274  | Cell envelope-associated transcriptional attenuator LytR-CpsA-Psr 2C subfamily F2 as in PMID19099556 |
| Lactobacillus salivarius | VBILacSal164140_1694 | Choloylglycine hydrolase EC 3.5.1.24                                                                 |
| Lactobacillus salivarius | VBILacSal150030_1885 | Cyclopropane-fatty-acyl-phospholipid synthase EC 2.1.1.79                                            |
| Lactobacillus salivarius | VBILacSal202740_0804 | Cyclopropane-fatty-acyl-phospholipid synthase EC 2.1.1.79                                            |
| Lactobacillus salivarius | VBILacSal43464_1637  | D-alanine-polyphosphoribitol ligase subunit 1 EC 6.1.1.13                                            |
| Lactobacillus salivarius | VBILacSal43464_1060  | Diaminopimelate decarboxylase EC 4.1.1.20                                                            |
| Lactobacillus salivarius | VBILacSal150030_0080 | dTDP-glucose 4 2C6-dehydratase EC 4.2.1.46                                                           |
| Lactobacillus salivarius | VBILacSal43464_1560  | dTDP-glucose 4 2C6-dehydratase EC 4.2.1.46                                                           |
| Lactobacillus salivarius | VBILacSal194107_1282 | dTDP-glucose 4 2C6-dehydratase EC 4.2.1.46                                                           |
| Lactobacillus salivarius | VBILacSal194107_0236 | dTDP-glucose 4 2C6-dehydratase EC 4.2.1.46                                                           |
| Lactobacillus salivarius | VBILacSal194107_0742 | dTDP-glucose 4 2C6-dehydratase EC 4.2.1.46                                                           |
| Lactobacillus salivarius | VBILacSal150030_2090 | Enolase EC 4.2.1.11                                                                                  |
| Lactobacillus salivarius | VBILacSal202740_1503 | Fibronectin-binding protein                                                                          |
| Lactobacillus salivarius | VBILacSal202740_0040 | FIG00743683 hypothetical protein                                                                     |
| Lactobacillus salivarius | VBILacSal194107_0674 | FIG00745580 hypothetical protein                                                                     |
| Lactobacillus salivarius | VBILacSal150030_1364 | FIG00747311 hypothetical protein                                                                     |
| Lactobacillus salivarius | VBILacSal150030_0596 | FIG00750130 hypothetical protein                                                                     |
| Lactobacillus salivarius | VBILacSal202740_1286 | FIG00754934 hypothetical protein                                                                     |
| Lactobacillus salivarius | VBILacSal43464_0282  | Glucose 1-dehydrogenase EC 1.1.1.47                                                                  |
| Lactobacillus salivarius | VBILacSal194107_1484 | Glucose-1-phosphate thymidyltransferase EC 2.7.7.24                                                  |
| Lactobacillus salivarius | VBILacSal82003_0877  | Glutamate transport ATP-binding protein                                                              |
| Lactobacillus salivarius | VBILacSal194107_0545 | Glutamine ABC transporter 2C periplasmic glutamine-binding protein TC 3.A.1.3.2                      |
| Lactobacillus salivarius | VBILacSal202740_0694 | Glutamine transport ATP-binding protein GlnQ TC 3.A.1.3.2                                            |
| Lactobacillus salivarius | VBILacSal150030_1679 | Glutamine transport ATP-binding protein GlnQ TC 3.A.1.3.2                                            |
| Lactobacillus salivarius | VBILacSal82003_0949  | glycosyltransferase family 2                                                                         |
| Lactobacillus salivarius | VBILacSal164140_1687 | GTP pyrophosphokinase EC 2.7.6.5 2C pppGpp synthetase I                                              |
| Lactobacillus salivarius | VBILacSal150030_1007 | GTP pyrophosphokinase EC 2.7.6.5 2C pppGpp synthetase I                                              |
| Lactobacillus salivarius | VBILacSal202740_1361 | GTP pyrophosphokinase EC 2.7.6.5 2C pppGpp synthetase I                                              |
| Lactobacillus salivarius | VBILacSal43464_1667  | Heat shock protein 60 family chaperone GroEL                                                         |
| Lactobacillus salivarius | VBILacSal43464_0986  | Heat shock protein 60 family chaperone GroEL                                                         |
| Lactobacillus salivarius | VBILacSal82003_1499  | Heat shock protein 60 family chaperone GroEL                                                         |
| Lactobacillus salivarius | VBILacSal194107_1779 | Lipid A export ATP-binding permease protein MsbA                                                     |
| Lactobacillus salivarius | VBILacSal82003_1581  | Lipid A export ATP-binding permease protein MsbA                                                     |
| Lactobacillus salivarius | VBILacSal150030_1338 | Lipid A export ATP-binding permease protein MsbA                                                     |
| Lactobacillus salivarius | VBILacSal82003_0275  | Mannosyl-glycoprotein endo-beta-N-acetylglucosamidase                                                |
| Lactobacillus salivarius | VBILacSal202740_1101 | Methionine ABC transporter ATP-binding protein                                                       |
| Lactobacillus salivarius | VBILacSal150030_1367 | Multiple sugar ABC transporter 2C ATP-binding protein                                                |
| Lactobacillus salivarius | VBILacSal150030_1948 | NAD-dependent glyceraldehyde-3-phosphate dehydrogenase EC 1.2.1.12                                   |
| Lactobacillus salivarius | VBILacSal82003_1479  | Oligopeptide ABC transporter 2C periplasmic oligopeptide-binding protein OppA TC 3.A.1.5.1           |
| Lactobacillus salivarius | VBILacSal202740_1481 | Oligopeptide transport ATP-binding protein OppD TC 3.A.1.5.1                                         |
| Lactobacillus salivarius | VBILacSal43464_1880  | Ornithine carbamoyltransferase EC 2.1.3.3                                                            |
| Lactobacillus salivarius | VBILacSal164140_0273 | Ornithine carbamoyltransferase EC 2.1.3.3                                                            |
| Lactobacillus salivarius | VBILacSal43464_0642  | Ornithine carbamoyltransferase EC 2.1.3.3                                                            |
| Lactobacillus salivarius | VBILacSal150030_0708 | Osmotically activated L-carnitine choline ABC transporter 2C ATP-binding protein OpuCA               |
| Lactobacillus salivarius | VBILacSal43464_0060  | Phosphoglucosamine mutase EC 5.4.2.10                                                                |
| Lactobacillus salivarius | VBILacSal43464_1701  | Phosphoglucosamine mutase EC 5.4.2.10                                                                |
| Lactobacillus salivarius | VBILacSal43464_0948  | Protein export cytoplasm protein SecA ATPase RNA helicase TC 3.A.5.1.1                               |
| Lactobacillus salivarius | VBILacSal194107_0243 | Protein serine threonine phosphatase PrpC 2C regulation of stationary phase                          |
| Lactobacillus salivarius | VBILacSal202740_0292 | putative ATP-dependent Clp proteinase ATP-binding subunit                                            |
| Lactobacillus salivarius | VBILacSal43464_0054  | Pyrraline-5-carboxylate reductase EC 1.5.1.2                                                         |
| Lactobacillus salivarius | VBILacSal194107_1091 | Respiratory nitrate reductase alpha chain EC 1.7.99.4                                                |
| Lactobacillus salivarius | VBILacSal43464_1538  | RNA polymerase sigma factor RpoD                                                                     |
| Lactobacillus salivarius | VBILacSal194107_0219 | RNA polymerase sigma factor RpoD                                                                     |
| Lactobacillus salivarius | VBILacSal43464_0803  | sensor histidine kinase                                                                              |
| Lactobacillus salivarius | VBILacSal150030_2176 | sensor histidine kinase                                                                              |

Table S8

|                          |                      |                                                                                                           |
|--------------------------|----------------------|-----------------------------------------------------------------------------------------------------------|
| Lactobacillus salivarius | VBILacSal43464_1794  | sensor histidine kinase                                                                                   |
| Lactobacillus salivarius | VBILacSal202740_0431 | Surface protein Rib                                                                                       |
| Lactobacillus salivarius | VBILacSal202740_0422 | Surface protein Rib                                                                                       |
| Lactobacillus salivarius | VBILacSal202740_0625 | Surface protein Rib                                                                                       |
| Lactobacillus salivarius | VBILacSal202740_0383 | Surface protein Rib                                                                                       |
| Lactobacillus salivarius | VBILacSal43464_2034  | Translation elongation factor Tu                                                                          |
| Lactobacillus salivarius | VBILacSal43464_1483  | Translation elongation factor Tu                                                                          |
| Lactobacillus salivarius | VBILacSal164140_0602 | Translation elongation factor Tu                                                                          |
| Lactobacillus salivarius | VBILacSal43464_0110  | Translation elongation factor Tu                                                                          |
| Lactobacillus salivarius | VBILacSal82003_0933  | Two component system response regulator CiaR                                                              |
| Lactobacillus salivarius | VBILacSal82003_0943  | Tyrosine-protein kinase EpsD EC 2.7.10.2                                                                  |
| Lactobacillus salivarius | VBILacSal194107_1515 | UDP-galactopyranose mutase EC 5.4.99.9                                                                    |
| Lactobacillus salivarius | VBILacSal82003_1337  | UDP-galactopyranose mutase EC 5.4.99.9                                                                    |
| Lactobacillus salivarius | VBILacSal194107_0516 | UDP-galactopyranose mutase EC 5.4.99.9                                                                    |
| Lactobacillus salivarius | VBILacSal82003_1876  | UDP-glucose 4-epimerase EC 5.1.3.2                                                                        |
| Lactobacillus salivarius | VBILacSal150030_1218 | Undecaprenyl pyrophosphate synthetase EC 2.5.1.31                                                         |
| Lactobacillus salivarius | VBILacSal82003_1146  | Undecaprenyl-phosphate galactosephosphotransferase EC 2.7.8.6                                             |
| Lactobacillus vaginalis  | VBILacVag81158_0479  | ABC transporter 2C ATP-binding permease protein                                                           |
| Lactobacillus vaginalis  | VBILacVag81158_1375  | ABC transporter 2C ATP-binding protein                                                                    |
| Lactobacillus vaginalis  | VBILacVag81158_0945  | Alkyl hydroperoxide reductase protein C EC 1.6.4.-                                                        |
| Lactobacillus vaginalis  | VBILacVag81158_1313  | ATP-dependent protease ATP-binding subunit clpL                                                           |
| Lactobacillus vaginalis  | VBILacVag81158_0464  | Cell envelope-associated transcriptional attenuator LytR-CpsA-Psr 2C subfamily F2 as in PMID19099556      |
| Lactobacillus vaginalis  | VBILacVag81158_0879  | ClpB protein                                                                                              |
| Lactobacillus vaginalis  | VBILacVag81158_1340  | <b>Ferrous iron transport protein B</b>                                                                   |
| Lactobacillus vaginalis  | VBILacVag81158_0988  | FIG00745466 hypothetical protein                                                                          |
| Lactobacillus vaginalis  | VBILacVag81158_0471  | Glycerol-3-phosphate ABC transporter 2C ATP-binding protein UgpC TC 3.A.1.1.3                             |
| Lactobacillus vaginalis  | VBILacVag81158_0325  | Glycosyltransferase related enzyme                                                                        |
| Lactobacillus vaginalis  | VBILacVag81158_1113  | Heat shock protein 60 family chaperone GroEL                                                              |
| Lactobacillus vaginalis  | VBILacVag81158_0752  | Oligopeptide ABC transporter 2C periplasmic oligopeptide-binding protein OppA TC 3.A.1.5.1                |
| Lactobacillus vaginalis  | VBILacVag81158_0221  | Phosphoglucosamine mutase EC 5.4.2.10 Phosphomannomutase EC 5.4.2.8                                       |
| Lactobacillus vaginalis  | VBILacVag81158_0482  | Translation elongation factor Tu                                                                          |
| Lactobacillus vaginalis  | VBILacVag81158_0837  | Tyrosine-protein kinase EpsD EC 2.7.10.2                                                                  |
| Lactococcus lactis       | VBILacLac4574_0121   | 4-keto-6-deoxy-N-Acetyl-D-hexosaminyL-Lipid carrier aminotransferase                                      |
| Lactococcus lactis       | VBILacLac141273_0133 | ABC-type antimicrobial peptide transport system 2C ATPase component                                       |
| Lactococcus lactis       | VBILacLac136773_0229 | Arabinose 5-phosphate isomerase EC 5.3.1.13                                                               |
| Lactococcus lactis       | VBILacLac141273_0267 | ATP-dependent protease ATP-binding subunit clpL                                                           |
| Lactococcus lactis       | VBILacLac141273_0132 | Calcium-transporting ATPase EC 3.6.3.8                                                                    |
| Lactococcus lactis       | VBILacLac38071_0978  | Cell division trigger factor EC 5.2.1.8                                                                   |
| Lactococcus lactis       | VBILacLac4574_1996   | Cell envelope-associated transcriptional attenuator LytR-CpsA-Psr 2C subfamily F2 as in PMID19099556      |
| Lactococcus lactis       | VBILacLac136773_2393 | ClpB protein                                                                                              |
| Lactococcus lactis       | VBILacLac4574_1658   | dTDP-4-dehydrorhamnose reductase EC 1.1.1.133                                                             |
| Lactococcus lactis       | VBILacLac38071_1575  | dTDP-glucose 4 2C6-dehydratase EC 4.2.1.46                                                                |
| Lactococcus lactis       | VBILacLac141273_0129 | Fibronectin fibrinogen-binding protein                                                                    |
| Lactococcus lactis       | VBILacLac38071_1105  | Fibronectin-binding protein                                                                               |
| Lactococcus lactis       | VBILacLac4574_1664   | Glucose-1-phosphate thymidyltransferase EC 2.7.7.24                                                       |
| Lactococcus lactis       | VBILacLac4574_1007   | Glutamine ABC transporter 2C periplasmic glutamine-binding protein TC 3.A.1.3.2                           |
| Lactococcus lactis       | VBILacLac141273_1946 | Glycerol-3-phosphate ABC transporter 2C ATP-binding protein UgpC TC 3.A.1.1.3                             |
| Lactococcus lactis       | VBILacLac136773_1795 | Glycosyltransferase related enzyme                                                                        |
| Lactococcus lactis       | VBILacLac141273_1896 | Heat shock protein 60 family chaperone GroEL                                                              |
| Lactococcus lactis       | VBILacLac4574_2390   | L-proline glycine betaine ABC transport system permease protein ProV TC 3.A.1.12.1                        |
| Lactococcus lactis       | VBILacLac141273_2502 | O-antigen export system ATP-binding protein RfbE                                                          |
| Lactococcus lactis       | VBILacLac141273_0134 | Oligopeptide ABC transporter 2C periplasmic oligopeptide-binding protein OppA TC 3.A.1.5.1                |
| Lactococcus lactis       | VBILacLac141273_1234 | Oligopeptide ABC transporter 2C periplasmic oligopeptide-binding protein OppA TC 3.A.1.5.1                |
| Lactococcus lactis       | VBILacLac4574_1651   | Possible glycosyltransferase                                                                              |
| Lactococcus lactis       | VBILacLac136773_0728 | Putrescine transport ATP-binding protein PotA TC 3.A.1.11.1                                               |
| Lactococcus lactis       | VBILacLac4574_0207   | Pyrroline-5-carboxylate reductase EC 1.5.1.2                                                              |
| Lactococcus lactis       | VBILacLac4574_1708   | Sortase A 2C LPXTG specific                                                                               |
| Lactococcus lactis       | VBILacLac141273_1426 | Sortase A 2C LPXTG specific                                                                               |
| Lactococcus lactis       | VBILacLac141273_1842 | Transport ATP-binding protein CydD                                                                        |
| Lactococcus lactis       | VBILacLac136773_0292 | Two component system response regulator CiaR                                                              |
| Lactococcus lactis       | VBILacLac4574_1555   | UDP-galactopyranose mutase EC 5.4.99.9                                                                    |
| Lactococcus lactis       | VBILacLac141273_0956 | Undecaprenyl-phosphate galactosephosphotransferase EC 2.7.8.6                                             |
| Lautropia mirabilis      | VBILauMir174490_1971 | 3-oxoacyl-acyl-carrier-protein synthase 2C KASII EC 2.3.1.41                                              |
| Lautropia mirabilis      | VBILauMir174490_0028 | ABC transporter 2C ATP-binding protein                                                                    |
| Lautropia mirabilis      | VBILauMir174490_1970 | ABC transporter 2C ATP-binding protein EcsA                                                               |
| Lautropia mirabilis      | VBILauMir174490_1801 | ATP synthase beta chain EC 3.6.3.14                                                                       |
| Lautropia mirabilis      | VBILauMir174490_0086 | ATP-dependent Clp protease 2C ATP-binding subunit ClpC Negative regulator of genetic competence clcC mecB |
| Lautropia mirabilis      | VBILauMir174490_1462 | Cation transport ATPase                                                                                   |
| Lautropia mirabilis      | VBILauMir174490_1740 | ClpB protein                                                                                              |
| Lautropia mirabilis      | VBILauMir174490_2175 | Collagen-binding A protein-like                                                                           |
| Lautropia mirabilis      | VBILauMir174490_0206 | dTDP-glucose 4 2C6-dehydratase EC 4.2.1.46                                                                |
| Lautropia mirabilis      | VBILauMir174490_0620 | dTDP-glucose 4 2C6-dehydratase EC 4.2.1.46                                                                |
| Lautropia mirabilis      | VBILauMir174490_1337 | Enolase EC 4.2.1.11                                                                                       |
| Lautropia mirabilis      | VBILauMir174490_1071 | Fibronectin-binding protein                                                                               |
| Lautropia mirabilis      | VBILauMir174490_1608 | Glucosyltransferase GtfG                                                                                  |
| Lautropia mirabilis      | VBILauMir174490_0298 | glycosyl transferase 2C group 2 family protein                                                            |
| Lautropia mirabilis      | VBILauMir174490_0113 | Glycosyltransferase involved in cell wall biogenesis-like                                                 |
| Lautropia mirabilis      | VBILauMir174490_0306 | glycosyltransferases involved in cell wall biogenesis                                                     |
| Lautropia mirabilis      | VBILauMir174490_1152 | Heat shock protein 60 family chaperone GroEL                                                              |

Table S8

|                       |                      |                                                                                                           |
|-----------------------|----------------------|-----------------------------------------------------------------------------------------------------------|
| Lautropia mirabilis   | VBILauMir174490_1405 | hypothetical protein                                                                                      |
| Lautropia mirabilis   | VBILauMir174490_1493 | hypothetical protein                                                                                      |
| Lautropia mirabilis   | VBILauMir174490_2457 | L-proline glycine betaine ABC transport system permease protein ProV TC 3.A.1.12.1                        |
| Lautropia mirabilis   | VBILauMir174490_1675 | N-acetylmuramoyl-L-alanine amidase EC 3.5.1.28                                                            |
| Lautropia mirabilis   | VBILauMir174490_2526 | O-succinylbenzoic acid-CoA ligase EC 6.2.1.26                                                             |
| Lautropia mirabilis   | VBILauMir174490_0059 | Oligopeptide ABC transporter 2C periplasmic oligopeptide-binding protein OppA TC 3.A.1.5.1                |
| Lautropia mirabilis   | VBILauMir174490_1345 | Oligopeptide ABC transporter 2C periplasmic oligopeptide-binding protein OppA TC 3.A.1.5.1                |
| Lautropia mirabilis   | VBILauMir174490_1442 | Oligopeptide ABC transporter 2C periplasmic oligopeptide-binding protein OppA TC 3.A.1.5.1                |
| Lautropia mirabilis   | VBILauMir174490_0685 | Oligopeptide ABC transporter 2C periplasmic oligopeptide-binding protein OppA TC 3.A.1.5.1                |
| Lautropia mirabilis   | VBILauMir174490_1473 | polymerization and export protein                                                                         |
| Lautropia mirabilis   | VBILauMir174490_1735 | Protein export cytoplasm protein SecA ATPase RNA helicase TC 3.A.5.1.1                                    |
| Lautropia mirabilis   | VBILauMir174490_0249 | putative ATP-dependent Clp proteinase ATP-binding subunit                                                 |
| Lautropia mirabilis   | VBILauMir174490_0617 | putative lipopolysaccharide biosynthesis protein                                                          |
| Lautropia mirabilis   | VBILauMir174490_0110 | Pyrroline-5-carboxylate reductase EC 1.5.1.2                                                              |
| Lautropia mirabilis   | VBILauMir174490_2528 | response regulator                                                                                        |
| Lautropia mirabilis   | VBILauMir174490_1150 | RNA polymerase sigma factor RpoD                                                                          |
| Lautropia mirabilis   | VBILauMir174490_1366 | sensor histidine kinase                                                                                   |
| Lautropia mirabilis   | VBILauMir174490_0003 | Sorbitol-6-phosphate 2-dehydrogenase EC 1.1.1.140                                                         |
| Lautropia mirabilis   | VBILauMir174490_0815 | Translation elongation factor Tu                                                                          |
| Lautropia mirabilis   | VBILauMir174490_2536 | tRNA 5-methylaminomethyl-2-thiouridylate-methyltransferase EC 2.1.1.61                                    |
| Lautropia mirabilis   | VBILauMir174490_2584 | tRNA 5-methylaminomethyl-2-thiouridylate-methyltransferase EC 2.1.1.61                                    |
| Lautropia mirabilis   | VBILauMir174490_2465 | Two-component response regulator SA14-24                                                                  |
| Lautropia mirabilis   | VBILauMir174490_0795 | Two-component response regulator SA14-24                                                                  |
| Lautropia mirabilis   | VBILauMir174490_1965 | Two-component system histidine kinase                                                                     |
| Lautropia mirabilis   | VBILauMir174490_0406 | UDP-galactopyranose mutase EC 5.4.99.9                                                                    |
| Lautropia mirabilis   | VBILepBuc70646_2602  | Undecaprenyl pyrophosphate synthetase EC 2.5.1.31                                                         |
| Leptotrichia buccalis | VBILepBuc70646_1222  | 3-oxoacyl-acyl-carrier protein reductase EC 1.1.1.100                                                     |
| Leptotrichia buccalis | VBILepBuc70646_2079  | 3-oxoacyl-acyl-carrier protein reductase EC 1.1.1.100                                                     |
| Leptotrichia buccalis | VBILepBuc70646_2081  | ABC transporter 2C ATP-binding protein                                                                    |
| Leptotrichia buccalis | VBILepBuc70646_2219  | ABC transporter iron.B12.siderophore.hemin 2C ATP-binding component                                       |
| Leptotrichia buccalis | VBILepBuc70646_0026  | ABC-type multidrug transport system 2C ATPase component                                                   |
| Leptotrichia buccalis | VBILepBuc70646_0450  | Accessory gene regulator protein C                                                                        |
| Leptotrichia buccalis | VBILepBuc70646_0070  | Alcohol dehydrogenase EC 1.1.1.1                                                                          |
| Leptotrichia buccalis | VBILepBuc70646_0076  | Alcohol dehydrogenase EC 1.1.1.1                                                                          |
| Leptotrichia buccalis | VBILepBuc70646_1906  | Alcohol dehydrogenase EC 1.1.1.1 3B Acetaldehyde dehydrogenase EC 1.2.1.10                                |
| Leptotrichia buccalis | VBILepBuc70646_2311  | Asparagine synthetase glutamine-hydrolyzing EC 6.3.5.4                                                    |
| Leptotrichia buccalis | VBILepBuc70646_2282  | ATP synthase alpha chain EC 3.6.3.14                                                                      |
| Leptotrichia buccalis | VBILepBuc70646_2310  | ATP synthase beta chain EC 3.6.3.14                                                                       |
| Leptotrichia buccalis | VBILepBuc70646_0406  | ATP-dependent Clp protease 2C ATP-binding subunit ClpC                                                    |
| Leptotrichia buccalis | VBILepBuc70646_0447  | ATP-dependent Clp protease 2C ATP-binding subunit ClpC                                                    |
| Leptotrichia buccalis | VBILepBuc70646_1294  | ATP-dependent Clp protease 2C ATP-binding subunit ClpC Negative regulator of genetic competence clcC mecB |
| Leptotrichia buccalis | VBILepBuc70646_0360  | Bacteriocin ABC-transporter 2C ATP-binding and permease component                                         |
| Leptotrichia buccalis | VBILepBuc70646_2113  | Benzoate-CoA ligase EC 6.2.1.25                                                                           |
| Leptotrichia buccalis | VBILepBuc70646_1183  | Cation transport ATPase                                                                                   |
| Leptotrichia buccalis | VBILepBuc70646_0115  | Cell envelope-associated transcriptional attenuator LytR-CpsA-Psr 2C subfamily F2 as in PMID19099556      |
| Leptotrichia buccalis | VBILepBuc70646_1577  | Cell envelope-associated transcriptional attenuator LytR-CpsA-Psr 2C subfamily F2 as in PMID19099556      |
| Leptotrichia buccalis | VBILepBuc70646_0131  | Choline binding protein A                                                                                 |
| Leptotrichia buccalis | VBILepBuc70646_1382  | Choline binding protein A                                                                                 |
| Leptotrichia buccalis | VBILepBuc70646_1504  | Choline binding protein A                                                                                 |
| Leptotrichia buccalis | VBILepBuc70646_1399  | Choline binding protein A                                                                                 |
| Leptotrichia buccalis | VBILepBuc70646_0171  | Choline binding protein A                                                                                 |
| Leptotrichia buccalis | VBILepBuc70646_1335  | Choline binding protein A                                                                                 |
| Leptotrichia buccalis | VBILepBuc70646_1469  | Choline binding protein A                                                                                 |
| Leptotrichia buccalis | VBILepBuc70646_1296  | Choline binding protein A                                                                                 |
| Leptotrichia buccalis | VBILepBuc70646_0639  | D-alanine-polyphosphoribitol ligase subunit 1 EC 6.1.1.13                                                 |
| Leptotrichia buccalis | VBILepBuc70646_0534  | D-alanine-polyphosphoribitol ligase subunit 1 EC 6.1.1.13                                                 |
| Leptotrichia buccalis | VBILepBuc70646_0656  | D-alanine-polyphosphoribitol ligase subunit 1 EC 6.1.1.13                                                 |
| Leptotrichia buccalis | VBILepBuc70646_0539  | D-alanine-polyphosphoribitol ligase subunit 1 EC 6.1.1.13                                                 |
| Leptotrichia buccalis | VBILepBuc70646_0568  | D-alanine-polyphosphoribitol ligase subunit 1 EC 6.1.1.13                                                 |
| Leptotrichia buccalis | VBILepBuc70646_0716  | D-alanine-polyphosphoribitol ligase subunit 1 EC 6.1.1.13                                                 |
| Leptotrichia buccalis | VBILepBuc70646_0559  | D-alanine-polyphosphoribitol ligase subunit 1 EC 6.1.1.13                                                 |
| Leptotrichia buccalis | VBILepBuc70646_0567  | D-alanine-polyphosphoribitol ligase subunit 1 EC 6.1.1.13                                                 |
| Leptotrichia buccalis | VBILepBuc70646_0555  | D-alanine-polyphosphoribitol ligase subunit 1 EC 6.1.1.13                                                 |
| Leptotrichia buccalis | VBILepBuc70646_0771  | D-alanine-polyphosphoribitol ligase subunit 1 EC 6.1.1.13                                                 |
| Leptotrichia buccalis | VBILepBuc70646_0658  | D-alanine-polyphosphoribitol ligase subunit 1 EC 6.1.1.13                                                 |
| Leptotrichia buccalis | VBILepBuc70646_0536  | D-alanine-polyphosphoribitol ligase subunit 1 EC 6.1.1.13                                                 |
| Leptotrichia buccalis | VBILepBuc70646_2080  | dTDP-4-dehydrorhamnose 3 2C5-epimerase EC 5.1.3.13                                                        |
| Leptotrichia buccalis | VBILepBuc70646_1592  | dTDP-4-dehydrorhamnose reductase EC 1.1.1.133                                                             |
| Leptotrichia buccalis | VBILepBuc70646_1983  | Enolase EC 4.2.1.11                                                                                       |
| Leptotrichia buccalis | VBILepBuc70646_2099  | Ferrichrome-iron receptor                                                                                 |
| Leptotrichia buccalis | VBILepBuc70646_0027  | Fibronectin-binding protein                                                                               |
| Leptotrichia buccalis | VBILepBuc70646_0824  | FIG00754400 hypothetical protein                                                                          |
| Leptotrichia buccalis | VBILepBuc70646_0332  | FIG01114247 hypothetical protein                                                                          |
| Leptotrichia buccalis | VBILepBuc70646_0350  | FIG01114247 hypothetical protein                                                                          |
| Leptotrichia buccalis | VBILepBuc70646_2112  | Gamma-glutamyltranspeptidase EC 2.3.2.2                                                                   |
| Leptotrichia buccalis | VBILepBuc70646_0239  | Glucose-1-phosphate thymidyltransferase EC 2.7.7.24                                                       |
| Leptotrichia buccalis | VBILepBuc70646_2171  | Glutamate-1-semialdehyde aminotransferase EC 5.4.3.8                                                      |
| Leptotrichia buccalis | VBILepBuc70646_2257  | Glycerol-3-phosphate transporter                                                                          |
| Leptotrichia buccalis | VBILepBuc70646_1878  | Glycerol-3-phosphate transporter                                                                          |

Table S8

|                           |                     |                                                                                                                              |
|---------------------------|---------------------|------------------------------------------------------------------------------------------------------------------------------|
| Leptotrichia buccalis     | VBILepBuc70646_0831 | Glycosyl transferase 2C group 1                                                                                              |
| Leptotrichia buccalis     | VBILepBuc70646_1473 | Glycosyltransferase                                                                                                          |
| Leptotrichia buccalis     | VBILepBuc70646_0030 | Glycosyltransferase involved in cell wall biogenesis-like                                                                    |
| Leptotrichia buccalis     | VBILepBuc70646_2241 | GTP pyrophosphokinase EC 2.7.6.5 2C pppGpp synthetase I                                                                      |
| Leptotrichia buccalis     | VBILepBuc70646_1941 | Heat shock protein 60 family chaperone GroEL                                                                                 |
| Leptotrichia buccalis     | VBILepBuc70646_0983 | Heat shock protein 60 family chaperone GroEL                                                                                 |
| Leptotrichia buccalis     | VBILepBuc70646_0095 | Hemolysins and related proteins containing CBS domains                                                                       |
| Leptotrichia buccalis     | VBILepBuc70646_2094 | Isochorismate synthase EC 5.4.4.2 of siderophore biosynthesis                                                                |
| Leptotrichia buccalis     | VBILepBuc70646_2235 | Lipopolysaccharide heptosyltransferase I EC 2.4.1.-                                                                          |
| Leptotrichia buccalis     | VBILepBuc70646_1995 | Long-chain-fatty-acid-CoA ligase EC 6.2.1.3                                                                                  |
| Leptotrichia buccalis     | VBILepBuc70646_2147 | Manganese ABC transporter 2C inner membrane permease protein SitD                                                            |
| Leptotrichia buccalis     | VBILepBuc70646_1811 | Membrane protein                                                                                                             |
| Leptotrichia buccalis     | VBILepBuc70646_1014 | Methionine ABC transporter ATP-binding protein                                                                               |
| Leptotrichia buccalis     | VBILepBuc70646_2196 | Nitrate nitrite transporter                                                                                                  |
| Leptotrichia buccalis     | VBILepBuc70646_1182 | Oligopeptide ABC transporter 2C periplasmic oligopeptide-binding protein OppA TC 3.A.1.5.1                                   |
| Leptotrichia buccalis     | VBILepBuc70646_0306 | Oligopeptide ABC transporter 2C periplasmic oligopeptide-binding protein OppA TC 3.A.1.5.1                                   |
| Leptotrichia buccalis     | VBILepBuc70646_2312 | Phetidoglycan-binding domain 1 protein                                                                                       |
| Leptotrichia buccalis     | VBILepBuc70646_1243 | Phosphate transport ATP-binding protein PstB TC 3.A.1.7.1                                                                    |
| Leptotrichia buccalis     | VBILepBuc70646_1773 | Phosphatidate cytidyltransferase EC 2.7.7.41                                                                                 |
| Leptotrichia buccalis     | VBILepBuc70646_1247 | putative ATP-dependent Clp proteinase ATP-binding subunit                                                                    |
| Leptotrichia buccalis     | VBILepBuc70646_1206 | putative glycosyltransferase - possibly involved in cell wall localization and side chain formation of rhamnose-glucose poly |
| Leptotrichia buccalis     | VBILepBuc70646_2313 | Putative OMR family iron-siderophore receptor precursor                                                                      |
| Leptotrichia buccalis     | VBILepBuc70646_2188 | Respiratory nitrate reductase beta chain EC 1.7.99.4                                                                         |
| Leptotrichia buccalis     | VBILepBuc70646_0449 | response regulator                                                                                                           |
| Leptotrichia buccalis     | VBILepBuc70646_0772 | RNA polymerase sigma factor RpoD                                                                                             |
| Leptotrichia buccalis     | VBILepBuc70646_0029 | RNA polymerase sigma factor RpoD                                                                                             |
| Leptotrichia buccalis     | VBILepBuc70646_1796 | RNA polymerase sigma factor RpoD                                                                                             |
| Leptotrichia buccalis     | VBILepBuc70646_0285 | Sortase A 2C LPXTG specific                                                                                                  |
| Leptotrichia buccalis     | VBILepBuc70646_2314 | TonB-dependent siderophore receptor                                                                                          |
| Leptotrichia buccalis     | VBILepBuc70646_1718 | Translation elongation factor Tu                                                                                             |
| Leptotrichia buccalis     | VBILepBuc70646_2160 | Twitching motility protein PilT                                                                                              |
| Leptotrichia buccalis     | VBILepBuc70646_1221 | UDP-galactopyranose mutase EC 5.4.99.9                                                                                       |
| Leptotrichia buccalis     | VBILepBuc70646_0863 | UDP-N-acetylglucosamine 4 2C6-dehydratase EC 4.2.1.-                                                                         |
| Leptotrichia goodfellowii | VBILepGoo29969_2037 | ABC transporter ATP-binding protein                                                                                          |
| Leptotrichia goodfellowii | VBILepGoo29969_0601 | ABC transporter related                                                                                                      |
| Leptotrichia goodfellowii | VBILepGoo29969_0181 | ABC-type multidrug transport system 2C ATPase component                                                                      |
| Leptotrichia goodfellowii | VBILepGoo29969_1284 | ABC-type polar amino acid transport system 2C ATPase component                                                               |
| Leptotrichia goodfellowii | VBILepGoo29969_0978 | Acetaldehyde dehydrogenase 2C ethanolamine utilization cluster                                                               |
| Leptotrichia goodfellowii | VBILepGoo29969_0339 | Acetoacetyl-CoA reductase EC 1.1.1.36                                                                                        |
| Leptotrichia goodfellowii | VBILepGoo29969_1678 | Acetoin dehydrogenase E1 component beta-subunit EC 1.2.4.-                                                                   |
| Leptotrichia goodfellowii | VBILepGoo29969_1211 | ADP-heptose synthase EC 2.7.-.- D-glycero-beta-D-manno-heptose 7-phosphate kinase                                            |
| Leptotrichia goodfellowii | VBILepGoo29969_1793 | ADP-heptose synthase EC 2.7.-.- D-glycero-beta-D-manno-heptose 7-phosphate kinase                                            |
| Leptotrichia goodfellowii | VBILepGoo29969_0921 | Alcohol dehydrogenase EC 1.1.1.1 3B Acetaldehyde dehydrogenase EC 1.2.1.10                                                   |
| Leptotrichia goodfellowii | VBILepGoo29969_1199 | Alkyl hydroperoxide reductase protein C EC 1.6.4.-                                                                           |
| Leptotrichia goodfellowii | VBILepGoo29969_1986 | Amino acid transport ATP-binding protein                                                                                     |
| Leptotrichia goodfellowii | VBILepGoo29969_0322 | Anthranilate synthase 2C aminase component EC 4.1.3.27                                                                       |
| Leptotrichia goodfellowii | VBILepGoo29969_1543 | Arabinose 5-phosphate isomerase EC 5.3.1.13                                                                                  |
| Leptotrichia goodfellowii | VBILepGoo29969_1826 | ATP synthase alpha chain EC 3.6.3.14                                                                                         |
| Leptotrichia goodfellowii | VBILepGoo29969_1960 | ATP synthase beta chain EC 3.6.3.14                                                                                          |
| Leptotrichia goodfellowii | VBILepGoo29969_1041 | ATPase component CbiO of energizing module of cobalt ECF transporter                                                         |
| Leptotrichia goodfellowii | VBILepGoo29969_0035 | capsular polysaccharide biosynthesis protein                                                                                 |
| Leptotrichia goodfellowii | VBILepGoo29969_0029 | chain length determinant protein                                                                                             |
| Leptotrichia goodfellowii | VBILepGoo29969_2187 | ClpB protein                                                                                                                 |
| Leptotrichia goodfellowii | VBILepGoo29969_1209 | cobalt ABC transporter ATP-binding protein                                                                                   |
| Leptotrichia goodfellowii | VBILepGoo29969_1670 | COG1272 Predicted membrane protein hemolysin III homolog                                                                     |
| Leptotrichia goodfellowii | VBILepGoo29969_2169 | Conjugative transfer protein TrbE                                                                                            |
| Leptotrichia goodfellowii | VBILepGoo29969_0705 | Cytochrome c heme lyase subunit CcmF                                                                                         |
| Leptotrichia goodfellowii | VBILepGoo29969_0810 | Dipeptide transport ATP-binding protein dppD                                                                                 |
| Leptotrichia goodfellowii | VBILepGoo29969_1285 | Ferrous iron transport protein B                                                                                             |
| Leptotrichia goodfellowii | VBILepGoo29969_0600 | General secretion pathway protein D                                                                                          |
| Leptotrichia goodfellowii | VBILepGoo29969_2195 | Glutamine ABC transporter ATP-binding protein                                                                                |
| Leptotrichia goodfellowii | VBILepGoo29969_2035 | Glutamine transport ATP-binding protein GlnQ TC 3.A.1.3.2                                                                    |
| Leptotrichia goodfellowii | VBILepGoo29969_0881 | Glutamyl-tRNA reductase EC 1.2.1.70                                                                                          |
| Leptotrichia goodfellowii | VBILepGoo29969_2137 | Heat shock protein 60 family chaperone GroEL                                                                                 |
| Leptotrichia goodfellowii | VBILepGoo29969_1080 | HtrA protease chaperone protein                                                                                              |
| Leptotrichia goodfellowii | VBILepGoo29969_1086 | Integral membrane protein with CBS domains                                                                                   |
| Leptotrichia goodfellowii | VBILepGoo29969_0793 | Iron (III) dicitrate transport system permease protein FecD TC 3.A.1.14.1                                                    |
| Leptotrichia goodfellowii | VBILepGoo29969_0345 | Lipid-A-disaccharide synthase EC 2.4.1.182                                                                                   |
| Leptotrichia goodfellowii | VBILepGoo29969_1725 | Lipoate-protein ligase A                                                                                                     |
| Leptotrichia goodfellowii | VBILepGoo29969_1489 | Manganese ABC transporter 2C ATP-binding protein SitB                                                                        |
| Leptotrichia goodfellowii | VBILepGoo29969_1372 | Manganese ABC transporter 2C inner membrane permease protein SitD                                                            |
| Leptotrichia goodfellowii | VBILepGoo29969_1517 | Manganese ABC transporter 2C periplasmic-binding protein SitA                                                                |
| Leptotrichia goodfellowii | VBILepGoo29969_0503 | Membrane-associated zinc metalloprotease                                                                                     |
| Leptotrichia goodfellowii | VBILepGoo29969_0019 | Myo-inositol 2-dehydrogenase EC 1.1.1.18                                                                                     |
| Leptotrichia goodfellowii | VBILepGoo29969_1053 | NAD-dependent glyceraldehyde-3-phosphate dehydrogenase EC 1.2.1.12                                                           |
| Leptotrichia goodfellowii | VBILepGoo29969_0324 | Oligopeptide transport ATP-binding protein OppD TC 3.A.1.5.1                                                                 |
| Leptotrichia goodfellowii | VBILepGoo29969_1791 | Oligopeptide transport ATP-binding protein OppD TC 3.A.1.5.1                                                                 |
| Leptotrichia goodfellowii | VBILepGoo29969_1759 | Oligopeptide transport ATP-binding protein OppF TC 3.A.1.5.1                                                                 |
| Leptotrichia goodfellowii | VBILepGoo29969_0813 | Oligopeptide transport ATP-binding protein OppF TC 3.A.1.5.1                                                                 |

Table S8

|                           |                     |                                                                                                                 |
|---------------------------|---------------------|-----------------------------------------------------------------------------------------------------------------|
| Leptotrichia goodfellowii | VBILepGoo29969_0425 | Outer membrane protein assembly factor YaeT precursor                                                           |
| Leptotrichia goodfellowii | VBILepGoo29969_0824 | Porphobilinogen deaminase EC 2.5.1.61                                                                           |
| Leptotrichia goodfellowii | VBILepGoo29969_1558 | Probable beta-glycosyltransferase                                                                               |
| Leptotrichia goodfellowii | VBILepGoo29969_1283 | RNA binding methyltransferase FtsI like                                                                         |
| Leptotrichia goodfellowii | VBILepGoo29969_0755 | RNA polymerase sigma factor RpoD                                                                                |
| Leptotrichia goodfellowii | VBILepGoo29969_1147 | Translation elongation factor Tu                                                                                |
| Leptotrichia goodfellowii | VBILepGoo29969_0748 | Type IV fimbrial biogenesis protein PilY1                                                                       |
| Leptotrichia goodfellowii | VBILepGoo29969_0754 | Type IV fimbrial biogenesis protein PilY1                                                                       |
| Leptotrichia goodfellowii | VBILepGoo29969_0194 | Tyrosine-protein kinase Wzc EC 2.7.10.2                                                                         |
| Leptotrichia goodfellowii | VBILepGoo29969_0018 | UDP-N-acetylglucosamine 2-epimerase EC 5.1.3.14                                                                 |
| Leptotrichia goodfellowii | VBILepGoo29969_0782 | Urease alpha subunit EC 3.5.1.5                                                                                 |
| Leptotrichia goodfellowii | VBILepGoo29969_1998 | V-type ATP synthase subunit A EC 3.6.3.14                                                                       |
| Leptotrichia goodfellowii | VBILepGoo29969_2021 | V-type ATP synthase subunit B EC 3.6.3.14                                                                       |
| Leptotrichia hofstadii    | VBILepHof63998_2141 | 3-oxoacyl-acyl-carrier protein reductase EC 1.1.1.100                                                           |
| Leptotrichia hofstadii    | VBILepHof63998_1009 | 3-oxoacyl-acyl-carrier protein reductase EC 1.1.1.100                                                           |
| Leptotrichia hofstadii    | VBILepHof63998_1523 | 3-oxoacyl-acyl-carrier-protein synthase 2C KASII EC 2.3.1.41                                                    |
| Leptotrichia hofstadii    | VBILepHof63998_1794 | 3R-hydroxymyristoyl-acyl carrier protein dehydratase EC 4.2.1.-                                                 |
| Leptotrichia hofstadii    | VBILepHof63998_0097 | ABC transporter 2C ATP-binding permease protein                                                                 |
| Leptotrichia hofstadii    | VBILepHof63998_0072 | ABC transporter related                                                                                         |
| Leptotrichia hofstadii    | VBILepHof63998_1899 | Acetoin dehydrogenase E1 component beta-subunit EC 1.2.4.-                                                      |
| Leptotrichia hofstadii    | VBILepHof63998_1762 | Acyl-acyl-carrier-protein--UDP-N- acetylglucosamine O-acyltransferase EC 2.3.1.129                              |
| Leptotrichia hofstadii    | VBILepHof63998_0143 | Acyl-acyl-carrier-protein--UDP-N- acetylglucosamine O-acyltransferase EC 2.3.1.129                              |
| Leptotrichia hofstadii    | VBILepHof63998_2448 | ADP-heptose synthase EC 2.7.-.- D-glycero-beta-D-manno-heptose 7-phosphate kinase                               |
| Leptotrichia hofstadii    | VBILepHof63998_1076 | Alcohol dehydrogenase EC 1.1.1.1 3B Acetaldehyde dehydrogenase EC 1.2.1.10                                      |
| Leptotrichia hofstadii    | VBILepHof63998_1948 | Amino acid transport ATP-binding protein                                                                        |
| Leptotrichia hofstadii    | VBILepHof63998_0634 | Aspartate racemase EC 5.1.1.13                                                                                  |
| Leptotrichia hofstadii    | VBILepHof63998_1953 | ATP synthase alpha chain EC 3.6.3.14                                                                            |
| Leptotrichia hofstadii    | VBILepHof63998_1952 | ATP synthase beta chain EC 3.6.3.14                                                                             |
| Leptotrichia hofstadii    | VBILepHof63998_1690 | ATPase component of general energizing module of ECF transporters ATPase component of general energizing module |
| Leptotrichia hofstadii    | VBILepHof63998_1270 | Branched-chain amino acid transport ATP-binding protein LivG TC 3.A.1.4.1                                       |
| Leptotrichia hofstadii    | VBILepHof63998_0301 | Cell division trigger factor EC 5.2.1.8                                                                         |
| Leptotrichia hofstadii    | VBILepHof63998_1460 | Cell division trigger factor EC 5.2.1.8                                                                         |
| Leptotrichia hofstadii    | VBILepHof63998_2504 | Cell envelope-associated transcriptional attenuator LytR-CpsA-Psr 2C subfamily F2 as in PMID19099556            |
| Leptotrichia hofstadii    | VBILepHof63998_2671 | CipB protein                                                                                                    |
| Leptotrichia hofstadii    | VBILepHof63998_0320 | Diaminopimelate decarboxylase EC 4.1.1.20                                                                       |
| Leptotrichia hofstadii    | VBILepHof63998_1947 | Diaminopimelate decarboxylase EC 4.1.1.20                                                                       |
| Leptotrichia hofstadii    | VBILepHof63998_2262 | DNA-binding response regulator                                                                                  |
| Leptotrichia hofstadii    | VBILepHof63998_1626 | DNA-binding response regulator                                                                                  |
| Leptotrichia hofstadii    | VBILepHof63998_1429 | dTDP-4-dehydrorhamnose 3 2C5-epimerase EC 5.1.3.13                                                              |
| Leptotrichia hofstadii    | VBILepHof63998_1126 | dTDP-4-dehydrorhamnose reductase EC 1.1.1.133                                                                   |
| Leptotrichia hofstadii    | VBILepHof63998_1417 | dTDP-glucose 4 2C6-dehydratase EC 4.2.1.46                                                                      |
| Leptotrichia hofstadii    | VBILepHof63998_1262 | dTDP-glucose 4 2C6-dehydratase EC 4.2.1.46                                                                      |
| Leptotrichia hofstadii    | VBILepHof63998_0421 | Duplicated ATPase component MtsB of energizing module of methionine-regulated ECF transporter                   |
| Leptotrichia hofstadii    | VBILepHof63998_0994 | Enolase EC 4.2.1.11                                                                                             |
| Leptotrichia hofstadii    | VBILepHof63998_2610 | Enolase EC 4.2.1.11                                                                                             |
| Leptotrichia hofstadii    | VBILepHof63998_1251 | Fibronectin fibrinogen-binding protein                                                                          |
| Leptotrichia hofstadii    | VBILepHof63998_1872 | Glucose-1-phosphate thymidyltransferase EC 2.7.7.24                                                             |
| Leptotrichia hofstadii    | VBILepHof63998_1903 | Haemin uptake system permease protein                                                                           |
| Leptotrichia hofstadii    | VBILepHof63998_2627 | HtrA protease chaperone protein                                                                                 |
| Leptotrichia hofstadii    | VBILepHof63998_1610 | Hydroxymethylpyrimidine ABC transporter 2C ATPase component                                                     |
| Leptotrichia hofstadii    | VBILepHof63998_0130 | Imidazole glycerol phosphate synthase amidotransferase subunit EC 2.4.2.-                                       |
| Leptotrichia hofstadii    | VBILepHof63998_0125 | Imidazole glycerol phosphate synthase cyclase subunit EC 4.1.3.-                                                |
| Leptotrichia hofstadii    | VBILepHof63998_0683 | Lactaldehyde reductase EC 1.1.1.77                                                                              |
| Leptotrichia hofstadii    | VBILepHof63998_1883 | Lipoate-protein ligase A                                                                                        |
| Leptotrichia hofstadii    | VBILepHof63998_1921 | Lipopolysaccharide ABC transporter 2C ATP-binding protein LptB                                                  |
| Leptotrichia hofstadii    | VBILepHof63998_0698 | Lipopolysaccharide ABC transporter 2C ATP-binding protein LptB                                                  |
| Leptotrichia hofstadii    | VBILepHof63998_1507 | Malonyl CoA-acyl carrier protein transacylase EC 2.3.1.39                                                       |
| Leptotrichia hofstadii    | VBILepHof63998_2140 | Maltose maltodextrin transport ATP-binding protein MalK EC 3.6.3.19                                             |
| Leptotrichia hofstadii    | VBILepHof63998_2417 | Maltose maltodextrin transport ATP-binding protein MalK EC 3.6.3.19                                             |
| Leptotrichia hofstadii    | VBILepHof63998_1570 | Manganese ABC transporter 2C ATP-binding protein SitB                                                           |
| Leptotrichia hofstadii    | VBILepHof63998_1101 | Mannose-6-phosphate isomerase EC 5.3.1.8                                                                        |
| Leptotrichia hofstadii    | VBILepHof63998_2082 | Mannose-6-phosphate isomerase EC 5.3.1.8                                                                        |
| Leptotrichia hofstadii    | VBILepHof63998_0045 | Methionine ABC transporter ATP-binding protein                                                                  |
| Leptotrichia hofstadii    | VBILepHof63998_1945 | Methionine ABC transporter ATP-binding protein                                                                  |
| Leptotrichia hofstadii    | VBILepHof63998_1950 | Nucleoside 5-triphosphatase RdgB dHATP 2C dITP 2C XTP-specific EC 3.6.1.15                                      |
| Leptotrichia hofstadii    | VBILepHof63998_0633 | Nucleoside 5-triphosphatase RdgB dHATP 2C dITP 2C XTP-specific EC 3.6.1.15                                      |
| Leptotrichia hofstadii    | VBILepHof63998_1353 | Oligopeptide ABC transporter 2C periplasmic oligopeptide-binding protein OppA TC 3.A.1.5.1                      |
| Leptotrichia hofstadii    | VBILepHof63998_1351 | Oligopeptide ABC transporter 2C periplasmic oligopeptide-binding protein OppA TC 3.A.1.5.1                      |
| Leptotrichia hofstadii    | VBILepHof63998_1360 | Oligopeptide ABC transporter 2C periplasmic oligopeptide-binding protein OppA TC 3.A.1.5.1                      |
| Leptotrichia hofstadii    | VBILepHof63998_1301 | Oligopeptide ABC transporter 2C periplasmic oligopeptide-binding protein OppA TC 3.A.1.5.1                      |
| Leptotrichia hofstadii    | VBILepHof63998_2179 | Oligopeptide ABC transporter 2C periplasmic oligopeptide-binding protein OppA TC 3.A.1.5.1                      |
| Leptotrichia hofstadii    | VBILepHof63998_1654 | Oligopeptide transport ATP-binding protein OppD TC 3.A.1.5.1                                                    |
| Leptotrichia hofstadii    | VBILepHof63998_1397 | Oligopeptide transport ATP-binding protein OppF TC 3.A.1.5.1                                                    |
| Leptotrichia hofstadii    | VBILepHof63998_1689 | Oligopeptide transport ATP-binding protein OppF TC 3.A.1.5.1                                                    |
| Leptotrichia hofstadii    | VBILepHof63998_1580 | Ornithine carbamoyltransferase EC 2.1.3.3                                                                       |
| Leptotrichia hofstadii    | VBILepHof63998_1059 | Phosphoglucosamine mutase EC 5.4.2.10                                                                           |
| Leptotrichia hofstadii    | VBILepHof63998_1980 | Phosphoglucosamine mutase EC 5.4.2.10                                                                           |
| Leptotrichia hofstadii    | VBILepHof63998_2290 | Phosphoglucosamine mutase EC 5.4.2.10                                                                           |
| Leptotrichia hofstadii    | VBILepHof63998_1083 | Phosphoglucosamine mutase EC 5.4.2.10                                                                           |

Table S8

|                             |                      |                                                                                                                    |
|-----------------------------|----------------------|--------------------------------------------------------------------------------------------------------------------|
| Leptotrichia hofstadii      | VBILepHof63998_0432  | Phosphoheptose isomerase EC 5.3.1.-                                                                                |
| Leptotrichia hofstadii      | VBILepHof63998_1949  | Phosphoheptose isomerase EC 5.3.1.-                                                                                |
| Leptotrichia hofstadii      | VBILepHof63998_1446  | Phospholipid-lipopolysaccharide ABC transporter                                                                    |
| Leptotrichia hofstadii      | VBILepHof63998_2670  | Phosphomannomutase EC 5.4.2.8                                                                                      |
| Leptotrichia hofstadii      | VBILepHof63998_1093  | Phosphomannomutase EC 5.4.2.8                                                                                      |
| Leptotrichia hofstadii      | VBILepHof63998_2156  | Phosphonate ABC transporter ATP-binding protein TC 3.A.1.9.1                                                       |
| Leptotrichia hofstadii      | VBILepHof63998_1074  | possible serine protease homolog                                                                                   |
| Leptotrichia hofstadii      | VBILepHof63998_1878  | Proposed peptidoglycan lipid II flippase MurJ                                                                      |
| Leptotrichia hofstadii      | VBILepHof63998_1478  | Protein export cytoplasm protein SecA ATPase RNA helicase TC 3.A.5.1.1                                             |
| Leptotrichia hofstadii      | VBILepHof63998_1092  | Putative coproporphyrinogen III oxidase of BS HemN-type 2C oxygen-independent EC 1.3.99.22 2C in heat shock gene c |
| Leptotrichia hofstadii      | VBILepHof63998_2272  | Putative coproporphyrinogen III oxidase of BS HemN-type 2C oxygen-independent EC 1.3.99.22 2C in heat shock gene c |
| Leptotrichia hofstadii      | VBILepHof63998_1430  | Putative mannosyltransferase involved in polysaccharide biosynthesis                                               |
| Leptotrichia hofstadii      | VBILepHof63998_1219  | putative response regulator 3B homolog of RumR and ScnR                                                            |
| Leptotrichia hofstadii      | VBILepHof63998_2644  | Putrescine transport ATP-binding protein PotA TC 3.A.1.11.1                                                        |
| Leptotrichia hofstadii      | VBILepHof63998_1944  | Putrescine transport ATP-binding protein PotA TC 3.A.1.11.1                                                        |
| Leptotrichia hofstadii      | VBILepHof63998_0438  | Pyrroline-5-carboxylate reductase EC 1.5.1.2                                                                       |
| Leptotrichia hofstadii      | VBILepHof63998_0343  | Response regulator receiver/Transcriptional regulatory protein 2C C-terminal                                       |
| Leptotrichia hofstadii      | VBILepHof63998_2608  | RNA binding methyltransferase FtsJ like                                                                            |
| Leptotrichia hofstadii      | VBILepHof63998_1938  | RNA polymerase sigma factor RpoD                                                                                   |
| Leptotrichia hofstadii      | VBILepHof63998_0930  | RNA polymerase sigma factor RpoD                                                                                   |
| Leptotrichia hofstadii      | VBILepHof63998_1703  | RNA polymerase sigma factor RpoD                                                                                   |
| Leptotrichia hofstadii      | VBILepHof63998_1041  | Sensory transduction histidine kinase                                                                              |
| Leptotrichia hofstadii      | VBILepHof63998_2002  | Sensory transduction histidine kinase                                                                              |
| Leptotrichia hofstadii      | VBILepHof63998_0354  | Serine protease precursor MucD AlgY associated with sigma factor RpoE                                              |
| Leptotrichia hofstadii      | VBILepHof63998_0335  | sugar transferase                                                                                                  |
| Leptotrichia hofstadii      | VBILepHof63998_2539  | Translation elongation factor Tu                                                                                   |
| Leptotrichia hofstadii      | VBILepHof63998_2178  | Translation elongation factor Tu                                                                                   |
| Leptotrichia hofstadii      | VBILepHof63998_0964  | Translation elongation factor Tu                                                                                   |
| Leptotrichia hofstadii      | VBILepHof63998_2261  | transporter                                                                                                        |
| Leptotrichia hofstadii      | VBILepHof63998_2057  | Two-component system regulator IlrE                                                                                |
| Leptotrichia hofstadii      | VBILepHof63998_1030  | Two-component system regulator IlrE                                                                                |
| Leptotrichia hofstadii      | VBILepHof63998_0674  | UDP-3-O-3-hydroxymyristoyl glucosamine N-acyltransferase EC 2.3.1.-                                                |
| Leptotrichia hofstadii      | VBILepHof63998_2242  | UDP-3-O-3-hydroxymyristoyl glucosamine N-acyltransferase EC 2.3.1.-                                                |
| Leptotrichia hofstadii      | VBILepHof63998_0149  | UDP-3-O-3-hydroxymyristoyl N-acetylglucosamine deacetylase EC 3.5.1.-                                              |
| Leptotrichia hofstadii      | VBILepHof63998_1281  | Undecaprenyl diphosphate synthase EC 2.5.1.31                                                                      |
| Leptotrichia hofstadii      | VBILepHof63998_1185  | Undecaprenyl-phosphate galactosephosphotransferase EC 2.7.8.6                                                      |
| Leptotrichia hofstadii      | VBILepHof63998_0057  | UTP--glucose-1-phosphate uridylyltransferase EC 2.7.7.9                                                            |
| Leptotrichia hofstadii      | VBILepHof63998_1946  | V-type ATP synthase subunit B EC 3.6.3.14                                                                          |
| Listeria monocytogenes      | VBILisMon53391_1311  | 3-deoxy-D-manno-octulosonic-acid transferase EC 2.-.-. tRNA guanine46-N7--methyltransferase EC 2.1.1.33            |
| Listeria monocytogenes      | VBILisMon37419_0475  | 3-oxoacyl-acyl-carrier protein reductase EC 1.1.1.100                                                              |
| Listeria monocytogenes      | VBILisMon53391_0659  | Acetylmethionine aminotransferase EC 2.6.1.11                                                                      |
| Listeria monocytogenes      | VBILisMon53391_0644  | ADP-heptose synthase EC 2.7.-. D-glycero-beta-D-manno-heptose 7-phosphate kinase                                   |
| Listeria monocytogenes      | VBILisMon53391_1704  | Amino acid transport ATP-binding protein                                                                           |
| Listeria monocytogenes      | VBILisMon53391_1193  | ATP synthase beta chain EC 3.6.3.14                                                                                |
| Listeria monocytogenes      | VBILisMon53391_2521  | DNA-binding response regulator                                                                                     |
| Listeria monocytogenes      | VBILisMon37419_1843  | Haemin uptake system permease protein                                                                              |
| Listeria monocytogenes      | VBILisMon53391_2268  | Hemolysins and related proteins containing CBS domains                                                             |
| Listeria monocytogenes      | VBILisMon37419_1446  | Hypothetical radical SAM family enzyme 2C NOT coproporphyrinogen III oxidase 2C oxygen-independent                 |
| Listeria monocytogenes      | VBILisMon53391_0578  | Lactaldehyde reductase EC 1.1.1.77                                                                                 |
| Listeria monocytogenes      | VBILisMon37419_0942  | Lipoate-protein ligase A                                                                                           |
| Listeria monocytogenes      | VBILisMon53391_2209  | Lipoprotein releasing system ATP-binding protein LolD                                                              |
| Listeria monocytogenes      | VBILisMon53391_0610  | Malonyl CoA-acyl carrier protein transacylase EC 2.3.1.39                                                          |
| Listeria monocytogenes      | VBILisMon37419_0623  | Nucleoside 5-triphosphatase RdgB dHATP 2C dITP 2C XTP-specific EC 3.6.1.15                                         |
| Listeria monocytogenes      | VBILisMon37419_2325  | Oligopeptide transport ATP-binding protein OppF TC 3.A.1.5.1                                                       |
| Listeria monocytogenes      | VBILisMon37419_0099  | Porphobilinogen synthase EC 4.2.1.24                                                                               |
| Listeria monocytogenes      | VBILisMon53391_0635  | sensor histidine kinase                                                                                            |
| Listeria monocytogenes      | VBILisMon37419_1337  | UDP-3-O-3-hydroxymyristoyl glucosamine N-acyltransferase EC 2.3.1.-                                                |
| Listeria monocytogenes      | VBILisMon53391_2700  | UTP--glucose-1-phosphate uridylyltransferase EC 2.7.7.9                                                            |
| Listeria monocytogenes      | VBILisMon53391_2015  | V-type ATP synthase subunit A EC 3.6.3.14                                                                          |
| Listeria monocytogenes      | VBILisMon53391_2164  | V-type ATP synthase subunit B EC 3.6.3.14                                                                          |
| Lysinibacillus fusiformis   | VBILysFus158234_3097 | 3R-hydroxymyristoyl-acyl carrier protein dehydratase EC 4.2.1.-                                                    |
| Lysinibacillus fusiformis   | VBILysFus158234_2525 | DNA-binding response regulator                                                                                     |
| Lysinibacillus fusiformis   | VBILysFus158234_0994 | Histidinol-phosphate aminotransferase EC 2.6.1.9                                                                   |
| Lysinibacillus fusiformis   | VBILysFus158234_1223 | Imidazole glycerol phosphate synthase cyclase subunit EC 4.1.3.-                                                   |
| Lysinibacillus fusiformis   | VBILysFus158234_1614 | Manganese superoxide dismutase EC 1.15.1.1                                                                         |
| Lysinibacillus fusiformis   | VBILysFus158234_1563 | Proposed peptidoglycan lipid II flippase MurJ                                                                      |
| Lysinibacillus fusiformis   | VBILysFus158234_2970 | RNA polymerase sigma factor RpoD                                                                                   |
| Lysinibacillus fusiformis   | VBILysFus158234_3790 | UDP-3-O-3-hydroxymyristoyl N-acetylglucosamine deacetylase EC 3.5.1.-                                              |
| Megasphaera micronuciformis | VBIMegMic155926_0875 | Cell division trigger factor EC 5.2.1.8                                                                            |
| Megasphaera micronuciformis | VBIMegMic155926_0048 | hypothetical protein                                                                                               |
| Megasphaera micronuciformis | VBIMegMic155926_0863 | L-proline glycine betaine ABC transport system permease protein ProV TC 3.A.1.12.1                                 |
| Megasphaera micronuciformis | VBIMegMic155926_0662 | Methionine ABC transporter ATP-binding protein                                                                     |
| Mesorhizobium loti          | VBIMesLot2464_0208   | DNA-binding response regulator                                                                                     |
| Mesorhizobium loti          | VBIMesLot2464_6572   | FIG00771820 hypothetical protein                                                                                   |
| Mesorhizobium loti          | VBIMesLot2464_5803   | FIG00771820 hypothetical protein                                                                                   |
| Mesorhizobium loti          | VBIMesLot2464_3087   | Serine protease precursor MucD AlgY associated with sigma factor RpoE                                              |
| Methanobrevibacter smithii  | Msm_1308             | 3-isopropylmalate dehydratase small subunit EC 4.2.1.33                                                            |
| Methanobrevibacter smithii  | Msm_1026             | Arabinose 5-phosphate isomerase EC 5.3.1.13                                                                        |
| Methanobrevibacter smithii  | Msm_1327             | Aspartate racemase EC 5.1.1.13                                                                                     |

Table S8

|                            |                      |                                                                                                           |
|----------------------------|----------------------|-----------------------------------------------------------------------------------------------------------|
| Methanobrevibacter smithii | Msm_1303             | COG1272 Predicted membrane protein hemolysin III homolog                                                  |
| Methanobrevibacter smithii | Msm_0330             | Diaminopimelate decarboxylase EC 4.1.1.20                                                                 |
| Methanobrevibacter smithii | Msm_1594             | Glutamate-1-semialdehyde aminotransferase EC 5.4.3.8                                                      |
| Methanobrevibacter smithii | Msm_1516             | Glutamate-1-semialdehyde aminotransferase EC 5.4.3.8                                                      |
| Methanobrevibacter smithii | Msm_0990             | Probable beta-glycosyltransferase                                                                         |
| Methanobrevibacter smithii | Msm_0895             | sugar transferase                                                                                         |
| Mitsuokella multacida      | VBIMitMul54707_0756  | 3-oxoacyl-acyl-carrier-protein synthase 2C KASII EC 2.3.1.41                                              |
| Mitsuokella multacida      | VBIMitMul54707_2151  | Branched-chain amino acid transport ATP-binding protein LivG TC 3.A.1.4.1                                 |
| Mitsuokella multacida      | VBIMitMul54707_0710  | Calcium-transporting ATPase EC 3.6.3.8                                                                    |
| Mitsuokella multacida      | VBIMitMul54707_2016  | cobalt ABC transporter ATP-binding protein                                                                |
| Mitsuokella multacida      | VBIMitMul54707_0720  | Duplicated ATPase component MtsB of energizing module of methionine-regulated ECF transporter             |
| Mitsuokella multacida      | VBIMitMul54707_1803  | Integral membrane protein with CBS domains                                                                |
| Mitsuokella multacida      | VBIMitMul54707_0792  | Phosphoheptose isomerase EC 5.3.1.-                                                                       |
| Mitsuokella multacida      | VBIMitMul54707_2153  | putative BglB fragment                                                                                    |
| Mitsuokella multacida      | VBIMitMul54707_1090  | Pyrraline-5-carboxylate reductase EC 1.5.1.2                                                              |
| Mobiluncus mulieris        | VBIMobMul167063_1187 | Acetaldehyde dehydrogenase 2C ethanolamine utilization cluster                                            |
| Mobiluncus mulieris        | VBIMobMul42155_0879  | D-glycero-D-manno-heptose 1 2C7-bisphosphate phosphatase EC 3.1.1.-                                       |
| Mobiluncus mulieris        | VBIMobMul167063_0645 | dTDP-4-dehydrorhamnose 3 2C5-epimerase EC 5.1.3.13                                                        |
| Mobiluncus mulieris        | VBIMobMul25232_0346  | dTDP-4-dehydrorhamnose reductase EC 1.1.1.133                                                             |
| Mobiluncus mulieris        | VBIMobMul167063_0232 | dTDP-glucose 4 2C6-dehydratase EC 4.2.1.46                                                                |
| Mobiluncus mulieris        | VBIMobMul167063_1544 | Glutamyl-tRNA reductase EC 1.2.1.70                                                                       |
| Mobiluncus mulieris        | VBIMobMul25232_0704  | HtrA protease chaperone protein                                                                           |
| Mobiluncus mulieris        | VBIMobMul42155_2012  | Mannose-6-phosphate isomerase EC 5.3.1.8                                                                  |
| Mobiluncus mulieris        | VBIMobMul167063_0882 | NAD-dependent glyceraldehyde-3-phosphate dehydrogenase EC 1.2.1.12                                        |
| Mobiluncus mulieris        | VBIMobMul42155_0342  | Oligopeptide ABC transporter 2C periplasmic oligopeptide-binding protein OppA TC 3.A.1.5.1                |
| Mobiluncus mulieris        | VBIMobMul25232_2120  | Oligopeptide ABC transporter 2C periplasmic oligopeptide-binding protein OppA TC 3.A.1.5.1                |
| Mobiluncus mulieris        | VBIMobMul42155_0431  | Oligopeptide ABC transporter 2C periplasmic oligopeptide-binding protein OppA TC 3.A.1.5.1                |
| Mobiluncus mulieris        | VBIMobMul42155_0213  | Oligopeptide ABC transporter 2C periplasmic oligopeptide-binding protein OppA TC 3.A.1.5.1                |
| Mobiluncus mulieris        | VBIMobMul42155_0231  | Oligopeptide ABC transporter 2C periplasmic oligopeptide-binding protein OppA TC 3.A.1.5.1                |
| Mobiluncus mulieris        | VBIMobMul25232_1112  | Oligopeptide transport ATP-binding protein OppD TC 3.A.1.5.1                                              |
| Mobiluncus mulieris        | VBIMobMul25232_1262  | Oligopeptide transport ATP-binding protein OppF TC 3.A.1.5.1                                              |
| Mobiluncus mulieris        | VBIMobMul167063_1753 | Phospholipid-lipopolysaccharide ABC transporter                                                           |
| Mobiluncus mulieris        | VBIMobMul167063_1928 | putative capsular polysaccharide synthesis protein                                                        |
| Mobiluncus mulieris        | VBIMobMul167063_1858 | Putative two-domain glycosyltransferase                                                                   |
| Mobiluncus mulieris        | VBIMobMul42155_1539  | RNA binding methyltransferase FtsJ like                                                                   |
| Mobiluncus mulieris        | VBIMobMul167063_2046 | Serine acetyltransferase EC 2.3.1.30                                                                      |
| Mobiluncus mulieris        | VBIMobMul167063_0085 | Undecaprenyl pyrophosphate synthetase EC 2.5.1.31                                                         |
| Mobiluncus mulieris        | VBIMobMul167063_2156 | Undecaprenyl-phosphate galactosephosphotransferase EC 2.7.8.6                                             |
| Moraxella catarrhalis      | VBIMorCat148474_1431 | 3-deoxy-manno-octulosonate cytidyllyltransferase EC 2.7.7.38                                              |
| Moraxella catarrhalis      | VBIMorCat148474_0681 | 3-oxoacyl-acyl-carrier protein reductase EC 1.1.1.100                                                     |
| Moraxella catarrhalis      | VBIMorCat148474_0337 | ADP-heptose synthase EC 2.7.-.- D-glycero-beta-D-manno-heptose 7-phosphate kinase                         |
| Moraxella catarrhalis      | VBIMorCat148474_1367 | Cell envelope-associated transcriptional attenuator LytR-CpsA-Prs 2C subfamily F2 as in PMID19099556      |
| Moraxella catarrhalis      | VBIMorCat148474_1680 | DNA-binding response regulator                                                                            |
| Moraxella catarrhalis      | VBIMorCat148474_0455 | Enolase EC 4.2.1.11                                                                                       |
| Moraxella catarrhalis      | VBIMorCat148474_0381 | GTP pyrophosphokinase EC 2.7.6.5 2C pppGpp synthetase I                                                   |
| Moraxella catarrhalis      | VBIMorCat148474_0384 | GTP pyrophosphokinase EC 2.7.6.5 2C pppGpp synthetase I                                                   |
| Moraxella catarrhalis      | VBIMorCat148474_1828 | Lipopolysaccharide ABC transporter 2C ATP-binding protein LptB                                            |
| Moraxella catarrhalis      | VBIMorCat148474_0218 | Phosphoglucosamine mutase EC 5.4.2.10                                                                     |
| Moraxella catarrhalis      | VBIMorCat148474_0183 | Phosphomannomutase EC 5.4.2.8                                                                             |
| Moraxella catarrhalis      | VBIMorCat148474_0716 | Porphobilinogen synthase EC 4.2.1.24                                                                      |
| Moraxella catarrhalis      | VBIMorCat148474_0750 | Porphobilinogen synthase EC 4.2.1.24                                                                      |
| Moraxella catarrhalis      | VBIMorCat148474_0543 | Translation elongation factor Tu                                                                          |
| Moraxella catarrhalis      | VBIMorCat148474_0544 | Translation elongation factor Tu                                                                          |
| Moraxella catarrhalis      | VBIMorCat148474_1041 | Two-component system regulator IlrE                                                                       |
| Mycobacterium leprae       | VBIMycLep78757_3551  | ClpB protein                                                                                              |
| Mycobacterium leprae       | VBIMycLep78757_0060  | ESAT-6 Esx family secreted protein EsxA YukE                                                              |
| Mycobacterium leprae       | VBIMycLep121698_4828 | Heat shock protein 60 family chaperone GroEL                                                              |
| Mycobacterium leprae       | VBIMycLep121698_0019 | Manganese ABC transporter 2C ATP-binding protein SitB                                                     |
| Mycobacterium leprae       | VBIMycLep121698_0061 | Manganese ABC transporter 2C inner membrane permease protein SitD                                         |
| Mycobacterium leprae       | VBIMycLep121698_4737 | Mg2+ transport ATPase 2C P-type EC 3.6.3.2                                                                |
| Mycobacterium leprae       | VBIMycLep78757_4514  | Multidrug resistance ABC transporter ATP-binding and permease protein                                     |
| Mycobacterium leprae       | VBIMycLep121698_3265 | Phosphonate ABC transporter ATP-binding protein TC 3.A.1.9.1                                              |
| Mycobacterium leprae       | VBIMycLep121698_2820 | possible serine protease homolog                                                                          |
| Mycobacterium leprae       | VBIMycLep78757_2065  | Protein export cytoplasm protein SecA ATPase RNA helicase TC 3.A.5.1.1                                    |
| Mycobacterium leprae       | VBIMycLep78757_3744  | RNA binding methyltransferase FtsJ like                                                                   |
| Mycobacterium leprae       | VBIMycLep78757_2814  | Serine threonine protein kinase PrkC 2C regulator of stationary phase                                     |
| Mycobacterium leprae       | VBIMycLep121698_4682 | Translation elongation factor Tu                                                                          |
| Mycobacterium leprae       | VBIMycLep121698_3571 | Translation elongation factor Tu                                                                          |
| Mycobacterium tuberculosis | VBIMycTub38905_3177  | 3-oxoacyl-acyl-carrier-protein synthase 2C KASII EC 2.3.1.41                                              |
| Mycobacterium tuberculosis | VBIMycTub22151_1526  | ABC transporter 2C ATP-binding protein                                                                    |
| Mycobacterium tuberculosis | VBIMycTub38905_1391  | ATP-dependent Clp protease 2C ATP-binding subunit ClpC Negative regulator of genetic competence clcC mecB |
| Mycobacterium tuberculosis | VBIMycTub38905_1680  | cation-transporting ATPase                                                                                |
| Mycobacterium tuberculosis | VBIMycTub38905_2800  | Cell division trigger factor EC 5.2.1.8                                                                   |
| Mycobacterium tuberculosis | VBIMycTub22151_0570  | Chemotaxis protein CheV EC 2.7.3.-                                                                        |
| Mycobacterium tuberculosis | VBIMycTub22151_0766  | Flagellar biosynthesis protein FlhA                                                                       |
| Mycobacterium tuberculosis | VBIMycTub22151_0329  | Flagellar motor switch protein FlhG                                                                       |
| Mycobacterium tuberculosis | VBIMycTub22151_3745  | Heat shock protein 60 family chaperone GroEL                                                              |
| Mycobacterium tuberculosis | VBIMycTub22151_3301  | Heme efflux system ATPase HrtA                                                                            |
| Mycobacterium tuberculosis | VBIMycTub38905_0557  | Internalin-like protein LPXTG motif Lmo0333 homolog                                                       |

Table S8

|                                   |                            |                                                                                    |
|-----------------------------------|----------------------------|------------------------------------------------------------------------------------|
| Mycobacterium tuberculosis        | VBIMycTub38905_0151        | Internalin-like protein LPXTG motif Lmo0333 homolog                                |
| Mycobacterium tuberculosis        | VBIMycTub22151_4351        | Internalin-like protein LPXTG motif Lmo0333 homolog                                |
| Mycobacterium tuberculosis        | VBIMycTub38905_1241        | Internalin-like protein LPXTG motif Lmo0333 homolog                                |
| <b>Mycobacterium tuberculosis</b> | <b>VBIMycTub38905_1836</b> | <b>Lipid A export ATP-binding permease protein MsbA</b>                            |
| Mycobacterium tuberculosis        | VBIMycTub22151_1530        | Membrane-bound lytic murein transglycosylase D precursor EC 3.2.1.-                |
| Mycobacterium tuberculosis        | VBIMycTub38905_3223        | motility accessory factor                                                          |
| Mycobacterium tuberculosis        | VBIMycTub38905_2541        | Oligopeptide transport ATP-binding protein OppD TC 3.A.1.5.1                       |
| Mycobacterium tuberculosis        | VBIMycTub38905_4312        | Oligopeptide transport ATP-binding protein OppF TC 3.A.1.5.1                       |
| Mycobacterium tuberculosis        | VBIMycTub22151_3306        | Putative peptidoglycan bound protein LPXTG motif Lmo2179 homolog                   |
| Mycobacterium tuberculosis        | VBIMycTub22151_3520        | Putative peptidoglycan bound protein LPXTG motif Lmo2179 homolog                   |
| Mycobacterium tuberculosis        | VBIMycTub38905_1387        | Two-component sensor kinase SA14-24                                                |
| <b>Mycoplasma fermentans</b>      | <b>VBIMycFer34481_0477</b> | <b>ABC transporter iron.B12.siderophore.hemin 2C ATP-binding component</b>         |
| Mycoplasma fermentans             | VBIMycFer34481_0692        | Acetylmethionine aminotransferase EC 2.6.1.11                                      |
| Mycoplasma fermentans             | VBIMycFer34481_0728        | Alkyl hydroperoxide reductase protein C EC 1.6.4.-                                 |
| <b>Mycoplasma fermentans</b>      | <b>VBIMycFer34481_0599</b> | <b>Ferrichrome transport system permease protein fluB TC 3.A.1.14.3</b>            |
| <b>Mycoplasma fermentans</b>      | <b>VBIMycFer34481_0529</b> | <b>Lipid-A-disaccharide synthase EC 2.4.1.182</b>                                  |
| Mycoplasma fermentans             | VBIMycFer179416_0256       | Lipoate-protein ligase A                                                           |
| Mycoplasma fermentans             | VBIMycFer179416_0494       | Manganese ABC transporter 2C periplasmic-binding protein SitA                      |
| Mycoplasma fermentans             | VBIMycFer34481_0257        | Phosphoglucosamine mutase EC 5.4.2.10                                              |
| Mycoplasma fermentans             | VBIMycFer179416_0843       | Phosphomannomutase EC 5.4.2.8                                                      |
| Mycoplasma fermentans             | VBIMycFer34481_0364        | Predicted erythritol ABC transporter 1 2C ATP-binding component 1                  |
| Mycoplasma fermentans             | VBIMycFer34481_0199        | Translation elongation factor Tu                                                   |
| Mycoplasma fermentans             | VBIMycFer179416_0681       | Translation elongation factor Tu                                                   |
| <b>Mycoplasma fermentans</b>      | <b>VBIMycFer34481_0048</b> | <b>UDP-4-amino-4-deoxy-L-arabinose--oxoglutarate aminotransferase EC 2.6.1.-</b>   |
| Mycoplasma fermentans             | VBIMycFer179416_0608       | Uncharacterized iron compound ABC uptake transporter 2C permease protein           |
| Mycoplasma genitalium             | VBIMycGen98045_0015        | 3-oxoacyl-acyl-carrier-protein synthase 2C KASII EC 2.3.1.41                       |
| Mycoplasma genitalium             | VBIMycGen98045_0417        | ABC transporter ATP-binding protein                                                |
| Mycoplasma genitalium             | VBIMycGen98045_0466        | ABC transporter ATP-binding protein                                                |
| Mycoplasma genitalium             | VBIMycGen98045_0014        | Beta-1 2C3-glucosyltransferase                                                     |
| Mycoplasma genitalium             | VBIMycGen98045_0369        | ClpB protein                                                                       |
| Mycoplasma genitalium             | VBIMycGen98045_0458        | daunorubicin resistance ATP-binding protein drrA                                   |
| Mycoplasma genitalium             | VBIMycGen98045_0519        | Flp pilus assembly protein 2C ATPase CpaF                                          |
| Mycoplasma genitalium             | VBIMycGen98045_0090        | Magnesium and cobalt efflux protein CorC                                           |
| Mycoplasma genitalium             | VBIMycGen98045_0061        | Membrane-associated zinc metalloprotease                                           |
| Mycoplasma genitalium             | VBIMycGen98045_0023        | Phosphatidate cytidyltransferase EC 2.7.7.41                                       |
| Mycoplasma genitalium             | VBIMycGen98045_0468        | Protein export cytoplasm protein SecA ATPase RNA helicase TC 3.A.5.1.1             |
| Mycoplasma genitalium             | VBIMycGen98045_0363        | Putative fimbrial subunit                                                          |
| Mycoplasma genitalium             | VBIMycGen98045_0081        | Putrescine transport ATP-binding protein PotA TC 3.A.1.11.1                        |
| Mycoplasma genitalium             | VBIMycGen98045_0253        | Thioic acid export ATP-binding protein TagH EC 3.6.3.40                            |
| Mycoplasma hominis                | VBIMycHom120329_0515       | ABC transporter ATP-binding protein                                                |
| Mycoplasma hominis                | VBIMycHom120329_0247       | Putative fimbrial subunit                                                          |
| Mycoplasma hominis                | VBIMycHom120329_0080       | Signal transduction histidine kinase CheA EC 2.7.3.-                               |
| Mycoplasma pneumoniae             | VBIMycPne110_0669          | ATP synthase alpha chain EC 3.6.3.14                                               |
| Mycoplasma pneumoniae             | VBIMycPne110_0018          | Flagellin protein FlaA                                                             |
| Mycoplasma pneumoniae             | VBIMycPne110_0298          | Flagellin protein FlaA                                                             |
| Mycoplasma pneumoniae             | VBIMycPne110_0225          | Flp pilus assembly protein 2C ATPase CpaF                                          |
| Mycoplasma pneumoniae             | VBIMycPne110_0428          | Manganese ABC transporter 2C inner membrane permease protein SitD                  |
| Mycoplasma pneumoniae             | VBIMycPne110_0229          | Signal transduction histidine kinase CheA EC 2.7.3.-                               |
| <b>Mycoplasma pneumoniae</b>      | <b>VBIMycPne110_0730</b>   | <b>UDP-N-acetylglucosamine 2-epimerase EC 5.1.3.14</b>                             |
| Neisseria bacilliformis           | VBINeiBac171574_2717       | 3-oxoacyl-acyl-carrier-protein synthase 2C KASII EC 2.3.1.41                       |
| Neisseria bacilliformis           | VBINeiBac171574_2065       | Acyl-acyl-carrier-protein--UDP-N- acetylglucosamine O-acyltransferase EC 2.3.1.129 |
| Neisseria bacilliformis           | VBINeiBac171574_2713       | Arginine ABC transporter 2C permease protein ArtQ                                  |
| Neisseria bacilliformis           | VBINeiBac171574_0620       | ATP synthase alpha chain EC 3.6.3.14                                               |
| Neisseria bacilliformis           | VBINeiBac171574_0772       | ATP synthase beta chain EC 3.6.3.14                                                |
| Neisseria bacilliformis           | VBINeiBac171574_2885       | ATP synthase beta chain EC 3.6.3.14                                                |
| Neisseria bacilliformis           | VBINeiBac171574_2567       | ATP-dependent Clp protease ATP-binding subunit ClpA                                |
| Neisseria bacilliformis           | VBINeiBac171574_2926       | MEMBRANE NUCLEASE                                                                  |
| Neisseria bacilliformis           | VBINeiBac171574_0031       | Methionine ABC transporter ATP-binding protein                                     |
| Neisseria bacilliformis           | VBINeiBac171574_2365       | NADH-ubiquinone oxidoreductase chain G EC 1.6.5.3                                  |
| Neisseria bacilliformis           | VBINeiBac171574_2924       | Ornithine carbamoyltransferase EC 2.1.3.3                                          |
| Neisseria bacilliformis           | VBINeiBac171574_1043       | Porphobilinogen synthase EC 4.2.1.24                                               |
| Neisseria bacilliformis           | VBINeiBac171574_2630       | Probable polybeta-D-mannuronate O-acetylase EC 2.3.1.-                             |
| Neisseria bacilliformis           | VBINeiBac171574_0148       | Protein export cytoplasm protein SecA ATPase RNA helicase TC 3.A.5.1.1             |
| Neisseria bacilliformis           | VBINeiBac171574_2558       | Respiratory nitrate reductase alpha chain EC 1.7.99.4                              |
| Neisseria bacilliformis           | VBINeiBac171574_2118       | RNA polymerase sigma factor RpoD                                                   |
| Neisseria bacilliformis           | VBINeiBac171574_0329       | Twitching motility protein PilT                                                    |
| Neisseria bacilliformis           | VBINeiBac171574_2678       | Type IV pilus biogenesis protein PilQ                                              |
| Neisseria elongata                | VBINeiElo48274_0329        | 2-deoxy-D-gluconate 3-dehydrogenase EC 1.1.1.125                                   |
| Neisseria elongata                | VBINeiElo48274_2436        | ABC transporter ATP-binding protein                                                |
| Neisseria elongata                | VBINeiElo48274_2574        | ABC transporter ATP-binding protein                                                |
| Neisseria elongata                | VBINeiElo48274_1803        | ATP synthase alpha chain EC 3.6.3.14                                               |
| Neisseria elongata                | VBINeiElo48274_0838        | ATP synthase alpha chain EC 3.6.3.14                                               |
| Neisseria elongata                | VBINeiElo48274_0825        | ATP synthase beta chain EC 3.6.3.14                                                |
| Neisseria elongata                | VBINeiElo48274_0731        | Cation-transporting ATPase 2C E1-E2 family                                         |
| Neisseria elongata                | VBINeiElo48274_1732        | Cell division protein DivIC FtsB 2C stabilizes FtsL against RasP cleavage          |
| Neisseria elongata                | VBINeiElo48274_1402        | Cell division protein DivIC FtsB 2C stabilizes FtsL against RasP cleavage          |
| Neisseria elongata                | VBINeiElo48274_0678        | COG0463 Glycosyltransferases involved in cell wall biogenesis                      |
| Neisseria elongata                | VBINeiElo48274_1659        | Cyclopropane-fatty-acyl-phospholipid synthase 1 2C CmaA1 EC 2.1.1.79               |
| Neisseria elongata                | VBINeiElo48274_1607        | Cyclopropane-fatty-acyl-phospholipid synthase 2 2C CmaA2 EC 2.1.1.79               |

Table S8

|                      |                      |                                                                                                     |
|----------------------|----------------------|-----------------------------------------------------------------------------------------------------|
| Neisseria elongata   | VBINeiElo48274_0765  | cytadherence accessory protein HMW1                                                                 |
| Neisseria elongata   | VBINeiElo48274_2215  | Enolase EC 4.2.1.11                                                                                 |
| Neisseria elongata   | VBINeiElo48274_0086  | Enolase EC 4.2.1.11                                                                                 |
| Neisseria elongata   | VBINeiElo48274_2242  | ESX-3 secretion system protein EccE3                                                                |
| Neisseria elongata   | VBINeiElo48274_0750  | FIG00834532 hypothetical protein                                                                    |
| Neisseria elongata   | VBINeiElo48274_0099  | FIG00837007 hypothetical protein                                                                    |
| Neisseria elongata   | VBINeiElo48274_2517  | Glucose-1-phosphate thymidyltransferase EC 2.7.7.24                                                 |
| Neisseria elongata   | VBINeiElo48274_1706  | Glucose-1-phosphate thymidyltransferase EC 2.7.7.24                                                 |
| Neisseria elongata   | VBINeiElo48274_0084  | glycosyl transferase 2C group 2 family protein EC2.4.1.-                                            |
| Neisseria elongata   | VBINeiElo48274_2214  | GTP pyrophosphokinase EC 2.7.6.5 2C pppGpp synthetase I                                             |
| Neisseria elongata   | VBINeiElo48274_0824  | Heat shock protein 60 family chaperone GroEL                                                        |
| Neisseria elongata   | VBINeiElo48274_2113  | hypothetical protein                                                                                |
| Neisseria elongata   | VBINeiElo48274_1297  | hypothetical protein                                                                                |
| Neisseria elongata   | VBINeiElo48274_1169  | hypothetical protein                                                                                |
| Neisseria elongata   | VBINeiElo48274_2578  | Imidazole glycerol phosphate synthase amidotransferase subunit EC 2.4.2.-                           |
| Neisseria elongata   | VBINeiElo48274_1505  | <b>Iron (III) dicitrate transport system 2C periplasmic iron-binding protein FecB TC 3.A.1.14.1</b> |
| Neisseria elongata   | VBINeiElo48274_2108  | Isocitrate lyase EC 4.1.3.1 2C group III 2C Mycobacterial type ICL2                                 |
| Neisseria elongata   | VBINeiElo48274_2109  | Isocitrate lyase EC 4.1.3.1 2C group III 2C Mycobacterial type ICL2                                 |
| Neisseria elongata   | VBINeiElo48274_1157  | <b>Lipid A export ATP-binding permease protein MsbA</b>                                             |
| Neisseria elongata   | VBINeiElo48274_0562  | <b>Lipid A export ATP-binding permease protein MsbA EC 3.6.3.25</b>                                 |
| Neisseria elongata   | VBINeiElo48274_2112  | <b>Lipid A export ATP-binding permease protein MsbA EC 3.6.3.25</b>                                 |
| Neisseria elongata   | VBINeiElo48274_0917  | LIPOPROTEIN                                                                                         |
| Neisseria elongata   | VBINeiElo48274_2457  | Long-chain fatty-acid-AMP ligase 2C Mycobacterial subgroup FadD29                                   |
| Neisseria elongata   | VBINeiElo48274_2432  | Long-chain-fatty-acid--CoA ligase EC 6.2.1.3                                                        |
| Neisseria elongata   | VBINeiElo48274_2573  | Long-chain-fatty-acid--CoA ligase EC 6.2.1.3                                                        |
| Neisseria elongata   | VBINeiElo48274_2110  | Malonyl CoA-acyl carrier protein transacylase EC 2.3.1.39                                           |
| Neisseria elongata   | VBINeiElo48274_2439  | Malonyl CoA-acyl carrier protein transacylase EC 2.3.1.39                                           |
| Neisseria elongata   | VBINeiElo48274_0375  | Maltose maltodextrin transport ATP-binding protein MalK EC 3.6.3.19                                 |
| Neisseria elongata   | VBINeiElo48274_0348  | MEMBRANE NUCLEASE                                                                                   |
| Neisseria elongata   | VBINeiElo48274_0001  | MEMBRANE NUCLEASE                                                                                   |
| Neisseria elongata   | VBINeiElo48274_0345  | MEMBRANE NUCLEASE                                                                                   |
| Neisseria elongata   | VBINeiElo48274_1086  | Multiple sugar ABC transporter 2C ATP-binding protein                                               |
| Neisseria elongata   | VBINeiElo48274_0489  | NAD-dependent glyceraldehyde-3-phosphate dehydrogenase EC 1.2.1.12                                  |
| Neisseria elongata   | VBINeiElo48274_0083  | NAD-dependent glyceraldehyde-3-phosphate dehydrogenase EC 1.2.1.12                                  |
| Neisseria elongata   | VBINeiElo48274_0734  | Oligopeptide transport ATP-binding protein OppF TC 3.A.1.5.1                                        |
| Neisseria elongata   | VBINeiElo48274_2463  | Omega-amino acid--pyruvate aminotransferase EC 2.6.1.18                                             |
| Neisseria elongata   | VBINeiElo48274_0053  | Phosphomannomutase                                                                                  |
| Neisseria elongata   | VBINeiElo48274_2200  | Protein export cytoplasm protein SecA ATPase RNA helicase TC 3.A.5.1.1                              |
| Neisseria elongata   | VBINeiElo48274_1313  | Protein serine threonine phosphatase PrpC 2C regulation of stationary phase                         |
| Neisseria elongata   | VBINeiElo48274_2732  | Putative ESX-1 secretion system gating protein PPE68                                                |
| Neisseria elongata   | VBINeiElo48274_2515  | Putative ESX-1 secretion system gating protein PPE68                                                |
| Neisseria elongata   | VBINeiElo48274_2270  | Putative membrane protein                                                                           |
| Neisseria elongata   | VBINeiElo48274_0487  | Pyruvate dehydrogenase E1 component beta subunit EC 1.2.4.1                                         |
| Neisseria elongata   | VBINeiElo48274_1437  | Respiratory nitrate reductase beta chain EC 1.7.99.4                                                |
| Neisseria elongata   | VBINeiElo48274_1867  | Respiratory nitrate reductase beta chain EC 1.7.99.4                                                |
| Neisseria elongata   | VBINeiElo48274_2583  | Respiratory nitrate reductase gamma chain EC 1.7.99.4                                               |
| Neisseria elongata   | VBINeiElo48274_0170  | RNA polymerase sigma factor RpoD                                                                    |
| Neisseria elongata   | VBINeiElo48274_2555  | RNA polymerase sigma-70 factor 2C ECF subfamily                                                     |
| Neisseria elongata   | VBINeiElo48274_1342  | Serine threonine-protein kinase PknB EC 2.7.11.1                                                    |
| Neisseria elongata   | VBINeiElo48274_0649  | sugar transferase                                                                                   |
| Neisseria elongata   | VBINeiElo48274_2085  | Translation elongation factor Tu                                                                    |
| Neisseria elongata   | VBINeiElo48274_2239  | Translation elongation factor Tu                                                                    |
| Neisseria elongata   | VBINeiElo48274_0907  | Translation elongation factor Tu                                                                    |
| Neisseria elongata   | VBINeiElo48274_2552  | Translation elongation factor Tu                                                                    |
| Neisseria elongata   | VBINeiElo48274_1577  | Translation elongation factor Tu                                                                    |
| Neisseria elongata   | VBINeiElo48274_2431  | Transmembrane transport protein MmpL5                                                               |
| Neisseria elongata   | VBINeiElo48274_0555  | transport ATP-binding protein                                                                       |
| Neisseria elongata   | VBINeiElo48274_0787  | Twitching motility protein PilT                                                                     |
| Neisseria elongata   | VBINeiElo48274_2462  | Two component system sensor histidine kinase DevS                                                   |
| Neisseria elongata   | VBINeiElo48274_2210  | UDP-galactopyranose mutase EC 5.4.99.9                                                              |
| Neisseria flavescens | VBINeiFla25453_1896  | 1-acyl-sn-glycerol-3-phosphate acyltransferase EC 2.3.1.51                                          |
| Neisseria flavescens | VBINeiFla25453_0527  | 1-acyl-sn-glycerol-3-phosphate acyltransferase EC 2.3.1.51                                          |
| Neisseria flavescens | VBINeiFla25453_1498  | 2-Keto-3-deoxy-D-manno-octulosonate-8-phosphate synthase EC 2.5.1.55                                |
| Neisseria flavescens | VBINeiFla114371_2028 | 2-Keto-3-deoxy-D-manno-octulosonate-8-phosphate synthase EC 2.5.1.55                                |
| Neisseria flavescens | VBINeiFla114371_1032 | 2-Keto-3-deoxy-D-manno-octulosonate-8-phosphate synthase EC 2.5.1.55                                |
| Neisseria flavescens | VBINeiFla25453_2044  | 3-deoxy-D-manno-octulosonic-acid transferase EC 2.-.-.-                                             |
| Neisseria flavescens | VBINeiFla25453_0219  | 3-deoxy-manno-octulosonate cytidyltransferase EC 2.7.7.38                                           |
| Neisseria flavescens | VBINeiFla114371_1784 | 3-deoxy-manno-octulosonate cytidyltransferase EC 2.7.7.38                                           |
| Neisseria flavescens | VBINeiFla25453_1296  | 3-deoxy-manno-octulosonate cytidyltransferase EC 2.7.7.38                                           |
| Neisseria flavescens | VBINeiFla114371_0957 | 3-isopropylmalate dehydratase small subunit EC 4.2.1.33                                             |
| Neisseria flavescens | VBINeiFla25453_0388  | 3-isopropylmalate dehydratase small subunit EC 4.2.1.33                                             |
| Neisseria flavescens | VBINeiFla25453_0624  | 3-oxoacyl-ACP reductase EC 1.1.1.100                                                                |
| Neisseria flavescens | VBINeiFla25453_0580  | 3-oxoacyl-ACP synthase EC 2.3.1.41 FabV like                                                        |
| Neisseria flavescens | VBINeiFla25453_0883  | 3-oxoacyl-acyl-carrier protein reductase EC 1.1.1.100                                               |
| Neisseria flavescens | VBINeiFla114371_0947 | 3-oxoacyl-acyl-carrier-protein synthase 2C KASI EC 2.3.1.41                                         |
| Neisseria flavescens | VBINeiFla25453_1951  | 3-oxoacyl-acyl-carrier-protein synthase 2C KASII EC 2.3.1.41                                        |
| Neisseria flavescens | VBINeiFla25453_0256  | 3-oxoacyl-acyl-carrier-protein synthase 2C KASII EC 2.3.1.41                                        |
| Neisseria flavescens | VBINeiFla25453_0692  | 3R-hydroxymyristoyl-acyl carrier protein dehydratase EC 4.2.1.-                                     |
| Neisseria flavescens | VBINeiFla114371_1877 | ABC transporter 2C ATP-binding protein                                                              |

Table S8

|                      |                      |                                                                                                             |
|----------------------|----------------------|-------------------------------------------------------------------------------------------------------------|
| Neisseria flavescens | VBINeiFla25453_1431  | ABC transporter 2C transmembrane region                                                                     |
| Neisseria flavescens | VBINeiFla25453_1092  | ABC-transporter system ATP-binding protein                                                                  |
| Neisseria flavescens | VBINeiFla25453_2028  | ABC-type Fe <sup>3+</sup> -hydroxamate transport system 2C periplasmic component                            |
| Neisseria flavescens | VBINeiFla114371_0210 | ABC-type multidrug transport system 2C permease component                                                   |
| Neisseria flavescens | VBINeiFla114371_0209 | ABC-type multidrug transport system 2C permease component                                                   |
| Neisseria flavescens | VBINeiFla25453_0711  | Acyl-acyl-carrier-protein--UDP-N- acetylglucosamine O-acyltransferase EC 2.3.1.129                          |
| Neisseria flavescens | VBINeiFla114371_1986 | Acyl-acyl-carrier-protein--UDP-N- acetylglucosamine O-acyltransferase EC 2.3.1.129                          |
| Neisseria flavescens | VBINeiFla25453_0586  | Adenosylmethionine-8-amino-7-oxononanoate aminotransferase EC 2.6.1.62                                      |
| Neisseria flavescens | VBINeiFla25453_1272  | ADP-heptose synthase EC 2.7.-.- D-glycero-beta-D-manno-heptose 7-phosphate kinase                           |
| Neisseria flavescens | VBINeiFla114371_2013 | ADP-heptose--lipooligosaccharide heptosyltransferase II EC 2.4.1.-                                          |
| Neisseria flavescens | VBINeiFla25453_1257  | ADP-L-glycero-D-manno-heptose-6-epimerase EC 5.1.3.20                                                       |
| Neisseria flavescens | VBINeiFla25453_1838  | Amino acid ABC transporter 2C ATP-binding protein                                                           |
| Neisseria flavescens | VBINeiFla25453_0525  | amino acid ABC transporter 2C ATP-binding protein                                                           |
| Neisseria flavescens | VBINeiFla25453_0009  | Amino acid ABC transporter 2C ATP-binding protein                                                           |
| Neisseria flavescens | VBINeiFla114371_2025 | Anthranilate phosphoribosyltransferase EC 2.4.2.18                                                          |
| Neisseria flavescens | VBINeiFla25453_1471  | Anthranilate phosphoribosyltransferase EC 2.4.2.18                                                          |
| Neisseria flavescens | VBINeiFla114371_0893 | Anthranilate synthase 2C aminase component EC 4.1.3.27                                                      |
| Neisseria flavescens | VBINeiFla25453_1522  | Anthranilate synthase 2C aminase component EC 4.1.3.27                                                      |
| Neisseria flavescens | VBINeiFla114371_2029 | Anthranilate synthase 2C aminase component EC 4.1.3.27                                                      |
| Neisseria flavescens | VBINeiFla25453_0362  | Arabinose 5-phosphate isomerase EC 5.3.1.13                                                                 |
| Neisseria flavescens | VBINeiFla114371_0892 | Aspartate racemase EC 5.1.1.13                                                                              |
| Neisseria flavescens | VBINeiFla114371_0497 | ATP synthase alpha chain EC 3.6.3.14                                                                        |
| Neisseria flavescens | VBINeiFla25453_0396  | ATP synthase alpha chain EC 3.6.3.14                                                                        |
| Neisseria flavescens | VBINeiFla25453_1927  | ATP synthase alpha chain EC 3.6.3.14                                                                        |
| Neisseria flavescens | VBINeiFla25453_0402  | ATP synthase beta chain EC 3.6.3.14                                                                         |
| Neisseria flavescens | VBINeiFla114371_0534 | ATP synthase beta chain EC 3.6.3.14                                                                         |
| Neisseria flavescens | VBINeiFla25453_1901  | ATP synthase beta chain EC 3.6.3.14                                                                         |
| Neisseria flavescens | VBINeiFla114371_0787 | ATP-dependent Clp protease ATP-binding subunit ClpA                                                         |
| Neisseria flavescens | VBINeiFla25453_0238  | ATP-dependent Clp protease ATP-binding subunit ClpA                                                         |
| Neisseria flavescens | VBINeiFla114371_0736 | ATP-dependent Clp protease ATP-binding subunit ClpA                                                         |
| Neisseria flavescens | VBINeiFla25453_1227  | ATP-dependent Clp protease ATP-binding subunit ClpA                                                         |
| Neisseria flavescens | VBINeiFla25453_1248  | ATP-dependent Clp protease ATP-binding subunit ClpA                                                         |
| Neisseria flavescens | VBINeiFla25453_0227  | ATP-dependent Clp protease ATP-binding subunit ClpA                                                         |
| Neisseria flavescens | VBINeiFla25453_1892  | ATPase provides energy for both assembly of type IV secretion complex and secretion of T-DNA complex VirB11 |
| Neisseria flavescens | VBINeiFla25453_1890  | ATPase provides energy for both assembly of type IV secretion complex and secretion of T-DNA complex VirB4  |
| Neisseria flavescens | VBINeiFla25453_0372  | Autolysin sensor kinase EC 2.7.3.-                                                                          |
| Neisseria flavescens | VBINeiFla114371_1461 | Beta 1 2C4 glucosyltransferase                                                                              |
| Neisseria flavescens | VBINeiFla25453_1099  | Beta-1 2C3-glucosyltransferase                                                                              |
| Neisseria flavescens | VBINeiFla25453_0410  | Biopolymer transport protein ExbD TolR                                                                      |
| Neisseria flavescens | VBINeiFla25453_2014  | Capsular polysaccharide biosynthesis export periplasmic protein WcbA                                        |
| Neisseria flavescens | VBINeiFla25453_0733  | Capsular polysaccharide export system protein KpsS                                                          |
| Neisseria flavescens | VBINeiFla25453_0308  | CDP-6-deoxy-delta-3 2C4-glucoseen reductase-like                                                            |
| Neisseria flavescens | VBINeiFla25453_0006  | Cell division trigger factor EC 5.2.1.8                                                                     |
| Neisseria flavescens | VBINeiFla114371_1084 | Cell division trigger factor EC 5.2.1.8                                                                     |
| Neisseria flavescens | VBINeiFla25453_1789  | Cell division trigger factor EC 5.2.1.8                                                                     |
| Neisseria flavescens | VBINeiFla114371_1009 | ClpB protein                                                                                                |
| Neisseria flavescens | VBINeiFla25453_1765  | ClpB protein                                                                                                |
| Neisseria flavescens | VBINeiFla114371_0248 | ClpB protein                                                                                                |
| Neisseria flavescens | VBINeiFla114371_2207 | ClpB protein                                                                                                |
| Neisseria flavescens | VBINeiFla25453_2065  | COG1272 Predicted membrane protein hemolysin III homolog                                                    |
| Neisseria flavescens | VBINeiFla25453_0740  | COG1272 Predicted membrane protein hemolysin III homolog                                                    |
| Neisseria flavescens | VBINeiFla114371_1678 | Copper-sensing two-component system response regulator CpxR                                                 |
| Neisseria flavescens | VBINeiFla25453_0093  | Copper-sensing two-component system response regulator CpxR                                                 |
| Neisseria flavescens | VBINeiFla25453_0010  | Coproporphyrinogen III oxidase 2C oxygen-independent EC 1.3.99.22                                           |
| Neisseria flavescens | VBINeiFla114371_0156 | D-alanyl-D-alanine carboxypeptidase D-alanyl-D-alanine-endopeptidase                                        |
| Neisseria flavescens | VBINeiFla114371_0549 | DegT DnrJ EryC1 StrS family protein                                                                         |
| Neisseria flavescens | VBINeiFla114371_1988 | Diaminopimelate decarboxylase EC 4.1.1.20                                                                   |
| Neisseria flavescens | VBINeiFla25453_0657  | Dipeptide transport ATP-binding protein DppD TC 3.A.1.5.2                                                   |
| Neisseria flavescens | VBINeiFla25453_2003  | dTDP-4-dehydrorhamnose 3 2C5-epimerase EC 5.1.3.13                                                          |
| Neisseria flavescens | VBINeiFla25453_1606  | dTDP-4-dehydrorhamnose reductase EC 1.1.1.133                                                               |
| Neisseria flavescens | VBINeiFla114371_1774 | dTDP-4-dehydrorhamnose reductase EC 1.1.1.133                                                               |
| Neisseria flavescens | VBINeiFla25453_1968  | dTDP-glucose 4 2C6-dehydratase EC 4.2.1.46                                                                  |
| Neisseria flavescens | VBINeiFla25453_0253  | Enolase EC 4.2.1.11                                                                                         |
| Neisseria flavescens | VBINeiFla25453_2049  | Ferrichrome-iron receptor                                                                                   |
| Neisseria flavescens | VBINeiFla25453_0640  | Ferrochelatase 2C protoheme ferro-lyase EC 4.99.1.1                                                         |
| Neisseria flavescens | VBINeiFla114371_1783 | Ferrous iron transport protein B                                                                            |
| Neisseria flavescens | VBINeiFla114371_1779 | Ferrous iron transport protein B                                                                            |
| Neisseria flavescens | VBINeiFla25453_1738  | Ferrous iron transport protein B                                                                            |
| Neisseria flavescens | VBINeiFla25453_0777  | FIG00848403 hypothetical protein                                                                            |
| Neisseria flavescens | VBINeiFla25453_2050  | FIG00848403 hypothetical protein                                                                            |
| Neisseria flavescens | VBINeiFla114371_2118 | FIG00849932 hypothetical protein                                                                            |
| Neisseria flavescens | VBINeiFla114371_0359 | FIG00850595 hypothetical protein                                                                            |
| Neisseria flavescens | VBINeiFla25453_0592  | FIG138576 3-oxoacyl-ACP synthase EC 2.3.1.41                                                                |
| Neisseria flavescens | VBINeiFla114371_2059 | fimbrial biogenesis and twitching motility protein 2C probable NMB1309                                      |
| Neisseria flavescens | VBINeiFla114371_1775 | fimbrial biogenesis and twitching motility protein 2C probable NMB1309                                      |
| Neisseria flavescens | VBINeiFla25453_1598  | fimbrial biogenesis and twitching motility protein 2C probable NMB1309                                      |
| Neisseria flavescens | VBINeiFla114371_0989 | FKBP-type peptidyl-prolyl cis-trans isomerase fKlB EC 5.2.1.8                                               |
| Neisseria flavescens | VBINeiFla25453_0988  | Gamma-glutamyltranspeptidase EC 2.3.2.2                                                                     |
| Neisseria flavescens | VBINeiFla114371_0370 | general secretion pathway protein H                                                                         |

Table S8

|                      |                      |                                                                                                                 |
|----------------------|----------------------|-----------------------------------------------------------------------------------------------------------------|
| Neisseria flavescens | VBINeiFla25453_1988  | Glucose-1-phosphate thymidyltransferase EC 2.7.7.24                                                             |
| Neisseria flavescens | VBINeiFla114371_1998 | Glucose-6-phosphate isomerase EC 5.3.1.9                                                                        |
| Neisseria flavescens | VBINeiFla25453_0343  | Glucose-6-phosphate isomerase EC 5.3.1.9                                                                        |
| Neisseria flavescens | VBINeiFla25453_0272  | Glutamate transport ATP-binding protein                                                                         |
| Neisseria flavescens | VBINeiFla25453_0408  | Glutamine synthetase type I EC 6.3.1.2                                                                          |
| Neisseria flavescens | VBINeiFla114371_0353 | Glutamine synthetase type I EC 6.3.1.2                                                                          |
| Neisseria flavescens | VBINeiFla114371_1048 | Glutamine synthetase type I EC 6.3.1.2                                                                          |
| Neisseria flavescens | VBINeiFla25453_0032  | Glutamyl-tRNA reductase EC 1.2.1.70                                                                             |
| Neisseria flavescens | VBINeiFla25453_1893  | Glycerol-3-phosphate cytidyltransferase EC 2.7.7.39                                                             |
| Neisseria flavescens | VBINeiFla25453_0526  | Glycerol-3-phosphate cytidyltransferase EC 2.7.7.39                                                             |
| Neisseria flavescens | VBINeiFla25453_0472  | GTP pyrophosphokinase EC 2.7.6.5 2C pppGpp synthetase I                                                         |
| Neisseria flavescens | VBINeiFla25453_0912  | GTP pyrophosphokinase EC 2.7.6.5 2C pppGpp synthetase II Guanosine-3' 2C5'-bisdiphosphate 3'-pyrophosphohydrola |
| Neisseria flavescens | VBINeiFla25453_2085  | Heat shock protein 60 family chaperone GroEL                                                                    |
| Neisseria flavescens | VBINeiFla114371_0180 | Heat shock protein 60 family chaperone GroEL                                                                    |
| Neisseria flavescens | VBINeiFla25453_0494  | Heat shock protein 60 family chaperone GroEL                                                                    |
| Neisseria flavescens | VBINeiFla25453_0573  | Hemin ABC transporter 2C permease protein                                                                       |
| Neisseria flavescens | VBINeiFla25453_0332  | Hemolysins and related proteins containing CBS domains                                                          |
| Neisseria flavescens | VBINeiFla114371_1689 | Imidazole glycerol phosphate synthase cyclase subunit EC 4.1.3.-                                                |
| Neisseria flavescens | VBINeiFla25453_1891  | Inner membrane protein forms channel for type IV secretion of T-DNA complex VirB10                              |
| Neisseria flavescens | VBINeiFla25453_2037  | Iron (III) dicitrate transport ATP-binding protein FecE TC 3.A.1.14.1                                           |
| Neisseria flavescens | VBINeiFla25453_0725  | Iron (III) dicitrate transport ATP-binding protein FecE TC 3.A.1.14.1                                           |
| Neisseria flavescens | VBINeiFla25453_2033  | Iron (III) dicitrate transport system permease protein FecD TC 3.A.1.14.1                                       |
| Neisseria flavescens | VBINeiFla25453_2086  | Iron compound ABC uptake transporter permease protein PiuC                                                      |
| Neisseria flavescens | VBINeiFla114371_0648 | Iron compound ABC uptake transporter substrate-binding protein PiuA                                             |
| Neisseria flavescens | VBINeiFla25453_0495  | iron-regulated outer membrane protein FrpB                                                                      |
| Neisseria flavescens | VBINeiFla114371_0488 | L-proline glycine betaine ABC transport system permease protein ProV TC 3.A.1.12.1                              |
| Neisseria flavescens | VBINeiFla114371_0419 | Leader peptidase Prepilin peptidase EC 3.4.23.43 N-methyltransferase EC 2.1.1.-                                 |
| Neisseria flavescens | VBINeiFla114371_0821 | LgtG                                                                                                            |
| Neisseria flavescens | VBINeiFla25453_1894  | LgtG                                                                                                            |
| Neisseria flavescens | VBINeiFla25453_0497  | Lipid A biosynthesis lauroyl acyltransferase EC 2.3.1.-                                                         |
| Neisseria flavescens | VBINeiFla25453_0339  | Lipid A export ATP-binding permease protein MsbA EC 3.6.3.25                                                    |
| Neisseria flavescens | VBINeiFla114371_0819 | Lipid A export ATP-binding permease protein MsbA EC 3.6.3.25                                                    |
| Neisseria flavescens | VBINeiFla25453_0716  | Lipid-A-disaccharide synthase EC 2.4.1.182                                                                      |
| Neisseria flavescens | VBINeiFla114371_0685 | Lipopolysaccharide ABC transporter 2C ATP-binding protein LptB                                                  |
| Neisseria flavescens | VBINeiFla25453_0348  | Lipopolysaccharide ABC transporter 2C ATP-binding protein LptB                                                  |
| Neisseria flavescens | VBINeiFla25453_0913  | Lipopolysaccharide heptosyltransferase I EC 2.4.1.-                                                             |
| Neisseria flavescens | VBINeiFla25453_1329  | Long-chain-fatty-acid--CoA ligase EC 6.2.1.3                                                                    |
| Neisseria flavescens | VBINeiFla25453_0798  | Long-chain-fatty-acid--CoA ligase EC 6.2.1.3                                                                    |
| Neisseria flavescens | VBINeiFla25453_0650  | Long-chain-fatty-acid--CoA ligase EC 6.2.1.3                                                                    |
| Neisseria flavescens | VBINeiFla114371_1045 | Lysine-arginine-ornithine-binding periplasmic protein precursor TC 3.A.1.3.1                                    |
| Neisseria flavescens | VBINeiFla25453_1340  | Macrolide export ATP-binding permease protein MacB EC 3.6.3.-                                                   |
| Neisseria flavescens | VBINeiFla25453_0907  | Macrophage infectivity potentiator GldI                                                                         |
| Neisseria flavescens | VBINeiFla25453_0064  | Magnesium and cobalt efflux protein CorC                                                                        |
| Neisseria flavescens | VBINeiFla114371_0021 | MCE-family protein Mce1B                                                                                        |
| Neisseria flavescens | VBINeiFla25453_0688  | Membrane-associated zinc metalloprotease                                                                        |
| Neisseria flavescens | VBINeiFla114371_2007 | Membrane-bound lytic murein transglycosylase B precursor EC 3.2.1.-                                             |
| Neisseria flavescens | VBINeiFla114371_1677 | Membrane-bound lytic murein transglycosylase B precursor EC 3.2.1.-                                             |
| Neisseria flavescens | VBINeiFla25453_0081  | Methionine ABC transporter ATP-binding protein                                                                  |
| Neisseria flavescens | VBINeiFla25453_0417  | MotA ToIQ ExbB proton channel family protein                                                                    |
| Neisseria flavescens | VBINeiFla25453_0914  | NAD-dependent glyceraldehyde-3-phosphate dehydrogenase EC 1.2.1.12                                              |
| Neisseria flavescens | VBINeiFla114371_1866 | NAD-dependent glyceraldehyde-3-phosphate dehydrogenase EC 1.2.1.12                                              |
| Neisseria flavescens | VBINeiFla114371_0869 | NADH-ubiquinone oxidoreductase chain G EC 1.6.5.3                                                               |
| Neisseria flavescens | VBINeiFla114371_1097 | NADPH-dependent glyceraldehyde-3-phosphate dehydrogenase EC 1.2.1.13                                            |
| Neisseria flavescens | VBINeiFla25453_0437  | Nitrate nitrite response regulator protein                                                                      |
| Neisseria flavescens | VBINeiFla25453_1862  | Nitrate nitrite response regulator protein                                                                      |
| Neisseria flavescens | VBINeiFla25453_0215  | Nitrogen regulation protein NtrX                                                                                |
| Neisseria flavescens | VBINeiFla25453_0086  | Nitrous oxide reductase maturation protein NosF ATPase                                                          |
| Neisseria flavescens | VBINeiFla25453_1600  | Nucleoside 5-triphosphatase RdgB dHATP 2C dITP 2C XTP-specific EC 3.6.1.15                                      |
| Neisseria flavescens | VBINeiFla114371_0681 | Nucleoside-diphosphate sugar epimerase dehydratase                                                              |
| Neisseria flavescens | VBINeiFla25453_0631  | Oligopeptide ABC transporter 2C periplasmic oligopeptide-binding protein OppA TC 3.A.1.5.1                      |
| Neisseria flavescens | VBINeiFla25453_0629  | Oligopeptide transport ATP-binding protein OppD TC 3.A.1.5.1                                                    |
| Neisseria flavescens | VBINeiFla114371_0135 | Omega-amino acid--pyruvate aminotransferase EC 2.6.1.18                                                         |
| Neisseria flavescens | VBINeiFla25453_0493  | Outer membrane hemoglobin-haptoglobin utilization protein HpuA                                                  |
| Neisseria flavescens | VBINeiFla25453_0146  | Outer membrane protein A precursor                                                                              |
| Neisseria flavescens | VBINeiFla114371_1985 | Outer membrane protein assembly factor YaeT precursor                                                           |
| Neisseria flavescens | VBINeiFla114371_0160 | Outer membrane protein class 1                                                                                  |
| Neisseria flavescens | VBINeiFla25453_0092  | Outer membrane protein class 1                                                                                  |
| Neisseria flavescens | VBINeiFla114371_0294 | Outer membrane receptor for ferric coprogen and ferric-rhodotorulic acid                                        |
| Neisseria flavescens | VBINeiFla114371_0327 | Outer membrane receptor for ferric coprogen and ferric-rhodotorulic acid                                        |
| Neisseria flavescens | VBINeiFla25453_1897  | Outer membrane receptor for ferric coprogen and ferric-rhodotorulic acid                                        |
| Neisseria flavescens | VBINeiFla114371_0447 | Outer membrane receptor for ferric coprogen and ferric-rhodotorulic acid                                        |
| Neisseria flavescens | VBINeiFla25453_0429  | Outer membrane receptor for ferric coprogen and ferric-rhodotorulic acid                                        |
| Neisseria flavescens | VBINeiFla25453_2069  | Outer membrane receptor for ferric coprogen and ferric-rhodotorulic acid                                        |
| Neisseria flavescens | VBINeiFla25453_1390  | Outer membrane receptor for lactoferrin or transferrin 2C lipoprotein B                                         |
| Neisseria flavescens | VBINeiFla25453_0224  | Outer membrane receptor for lactoferrin or transferrin 2C TonB-dependent protein A                              |
| Neisseria flavescens | VBINeiFla25453_1391  | Outer membrane receptor for lactoferrin or transferrin 2C TonB-dependent protein A                              |
| Neisseria flavescens | VBINeiFla114371_0638 | Outer membrane receptor proteins 2C mostly Fe transport                                                         |
| Neisseria flavescens | VBINeiFla25453_0269  | Pantoate--beta-alanine ligase EC 6.3.2.1                                                                        |
| Neisseria flavescens | VBINeiFla114371_0671 | Petrobactin ABC transporter 2C permease protein II                                                              |

Table S8

|                      |                      |                                                                                                                      |
|----------------------|----------------------|----------------------------------------------------------------------------------------------------------------------|
| Neisseria flavescens | VBINeiFla25453_0682  | Phosphatidate cytidyltransferase EC 2.7.7.41                                                                         |
| Neisseria flavescens | VBINeiFla114371_1976 | Phosphatidate cytidyltransferase EC 2.7.7.41                                                                         |
| Neisseria flavescens | VBINeiFla25453_1011  | Phosphoglucosamine mutase EC 5.4.2.10                                                                                |
| Neisseria flavescens | VBINeiFla114371_0337 | Phosphoglucosamine mutase EC 5.4.2.10                                                                                |
| Neisseria flavescens | VBINeiFla114371_0030 | Phospholipase C 3 PlcC EC 3.1.4.3                                                                                    |
| Neisseria flavescens | VBINeiFla25453_1643  | Phosphoribosylaminoimidazole-succinocarboxamide synthase EC 6.3.2.6                                                  |
| Neisseria flavescens | VBINeiFla114371_2126 | Phosphoribosylaminoimidazole-succinocarboxamide synthase EC 6.3.2.6                                                  |
| Neisseria flavescens | VBINeiFla25453_1949  | Polyphosphate kinase 2 EC 2.7.4.1                                                                                    |
| Neisseria flavescens | VBINeiFla25453_0393  | Polyphosphate kinase 2 EC 2.7.4.1                                                                                    |
| Neisseria flavescens | VBINeiFla25453_0670  | Polysaccharide export lipoprotein Wza                                                                                |
| Neisseria flavescens | VBINeiFla25453_0043  | Porphobilinogen deaminase EC 2.5.1.61                                                                                |
| Neisseria flavescens | VBINeiFla25453_1655  | Porphobilinogen synthase EC 4.2.1.24                                                                                 |
| Neisseria flavescens | VBINeiFla114371_2192 | Porphobilinogen synthase EC 4.2.1.24                                                                                 |
| Neisseria flavescens | VBINeiFla25453_0991  | Probable polybeta-D-mannuronate O-acetylase EC 2.3.1.-                                                               |
| Neisseria flavescens | VBINeiFla25453_0717  | Proposed peptidoglycan lipid II flippase MurJ                                                                        |
| Neisseria flavescens | VBINeiFla25453_0024  | Protein export cytoplasm protein SecA ATPase RNA helicase TC 3.A.5.1.1                                               |
| Neisseria flavescens | VBINeiFla114371_0912 | Protein export cytoplasm protein SecA ATPase RNA helicase TC 3.A.5.1.1                                               |
| Neisseria flavescens | VBINeiFla114371_0122 | Putative coproporphyrinogen III oxidase of BS HemN-type 2C oxygen-independent EC 1.3.99.22 2C in heat shock gene c   |
| Neisseria flavescens | VBINeiFla25453_1436  | Putative HlyD family secretion protein                                                                               |
| Neisseria flavescens | VBINeiFla25453_0728  | Putative periplasmic substrate-binding transport protein                                                             |
| Neisseria flavescens | VBINeiFla25453_0644  | Putative two-domain glycosyltransferase                                                                              |
| Neisseria flavescens | VBINeiFla114371_0456 | Putrescine transport ATP-binding protein PotG TC 3.A.1.11.2                                                          |
| Neisseria flavescens | VBINeiFla114371_0936 | Pyridoxamine 5'-phosphate oxidase EC 1.4.3.5                                                                         |
| Neisseria flavescens | VBINeiFla25453_1599  | Radical SAM family enzyme 2C similar to coproporphyrinogen III oxidase 2C oxygen-independent 2C clustered with nucl  |
| Neisseria flavescens | VBINeiFla25453_0529  | Radical SAM family protein HutW 2C similar to coproporphyrinogen III oxidase 2C oxygen-independent 2C associated wil |
| Neisseria flavescens | VBINeiFla114371_1787 | Radical SAM family protein HutW 2C similar to coproporphyrinogen III oxidase 2C oxygen-independent 2C associated wil |
| Neisseria flavescens | VBINeiFla114371_0585 | Respiratory nitrate reductase alpha chain EC 1.7.99.4                                                                |
| Neisseria flavescens | VBINeiFla25453_0031  | RNA polymerase sigma factor RpoH                                                                                     |
| Neisseria flavescens | VBINeiFla25453_1342  | RNA polymerase sigma factor RpoH                                                                                     |
| Neisseria flavescens | VBINeiFla114371_1026 | Sel1 domain protein repeat-containing protein                                                                        |
| Neisseria flavescens | VBINeiFla25453_0037  | Serine protease precursor MucD AlgY associated with sigma factor RpoE                                                |
| Neisseria flavescens | VBINeiFla114371_1021 | Serine protease precursor MucD AlgY associated with sigma factor RpoE                                                |
| Neisseria flavescens | VBINeiFla114371_0383 | sigma-54 dependent response regulator                                                                                |
| Neisseria flavescens | VBINeiFla25453_0447  | Sulfate and thiosulfate import ATP-binding protein CysA EC 3.6.3.25                                                  |
| Neisseria flavescens | VBINeiFla25453_1850  | Sulfate and thiosulfate import ATP-binding protein CysA EC 3.6.3.25                                                  |
| Neisseria flavescens | VBINeiFla114371_2030 | Superoxide dismutase Fe EC 1.15.1.1                                                                                  |
| Neisseria flavescens | VBINeiFla114371_1799 | Surface protein A                                                                                                    |
| Neisseria flavescens | VBINeiFla114371_1798 | Surface protein A                                                                                                    |
| Neisseria flavescens | VBINeiFla25453_1325  | Tetraacyldisaccharide 4'-kinase EC 2.7.1.130                                                                         |
| Neisseria flavescens | VBINeiFla114371_1786 | Tetraacyldisaccharide 4'-kinase EC 2.7.1.130                                                                         |
| Neisseria flavescens | VBINeiFla25453_1758  | TETRATRICOPEPTIDE REPEAT FAMILY PROTEIN                                                                              |
| Neisseria flavescens | VBINeiFla25453_0874  | TonB-dependent hemin 2C ferrichrome receptor                                                                         |
| Neisseria flavescens | VBINeiFla114371_0175 | TonB-dependent receptor 3B Outer membrane receptor for ferrienterochelin and colicins                                |
| Neisseria flavescens | VBINeiFla114371_1989 | Transcriptional regulatory protein RtcR                                                                              |
| Neisseria flavescens | VBINeiFla114371_1872 | Transcriptional regulatory protein RtcR                                                                              |
| Neisseria flavescens | VBINeiFla114371_0438 | Translation elongation factor Tu                                                                                     |
| Neisseria flavescens | VBINeiFla114371_0377 | Translation elongation factor Tu                                                                                     |
| Neisseria flavescens | VBINeiFla25453_1100  | Translation elongation factor Tu                                                                                     |
| Neisseria flavescens | VBINeiFla114371_0369 | Translation elongation factor Tu                                                                                     |
| Neisseria flavescens | VBINeiFla25453_1174  | Twitching motility protein PilT                                                                                      |
| Neisseria flavescens | VBINeiFla114371_1038 | Twitching motility protein PilT                                                                                      |
| Neisseria flavescens | VBINeiFla25453_1208  | Twitching motility protein PilT                                                                                      |
| Neisseria flavescens | VBINeiFla25453_0145  | Two component system histidine kinase EC 2.7.3.-                                                                     |
| Neisseria flavescens | VBINeiFla114371_1688 | Two component system histidine kinase EC 2.7.3.-                                                                     |
| Neisseria flavescens | VBINeiFla114371_0286 | Two-component system response regulator QseB                                                                         |
| Neisseria flavescens | VBINeiFla114371_0409 | Type IV fimbrial assembly 2C ATPase PilB                                                                             |
| Neisseria flavescens | VBINeiFla114371_0410 | Type IV fimbrial assembly 2C ATPase PilB                                                                             |
| Neisseria flavescens | VBINeiFla114371_0166 | Type IV fimbrial assembly protein PilC                                                                               |
| Neisseria flavescens | VBINeiFla114371_0289 | Type IV fimbrial biogenesis protein PilY1                                                                            |
| Neisseria flavescens | VBINeiFla114371_0425 | Type IV fimbrial biogenesis protein PilY1                                                                            |
| Neisseria flavescens | VBINeiFla25453_1552  | Type IV pilus biogenesis protein PilE                                                                                |
| Neisseria flavescens | VBINeiFla114371_1353 | Type IV pilus biogenesis protein PilM                                                                                |
| Neisseria flavescens | VBINeiFla25453_0887  | Type IV pilus biogenesis protein PilM                                                                                |
| Neisseria flavescens | VBINeiFla114371_0362 | Type IV pilus biogenesis protein PilM                                                                                |
| Neisseria flavescens | VBINeiFla114371_1354 | Type IV pilus biogenesis protein PilN                                                                                |
| Neisseria flavescens | VBINeiFla25453_0886  | Type IV pilus biogenesis protein PilN                                                                                |
| Neisseria flavescens | VBINeiFla114371_1425 | Type IV pilus biogenesis protein PilO                                                                                |
| Neisseria flavescens | VBINeiFla114371_1429 | Type IV pilus biogenesis protein PilP                                                                                |
| Neisseria flavescens | VBINeiFla25453_0885  | Type IV pilus biogenesis protein PilP                                                                                |
| Neisseria flavescens | VBINeiFla114371_1448 | Type IV pilus biogenesis protein PilQ                                                                                |
| Neisseria flavescens | VBINeiFla114371_0360 | Type IV pilus biogenesis protein PilQ                                                                                |
| Neisseria flavescens | VBINeiFla25453_0884  | Type IV pilus biogenesis protein PilQ                                                                                |
| Neisseria flavescens | VBINeiFla25453_0677  | Tyrosine-protein kinase Wzc EC 2.7.10.2                                                                              |
| Neisseria flavescens | VBINeiFla25453_0427  | UDP-2 2C3-diacetylglucosamine hydrolase EC 3.6.1.-                                                                   |
| Neisseria flavescens | VBINeiFla114371_1815 | UDP-3-O-3-hydroxymyristoyl N-acetylglucosamine deacetylase EC 3.5.1.-                                                |
| Neisseria flavescens | VBINeiFla25453_0977  | UDP-3-O-3-hydroxymyristoyl N-acetylglucosamine deacetylase EC 3.5.1.-                                                |
| Neisseria flavescens | VBINeiFla114371_0565 | UDP-galactose-lipid carrier transferase EC 2.-.-.-                                                                   |
| Neisseria flavescens | VBINeiFla114371_0915 | UDP-glucose dehydrogenase EC 1.1.1.22                                                                                |
| Neisseria flavescens | VBINeiFla114371_0367 | UDP-glucose dehydrogenase EC 1.1.1.22                                                                                |

Table S8

|                        |                      |                                                                                    |
|------------------------|----------------------|------------------------------------------------------------------------------------|
| Neisseria flavescens   | VBINeiFla25453_0902  | UDP-glucose dehydrogenase EC 1.1.1.22                                              |
| Neisseria flavescens   | VBINeiFla114371_1011 | Uncharacterized ABC transporter 2C ATP-binding protein YrbF                        |
| Neisseria flavescens   | VBINeiFla25453_1954  | Uncharacterized ABC transporter 2C ATP-binding protein YrbF                        |
| Neisseria flavescens   | VBINeiFla114371_1909 | Undecaprenyl pyrophosphate synthetase EC 2.5.1.31                                  |
| Neisseria flavescens   | VBINeiFla25453_0681  | Undecaprenyl pyrophosphate synthetase EC 2.5.1.31                                  |
| Neisseria flavescens   | VBINeiFla25453_0315  | UTP--glucose-1-phosphate uridylyltransferase EC 2.7.7.9                            |
| Neisseria flavescens   | VBINeiFla114371_0811 | UTP--glucose-1-phosphate uridylyltransferase EC 2.7.7.9                            |
| Neisseria flavescens   | VBINeiFla25453_1062  | Zinc ABC transporter 2C ATP-binding protein ZnuC                                   |
| Neisseria gonorrhoeae  | VBINeiGon41692_0269  | amino acid ABC transporter 2C ATP-binding protein                                  |
| Neisseria gonorrhoeae  | VBINeiGon90175_0733  | Coproporphyrinogen III oxidase 2C oxygen-independent EC 1.3.99.22                  |
| Neisseria gonorrhoeae  | VBINeiGon41692_2134  | Glutamine synthetase type I EC 6.3.1.2                                             |
| Neisseria gonorrhoeae  | VBINeiGon90175_0003  | Glutamyl-tRNA reductase EC 1.2.1.70                                                |
| Neisseria gonorrhoeae  | VBINeiGon90175_0596  | Imidazole glycerol phosphate synthase amidotransferase subunit EC 2.4.2.-          |
| Neisseria gonorrhoeae  | VBINeiGon41692_0017  | <b>Iron (III) dicitrate transport ATP-binding protein FecE TC 3.A.1.14.1</b>       |
| Neisseria gonorrhoeae  | VBINeiGon41692_0158  | <b>Lipid A biosynthesis lauroyl acyltransferase EC 2.3.1.-</b>                     |
| Neisseria gonorrhoeae  | VBINeiGon41692_0466  | <b>Lipopolysaccharide heptosyltransferase III EC 2.4.1.-</b>                       |
| Neisseria gonorrhoeae  | VBINeiGon90175_0139  | Magnesium and cobalt efflux protein CorC                                           |
| Neisseria gonorrhoeae  | VBINeiGon90175_0298  | Methionine ABC transporter ATP-binding protein                                     |
| Neisseria gonorrhoeae  | VBINeiGon90175_0425  | Nitrous oxide reductase maturation protein NosF ATPase                             |
| Neisseria gonorrhoeae  | VBINeiGon90175_0735  | Ornithine carbamoyltransferase EC 2.1.3.3                                          |
| Neisseria gonorrhoeae  | VBINeiGon90175_0710  | Outer membrane protein A precursor                                                 |
| Neisseria gonorrhoeae  | VBINeiGon90175_0483  | Outer membrane protein class 1                                                     |
| Neisseria gonorrhoeae  | VBINeiGon90175_0137  | Porphobilinogen deaminase EC 2.5.1.61                                              |
| Neisseria gonorrhoeae  | VBINeiGon90175_1528  | Protein export cytoplasm protein SecA ATPase RNA helicase TC 3.A.5.1.1             |
| Neisseria gonorrhoeae  | VBINeiGon90175_0709  | Two component system histidine kinase EC 2.7.3.-                                   |
| Neisseria gonorrhoeae  | VBINeiGon90175_2148  | Type IV pilus biogenesis protein PilE                                              |
| Neisseria lactamica    | VBINeiLac92233_1880  | 3-oxoacyl-ACP synthase EC 2.3.1.41 FabV like                                       |
| Neisseria lactamica    | VBINeiLac170077_0497 | 3-oxoacyl-acyl-carrier protein reductase EC 1.1.1.100                              |
| Neisseria lactamica    | VBINeiLac92233_0158  | ABC-transport system ATP-binding protein                                           |
| Neisseria lactamica    | VBINeiLac92233_2254  | CDP-6-deoxy-delta-3 2C4-glucoseen reductase-like                                   |
| Neisseria lactamica    | VBINeiLac170077_2467 | Diaminopimelate decarboxylase EC 4.1.1.20                                          |
| Neisseria lactamica    | VBINeiLac170077_2280 | FIG00848649 hypothetical protein                                                   |
| Neisseria lactamica    | VBINeiLac170077_0099 | Glutamate-1-semialdehyde aminotransferase EC 5.4.3.8                               |
| Neisseria lactamica    | VBINeiLac92233_0562  | GTP pyrophosphokinase EC 2.7.6.5 2C pppGpp synthetase I                            |
| Neisseria lactamica    | VBINeiLac170077_1889 | <b>Lipid carrier UDP-N-acetylgalactosaminyltransferase EC 2.4.1.-</b>              |
| Neisseria lactamica    | VBINeiLac170077_2154 | Low molecular weight protein-tyrosine-phosphatase Wzb EC 3.1.3.48                  |
| Neisseria lactamica    | VBINeiLac92233_0650  | Outer membrane hemoglobin-haptoglobin utilization protein HpuA                     |
| Neisseria lactamica    | VBINeiLac92233_1376  | Outer membrane hemoglobin-haptoglobin utilization protein HpuB                     |
| Neisseria lactamica    | VBINeiLac170077_1922 | Polysaccharide export lipoprotein Wza                                              |
| Neisseria lactamica    | VBINeiLac170077_2371 | S-ribosylhomocysteine lyase EC 4.4.1.21 Autoinducer-2 production protein LuxS      |
| Neisseria lactamica    | VBINeiLac92233_0079  | Translation elongation factor Tu                                                   |
| Neisseria lactamica    | VBINeiLac92233_2351  | Twitching motility protein PilT                                                    |
| Neisseria lactamica    | VBINeiLac170077_1715 | Type IV pilus biogenesis protein PilN                                              |
| Neisseria lactamica    | VBINeiLac170077_1144 | Type IV pilus biogenesis protein PilO                                              |
| Neisseria lactamica    | VBINeiLac170077_0684 | Type IV pilus biogenesis protein PilP                                              |
| Neisseria lactamica    | VBINeiLac170077_0660 | Type IV pilus biogenesis protein PilQ                                              |
| Neisseria lactamica    | VBINeiLac170077_1888 | UDP-glucose dehydrogenase EC 1.1.1.22                                              |
| Neisseria lactamica    | VBINeiLac92233_2230  | UTP--glucose-1-phosphate uridylyltransferase EC 2.7.7.9                            |
| Neisseria meningitidis | VBINeiMen132687_0217 | 3-oxoacyl-ACP reductase EC 1.1.1.100                                               |
| Neisseria meningitidis | VBINeiMen132687_2375 | 3R-hydroxymyristoyl-acyl carrier protein dehydratase EC 4.2.1.-                    |
| Neisseria meningitidis | VBINeiMen141067_0750 | ABC transporter 2C ATP-binding protein                                             |
| Neisseria meningitidis | VBINeiMen132687_1682 | Acetylornithine aminotransferase EC 2.6.1.11                                       |
| Neisseria meningitidis | VBINeiMen132687_2370 | Acyl-acyl-carrier-protein--UDP-N- acetylglucosamine O-acyltransferase EC 2.3.1.129 |
| Neisseria meningitidis | VBINeiMen132687_0206 | ADP-heptose--lipooligosaccharide heptosyltransferase II EC 2.4.1.-                 |
| Neisseria meningitidis | VBINeiMen132687_0758 | Alcohol dehydrogenase EC 1.1.1.1 3B Acetaldehyde dehydrogenase EC 1.2.1.10         |
| Neisseria meningitidis | VBINeiMen141067_1388 | Arabinose 5-phosphate isomerase EC 5.3.1.13                                        |
| Neisseria meningitidis | VBINeiMen132687_0934 | Autolysin sensor kinase EC 2.7.3.-                                                 |
| Neisseria meningitidis | VBINeiMen141067_2489 | Biopolymer transport protein ExbD TolR                                             |
| Neisseria meningitidis | VBINeiMen141067_0443 | ClpB protein                                                                       |
| Neisseria meningitidis | VBINeiMen132687_0549 | Enolase EC 4.2.1.11                                                                |
| Neisseria meningitidis | VBINeiMen132687_0209 | FIG138576 3-oxoacyl-ACP synthase EC 2.3.1.41                                       |
| Neisseria meningitidis | VBINeiMen141067_0541 | Gamma-glutamyltranspeptidase EC 2.3.2.2                                            |
| Neisseria meningitidis | VBINeiMen132687_1106 | Glucose-6-phosphate isomerase EC 5.3.1.9                                           |
| Neisseria meningitidis | VBINeiMen132687_1461 | <b>Hemin ABC transporter 2C permease protein</b>                                   |
| Neisseria meningitidis | VBINeiMen132687_0223 | <b>Hemolysins and related proteins containing CBS domains</b>                      |
| Neisseria meningitidis | VBINeiMen132687_0820 | Leader peptidase Prepilin peptidase EC 3.4.23.43 N-methyltransferase EC 2.1.1.-    |
| Neisseria meningitidis | VBINeiMen132687_0520 | <b>Lipid A export ATP-binding permease protein MsbA EC 3.6.3.25</b>                |
| Neisseria meningitidis | VBINeiMen132687_2073 | <b>Lipid-A-disaccharide synthase EC 2.4.1.182</b>                                  |
| Neisseria meningitidis | VBINeiMen141067_1579 | <b>Lipopolysaccharide ABC transporter 2C ATP-binding protein LptB</b>              |
| Neisseria meningitidis | VBINeiMen141067_0617 | <b>Lipopolysaccharide heptosyltransferase I EC 2.4.1.-</b>                         |
| Neisseria meningitidis | VBINeiMen132687_0933 | Macrophage infectivity potentiator GldI                                            |
| Neisseria meningitidis | VBINeiMen141067_0224 | Membrane-associated zinc metalloprotease                                           |
| Neisseria meningitidis | VBINeiMen132687_1160 | Membrane-bound lytic murein transglycosylase B precursor EC 3.2.1.-                |
| Neisseria meningitidis | VBINeiMen141067_2472 | MotA TolQ ExbB proton channel family protein                                       |
| Neisseria meningitidis | VBINeiMen141067_0550 | NAD-dependent glyceraldehyde-3-phosphate dehydrogenase EC 1.2.1.12                 |
| Neisseria meningitidis | VBINeiMen141067_0919 | NADH-ubiquinone oxidoreductase chain G EC 1.6.5.3                                  |
| Neisseria meningitidis | VBINeiMen132687_1218 | Nitrogen regulation protein NtrX                                                   |
| Neisseria meningitidis | VBINeiMen141067_0216 | Outer membrane protein assembly factor YaeT precursor                              |
| Neisseria meningitidis | VBINeiMen141067_2000 | <b>Outer membrane receptor for ferric coprogen and ferric-rhodotorulic acid</b>    |

Table S8

|                        |                      |                                                                                                           |
|------------------------|----------------------|-----------------------------------------------------------------------------------------------------------|
| Neisseria meningitidis | VBINeiMen132687_0010 | Pantoate--beta-alanine ligase EC 6.3.2.1                                                                  |
| Neisseria meningitidis | VBINeiMen141067_2527 | probable integral membrane protein NMA0408                                                                |
| Neisseria meningitidis | VBINeiMen132687_0155 | Probable polybeta-D-mannuronate O-acetylase EC 2.3.1.-                                                    |
| Neisseria meningitidis | VBINeiMen132687_1982 | Proposed peptidoglycan lipid II flippase MurJ                                                             |
| Neisseria meningitidis | VBINeiMen132687_0170 | Putative two-domain glycosyltransferase                                                                   |
| Neisseria meningitidis | VBINeiMen132687_0607 | Putrescine transport ATP-binding protein PotG TC 3.A.1.11.2                                               |
| Neisseria meningitidis | VBINeiMen132687_1883 | Pyridoxamine 5'-phosphate oxidase EC 1.4.3.5                                                              |
| Neisseria meningitidis | VBINeiMen132687_1884 | RNA polymerase sigma factor RpoD                                                                          |
| Neisseria meningitidis | VBINeiMen141067_1761 | sigma-54 dependent response regulator                                                                     |
| Neisseria meningitidis | VBINeiMen141067_0749 | TonB-dependent siderophore receptor                                                                       |
| Neisseria meningitidis | VBINeiMen132687_0523 | Transcriptional regulatory protein RtcR                                                                   |
| Neisseria meningitidis | VBINeiMen132687_0857 | Type IV fimbrial assembly 2C ATPase PilB                                                                  |
| Neisseria meningitidis | VBINeiMen132687_0847 | Type IV fimbrial assembly protein PilC                                                                    |
| Neisseria meningitidis | VBINeiMen141067_1212 | Type IV fimbrial biogenesis protein PilY1                                                                 |
| Neisseria meningitidis | VBINeiMen141067_2336 | UDP-2 2C3-diacetylglucosamine hydrolase EC 3.6.1.-                                                        |
| Neisseria meningitidis | VBINeiMen132687_2655 | UDP-3-O-3-hydroxymyristoyl glucosamine N-acyltransferase EC 2.3.1.-                                       |
| Neisseria meningitidis | VBINeiMen141067_0374 | Undecaprenyl pyrophosphate synthetase EC 2.5.1.31                                                         |
| Neisseria meningitidis | VBINeiMen132687_0207 | Zinc ABC transporter 2C ATP-binding protein ZnuC                                                          |
| Neisseria meningitidis | VBINeiMen132687_0208 | Zinc ABC transporter 2C periplasmic-binding protein ZnuA                                                  |
| Neisseria mucosa       | VBINeiMuc94085_1974  | 1-acyl-sn-glycerol-3-phosphate acyltransferase EC 2.3.1.51                                                |
| Neisseria mucosa       | VBINeiMuc55442_0109  | 3-deoxy-manno-octulosonate cytidyltransferase EC 2.7.7.38                                                 |
| Neisseria mucosa       | VBINeiMuc94085_1313  | 3-isopropylmalate dehydratase small subunit EC 4.2.1.33                                                   |
| Neisseria mucosa       | VBINeiMuc55442_2379  | 3-isopropylmalate dehydratase small subunit EC 4.2.1.33                                                   |
| Neisseria mucosa       | VBINeiMuc94085_0460  | 3-isopropylmalate dehydratase small subunit EC 4.2.1.33                                                   |
| Neisseria mucosa       | VBINeiMuc94085_1343  | 3-oxoacyl-acyl-carrier-protein synthase 2C KASII EC 2.3.1.41                                              |
| Neisseria mucosa       | VBINeiMuc94085_1303  | 3R-hydroxymyristoyl-acyl carrier protein dehydratase EC 4.2.1.-                                           |
| Neisseria mucosa       | VBINeiMuc94085_1486  | 4-keto-6-deoxy-N-Acetyl-D-hexosaminyl-Lipid carrier aminotransferase                                      |
| Neisseria mucosa       | VBINeiMuc94085_1666  | ABC-transport system ATP-binding protein                                                                  |
| Neisseria mucosa       | VBINeiMuc94085_1489  | ABC-type Fe3+-hydroxamate transport system 2C periplasmic component                                       |
| Neisseria mucosa       | VBINeiMuc94085_1308  | Acyl-acyl-carrier-protein--UDP-N- acetylglucosamine O-acyltransferase EC 2.3.1.129                        |
| Neisseria mucosa       | VBINeiMuc55442_2321  | Adenosylmethionine-8-amino-7-oxononanoate aminotransferase EC 2.6.1.62                                    |
| Neisseria mucosa       | VBINeiMuc55442_0555  | Adenosylmethionine-8-amino-7-oxononanoate aminotransferase EC 2.6.1.62                                    |
| Neisseria mucosa       | VBINeiMuc94085_1138  | Adenosylmethionine-8-amino-7-oxononanoate aminotransferase EC 2.6.1.62                                    |
| Neisseria mucosa       | VBINeiMuc94085_1734  | ADP-heptose synthase EC 2.7.-.- D-glycero-beta-D-manno-heptose 7-phosphate kinase                         |
| Neisseria mucosa       | VBINeiMuc94085_1747  | Alcohol dehydrogenase EC 1.1.1.1 3B Acetaldehyde dehydrogenase EC 1.2.1.10                                |
| Neisseria mucosa       | VBINeiMuc94085_0632  | Alkaline protease secretion protein AprE                                                                  |
| Neisseria mucosa       | VBINeiMuc55442_2615  | Alkaline protease secretion protein AprE                                                                  |
| Neisseria mucosa       | VBINeiMuc94085_1323  | Amino acid ABC transporter 2C ATP-binding protein                                                         |
| Neisseria mucosa       | VBINeiMuc94085_1315  | Amino acid ABC transporter 2C permease protein                                                            |
| Neisseria mucosa       | VBINeiMuc55442_0870  | Anthranilate synthase 2C aminase component EC 4.1.3.27                                                    |
| Neisseria mucosa       | VBINeiMuc94085_0406  | Anthranilate synthase 2C aminase component EC 4.1.3.27                                                    |
| Neisseria mucosa       | VBINeiMuc55442_2347  | Anthranilate synthase 2C aminase component EC 4.1.3.27                                                    |
| Neisseria mucosa       | VBINeiMuc94085_1327  | Aspartate racemase EC 5.1.1.13                                                                            |
| Neisseria mucosa       | VBINeiMuc55442_1949  | ATP synthase beta chain EC 3.6.3.14                                                                       |
| Neisseria mucosa       | VBINeiMuc55442_0935  | ATP-dependent Clp protease ATP-binding subunit ClpA                                                       |
| Neisseria mucosa       | VBINeiMuc55442_0586  | ATP-dependent Clp protease ATP-binding subunit ClpA                                                       |
| Neisseria mucosa       | VBINeiMuc55442_0599  | ATP-dependent Clp protease ATP-binding subunit ClpA                                                       |
| Neisseria mucosa       | VBINeiMuc55442_0954  | ATP-dependent Clp protease ATP-binding subunit ClpA                                                       |
| Neisseria mucosa       | VBINeiMuc55442_2336  | ATP-dependent Clp protease ATP-binding subunit ClpA                                                       |
| Neisseria mucosa       | VBINeiMuc94085_1178  | ATP-dependent Clp protease ATP-binding subunit ClpA                                                       |
| Neisseria mucosa       | VBINeiMuc55442_2338  | ATP-dependent Clp protease ATP-binding subunit ClpA                                                       |
| Neisseria mucosa       | VBINeiMuc94085_1179  | ATP-dependent Clp protease ATP-binding subunit ClpA                                                       |
| Neisseria mucosa       | VBINeiMuc55442_1876  | Capsular polysaccharide ABC transporter 2C permease protein KpsM                                          |
| Neisseria mucosa       | VBINeiMuc55442_1805  | Capsular polysaccharide biosynthesis export periplasmic protein WcbA                                      |
| Neisseria mucosa       | VBINeiMuc55442_1799  | Capsular polysaccharide export system protein KpsS                                                        |
| Neisseria mucosa       | VBINeiMuc94085_1905  | Cell division transporter 2C ATP-binding protein FtsE TC 3.A.5.1.1                                        |
| Neisseria mucosa       | VBINeiMuc94085_1312  | Cell division trigger factor EC 5.2.1.8                                                                   |
| Neisseria mucosa       | VBINeiMuc55442_2408  | ClpB protein                                                                                              |
| Neisseria mucosa       | VBINeiMuc94085_1309  | ClpB protein                                                                                              |
| Neisseria mucosa       | VBINeiMuc94085_0910  | Copper-sensing two-component system response regulator CpxR                                               |
| Neisseria mucosa       | VBINeiMuc94085_1971  | D-glycero-D-manno-heptose 1 2C7-bisphosphate phosphatase EC 3.1.1.- 3B Histidinol-phosphatase EC 3.1.3.15 |
| Neisseria mucosa       | VBINeiMuc94085_0778  | Dipeptide transport ATP-binding protein DppD TC 3.A.1.5.2                                                 |
| Neisseria mucosa       | VBINeiMuc94085_0768  | Dipeptide transport ATP-binding protein DppD TC 3.A.1.5.2                                                 |
| Neisseria mucosa       | VBINeiMuc55442_1833  | dTDP-4-dehydrorhamnose 3 2C5-epimerase EC 5.1.3.13                                                        |
| Neisseria mucosa       | VBINeiMuc94085_0758  | dTDP-glucose 4 2C6-dehydratase EC 4.2.1.46                                                                |
| Neisseria mucosa       | VBINeiMuc94085_1473  | Enolase EC 4.2.1.11                                                                                       |
| Neisseria mucosa       | VBINeiMuc55442_1916  | Ferric anguibactin transport system permease protein fatD                                                 |
| Neisseria mucosa       | VBINeiMuc94085_1693  | Ferric anguibactin transport system permease protein fatD                                                 |
| Neisseria mucosa       | VBINeiMuc55442_0269  | Ferric anguibactin-binding protein                                                                        |
| Neisseria mucosa       | VBINeiMuc55442_0003  | Ferric anguibactin-binding protein                                                                        |
| Neisseria mucosa       | VBINeiMuc55442_2656  | Ferrichrome-iron receptor                                                                                 |
| Neisseria mucosa       | VBINeiMuc94085_0961  | Ferrichrome-iron receptor                                                                                 |
| Neisseria mucosa       | VBINeiMuc94085_1326  | Ferrous iron transport protein B                                                                          |
| Neisseria mucosa       | VBINeiMuc55442_2380  | FrpA C-related protein                                                                                    |
| Neisseria mucosa       | VBINeiMuc55442_2089  | FrpA C-related protein                                                                                    |
| Neisseria mucosa       | VBINeiMuc94085_1671  | Glucose-1-phosphate thymidyltransferase EC 2.7.7.24                                                       |
| Neisseria mucosa       | VBINeiMuc55442_1861  | Glucose-1-phosphate thymidyltransferase EC 2.7.7.24                                                       |
| Neisseria mucosa       | VBINeiMuc55442_0779  | Glucose-6-phosphate isomerase EC 5.3.1.9                                                                  |
| Neisseria mucosa       | VBINeiMuc94085_1058  | Glutamine synthetase type I EC 6.3.1.2                                                                    |

Table S8

|                  |                     |                                                                                                                     |
|------------------|---------------------|---------------------------------------------------------------------------------------------------------------------|
| Neisseria mucosa | VBINeiMuc55442_1666 | Glutamine synthetase type I EC 6.3.1.2                                                                              |
| Neisseria mucosa | VBINeiMuc55442_0864 | Glutamine synthetase type I EC 6.3.1.2                                                                              |
| Neisseria mucosa | VBINeiMuc55442_2509 | GTP pyrophosphokinase EC 2.7.6.5 2C pppGpp synthetase I                                                             |
| Neisseria mucosa | VBINeiMuc55442_0868 | GTP pyrophosphokinase EC 2.7.6.5 2C pppGpp synthetase I                                                             |
| Neisseria mucosa | VBINeiMuc94085_2055 | Heat shock protein 60 family chaperone GroEL                                                                        |
| Neisseria mucosa | VBINeiMuc55442_0712 | Heat shock protein 60 family chaperone GroEL                                                                        |
| Neisseria mucosa | VBINeiMuc55442_1948 | Heat shock protein 60 family chaperone GroEL                                                                        |
| Neisseria mucosa | VBINeiMuc55442_1466 | Heat shock protein 60 family chaperone GroEL                                                                        |
| Neisseria mucosa | VBINeiMuc94085_0030 | Heat shock protein 60 family chaperone GroEL                                                                        |
| Neisseria mucosa | VBINeiMuc55442_2381 | Hemolysin-type calcium-binding region                                                                               |
| Neisseria mucosa | VBINeiMuc94085_0482 | Hemolysin-type calcium-binding region                                                                               |
| Neisseria mucosa | VBINeiMuc94085_0531 | Hemolysin-type calcium-binding region                                                                               |
| Neisseria mucosa | VBINeiMuc94085_0475 | Hemolysin-type calcium-binding region                                                                               |
| Neisseria mucosa | VBINeiMuc94085_1405 | hypothetical protein                                                                                                |
| Neisseria mucosa | VBINeiMuc55442_2301 | hypothetical protein                                                                                                |
| Neisseria mucosa | VBINeiMuc94085_1347 | hypothetical protein                                                                                                |
| Neisseria mucosa | VBINeiMuc94085_1346 | hypothetical protein                                                                                                |
| Neisseria mucosa | VBINeiMuc94085_0305 | hypothetical protein                                                                                                |
| Neisseria mucosa | VBINeiMuc94085_1421 | hypothetical protein                                                                                                |
| Neisseria mucosa | VBINeiMuc94085_1493 | Iron (III) dicitrate transport system permease protein FecD TC 3.A.1.14.1                                           |
| Neisseria mucosa | VBINeiMuc55442_1219 | iron-regulated outer membrane protein FrpB                                                                          |
| Neisseria mucosa | VBINeiMuc55442_1945 | iron-regulated outer membrane protein FrpB                                                                          |
| Neisseria mucosa | VBINeiMuc55442_2676 | iron-regulated outer membrane protein FrpB                                                                          |
| Neisseria mucosa | VBINeiMuc55442_1195 | Lipid A export ATP-binding permease protein MsbA EC 3.6.3.25                                                        |
| Neisseria mucosa | VBINeiMuc94085_0951 | Lipid A export ATP-binding permease protein MsbA EC 3.6.3.25                                                        |
| Neisseria mucosa | VBINeiMuc94085_0761 | Long-chain-fatty-acid--CoA ligase EC 6.2.1.3                                                                        |
| Neisseria mucosa | VBINeiMuc94085_1162 | Magnesium and cobalt efflux protein CorC                                                                            |
| Neisseria mucosa | VBINeiMuc94085_1261 | Membrane-associated zinc metalloprotease                                                                            |
| Neisseria mucosa | VBINeiMuc94085_1612 | Membrane-bound lytic murein transglycosylase B precursor EC 3.2.1.-                                                 |
| Neisseria mucosa | VBINeiMuc94085_1885 | MotA TolQ ExbB proton channel family protein                                                                        |
| Neisseria mucosa | VBINeiMuc94085_1228 | NADH-ubiquinone oxidoreductase chain G EC 1.6.5.3                                                                   |
| Neisseria mucosa | VBINeiMuc94085_0691 | NADH-ubiquinone oxidoreductase chain G EC 1.6.5.3                                                                   |
| Neisseria mucosa | VBINeiMuc55442_1222 | NADH-ubiquinone oxidoreductase chain G EC 1.6.5.3                                                                   |
| Neisseria mucosa | VBINeiMuc55442_0838 | NADH-ubiquinone oxidoreductase chain G EC 1.6.5.3                                                                   |
| Neisseria mucosa | VBINeiMuc55442_1720 | NADH-ubiquinone oxidoreductase chain G EC 1.6.5.3                                                                   |
| Neisseria mucosa | VBINeiMuc55442_0106 | NADH-ubiquinone oxidoreductase chain G EC 1.6.5.3                                                                   |
| Neisseria mucosa | VBINeiMuc94085_1345 | Nitrogen regulation protein NtrX                                                                                    |
| Neisseria mucosa | VBINeiMuc94085_0914 | Nitrous oxide reductase maturation protein NosF ATPase                                                              |
| Neisseria mucosa | VBINeiMuc94085_1225 | Oligopeptide ABC transporter 2C periplasmic oligopeptide-binding protein OppA TC 3.A.1.5.1                          |
| Neisseria mucosa | VBINeiMuc94085_1598 | Outer membrane protein A precursor                                                                                  |
| Neisseria mucosa | VBINeiMuc55442_0869 | Outer membrane receptor for ferric coprogen and ferric-rhodotorulic acid                                            |
| Neisseria mucosa | VBINeiMuc55442_1092 | Outer membrane receptor for ferric coprogen and ferric-rhodotorulic acid                                            |
| Neisseria mucosa | VBINeiMuc94085_0099 | Outer membrane receptor for ferric coprogen and ferric-rhodotorulic acid                                            |
| Neisseria mucosa | VBINeiMuc55442_0130 | Outer membrane receptor for ferric coprogen and ferric-rhodotorulic acid                                            |
| Neisseria mucosa | VBINeiMuc94085_1723 | Outer membrane receptor for ferric coprogen and ferric-rhodotorulic acid                                            |
| Neisseria mucosa | VBINeiMuc55442_1236 | Outer membrane receptor for ferric coprogen and ferric-rhodotorulic acid                                            |
| Neisseria mucosa | VBINeiMuc94085_0321 | Outer membrane receptor for lactoferrin or transferrin 2C lipoprotein B                                             |
| Neisseria mucosa | VBINeiMuc94085_0349 | Outer membrane receptor for lactoferrin or transferrin 2C lipoprotein B                                             |
| Neisseria mucosa | VBINeiMuc55442_1011 | Outer membrane receptor for lactoferrin or transferrin 2C lipoprotein B                                             |
| Neisseria mucosa | VBINeiMuc55442_1007 | Outer membrane receptor for lactoferrin or transferrin 2C lipoprotein B                                             |
| Neisseria mucosa | VBINeiMuc55442_1719 | Outer membrane receptor for lactoferrin or transferrin 2C lipoprotein B                                             |
| Neisseria mucosa | VBINeiMuc55442_1718 | Outer membrane receptor for lactoferrin or transferrin 2C lipoprotein B                                             |
| Neisseria mucosa | VBINeiMuc55442_0961 | Outer membrane receptor for lactoferrin or transferrin 2C TonB-dependent protein A                                  |
| Neisseria mucosa | VBINeiMuc94085_0365 | Outer membrane receptor for lactoferrin or transferrin 2C TonB-dependent protein A                                  |
| Neisseria mucosa | VBINeiMuc55442_0522 | Outer membrane receptor for lactoferrin or transferrin 2C TonB-dependent protein A                                  |
| Neisseria mucosa | VBINeiMuc55442_2499 | Outer membrane receptor for lactoferrin or transferrin 2C TonB-dependent protein A                                  |
| Neisseria mucosa | VBINeiMuc55442_2079 | Porphobilinogen deaminase EC 2.5.1.61                                                                               |
| Neisseria mucosa | VBINeiMuc94085_0240 | Porphobilinogen deaminase EC 2.5.1.61                                                                               |
| Neisseria mucosa | VBINeiMuc55442_0691 | probable integral membrane protein NMA0408                                                                          |
| Neisseria mucosa | VBINeiMuc55442_0702 | probable integral membrane protein NMA0408                                                                          |
| Neisseria mucosa | VBINeiMuc94085_1314 | Probable polybeta-D-mannuronate O-acetylase EC 2.3.1.-                                                              |
| Neisseria mucosa | VBINeiMuc94085_0612 | Protein export cytoplasm protein SecA ATPase RNA helicase TC 3.A.5.1.1                                              |
| Neisseria mucosa | VBINeiMuc94085_1227 | Protein export cytoplasm protein SecA ATPase RNA helicase TC 3.A.5.1.1                                              |
| Neisseria mucosa | VBINeiMuc55442_1909 | putative capsule biosynthesis protein                                                                               |
| Neisseria mucosa | VBINeiMuc55442_2013 | Putative large exoprotein involved in heme utilization or adhesion of ShIA HecA FhaA family                         |
| Neisseria mucosa | VBINeiMuc55442_1691 | Putative large exoprotein involved in heme utilization or adhesion of ShIA HecA FhaA family                         |
| Neisseria mucosa | VBINeiMuc94085_1551 | Putative periplasmic substrate-binding transport protein                                                            |
| Neisseria mucosa | VBINeiMuc94085_0786 | Putative Ton-B dependent hemine receptor                                                                            |
| Neisseria mucosa | VBINeiMuc94085_1740 | Pyridoxamine 5'-phosphate oxidase EC 1.4.3.5                                                                        |
| Neisseria mucosa | VBINeiMuc55442_1012 | Radical SAM family enzyme 2C similar to coproporphyrinogen III oxidase 2C oxygen-independent 2C clustered with nucl |
| Neisseria mucosa | VBINeiMuc94085_0867 | RNA polymerase sigma factor RpoD                                                                                    |
| Neisseria mucosa | VBINeiMuc94085_0134 | Serine protease precursor MucD AlgY associated with sigma factor RpoE                                               |
| Neisseria mucosa | VBINeiMuc55442_0324 | Serine protease precursor MucD AlgY associated with sigma factor RpoE                                               |
| Neisseria mucosa | VBINeiMuc55442_2047 | Serine protease precursor MucD AlgY associated with sigma factor RpoE                                               |
| Neisseria mucosa | VBINeiMuc94085_1670 | sigma-54 dependent response regulator                                                                               |
| Neisseria mucosa | VBINeiMuc94085_1618 | Sulfate and thiosulfate import ATP-binding protein CysA EC 3.6.3.25                                                 |
| Neisseria mucosa | VBINeiMuc94085_1153 | TonB-dependent siderophore receptor                                                                                 |
| Neisseria mucosa | VBINeiMuc55442_1363 | Translation elongation factor Tu                                                                                    |
| Neisseria mucosa | VBINeiMuc55442_1750 | Translation elongation factor Tu                                                                                    |

Table S8

|                         |                      |                                                                                                             |
|-------------------------|----------------------|-------------------------------------------------------------------------------------------------------------|
| Neisseria mucosa        | VBINeiMuc94085_0706  | Translation elongation factor Tu                                                                            |
| Neisseria mucosa        | VBINeiMuc55442_1740  | Translation elongation factor Tu                                                                            |
| Neisseria mucosa        | VBINeiMuc94085_0704  | Translation elongation factor Tu                                                                            |
| Neisseria mucosa        | VBINeiMuc55442_0859  | Translation elongation factor Tu                                                                            |
| Neisseria mucosa        | VBINeiMuc94085_1904  | Twitching motility protein PilT                                                                             |
| Neisseria mucosa        | VBINeiMuc94085_1887  | Twitching motility protein PilT                                                                             |
| Neisseria mucosa        | VBINeiMuc94085_1423  | Twitching motility protein PilT                                                                             |
| Neisseria mucosa        | VBINeiMuc94085_1886  | Type IV fimbrial biogenesis protein PilY1                                                                   |
| Neisseria mucosa        | VBINeiMuc94085_1681  | Type IV pilus biogenesis protein PilM                                                                       |
| Neisseria mucosa        | VBINeiMuc94085_1678  | Type IV pilus biogenesis protein PilN                                                                       |
| Neisseria mucosa        | VBINeiMuc94085_1672  | Type IV pilus biogenesis protein PilQ                                                                       |
| Neisseria mucosa        | VBINeiMuc94085_1289  | UDP-3-O-3-hydroxymyristoyl glucosamine N-acyltransferase EC 2.3.1.-                                         |
| Neisseria mucosa        | VBINeiMuc94085_1639  | UDP-3-O-3-hydroxymyristoyl N-acetylglucosamine deacetylase EC 3.5.1.-                                       |
| Neisseria mucosa        | VBINeiMuc55442_0047  | UDP-N-acetylglucosamine 4 C2C6-dehydratase EC 4.2.1.-                                                       |
| Neisseria mucosa        | VBINeiMuc55442_1992  | UDP-N-acetylglucosamine 4 C2C6-dehydratase EC 4.2.1.-                                                       |
| Neisseria mucosa        | VBINeiMuc94085_1579  | Uncharacterized protein ImpD                                                                                |
| Neisseria mucosa        | VBINeiMuc94085_1231  | Undecaprenyl pyrophosphate synthetase EC 2.5.1.31                                                           |
| Neisseria mucosa        | VBINeiMuc55442_2327  | Uroporphyrinogen III decarboxylase EC 4.1.1.37                                                              |
| Neisseria mucosa        | VBINeiMuc94085_1724  | UTP--glucose-1-phosphate uridylyltransferase EC 2.7.7.9                                                     |
| Neisseria mucosa        | VBINeiMuc94085_1578  | VgrG protein                                                                                                |
| Neisseria polysaccharea | VBINeiPol102132_1110 | 3-deoxy-manno-octulosonate cytidyltransferase EC 2.7.7.38                                                   |
| Neisseria polysaccharea | VBINeiPol177493_0629 | 3-isopropylmalate dehydratase small subunit EC 4.2.1.33                                                     |
| Neisseria polysaccharea | VBINeiPol177493_0509 | 3-oxoacyl-ACP reductase EC 1.1.1.100                                                                        |
| Neisseria polysaccharea | VBINeiPol177493_2144 | Adenosylmethionine-8-amino-7-oxononanoate aminotransferase EC 2.6.1.62                                      |
| Neisseria polysaccharea | VBINeiPol177493_1838 | ADP-heptose--lipooligosaccharide heptosyltransferase II EC 2.4.1.-                                          |
| Neisseria polysaccharea | VBINeiPol102132_0829 | Alkaline phosphatase EC 3.1.3.1                                                                             |
| Neisseria polysaccharea | VBINeiPol102132_0803 | Alkaline phosphatase EC 3.1.3.1                                                                             |
| Neisseria polysaccharea | VBINeiPol102132_1303 | ATP-dependent Clp protease ATP-binding subunit ClpA                                                         |
| Neisseria polysaccharea | VBINeiPol102132_2131 | ATP-dependent Clp protease ATP-binding subunit ClpA                                                         |
| Neisseria polysaccharea | VBINeiPol177493_0706 | ATPase provides energy for both assembly of type IV secretion complex and secretion of T-DNA complex VirB11 |
| Neisseria polysaccharea | VBINeiPol177493_0834 | Cell division trigger factor EC 5.2.1.8                                                                     |
| Neisseria polysaccharea | VBINeiPol177493_0992 | ClpB protein                                                                                                |
| Neisseria polysaccharea | VBINeiPol102132_0604 | Diaminopimelate decarboxylase EC 4.1.1.20                                                                   |
| Neisseria polysaccharea | VBINeiPol177493_0396 | Enolase EC 4.2.1.11                                                                                         |
| Neisseria polysaccharea | VBINeiPol177493_1192 | Ferrous iron transport protein B                                                                            |
| Neisseria polysaccharea | VBINeiPol102132_0886 | Glucose-6-phosphate isomerase EC 5.3.1.9                                                                    |
| Neisseria polysaccharea | VBINeiPol177493_2360 | GTP pyrophosphokinase EC 2.7.6.5 2C pppGpp synthetase I                                                     |
| Neisseria polysaccharea | VBINeiPol177493_1983 | Hemolysin                                                                                                   |
| Neisseria polysaccharea | VBINeiPol177493_0431 | Lipid A export ATP-binding permease protein MsbA EC 3.6.3.25                                                |
| Neisseria polysaccharea | VBINeiPol102132_1073 | Long-chain-fatty-acid--CoA ligase EC 6.2.1.3                                                                |
| Neisseria polysaccharea | VBINeiPol102132_0677 | Membrane-bound lytic murein transglycosylase B precursor EC 3.2.1.-                                         |
| Neisseria polysaccharea | VBINeiPol102132_0477 | Outer membrane hemoglobin-haptoglobin utilization protein HpuB                                              |
| Neisseria polysaccharea | VBINeiPol177493_0398 | Outer membrane receptor proteins 2C mostly Fe transport                                                     |
| Neisseria polysaccharea | VBINeiPol102132_0326 | Outer membrane receptor proteins 2C mostly Fe transport                                                     |
| Neisseria polysaccharea | VBINeiPol177493_2071 | Pantoate--beta-alanine ligase EC 6.3.2.1                                                                    |
| Neisseria polysaccharea | VBINeiPol102132_0569 | Phosphoheptose isomerase EC 5.3.1.-                                                                         |
| Neisseria polysaccharea | VBINeiPol177493_1238 | Porphobilinogen synthase EC 4.2.1.24                                                                        |
| Neisseria polysaccharea | VBINeiPol177493_1967 | Putative two-domain glycosyltransferase                                                                     |
| Neisseria polysaccharea | VBINeiPol177493_0628 | Pyridoxamine 5'-phosphate oxidase EC 1.4.3.5                                                                |
| Neisseria polysaccharea | VBINeiPol102132_0675 | Respiratory nitrate reductase beta chain EC 1.7.99.4                                                        |
| Neisseria polysaccharea | VBINeiPol177493_1278 | Superoxide dismutase Fe EC 1.15.1.1                                                                         |
| Neisseria polysaccharea | VBINeiPol177493_1134 | TETRATRICOPEPTIDE REPEAT FAMILY PROTEIN                                                                     |
| Neisseria polysaccharea | VBINeiPol177493_0707 | Type IV secretion system protein VirD4                                                                      |
| Neisseria polysaccharea | VBINeiPol102132_0462 | Zinc ABC transporter 2C periplasmic-binding protein ZnuA                                                    |
| Neisseria sicca         | VBINeiSic1915_0595   | 2-Keto-3-deoxy-D-manno-octulosonate-8-phosphate synthase EC 2.5.1.55                                        |
| Neisseria sicca         | VBINeiSic1915_2308   | 2-Keto-3-deoxy-D-manno-octulosonate-8-phosphate synthase EC 2.5.1.55                                        |
| Neisseria sicca         | VBINeiSic181086_0676 | 3-deoxy-D-manno-octulosonic-acid transferase EC 2.-.-.-                                                     |
| Neisseria sicca         | VBINeiSic1915_0991   | 3-deoxy-manno-octulosonate cytidyltransferase EC 2.7.7.38                                                   |
| Neisseria sicca         | VBINeiSic1915_2183   | 3-deoxy-manno-octulosonate cytidyltransferase EC 2.7.7.38                                                   |
| Neisseria sicca         | VBINeiSic1915_2888   | 3-oxoacyl-ACP reductase EC 1.1.1.100                                                                        |
| Neisseria sicca         | VBINeiSic1915_2589   | 3-oxoacyl-acyl-carrier protein reductase EC 1.1.1.100                                                       |
| Neisseria sicca         | VBINeiSic181086_0994 | 3-oxoacyl-acyl-carrier-protein synthase 2C KASII EC 2.3.1.41                                                |
| Neisseria sicca         | VBINeiSic1915_0325   | 3-oxoacyl-acyl-carrier-protein synthase 2C KASII EC 2.3.1.41                                                |
| Neisseria sicca         | VBINeiSic181086_0502 | 3R-hydroxymyristoyl-acyl carrier protein dehydratase EC 4.2.1.-                                             |
| Neisseria sicca         | VBINeiSic181086_2378 | 4-keto-6-deoxy-N-Acetyl-D-hexosaminyL-Lipid carrier aminotransferase                                        |
| Neisseria sicca         | VBINeiSic1915_1401   | 4-keto-6-deoxy-N-Acetyl-D-hexosaminyL-Lipid carrier aminotransferase                                        |
| Neisseria sicca         | VBINeiSic1915_0658   | ABC transporter 2C ATP-binding protein                                                                      |
| Neisseria sicca         | VBINeiSic1915_1897   | ABC transporter 2C ATP-binding protein                                                                      |
| Neisseria sicca         | VBINeiSic1915_0461   | ABC transporter 2C ATP-binding protein                                                                      |
| Neisseria sicca         | VBINeiSic181086_2525 | ABC transporter 2C ATP-binding protein                                                                      |
| Neisseria sicca         | VBINeiSic1915_2697   | ABC transporter 2C transmembrane regionABC transporterPeptidase C39 2C bacteriocin processing               |
| Neisseria sicca         | VBINeiSic1915_0704   | ABC-transport system ATP-binding protein                                                                    |
| Neisseria sicca         | VBINeiSic1915_1403   | ABC-type Fe3+-hydroxamate transport system 2C periplasmic component                                         |
| Neisseria sicca         | VBINeiSic1915_2021   | ABC-type Fe3+-hydroxamate transport system 2C periplasmic component                                         |
| Neisseria sicca         | VBINeiSic181086_0745 | ABC-type Fe3+-hydroxamate transport system 2C periplasmic component                                         |
| Neisseria sicca         | VBINeiSic1915_1868   | ABC-type multidrug transport system 2C permease component                                                   |
| Neisseria sicca         | VBINeiSic1915_1867   | ABC-type multidrug transport system 2C permease component                                                   |
| Neisseria sicca         | VBINeiSic1915_2690   | Acetylornithine aminotransferase EC 2.6.1.11                                                                |
| Neisseria sicca         | VBINeiSic181086_0526 | Acyl-acyl-carrier-protein--UDP-N- acetylglucosamine O-acyltransferase EC 2.3.1.129                          |

Table S8

|                 |                      |                                                                                   |
|-----------------|----------------------|-----------------------------------------------------------------------------------|
| Neisseria sicca | VBINeiSic1915_0840   | Adenosylmethionine-8-amino-7-oxononoate aminotransferase EC 2.6.1.62              |
| Neisseria sicca | VBINeiSic1915_0291   | Adenosylmethionine-8-amino-7-oxononoate aminotransferase EC 2.6.1.62              |
| Neisseria sicca | VBINeiSic1915_2154   | ADP-heptose synthase EC 2.7.-.- D-glycero-beta-D-manno-heptose 7-phosphate kinase |
| Neisseria sicca | VBINeiSic1915_2149   | ADP-L-glycero-D-manno-heptose-6-epimerase EC 5.1.3.20                             |
| Neisseria sicca | VBINeiSic1915_0268   | ADP-L-glycero-D-manno-heptose-6-epimerase EC 5.1.3.20                             |
| Neisseria sicca | VBINeiSic1915_1011   | ADP-L-glycero-D-manno-heptose-6-epimerase EC 5.1.3.20                             |
| Neisseria sicca | VBINeiSic1915_2743   | Alcohol dehydrogenase EC 1.1.1.1 3B Acetaldehyde dehydrogenase EC 1.2.1.10        |
| Neisseria sicca | VBINeiSic1915_1058   | Alcohol dehydrogenase EC 1.1.1.1 3B Acetaldehyde dehydrogenase EC 1.2.1.10        |
| Neisseria sicca | VBINeiSic181086_1241 | Alcohol dehydrogenase EC 1.1.1.1 3B Acetaldehyde dehydrogenase EC 1.2.1.10        |
| Neisseria sicca | VBINeiSic1915_0550   | Anthranilate synthase 2C aminase component EC 4.1.3.27                            |
| Neisseria sicca | VBINeiSic1915_1420   | Anthranilate synthase 2C aminase component EC 4.1.3.27                            |
| Neisseria sicca | VBINeiSic181086_2522 | Arabinose 5-phosphate isomerase EC 5.3.1.13                                       |
| Neisseria sicca | VBINeiSic181086_1243 | Arabinose 5-phosphate isomerase EC 5.3.1.13                                       |
| Neisseria sicca | VBINeiSic1915_2733   | Arabinose 5-phosphate isomerase EC 5.3.1.13                                       |
| Neisseria sicca | VBINeiSic1915_2274   | Aspartate 1-decarboxylase EC 4.1.1.11                                             |
| Neisseria sicca | VBINeiSic1915_0712   | ATP synthase alpha chain EC 3.6.3.14                                              |
| Neisseria sicca | VBINeiSic181086_2563 | ATP synthase alpha chain EC 3.6.3.14                                              |
| Neisseria sicca | VBINeiSic181086_1055 | ATP synthase alpha chain EC 3.6.3.14                                              |
| Neisseria sicca | VBINeiSic181086_1088 | ATP synthase beta chain EC 3.6.3.14                                               |
| Neisseria sicca | VBINeiSic1915_0717   | ATP synthase beta chain EC 3.6.3.14                                               |
| Neisseria sicca | VBINeiSic1915_0021   | ATP synthase beta chain EC 3.6.3.14                                               |
| Neisseria sicca | VBINeiSic1915_1225   | ATP-dependent Clp protease ATP-binding subunit ClpA                               |
| Neisseria sicca | VBINeiSic1915_1818   | ATP-dependent Clp protease ATP-binding subunit ClpA                               |
| Neisseria sicca | VBINeiSic1915_0267   | ATP-dependent Clp protease ATP-binding subunit ClpA                               |
| Neisseria sicca | VBINeiSic1915_1805   | ATP-dependent Clp protease ATP-binding subunit ClpA                               |
| Neisseria sicca | VBINeiSic1915_1223   | ATP-dependent Clp protease ATP-binding subunit ClpA                               |
| Neisseria sicca | VBINeiSic1915_0255   | ATP-dependent Clp protease ATP-binding subunit ClpA                               |
| Neisseria sicca | VBINeiSic181086_1334 | Biopolymer transport protein ExbD TolR                                            |
| Neisseria sicca | VBINeiSic181086_0839 | Capsular polysaccharide export system protein KpsC                                |
| Neisseria sicca | VBINeiSic181086_0798 | Capsular polysaccharide export system protein KpsC                                |
| Neisseria sicca | VBINeiSic1915_2212   | CDP-6-deoxy-delta-3 2C4-glucoseen reductase-like                                  |
| Neisseria sicca | VBINeiSic1915_0639   | ClpB protein                                                                      |
| Neisseria sicca | VBINeiSic1915_0096   | ClpB protein                                                                      |
| Neisseria sicca | VBINeiSic181086_1853 | Copper-sensing two-component system response regulator CpxR                       |
| Neisseria sicca | VBINeiSic181086_1154 | Diaminopimelate decarboxylase EC 4.1.1.20                                         |
| Neisseria sicca | VBINeiSic181086_0990 | dTDP-4-dehydrorhamnose 3 2C5-epimerase EC 5.1.3.13                                |
| Neisseria sicca | VBINeiSic181086_0993 | dTDP-glucose 4 2C6-dehydratase EC 4.2.1.46                                        |
| Neisseria sicca | VBINeiSic1915_2637   | Enolase EC 4.2.1.11                                                               |
| Neisseria sicca | VBINeiSic1915_0914   | Ferric anguibactin transport system permease protein fatD                         |
| Neisseria sicca | VBINeiSic1915_1090   | Ferric anguibactin-binding protein                                                |
| Neisseria sicca | VBINeiSic1915_1173   | Ferrichrome transport ATP-binding protein FhuC TC 3.A.1.14.3                      |
| Neisseria sicca | VBINeiSic1915_1419   | Ferrous iron transport protein B                                                  |
| Neisseria sicca | VBINeiSic1915_0560   | FIG00698529 hypothetical protein                                                  |
| Neisseria sicca | VBINeiSic1915_0559   | FIG00698529 hypothetical protein                                                  |
| Neisseria sicca | VBINeiSic1915_0551   | FIG00698529 hypothetical protein                                                  |
| Neisseria sicca | VBINeiSic181086_1092 | FIG00848649 hypothetical protein                                                  |
| Neisseria sicca | VBINeiSic181086_0235 | Gamma-glutamyltranspeptidase EC 2.3.2.2                                           |
| Neisseria sicca | VBINeiSic1915_1560   | Gamma-glutamyltranspeptidase EC 2.3.2.2                                           |
| Neisseria sicca | VBINeiSic1915_1616   | Glucose-1-phosphate thymidyltransferase EC 2.7.7.24                               |
| Neisseria sicca | VBINeiSic181086_0992 | Glucose-1-phosphate thymidyltransferase EC 2.7.7.24                               |
| Neisseria sicca | VBINeiSic1915_2492   | Glutamine synthetase type I EC 6.3.1.2                                            |
| Neisseria sicca | VBINeiSic1915_0134   | Glutamine synthetase type I EC 6.3.1.2                                            |
| Neisseria sicca | VBINeiSic181086_1448 | Glutamine synthetase type I EC 6.3.1.2                                            |
| Neisseria sicca | VBINeiSic181086_1573 | Glutaryl-tRNA reductase EC 1.2.1.70                                               |
| Neisseria sicca | VBINeiSic1915_2399   | Glycerol-3-phosphate cytidyltransferase EC 2.7.7.39                               |
| Neisseria sicca | VBINeiSic1915_0996   | Glycerol-3-phosphate cytidyltransferase EC 2.7.7.39                               |
| Neisseria sicca | VBINeiSic1915_2738   | GTP pyrophosphokinase EC 2.7.6.5 2C pppGpp synthetase I                           |
| Neisseria sicca | VBINeiSic1915_1586   | GTP pyrophosphokinase EC 2.7.6.5 2C pppGpp synthetase I                           |
| Neisseria sicca | VBINeiSic181086_2382 | Heat shock protein 60 family chaperone GroEL                                      |
| Neisseria sicca | VBINeiSic1915_0521   | Heat shock protein 60 family chaperone GroEL                                      |
| Neisseria sicca | VBINeiSic1915_1900   | Heat shock protein 60 family chaperone GroEL                                      |
| Neisseria sicca | VBINeiSic1915_1899   | Heat shock protein 60 family chaperone GroEL                                      |
| Neisseria sicca | VBINeiSic1915_2683   | hypothetical protein                                                              |
| Neisseria sicca | VBINeiSic1915_2639   | hypothetical protein                                                              |
| Neisseria sicca | VBINeiSic1915_2659   | hypothetical protein                                                              |
| Neisseria sicca | VBINeiSic1915_2642   | hypothetical protein                                                              |
| Neisseria sicca | VBINeiSic1915_0844   | Iron (III) dicitrate transport ATP-binding protein FecE TC 3.A.1.14.1             |
| Neisseria sicca | VBINeiSic1915_2009   | Iron (III) dicitrate transport ATP-binding protein FecE TC 3.A.1.14.1             |
| Neisseria sicca | VBINeiSic181086_0690 | Iron (III) dicitrate transport system permease protein FecD TC 3.A.1.14.1         |
| Neisseria sicca | VBINeiSic1915_2011   | Iron (III) dicitrate transport system permease protein FecD TC 3.A.1.14.1         |
| Neisseria sicca | VBINeiSic1915_0879   | Iron compound ABC uptake transporter permease protein PiuC                        |
| Neisseria sicca | VBINeiSic181086_2427 | Iron compound ABC uptake transporter substrate-binding protein PiuA               |
| Neisseria sicca | VBINeiSic1915_1169   | iron-regulated outer membrane protein FrpB                                        |
| Neisseria sicca | VBINeiSic1915_2737   | Leader peptidase Prepilin peptidase EC 3.4.23.43 N-methyltransferase EC 2.1.1.-   |
| Neisseria sicca | VBINeiSic1915_1734   | Lipid A biosynthesis lauroyl acyltransferase EC 2.3.1.-                           |
| Neisseria sicca | VBINeiSic181086_0648 | Lipid-A-disaccharide synthase EC 2.4.1.182                                        |
| Neisseria sicca | VBINeiSic1915_1255   | Lipopolysaccharide ABC transporter 2C ATP-binding protein LptB                    |
| Neisseria sicca | VBINeiSic1915_2732   | Lipopolysaccharide ABC transporter 2C ATP-binding protein LptB                    |
| Neisseria sicca | VBINeiSic1915_0451   | Lipopolysaccharide heptosyltransferase I EC 2.4.1.-                               |

Table S8

|                 |                      |                                                                                                                      |
|-----------------|----------------------|----------------------------------------------------------------------------------------------------------------------|
| Neisseria sicca | VBINeiSic1915_0755   | Lipopolysaccharide heptosyltransferase I EC 2.4.1.-                                                                  |
| Neisseria sicca | VBINeiSic1915_2096   | Lipopolysaccharide heptosyltransferase I EC 2.4.1.-                                                                  |
| Neisseria sicca | VBINeiSic181086_0332 | Lipopolysaccharide heptosyltransferase I EC 2.4.1.-                                                                  |
| Neisseria sicca | VBINeiSic181086_1438 | Lipopolysaccharide heptosyltransferase III EC 2.4.1.-                                                                |
| Neisseria sicca | VBINeiSic1915_1445   | Long-chain-fatty-acid-CoA ligase EC 6.2.1.3                                                                          |
| Neisseria sicca | VBINeiSic1915_2745   | Long-chain-fatty-acid-CoA ligase EC 6.2.1.3                                                                          |
| Neisseria sicca | VBINeiSic1915_2813   | Macrophage infectivity potentiator GldI                                                                              |
| Neisseria sicca | VBINeiSic181086_0394 | Membrane-associated zinc metalloprotease                                                                             |
| Neisseria sicca | VBINeiSic1915_2765   | Membrane-bound lytic murein transglycosylase B precursor EC 3.2.1.-                                                  |
| Neisseria sicca | VBINeiSic1915_0973   | Methionine ABC transporter ATP-binding protein                                                                       |
| Neisseria sicca | VBINeiSic181086_1779 | Methionine ABC transporter ATP-binding protein                                                                       |
| Neisseria sicca | VBINeiSic181086_0303 | NAD-dependent glyceraldehyde-3-phosphate dehydrogenase EC 1.2.1.12                                                   |
| Neisseria sicca | VBINeiSic1915_2087   | NAD-dependent glyceraldehyde-3-phosphate dehydrogenase EC 1.2.1.12                                                   |
| Neisseria sicca | VBINeiSic1915_1568   | NAD-dependent glyceraldehyde-3-phosphate dehydrogenase EC 1.2.1.12                                                   |
| Neisseria sicca | VBINeiSic1915_0455   | NADH-ubiquinone oxidoreductase chain G EC 1.6.5.3                                                                    |
| Neisseria sicca | VBINeiSic1915_1099   | NADH-ubiquinone oxidoreductase chain G EC 1.6.5.3                                                                    |
| Neisseria sicca | VBINeiSic181086_2526 | NADH-ubiquinone oxidoreductase chain G EC 1.6.5.3                                                                    |
| Neisseria sicca | VBINeiSic181086_0367 | NADH-ubiquinone oxidoreductase chain G EC 1.6.5.3                                                                    |
| Neisseria sicca | VBINeiSic1915_2335   | NADPH-dependent glyceraldehyde-3-phosphate dehydrogenase EC 1.2.1.13                                                 |
| Neisseria sicca | VBINeiSic1915_1664   | Nitrogen regulation protein NtrX                                                                                     |
| Neisseria sicca | VBINeiSic1915_2725   | Nucleoside 5-triphosphatase RdgB dHATP 2C dITP 2C XTP-specific EC 3.6.1.15                                           |
| Neisseria sicca | VBINeiSic181086_2380 | Nucleoside-diphosphate sugar epimerase dehydratase                                                                   |
| Neisseria sicca | VBINeiSic1915_0878   | O-antigen acetylase                                                                                                  |
| Neisseria sicca | VBINeiSic1915_0812   | Oligopeptide ABC transporter 2C periplasmic oligopeptide-binding protein OppA TC 3.A.1.5.1                           |
| Neisseria sicca | VBINeiSic181086_2079 | Ornithine carbamoyltransferase EC 2.1.3.3                                                                            |
| Neisseria sicca | VBINeiSic1915_0407   | Ornithine carbamoyltransferase EC 2.1.3.3                                                                            |
| Neisseria sicca | VBINeiSic1915_2135   | Outer membrane hemoglobin utilization protein HmbR                                                                   |
| Neisseria sicca | VBINeiSic181086_2013 | Outer membrane protein A precursor                                                                                   |
| Neisseria sicca | VBINeiSic181086_0454 | Outer membrane protein assembly factor YaeT precursor                                                                |
| Neisseria sicca | VBINeiSic1915_1606   | Outer membrane protein class 1                                                                                       |
| Neisseria sicca | VBINeiSic181086_1464 | Outer membrane protein class 1                                                                                       |
| Neisseria sicca | VBINeiSic181086_1844 | Outer membrane protein class 1                                                                                       |
| Neisseria sicca | VBINeiSic181086_1272 | Outer membrane receptor for ferric coprogen and ferric-rhodotorulic acid                                             |
| Neisseria sicca | VBINeiSic1915_2744   | Outer membrane receptor for ferric coprogen and ferric-rhodotorulic acid                                             |
| Neisseria sicca | VBINeiSic1915_2260   | Outer membrane receptor for ferric coprogen and ferric-rhodotorulic acid                                             |
| Neisseria sicca | VBINeiSic1915_2628   | Outer membrane receptor for ferric coprogen and ferric-rhodotorulic acid                                             |
| Neisseria sicca | VBINeiSic1915_1882   | Outer membrane receptor for ferric coprogen and ferric-rhodotorulic acid                                             |
| Neisseria sicca | VBINeiSic1915_2224   | Outer membrane receptor for ferric coprogen and ferric-rhodotorulic acid                                             |
| Neisseria sicca | VBINeiSic181086_1302 | Outer membrane receptor for ferric coprogen and ferric-rhodotorulic acid                                             |
| Neisseria sicca | VBINeiSic1915_0293   | Outer membrane receptor for lactoferrin or transferrin 2C lipoprotein B                                              |
| Neisseria sicca | VBINeiSic1915_0296   | Outer membrane receptor for lactoferrin or transferrin 2C lipoprotein B                                              |
| Neisseria sicca | VBINeiSic1915_0292   | Outer membrane receptor for lactoferrin or transferrin 2C TonB-dependent protein A                                   |
| Neisseria sicca | VBINeiSic1915_0586   | Outer membrane receptor for lactoferrin or transferrin 2C TonB-dependent protein A                                   |
| Neisseria sicca | VBINeiSic1915_1901   | Outer membrane receptor proteins 2C mostly Fe transport                                                              |
| Neisseria sicca | VBINeiSic1915_1819   | Pantoate-beta-alanine ligase EC 6.3.2.1                                                                              |
| Neisseria sicca | VBINeiSic1915_0270   | Phosphoglucomutase EC 5.4.2.2                                                                                        |
| Neisseria sicca | VBINeiSic181086_2561 | Phosphoglucomutase EC 5.4.2.2                                                                                        |
| Neisseria sicca | VBINeiSic1915_1728   | Phosphoglucosamine mutase EC 5.4.2.10                                                                                |
| Neisseria sicca | VBINeiSic181086_2550 | Phosphoribosylaminoimidazole-succinocarboxamide synthase EC 6.3.2.6                                                  |
| Neisseria sicca | VBINeiSic1915_0587   | Porphobilinogen deaminase EC 2.5.1.61                                                                                |
| Neisseria sicca | VBINeiSic181086_1753 | Porphobilinogen deaminase EC 2.5.1.61                                                                                |
| Neisseria sicca | VBINeiSic181086_0675 | Proposed peptidoglycan lipid II flippase MurJ                                                                        |
| Neisseria sicca | VBINeiSic1915_0449   | Protein export cytoplasm protein SecA ATPase RNA helicase TC 3.A.5.1.1                                               |
| Neisseria sicca | VBINeiSic1915_1558   | Protein export cytoplasm protein SecA ATPase RNA helicase TC 3.A.5.1.1                                               |
| Neisseria sicca | VBINeiSic181086_2264 | Protein export cytoplasm protein SecA ATPase RNA helicase TC 3.A.5.1.1                                               |
| Neisseria sicca | VBINeiSic1915_0721   | Putative HlyD family secretion protein                                                                               |
| Neisseria sicca | VBINeiSic1915_2699   | Putative HlyD family secretion protein                                                                               |
| Neisseria sicca | VBINeiSic181086_0342 | Putative periplasmic substrate-binding transport protein                                                             |
| Neisseria sicca | VBINeiSic1915_2010   | Putative periplasmic substrate-binding transport protein                                                             |
| Neisseria sicca | VBINeiSic1915_2859   | Pyridoxamine 5'-phosphate oxidase EC 1.4.3.5                                                                         |
| Neisseria sicca | VBINeiSic1915_1673   | Radical SAM family protein HutW 2C similar to coproporphyrinogen III oxidase 2C oxygen-independent 2C associated wit |
| Neisseria sicca | VBINeiSic1915_1428   | RNA polymerase sigma factor RpoD                                                                                     |
| Neisseria sicca | VBINeiSic181086_1483 | RNA polymerase sigma factor RpoH                                                                                     |
| Neisseria sicca | VBINeiSic181086_1093 | S-ribosylhomocysteine lyase EC 4.4.1.21 Autoinducer-2 production protein LuxS                                        |
| Neisseria sicca | VBINeiSic1915_1898   | S-ribosylhomocysteine lyase EC 4.4.1.21 Autoinducer-2 production protein LuxS                                        |
| Neisseria sicca | VBINeiSic181086_1605 | Serine protease precursor MucD AlgY associated with sigma factor RpoE                                                |
| Neisseria sicca | VBINeiSic1915_1619   | sigma-54 dependent response regulator                                                                                |
| Neisseria sicca | VBINeiSic1915_1626   | sigma-54 dependent response regulator                                                                                |
| Neisseria sicca | VBINeiSic1915_0219   | Superoxide dismutase Fe EC 1.15.1.1                                                                                  |
| Neisseria sicca | VBINeiSic1915_0756   | Surface protein A                                                                                                    |
| Neisseria sicca | VBINeiSic1915_1329   | Tetraacyldisaccharide 4'-kinase EC 2.7.1.130                                                                         |
| Neisseria sicca | VBINeiSic1915_2200   | Tetraacyldisaccharide 4'-kinase EC 2.7.1.130                                                                         |
| Neisseria sicca | VBINeiSic1915_0208   | TETRATRICOPEPTIDE REPEAT FAMILY PROTEIN                                                                              |
| Neisseria sicca | VBINeiSic1915_0149   | TETRATRICOPEPTIDE REPEAT FAMILY PROTEIN                                                                              |
| Neisseria sicca | VBINeiSic1915_0052   | TonB-dependent siderophore receptor                                                                                  |
| Neisseria sicca | VBINeiSic1915_2133   | TonB-dependent siderophore receptor                                                                                  |
| Neisseria sicca | VBINeiSic1915_0326   | Translation elongation factor Tu                                                                                     |
| Neisseria sicca | VBINeiSic1915_0331   | Translation elongation factor Tu                                                                                     |
| Neisseria sicca | VBINeiSic181086_2471 | Translation elongation factor Tu                                                                                     |

Table S8

|                              |                      |                                                                                                                       |
|------------------------------|----------------------|-----------------------------------------------------------------------------------------------------------------------|
| Neisseria sicca              | VBINeiSic1915_0252   | Translation elongation factor Tu                                                                                      |
| Neisseria sicca              | VBINeiSic1915_1089   | Twitching motility protein PilT                                                                                       |
| Neisseria sicca              | VBINeiSic181086_0172 | Twitching motility protein PilT                                                                                       |
| Neisseria sicca              | VBINeiSic1915_1074   | Twitching motility protein PilT                                                                                       |
| Neisseria sicca              | VBINeiSic181086_0084 | Twitching motility protein PilT                                                                                       |
| Neisseria sicca              | VBINeiSic181086_1887 | Two component system histidine kinase EC 2.7.3.-                                                                      |
| Neisseria sicca              | VBINeiSic1915_2734   | Type IV fimbrial assembly protein PilC                                                                                |
| Neisseria sicca              | VBINeiSic1915_2636   | Type IV pilus biogenesis protein PilE                                                                                 |
| Neisseria sicca              | VBINeiSic1915_0383   | Type IV pilus biogenesis protein PilE                                                                                 |
| Neisseria sicca              | VBINeiSic1915_1460   | Type IV pilus biogenesis protein PilE                                                                                 |
| Neisseria sicca              | VBINeiSic1915_1288   | Type IV pilus biogenesis protein PilF                                                                                 |
| Neisseria sicca              | VBINeiSic181086_2368 | Type IV pilus biogenesis protein PilO                                                                                 |
| Neisseria sicca              | VBINeiSic181086_2334 | Type IV pilus biogenesis protein PilP                                                                                 |
| Neisseria sicca              | VBINeiSic181086_2286 | Type IV pilus biogenesis protein PilQ                                                                                 |
| Neisseria sicca              | VBINeiSic1915_1094   | UDP-3-O-3-hydroxymyristoyl glucosamine N-acyltransferase EC 2.3.1.-                                                   |
| Neisseria sicca              | VBINeiSic181086_0271 | UDP-3-O-3-hydroxymyristoyl N-acetylglucosamine deacetylase EC 3.5.1.-                                                 |
| Neisseria sicca              | VBINeiSic1915_1561   | UDP-3-O-3-hydroxymyristoyl N-acetylglucosamine deacetylase EC 3.5.1.-                                                 |
| Neisseria sicca              | VBINeiSic1915_2061   | UDP-3-O-3-hydroxymyristoyl N-acetylglucosamine deacetylase EC 3.5.1.-                                                 |
| Neisseria sicca              | VBINeiSic1915_2044   | UDP-galactose-lipid carrier transferase EC 2.-.-.-                                                                    |
| Neisseria sicca              | VBINeiSic1915_1715   | UDP-galactose-lipid carrier transferase EC 2.-.-.-                                                                    |
| Neisseria sicca              | VBINeiSic1915_0633   | Uncharacterized ABC transporter 2C ATP-binding protein YrbF                                                           |
| Neisseria sicca              | VBINeiSic1915_0301   | Uncharacterized protein ImpC                                                                                          |
| Neisseria sicca              | VBINeiSic1915_0323   | Uncharacterized protein ImpD                                                                                          |
| Neisseria sicca              | VBINeiSic181086_0369 | Undecaprenyl pyrophosphate synthetase EC 2.5.1.31                                                                     |
| Neisseria sicca              | VBINeiSic1915_1748   | Zinc ABC transporter 2C ATP-binding protein ZnuC                                                                      |
| Neisseria sicca              | VBINeiSic1915_2366   | Zinc ABC transporter 2C periplasmic-binding protein ZnuA                                                              |
| Neisseria sp. oral taxon 014 | VBINeiSp28275_1062   | 3-deoxy-D-manno-octulosonic-acid transferase EC 2.-.-.-                                                               |
| Neisseria sp. oral taxon 014 | VBINeiSp28275_2073   | 3-oxoacyl-ACP synthase EC 2.3.1.41 FabV like                                                                          |
| Neisseria sp. oral taxon 014 | VBINeiSp28275_2354   | 3-oxoacyl-acyl-carrier-protein synthase 2C KASII EC 2.3.1.41                                                          |
| Neisseria sp. oral taxon 014 | VBINeiSp28275_1065   | Acyl-acyl-carrier-protein--UDP-N- acetylglucosamine O-acyltransferase EC 2.3.1.129                                    |
| Neisseria sp. oral taxon 014 | VBINeiSp28275_2222   | adherence and invasion outer membrane protein binds collagen 2Cfibronectin and laminins 2Cprovides protection against |
| Neisseria sp. oral taxon 014 | VBINeiSp28275_0172   | ADP-heptose--lipooligosaccharide heptosyltransferase II EC 2.4.1.-                                                    |
| Neisseria sp. oral taxon 014 | VBINeiSp28275_0437   | Alkaline phosphatase EC 3.1.3.1                                                                                       |
| Neisseria sp. oral taxon 014 | VBINeiSp28275_0553   | Alkaline phosphatase EC 3.1.3.1                                                                                       |
| Neisseria sp. oral taxon 014 | VBINeiSp28275_0432   | Alkaline phosphatase EC 3.1.3.1                                                                                       |
| Neisseria sp. oral taxon 014 | VBINeiSp28275_1365   | Anthranilate synthase 2C aminase component EC 4.1.3.27                                                                |
| Neisseria sp. oral taxon 014 | VBINeiSp28275_1710   | Biopolymer transport protein ExbD TolR                                                                                |
| Neisseria sp. oral taxon 014 | VBINeiSp28275_0951   | Cell division transporter 2C ATP-binding protein FtsE TC 3.A.5.1.1                                                    |
| Neisseria sp. oral taxon 014 | VBINeiSp28275_2063   | ClpB protein                                                                                                          |
| Neisseria sp. oral taxon 014 | VBINeiSp28275_0323   | COG1272 Predicted membrane protein hemolysin III homolog                                                              |
| Neisseria sp. oral taxon 014 | VBINeiSp28275_0185   | Dipeptide transport ATP-binding protein DppD TC 3.A.1.5.2                                                             |
| Neisseria sp. oral taxon 014 | VBINeiSp28275_0183   | Dipeptide transport ATP-binding protein DppD TC 3.A.1.5.2                                                             |
| Neisseria sp. oral taxon 014 | VBINeiSp28275_2378   | dTDP-4-dehydrorhamnose 3 2C5-epimerase EC 5.1.3.13                                                                    |
| Neisseria sp. oral taxon 014 | VBINeiSp28275_2504   | dTDP-glucose 4 2C6-dehydratase EC 4.2.1.46                                                                            |
| Neisseria sp. oral taxon 014 | VBINeiSp28275_0592   | Ferric anguibactin transport system permease protein fatD                                                             |
| Neisseria sp. oral taxon 014 | VBINeiSp28275_2365   | Ferrichrome transport ATP-binding protein FhuC TC 3.A.1.14.3                                                          |
| Neisseria sp. oral taxon 014 | VBINeiSp28275_2060   | Ferrichrome-iron receptor                                                                                             |
| Neisseria sp. oral taxon 014 | VBINeiSp28275_2594   | FIG00497364 hypothetical protein                                                                                      |
| Neisseria sp. oral taxon 014 | VBINeiSp28275_2509   | FIG00497364 hypothetical protein                                                                                      |
| Neisseria sp. oral taxon 014 | VBINeiSp28275_2508   | FIG00497364 hypothetical protein                                                                                      |
| Neisseria sp. oral taxon 014 | VBINeiSp28275_2506   | FIG00497364 hypothetical protein                                                                                      |
| Neisseria sp. oral taxon 014 | VBINeiSp28275_1352   | FIG00848649 hypothetical protein                                                                                      |
| Neisseria sp. oral taxon 014 | VBINeiSp28275_0068   | FIG138576 3-oxoacyl-ACP synthase EC 2.3.1.41                                                                          |
| Neisseria sp. oral taxon 014 | VBINeiSp28275_1424   | fimbrial biogenesis and twitching motility protein 2C probable NMB1309                                                |
| Neisseria sp. oral taxon 014 | VBINeiSp28275_2462   | Glucose-1-phosphate thymidyltransferase EC 2.7.7.24                                                                   |
| Neisseria sp. oral taxon 014 | VBINeiSp28275_0233   | Glucose-6-phosphate isomerase EC 5.3.1.9                                                                              |
| Neisseria sp. oral taxon 014 | VBINeiSp28275_2342   | GTP pyrophosphokinase EC 2.7.6.5 2C pppGpp synthetase II Guanosine-3' 2C5'-bisdiphosphate 3'-pyrophosphohydrolyta     |
| Neisseria sp. oral taxon 014 | VBINeiSp28275_0673   | Iron compound ABC uptake transporter permease protein PiuC                                                            |
| Neisseria sp. oral taxon 014 | VBINeiSp28275_0174   | L-proline glycine betaine ABC transport system permease protein ProV TC 3.A.1.12.1                                    |
| Neisseria sp. oral taxon 014 | VBINeiSp28275_0175   | Long-chain-fatty-acid--CoA ligase EC 6.2.1.3                                                                          |
| Neisseria sp. oral taxon 014 | VBINeiSp28275_1804   | Low molecular weight protein-tyrosine-phosphatase Wzb EC 3.1.3.48                                                     |
| Neisseria sp. oral taxon 014 | VBINeiSp28275_2034   | Macrophage infectivity potentiator GldI                                                                               |
| Neisseria sp. oral taxon 014 | VBINeiSp28275_0145   | Magnesium and cobalt efflux protein CorC                                                                              |
| Neisseria sp. oral taxon 014 | VBINeiSp28275_2064   | Methionine ABC transporter ATP-binding protein                                                                        |
| Neisseria sp. oral taxon 014 | VBINeiSp28275_1559   | MotA TolQ ExbB proton channel family protein                                                                          |
| Neisseria sp. oral taxon 014 | VBINeiSp28275_1182   | Nitrous oxide reductase maturation protein NosF ATPase                                                                |
| Neisseria sp. oral taxon 014 | VBINeiSp28275_1058   | Oligopeptide ABC transporter 2C periplasmic oligopeptide-binding protein OppA TC 3.A.1.5.1                            |
| Neisseria sp. oral taxon 014 | VBINeiSp28275_2353   | Ornithine carbamoyltransferase EC 2.1.3.3                                                                             |
| Neisseria sp. oral taxon 014 | VBINeiSp28275_1486   | Outer membrane protein class 1                                                                                        |
| Neisseria sp. oral taxon 014 | VBINeiSp28275_2220   | Oxidoreductase EC 1.1.1.-                                                                                             |
| Neisseria sp. oral taxon 014 | VBINeiSp28275_2198   | Phosphoglucomutase EC 5.4.2.2                                                                                         |
| Neisseria sp. oral taxon 014 | VBINeiSp28275_2224   | Phosphoheptose isomerase EC 5.3.1.-                                                                                   |
| Neisseria sp. oral taxon 014 | VBINeiSp28275_2377   | Phosphoribosylaminoimidazole-succinocarboxamide synthase EC 6.3.2.6                                                   |
| Neisseria sp. oral taxon 014 | VBINeiSp28275_0119   | Porphobilinogen deaminase EC 2.5.1.61                                                                                 |
| Neisseria sp. oral taxon 014 | VBINeiSp28275_0786   | Probable polybeta-D-mannuronate O-acetylase EC 2.3.1.-                                                                |
| Neisseria sp. oral taxon 014 | VBINeiSp28275_0706   | Protein ImpG Vasa                                                                                                     |
| Neisseria sp. oral taxon 014 | VBINeiSp28275_0860   | RNA polymerase sigma factor RpoE                                                                                      |
| Neisseria sp. oral taxon 014 | VBINeiSp28275_2062   | Sel1 domain protein repeat-containing protein                                                                         |
| Neisseria sp. oral taxon 014 | VBINeiSp28275_2061   | Sel1 domain protein repeat-containing protein                                                                         |

Table S8

|                              |                     |                                                                                               |
|------------------------------|---------------------|-----------------------------------------------------------------------------------------------|
| Neisseria sp. oral taxon 014 | VBINeiSp28275_1040  | sigma-54 dependent response regulator                                                         |
| Neisseria sp. oral taxon 014 | VBINeiSp28275_1003  | sigma-54 dependent response regulator                                                         |
| Neisseria sp. oral taxon 014 | VBINeiSp28275_1391  | Sulfate and thiosulfate import ATP-binding protein CysA EC 3.6.3.25                           |
| Neisseria sp. oral taxon 014 | VBINeiSp28275_2186  | Superoxide dismutase Fe EC 1.15.1.1                                                           |
| Neisseria sp. oral taxon 014 | VBINeiSp28275_2315  | TETRATRICOPEPTIDE REPEAT FAMILY PROTEIN                                                       |
| Neisseria sp. oral taxon 014 | VBINeiSp28275_2221  | Transcriptional regulatory protein RtcR                                                       |
| Neisseria sp. oral taxon 014 | VBINeiSp28275_2251  | Translation elongation factor Tu                                                              |
| Neisseria sp. oral taxon 014 | VBINeiSp28275_1153  | Twitching motility protein PilT                                                               |
| Neisseria sp. oral taxon 014 | VBINeiSp28275_2018  | Twitching motility protein PilT                                                               |
| Neisseria sp. oral taxon 014 | VBINeiSp28275_2032  | Twitching motility protein PilT                                                               |
| Neisseria sp. oral taxon 014 | VBINeiSp28275_1876  | Type IV pilus biogenesis protein PilM                                                         |
| Neisseria sp. oral taxon 014 | VBINeiSp28275_1879  | Type IV pilus biogenesis protein PilN                                                         |
| Neisseria sp. oral taxon 014 | VBINeiSp28275_1900  | Type IV pilus biogenesis protein PilO                                                         |
| Neisseria sp. oral taxon 014 | VBINeiSp28275_1908  | Type IV pilus biogenesis protein PilP                                                         |
| Neisseria sp. oral taxon 014 | VBINeiSp28275_1927  | Type IV pilus biogenesis protein PilQ                                                         |
| Neisseria sp. oral taxon 014 | VBINeiSp28275_1768  | Tyrosine-protein kinase Wzc EC 2.7.10.2                                                       |
| Neisseria sp. oral taxon 014 | VBINeiSp28275_1138  | UDP-3-O-3-hydroxymyristoyl glucosamine N-acyltransferase EC 2.3.1.-                           |
| Neisseria sp. oral taxon 014 | VBINeiSp28275_1855  | UDP-glucose dehydrogenase EC 1.1.1.22                                                         |
| Neisseria sp. oral taxon 014 | VBINeiSp28275_2309  | Uncharacterized ABC transporter 2C ATP-binding protein YrbF                                   |
| Neisseria sp. oral taxon 014 | VBINeiSp28275_2141  | Uncharacterized protein ImpC                                                                  |
| Neisseria sp. oral taxon 014 | VBINeiSp28275_0752  | Uncharacterized protein ImpH VasB                                                             |
| Neisseria sp. oral taxon 014 | VBINeiSp28275_2087  | Uncharacterized protein ImpJ VasE                                                             |
| Neisseria sp. oral taxon 014 | VBINeiSp28275_1142  | Undecaprenyl pyrophosphate synthetase EC 2.5.1.31                                             |
| Neisseria sp. oral taxon 014 | VBINeiSp28275_2208  | UTP-glucose-1-phosphate uridylyltransferase EC 2.7.7.9                                        |
| Neisseria sp. oral taxon 014 | VBINeiSp28275_1044  | VgrG protein                                                                                  |
| Neisseria subflava           | VBINeiSub99872_1789 | 1-acyl-sn-glycerol-3-phosphate acyltransferase EC 2.3.1.51                                    |
| Neisseria subflava           | VBINeiSub99872_1005 | 2-Keto-3-deoxy-D-manno-octulosonate-8-phosphate synthase EC 2.5.1.55                          |
| Neisseria subflava           | VBINeiSub99872_0920 | 3-deoxy-manno-octulosonate cytidyltransferase EC 2.7.7.38                                     |
| Neisseria subflava           | VBINeiSub99872_0036 | 3-isopropylmalate dehydratase small subunit EC 4.2.1.33                                       |
| Neisseria subflava           | VBINeiSub99872_2150 | 4-keto-6-deoxy-N-Acetyl-D-hexosaminyL-Lipid carrier aminotransferase                          |
| Neisseria subflava           | VBINeiSub99872_1081 | ABC transporter 2C transmembrane regionABC transporterPeptidase C39 2C bacteriocin processing |
| Neisseria subflava           | VBINeiSub99872_1794 | ABC-transport system ATP-binding protein                                                      |
| Neisseria subflava           | VBINeiSub99872_0999 | Acetylornithine aminotransferase EC 2.6.1.11                                                  |
| Neisseria subflava           | VBINeiSub99872_0908 | ADP-heptose synthase EC 2.7.-.- D-glycero-beta-D-manno-heptose 7-phosphate kinase             |
| Neisseria subflava           | VBINeiSub99872_0664 | ADP-heptose-lipooligosaccharide heptosyltransferase II EC 2.4.1.-                             |
| Neisseria subflava           | VBINeiSub99872_1952 | Alcohol dehydrogenase EC 1.1.1.1 3B Acetaldehyde dehydrogenase EC 1.2.1.10                    |
| Neisseria subflava           | VBINeiSub99872_0861 | Anthranilate phosphoribosyltransferase EC 2.4.2.18                                            |
| Neisseria subflava           | VBINeiSub99872_0328 | Anthranilate synthase 2C aminase component EC 4.1.3.27                                        |
| Neisseria subflava           | VBINeiSub99872_0772 | Aspartate racemase EC 5.1.1.13                                                                |
| Neisseria subflava           | VBINeiSub99872_1831 | ATP synthase beta chain EC 3.6.3.14                                                           |
| Neisseria subflava           | VBINeiSub99872_0844 | ATP-dependent Clp protease ATP-binding subunit ClpA                                           |
| Neisseria subflava           | VBINeiSub99872_0830 | ATP-dependent Clp protease ATP-binding subunit ClpA                                           |
| Neisseria subflava           | VBINeiSub99872_1990 | Cell division transporter 2C ATP-binding protein FtsE TC 3.A.5.1.1                            |
| Neisseria subflava           | VBINeiSub99872_0855 | ClpB protein                                                                                  |
| Neisseria subflava           | VBINeiSub99872_0294 | Coproporphyrinogen III oxidase 2C oxygen-independent EC 1.3.99.22                             |
| Neisseria subflava           | VBINeiSub99872_0324 | Enolase EC 4.2.1.11                                                                           |
| Neisseria subflava           | VBINeiSub99872_0106 | Ferrochelatase 2C protoheme ferro-lyase EC 4.99.1.1                                           |
| Neisseria subflava           | VBINeiSub99872_1134 | Ferrous iron transport protein B                                                              |
| Neisseria subflava           | VBINeiSub99872_0213 | FIG00847125 hypothetical protein                                                              |
| Neisseria subflava           | VBINeiSub99872_1336 | FIG00848649 hypothetical protein                                                              |
| Neisseria subflava           | VBINeiSub99872_0699 | FIG138576 3-oxoacyl-ACP synthase EC 2.3.1.41                                                  |
| Neisseria subflava           | VBINeiSub99872_0794 | fimbrial biogenesis and twitching motility protein 2C probable NMB1309                        |
| Neisseria subflava           | VBINeiSub99872_0035 | Glutamate transport ATP-binding protein                                                       |
| Neisseria subflava           | VBINeiSub99872_1797 | Glutamine synthetase type I EC 6.3.1.2                                                        |
| Neisseria subflava           | VBINeiSub99872_1369 | GTP pyrophosphokinase EC 2.7.6.5 2C pppGpp synthetase I                                       |
| Neisseria subflava           | VBINeiSub99872_0233 | IcmF-related protein                                                                          |
| Neisseria subflava           | VBINeiSub99872_0376 | IcmF-related protein                                                                          |
| Neisseria subflava           | VBINeiSub99872_0068 | Imidazole glycerol phosphate synthase amidotransferase subunit EC 2.4.2.-                     |
| Neisseria subflava           | VBINeiSub99872_1992 | Iron (III) dicitrate transport system permease protein FecD TC 3.A.1.14.1                     |
| Neisseria subflava           | VBINeiSub99872_1743 | Lipid A export ATP-binding permease protein MsbA EC 3.6.3.25                                  |
| Neisseria subflava           | VBINeiSub99872_0323 | Lipid-A-disaccharide synthase EC 2.4.1.182                                                    |
| Neisseria subflava           | VBINeiSub99872_1985 | Lipopolysaccharide heptosyltransferase I EC 2.4.1.-                                           |
| Neisseria subflava           | VBINeiSub99872_0291 | Lipopolysaccharide heptosyltransferase III EC 2.4.1.-                                         |
| Neisseria subflava           | VBINeiSub99872_0567 | Methionine ABC transporter ATP-binding protein                                                |
| Neisseria subflava           | VBINeiSub99872_1824 | NADH-ubiquinone oxidoreductase chain G EC 1.6.5.3                                             |
| Neisseria subflava           | VBINeiSub99872_0407 | Ornithine carbamoyltransferase EC 2.1.3.3                                                     |
| Neisseria subflava           | VBINeiSub99872_0668 | Outer membrane hemoglobin utilization protein HmbR                                            |
| Neisseria subflava           | VBINeiSub99872_0223 | Outer membrane protein ImpK VasF 2C OmpA MotB domain                                          |
| Neisseria subflava           | VBINeiSub99872_0902 | Outer membrane receptor for ferric coprogen and ferric-rhodotorulic acid                      |
| Neisseria subflava           | VBINeiSub99872_0903 | Outer membrane receptor proteins 2C mostly Fe transport                                       |
| Neisseria subflava           | VBINeiSub99872_2145 | Oxidoreductase EC 1.1.1.-                                                                     |
| Neisseria subflava           | VBINeiSub99872_2035 | Porphobilinogen deaminase EC 2.5.1.61                                                         |
| Neisseria subflava           | VBINeiSub99872_0215 | Protein ImpG VasA                                                                             |
| Neisseria subflava           | VBINeiSub99872_0893 | Putrescine transport ATP-binding protein PotG TC 3.A.1.11.2                                   |
| Neisseria subflava           | VBINeiSub99872_0620 | RNA polymerase sigma factor RpoD                                                              |
| Neisseria subflava           | VBINeiSub99872_0882 | RNA polymerase sigma factor RpoE                                                              |
| Neisseria subflava           | VBINeiSub99872_1543 | RNA polymerase sigma factor RpoH                                                              |
| Neisseria subflava           | VBINeiSub99872_0082 | RNA polymerase sigma factor RpoH                                                              |
| Neisseria subflava           | VBINeiSub99872_2031 | Serine protease precursor MucD AlgY associated with sigma factor RpoE                         |

|                                  |                      |                                                                                            |
|----------------------------------|----------------------|--------------------------------------------------------------------------------------------|
| Neisseria subflava               | VBINeiSub99872_0326  | Sulfate and thiosulfate import ATP-binding protein CysA EC 3.6.3.25                        |
| Neisseria subflava               | VBINeiSub99872_0968  | Tetraacyldisaccharide 4'-kinase EC 2.7.1.130                                               |
| Neisseria subflava               | VBINeiSub99872_0312  | Translation elongation factor Tu                                                           |
| Neisseria subflava               | VBINeiSub99872_2112  | Type IV pilus biogenesis protein PilM                                                      |
| Neisseria subflava               | VBINeiSub99872_2126  | Type IV pilus biogenesis protein PilN                                                      |
| Neisseria subflava               | VBINeiSub99872_2134  | Type IV pilus biogenesis protein PilO                                                      |
| Neisseria subflava               | VBINeiSub99872_2141  | Type IV pilus biogenesis protein PilP                                                      |
| Neisseria subflava               | VBINeiSub99872_2144  | Type IV pilus biogenesis protein PilQ                                                      |
| Neisseria subflava               | VBINeiSub99872_2024  | Type IV secretion system protein VirD4                                                     |
| Neisseria subflava               | VBINeiSub99872_0329  | Uncharacterized protein ImpA                                                               |
| Neisseria subflava               | VBINeiSub99872_0139  | Uncharacterized protein ImpB                                                               |
| Neisseria subflava               | VBINeiSub99872_0144  | Uncharacterized protein ImpC                                                               |
| Neisseria subflava               | VBINeiSub99872_0346  | Uncharacterized protein ImpC                                                               |
| Neisseria subflava               | VBINeiSub99872_0358  | Uncharacterized protein ImpD                                                               |
| Neisseria subflava               | VBINeiSub99872_0404  | Uncharacterized protein ImpJ VasE                                                          |
| Neisseria subflava               | VBINeiSub99872_0262  | VgrG protein                                                                               |
| Neisseria subflava               | VBINeiSub99872_2230  | Zinc ABC transporter 2C periplasmic-binding protein ZnuA                                   |
| Neisseria weaveri                | VBINeiWea214817_0236 | 3-oxoacyl-ACP synthase EC 2.3.1.41 FabV like                                               |
| Neisseria weaveri                | VBINeiWea214817_1931 | Capsular polysaccharide biosynthesis export periplasmic protein WcbC                       |
| Neisseria weaveri                | VBINeiWea214817_2027 | Capsular polysaccharide export system inner membrane protein KpsE                          |
| Neisseria weaveri                | VBINeiWea214817_1486 | Heat shock protein 60 family chaperone GroEL                                               |
| Neisseria weaveri                | VBINeiWea214817_1618 | Iron (III) dicitrate transport ATP-binding protein FecE TC 3.A.1.14.1                      |
| Neisseria weaveri                | VBINeiWea214817_1546 | Iron compound ABC uptake transporter substrate-binding protein PiuA                        |
| Neisseria weaveri                | VBINeiWea214817_0650 | Leader peptidase Prepilin peptidase EC 3.4.23.43 N-methyltransferase EC 2.1.1.-            |
| Neisseria weaveri                | VBINeiWea214817_1820 | MotA TolQ ExbB proton channel family protein                                               |
| Neisseria weaveri                | VBINeiWea214817_1545 | Outer membrane protein class 1                                                             |
| Neisseria weaveri                | VBINeiWea214817_0349 | Outer membrane receptor proteins 2C mostly Fe transport                                    |
| Neisseria weaveri                | VBINeiWea214817_0394 | Respiratory nitrate reductase beta chain EC 1.7.99.4                                       |
| Neisseria weaveri                | VBINeiWea214817_1225 | Type IV fimbrial assembly 2C ATPase PilB                                                   |
| Neisseria weaveri                | VBINeiWea214817_0796 | Type IV fimbrial assembly protein PilC                                                     |
| Ochrobactrum anthropi            | VBIOchAnt73124_0296  | dTDP-glucose 4 2C6-dehydratase EC 4.2.1.46                                                 |
| Ochrobactrum anthropi            | VBIOchAnt73124_3635  | Type IV fimbrial biogenesis protein PilY1                                                  |
| Ochrobactrum anthropi            | VBIOchAnt73124_2818  | Type IV fimbrial biogenesis protein PilY1                                                  |
| Olsenella sp. oral taxon 809     | VBIOIsSp138764_0105  | 3-oxoacyl-acyl-carrier-protein synthase 2C KASII EC 2.3.1.41                               |
| Olsenella sp. oral taxon 809     | VBIOIsSp138764_0146  | Acyl-acyl-carrier-protein--UDP-N- acetylglucosamine O-acyltransferase EC 2.3.1.129         |
| Olsenella sp. oral taxon 809     | VBIOIsSp138764_1213  | Biopolymer transport protein ExbD TolR                                                     |
| Olsenella sp. oral taxon 809     | VBIOIsSp138764_1585  | Glucose-6-phosphate isomerase EC 5.3.1.9                                                   |
| Olsenella sp. oral taxon 809     | VBIOIsSp138764_1705  | hypothetical protein                                                                       |
| Olsenella sp. oral taxon 809     | VBIOIsSp138764_1743  | hypothetical protein                                                                       |
| Olsenella sp. oral taxon 809     | VBIOIsSp138764_0780  | Membrane-associated zinc metalloprotease                                                   |
| Olsenella sp. oral taxon 809     | VBIOIsSp138764_1419  | MotA TolQ ExbB proton channel family protein                                               |
| Olsenella sp. oral taxon 809     | VBIOIsSp138764_0538  | Outer membrane protein assembly factor YaeT precursor                                      |
| Olsenella sp. oral taxon 809     | VBIOIsSp138764_1105  | Translation elongation factor Tu                                                           |
| Olsenella sp. oral taxon 809     | VBIOIsSp138764_1614  | Type IV fimbrial biogenesis protein PilY1                                                  |
| Olsenella uli                    | VBIOIsUli28891_1272  | 3-oxoacyl-acyl-carrier-protein synthase 2C KASII EC 2.3.1.41                               |
| Olsenella uli                    | VBIOIsUli28891_0147  | Alcohol dehydrogenase EC 1.1.1.1 3B Acetaldehyde dehydrogenase EC 1.2.1.10                 |
| Olsenella uli                    | VBIOIsUli28891_1140  | ATP synthase alpha chain EC 3.6.3.14                                                       |
| Olsenella uli                    | VBIOIsUli28891_0660  | ATP synthase beta chain EC 3.6.3.14                                                        |
| Olsenella uli                    | VBIOIsUli28891_0356  | Diaminopimelate decarboxylase EC 4.1.1.20                                                  |
| Olsenella uli                    | VBIOIsUli28891_1371  | dTDP-glucose 4 2C6-dehydratase EC 4.2.1.46                                                 |
| Olsenella uli                    | VBIOIsUli28891_0082  | hypothetical protein                                                                       |
| Olsenella uli                    | VBIOIsUli28891_1780  | Iron (III) dicitrate transport ATP-binding protein FecE TC 3.A.1.14.1                      |
| Olsenella uli                    | VBIOIsUli28891_1165  | Polyphosphate kinase 2 EC 2.7.4.1                                                          |
| Olsenella uli                    | VBIOIsUli28891_1357  | Uncharacterized ABC transporter 2C ATP-binding protein YrbF                                |
| Oribacterium sinus               | VBIOriSin4127_1841   | Lipid-A-disaccharide synthase EC 2.4.1.182                                                 |
| Oribacterium sp. oral taxon 108  | VBIOriSp172601_1333  | Acyl-acyl-carrier-protein--UDP-N- acetylglucosamine O-acyltransferase EC 2.3.1.129         |
| Oribacterium sp. oral taxon 108  | VBIOriSp172601_1729  | UDP-3-O-3-hydroxymyristoyl glucosamine N-acyltransferase EC 2.3.1.-                        |
| Paenibacillus sp. oral taxon 786 | VBIPaeSp50414_2761   | ABC transporter 2C ATP-binding protein                                                     |
| Paenibacillus sp. oral taxon 786 | VBIPaeSp50414_0410   | Membrane-associated zinc metalloprotease                                                   |
| Paenibacillus sp. oral taxon 786 | VBIPaeSp50414_2689   | NADH-ubiquinone oxidoreductase chain G EC 1.6.5.3                                          |
| Paenibacillus sp. oral taxon 786 | VBIPaeSp50414_0162   | Outer membrane protein assembly factor YaeT precursor                                      |
| Parascardovia denticolens        | VBIParDen168656_0171 | Copper-sensing two-component system response regulator CpxR                                |
| Parascardovia denticolens        | VBIParDen168656_0904 | Ferrous iron transport protein B                                                           |
| Parascardovia denticolens        | VBIParDen120515_0719 | FIG00848403 hypothetical protein                                                           |
| Parascardovia denticolens        | VBIParDen168656_1345 | fimbrial biogenesis and twitching motility protein 2C probable NMB1309                     |
| Parascardovia denticolens        | VBIParDen120515_0598 | Glucose-6-phosphate isomerase EC 5.3.1.9                                                   |
| Parascardovia denticolens        | VBIParDen168656_1560 | Glutamate transport ATP-binding protein                                                    |
| Parascardovia denticolens        | VBIParDen120515_1380 | Glutamate-1-semialdehyde aminotransferase EC 5.4.3.8                                       |
| Parascardovia denticolens        | VBIParDen168656_0631 | Glutamyl-tRNA reductase EC 1.2.1.70                                                        |
| Parascardovia denticolens        | VBIParDen168656_0198 | Imidazole glycerol phosphate synthase amidotransferase subunit EC 2.4.2.-                  |
| Parascardovia denticolens        | VBIParDen120515_0696 | Long-chain-fatty-acid--CoA ligase EC 6.2.1.3                                               |
| Parascardovia denticolens        | VBIParDen168656_0729 | Macrolide export ATP-binding permease protein MacB EC 3.6.3.-                              |
| Parascardovia denticolens        | VBIParDen120515_0665 | Macrophage infectivity potentiator GldI                                                    |
| Parascardovia denticolens        | VBIParDen168656_0440 | Methionine ABC transporter ATP-binding protein                                             |
| Parascardovia denticolens        | VBIParDen120515_0092 | NAD-dependent glyceraldehyde-3-phosphate dehydrogenase EC 1.2.1.12                         |
| Parascardovia denticolens        | VBIParDen120515_1176 | Oligopeptide ABC transporter 2C periplasmic oligopeptide-binding protein OppA TC 3.A.1.5.1 |
| Parascardovia denticolens        | VBIParDen168656_0145 | Outer membrane protein A precursor                                                         |
| Parascardovia denticolens        | VBIParDen168656_0254 | Outer membrane protein class 1                                                             |
| Parascardovia denticolens        | VBIParDen168656_1121 | Phosphoribosylaminoimidazole-succinocarboxamide synthase EC 6.3.2.6                        |

Table S8

|                                  |                      |                                                                                                                       |
|----------------------------------|----------------------|-----------------------------------------------------------------------------------------------------------------------|
| Parascardovia denticolens        | VBIParDen168656_1547 | Probable polybeta-D-mannuronate O-acetylase EC 2.3.1.-                                                                |
| Parascardovia denticolens        | VBIParDen168656_0137 | Protein export cytoplasm protein SecA ATPase RNA helicase TC 3.A.5.1.1                                                |
| Parascardovia denticolens        | VBIParDen120515_0045 | Putative periplasmic substrate-binding transport protein                                                              |
| Parascardovia denticolens        | VBIParDen168656_0539 | Serine protease precursor MucD AlgY associated with sigma factor RpoE                                                 |
| Parascardovia denticolens        | VBIParDen168656_1465 | Superoxide dismutase Fe EC 1.15.1.1                                                                                   |
| Parascardovia denticolens        | VBIParDen120515_1410 | Type IV pilus biogenesis protein PilE                                                                                 |
| Parvimonas sp. oral taxon 110    | VBIParSp162507_1066  | Acetylmethionine aminotransferase EC 2.6.1.11                                                                         |
| Parvimonas sp. oral taxon 110    | VBIParSp162507_0760  | Nitrogen regulation protein NtrX                                                                                      |
| Parvimonas sp. oral taxon 393    | VBIParSp177393_0391  | Amino acid ABC transporter 2C ATP-binding protein                                                                     |
| Parvimonas sp. oral taxon 393    | VBIParSp177393_1568  | ATP-dependent Clp protease ATP-binding subunit ClpA                                                                   |
| Parvimonas sp. oral taxon 393    | VBIParSp177393_0415  | Cell division trigger factor EC 5.2.1.8                                                                               |
| Parvimonas sp. oral taxon 393    | VBIParSp177393_0743  | ClpB protein                                                                                                          |
| Parvimonas sp. oral taxon 393    | VBIParSp177393_1559  | Enolase EC 4.2.1.11                                                                                                   |
| Parvimonas sp. oral taxon 393    | VBIParSp177393_0936  | Phosphoglucosamine mutase EC 5.4.2.10                                                                                 |
| Parvimonas sp. oral taxon 393    | VBIParSp177393_0257  | Radical SAM family protein HutW 2C similar to coproporphyrinogen III oxidase 2C oxygen-independent 2C associated with |
| Parvimonas sp. oral taxon 393    | VBIParSp177393_0921  | Zinc ABC transporter 2C periplasmic-binding protein ZnuA                                                              |
| Peptoniphilus indolicus          | VBIPepInd184400_0579 | ATP-dependent Clp protease ATP-binding subunit ClpA                                                                   |
| Peptoniphilus lacrimalis         | VBIPepLac107565_0430 | ADP-L-glycero-D-manno-heptose-6-epimerase EC 5.1.3.20                                                                 |
| Peptoniphilus sp. oral taxon 375 | VBIPepSp173817_0218  | ADP-heptose synthase EC 2.7.-.- D-glycero-beta-D-manno-heptose 7-phosphate kinase                                     |
| Peptoniphilus sp. oral taxon 375 | VBIPepSp173817_0335  | Dipeptide transport ATP-binding protein DppD TC 3.A.1.5.2                                                             |
| Peptoniphilus sp. oral taxon 375 | VBIPepSp173817_0228  | Dipeptide transport ATP-binding protein DppD TC 3.A.1.5.2                                                             |
| Peptoniphilus sp. oral taxon 386 | VBIPepSp24046_0784   | Glycerol-3-phosphate cytidyltransferase EC 2.7.7.39                                                                   |
| Peptoniphilus sp. oral taxon 386 | VBIPepSp24046_0584   | Type IV pilus biogenesis protein PilM                                                                                 |
| Peptoniphilus sp. oral taxon 386 | VBIPepSp24046_0397   | Type IV pilus biogenesis protein PilQ                                                                                 |
| Peptostreptococcus stomatis      | VBIPepSto8168_1734   | dTDP-glucose 4 2C6-dehydratase EC 4.2.1.46                                                                            |
| Peptostreptococcus stomatis      | VBIPepSto8168_0366   | Ferric anguibactin transport system permease protein fatD                                                             |
| Peptostreptococcus stomatis      | VBIPepSto8168_0528   | Heat shock protein 60 family chaperone GroEL                                                                          |
| Peptostreptococcus stomatis      | VBIPepSto8168_0212   | Iron (III) dicitrate transport ATP-binding protein FecE TC 3.A.1.14.1                                                 |
| Peptostreptococcus stomatis      | VBIPepSto8168_0330   | Iron compound ABC uptake transporter permease protein PiuC                                                            |
| Peptostreptococcus stomatis      | VBIPepSto8168_0211   | Lipid A biosynthesis lauroyl acyltransferase EC 2.3.1.-                                                               |
| Peptostreptococcus stomatis      | VBIPepSto8168_1456   | Outer membrane hemoglobin-haptoglobin utilization protein HpuB                                                        |
| Peptostreptococcus stomatis      | VBIPepSto8168_0748   | Protein export cytoplasm protein SecA ATPase RNA helicase TC 3.A.5.1.1                                                |
| Peptostreptococcus stomatis      | VBIPepSto8168_0560   | Translation elongation factor Tu                                                                                      |
| Peptostreptococcus stomatis      | VBIPepSto8168_1729   | Translation elongation factor Tu                                                                                      |
| Peptostreptococcus stomatis      | VBIPepSto8168_0698   | Type IV pilus biogenesis protein PilE                                                                                 |
| Peptostreptococcus stomatis      | VBIPepSto8168_1733   | Zinc ABC transporter 2C periplasmic-binding protein ZnuA                                                              |
| Porphyromonas asaccharolytica    | VBIPorAsa172508_1021 | ABC transporter 2C ATP-binding permease protein                                                                       |
| Porphyromonas asaccharolytica    | VBIPorAsa169717_0330 | ABC transporter 2C transmembrane regionABC transporterPeptidase C39 2C bacteriocin processing                         |
| Porphyromonas asaccharolytica    | VBIPorAsa169717_1171 | ABC TRANSPORTER ATP-BINDING PROTEIN                                                                                   |
| Porphyromonas asaccharolytica    | VBIPorAsa172508_0501 | ATPase component STY3232 of energizing module of queuosine-regulated ECF transporter                                  |
| Porphyromonas asaccharolytica    | VBIPorAsa172508_1004 | Branched-chain amino acid transport ATP-binding protein LivG TC 3.A.1.4.1                                             |
| Porphyromonas asaccharolytica    | VBIPorAsa169717_0987 | Capsular polysaccharide ABC transporter 2C ATP-binding protein KpsT                                                   |
| Porphyromonas asaccharolytica    | VBIPorAsa172508_1174 | Cell division transporter 2C ATP-binding protein FtsE TC 3.A.5.1.1                                                    |
| Porphyromonas asaccharolytica    | VBIPorAsa172508_1053 | ClpB protein                                                                                                          |
| Porphyromonas asaccharolytica    | VBIPorAsa169717_0975 | Enolase EC 4.2.1.11                                                                                                   |
| Porphyromonas asaccharolytica    | VBIPorAsa172508_1233 | Enolase EC 4.2.1.11                                                                                                   |
| Porphyromonas asaccharolytica    | VBIPorAsa169717_1322 | Ferric hydroxamate ABC transporter TC 3.A.1.14.3 2C ATP-binding protein FhuC                                          |
| Porphyromonas asaccharolytica    | VBIPorAsa169717_1456 | Ferrous iron transport protein B                                                                                      |
| Porphyromonas asaccharolytica    | VBIPorAsa169717_1397 | Ferrous iron transport protein B                                                                                      |
| Porphyromonas asaccharolytica    | VBIPorAsa172508_0719 | FIG00534420 hypothetical protein                                                                                      |
| Porphyromonas asaccharolytica    | VBIPorAsa169717_1604 | FIG00555279 hypothetical protein                                                                                      |
| Porphyromonas asaccharolytica    | VBIPorAsa169717_1464 | Glucose-6-phosphate isomerase EC 5.3.1.9                                                                              |
| Porphyromonas asaccharolytica    | VBIPorAsa172508_0280 | Glycosyl transferase 2C family 2                                                                                      |
| Porphyromonas asaccharolytica    | VBIPorAsa169717_0039 | Heat shock protein 60 family chaperone GroEL                                                                          |
| Porphyromonas asaccharolytica    | VBIPorAsa169717_0774 | Outer membrane receptor proteins 2C mostly Fe transport                                                               |
| Porphyromonas asaccharolytica    | VBIPorAsa169717_0414 | Putative HlyD family secretion protein                                                                                |
| Porphyromonas asaccharolytica    | VBIPorAsa172508_1631 | RNA polymerase sigma factor SigB                                                                                      |
| Porphyromonas asaccharolytica    | VBIPorAsa169717_1256 | Sensor histidine kinase                                                                                               |
| Porphyromonas asaccharolytica    | VBIPorAsa172508_0172 | Sortase A 2C LPXTG specific                                                                                           |
| Porphyromonas endodontalis       | VBIPorEnd1195_1373   | ABC transporter 2C ATP-binding permease protein                                                                       |
| Porphyromonas endodontalis       | VBIPorEnd1195_1060   | ABC transporter 2C ATP-binding permease protein                                                                       |
| Porphyromonas endodontalis       | VBIPorEnd1195_1469   | ABC transporter 2C ATP-binding protein                                                                                |
| Porphyromonas endodontalis       | VBIPorEnd1195_1411   | ABC-type multidrug transport system 2C ATPase component                                                               |
| Porphyromonas endodontalis       | VBIPorEnd1195_1120   | ABC-type multidrug transport system 2C ATPase component                                                               |
| Porphyromonas endodontalis       | VBIPorEnd1195_1456   | ATP synthase alpha chain EC 3.6.3.14                                                                                  |
| Porphyromonas endodontalis       | VBIPorEnd1195_1153   | ATP synthase alpha chain EC 3.6.3.14                                                                                  |
| Porphyromonas endodontalis       | VBIPorEnd1195_1361   | ATP-dependent Clp protease ATP-binding subunit ClpA                                                                   |
| Porphyromonas endodontalis       | VBIPorEnd1195_0739   | cation-transporting ATPase PaL                                                                                        |
| Porphyromonas endodontalis       | VBIPorEnd1195_0720   | cation-transporting ATPase PaL                                                                                        |
| Porphyromonas endodontalis       | VBIPorEnd1195_0632   | Chemotaxis regulator - transmits chemoreceptor signals to flagellar motor components CheY                             |
| Porphyromonas endodontalis       | VBIPorEnd1195_0782   | ClpB protein                                                                                                          |
| Porphyromonas endodontalis       | VBIPorEnd1195_1550   | ClpB protein                                                                                                          |
| Porphyromonas endodontalis       | VBIPorEnd1195_0118   | COG1272 Predicted membrane protein hemolysin III homolog                                                              |
| Porphyromonas endodontalis       | VBIPorEnd1195_0645   | Fe-bacillibactin uptake system FeuC                                                                                   |
| Porphyromonas endodontalis       | VBIPorEnd1195_0262   | Ferrous iron transport protein B                                                                                      |
| Porphyromonas endodontalis       | VBIPorEnd1195_0274   | Ferrous iron transport protein B                                                                                      |
| Porphyromonas endodontalis       | VBIPorEnd1195_1410   | FIG00745466 hypothetical protein                                                                                      |
| Porphyromonas endodontalis       | VBIPorEnd1195_0712   | Flagellin protein FlaA                                                                                                |
| Porphyromonas endodontalis       | VBIPorEnd1195_0375   | Heat shock protein 60 family chaperone GroEL                                                                          |

Table S8

|                                   |                           |                                                                                      |
|-----------------------------------|---------------------------|--------------------------------------------------------------------------------------|
| Porphyromonas endodontalis        | VBIPorEnd1195_0236        | HtrA protease chaperone protein                                                      |
| <b>Porphyromonas endodontalis</b> | <b>VBIPorEnd1195_1733</b> | <b>Lipid A export ATP-binding permease protein MsbA</b>                              |
| Porphyromonas endodontalis        | VBIPorEnd1195_0541        | NAD-dependent glyceraldehyde-3-phosphate dehydrogenase EC 1.2.1.12                   |
| Porphyromonas endodontalis        | VBIPorEnd1195_0222        | Oligopeptide transport ATP-binding protein OppD TC 3.A.1.5.1                         |
| Porphyromonas endodontalis        | VBIPorEnd1195_0333        | Osmosensitive K <sup>+</sup> channel histidine kinase KdpD EC 2.7.3.-                |
| Porphyromonas endodontalis        | VBIPorEnd1195_1314        | probable permease protein of ABC transporter system                                  |
| Porphyromonas endodontalis        | VBIPorEnd1195_1329        | putative ABC transporter ATP-binding protein                                         |
| Porphyromonas endodontalis        | VBIPorEnd1195_1727        | Response regulator receiverTranscriptional regulatory protein 2C C-terminal          |
| Porphyromonas endodontalis        | VBIPorEnd1195_0858        | Serine threonine-protein kinase PknA EC 2.7.11.1                                     |
| Porphyromonas endodontalis        | VBIPorEnd1195_0349        | Translation elongation factor Tu                                                     |
| Porphyromonas endodontalis        | VBIPorEnd1195_1542        | UDP-glucose 4-epimerase EC 5.1.3.2                                                   |
| Porphyromonas endodontalis        | VBIPorEnd1195_0718        | UDP-glucose dehydrogenase EC 1.1.1.22                                                |
| Porphyromonas gingivalis          | VBIPorGin26334_1678       | 2 2C3 2C4 2C5-tetrahydropyridine-2 2C6-dicarboxylate N-acetyltransferase EC 2.3.1.89 |
| Porphyromonas gingivalis          | VBIPorGin239392_0427      | 2 2C3 2C4 2C5-tetrahydropyridine-2 2C6-dicarboxylate N-acetyltransferase EC 2.3.1.89 |
| Porphyromonas gingivalis          | VBIPorGin239392_1357      | 2-Keto-3-deoxy-D-manno-octulosonate-8-phosphate synthase EC 2.5.1.55                 |
| Porphyromonas gingivalis          | VBIPorGin26334_1494       | 2-Keto-3-deoxy-D-manno-octulosonate-8-phosphate synthase EC 2.5.1.55                 |
| Porphyromonas gingivalis          | VBIPorGin239392_1440      | 3-deoxy-D-manno-octulosonic-acid transferase EC 2.-.-.-                              |
| Porphyromonas gingivalis          | VBIPorGin239392_0254      | 3-deoxy-manno-octulosonate cytidyltransferase EC 2.7.7.38                            |
| Porphyromonas gingivalis          | VBIPorGin26334_1474       | 3-oxoacyl-acyl-carrier protein reductase EC 1.1.1.100                                |
| Porphyromonas gingivalis          | VBIPorGin195531_1782      | 3-oxoacyl-acyl-carrier protein reductase EC 1.1.1.100                                |
| Porphyromonas gingivalis          | VBIPorGin239392_1955      | 3-oxoacyl-acyl-carrier protein reductase EC 1.1.1.100                                |
| Porphyromonas gingivalis          | VBIPorGin239392_1965      | 3-oxoacyl-acyl-carrier-protein synthase 2C KASII EC 2.3.1.41                         |
| Porphyromonas gingivalis          | VBIPorGin239392_0183      | 3-oxoacyl-acyl-carrier-protein synthase 2C KASII EC 2.3.1.41                         |
| Porphyromonas gingivalis          | VBIPorGin134034_1182      | 3-oxoacyl-acyl-carrier-protein synthase 2C KASII EC 2.3.1.41                         |
| Porphyromonas gingivalis          | VBIPorGin26334_1887       | 8-amino-7-oxononanoate synthase EC 2.3.1.47                                          |
| Porphyromonas gingivalis          | VBIPorGin26334_0993       | 8-amino-7-oxononanoate synthase EC 2.3.1.47                                          |
| Porphyromonas gingivalis          | VBIPorGin239392_1944      | 8-amino-7-oxononanoate synthase EC 2.3.1.47                                          |
| Porphyromonas gingivalis          | VBIPorGin239392_0191      | 8-amino-7-oxononanoate synthase EC 2.3.1.47                                          |
| Porphyromonas gingivalis          | VBIPorGin195531_1771      | 8-amino-7-oxononanoate synthase EC 2.3.1.47                                          |
| Porphyromonas gingivalis          | VBIPorGin134034_0687      | ABC transporter 2C ATP-binding protein                                               |
| Porphyromonas gingivalis          | VBIPorGin26334_1434       | ABC transporter 2C ATP-binding protein                                               |
| Porphyromonas gingivalis          | VBIPorGin239392_1690      | ABC transporter 2C ATP-binding protein                                               |
| Porphyromonas gingivalis          | VBIPorGin26334_0670       | ABC transporter 2C ATP-binding protein                                               |
| Porphyromonas gingivalis          | VBIPorGin239392_0156      | ABC transporter 2C ATP-binding protein 2C MsbA family                                |
| Porphyromonas gingivalis          | VBIPorGin26334_1485       | ABC transporter 2C ATP-binding protein 2C MsbA family                                |
| Porphyromonas gingivalis          | VBIPorGin239392_1848      | ABC transporter 2C ATP-binding protein 2C putative                                   |
| Porphyromonas gingivalis          | VBIPorGin195531_1733      | ABC transporter 2C ATP-binding protein 2C putative                                   |
| Porphyromonas gingivalis          | VBIPorGin26334_0697       | ABC transporter 2C ATP-binding protein 2C putative                                   |
| Porphyromonas gingivalis          | VBIPorGin195531_0627      | ABC transporter 2C ATP-binding protein 2C putative                                   |
| Porphyromonas gingivalis          | VBIPorGin26334_0698       | ABC transporter ATP-binding protein                                                  |
| Porphyromonas gingivalis          | VBIPorGin134034_0616      | ABC transporter ATP-binding protein                                                  |
| Porphyromonas gingivalis          | VBIPorGin195531_0043      | ABC transporter ATP-binding protein                                                  |
| Porphyromonas gingivalis          | VBIPorGin195531_1749      | ABC transporter ATP-binding protein                                                  |
| Porphyromonas gingivalis          | VBIPorGin239392_1936      | ABC transporter ATP-binding protein                                                  |
| Porphyromonas gingivalis          | VBIPorGin239392_0121      | ABC transporter ATP-binding protein YvcR                                             |
| Porphyromonas gingivalis          | VBIPorGin195531_0711      | Acyl-acyl-carrier-protein--UDP-N- acetylglucosamine O-acyltransferase EC 2.3.1.129   |
| Porphyromonas gingivalis          | VBIPorGin239392_0939      | Acyl-acyl-carrier-protein--UDP-N- acetylglucosamine O-acyltransferase EC 2.3.1.129   |
| Porphyromonas gingivalis          | VBIPorGin26334_1202       | Acyl-acyl-carrier-protein--UDP-N- acetylglucosamine O-acyltransferase EC 2.3.1.129   |
| Porphyromonas gingivalis          | VBIPorGin134034_0632      | Alcohol dehydrogenase EC 1.1.1.1                                                     |
| Porphyromonas gingivalis          | VBIPorGin134034_0649      | Alcohol dehydrogenase EC 1.1.1.1                                                     |
| Porphyromonas gingivalis          | VBIPorGin195531_1325      | Alkyl hydroperoxide reductase protein C EC 1.6.4.-                                   |
| Porphyromonas gingivalis          | VBIPorGin134034_0398      | Alkyl hydroperoxide reductase protein C EC 1.6.4.-                                   |
| Porphyromonas gingivalis          | VBIPorGin134034_1099      | Alkyl hydroperoxide reductase protein C EC 1.6.4.-                                   |
| Porphyromonas gingivalis          | VBIPorGin26334_1563       | Alkyl hydroperoxide reductase protein C EC 1.6.4.-                                   |
| Porphyromonas gingivalis          | VBIPorGin134034_1667      | Alkyl hydroperoxide reductase protein C EC 1.6.4.-                                   |
| Porphyromonas gingivalis          | VBIPorGin26334_0230       | Alkyl hydroperoxide reductase protein C EC 1.6.4.-                                   |
| Porphyromonas gingivalis          | VBIPorGin195531_0728      | Arabinose 5-phosphate isomerase EC 5.3.1.13                                          |
| Porphyromonas gingivalis          | VBIPorGin239392_0960      | Arabinose 5-phosphate isomerase EC 5.3.1.13                                          |
| Porphyromonas gingivalis          | VBIPorGin195531_0002      | Aspartate 1-decarboxylase EC 4.1.1.11                                                |
| Porphyromonas gingivalis          | VBIPorGin134034_1680      | ATP-dependent Clp protease ATP-binding subunit ClpA                                  |
| Porphyromonas gingivalis          | VBIPorGin195531_0708      | ATP-dependent Clp protease ATP-binding subunit ClpA                                  |
| Porphyromonas gingivalis          | VBIPorGin134034_0589      | ATPase component of general energizing module of ECF transporters                    |
| Porphyromonas gingivalis          | VBIPorGin134034_0178      | ATPase component of general energizing module of ECF transporters                    |
| Porphyromonas gingivalis          | VBIPorGin195531_1679      | bacterial sugar transferase                                                          |
| Porphyromonas gingivalis          | VBIPorGin239392_0826      | bacterial sugar transferase                                                          |
| Porphyromonas gingivalis          | VBIPorGin26334_0927       | bacterial sugar transferase                                                          |
| Porphyromonas gingivalis          | VBIPorGin26334_1696       | bacterial sugar transferase                                                          |
| Porphyromonas gingivalis          | VBIPorGin239392_0295      | bacterial sugar transferase                                                          |
| Porphyromonas gingivalis          | VBIPorGin26334_0037       | Carbonic anhydrase EC 4.2.1.1                                                        |
| Porphyromonas gingivalis          | VBIPorGin134034_0078      | cation-transporting ATPase PaCL                                                      |
| Porphyromonas gingivalis          | VBIPorGin134034_0107      | cation-transporting ATPase PaCL                                                      |
| Porphyromonas gingivalis          | VBIPorGin239392_0409      | Cell division transporter 2C ATP-binding protein FtsE TC 3.A.5.1.1                   |
| Porphyromonas gingivalis          | VBIPorGin26334_1738       | Cell division transporter 2C ATP-binding protein FtsE TC 3.A.5.1.1                   |
| Porphyromonas gingivalis          | VBIPorGin195531_0369      | ClpB protein                                                                         |
| Porphyromonas gingivalis          | VBIPorGin26334_0933       | ClpB protein                                                                         |
| Porphyromonas gingivalis          | VBIPorGin134034_0543      | ClpB protein                                                                         |
| Porphyromonas gingivalis          | VBIPorGin195531_1657      | ClpB protein                                                                         |
| Porphyromonas gingivalis          | VBIPorGin239392_0375      | Diaminopimelate decarboxylase EC 4.1.1.20                                            |
| Porphyromonas gingivalis          | VBIPorGin26334_1739       | Diaminopimelate decarboxylase EC 4.1.1.20                                            |

Table S8

|                          |                      |                                                                                                      |
|--------------------------|----------------------|------------------------------------------------------------------------------------------------------|
| Porphyromonas gingivalis | VBIPorGin239392_0580 | Diaminopimelate decarboxylase EC 4.1.1.20                                                            |
| Porphyromonas gingivalis | VBIPorGin26334_0369  | DNA-binding response regulator                                                                       |
| Porphyromonas gingivalis | VBIPorGin239392_1078 | Dolichol-phosphate mannosyltransferase EC 2.4.1.83 in lipid-linked oligosaccharide synthesis cluster |
| Porphyromonas gingivalis | VBIPorGin239392_0023 | dTDP-4-dehydrorhamnose 3 2C5-epimerase EC 5.1.3.13                                                   |
| Porphyromonas gingivalis | VBIPorGin239392_1454 | dTDP-4-dehydrorhamnose 3 2C5-epimerase EC 5.1.3.13                                                   |
| Porphyromonas gingivalis | VBIPorGin195531_2154 | dTDP-glucose 4 2C6-dehydratase EC 4.2.1.46                                                           |
| Porphyromonas gingivalis | VBIPorGin26334_1592  | dTDP-glucose 4 2C6-dehydratase EC 4.2.1.46                                                           |
| Porphyromonas gingivalis | VBIPorGin134034_0063 | dTDP-glucose 4 2C6-dehydratase EC 4.2.1.46                                                           |
| Porphyromonas gingivalis | VBIPorGin239392_0270 | Enolase EC 4.2.1.11                                                                                  |
| Porphyromonas gingivalis | VBIPorGin134034_0542 | Enolase EC 4.2.1.11                                                                                  |
| Porphyromonas gingivalis | VBIPorGin239392_0764 | Enolase EC 4.2.1.11                                                                                  |
| Porphyromonas gingivalis | VBIPorGin134034_1066 | Enolase EC 4.2.1.11                                                                                  |
| Porphyromonas gingivalis | VBIPorGin26334_1241  | Enolase EC 4.2.1.11                                                                                  |
| Porphyromonas gingivalis | VBIPorGin26334_1998  | Ferrochelatase 2C protoheme ferro-lyase EC 4.99.1.1                                                  |
| Porphyromonas gingivalis | VBIPorGin26334_0660  | Ferrous iron transport protein B                                                                     |
| Porphyromonas gingivalis | VBIPorGin26334_0544  | Ferrous iron transport protein B                                                                     |
| Porphyromonas gingivalis | VBIPorGin134034_1278 | Ferrous iron transport protein B                                                                     |
| Porphyromonas gingivalis | VBIPorGin239392_1698 | Ferrous iron transport protein B                                                                     |
| Porphyromonas gingivalis | VBIPorGin134034_1037 | Ferrous iron transport protein B                                                                     |
| Porphyromonas gingivalis | VBIPorGin195531_2118 | FIG00935712 hypothetical protein                                                                     |
| Porphyromonas gingivalis | VBIPorGin26334_1605  | FIG00935712 hypothetical protein                                                                     |
| Porphyromonas gingivalis | VBIPorGin239392_1573 | FIG00935712 hypothetical protein                                                                     |
| Porphyromonas gingivalis | VBIPorGin26334_0465  | FIG00935743 hypothetical protein                                                                     |
| Porphyromonas gingivalis | VBIPorGin195531_1111 | FIG00936311 hypothetical protein                                                                     |
| Porphyromonas gingivalis | VBIPorGin26334_0007  | FIG00936311 hypothetical protein                                                                     |
| Porphyromonas gingivalis | VBIPorGin26334_1070  | FIG00936311 hypothetical protein                                                                     |
| Porphyromonas gingivalis | VBIPorGin26334_1069  | FIG00936311 hypothetical protein                                                                     |
| Porphyromonas gingivalis | VBIPorGin239392_2041 | FIG00936311 hypothetical protein                                                                     |
| Porphyromonas gingivalis | VBIPorGin26334_0999  | FIG00936311 hypothetical protein                                                                     |
| Porphyromonas gingivalis | VBIPorGin195531_1112 | FIG00936311 hypothetical protein                                                                     |
| Porphyromonas gingivalis | VBIPorGin239392_2009 | FIG00936311 hypothetical protein                                                                     |
| Porphyromonas gingivalis | VBIPorGin195531_1076 | FIG00936311 hypothetical protein                                                                     |
| Porphyromonas gingivalis | VBIPorGin26334_0731  | FKBP-type peptidyl-prolyl cis-trans isomerase FkIB EC 5.2.1.8                                        |
| Porphyromonas gingivalis | VBIPorGin195531_1503 | FKBP-type peptidyl-prolyl cis-trans isomerase FkIB EC 5.2.1.8                                        |
| Porphyromonas gingivalis | VBIPorGin195531_0222 | FKBP-type peptidyl-prolyl cis-trans isomerase fklB EC 5.2.1.8                                        |
| Porphyromonas gingivalis | VBIPorGin195531_0082 | FKBP-type peptidyl-prolyl cis-trans isomerase fklB EC 5.2.1.8                                        |
| Porphyromonas gingivalis | VBIPorGin26334_0296  | FKBP-type peptidyl-prolyl cis-trans isomerase FkIB EC 5.2.1.8                                        |
| Porphyromonas gingivalis | VBIPorGin195531_1457 | FKBP-type peptidyl-prolyl cis-trans isomerase FkpA precursor EC 5.2.1.8                              |
| Porphyromonas gingivalis | VBIPorGin26334_0260  | FKBP-type peptidyl-prolyl cis-trans isomerase FkpA precursor EC 5.2.1.8                              |
| Porphyromonas gingivalis | VBIPorGin26334_0742  | FKBP-type peptidyl-prolyl cis-trans isomerase FkpA precursor EC 5.2.1.8                              |
| Porphyromonas gingivalis | VBIPorGin195531_0377 | GDP-L-fucose synthetase EC 1.1.1.271                                                                 |
| Porphyromonas gingivalis | VBIPorGin26334_1229  | GDP-L-fucose synthetase EC 1.1.1.271                                                                 |
| Porphyromonas gingivalis | VBIPorGin26334_0545  | GDP-mannose 4 2C6 dehydratase EC 4.2.1.47                                                            |
| Porphyromonas gingivalis | VBIPorGin195531_2015 | GDP-mannose 4 2C6 dehydratase EC 4.2.1.47                                                            |
| Porphyromonas gingivalis | VBIPorGin134034_1449 | Glucose-1-phosphate thymidyltransferase EC 2.7.7.24                                                  |
| Porphyromonas gingivalis | VBIPorGin239392_1443 | Glucose-1-phosphate thymidyltransferase EC 2.7.7.24                                                  |
| Porphyromonas gingivalis | VBIPorGin239392_0081 | Glucose-1-phosphate thymidyltransferase EC 2.7.7.24                                                  |
| Porphyromonas gingivalis | VBIPorGin26334_1316  | Glycosyl transferase                                                                                 |
| Porphyromonas gingivalis | VBIPorGin195531_1027 | Glycosyl transferase                                                                                 |
| Porphyromonas gingivalis | VBIPorGin195531_1708 | Glycosyl transferase 2C family 2                                                                     |
| Porphyromonas gingivalis | VBIPorGin239392_1734 | Glycosyl transferase 2C family 2                                                                     |
| Porphyromonas gingivalis | VBIPorGin26334_0729  | Glycosyl transferase 2C group 2 family protein                                                       |
| Porphyromonas gingivalis | VBIPorGin195531_1541 | Glycosyl transferase 2C group 2 family protein                                                       |
| Porphyromonas gingivalis | VBIPorGin26334_1317  | Glycosyltransferase                                                                                  |
| Porphyromonas gingivalis | VBIPorGin134034_1107 | Glycosyltransferase EC 2.4.1.-                                                                       |
| Porphyromonas gingivalis | VBIPorGin239392_0091 | GTP pyrophosphokinase EC 2.7.6.5 2C pppGpp synthetase I                                              |
| Porphyromonas gingivalis | VBIPorGin134034_1056 | GTP pyrophosphokinase EC 2.7.6.5 2C pppGpp synthetase I                                              |
| Porphyromonas gingivalis | VBIPorGin239392_1438 | GTP pyrophosphokinase EC 2.7.6.5 2C pppGpp synthetase I                                              |
| Porphyromonas gingivalis | VBIPorGin195531_0041 | GTP pyrophosphokinase EC 2.7.6.5 2C pppGpp synthetase II                                             |
| Porphyromonas gingivalis | VBIPorGin26334_1263  | GTP pyrophosphokinase EC 2.7.6.5 2C pppGpp synthetase II                                             |
| Porphyromonas gingivalis | VBIPorGin134034_1978 | GTP pyrophosphokinase EC 2.7.6.5 2C pppGpp synthetase II                                             |
| Porphyromonas gingivalis | VBIPorGin239392_0765 | GTP pyrophosphokinase EC 2.7.6.5 2C pppGpp synthetase II                                             |
| Porphyromonas gingivalis | VBIPorGin134034_1448 | Heat shock protein 60 family chaperone GroEL                                                         |
| Porphyromonas gingivalis | VBIPorGin26334_1888  | Heat shock protein 60 family chaperone GroEL                                                         |
| Porphyromonas gingivalis | VBIPorGin134034_0042 | Heat shock protein 60 family chaperone GroEL                                                         |
| Porphyromonas gingivalis | VBIPorGin134034_1053 | Heat shock protein 60 family chaperone GroEL                                                         |
| Porphyromonas gingivalis | VBIPorGin239392_1345 | Hemolysins and related proteins containing CBS domains                                               |
| Porphyromonas gingivalis | VBIPorGin26334_0090  | Hemolysins and related proteins containing CBS domains                                               |
| Porphyromonas gingivalis | VBIPorGin26334_0651  | Hemolysins and related proteins containing CBS domains                                               |
| Porphyromonas gingivalis | VBIPorGin26334_1508  | Hemolysins and related proteins containing CBS domains                                               |
| Porphyromonas gingivalis | VBIPorGin195531_0580 | Hemolysins and related proteins containing CBS domains                                               |
| Porphyromonas gingivalis | VBIPorGin195531_1124 | Hemolysins and related proteins containing CBS domains                                               |
| Porphyromonas gingivalis | VBIPorGin195531_1015 | Hemolysins and related proteins containing CBS domains                                               |
| Porphyromonas gingivalis | VBIPorGin26334_1726  | HtrA protease chaperone protein                                                                      |
| Porphyromonas gingivalis | VBIPorGin26334_0223  | HtrA protease chaperone protein                                                                      |
| Porphyromonas gingivalis | VBIPorGin195531_1253 | HtrA protease chaperone protein                                                                      |
| Porphyromonas gingivalis | VBIPorGin134034_0065 | HtrA protease chaperone protein                                                                      |
| Porphyromonas gingivalis | VBIPorGin195531_0061 | hypothetical protein                                                                                 |
| Porphyromonas gingivalis | VBIPorGin134034_1569 | hypothetical protein                                                                                 |

|                          |                      |                                                                                                            |
|--------------------------|----------------------|------------------------------------------------------------------------------------------------------------|
| Porphyromonas gingivalis | VBIPorGin134034_1591 | hypothetical protein                                                                                       |
| Porphyromonas gingivalis | VBIPorGin134034_1668 | hypothetical protein                                                                                       |
| Porphyromonas gingivalis | VBIPorGin195531_1421 | iron compound ABC transporter 2C ATP-binding protein                                                       |
| Porphyromonas gingivalis | VBIPorGin26334_0249  | iron compound ABC transporter 2C ATP-binding protein                                                       |
| Porphyromonas gingivalis | VBIPorGin195531_0329 | Lipid A export ATP-binding permease protein MsbA EC 3.6.3.25                                               |
| Porphyromonas gingivalis | VBIPorGin26334_1589  | Lipid-A-disaccharide synthase EC 2.4.1.182                                                                 |
| Porphyromonas gingivalis | VBIPorGin134034_1631 | Lipopolysaccharide ABC transporter 2C ATP-binding protein LptB                                             |
| Porphyromonas gingivalis | VBIPorGin195531_0260 | Lipopolysaccharide ABC transporter 2C ATP-binding protein LptB                                             |
| Porphyromonas gingivalis | VBIPorGin26334_1517  | Lipopolysaccharide ABC transporter 2C ATP-binding protein LptB                                             |
| Porphyromonas gingivalis | VBIPorGin239392_0155 | Lipoprotein releasing system ATP-binding protein LolD                                                      |
| Porphyromonas gingivalis | VBIPorGin26334_0675  | Lipoprotein releasing system ATP-binding protein LolD                                                      |
| Porphyromonas gingivalis | VBIPorGin239392_1372 | Lipoprotein releasing system ATP-binding protein LolD                                                      |
| Porphyromonas gingivalis | VBIPorGin239392_1319 | Malonyl CoA-acyl carrier protein transacylase EC 2.3.1.39                                                  |
| Porphyromonas gingivalis | VBIPorGin26334_2018  | Malonyl CoA-acyl carrier protein transacylase EC 2.3.1.39                                                  |
| Porphyromonas gingivalis | VBIPorGin239392_1219 | Malonyl CoA-acyl carrier protein transacylase EC 2.3.1.39                                                  |
| Porphyromonas gingivalis | VBIPorGin239392_1298 | Malonyl CoA-acyl carrier protein transacylase EC 2.3.1.39                                                  |
| Porphyromonas gingivalis | VBIPorGin239392_1229 | Malonyl CoA-acyl carrier protein transacylase EC 2.3.1.39                                                  |
| Porphyromonas gingivalis | VBIPorGin26334_2043  | Malonyl CoA-acyl carrier protein transacylase EC 2.3.1.39                                                  |
| Porphyromonas gingivalis | VBIPorGin134034_0108 | Maltose maltodextrin transport ATP-binding protein MalK EC 3.6.3.19                                        |
| Porphyromonas gingivalis | VBIPorGin134034_0320 | Manganese ABC transporter 2C periplasmic-binding protein SitA                                              |
| Porphyromonas gingivalis | VBIPorGin134034_0904 | Manganese superoxide dismutase EC 1.15.1.1                                                                 |
| Porphyromonas gingivalis | VBIPorGin239392_1603 | Manganese superoxide dismutase EC 1.15.1.1                                                                 |
| Porphyromonas gingivalis | VBIPorGin195531_0397 | Manganese superoxide dismutase EC 1.15.1.1                                                                 |
| Porphyromonas gingivalis | VBIPorGin195531_2114 | Manganese superoxide dismutase EC 1.15.1.1                                                                 |
| Porphyromonas gingivalis | VBIPorGin239392_0414 | Mannose-1-phosphate guanylyltransferase GDP EC 2.7.7.22                                                    |
| Porphyromonas gingivalis | VBIPorGin26334_0632  | Mannose-1-phosphate guanylyltransferase GDP EC 2.7.7.22                                                    |
| Porphyromonas gingivalis | VBIPorGin26334_0168  | Mannose-6-phosphate isomerase EC 5.3.1.8                                                                   |
| Porphyromonas gingivalis | VBIPorGin195531_0524 | Membrane-associated zinc metalloprotease                                                                   |
| Porphyromonas gingivalis | VBIPorGin134034_0685 | multidrug ABC transporter 2C ATPase component                                                              |
| Porphyromonas gingivalis | VBIPorGin26334_1182  | N-acetylglucosamine deacetylase EC 3.5.1.- 3R-hydroxymyristoyl-acyl carrier protein dehydratase EC 4.2.1.- |
| Porphyromonas gingivalis | VBIPorGin195531_0445 | N-acetylglucosamine deacetylase EC 3.5.1.- 3R-hydroxymyristoyl-acyl carrier protein dehydratase EC 4.2.1.- |
| Porphyromonas gingivalis | VBIPorGin134034_1091 | NAD-dependent glyceraldehyde-3-phosphate dehydrogenase EC 1.2.1.12                                         |
| Porphyromonas gingivalis | VBIPorGin134034_0562 | NAD-dependent glyceraldehyde-3-phosphate dehydrogenase EC 1.2.1.12                                         |
| Porphyromonas gingivalis | VBIPorGin195531_0077 | NAD-dependent glyceraldehyde-3-phosphate dehydrogenase EC 1.2.1.12                                         |
| Porphyromonas gingivalis | VBIPorGin134034_1527 | NAD-dependent glyceraldehyde-3-phosphate dehydrogenase EC 1.2.1.12                                         |
| Porphyromonas gingivalis | VBIPorGin134034_1092 | NAD-dependent glyceraldehyde-3-phosphate dehydrogenase EC 1.2.1.12                                         |
| Porphyromonas gingivalis | VBIPorGin26334_0967  | NAD-dependent glyceraldehyde-3-phosphate dehydrogenase EC 1.2.1.12                                         |
| Porphyromonas gingivalis | VBIPorGin239392_0343 | NAD-dependent glyceraldehyde-3-phosphate dehydrogenase EC 1.2.1.12                                         |
| Porphyromonas gingivalis | VBIPorGin134034_0009 | Oligopeptide transport ATP-binding protein OppF TC 3.A.1.5.1                                               |
| Porphyromonas gingivalis | VBIPorGin26334_1922  | Ornithine aminotransferase EC 2.6.1.13                                                                     |
| Porphyromonas gingivalis | VBIPorGin195531_1805 | Ornithine aminotransferase EC 2.6.1.13                                                                     |
| Porphyromonas gingivalis | VBIPorGin26334_0631  | Ornithine aminotransferase EC 2.6.1.13                                                                     |
| Porphyromonas gingivalis | VBIPorGin134034_0471 | Ornithine carbamoyltransferase EC 2.1.3.3                                                                  |
| Porphyromonas gingivalis | VBIPorGin134034_0250 | Ornithine carbamoyltransferase EC 2.1.3.3                                                                  |
| Porphyromonas gingivalis | VBIPorGin134034_0651 | Ornithine carbamoyltransferase EC 2.1.3.3                                                                  |
| Porphyromonas gingivalis | VBIPorGin26334_0940  | oxidoreductase 2C Gfo Idh MocA family                                                                      |
| Porphyromonas gingivalis | VBIPorGin239392_0327 | oxidoreductase 2C Gfo Idh MocA family                                                                      |
| Porphyromonas gingivalis | VBIPorGin134034_2043 | Pantoate-beta-alanine ligase EC 6.3.2.1                                                                    |
| Porphyromonas gingivalis | VBIPorGin195531_0710 | Phosphatidate cytidyltransferase EC 2.7.7.41                                                               |
| Porphyromonas gingivalis | VBIPorGin26334_0711  | Phosphatidate cytidyltransferase EC 2.7.7.41                                                               |
| Porphyromonas gingivalis | VBIPorGin26334_1734  | Phosphoglucomutase EC 5.4.2.2                                                                              |
| Porphyromonas gingivalis | VBIPorGin239392_0875 | Phosphoglucomutase EC 5.4.2.2                                                                              |
| Porphyromonas gingivalis | VBIPorGin239392_0319 | Phosphoglucomutase EC 5.4.2.2                                                                              |
| Porphyromonas gingivalis | VBIPorGin239392_1816 | Phosphomannomutase EC 5.4.2.8 Phosphoglucosamine mutase EC 5.4.2.10                                        |
| Porphyromonas gingivalis | VBIPorGin134034_1539 | Phosphoribosylaminoimidazole-succinocarboxamide synthase EC 6.3.2.6                                        |
| Porphyromonas gingivalis | VBIPorGin195531_1587 | Phosphoribosylaminoimidazole-succinocarboxamide synthase EC 6.3.2.6                                        |
| Porphyromonas gingivalis | VBIPorGin195531_0037 | Phosphoribosylaminoimidazole-succinocarboxamide synthase EC 6.3.2.6                                        |
| Porphyromonas gingivalis | VBIPorGin239392_1644 | Phosphoribosylaminoimidazole-succinocarboxamide synthase EC 6.3.2.6                                        |
| Porphyromonas gingivalis | VBIPorGin195531_1700 | pigmentation and extracellular proteinase regulator                                                        |
| Porphyromonas gingivalis | VBIPorGin239392_1056 | probable glycosyltransferase                                                                               |
| Porphyromonas gingivalis | VBIPorGin134034_1151 | Probable polybeta-D-mannuronate O-acetylase EC 2.3.1.-                                                     |
| Porphyromonas gingivalis | VBIPorGin195531_1769 | Probable polybeta-D-mannuronate O-acetylase EC 2.3.1.-                                                     |
| Porphyromonas gingivalis | VBIPorGin134034_2066 | Probable polybeta-D-mannuronate O-acetylase EC 2.3.1.-                                                     |
| Porphyromonas gingivalis | VBIPorGin26334_1234  | Probable polybeta-D-mannuronate O-acetylase EC 2.3.1.-                                                     |
| Porphyromonas gingivalis | VBIPorGin239392_1937 | Probable polybeta-D-mannuronate O-acetylase EC 2.3.1.-                                                     |
| Porphyromonas gingivalis | VBIPorGin195531_0864 | Probable UDP-N-acetyl-D-mannosaminuronic acid transferase EC 2.4.1.-                                       |
| Porphyromonas gingivalis | VBIPorGin26334_1982  | Probable UDP-N-acetyl-D-mannosaminuronic acid transferase EC 2.4.1.-                                       |
| Porphyromonas gingivalis | VBIPorGin134034_1435 | Protein export cytoplasm protein SecA ATPase RNA helicase TC 3.A.5.1.1                                     |
| Porphyromonas gingivalis | VBIPorGin195531_1162 | Protein export cytoplasm protein SecA ATPase RNA helicase TC 3.A.5.1.1                                     |
| Porphyromonas gingivalis | VBIPorGin26334_0201  | Protein export cytoplasm protein SecA ATPase RNA helicase TC 3.A.5.1.1                                     |
| Porphyromonas gingivalis | VBIPorGin195531_1214 | Protein export cytoplasm protein SecA ATPase RNA helicase TC 3.A.5.1.1                                     |
| Porphyromonas gingivalis | VBIPorGin134034_1863 | Protein export cytoplasm protein SecA ATPase RNA helicase TC 3.A.5.1.1                                     |
| Porphyromonas gingivalis | VBIPorGin134034_1437 | Protein export cytoplasm protein SecA ATPase RNA helicase TC 3.A.5.1.1                                     |
| Porphyromonas gingivalis | VBIPorGin134034_1822 | Protein export cytoplasm protein SecA ATPase RNA helicase TC 3.A.5.1.1                                     |
| Porphyromonas gingivalis | VBIPorGin26334_0222  | Protein export cytoplasm protein SecA ATPase RNA helicase TC 3.A.5.1.1                                     |
| Porphyromonas gingivalis | VBIPorGin195531_0386 | putative capsular polysaccharide glycosyltransferase                                                       |
| Porphyromonas gingivalis | VBIPorGin134034_1178 | RNA polymerase sigma factor RpoD                                                                           |
| Porphyromonas gingivalis | VBIPorGin26334_0229  | RNA polymerase sigma factor RpoD                                                                           |
| Porphyromonas gingivalis | VBIPorGin195531_1309 | RNA polymerase sigma factor RpoD                                                                           |

Table S8

|                                  |                      |                                                                                                      |
|----------------------------------|----------------------|------------------------------------------------------------------------------------------------------|
| Porphyromonas gingivalis         | VBIPorGin134034_1974 | RNA polymerase sigma factor RpoD                                                                     |
| Porphyromonas gingivalis         | VBIPorGin195531_0367 | RNA polymerase sigma factor RpoD                                                                     |
| Porphyromonas gingivalis         | VBIPorGin134034_0287 | Serine protease 2C DegP HtrA 2C do-like EC 3.4.21.-                                                  |
| Porphyromonas gingivalis         | VBIPorGin134034_1061 | Serine threonine protein kinase PrkC 2C regulator of stationary phase                                |
| Porphyromonas gingivalis         | VBIPorGin26334_0765  | Succinate-semialdehyde dehydrogenase 2C CoA-dependent                                                |
| Porphyromonas gingivalis         | VBIPorGin195531_0327 | Succinate-semialdehyde dehydrogenase 2C CoA-dependent                                                |
| Porphyromonas gingivalis         | VBIPorGin26334_1392  | surface antigen 2C putative                                                                          |
| Porphyromonas gingivalis         | VBIPorGin26334_0543  | surface antigen 2C putative                                                                          |
| Porphyromonas gingivalis         | VBIPorGin195531_2098 | surface antigen 2C putative                                                                          |
| Porphyromonas gingivalis         | VBIPorGin195531_2104 | surface antigen 2C putative                                                                          |
| Porphyromonas gingivalis         | VBIPorGin26334_1363  | surface antigen 2C putative                                                                          |
| Porphyromonas gingivalis         | VBIPorGin26334_0540  | surface antigen 2C putative                                                                          |
| Porphyromonas gingivalis         | VBIPorGin26334_0231  | Tetraacyldisaccharide 4'-kinase EC 2.7.1.130                                                         |
| Porphyromonas gingivalis         | VBIPorGin134034_1196 | TonB-dependent receptor                                                                              |
| Porphyromonas gingivalis         | VBIPorGin134034_1192 | TonB-dependent receptor                                                                              |
| Porphyromonas gingivalis         | VBIPorGin134034_2041 | Transcriptional regulator                                                                            |
| Porphyromonas gingivalis         | VBIPorGin134034_1006 | Transcriptional regulator                                                                            |
| Porphyromonas gingivalis         | VBIPorGin239392_1832 | Transcriptional regulatory protein rprY                                                              |
| Porphyromonas gingivalis         | VBIPorGin26334_0939  | Transcriptional regulatory protein rprY                                                              |
| Porphyromonas gingivalis         | VBIPorGin195531_1656 | Transcriptional regulatory protein rprY                                                              |
| Porphyromonas gingivalis         | VBIPorGin134034_0411 | Translation elongation factor Tu                                                                     |
| Porphyromonas gingivalis         | VBIPorGin134034_1446 | Translation elongation factor Tu                                                                     |
| Porphyromonas gingivalis         | VBIPorGin134034_0954 | Translation elongation factor Tu                                                                     |
| Porphyromonas gingivalis         | VBIPorGin134034_1647 | Translation elongation factor Tu                                                                     |
| Porphyromonas gingivalis         | VBIPorGin26334_0012  | Translation elongation factor Tu                                                                     |
| Porphyromonas gingivalis         | VBIPorGin195531_0379 | two-component response regulator                                                                     |
| Porphyromonas gingivalis         | VBIPorGin26334_0449  | Two-component system response regulator                                                              |
| Porphyromonas gingivalis         | VBIPorGin195531_1528 | Two-component system response regulator                                                              |
| Porphyromonas gingivalis         | VBIPorGin239392_0577 | Two-component system response regulator                                                              |
| Porphyromonas gingivalis         | VBIPorGin195531_1118 | Tyrosine-protein kinase Wzc EC 2.7.10.2                                                              |
| Porphyromonas gingivalis         | VBIPorGin195531_0530 | UDP-2-acetamido-2-deoxy-D-glucuronic acid dehydrogenase NAD+ cofactor                                |
| Porphyromonas gingivalis         | VBIPorGin239392_0956 | UDP-3-O-3-hydroxymyristoyl glucosamine N-acyltransferase EC 2.3.1.-                                  |
| Porphyromonas gingivalis         | VBIPorGin26334_1179  | UDP-3-O-3-hydroxymyristoyl glucosamine N-acyltransferase EC 2.3.1.-                                  |
| Porphyromonas gingivalis         | VBIPorGin195531_0724 | UDP-3-O-3-hydroxymyristoyl glucosamine N-acyltransferase EC 2.3.1.-                                  |
| Porphyromonas gingivalis         | VBIPorGin26334_1073  | UDP-glucose 4-epimerase EC 5.1.3.2                                                                   |
| Porphyromonas gingivalis         | VBIPorGin195531_1071 | UDP-glucose 4-epimerase EC 5.1.3.2                                                                   |
| Porphyromonas gingivalis         | VBIPorGin195531_1707 | UDP-glucose dehydrogenase EC 1.1.1.22                                                                |
| Porphyromonas gingivalis         | VBIPorGin239392_1736 | UDP-glucose dehydrogenase EC 1.1.1.22                                                                |
| Porphyromonas gingivalis         | VBIPorGin26334_1226  | UDP-glucose dehydrogenase EC 1.1.1.22                                                                |
| Porphyromonas gingivalis         | VBIPorGin195531_0013 | UDP-glucose dehydrogenase EC 1.1.1.22                                                                |
| Porphyromonas gingivalis         | VBIPorGin195531_1960 | UDP-glucose dehydrogenase EC 1.1.1.22                                                                |
| Porphyromonas gingivalis         | VBIPorGin26334_0554  | UDP-glucose dehydrogenase EC 1.1.1.22                                                                |
| Porphyromonas gingivalis         | VBIPorGin239392_0961 | UDP-N-acetyl-D-mannosamine dehydrogenase EC 1.1.1.-                                                  |
| Porphyromonas gingivalis         | VBIPorGin195531_0919 | UDP-N-acetylglucosamine 2-epimerase EC 5.1.3.14                                                      |
| Porphyromonas gingivalis         | VBIPorGin239392_1141 | UDP-N-acetylglucosamine 2-epimerase EC 5.1.3.14                                                      |
| Porphyromonas gingivalis         | VBIPorGin26334_1984  | UDP-N-acetylglucosamine 2-epimerase EC 5.1.3.14                                                      |
| Porphyromonas gingivalis         | VBIPorGin239392_1326 | Undecaprenyl pyrophosphate synthetase EC 2.5.1.31                                                    |
| Porphyromonas gingivalis         | VBIPorGin195531_0929 | Undecaprenyl pyrophosphate synthetase EC 2.5.1.31                                                    |
| Porphyromonas gingivalis         | VBIPorGin26334_1628  | Undecaprenyl pyrophosphate synthetase EC 2.5.1.31                                                    |
| Porphyromonas gingivalis         | VBIPorGin195531_0343 | Undecaprenyl-phosphate galactosephosphotransferase EC 2.7.8.6                                        |
| Porphyromonas gingivalis         | VBIPorGin195531_0081 | Undecaprenyl-phosphate galactosephosphotransferase EC 2.7.8.6                                        |
| Porphyromonas gingivalis         | VBIPorGin134034_1688 | V-type ATP synthase subunit A EC 3.6.3.14                                                            |
| Porphyromonas gingivalis         | VBIPorGin26334_1306  | V-type ATP synthase subunit A EC 3.6.3.14                                                            |
| Porphyromonas gingivalis         | VBIPorGin239392_0231 | V-type ATP synthase subunit A EC 3.6.3.14                                                            |
| Porphyromonas gingivalis         | VBIPorGin239392_0815 | V-type ATP synthase subunit A EC 3.6.3.14                                                            |
| Porphyromonas gingivalis         | VBIPorGin26334_1297  | V-type ATP synthase subunit B EC 3.6.3.14                                                            |
| Porphyromonas gingivalis         | VBIPorGin134034_0323 | V-type ATP synthase subunit B EC 3.6.3.14                                                            |
| Porphyromonas gingivalis         | VBIPorGin239392_0234 | V-type ATP synthase subunit B EC 3.6.3.14                                                            |
| Porphyromonas gingivalis         | VBIPorGin239392_0766 | V-type ATP synthase subunit B EC 3.6.3.14                                                            |
| Porphyromonas gingivalis         | VBIPorGin26334_0767  | Vitamin B12 ABC transporter 2C permease component BtuC                                               |
| Porphyromonas gingivalis         | VBIPorGin26334_0844  | Vitamin B12 ABC transporter 2C permease component BtuC                                               |
| Porphyromonas sp. oral taxon 279 | VBIPorSp227785_0775  | 3-deoxy-D-manno-octulosonic-acid transferase EC 2.-.-.-                                              |
| Porphyromonas sp. oral taxon 279 | VBIPorSp227785_1357  | 8-amino-7-oxononanoate synthase EC 2.3.1.47                                                          |
| Porphyromonas sp. oral taxon 279 | VBIPorSp227785_1458  | ABC transporter 2C ATP-binding protein                                                               |
| Porphyromonas sp. oral taxon 279 | VBIPorSp227785_1442  | ABC transporter 2C ATP-binding protein 2C putative                                                   |
| Porphyromonas sp. oral taxon 279 | VBIPorSp227785_1436  | ABC transporter ATP-binding protein                                                                  |
| Porphyromonas sp. oral taxon 279 | VBIPorSp227785_0875  | Alkyl hydroperoxide reductase protein C EC 1.6.4.-                                                   |
| Porphyromonas sp. oral taxon 279 | VBIPorSp227785_0214  | ATP-dependent Clp protease ATP-binding subunit ClpA                                                  |
| Porphyromonas sp. oral taxon 279 | VBIPorSp227785_1648  | bacterial sugar transferase                                                                          |
| Porphyromonas sp. oral taxon 279 | VBIPorSp227785_1461  | Calcium-transporting ATPase                                                                          |
| Porphyromonas sp. oral taxon 279 | VBIPorSp227785_0466  | Cell division transporter 2C ATP-binding protein FtsE TC 3.A.5.1.1                                   |
| Porphyromonas sp. oral taxon 279 | VBIPorSp227785_1617  | ClpB protein                                                                                         |
| Porphyromonas sp. oral taxon 279 | VBIPorSp227785_1133  | DNA-binding response regulator                                                                       |
| Porphyromonas sp. oral taxon 279 | VBIPorSp227785_0595  | Dolichol-phosphate mannosyltransferase EC 2.4.1.83 in lipid-linked oligosaccharide synthesis cluster |
| Porphyromonas sp. oral taxon 279 | VBIPorSp227785_0776  | dTDP-4-dehydrorhamnose 3 2C5-epimerase EC 5.1.3.13                                                   |
| Porphyromonas sp. oral taxon 279 | VBIPorSp227785_0777  | dTDP-4-dehydrorhamnose reductase EC 1.1.1.133                                                        |
| Porphyromonas sp. oral taxon 279 | VBIPorSp227785_0782  | dTDP-glucose 4 2C6-dehydratase EC 4.2.1.46                                                           |
| Porphyromonas sp. oral taxon 279 | VBIPorSp227785_1497  | Ferrous iron transport protein B                                                                     |
| Porphyromonas sp. oral taxon 279 | VBIPorSp227785_0793  | FIG00935712 hypothetical protein                                                                     |

|                                  |                      |                                                                                                                    |
|----------------------------------|----------------------|--------------------------------------------------------------------------------------------------------------------|
| Porphyromonas sp. oral taxon 279 | VBIPorSp227785_0979  | FIG00936204 hypothetical protein                                                                                   |
| Porphyromonas sp. oral taxon 279 | VBIPorSp227785_1108  | FKBP-type peptidyl-prolyl cis-trans isomerase FkIB EC 5.2.1.8                                                      |
| Porphyromonas sp. oral taxon 279 | VBIPorSp227785_1033  | FKBP-type peptidyl-prolyl cis-trans isomerase FkpA precursor EC 5.2.1.8                                            |
| Porphyromonas sp. oral taxon 279 | VBIPorSp227785_1488  | GDP-L-fucose synthetase EC 1.1.1.271                                                                               |
| Porphyromonas sp. oral taxon 279 | VBIPorSp227785_1487  | GDP-mannose 4 2C6 dehydratase EC 4.2.1.47                                                                          |
| Porphyromonas sp. oral taxon 279 | VBIPorSp227785_1281  | Glycosyl transferase 2C group 2 family protein                                                                     |
| Porphyromonas sp. oral taxon 279 | VBIPorSp227785_0196  | GTP pyrophosphokinase EC 2.7.6.5 2C pppGpp synthetase I                                                            |
| Porphyromonas sp. oral taxon 279 | VBIPorSp227785_0812  | HtrA protease chaperone protein                                                                                    |
| Porphyromonas sp. oral taxon 279 | VBIPorSp227785_0931  | iron compound ABC transporter 2C ATP-binding protein                                                               |
| Porphyromonas sp. oral taxon 279 | VBIPorSp227785_0504  | Lipid-A-disaccharide synthase EC 2.4.1.182                                                                         |
| Porphyromonas sp. oral taxon 279 | VBIPorSp227785_0918  | Lipopolysaccharide ABC transporter 2C ATP-binding protein LptB                                                     |
| Porphyromonas sp. oral taxon 279 | VBIPorSp227785_0649  | Malonyl CoA-acyl carrier protein transacylase EC 2.3.1.39                                                          |
| Porphyromonas sp. oral taxon 279 | VBIPorSp227785_0613  | Malonyl CoA-acyl carrier protein transacylase EC 2.3.1.39                                                          |
| Porphyromonas sp. oral taxon 279 | VBIPorSp227785_0748  | Malonyl CoA-acyl carrier protein transacylase EC 2.3.1.39                                                          |
| Porphyromonas sp. oral taxon 279 | VBIPorSp227785_0045  | Malonyl CoA-acyl carrier protein transacylase EC 2.3.1.39                                                          |
| Porphyromonas sp. oral taxon 279 | VBIPorSp227785_0171  | Malonyl CoA-acyl carrier protein transacylase EC 2.3.1.39                                                          |
| Porphyromonas sp. oral taxon 279 | VBIPorSp227785_0720  | Malonyl CoA-acyl carrier protein transacylase EC 2.3.1.39                                                          |
| Porphyromonas sp. oral taxon 279 | VBIPorSp227785_0494  | NAD-dependent glyceraldehyde-3-phosphate dehydrogenase EC 1.2.1.12                                                 |
| Porphyromonas sp. oral taxon 279 | VBIPorSp227785_0406  | Phosphatidate cytidyltransferase EC 2.7.7.41                                                                       |
| Porphyromonas sp. oral taxon 279 | VBIPorSp227785_1602  | Phosphomannomutase EC 5.4.2.8 Phosphoglucosamine mutase EC 5.4.2.10                                                |
| Porphyromonas sp. oral taxon 279 | VBIPorSp227785_1449  | Phosphoribosylaminoimidazole-succinocarboxamide synthase EC 6.3.2.6                                                |
| Porphyromonas sp. oral taxon 279 | VBIPorSp227785_0181  | Phosphoribosylaminoimidazole-succinocarboxamide synthase EC 6.3.2.6                                                |
| Porphyromonas sp. oral taxon 279 | VBIPorSp227785_1705  | pigmentation and extracellular proteinase regulator                                                                |
| Porphyromonas sp. oral taxon 279 | VBIPorSp227785_0540  | probable glycosyltransferase                                                                                       |
| Porphyromonas sp. oral taxon 279 | VBIPorSp227785_1373  | Probable polybeta-D-mannuronate O-acetylase EC 2.3.1.-                                                             |
| Porphyromonas sp. oral taxon 279 | VBIPorSp227785_0596  | Probable UDP-N-acetyl-D-mannosaminuronic acid transferase EC 2.4.1.-                                               |
| Porphyromonas sp. oral taxon 279 | VBIPorSp227785_0829  | RNA polymerase sigma factor RpoD                                                                                   |
| Porphyromonas sp. oral taxon 279 | VBIPorSp227785_0980  | Succinate-semialdehyde dehydrogenase 2C CoA-dependent                                                              |
| Porphyromonas sp. oral taxon 279 | VBIPorSp227785_1327  | surface antigen 2C putative                                                                                        |
| Porphyromonas sp. oral taxon 279 | VBIPorSp227785_1316  | surface antigen 2C putative                                                                                        |
| Porphyromonas sp. oral taxon 279 | VBIPorSp227785_0928  | Tetraacyldisaccharide 4'-kinase EC 2.7.1.130                                                                       |
| Porphyromonas sp. oral taxon 279 | VBIPorSp227785_0177  | Transcriptional regulator                                                                                          |
| Porphyromonas sp. oral taxon 279 | VBIPorSp227785_0763  | Transcriptional regulator                                                                                          |
| Porphyromonas sp. oral taxon 279 | VBIPorSp227785_1530  | Transcriptional regulatory protein rprY                                                                            |
| Porphyromonas sp. oral taxon 279 | VBIPorSp227785_1210  | Two-component system response regulator                                                                            |
| Porphyromonas sp. oral taxon 279 | VBIPorSp227785_0255  | Two-component system response regulator                                                                            |
| Porphyromonas sp. oral taxon 279 | VBIPorSp227785_1709  | UDP-glucose dehydrogenase EC 1.1.1.22                                                                              |
| Porphyromonas sp. oral taxon 279 | VBIPorSp227785_0505  | UDP-N-acetyl-D-mannosamine dehydrogenase EC 1.1.1.-                                                                |
| Porphyromonas sp. oral taxon 279 | VBIPorSp227785_0607  | UDP-N-acetylglucosamine 2-epimerase EC 5.1.3.14                                                                    |
| Porphyromonas sp. oral taxon 279 | VBIPorSp227785_0940  | Vitamin B12 ABC transporter 2C permease component BtuC                                                             |
| Prevotella bivia                 | VBIPreBiv94575_0160  | Glycosyl transferase 2C family 2                                                                                   |
| Prevotella buccae                | VBIPreBuc167547_2107 | ABC transporter 2C ATP-binding protein                                                                             |
| Prevotella buccae                | VBIPreBuc31492_1479  | branched chain amino acid transport ATP-binding protein                                                            |
| Prevotella buccae                | VBIPreBuc167547_1908 | Diaminopimelate decarboxylase EC 4.1.1.20                                                                          |
| Prevotella buccae                | VBIPreBuc167547_1943 | Ferrous iron transport protein B                                                                                   |
| Prevotella buccalis              | VBIPreBuc139135_0582 | 3-oxoacyl-acyl-carrier protein reductase EC 1.1.1.100                                                              |
| Prevotella buccalis              | VBIPreBuc139135_0269 | branched-chain amino acid ABC transporter 2C ATP-binding protein                                                   |
| Prevotella buccalis              | VBIPreBuc139135_1482 | Carbonic anhydrase EC 4.2.1.1                                                                                      |
| Prevotella buccalis              | VBIPreBuc139135_1971 | FIG00936311 hypothetical protein                                                                                   |
| Prevotella buccalis              | VBIPreBuc139135_2489 | FIG00936311 hypothetical protein                                                                                   |
| Prevotella buccalis              | VBIPreBuc139135_0717 | Heat shock protein 60 family chaperone GroEL                                                                       |
| Prevotella buccalis              | VBIPreBuc139135_1403 | Hemolysins and related proteins containing CBS domains                                                             |
| Prevotella buccalis              | VBIPreBuc139135_1226 | Mannose-6-phosphate isomerase EC 5.3.1.8                                                                           |
| Prevotella buccalis              | VBIPreBuc139135_1968 | Membrane-associated zinc metalloprotease                                                                           |
| Prevotella buccalis              | VBIPreBuc139135_0614 | Ornithine aminotransferase EC 2.6.1.13                                                                             |
| Prevotella buccalis              | VBIPreBuc139135_0931 | Pantoate--beta-alanine ligase EC 6.3.2.1                                                                           |
| Prevotella buccalis              | VBIPreBuc139135_1415 | Tyrosine-protein kinase Wzc EC 2.7.10.2                                                                            |
| Prevotella dentalis              | VBIPreDen174784_1921 | 3-oxoacyl-acyl-carrier-protein synthase 2C KASII EC 2.3.1.41                                                       |
| Prevotella dentalis              | VBIPreDen174784_2244 | 8-amino-7-oxononanoate synthase EC 2.3.1.47                                                                        |
| Prevotella dentalis              | VBIPreDen174784_0554 | Glycosyl transferase                                                                                               |
| Prevotella dentalis              | VBIPreDen174784_0402 | Glycosyltransferase                                                                                                |
| Prevotella dentalis              | VBIPreDen174784_0049 | UDP-glucose 4-epimerase EC 5.1.3.2                                                                                 |
| Prevotella denticola             | VBIPreDen163057_0769 | 3-deoxy-manno-octulosonate cytidyltransferase EC 2.7.7.38                                                          |
| Prevotella denticola             | VBIPreDen163057_1289 | ABC transporter 2C ATP-binding protein 2C putative                                                                 |
| Prevotella denticola             | VBIPreDen163057_1357 | ABC transporter ATP-binding protein                                                                                |
| Prevotella denticola             | VBIPreDen163057_1483 | Acyl-acyl-carrier-protein--UDP-N- acetylglucosamine O-acyltransferase EC 2.3.1.129                                 |
| Prevotella denticola             | VBIPreDen163057_2026 | Arabinose 5-phosphate isomerase EC 5.3.1.13                                                                        |
| Prevotella denticola             | VBIPreDen163057_0860 | GTP pyrophosphokinase EC 2.7.6.5 2C pppGpp synthetase II Guanosine-3' 2C5'-bisdiphosphate 3'-pyrophosphohydrolyase |
| Prevotella denticola             | VBIPreDen177924_0861 | Mannose-1-phosphate guanylyltransferase GDP EC 2.7.7.22                                                            |
| Prevotella denticola             | VBIPreDen177924_0865 | Mannose-6-phosphate isomerase EC 5.3.1.8                                                                           |
| Prevotella denticola             | VBIPreDen177924_2584 | Nucleoside 5-triphosphatase RdgB dHAPT 2C dTTP 2C XTP-specific EC 3.6.1.15                                         |
| Prevotella denticola             | VBIPreDen177924_0382 | oxidoreductase 2C short chain dehydrogenase reductase family                                                       |
| Prevotella denticola             | VBIPreDen163057_1474 | Phosphoglucosmutase EC 5.4.2.2                                                                                     |
| Prevotella denticola             | VBIPreDen177924_2187 | transferrin-binding protein A                                                                                      |
| Prevotella denticola             | VBIPreDen163057_1649 | UDP-3-O-3-hydroxymyristoyl glucosamine N-acyltransferase EC 2.3.1.-                                                |
| Prevotella denticola             | VBIPreDen163057_1121 | V-type ATP synthase subunit A EC 3.6.3.14                                                                          |
| Prevotella denticola             | VBIPreDen163057_0904 | V-type ATP synthase subunit B EC 3.6.3.14                                                                          |
| Prevotella histicola             | VBIPreHis163117_0372 | 2-Keto-3-deoxy-D-manno-octulosonate-8-phosphate synthase EC 2.5.1.55                                               |
| Prevotella histicola             | VBIPreHis163117_0710 | Cell division transporter 2C ATP-binding protein FtsE TC 3.A.5.1.1                                                 |

Table S8

|                           |                      |                                                                                                                    |
|---------------------------|----------------------|--------------------------------------------------------------------------------------------------------------------|
| Prevotella histicola      | VBIPreHis163117_2456 | ClpB protein                                                                                                       |
| Prevotella histicola      | VBIPreHis163117_1180 | Mannose-1-phosphate guanylyltransferase GDP EC 2.7.7.22                                                            |
| Prevotella histicola      | VBIPreHis163117_0716 | Pantoate-beta-alanine ligase EC 6.3.2.1                                                                            |
| Prevotella histicola      | VBIPreHis163117_0031 | Superoxide dismutase Fe EC 1.15.1.1                                                                                |
| Prevotella intermedia     | VBIPreInt119176_0360 | 8-amino-7-oxononanoate synthase EC 2.3.1.47                                                                        |
| Prevotella intermedia     | VBIPreInt119176_1062 | ABC transporter 2C ATP-binding protein                                                                             |
| Prevotella intermedia     | VBIPreInt119176_1760 | Acetoin dehydrogenase E1 component beta-subunit EC 1.2.4.-                                                         |
| Prevotella intermedia     | VBIPreInt119176_1011 | Acyl-acyl-carrier-protein-UDP-N- acetylglucosamine O-acyltransferase EC 2.3.1.129                                  |
| Prevotella intermedia     | VBIPreInt119176_0445 | Acyl-acyl-carrier-protein-UDP-N- acetylglucosamine O-acyltransferase EC 2.3.1.129                                  |
| Prevotella intermedia     | VBIPreInt119176_2040 | Alkyl hydroperoxide reductase protein C EC 1.6.4.-                                                                 |
| Prevotella intermedia     | VBIPreInt119176_0311 | ATP-dependent Clp protease 2C ATP-binding subunit ClpC Negative regulator of genetic competence clcC mecB          |
| Prevotella intermedia     | VBIPreInt119176_0102 | bacterial sugar transferase                                                                                        |
| Prevotella intermedia     | VBIPreInt119176_2001 | Calcium-transporting ATPase                                                                                        |
| Prevotella intermedia     | VBIPreInt119176_2158 | dTDP-glucose 4 2C6-dehydratase EC 4.2.1.46                                                                         |
| Prevotella intermedia     | VBIPreInt119176_1745 | Ferrous iron transport protein B                                                                                   |
| Prevotella intermedia     | VBIPreInt119176_2202 | Ferrous iron transport protein B                                                                                   |
| Prevotella intermedia     | VBIPreInt119176_2197 | GDP-L-fucose synthetase EC 1.1.1.1271                                                                              |
| Prevotella intermedia     | VBIPreInt119176_1647 | Glutamyl-tRNA reductase EC 1.2.1.70                                                                                |
| Prevotella intermedia     | VBIPreInt119176_2194 | Glycosyl transferase 2C group 2 family protein                                                                     |
| Prevotella intermedia     | VBIPreInt119176_2004 | Glycosyltransferase                                                                                                |
| Prevotella intermedia     | VBIPreInt119176_0175 | Glycosyltransferase                                                                                                |
| Prevotella intermedia     | VBIPreInt119176_1986 | GTP pyrophosphokinase EC 2.7.6.5 2C pppGpp synthetase I                                                            |
| Prevotella intermedia     | VBIPreInt119176_1684 | GTP pyrophosphokinase EC 2.7.6.5 2C pppGpp synthetase II                                                           |
| Prevotella intermedia     | VBIPreInt119176_2106 | Guanosine-3' 2C5'-bisdiphosphate 3'-pyrophosphohydrola                                                             |
| Prevotella intermedia     | VBIPreInt119176_2090 | Hemolysins and related proteins containing CBS domains                                                             |
| Prevotella intermedia     | VBIPreInt119176_2266 | Hemolysins and related proteins containing CBS domains                                                             |
| Prevotella intermedia     | VBIPreInt119176_2275 | iron compound ABC transporter 2C ATP-binding protein                                                               |
| Prevotella intermedia     | VBIPreInt119176_0219 | iron compound ABC transporter 2C permease protein                                                                  |
| Prevotella intermedia     | VBIPreInt119176_2151 | Lipid-A-disaccharide synthase EC 2.4.1.182                                                                         |
| Prevotella intermedia     | VBIPreInt119176_1061 | Lipoate-protein ligase A                                                                                           |
| Prevotella intermedia     | VBIPreInt119176_0601 | Lipopolysaccharide ABC transporter 2C ATP-binding protein LptB                                                     |
| Prevotella intermedia     | VBIPreInt119176_0601 | Lipoprotein releasing system ATP-binding protein LolD                                                              |
| Prevotella intermedia     | VBIPreInt119176_0632 | Malonyl CoA-acyl carrier protein transacylase EC 2.3.1.39                                                          |
| Prevotella intermedia     | VBIPreInt119176_0730 | Malonyl CoA-acyl carrier protein transacylase EC 2.3.1.39                                                          |
| Prevotella intermedia     | VBIPreInt119176_0634 | Malonyl CoA-acyl carrier protein transacylase EC 2.3.1.39                                                          |
| Prevotella intermedia     | VBIPreInt119176_0661 | Malonyl CoA-acyl carrier protein transacylase EC 2.3.1.39                                                          |
| Prevotella intermedia     | VBIPreInt119176_0680 | Malonyl CoA-acyl carrier protein transacylase EC 2.3.1.39                                                          |
| Prevotella intermedia     | VBIPreInt119176_0879 | N-acetylglucosamine deacetylase EC 3.5.1.-                                                                         |
| Prevotella intermedia     | VBIPreInt119176_2083 | 3R-hydroxymyristoyl-acyl carrier protein dehydratase EC 4.2.1.-                                                    |
| Prevotella intermedia     | VBIPreInt119176_1160 | Phosphatidate cytidyltransferase EC 2.7.7.41                                                                       |
| Prevotella intermedia     | VBIPreInt119176_1487 | Phosphomannomutase EC 5.4.2.8                                                                                      |
| Prevotella intermedia     | VBIPreInt119176_2221 | Phosphoglucomutase EC 5.4.2.2                                                                                      |
| Prevotella intermedia     | VBIPreInt119176_0469 | Probable polybeta-D-mannuronate O-acetylase EC 2.3.1.-                                                             |
| Prevotella intermedia     | VBIPreInt119176_2091 | RNA polymerase sigma factor RpoD                                                                                   |
| Prevotella intermedia     | VBIPreInt119176_0848 | Superoxide dismutase Fe EC 1.15.1.1                                                                                |
| Prevotella intermedia     | VBIPreInt119176_0485 | Transcriptional regulator                                                                                          |
| Prevotella intermedia     | VBIPreInt119176_0010 | UDP-3-O-3-hydroxymyristoyl glucosamine N-acyltransferase EC 2.3.1.-                                                |
| Prevotella intermedia     | VBIPreInt119176_1883 | UDP-glucose dehydrogenase EC 1.1.1.22                                                                              |
| Prevotella intermedia     | VBIPreInt119176_1884 | Undecaprenyl pyrophosphate synthetase EC 2.5.1.31                                                                  |
| Prevotella maculosa       | VBIPreMac187881_2620 | V-type ATP synthase subunit A EC 3.6.3.14                                                                          |
| Prevotella maculosa       | VBIPreMac187881_0593 | V-type ATP synthase subunit B EC 3.6.3.14                                                                          |
| Prevotella maculosa       | VBIPreMac187881_0216 | Acetoin dehydrogenase E1 component alpha-subunit EC 1.2.4.-                                                        |
| Prevotella maculosa       | VBIPreMac187881_0661 | Acetoin dehydrogenase E1 component beta-subunit EC                                                                 |
| Prevotella maculosa       | VBIPreMac187881_2045 | Ferrochelatase 2C protoheme ferro-lyase EC 4.99.1.1                                                                |
| Prevotella maculosa       | VBIPreMac187881_0805 | FKBP-type peptidyl-prolyl cis-trans isomerase FkpA precursor EC 5.2.1.8                                            |
| Prevotella maculosa       | VBIPreMac187881_2359 | Glutamine synthetase type I EC 6.3.1.2                                                                             |
| Prevotella marshii        | VBIPreMar165560_1400 | Glycosyl transferase 2C group 2 family protein                                                                     |
| Prevotella marshii        | VBIPreMar165560_0787 | Membrane-associated zinc metalloprotease                                                                           |
| Prevotella marshii        | VBIPreMar165560_0721 | Methionyl-tRNA formyltransferase EC 2.1.2.9                                                                        |
| Prevotella marshii        | VBIPreMar165560_0499 | Alkyl hydroperoxide reductase protein C EC 1.6.4.-                                                                 |
| Prevotella marshii        | VBIPreMar165560_0671 | Enolase EC 4.2.1.11                                                                                                |
| Prevotella marshii        | VBIPreMar165560_0498 | FIG00939874 hypothetical protein                                                                                   |
| Prevotella marshii        | VBIPreMar165560_0485 | Glutamine synthetase type I EC 6.3.1.2                                                                             |
| Prevotella melaninogenica | VBIPreMel47739_0764  | NAD-dependent glyceraldehyde-3-phosphate dehydrogenase EC 1.2.1.12                                                 |
| Prevotella melaninogenica | VBIPreMel47739_0290  | Phosphoglucomutase EC 5.4.2.2                                                                                      |
| Prevotella melaninogenica | VBIPreMel47739_0841  | Translation elongation factor Tu                                                                                   |
| Prevotella melaninogenica | VBIPreMel53552_2085  | 8-amino-7-oxononanoate synthase EC 2.3.1.47                                                                        |
| Prevotella melaninogenica | VBIPreMel53552_1462  | Heat shock protein 60 family chaperone GroEL                                                                       |
| Prevotella melaninogenica | VBIPreMel53552_0635  | Mannose-6-phosphate isomerase EC 5.3.1.8                                                                           |
| Prevotella micans         | VBIPreMic169270_1030 | Protein export cytoplasm protein SecA ATPase RNA helicase TC 3.A.5.1.1                                             |
| Prevotella micans         | VBIPreMic169270_0691 | Putative coproporphyrinogen III oxidase of BS HemN-type 2C oxygen-independent EC 1.3.99.22 2C in heat shock gene c |
| Prevotella micans         | VBIPreMic169270_1392 | Transcriptional regulatory protein rprY                                                                            |
| Prevotella micans         | VBIPreMic169270_0692 | ABC transporter 2C ATP-binding permease protein                                                                    |
| Prevotella micans         | VBIPreMic169270_0305 | ABC transporter ATP-binding protein                                                                                |
| Prevotella micans         | VBIPreMic169270_0850 | ABC transporter ATP-binding protein                                                                                |
| Prevotella micans         | VBIPreMic169270_1539 | Ferrous iron transport protein B                                                                                   |
| Prevotella micans         | VBIPreMic169270_1452 | Protein export cytoplasm protein SecA ATPase RNA helicase TC 3.A.5.1.1                                             |
| Prevotella nigrescens     | VBIPreNig185369_0348 | RNA polymerase sigma factor RpoD                                                                                   |
| Prevotella oralis         | VBIPreOra166786_1547 | RNA polymerase sigma factor RpoD                                                                                   |
| Prevotella oralis         | VBIPreOra166786_1234 | Translation elongation factor Tu                                                                                   |
|                           |                      | Enolase EC 4.2.1.11                                                                                                |
|                           |                      | 4-keto-6-deoxy-N-Acetyl-D-hexosaminyL-Lipid carrier aminotransferase                                               |
|                           |                      | ABC transporter ATP-binding protein                                                                                |

Table S8

|                               |                      |                                                                                                            |
|-------------------------------|----------------------|------------------------------------------------------------------------------------------------------------|
| Prevotella oralis             | VBIPreOra166786_0895 | ABC transporter ATP-binding protein                                                                        |
| Prevotella oralis             | VBIPreOra166786_2411 | Cell division transporter 2C ATP-binding protein FtsE TC 3.A.5.1.1                                         |
| Prevotella oralis             | VBIPreOra166786_1336 | Enolase EC 4.2.1.11                                                                                        |
| Prevotella oralis             | VBIPreOra166786_0422 | Glutamine synthetase type I EC 6.3.1.2                                                                     |
| Prevotella oralis             | VBIPreOra166786_0260 | Heat shock protein 60 family chaperone GroEL                                                               |
| Prevotella oralis             | VBIPreOra166786_0605 | NAD-dependent glyceraldehyde-3-phosphate dehydrogenase EC 1.2.1.12                                         |
| Prevotella oralis             | VBIPreOra166786_1876 | Translation elongation factor Tu                                                                           |
| Prevotella oris               | VBIPreOri75361_0570  | 2-amino-3-ketobutyrate coenzyme A ligase EC 2.3.1.29                                                       |
| Prevotella oris               | VBIPreOri75361_2029  | 3-oxoacyl-acyl-carrier protein reductase EC 1.1.1.100                                                      |
| Prevotella oris               | VBIPreOri75361_0690  | ABC transporter ATP-binding protein                                                                        |
| Prevotella oris               | VBIPreOri75361_0825  | ABC transporter ATP-binding protein                                                                        |
| Prevotella oris               | VBIPreOri75361_1391  | ATP-dependent Clp protease ATP-binding subunit ClpA                                                        |
| Prevotella oris               | VBIPreOri82342_0112  | ATP-dependent Clp protease ATP-binding subunit ClpA                                                        |
| Prevotella oris               | VBIPreOri82342_1428  | DNA-binding response regulator 2C AraC family                                                              |
| Prevotella oris               | VBIPreOri75361_1171  | Enolase EC 4.2.1.11                                                                                        |
| Prevotella oris               | VBIPreOri75361_2324  | <b>Ferrous iron transport protein B</b>                                                                    |
| Prevotella oris               | VBIPreOri75361_1392  | GTP pyrophosphokinase EC 2.7.6.5 2C pppGpp synthetase I                                                    |
| Prevotella oris               | VBIPreOri75361_1071  | Heat shock protein 60 family chaperone GroEL                                                               |
| Prevotella oris               | VBIPreOri75361_0283  | Heat shock protein 60 family chaperone GroEL                                                               |
| Prevotella oris               | VBIPreOri82342_0428  | <b>Lipid-A-disaccharide synthase EC 2.4.1.182</b>                                                          |
| Prevotella oris               | VBIPreOri82342_0309  | <b>Lipopolysaccharide ABC transporter 2C ATP-binding protein LptB</b>                                      |
| Prevotella oris               | VBIPreOri82342_0125  | Methionine ABC transporter ATP-binding protein                                                             |
| Prevotella oris               | VBIPreOri75361_0939  | NAD-dependent glyceraldehyde-3-phosphate dehydrogenase EC 1.2.1.12                                         |
| Prevotella oris               | VBIPreOri75361_2340  | Phosphomannomutase EC 5.4.2.8 Phosphoglucosamine mutase EC 5.4.2.10                                        |
| Prevotella oris               | VBIPreOri75361_0691  | Phosphomannomutase EC 5.4.2.8 Phosphoglucosamine mutase EC 5.4.2.10                                        |
| Prevotella oris               | VBIPreOri75361_1873  | Protein export cytoplasm protein SecA ATPase RNA helicase TC 3.A.5.1.1                                     |
| Prevotella oris               | VBIPreOri75361_1559  | Protein export cytoplasm protein SecA ATPase RNA helicase TC 3.A.5.1.1                                     |
| Prevotella oris               | VBIPreOri75361_0936  | putative lipopolysaccharide biosynthesis protein                                                           |
| Prevotella oris               | VBIPreOri75361_2674  | RNA polymerase sigma factor RpoD                                                                           |
| Prevotella oris               | VBIPreOri75361_1320  | <b>TonB-dependent receptor</b>                                                                             |
| Prevotella oris               | VBIPreOri75361_0909  | Translation elongation factor Tu                                                                           |
| Prevotella oris               | VBIPreOri75361_0290  | Translation elongation factor Tu                                                                           |
| Prevotella oulorum            | VBIPreOul152235_1074 | 3-oxoacyl-acyl-carrier-protein synthase 2C KASII EC 2.3.1.41                                               |
| Prevotella oulorum            | VBIPreOul152235_0636 | Calcium-transporting ATPase                                                                                |
| Prevotella oulorum            | VBIPreOul152235_2273 | FKBP-type peptidyl-prolyl cis-trans isomerase fKlB EC 5.2.1.8                                              |
| Prevotella oulorum            | VBIPreOul152235_0257 | <b>Lipid A export ATP-binding permease protein MsbA</b>                                                    |
| Prevotella oulorum            | VBIPreOul152235_0736 | streptococcal pyrogenic exotoxin B EC3.4.22.10                                                             |
| Prevotella pallens            | VBIPrePal183129_1477 | FKBP-type peptidyl-prolyl cis-trans isomerase fKlB EC 5.2.1.8                                              |
| Prevotella pallens            | VBIPrePal183129_2562 | Mannose-1-phosphate guanylyltransferase GDP EC 2.7.7.22                                                    |
| Prevotella sp. oral taxon 299 | VBIPreSp104905_0102  | ABC transporter 2C ATP-binding permease protein                                                            |
| Prevotella sp. oral taxon 302 | VBIPreSp140204_0099  | ABC transporter 2C ATP-binding permease protein                                                            |
| Prevotella sp. oral taxon 302 | VBIPreSp140204_2049  | GDP-L-fucose synthetase EC 1.1.1.271                                                                       |
| Prevotella sp. oral taxon 302 | VBIPreSp140204_1827  | GDP-mannose 4 2C6 dehydratase EC 4.2.1.47                                                                  |
| Prevotella sp. oral taxon 302 | VBIPreSp140204_1814  | Glycosyl transferase                                                                                       |
| Prevotella sp. oral taxon 302 | VBIPreSp140204_1826  | Mannose-1-phosphate guanylyltransferase GDP EC 2.7.7.22                                                    |
| Prevotella sp. oral taxon 302 | VBIPreSp140204_0844  | Mannose-6-phosphate isomerase EC 5.3.1.8                                                                   |
| Prevotella sp. oral taxon 302 | VBIPreSp140204_0180  | RNA polymerase sigma factor RpoD                                                                           |
| Prevotella sp. oral taxon 302 | VBIPreSp140204_1203  | Transcriptional regulator                                                                                  |
| Prevotella sp. oral taxon 306 | VBIPreSp216647_2372  | 3-oxoacyl-acyl-carrier protein reductase EC 1.1.1.100                                                      |
| Prevotella sp. oral taxon 306 | VBIPreSp216647_0216  | 4-keto-6-deoxy-N-Acetyl-D-hexosaminyL-Lipid carrier aminotransferase                                       |
| Prevotella sp. oral taxon 306 | VBIPreSp216647_1881  | ABC transporter ATP-binding protein                                                                        |
| Prevotella sp. oral taxon 306 | VBIPreSp216647_1869  | ABC transporter ATP-binding protein                                                                        |
| Prevotella sp. oral taxon 306 | VBIPreSp216647_2092  | ABC transporter ATP-binding protein                                                                        |
| Prevotella sp. oral taxon 306 | VBIPreSp216647_1928  | ABC transporter ATP-binding protein                                                                        |
| Prevotella sp. oral taxon 306 | VBIPreSp216647_1247  | Acyl carrier protein                                                                                       |
| Prevotella sp. oral taxon 306 | VBIPreSp216647_0123  | Alpha-1 2C3-N-acetylgalactosamine transferase PglA EC 2.4.1.-                                              |
| Prevotella sp. oral taxon 306 | VBIPreSp216647_0730  | Aminotransferase                                                                                           |
| Prevotella sp. oral taxon 306 | VBIPreSp216647_0595  | ATP synthase alpha chain EC 3.6.3.14                                                                       |
| Prevotella sp. oral taxon 306 | VBIPreSp216647_2146  | ATP synthase beta chain EC 3.6.3.14                                                                        |
| Prevotella sp. oral taxon 306 | VBIPreSp216647_0613  | ATP synthase beta chain EC 3.6.3.14                                                                        |
| Prevotella sp. oral taxon 306 | VBIPreSp216647_1438  | Capsular polysaccharide biosynthesis protein capD                                                          |
| Prevotella sp. oral taxon 306 | VBIPreSp216647_1071  | Colanic acid biosynthesis glycosyl transferase WcaE                                                        |
| Prevotella sp. oral taxon 306 | VBIPreSp216647_1055  | dTDP-4-dehydrohamnose 3 2C5-epimerase EC 5.1.3.13                                                          |
| Prevotella sp. oral taxon 306 | VBIPreSp216647_0636  | dTDP-glucose 4 2C6-dehydratase EC 4.2.1.46                                                                 |
| Prevotella sp. oral taxon 306 | VBIPreSp216647_1403  | Enolase EC 4.2.1.11                                                                                        |
| Prevotella sp. oral taxon 306 | VBIPreSp216647_1073  | Glucose-1-phosphate thymidyltransferase EC 2.7.7.24                                                        |
| Prevotella sp. oral taxon 306 | VBIPreSp216647_0563  | Heat shock protein 60 family chaperone GroEL                                                               |
| Prevotella sp. oral taxon 306 | VBIPreSp216647_1549  | Heat shock protein 60 family chaperone GroEL                                                               |
| Prevotella sp. oral taxon 306 | VBIPreSp216647_2284  | Heat shock protein 60 family chaperone GroEL                                                               |
| Prevotella sp. oral taxon 306 | VBIPreSp216647_0236  | <b>Hemolysins and related proteins containing CBS domains</b>                                              |
| Prevotella sp. oral taxon 306 | VBIPreSp216647_0434  | N-acetylglucosamine deacetylase EC 3.5.1.- 3R-hydroxymyristoyl-acyl carrier protein dehydratase EC 4.2.1.- |
| Prevotella sp. oral taxon 306 | VBIPreSp216647_0244  | Phosphoribosylaminoimidazole-succinocarboxamide synthase EC 6.3.2.6                                        |
| Prevotella sp. oral taxon 306 | VBIPreSp216647_1299  | Streptococcal cysteine protease Streptopain EC 3.4.22.10 Streptococcal pyrogenic exotoxin B SpeB           |
| Prevotella sp. oral taxon 306 | VBIPreSp216647_2476  | Translation elongation factor Tu                                                                           |
| Prevotella sp. oral taxon 306 | VBIPreSp216647_0330  | <b>UDP-3-O-3-hydroxymyristoyl glucosamine N-acyltransferase EC 2.3.1.-</b>                                 |
| Prevotella sp. oral taxon 306 | VBIPreSp216647_1084  | <b>UDP-N-acetylglucosamine 2-epimerase EC 5.1.3.14</b>                                                     |
| Prevotella sp. oral taxon 306 | VBIPreSp216647_1385  | Undecaprenyl pyrophosphate synthetase EC 2.5.1.31                                                          |
| Prevotella sp. oral taxon 317 | VBIPreSp57183_1605   | ATP-dependent Clp protease ATP-binding subunit ClpA                                                        |
| Prevotella sp. oral taxon 317 | VBIPreSp57183_0981   | Enolase EC 4.2.1.11                                                                                        |

Table S8

|                               |                      |                                                                                                    |
|-------------------------------|----------------------|----------------------------------------------------------------------------------------------------|
| Prevotella sp. oral taxon 317 | VBIPreSp57183_2774   | Heat shock protein 60 family chaperone GroEL                                                       |
| Prevotella sp. oral taxon 317 | VBIPreSp57183_2048   | NAD-dependent glyceraldehyde-3-phosphate dehydrogenase EC 1.2.1.12                                 |
| Prevotella sp. oral taxon 317 | VBIPreSp57183_2031   | Probable polybeta-D-mannuronate O-acetylase EC 2.3.1.-                                             |
| Prevotella tannerae           | VBIPreTan62661_2672  | 3-oxoacyl-acyl-carrier-protein synthase 2C KASII EC 2.3.1.41                                       |
| Prevotella tannerae           | VBIPreTan62661_2993  | ATP synthase alpha chain EC 3.6.3.14                                                               |
| Prevotella tannerae           | VBIPreTan62661_1062  | ATP synthase alpha chain EC 3.6.3.14                                                               |
| Prevotella tannerae           | VBIPreTan62661_3092  | ATP synthase beta chain EC 3.6.3.14                                                                |
| Prevotella tannerae           | VBIPreTan62661_2914  | CipB protein                                                                                       |
| Prevotella tannerae           | VBIPreTan62661_2832  | COG1272 Predicted membrane protein hemolysin III homolog                                           |
| Prevotella tannerae           | VBIPreTan62661_0695  | D-alanine--polyphosphoribitol ligase subunit 1 EC 6.1.1.13                                         |
| Prevotella tannerae           | VBIPreTan62661_0859  | D-alanine--polyphosphoribitol ligase subunit 1 EC 6.1.1.13                                         |
| Prevotella tannerae           | VBIPreTan62661_2887  | dTDP-glucose 4 2C6-dehydratase EC 4.2.1.46                                                         |
| Prevotella tannerae           | VBIPreTan62661_3303  | FIG00939874 hypothetical protein                                                                   |
| Prevotella tannerae           | VBIPreTan62661_0225  | Glucose-1-phosphate thymidyltransferase EC 2.7.7.24                                                |
| Prevotella tannerae           | VBIPreTan62661_1741  | Heat shock protein 60 family chaperone GroEL                                                       |
| Prevotella tannerae           | VBIPreTan62661_0089  | Lipid A export ATP-binding permease protein MsbA                                                   |
| Prevotella tannerae           | VBIPreTan62661_0193  | Lipid A export ATP-binding permease protein MsbA                                                   |
| Prevotella tannerae           | VBIPreTan62661_4294  | NAD-dependent glyceraldehyde-3-phosphate dehydrogenase EC 1.2.1.12                                 |
| Prevotella tannerae           | VBIPreTan62661_1690  | Phosphoglucomutase EC 5.4.2.2                                                                      |
| Prevotella tannerae           | VBIPreTan62661_3176  | RNA polymerase sigma factor RpoD                                                                   |
| Prevotella tannerae           | VBIPreTan62661_2028  | Superoxide dismutase Fe EC 1.15.1.1                                                                |
| Prevotella tannerae           | VBIPreTan62661_3769  | tetracycline resistance element regulator RteB - Bacteroides thetaiotaomicron                      |
| Prevotella tannerae           | VBIPreTan62661_2542  | Translation elongation factor Tu                                                                   |
| Prevotella tannerae           | VBIPreTan62661_1339  | UDP-3-O-3-hydroxymyristoyl glucosamine N-acyltransferase EC 2.3.1.-                                |
| Prevotella veroralis          | VBIPreVer83495_1492  | 3-oxoacyl-acyl-carrier-protein synthase 2C KASII EC 2.3.1.41                                       |
| Prevotella veroralis          | VBIPreVer83495_0434  | 3-oxoacyl-acyl-carrier-protein synthase 2C KASII EC 2.3.1.41                                       |
| Prevotella veroralis          | VBIPreVer83495_1079  | 8-amino-7-oxononanoate synthase EC 2.3.1.47                                                        |
| Prevotella veroralis          | VBIPreVer83495_1528  | ABC transporter 2C ATP-binding permease protein                                                    |
| Prevotella veroralis          | VBIPreVer83495_0175  | ABC transporter 2C ATP-binding permease protein                                                    |
| Prevotella veroralis          | VBIPreVer83495_0135  | ABC transporter 2C ATP-binding permease protein                                                    |
| Prevotella veroralis          | VBIPreVer83495_1520  | ABC transporter ATP-binding protein                                                                |
| Prevotella veroralis          | VBIPreVer83495_1311  | ABC transporter ATP-binding protein                                                                |
| Prevotella veroralis          | VBIPreVer83495_0908  | ABC transporter ATP-binding protein                                                                |
| Prevotella veroralis          | VBIPreVer83495_0527  | Acyl carrier protein                                                                               |
| Prevotella veroralis          | VBIPreVer83495_2173  | Alkyl hydroperoxide reductase protein C EC 1.6.4.-                                                 |
| Prevotella veroralis          | VBIPreVer83495_1357  | ATP synthase alpha chain EC 3.6.3.14                                                               |
| Prevotella veroralis          | VBIPreVer83495_0906  | ATP synthase beta chain EC 3.6.3.14                                                                |
| Prevotella veroralis          | VBIPreVer83495_0002  | Capsular polysaccharide biosynthesis protein capD                                                  |
| Prevotella veroralis          | VBIPreVer83495_1264  | Enolase EC 4.2.1.11                                                                                |
| Prevotella veroralis          | VBIPreVer83495_0537  | FIG00937278 hypothetical protein                                                                   |
| Prevotella veroralis          | VBIPreVer83495_1148  | Glucose-1-phosphate thymidyltransferase EC 2.7.7.24                                                |
| Prevotella veroralis          | VBIPreVer83495_0671  | GTP pyrophosphokinase EC 2.7.6.5 2C pppGpp synthetase I                                            |
| Prevotella veroralis          | VBIPreVer83495_1206  | Heat shock protein 60 family chaperone GroEL                                                       |
| Prevotella veroralis          | VBIPreVer83495_2316  | Heat shock protein 60 family chaperone GroEL                                                       |
| Prevotella veroralis          | VBIPreVer83495_1353  | Hypothetical radical SAM family enzyme 2C NOT coproporphyrinogen III oxidase 2C oxygen-independent |
| Prevotella veroralis          | VBIPreVer83495_1453  | Lipid A export ATP-binding permease protein MsbA                                                   |
| Prevotella veroralis          | VBIPreVer83495_1280  | Mannose-6-phosphate isomerase EC 5.3.1.8                                                           |
| Prevotella veroralis          | VBIPreVer83495_2353  | NAD-dependent glyceraldehyde-3-phosphate dehydrogenase EC 1.2.1.12                                 |
| Prevotella veroralis          | VBIPreVer83495_1507  | NAD-dependent glyceraldehyde-3-phosphate dehydrogenase EC 1.2.1.12                                 |
| Prevotella veroralis          | VBIPreVer83495_0876  | NAD-dependent glyceraldehyde-3-phosphate dehydrogenase EC 1.2.1.12                                 |
| Prevotella veroralis          | VBIPreVer83495_0688  | Phosphoglucomutase EC 5.4.2.2                                                                      |
| Prevotella veroralis          | VBIPreVer83495_1241  | Probable polybeta-D-mannuronate O-acetylase EC 2.3.1.-                                             |
| Prevotella veroralis          | VBIPreVer83495_0738  | Protein export cytoplasm protein SecA ATPase RNA helicase TC 3.A.5.1.1                             |
| Prevotella veroralis          | VBIPreVer83495_0718  | Protein export cytoplasm protein SecA ATPase RNA helicase TC 3.A.5.1.1                             |
| Prevotella veroralis          | VBIPreVer83495_0672  | putative polysialic acid transport protein                                                         |
| Prevotella veroralis          | VBIPreVer83495_0685  | RNA polymerase sigma factor RpoD                                                                   |
| Prevotella veroralis          | VBIPreVer83495_2190  | RNA polymerase sigma factor RpoD                                                                   |
| Prevotella veroralis          | VBIPreVer83495_1347  | Superoxide dismutase Fe EC 1.15.1.1                                                                |
| Prevotella veroralis          | VBIPreVer83495_0689  | thiol protease hemagglutinin PrtT precursor 2C putative                                            |
| Prevotella veroralis          | VBIPreVer83495_0355  | TonB-dependent receptor                                                                            |
| Prevotella veroralis          | VBIPreVer83495_0103  | Transcriptional regulatory protein rprY                                                            |
| Prevotella veroralis          | VBIPreVer83495_1879  | Transcriptional regulatory protein rprY                                                            |
| Prevotella veroralis          | VBIPreVer83495_0818  | Translation elongation factor Tu                                                                   |
| Prevotella veroralis          | VBIPreVer83495_0091  | Two-component system sensor histidine kinase                                                       |
| Propionibacterium acnes       | VBIProAcn138375_0754 | Tyrosine-protein kinase Wzc EC 2.7.10.2                                                            |
| Propionibacterium acnes       | VBIProAcn10541_0727  | ABC transporter ATP-binding protein                                                                |
| Propionibacterium avidum      | VBIProAvi182898_0456 | GTP pyrophosphokinase EC 2.7.6.5 2C pppGpp synthetase I                                            |
| Propionibacterium avidum      | VBIProAvi182898_1322 | 3-oxoacyl-acyl-carrier-protein synthase 2C KASII EC 2.3.1.41                                       |
| Propionibacterium avidum      | VBIProAvi182898_1763 | ABC transporter 2C ATP-binding protein                                                             |
| Propionibacterium avidum      | VBIProAvi182898_2001 | Acyl-acyl-carrier-protein--UDP-N- acetylglucosamine O-acyltransferase EC 2.3.1.129                 |
| Propionibacterium avidum      | VBIProAvi182898_1680 | Transcriptional regulatory protein rprY                                                            |
| Propionibacterium propionicum | VBIProPro161471_1001 | Undecaprenyl pyrophosphate synthetase EC 2.5.1.31                                                  |
| Propionibacterium propionicum | VBIProPro161471_0042 | Glutamine synthetase type I EC 6.3.1.2                                                             |
| Proteus mirabilis             | VBIProMir120933_3122 | Transcriptional regulator                                                                          |
| Proteus mirabilis             | VBIProMir120933_0269 | 8-amino-7-oxononanoate synthase EC 2.3.1.47                                                        |
| Proteus mirabilis             | VBIProMir120933_1017 | ABC transporter 2C ATP-binding permease protein                                                    |
| Proteus mirabilis             | VBIProMir92659_3193  | ABC transporter 2C ATP-binding permease protein                                                    |
| Proteus mirabilis             | VBIProMir92659_2202  | ABC transporter ATP-binding protein                                                                |
| Proteus mirabilis             | VBIProMir92659_3013  | Adenylate cyclase EC 4.6.1.1                                                                       |
|                               |                      | ATP synthase beta chain EC 3.6.3.14                                                                |

Table S8

|                                |                      |                                                                                                                 |
|--------------------------------|----------------------|-----------------------------------------------------------------------------------------------------------------|
| Proteus mirabilis              | VBIProMir92659_0964  | ATP synthase beta chain EC 3.6.3.14                                                                             |
| Proteus mirabilis              | VBIProMir92659_0356  | Capsular polysaccharide biosynthesis protein capD                                                               |
| Proteus mirabilis              | VBIProMir92659_1614  | ClpB protein                                                                                                    |
| Proteus mirabilis              | VBIProMir120933_1582 | Enolase EC 4.2.1.11                                                                                             |
| Proteus mirabilis              | VBIProMir120933_1581 | Ferrous iron transport protein B                                                                                |
| Proteus mirabilis              | VBIProMir92659_2203  | Ferrous iron transport protein B                                                                                |
| Proteus mirabilis              | VBIProMir92659_0588  | FKBP-type peptidyl-prolyl cis-trans isomerase fklB EC 5.2.1.8                                                   |
| Proteus mirabilis              | VBIProMir92659_1246  | GDP-L-fucose synthetase EC 1.1.1.271                                                                            |
| Proteus mirabilis              | VBIProMir92659_3158  | Glutamine amidotransferase 2C class I                                                                           |
| Proteus mirabilis              | VBIProMir120933_2227 | Hemolysins and related proteins containing CBS domains                                                          |
| Proteus mirabilis              | VBIProMir92659_0722  | Hyaluronidase                                                                                                   |
| Proteus mirabilis              | VBIProMir92659_2531  | hypothetical protein                                                                                            |
| Proteus mirabilis              | VBIProMir120933_2485 | Malonyl CoA-acyl carrier protein transacylase EC 2.3.1.39                                                       |
| Proteus mirabilis              | VBIProMir92659_1222  | mannosyltransferase                                                                                             |
| Proteus mirabilis              | VBIProMir92659_1738  | Protein export cytoplasm protein SecA ATPase RNA helicase TC 3.A.5.1.1                                          |
| Proteus mirabilis              | VBIProMir92659_3009  | Protein export cytoplasm protein SecA ATPase RNA helicase TC 3.A.5.1.1                                          |
| Proteus mirabilis              | VBIProMir92659_1822  | Protein export cytoplasm protein SecA ATPase RNA helicase TC 3.A.5.1.1                                          |
| Proteus mirabilis              | VBIProMir92659_2934  | Protein export cytoplasm protein SecA ATPase RNA helicase TC 3.A.5.1.1                                          |
| Proteus mirabilis              | VBIProMir92659_2040  | TonB-dependent receptor                                                                                         |
| Proteus mirabilis              | VBIProMir92659_2469  | TonB-dependent siderophore receptor                                                                             |
| Proteus mirabilis              | VBIProMir92659_1536  | UDP-3-O-3-hydroxymyristoyl glucosamine N-acyltransferase EC 2.3.1.-                                             |
| Proteus mirabilis              | VBIProMir120933_0087 | UDP-glucose dehydrogenase EC 1.1.1.22                                                                           |
| Proteus mirabilis              | VBIProMir92659_1710  | UDP-N-acetylglucosamine 2-epimerase EC 5.1.3.14                                                                 |
| Pseudomonas aeruginosa         | VBIPseAer80442_5851  | ABC transporter related                                                                                         |
| Pseudomonas aeruginosa         | VBIPseAer79785_4683  | ATP-dependent Clp protease ATP-binding subunit ClpA                                                             |
| Pseudomonas aeruginosa         | VBIPseAer79785_5810  | ClpB protein                                                                                                    |
| Pseudomonas aeruginosa         | VBIPseAer113719_5037 | ClpB protein                                                                                                    |
| Pseudomonas aeruginosa         | VBIPseAer80442_1590  | Enolase EC 4.2.1.11                                                                                             |
| Pseudomonas aeruginosa         | VBIPseAer80442_1190  | GTP pyrophosphokinase EC 2.7.6.5 2C pppGpp synthetase II Guanosine-3' 2C5'-bisdiphosphate 3'-pyrophosphohydrola |
| Pseudomonas aeruginosa         | VBIPseAer80442_0363  | Hyaluronidase                                                                                                   |
| Pseudomonas aeruginosa         | VBIPseAer113719_4360 | Hyaluronidase                                                                                                   |
| Pseudomonas aeruginosa         | VBIPseAer113719_5040 | hypothetical protein                                                                                            |
| Pseudomonas aeruginosa         | VBIPseAer113719_0306 | Lipid A export ATP-binding permease protein MsbA                                                                |
| Pseudomonas aeruginosa         | VBIPseAer113719_1562 | Lipid A export ATP-binding permease protein MsbA                                                                |
| Pseudomonas aeruginosa         | VBIPseAer80442_1357  | Protein export cytoplasm protein SecA ATPase RNA helicase TC 3.A.5.1.1                                          |
| Pseudomonas aeruginosa         | VBIPseAer80442_1313  | Protein export cytoplasm protein SecA ATPase RNA helicase TC 3.A.5.1.1                                          |
| Pseudomonas aeruginosa         | VBIPseAer79785_4768  | Translation elongation factor Tu                                                                                |
| Pseudomonas aeruginosa         | VBIPseAer80442_5546  | UDP-glucose dehydrogenase EC 1.1.1.22                                                                           |
| Pseudomonas fluorescens        | VBIPseFlu72549_3701  | 3-oxoacyl-acyl-carrier protein reductase EC 1.1.1.100                                                           |
| Pseudomonas fluorescens        | VBIPseFlu98510_1055  | Calcium-transporting ATPase                                                                                     |
| Pseudomonas fluorescens        | VBIPseFlu98510_5390  | Capsular polysaccharide biosynthesis protein capD                                                               |
| Pseudomonas fluorescens        | VBIPseFlu72549_3244  | dTDP-glucose 4 2C6-dehydratase EC 4.2.1.46                                                                      |
| Pseudomonas fluorescens        | VBIPseFlu72549_4993  | GDP-L-fucose synthetase EC 1.1.1.271                                                                            |
| Pseudomonas fluorescens        | VBIPseFlu44242_0341  | Glutamine amidotransferase 2C class I                                                                           |
| Pseudomonas fluorescens        | VBIPseFlu98510_1369  | Glutamine synthetase type I EC 6.3.1.2                                                                          |
| Pseudomonas fluorescens        | VBIPseFlu72549_6211  | GTP pyrophosphokinase EC 2.7.6.5 2C pppGpp synthetase II Guanosine-3' 2C5'-bisdiphosphate 3'-pyrophosphohydrola |
| Pseudomonas fluorescens        | VBIPseFlu44242_4055  | HtrA protease chaperone protein                                                                                 |
| Pseudomonas fluorescens        | VBIPseFlu44242_1548  | Lipid A export ATP-binding permease protein MsbA                                                                |
| Pseudomonas fluorescens        | VBIPseFlu44242_0490  | Lipid A export ATP-binding permease protein MsbA                                                                |
| Pseudomonas fluorescens        | VBIPseFlu44242_5098  | Lipopolysaccharide ABC transporter 2C ATP-binding protein LptB                                                  |
| Pseudomonas fluorescens        | VBIPseFlu44242_5111  | Mannose-1-phosphate guanylyltransferase GDP EC 2.7.7.22                                                         |
| Pseudomonas fluorescens        | VBIPseFlu98510_4033  | RNA polymerase sigma factor RpoD                                                                                |
| Pseudomonas fluorescens        | VBIPseFlu98510_4864  | Serine protease                                                                                                 |
| Pseudomonas fluorescens        | VBIPseFlu98510_2392  | Transcriptional regulator                                                                                       |
| Pseudomonas pseudoalcaligenes  | VBIPsePse236901_5643 | Acyl-acyl-carrier-protein--UDP-N- acetylglucosamine O-acyltransferase EC 2.3.1.129                              |
| Pseudomonas pseudoalcaligenes  | VBIPsePse236901_2436 | ATP synthase alpha chain EC 3.6.3.14                                                                            |
| Pseudomonas pseudoalcaligenes  | VBIPsePse236901_5464 | Diaminopimelate decarboxylase EC 4.1.1.20                                                                       |
| Pseudomonas pseudoalcaligenes  | VBIPsePse236901_4123 | Enolase EC 4.2.1.11                                                                                             |
| Pseudomonas pseudoalcaligenes  | VBIPsePse236901_0399 | Glucose-1-phosphate thymidyltransferase EC 2.7.7.24                                                             |
| Pseudomonas pseudoalcaligenes  | VBIPsePse236901_3260 | RNA polymerase sigma factor RpoD                                                                                |
| Pseudomonas pseudoalcaligenes  | VBIPsePse236901_0226 | Tyrosine-protein kinase Wzc EC 2.7.10.2                                                                         |
| Pseudomonas pseudoalcaligenes  | VBIPsePse236901_6292 | UDP-3-O-3-hydroxymyristoyl glucosamine N-acyltransferase EC 2.3.1.-                                             |
| Pseudomonas stutzeri           | VBIPseStu31643_1050  | 3-oxoacyl-acyl-carrier-protein synthase 2C KASII EC 2.3.1.41                                                    |
| Pseudomonas stutzeri           | VBIPseStu31643_0758  | DNA-binding response regulator 2C AraC family                                                                   |
| Pseudomonas stutzeri           | VBIPseStu31643_0770  | FKBP-type peptidyl-prolyl cis-trans isomerase fklB EC 5.2.1.8                                                   |
| Pseudomonas stutzeri           | VBIPseStu31643_3618  | Phosphoribosylaminoimidazole-succinocarboxamide synthase EC 6.3.2.6                                             |
| Pseudomonas stutzeri           | VBIPseStu31643_2673  | UDP-glucose 4-epimerase EC 5.1.3.2                                                                              |
| Pseudomonas stutzeri           | VBIPseStu31643_1931  | Undecaprenyl pyrophosphate synthetase EC 2.5.1.31                                                               |
| Pseudoramibacter alactolyticus | VBIPseAla174371_0933 | GTP pyrophosphokinase EC 2.7.6.5 2C pppGpp synthetase I                                                         |
| Pseudoramibacter alactolyticus | VBIPseAla174371_1683 | Phosphoglucomutase EC 5.4.2.2                                                                                   |
| Pyramidobacter piscolens       | VBIPyrPis26956_1263  | 4-keto-6-deoxy-N-Acetyl-D-hexosaminy-Lipid carrier aminotransferase                                             |
| Pyramidobacter piscolens       | VBIPyrPis26956_0014  | ATP-dependent Clp protease ATP-binding subunit ClpA                                                             |
| Pyramidobacter piscolens       | VBIPyrPis26956_1285  | Ferrous iron transport protein B                                                                                |
| Pyramidobacter piscolens       | VBIPyrPis26956_0944  | Heat shock protein 60 family chaperone GroEL                                                                    |
| Pyramidobacter piscolens       | VBIPyrPis26956_0880  | Hemolysins and related proteins containing CBS domains                                                          |
| Pyramidobacter piscolens       | VBIPyrPis26956_1046  | NAD-dependent glyceraldehyde-3-phosphate dehydrogenase EC 1.2.1.12                                              |
| Pyramidobacter piscolens       | VBIPyrPis26956_0145  | Pantoate--beta-alanine ligase EC 6.3.2.1                                                                        |
| Pyramidobacter piscolens       | VBIPyrPis26956_1980  | putative capsular polysaccharide biosynthesis glycosyltransferase                                               |
| Pyramidobacter piscolens       | VBIPyrPis26956_0466  | Transcriptional regulatory protein rprY                                                                         |

Table S8

|                          |                      |                                                                                                            |
|--------------------------|----------------------|------------------------------------------------------------------------------------------------------------|
| Pyramidobacter piscicola | VBIPyrPis26956_1880  | Undecaprenyl-phosphate N-acetylglucosaminyl 1-phosphate transferase EC 2.7.8.-                             |
| Ralstonia pickettii      | VBIRalPic57998_0080  | Mannose-1-phosphate guanylyltransferase GDP EC 2.7.7.22                                                    |
| Rhodobacter capsulatus   | VBIRhoCap134200_1049 | Alkyl hydroperoxide reductase protein C EC 1.6.4.-                                                         |
| Rhodobacter capsulatus   | VBIRhoCap134200_3014 | ATP synthase alpha chain EC 3.6.3.14                                                                       |
| Rhodobacter capsulatus   | VBIRhoCap134200_2826 | Glutamine synthetase type I EC 6.3.1.2                                                                     |
| Rhodobacter capsulatus   | VBIRhoCap134200_3684 | Oligopeptide transport ATP-binding protein OppD TC 3.A.1.5.1                                               |
| Rothia aeria             | VBIRotAer232443_2188 | 3-methylmercaptopyruvate-CoA ligase DmdB                                                                   |
| Rothia aeria             | VBIRotAer232443_0236 | 3-oxoacyl-acyl-carrier-protein synthase 2C KASI EC 2.3.1.41                                                |
| Rothia aeria             | VBIRotAer232443_1044 | ABC transport ATP-binding subunit                                                                          |
| Rothia aeria             | VBIRotAer232443_0680 | ABC transporter 2C transmembrane region ABC transporter Peptidase C39 2C bacteriocin processing            |
| Rothia aeria             | VBIRotAer232443_1467 | ABC transporter related protein                                                                            |
| Rothia aeria             | VBIRotAer232443_1718 | Acetoacetyl-CoA synthetase EC 6.2.1.16 Long-chain-fatty-acid--CoA ligase EC 6.2.1.3                        |
| Rothia aeria             | VBIRotAer232443_2001 | Adenosylmethionine-8-amino-7-oxononanoate aminotransferase EC 2.6.1.62                                     |
| Rothia aeria             | VBIRotAer232443_1499 | ADP-heptose synthase EC 2.7.-.- D-glycero-beta-D-manno-heptose 7-phosphate kinase                          |
| Rothia aeria             | VBIRotAer232443_0205 | Alcohol dehydrogenase EC 1.1.1.1 3B Acetaldehyde dehydrogenase EC 1.2.1.10                                 |
| Rothia aeria             | VBIRotAer232443_1632 | Alkanesulfonates ABC transporter ATP-binding protein Sulfonate ABC transporter 2C ATP-binding subunit SsuB |
| Rothia aeria             | VBIRotAer232443_1889 | Arabinose 5-phosphate isomerase EC 5.3.1.13                                                                |
| Rothia aeria             | VBIRotAer232443_0030 | ATP synthase alpha chain EC 3.6.3.14                                                                       |
| Rothia aeria             | VBIRotAer232443_0791 | ATP synthase beta chain EC 3.6.3.14                                                                        |
| Rothia aeria             | VBIRotAer232443_0012 | ATP-dependent Clp protease 2C ATP-binding subunit ClpC Negative regulator of genetic competence clcC mecB  |
| Rothia aeria             | VBIRotAer232443_0967 | CFA I fimbrial minor adhesin                                                                               |
| Rothia aeria             | VBIRotAer232443_0230 | Chemotaxis response regulator protein-glutamate methyltransferase CheB EC 3.1.1.61                         |
| Rothia aeria             | VBIRotAer232443_0596 | ClpB protein                                                                                               |
| Rothia aeria             | VBIRotAer232443_2198 | ClpB protein                                                                                               |
| Rothia aeria             | VBIRotAer232443_1683 | Dipeptide transport ATP-binding protein DppF TC 3.A.1.5.2                                                  |
| Rothia aeria             | VBIRotAer232443_1466 | Enolase EC 4.2.1.11                                                                                        |
| Rothia aeria             | VBIRotAer232443_2050 | FIG00959769 hypothetical protein                                                                           |
| Rothia aeria             | VBIRotAer232443_0082 | Flagellar assembly protein FliH                                                                            |
| Rothia aeria             | VBIRotAer232443_1725 | Flagellar hook protein FlgE                                                                                |
| Rothia aeria             | VBIRotAer232443_2115 | Flagellar hook-associated protein FlgK                                                                     |
| Rothia aeria             | VBIRotAer232443_0080 | Flagellar motor switch protein FlIG                                                                        |
| Rothia aeria             | VBIRotAer232443_1099 | Flagellin protein FlaB                                                                                     |
| Rothia aeria             | VBIRotAer232443_1379 | General secretion pathway protein F Type II secretory pathway 2C component PulF                            |
| Rothia aeria             | VBIRotAer232443_1573 | Glucose-1-phosphate thymidyltransferase EC 2.7.7.24                                                        |
| Rothia aeria             | VBIRotAer232443_2117 | Glutamate Aspartate transport ATP-binding protein GltL TC 3.A.1.3.4                                        |
| Rothia aeria             | VBIRotAer232443_0203 | Glycosyl transferase family protein                                                                        |
| Rothia aeria             | VBIRotAer232443_0825 | Glycosyltransferase EC 2.4.1.-                                                                             |
| Rothia aeria             | VBIRotAer232443_2197 | GTP pyrophosphokinase EC 2.7.6.5 2C pppGpp synthetase I                                                    |
| Rothia aeria             | VBIRotAer232443_0040 | GTP pyrophosphokinase EC 2.7.6.5 2C pppGpp synthetase I                                                    |
| Rothia aeria             | VBIRotAer232443_0182 | Heat shock protein 60 family chaperone GroEL                                                               |
| Rothia aeria             | VBIRotAer232443_1163 | Heat shock protein 60 family chaperone GroEL                                                               |
| Rothia aeria             | VBIRotAer232443_1378 | Hemolysins and related proteins containing CBS domains                                                     |
| Rothia aeria             | VBIRotAer232443_0706 | Hexose phosphate uptake regulatory protein UhpC                                                            |
| Rothia aeria             | VBIRotAer232443_1411 | Histidine ABC transporter 2C ATP-binding protein TC 3.A.1                                                  |
| Rothia aeria             | VBIRotAer232443_0058 | Lipoate-protein ligase A                                                                                   |
| Rothia aeria             | VBIRotAer232443_0524 | Lipoate-protein ligase A                                                                                   |
| Rothia aeria             | VBIRotAer232443_1357 | Long-chain-fatty-acid--CoA ligase EC 6.2.1.3                                                               |
| Rothia aeria             | VBIRotAer232443_0041 | Magnesium and cobalt efflux protein CorC                                                                   |
| Rothia aeria             | VBIRotAer232443_1060 | Malonyl CoA-acyl carrier protein transacylase EC 2.3.1.39                                                  |
| Rothia aeria             | VBIRotAer232443_0337 | Manganese ABC transporter 2C periplasmic-binding protein SitA                                              |
| Rothia aeria             | VBIRotAer232443_1174 | Manganese superoxide dismutase EC 1.15.1.1                                                                 |
| Rothia aeria             | VBIRotAer232443_0940 | Manganese superoxide dismutase EC 1.15.1.1                                                                 |
| Rothia aeria             | VBIRotAer232443_0789 | Membrane-associated zinc metalloprotease                                                                   |
| Rothia aeria             | VBIRotAer232443_1717 | Mg <sup>2+</sup> transport ATPase 2C P-type EC 3.6.3.2                                                     |
| Rothia aeria             | VBIRotAer232443_1551 | N-Acetylneuraminic acid cytidyltransferase EC 2.7.7.43                                                     |
| Rothia aeria             | VBIRotAer232443_1397 | N-butyryl-L-homoserine lactone quorum-sensing transcriptional activator Transcriptional regulator RhlR     |
| Rothia aeria             | VBIRotAer232443_1495 | Nitrogen regulation protein NtrC                                                                           |
| Rothia aeria             | VBIRotAer232443_2201 | Oligopeptide transport ATP-binding protein OppD TC 3.A.1.5.1                                               |
| Rothia aeria             | VBIRotAer232443_2202 | Oligopeptide transport ATP-binding protein OppD TC 3.A.1.5.1                                               |
| Rothia aeria             | VBIRotAer232443_1310 | Omega-amino acid--pyruvate aminotransferase EC 2.6.1.18                                                    |
| Rothia aeria             | VBIRotAer232443_1088 | Omega-amino acid--pyruvate aminotransferase EC 2.6.1.18                                                    |
| Rothia aeria             | VBIRotAer232443_0788 | Outer membrane protein assembly factor YaeT precursor                                                      |
| Rothia aeria             | VBIRotAer232443_1656 | Outer membrane receptor proteins 2C mostly Fe transport                                                    |
| Rothia aeria             | VBIRotAer232443_1226 | Phosphate transport ATP-binding protein PstB TC 3.A.1.7.1                                                  |
| Rothia aeria             | VBIRotAer232443_1463 | Phosphate transport ATP-binding protein PstB TC 3.A.1.7.1                                                  |
| Rothia aeria             | VBIRotAer232443_1752 | Phosphoglucosamine mutase EC 5.4.2.10                                                                      |
| Rothia aeria             | VBIRotAer232443_1907 | Predicted secretion system X protein GspE-like                                                             |
| Rothia aeria             | VBIRotAer232443_0302 | Protein export cytoplasm protein SecA ATPase RNA helicase TC 3.A.5.1.1                                     |
| Rothia aeria             | VBIRotAer232443_0871 | Putative N-acetylgalactosaminyl-diphosphoundecaprenol glucuronosyltransferase                              |
| Rothia aeria             | VBIRotAer232443_0045 | Ribose operon repressor                                                                                    |
| Rothia aeria             | VBIRotAer232443_0046 | Secreted alkaline metalloproteinase EC 3.4.24.- 2C PrtA B C G homolog                                      |
| Rothia aeria             | VBIRotAer232443_0693 | Secreted alkaline metalloproteinase EC 3.4.24.- 2C PrtA B C G homolog                                      |
| Rothia aeria             | VBIRotAer232443_1096 | Sodium-type flagellar protein motY precursor                                                               |
| Rothia aeria             | VBIRotAer232443_1631 | Translation elongation factor Tu                                                                           |
| Rothia aeria             | VBIRotAer232443_2146 | Translation elongation factor Tu                                                                           |
| Rothia aeria             | VBIRotAer232443_1597 | Translation elongation factor Tu                                                                           |
| Rothia aeria             | VBIRotAer232443_2136 | Translation elongation factor Tu                                                                           |
| Rothia aeria             | VBIRotAer232443_0790 | Transposase ERLG 01310                                                                                     |
| Rothia aeria             | VBIRotAer232443_1685 | Two component 2C Sigma-54 Specific 2C central transcriptional regulator of acidic amino acid uptake        |

Table S8

|                     |                      |                                                                                                           |
|---------------------|----------------------|-----------------------------------------------------------------------------------------------------------|
| Rothia aeria        | VBIRotAer232443_1679 | Two component 2C Sigma-54 Specific 2C central transcriptional regulator of acidic amino acid uptake       |
| Rothia aeria        | VBIRotAer232443_2184 | Type IV fimbrial assembly 2C ATPase PilB                                                                  |
| Rothia aeria        | VBIRotAer232443_1145 | Type IV fimbrial assembly protein PilC                                                                    |
| Rothia aeria        | VBIRotAer232443_1108 | Type IV pilin PilA                                                                                        |
| Rothia aeria        | VBIRotAer232443_1680 | Type VI secretion lipoprotein VasD                                                                        |
| Rothia aeria        | VBIRotAer232443_0792 | UDP-N-acetylglucosamine 2-epimerase EC 5.1.3.14                                                           |
| Rothia aeria        | VBIRotAer232443_1862 | Uncharacterized protein ImpB                                                                              |
| Rothia aeria        | VBIRotAer232443_0591 | Uncharacterized protein ImpJ VasE                                                                         |
| Rothia aeria        | VBIRotAer232443_0087 | Undecaprenyl pyrophosphate synthetase EC 2.5.1.31                                                         |
| Rothia aeria        | VBIRotAer232443_1926 | Urea carboxylase-related ABC transporter 2C ATPase protein                                                |
| Rothia aeria        | VBIRotAer232443_0768 | Urease alpha subunit EC 3.5.1.5                                                                           |
| Rothia dentocariosa | VBIRotDen115472_0490 | 2 2C3-dihydro-2 2C3-dihydroxybenzoate dehydrogenase EC 1.3.1.28 of siderophore biosynthesis               |
| Rothia dentocariosa | VBIRotDen160907_0577 | 2 2C3-dihydro-2 2C3-dihydroxybenzoate dehydrogenase EC 1.3.1.28 of siderophore biosynthesis               |
| Rothia dentocariosa | VBIRotDen115472_2058 | 2 2C3-dihydroxybenzoate-AMP ligase EC 2.7.7.58                                                            |
| Rothia dentocariosa | VBIRotDen160907_0925 | 2 2C3-dihydroxybenzoate-AMP ligase EC 2.7.7.58                                                            |
| Rothia dentocariosa | VBIRotDen160907_0304 | 2-keto-3-deoxy-D-arabino-heptulosonate-7- phosphate synthase II EC 2.5.1.54                               |
| Rothia dentocariosa | VBIRotDen115472_1161 | 3-isopropylmalate dehydratase small subunit EC 4.2.1.33                                                   |
| Rothia dentocariosa | VBIRotDen160907_0924 | 3-isopropylmalate dehydratase small subunit EC 4.2.1.33                                                   |
| Rothia dentocariosa | VBIRotDen160907_0690 | 3-oxoacyl-acyl-carrier protein reductase EC 1.1.1.100                                                     |
| Rothia dentocariosa | VBIRotDen115472_0666 | 3-oxoacyl-acyl-carrier protein reductase EC 1.1.1.100                                                     |
| Rothia dentocariosa | VBIRotDen160907_0405 | 3-oxoacyl-acyl-carrier-protein synthase 2C KASII EC 2.3.1.41                                              |
| Rothia dentocariosa | VBIRotDen160907_0218 | ABC transporter                                                                                           |
| Rothia dentocariosa | VBIRotDen160907_0972 | ABC transporter                                                                                           |
| Rothia dentocariosa | VBIRotDen160907_1151 | ABC transporter                                                                                           |
| Rothia dentocariosa | VBIRotDen160907_0597 | ABC transporter 2C ATP-binding protein                                                                    |
| Rothia dentocariosa | VBIRotDen115472_0694 | ABC transporter 2C ATP-binding protein                                                                    |
| Rothia dentocariosa | VBIRotDen115472_1537 | ABC transporter ATP-binding protein                                                                       |
| Rothia dentocariosa | VBIRotDen115472_1244 | ABC transporter ATPase component                                                                          |
| Rothia dentocariosa | VBIRotDen160907_1787 | ABC transporter ATPase component                                                                          |
| Rothia dentocariosa | VBIRotDen115472_0452 | ABC transporter related                                                                                   |
| Rothia dentocariosa | VBIRotDen115472_0127 | ABC transporter related                                                                                   |
| Rothia dentocariosa | VBIRotDen160907_1917 | ABC transporter related                                                                                   |
| Rothia dentocariosa | VBIRotDen115472_1056 | ABC transporter related                                                                                   |
| Rothia dentocariosa | VBIRotDen160907_1403 | ABC transporter related                                                                                   |
| Rothia dentocariosa | VBIRotDen160907_0977 | ABC-type Fe3+-siderophore transport system 2C permease component                                          |
| Rothia dentocariosa | VBIRotDen115472_2026 | ABC-type Fe3+-siderophore transport system 2C permease component                                          |
| Rothia dentocariosa | VBIRotDen160907_0476 | ABC-type multidrug transport system 2C ATPase component                                                   |
| Rothia dentocariosa | VBIRotDen115472_0625 | ABC-type multidrug transport system 2C ATPase component                                                   |
| Rothia dentocariosa | VBIRotDen160907_0001 | ABC-type multidrug transport system 2C ATPase component                                                   |
| Rothia dentocariosa | VBIRotDen160907_0052 | acyltransferase 3                                                                                         |
| Rothia dentocariosa | VBIRotDen115472_0099 | Alkyl hydroperoxide reductase protein C EC 1.6.4.-                                                        |
| Rothia dentocariosa | VBIRotDen115472_0744 | Anthranilate phosphoribosyltransferase EC 2.4.2.18                                                        |
| Rothia dentocariosa | VBIRotDen160907_1333 | Aspartate racemase EC 5.1.1.13                                                                            |
| Rothia dentocariosa | VBIRotDen115472_2124 | Aspartate racemase EC 5.1.1.13                                                                            |
| Rothia dentocariosa | VBIRotDen160907_0339 | ATP synthase alpha chain EC 3.6.3.14                                                                      |
| Rothia dentocariosa | VBIRotDen115472_0290 | ATP synthase alpha chain EC 3.6.3.14                                                                      |
| Rothia dentocariosa | VBIRotDen160907_0749 | ATP-dependent Clp protease 2C ATP-binding subunit ClpC Negative regulator of genetic competence clcC mecB |
| Rothia dentocariosa | VBIRotDen115472_1902 | ATP-dependent Clp protease 2C ATP-binding subunit ClpC Negative regulator of genetic competence clcC mecB |
| Rothia dentocariosa | VBIRotDen115472_0236 | ATPase component NikO of energizing module of nickel ECF transporter                                      |
| Rothia dentocariosa | VBIRotDen160907_0686 | Branched-chain alpha-keto acid dehydrogenase 2C E1 component 2C beta subunit EC 1.2.4.4                   |
| Rothia dentocariosa | VBIRotDen115472_1415 | capsular polysaccharide biosynthesis protein                                                              |
| Rothia dentocariosa | VBIRotDen160907_1697 | capsular polysaccharide biosynthesis protein                                                              |
| Rothia dentocariosa | VBIRotDen160907_2122 | Cell division protein FtsK                                                                                |
| Rothia dentocariosa | VBIRotDen115472_1231 | Cell division trigger factor EC 5.2.1.8                                                                   |
| Rothia dentocariosa | VBIRotDen160907_0551 | ClpB protein                                                                                              |
| Rothia dentocariosa | VBIRotDen115472_0963 | COG1126 ABC-type polar amino acid transport system 2C ATPase component                                    |
| Rothia dentocariosa | VBIRotDen160907_0497 | COG1316 Transcriptional regulator                                                                         |
| Rothia dentocariosa | VBIRotDen115472_2055 | COG4779 ABC-type enterobactin transport system 2C permease component                                      |
| Rothia dentocariosa | VBIRotDen160907_0973 | COG4779 ABC-type enterobactin transport system 2C permease component                                      |
| Rothia dentocariosa | VBIRotDen115472_0211 | Conjugative transfer protein TrbB                                                                         |
| Rothia dentocariosa | VBIRotDen160907_2124 | cytochrome P450                                                                                           |
| Rothia dentocariosa | VBIRotDen115472_0270 | DegT DnrJ EryC1 StrS aminotransferase family enzyme                                                       |
| Rothia dentocariosa | VBIRotDen160907_0317 | Diaminopimelate decarboxylase EC 4.1.1.20                                                                 |
| Rothia dentocariosa | VBIRotDen160907_1069 | DNA-binding response regulator 2C LuxR family                                                             |
| Rothia dentocariosa | VBIRotDen115472_1352 | dTDP-4-dehydrorhamnose reductase EC 1.1.1.133                                                             |
| Rothia dentocariosa | VBIRotDen160907_1715 | dTDP-4-dehydrorhamnose reductase EC 1.1.1.133                                                             |
| Rothia dentocariosa | VBIRotDen115472_0089 | dTDP-glucose 4 2C6-dehydratase EC 4.2.1.46                                                                |
| Rothia dentocariosa | VBIRotDen160907_1708 | dTDP-glucose 4 2C6-dehydratase EC 4.2.1.46                                                                |
| Rothia dentocariosa | VBIRotDen115472_1505 | Enolase EC 4.2.1.11                                                                                       |
| Rothia dentocariosa | VBIRotDen115472_0297 | Ferric hydroxamate ABC transporter TC 3.A.1.14.3 2C ATP-binding protein FhuC                              |
| Rothia dentocariosa | VBIRotDen115472_2074 | FIG01028652 hypothetical protein                                                                          |
| Rothia dentocariosa | VBIRotDen115472_1947 | FIG01028777 hypothetical protein                                                                          |
| Rothia dentocariosa | VBIRotDen160907_2102 | FIG01028860 hypothetical protein                                                                          |
| Rothia dentocariosa | VBIRotDen160907_0190 | FIG01028917 hypothetical protein                                                                          |
| Rothia dentocariosa | VBIRotDen160907_0318 | FIG01029014 hypothetical protein                                                                          |
| Rothia dentocariosa | VBIRotDen160907_0820 | FIG01029288 hypothetical protein                                                                          |
| Rothia dentocariosa | VBIRotDen115472_1695 | FIG01029288 hypothetical protein                                                                          |
| Rothia dentocariosa | VBIRotDen160907_0475 | FIG01029402 hypothetical protein                                                                          |
| Rothia dentocariosa | VBIRotDen115472_0756 | Gamma-aminobutyratealpha-ketoglutarate aminotransferase EC 2.6.1.19                                       |

Table S8

|                     |                      |                                                                                                                    |
|---------------------|----------------------|--------------------------------------------------------------------------------------------------------------------|
| Rothia dentocariosa | VBIRotDen160907_1232 | Glucose-6-phosphate isomerase EC 5.3.1.9                                                                           |
| Rothia dentocariosa | VBIRotDen160907_0134 | Glutamate-1-semialdehyde aminotransferase EC 5.4.3.8                                                               |
| Rothia dentocariosa | VBIRotDen115472_2182 | Glutamine synthetase type I EC 6.3.1.2                                                                             |
| Rothia dentocariosa | VBIRotDen160907_0905 | glycosyl transferase 2C family 2                                                                                   |
| Rothia dentocariosa | VBIRotDen160907_0842 | Glycosyl transferase 2C family 2                                                                                   |
| Rothia dentocariosa | VBIRotDen115472_1657 | Glycosyl transferase 2C family 2                                                                                   |
| Rothia dentocariosa | VBIRotDen115472_0757 | GTP pyrophosphokinase EC 2.7.6.5 2C pppGpp synthetase I                                                            |
| Rothia dentocariosa | VBIRotDen115472_0496 | Heat shock protein 60 family chaperone GroEL                                                                       |
| Rothia dentocariosa | VBIRotDen160907_0593 | Heat shock protein 60 family chaperone GroEL                                                                       |
| Rothia dentocariosa | VBIRotDen115472_1943 | Heme ABC transporter 2C cell surface heme and hemoprotein receptor HmuT                                            |
| Rothia dentocariosa | VBIRotDen115472_0983 | Hemolysins and related proteins containing CBS domains                                                             |
| Rothia dentocariosa | VBIRotDen160907_1102 | Hemolysins and related proteins containing CBS domains                                                             |
| Rothia dentocariosa | VBIRotDen160907_1438 | hypothetical protein                                                                                               |
| Rothia dentocariosa | VBIRotDen160907_2144 | Iron (III) dicitrate transport system permease protein FecD TC 3.A.1.14.1                                          |
| Rothia dentocariosa | VBIRotDen115472_0483 | Isochorismate synthase EC 5.4.4.2                                                                                  |
| Rothia dentocariosa | VBIRotDen160907_0552 | Isochorismate synthase EC 5.4.4.2                                                                                  |
| Rothia dentocariosa | VBIRotDen115472_1915 | L-proline glycine betaine ABC transport system permease protein ProV TC 3.A.1.12.1                                 |
| Rothia dentocariosa | VBIRotDen160907_0813 | Lead 2C cadmium 2C zinc and mercury transporting ATPase EC 3.6.3.3 EC 3.6.3.5 3B Copper-translocating P-type ATP:  |
| Rothia dentocariosa | VBIRotDen160907_1575 | Lipid A export ATP-binding permease protein MsbA                                                                   |
| Rothia dentocariosa | VBIRotDen115472_1952 | Lipid A export ATP-binding permease protein MsbA                                                                   |
| Rothia dentocariosa | VBIRotDen115472_0509 | Long-chain-fatty-acid--CoA ligase EC 6.2.1.3                                                                       |
| Rothia dentocariosa | VBIRotDen160907_0718 | Long-chain-fatty-acid--CoA ligase EC 6.2.1.3                                                                       |
| Rothia dentocariosa | VBIRotDen115472_0763 | Magnesium and cobalt efflux protein CorC                                                                           |
| Rothia dentocariosa | VBIRotDen115472_1741 | Manganese ABC transporter 2C ATP-binding protein SitB                                                              |
| Rothia dentocariosa | VBIRotDen160907_0787 | Manganese ABC transporter 2C inner membrane permease protein SitD                                                  |
| Rothia dentocariosa | VBIRotDen115472_1790 | Manganese ABC transporter 2C inner membrane permease protein SitD                                                  |
| Rothia dentocariosa | VBIRotDen160907_2055 | Manganese ABC transporter 2C inner membrane permease protein SitD                                                  |
| Rothia dentocariosa | VBIRotDen160907_0050 | Manganese ABC transporter 2C inner membrane permease protein SitD                                                  |
| Rothia dentocariosa | VBIRotDen115472_1709 | Manganese ABC transporter 2C periplasmic-binding protein SitA                                                      |
| Rothia dentocariosa | VBIRotDen115472_1506 | Mannose-1-phosphate guanylyltransferase GDP EC 2.7.7.22                                                            |
| Rothia dentocariosa | VBIRotDen115472_0986 | Mannose-6-phosphate isomerase EC 5.3.1.8                                                                           |
| Rothia dentocariosa | VBIRotDen115472_0502 | Methionine ABC transporter ATP-binding protein                                                                     |
| Rothia dentocariosa | VBIRotDen160907_0614 | Methionine ABC transporter ATP-binding protein                                                                     |
| Rothia dentocariosa | VBIRotDen160907_1686 | N-acetylneuraminate synthase EC 2.5.1.56                                                                           |
| Rothia dentocariosa | VBIRotDen115472_1445 | N-acetylneuraminate synthase EC 2.5.1.56                                                                           |
| Rothia dentocariosa | VBIRotDen160907_0814 | NADPH-dependent glyceraldehyde-3-phosphate dehydrogenase EC 1.2.1.13                                               |
| Rothia dentocariosa | VBIRotDen115472_1706 | NADPH-dependent glyceraldehyde-3-phosphate dehydrogenase EC 1.2.1.13                                               |
| Rothia dentocariosa | VBIRotDen115472_1095 | Nitrate nitrite transporter                                                                                        |
| Rothia dentocariosa | VBIRotDen115472_1142 | Nitrate nitrite transporter                                                                                        |
| Rothia dentocariosa | VBIRotDen160907_0394 | Nucleoside 5-triphosphatase RdgB dHAPT 2C dITP 2C XTP-specific EC 3.6.1.15                                         |
| Rothia dentocariosa | VBIRotDen160907_0026 | Nucleoside 5-triphosphatase RdgB dHAPT 2C dITP 2C XTP-specific EC 3.6.1.15                                         |
| Rothia dentocariosa | VBIRotDen115472_0040 | Oligopeptide transport ATP-binding protein OppD TC 3.A.1.5.1                                                       |
| Rothia dentocariosa | VBIRotDen115472_0469 | Osmosensitive K+ channel histidine kinase KdpD EC 2.7.3.-                                                          |
| Rothia dentocariosa | VBIRotDen115472_1899 | Pantoate--beta-alanine ligase EC 6.3.2.1                                                                           |
| Rothia dentocariosa | VBIRotDen115472_1708 | Para-aminobenzoate synthase 2C amidotransferase component EC 2.6.1.85 Para-aminobenzoate synthase 2C aminase       |
| Rothia dentocariosa | VBIRotDen115472_0987 | Phosphate regulon transcriptional regulatory protein PhoB SphR                                                     |
| Rothia dentocariosa | VBIRotDen115472_2122 | Phosphoglucosamine mutase EC 5.4.2.10                                                                              |
| Rothia dentocariosa | VBIRotDen115472_2098 | Polyphosphate kinase 2 EC 2.7.4.1                                                                                  |
| Rothia dentocariosa | VBIRotDen160907_1773 | Polysaccharide biosynthesis protein CpsF                                                                           |
| Rothia dentocariosa | VBIRotDen115472_1331 | Polysaccharide biosynthesis protein CpsF                                                                           |
| Rothia dentocariosa | VBIRotDen115472_1217 | Prolipoprotein diacylglyceryl transferase EC 2.4.99.-                                                              |
| Rothia dentocariosa | VBIRotDen160907_0455 | Prolipoprotein diacylglyceryl transferase EC 2.4.99.-                                                              |
| Rothia dentocariosa | VBIRotDen160907_0146 | Protein export cytoplasm protein SecA ATPase RNA helicase TC 3.A.5.1.1                                             |
| Rothia dentocariosa | VBIRotDen160907_1404 | putative ABC transporter ATP-binding protein                                                                       |
| Rothia dentocariosa | VBIRotDen160907_1242 | putative ABC transporter ATP-binding protein                                                                       |
| Rothia dentocariosa | VBIRotDen115472_1912 | putative ABC transporter ATP-binding protein                                                                       |
| Rothia dentocariosa | VBIRotDen115472_1005 | putative ABC transporter ATP-binding protein                                                                       |
| Rothia dentocariosa | VBIRotDen115472_0107 | Putative coproporphyrinogen III oxidase of BS HemN-type 2C oxygen-independent EC 1.3.99.22 2C in heat shock gene c |
| Rothia dentocariosa | VBIRotDen160907_1177 | putative glutamate uptake system ATP-binding protein                                                               |
| Rothia dentocariosa | VBIRotDen115472_1330 | putative protein phosphatase                                                                                       |
| Rothia dentocariosa | VBIRotDen160907_2129 | putative two-component system response regulator                                                                   |
| Rothia dentocariosa | VBIRotDen115472_1999 | putative two-component system response regulator                                                                   |
| Rothia dentocariosa | VBIRotDen160907_1405 | Pyrraline-5-carboxylate reductase EC 1.5.1.2                                                                       |
| Rothia dentocariosa | VBIRotDen115472_1514 | Pyrraline-5-carboxylate reductase EC 1.5.1.2                                                                       |
| Rothia dentocariosa | VBIRotDen160907_0735 | Pyruvate dehydrogenase E1 component beta subunit EC 1.2.4.1                                                        |
| Rothia dentocariosa | VBIRotDen115472_0516 | Pyruvate dehydrogenase E1 component beta subunit EC 1.2.4.1                                                        |
| Rothia dentocariosa | VBIRotDen115472_1057 | Respiratory nitrate reductase beta chain EC 1.7.99.4                                                               |
| Rothia dentocariosa | VBIRotDen160907_1393 | Respiratory nitrate reductase delta chain EC 1.7.99.4                                                              |
| Rothia dentocariosa | VBIRotDen115472_1077 | Respiratory nitrate reductase delta chain EC 1.7.99.4                                                              |
| Rothia dentocariosa | VBIRotDen115472_1078 | Respiratory nitrate reductase gamma chain EC 1.7.99.4                                                              |
| Rothia dentocariosa | VBIRotDen160907_1352 | Respiratory nitrate reductase gamma chain EC 1.7.99.4                                                              |
| Rothia dentocariosa | VBIRotDen115472_0453 | Response regulator receiverTranscriptional regulatory protein 2C C- terminal                                       |
| Rothia dentocariosa | VBIRotDen115472_1172 | RNA binding methyltransferase FtsJ like                                                                            |
| Rothia dentocariosa | VBIRotDen160907_0267 | RNA binding methyltransferase FtsJ like                                                                            |
| Rothia dentocariosa | VBIRotDen115472_0100 | RNA polymerase sigma factor RpoD                                                                                   |
| Rothia dentocariosa | VBIRotDen115472_0985 | RNA polymerase sigma-54 factor RpoN                                                                                |
| Rothia dentocariosa | VBIRotDen160907_0029 | S-ribosylhomocysteine lyase EC 4.4.1.21 Autoinducer-2 production protein LuxS                                      |
| Rothia dentocariosa | VBIRotDen160907_0135 | Sensor histidine kinase MtrB EC 2.7.3.-                                                                            |
| Rothia dentocariosa | VBIRotDen160907_1175 | Sensor histidine kinase MtrB EC 2.7.3.-                                                                            |

Table S8

|                       |                      |                                                                                                           |
|-----------------------|----------------------|-----------------------------------------------------------------------------------------------------------|
| Rothia dentocariosa   | VBIRotDen115472_0423 | Serine threonine phosphatase PPP EC 3.1.3.16                                                              |
| Rothia dentocariosa   | VBIRotDen160907_1869 | Serine threonine phosphatase PPP EC 3.1.3.16                                                              |
| Rothia dentocariosa   | VBIRotDen160907_1829 | Serine threonine-protein kinase PknA EC 2.7.11.1                                                          |
| Rothia dentocariosa   | VBIRotDen115472_0004 | Sulfate and thiosulfate import ATP-binding protein CysA EC 3.6.3.25                                       |
| Rothia dentocariosa   | VBIRotDen160907_1876 | Superoxide dismutase Mn EC 1.15.1.1                                                                       |
| Rothia dentocariosa   | VBIRotDen115472_0197 | Translation elongation factor Tu                                                                          |
| Rothia dentocariosa   | VBIRotDen115472_1630 | two-component system response regulator                                                                   |
| Rothia dentocariosa   | VBIRotDen160907_1104 | type II secretion system protein E                                                                        |
| Rothia dentocariosa   | VBIRotDen160907_0259 | type II secretion system protein E                                                                        |
| Rothia dentocariosa   | VBIRotDen160907_0193 | UDP-galactopyranose mutase EC 5.4.99.9                                                                    |
| Rothia dentocariosa   | VBIRotDen160907_0068 | UDP-glucose 4-epimerase EC 5.1.3.2                                                                        |
| Rothia dentocariosa   | VBIRotDen160907_0319 | UDP-N-acetylglucosamine 4 2C6-dehydratase EC 4.2.1.-                                                      |
| Rothia dentocariosa   | VBIRotDen115472_2183 | UDP-N-acetylglucosamine 4 2C6-dehydratase EC 4.2.1.-                                                      |
| Rothia dentocariosa   | VBIRotDen160907_1101 | Uncharacterized protein Rv1841c MT1889                                                                    |
| Rothia dentocariosa   | VBIRotDen160907_0546 | Undecaprenyl pyrophosphate synthetase EC 2.5.1.31                                                         |
| Rothia dentocariosa   | VBIRotDen115472_1485 | Undecaprenyl pyrophosphate synthetase EC 2.5.1.31                                                         |
| Rothia dentocariosa   | VBIRotDen115472_2123 | Undecaprenyl-phosphate galactosephosphotransferase EC 2.7.8.6                                             |
| Rothia dentocariosa   | VBIRotDen160907_0105 | Uroporphyrinogen III decarboxylase EC 4.1.1.37                                                            |
| Rothia dentocariosa   | VBIRotDen160907_1176 | Uroporphyrinogen III decarboxylase EC 4.1.1.37                                                            |
| Rothia dentocariosa   | VBIRotDen160907_1325 | UTP--glucose-1-phosphate uridylyltransferase EC 2.7.7.9                                                   |
| Rothia mucilaginosa   | VBIRotMuc152186_0272 | Alkyl hydroperoxide reductase protein C EC 1.6.4.-                                                        |
| Rothia mucilaginosa   | VBIRotMuc23969_1467  | Aspartate racemase EC 5.1.1.13                                                                            |
| Rothia mucilaginosa   | VBIRotMuc23969_0759  | DNA-binding response regulator mtrA                                                                       |
| Rothia mucilaginosa   | VBIRotMuc23969_0747  | FIG01028917 hypothetical protein                                                                          |
| Rothia mucilaginosa   | VBIRotMuc152186_0043 | FIG01029383 hypothetical protein                                                                          |
| Rothia mucilaginosa   | VBIRotMuc23969_0999  | Glucose-6-phosphate isomerase EC 5.3.1.9                                                                  |
| Rothia mucilaginosa   | VBIRotMuc23969_0866  | Glutamate-1-semialdehyde aminotransferase EC 5.4.3.8                                                      |
| Rothia mucilaginosa   | VBIRotMuc152186_0388 | Heme ABC transporter 2C ATPase component HmuV                                                             |
| Rothia mucilaginosa   | VBIRotMuc152186_0995 | Heme ABC transporter 2C cell surface heme and hemoprotein receptor HmuT                                   |
| Rothia mucilaginosa   | VBIRotMuc152186_0402 | Heme ABC transporter 2C permease protein HmuU                                                             |
| Rothia mucilaginosa   | VBIRotMuc23969_0164  | Hemolysins and related proteins containing CBS domains                                                    |
| Rothia mucilaginosa   | VBIRotMuc152186_0387 | L-proline glycine betaine ABC transport system permease protein ProV TC 3.A.1.12.1                        |
| Rothia mucilaginosa   | VBIRotMuc152186_1505 | Osmosensitive K+ channel histidine kinase KdpD EC 2.7.3.-                                                 |
| Rothia mucilaginosa   | VBIRotMuc152186_1506 | Phosphate regulon transcriptional regulatory protein PhoB SphR                                            |
| Rothia mucilaginosa   | VBIRotMuc23969_1521  | Polyphosphate kinase 2 EC 2.7.4.1                                                                         |
| Rothia mucilaginosa   | VBIRotMuc23969_1102  | putative ABC transporter ATP-binding protein                                                              |
| Rothia mucilaginosa   | VBIRotMuc23969_0955  | putative glutamate uptake system ATP-binding protein                                                      |
| Rothia mucilaginosa   | VBIRotMuc23969_1160  | putative two-component system response regulator                                                          |
| Rothia mucilaginosa   | VBIRotMuc23969_0022  | RNA polymerase sigma factor RpoD                                                                          |
| Rothia mucilaginosa   | VBIRotMuc23969_0327  | RNA polymerase sigma-54 factor RpoN                                                                       |
| Rothia mucilaginosa   | VBIRotMuc23969_1624  | Translation elongation factor Tu                                                                          |
| Rothia mucilaginosa   | VBIRotMuc23969_0423  | UDP-galactopyranose mutase EC 5.4.99.9                                                                    |
| Rothia mucilaginosa   | VBIRotMuc23969_0870  | UDP-glucose 4-epimerase EC 5.1.3.2                                                                        |
| Rothia mucilaginosa   | VBIRotMuc23969_1510  | Undecaprenyl-phosphate galactosephosphotransferase EC 2.7.8.6                                             |
| Sanguibacter keddieii | VBISanKed123513_3230 | ABC transporter ATP-binding protein                                                                       |
| Sanguibacter keddieii | VBISanKed123513_3105 | ABC transporter related                                                                                   |
| Sanguibacter keddieii | VBISanKed123513_2388 | Respiratory nitrate reductase beta chain EC 1.7.99.4                                                      |
| Sanguibacter keddieii | VBISanKed123513_1513 | Respiratory nitrate reductase delta chain EC 1.7.99.4                                                     |
| Sanguibacter keddieii | VBISanKed123513_0962 | Respiratory nitrate reductase gamma chain EC 1.7.99.4                                                     |
| Scardovia inopinata   | VBIScaIno39905_0886  | FIG01028777 hypothetical protein                                                                          |
| Scardovia inopinata   | VBIScaIno39905_0278  | hypothetical protein                                                                                      |
| Scardovia inopinata   | VBIScaIno39905_0387  | Lipid A export ATP-binding permease protein MsbA                                                          |
| Scardovia inopinata   | VBIScaIno39905_0901  | Phosphoribosylaminoimidazole-succinocarboxamide synthase EC 6.3.2.6                                       |
| Scardovia inopinata   | VBIScaIno39905_0234  | putative ABC transporter ATP-binding protein                                                              |
| Scardovia inopinata   | VBIScaIno39905_1125  | Response regulator receiver/Transcriptional regulatory protein 2C C- terminal                             |
| Scardovia wiggisiae   | VBIScaWig164405_0832 | 2 2C3-dihydro-2 2C3-dihydroxybenzoate dehydrogenase EC 1.3.1.28 of siderophore biosynthesis               |
| Scardovia wiggisiae   | VBIScaWig164405_0987 | ABC transporter 2C ATP-binding protein                                                                    |
| Scardovia wiggisiae   | VBIScaWig164405_1046 | Branched-chain alpha-keto acid dehydrogenase 2C E1 component 2C beta subunit EC 1.2.4.4                   |
| Scardovia wiggisiae   | VBIScaWig164405_0443 | Isochorismate synthase EC 5.4.4.2                                                                         |
| Selenomonas artemidis | VBISelArt149184_0658 | 3-oxoacyl-acyl-carrier-protein synthase 2C KASII EC 2.3.1.41                                              |
| Selenomonas artemidis | VBISelArt149184_1889 | Pyruvate dehydrogenase E1 component beta subunit EC 1.2.4.1                                               |
| Selenomonas flueggei  | VBISelFlu67833_1981  | ATP-dependent Clp protease 2C ATP-binding subunit ClpC Negative regulator of genetic competence clcC mecB |
| Selenomonas noxia     | VBISelNox155289_1613 | ABC transporter 2C ATP-binding protein                                                                    |
| Selenomonas noxia     | VBISelNox28994_0710  | ABC-type Fe3+-siderophore transport system 2C permease component                                          |
| Selenomonas noxia     | VBISelNox28994_1333  | capsular polysaccharide biosynthesis protein                                                              |
| Selenomonas noxia     | VBISelNox28994_1106  | COG1120 ABC-type cobalamin Fe3+-siderophores transport systems 2C ATPase components                       |
| Selenomonas noxia     | VBISelNox28994_1346  | dTDP-glucose 4 2C6-dehydratase EC 4.2.1.46                                                                |
| Selenomonas noxia     | VBISelNox28994_1166  | Enolase EC 4.2.1.11                                                                                       |
| Selenomonas noxia     | VBISelNox28994_0678  | FIG01028860 hypothetical protein                                                                          |
| Selenomonas noxia     | VBISelNox155289_0673 | FIG01029288 hypothetical protein                                                                          |
| Selenomonas noxia     | VBISelNox28994_0718  | FIG01029383 hypothetical protein                                                                          |
| Selenomonas noxia     | VBISelNox28994_1345  | Glucose-1-phosphate thymidyltransferase EC 2.7.7.24                                                       |
| Selenomonas noxia     | VBISelNox155289_1080 | glycosyl transferase 2C family 2                                                                          |
| Selenomonas noxia     | VBISelNox155289_0837 | Glycosyl transferase 2C family 2                                                                          |
| Selenomonas noxia     | VBISelNox28994_0742  | Heme ABC transporter 2C ATPase component HmuV                                                             |
| Selenomonas noxia     | VBISelNox28994_0911  | Heme ABC transporter 2C cell surface heme and hemoprotein receptor HmuT                                   |
| Selenomonas noxia     | VBISelNox28994_0706  | Iron (III) dicitrate transport system permease protein FecD TC 3.A.1.14.1                                 |
| Selenomonas noxia     | VBISelNox28994_0719  | L-proline glycine betaine ABC transport system permease protein ProV TC 3.A.1.12.1                        |
| Selenomonas noxia     | VBISelNox28994_1569  | Long-chain-fatty-acid--CoA ligase EC 6.2.1.3                                                              |

Table S8

|                                |                      |                                                                                                           |
|--------------------------------|----------------------|-----------------------------------------------------------------------------------------------------------|
| Selenomonas noxia              | VBISelNox28994_1899  | Long-chain-fatty-acid--CoA ligase EC 6.2.1.3                                                              |
| Selenomonas noxia              | VBISelNox28994_1737  | Long-chain-fatty-acid--CoA ligase EC 6.2.1.3                                                              |
| Selenomonas noxia              | VBISelNox28994_1562  | Long-chain-fatty-acid--CoA ligase EC 6.2.1.3                                                              |
| Selenomonas noxia              | VBISelNox28994_1529  | Long-chain-fatty-acid--CoA ligase EC 6.2.1.3                                                              |
| Selenomonas noxia              | VBISelNox155289_0192 | Manganese ABC transporter 2C inner membrane permease protein SitD                                         |
| Selenomonas noxia              | VBISelNox28994_0216  | Manganese ABC transporter 2C inner membrane permease protein SitD                                         |
| Selenomonas noxia              | VBISelNox28994_1108  | Mannose-1-phosphate guanylyltransferase GDP EC 2.7.7.22                                                   |
| Selenomonas noxia              | VBISelNox28994_1326  | N-acetylneuraminate synthase EC 2.5.1.56                                                                  |
| Selenomonas noxia              | VBISelNox28994_0942  | Osmosensitive K+ channel histidine kinase KdpD EC 2.7.3.-                                                 |
| Selenomonas noxia              | VBISelNox155289_1449 | Osmosensitive K+ channel histidine kinase KdpD EC 2.7.3.-                                                 |
| Selenomonas noxia              | VBISelNox155289_0108 | Pantoate--beta-alanine ligase EC 6.3.2.1                                                                  |
| Selenomonas noxia              | VBISelNox155289_0345 | Para-aminobenzoate synthase 2C amidotransferase component EC 2.6.1.85                                     |
| Selenomonas noxia              | VBISelNox28994_1432  | Polysaccharide biosynthesis protein CpsF                                                                  |
| Selenomonas noxia              | VBISelNox155289_0274 | putative ABC transporter ATP-binding protein                                                              |
| Selenomonas noxia              | VBISelNox28994_0681  | putative two-component system response regulator                                                          |
| Selenomonas noxia              | VBISelNox155289_1725 | Serine threonine protein kinase PrkC 2C regulator of stationary phase                                     |
| Selenomonas noxia              | VBISelNox155289_1926 | Serine threonine-protein kinase PknA EC 2.7.11.1                                                          |
| Selenomonas noxia              | VBISelNox28994_1280  | Undecaprenyl pyrophosphate synthetase EC 2.5.1.31                                                         |
| Selenomonas noxia              | VBISelNox28994_0660  | Zinc ABC transporter 2C ATP-binding protein ZnuC                                                          |
| Selenomonas sp. oral taxon 137 | VBISelSp169704_0964  | ABC-type multidrug transport system 2C ATPase component                                                   |
| Selenomonas sp. oral taxon 137 | VBISelSp169704_0435  | ATP synthase alpha chain EC 3.6.3.14                                                                      |
| Selenomonas sp. oral taxon 137 | VBISelSp169704_0434  | Long-chain-fatty-acid--CoA ligase EC 6.2.1.3                                                              |
| Selenomonas sp. oral taxon 137 | VBISelSp169704_1468  | Nucleoside 5-triphosphatase RdgB dHAPT 2C dITP 2C XTP-specific EC 3.6.1.15                                |
| Selenomonas sp. oral taxon 149 | VBISelSp164981_1958  | 2 2C3-dihydroxybenzoate-AMP ligase EC 2.7.7.58                                                            |
| Selenomonas sp. oral taxon 149 | VBISelSp164981_1907  | 3-isopropylmalate dehydratase small subunit EC 4.2.1.33                                                   |
| Selenomonas sp. oral taxon 149 | VBISelSp164981_1775  | 3-oxoacyl-acyl-carrier-protein synthase 2C KASII EC 2.3.1.41                                              |
| Selenomonas sp. oral taxon 149 | VBISelSp164981_2113  | ABC transporter                                                                                           |
| Selenomonas sp. oral taxon 149 | VBISelSp164981_1903  | Cell division trigger factor EC 5.2.1.8                                                                   |
| Selenomonas sp. oral taxon 149 | VBISelSp164981_1882  | COG1316 Transcriptional regulator                                                                         |
| Selenomonas sp. oral taxon 149 | VBISelSp164981_2121  | FIG01029217 hypothetical protein                                                                          |
| Selenomonas sp. oral taxon 149 | VBISelSp164981_1901  | Magnesium and cobalt efflux protein CorC                                                                  |
| Selenomonas sp. oral taxon 149 | VBISelSp164981_1823  | NAD-dependent glyceraldehyde-3-phosphate dehydrogenase EC 1.2.1.12                                        |
| Selenomonas sp. oral taxon 149 | VBISelSp164981_1808  | Prolipoprotein diacylglycerol transferase EC 2.4.99.-                                                     |
| Selenomonas sp. oral taxon 149 | VBISelSp164981_0377  | Transport ATP-binding protein CydCD                                                                       |
| Selenomonas sp. oral taxon 149 | VBISelSp164981_1899  | Undecaprenyl pyrophosphate synthetase EC 2.5.1.31                                                         |
| Selenomonas sputigena          | VBISelSpu76100_1994  | ABC transporter                                                                                           |
| Selenomonas sputigena          | VBISelSpu76100_2239  | ATP-dependent Clp protease 2C ATP-binding subunit ClpC Negative regulator of genetic competence clcC mecB |
| Selenomonas sputigena          | VBISelSpu76100_0160  | DNA-binding response regulator 2C LuxR family                                                             |
| Selenomonas sputigena          | VBISelSpu76100_0177  | glycosyl transferase 2C family 2                                                                          |
| Selenomonas sputigena          | VBISelSpu76100_0179  | Lipid A export ATP-binding permease protein MsbA                                                          |
| Selenomonas sputigena          | VBISelSpu76100_1713  | Mannose-6-phosphate isomerase EC 5.3.1.8                                                                  |
| Selenomonas sputigena          | VBISelSpu76100_1729  | Phosphomannomutase EC 5.4.2.8                                                                             |
| Selenomonas sputigena          | VBISelSpu76100_0187  | Respiratory nitrate reductase alpha chain EC 1.7.99.4                                                     |
| Selenomonas sputigena          | VBISelSpu76100_0674  | Respiratory nitrate reductase beta chain EC 1.7.99.4                                                      |
| Selenomonas sputigena          | VBISelSpu76100_0912  | Translation elongation factor Tu                                                                          |
| Selenomonas sputigena          | VBISelSpu76100_1046  | Vitamin B12 ABC transporter 2C permease component BtuC                                                    |
| Shuttleworthia satelles        | VBIShuSat84517_0293  | ABC-type multidrug transport system 2C ATPase component                                                   |
| Shuttleworthia satelles        | VBIShuSat84517_1407  | Lipid A export ATP-binding permease protein MsbA                                                          |
| Shuttleworthia satelles        | VBIShuSat84517_0392  | S-ribosylhomocysteine lyase EC 4.4.1.21 Autoinducer-2 production protein LuxS                             |
| Simonsiella muelleri           | VBISimMue52162_0391  | Flp pilus assembly protein 2C ATPase CpaF                                                                 |
| Simonsiella muelleri           | VBISimMue52162_2173  | Glutamine synthetase type I EC 6.3.1.2                                                                    |
| Simonsiella muelleri           | VBISimMue52162_2519  | Magnesium and cobalt efflux protein CorC                                                                  |
| Simonsiella muelleri           | VBISimMue52162_1703  | Nitrate nitrite transporter                                                                               |
| Simonsiella muelleri           | VBISimMue52162_1490  | Respiratory nitrate reductase beta chain EC 1.7.99.4                                                      |
| Simonsiella muelleri           | VBISimMue52162_1975  | UDP-glucose 4-epimerase EC 5.1.3.2                                                                        |
| Simonsiella muelleri           | VBISimMue52162_1727  | UTP--glucose-1-phosphate uridylyltransferase EC 2.7.7.9                                                   |
| Slackia exigua                 | VBISlaExi87248_0113  | acyltransferase 3                                                                                         |
| Slackia exigua                 | VBISlaExi87248_0665  | Alkyl hydroperoxide reductase protein C EC 1.6.4.-                                                        |
| Slackia exigua                 | VBISlaExi87248_0474  | COG1316 Transcriptional regulator                                                                         |
| Slackia exigua                 | VBISlaExi87248_1268  | Diaminopimelate decarboxylase EC 4.1.1.20                                                                 |
| Slackia exigua                 | VBISlaExi87248_1312  | Response regulator receiver Transcriptional regulatory protein 2C C- terminal                             |
| Slackia exigua                 | VBISlaExi87248_1785  | Two-component system 2C sensor protein                                                                    |
| Slackia exigua                 | VBISlaExi87248_0282  | Undecaprenyl pyrophosphate synthetase EC 2.5.1.31                                                         |
| Staphylococcus aureus          | VBIStaAur127832_2042 | 1 2C4-beta-N-acetylmuramidase                                                                             |
| Staphylococcus aureus          | VBIStaAur163139_2087 | 3-oxoacyl-acyl-carrier protein reductase EC 1.1.1.100                                                     |
| Staphylococcus aureus          | VBIStaAur163139_0301 | Cell division trigger factor EC 5.2.1.8                                                                   |
| Staphylococcus aureus          | VBIStaAur163139_1537 | Chemotaxis protein CheV EC 2.7.3.-                                                                        |
| Staphylococcus aureus          | VBIStaAur165978_0767 | Chemotaxis regulator - transmits chemoreceptor signals to flagellar motor components CheY                 |
| Staphylococcus aureus          | VBIStaAur163139_1707 | Cytochrome c heme lyase subunit CcmF                                                                      |
| Staphylococcus aureus          | VBIStaAur165978_1857 | Flagellar hook protein FlgE                                                                               |
| Staphylococcus aureus          | VBIStaAur165978_1099 | Flagellar hook protein FlgE                                                                               |
| Staphylococcus aureus          | VBIStaAur163139_1077 | Flagellar hook protein FlgE                                                                               |
| Staphylococcus aureus          | VBIStaAur163139_1096 | Flagellar hook protein FlgE                                                                               |
| Staphylococcus aureus          | VBIStaAur165978_0596 | Flagellar M-ring protein FlilF                                                                            |
| Staphylococcus aureus          | VBIStaAur165978_2362 | Flagellar motor rotation protein MotB                                                                     |
| Staphylococcus aureus          | VBIStaAur163139_2553 | Flagellum-specific ATP synthase FliI                                                                      |
| Staphylococcus aureus          | VBIStaAur127832_1059 | FUPA23 P-type ATPase                                                                                      |
| Staphylococcus aureus          | VBIStaAur163139_0888 | Heat shock protein 60 family chaperone GroEL                                                              |
| Staphylococcus aureus          | VBIStaAur163139_2348 | Heat shock protein 60 family chaperone GroEL                                                              |

Table S8

|                              |                      |                                                                                                                       |
|------------------------------|----------------------|-----------------------------------------------------------------------------------------------------------------------|
| Staphylococcus aureus        | VBIStaAur127832_0422 | Hemolysins and related proteins containing CBS domains                                                                |
| Staphylococcus aureus        | VBIStaAur163139_2329 | hypothetical protein                                                                                                  |
| Staphylococcus aureus        | VBIStaAur127832_0899 | Methionine ABC transporter ATP-binding protein                                                                        |
| Staphylococcus aureus        | VBIStaAur127832_2608 | NAD-dependent glyceraldehyde-3-phosphate dehydrogenase EC 1.2.1.12                                                    |
| Staphylococcus aureus        | VBIStaAur163139_1595 | NLP P60                                                                                                               |
| Staphylococcus aureus        | VBIStaAur165978_0701 | Positive regulator of CheA protein activity CheW                                                                      |
| Staphylococcus aureus        | VBIStaAur127832_1040 | Protein export cytoplasm protein SecA ATPase RNA helicase TC 3.A.5.1.1                                                |
| Staphylococcus aureus        | VBIStaAur127832_1276 | putative ABC transporter ATP-binding protein                                                                          |
| Staphylococcus aureus        | VBIStaAur163139_2078 | Radical SAM family protein HutW 2C similar to coproporphyrinogen III oxidase 2C oxygen-independent 2C associated with |
| Staphylococcus aureus        | VBIStaAur127832_1192 | RNA polymerase sigma factor RpoD                                                                                      |
| Staphylococcus aureus        | VBIStaAur163139_1810 | TonB-dependent receptor                                                                                               |
| Staphylococcus aureus        | VBIStaAur127832_0507 | Translation elongation factor Tu                                                                                      |
| Staphylococcus aureus        | VBIStaAur127832_1812 | Translation elongation factor Tu                                                                                      |
| Staphylococcus aureus        | VBIStaAur163139_1118 | Translation elongation factor Tu                                                                                      |
| Staphylococcus aureus        | VBIStaAur163139_0312 | Transport ATP-binding protein CydC                                                                                    |
| Staphylococcus aureus        | VBIStaAur163139_2010 | UDP-glucose 4-epimerase EC 5.1.3.2                                                                                    |
| Staphylococcus aureus        | VBIStaAur127832_2549 | Vitamin B12 ABC transporter 2C ATPase component BtuD                                                                  |
| Staphylococcus caprae        | VBIStaCap114454_1643 | Flagellar motor switch protein FlIM                                                                                   |
| Staphylococcus epidermidis   | VBIStaEpi34063_1020  | Chemotaxis regulator - transmits chemoreceptor signals to flagellar motor components CheY                             |
| Staphylococcus warneri       | VBIStaWar127182_1987 | Enolase EC 4.2.1.11                                                                                                   |
| Staphylococcus warneri       | VBIStaWar127182_0805 | Flagellar biosynthesis protein FlhA                                                                                   |
| Staphylococcus warneri       | VBIStaWar127182_0185 | Flagellar biosynthesis protein FlhP                                                                                   |
| Staphylococcus warneri       | VBIStaWar127182_0824 | Heat shock protein 60 family chaperone GroEL                                                                          |
| Staphylococcus warneri       | VBIStaWar127182_1133 | Phosphomannomutase EC 5.4.2.8                                                                                         |
| Stenotrophomonas maltophilia | VBISteMal45202_3983  | Chemotaxis protein methyltransferase CheR EC 2.1.1.80                                                                 |
| Stenotrophomonas maltophilia | VBISteMal45202_3449  | Flagellar basal-body rod protein FlgC                                                                                 |
| Stenotrophomonas maltophilia | VBISteMal45202_2607  | Flagellar motor rotation protein MotA                                                                                 |
| Stenotrophomonas maltophilia | VBISteMal40512_3668  | Large exoproteins involved in heme utilization or adhesion                                                            |
| Stenotrophomonas maltophilia | VBISteMal40512_2480  | Mannose-1-phosphate guanylyltransferase GDP EC 2.7.7.22                                                               |
| Stenotrophomonas maltophilia | VBISteMal40512_0572  | Mannose-1-phosphate guanylyltransferase GDP EC 2.7.7.22                                                               |
| Stenotrophomonas maltophilia | VBISteMal45202_3651  | Signal transduction histidine kinase CheA EC 2.7.3.-                                                                  |
| Stenotrophomonas sp.         | VBISteSp70125_1734   | dTDP-4-dehydrorhamnose 3 2C5-epimerase EC 5.1.3.13                                                                    |
| Stenotrophomonas sp.         | VBISteSp70125_2066   | GDP-L-fucose synthetase EC 1.1.1.271                                                                                  |
| Stenotrophomonas sp.         | VBISteSp70125_1188   | Transcriptional coregulator CytR                                                                                      |
| Streptococcus agalactiae     | VBIStrAga3577_1406   | ABC transporter 2C ATP-binding protein                                                                                |
| Streptococcus agalactiae     | VBIStrAga3577_0989   | ADP-L-glycero-D-manno-heptose-6-epimerase EC 5.1.3.20                                                                 |
| Streptococcus agalactiae     | VBIStrAga70477_0088  | ATP-dependent protease ATP-binding subunit clpL                                                                       |
| Streptococcus agalactiae     | VBIStrAga82541_1014  | ATP-dependent protease ATP-binding subunit clpL                                                                       |
| Streptococcus agalactiae     | VBIStrAga70477_1440  | Cell division trigger factor EC 5.2.1.8                                                                               |
| Streptococcus agalactiae     | VBIStrAga70477_0315  | Cell division trigger factor EC 5.2.1.8                                                                               |
| Streptococcus agalactiae     | VBIStrAga82541_1287  | Clumping factor ClfB 2C fibrinogen binding protein                                                                    |
| Streptococcus agalactiae     | VBIStrAga70477_0554  | Clumping factor ClfB 2C fibrinogen binding protein                                                                    |
| Streptococcus agalactiae     | VBIStrAga82541_1267  | Clumping factor ClfB 2C fibrinogen binding protein                                                                    |
| Streptococcus agalactiae     | VBIStrAga70477_0491  | Clumping factor ClfB 2C fibrinogen binding protein                                                                    |
| Streptococcus agalactiae     | VBIStrAga82541_1554  | Collagen binding protein Cna                                                                                          |
| Streptococcus agalactiae     | VBIStrAga72745_1171  | Collagen binding protein Cna                                                                                          |
| Streptococcus agalactiae     | VBIStrAga82541_1410  | Collagen binding protein Cna                                                                                          |
| Streptococcus agalactiae     | VBIStrAga57283_1742  | Cytochrome c heme lyase subunit CcmF                                                                                  |
| Streptococcus agalactiae     | VBIStrAga70477_0903  | Extracellular adherence protein of broad specificity Eap Map                                                          |
| Streptococcus agalactiae     | VBIStrAga72745_1313  | Fibronectin binding protein FnbB                                                                                      |
| Streptococcus agalactiae     | VBIStrAga82541_1713  | FtsK SpoIIIE family protein 2C putative secretion system component EssC YukA                                          |
| Streptococcus agalactiae     | VBIStrAga70477_1276  | FtsK SpoIIIE family protein 2C putative secretion system component EssC YukA                                          |
| Streptococcus agalactiae     | VBIStrAga72745_1774  | Gamma-hemolysin component C                                                                                           |
| Streptococcus agalactiae     | VBIStrAga70477_1192  | Heme efflux system ATPase HrtA                                                                                        |
| Streptococcus agalactiae     | VBIStrAga82541_0645  | Histidine kinase of the competence regulon ComD                                                                       |
| Streptococcus agalactiae     | VBIStrAga70477_0559  | Histidine kinase of the competence regulon ComD                                                                       |
| Streptococcus agalactiae     | VBIStrAga57283_2043  | hypothetical protein                                                                                                  |
| Streptococcus agalactiae     | VBIStrAga57283_1247  | L-proline glycine betaine ABC transport system permease protein ProV TC 3.A.1.12.1                                    |
| Streptococcus agalactiae     | VBIStrAga3577_1387   | Magnesium and cobalt efflux protein CorC                                                                              |
| Streptococcus agalactiae     | VBIStrAga3577_0649   | Mannose-1-phosphate guanylyltransferase GDP EC 2.7.7.22                                                               |
| Streptococcus agalactiae     | VBIStrAga3577_1974   | N-acetylneuraminase synthase EC 2.5.1.56                                                                              |
| Streptococcus agalactiae     | VBIStrAga57283_1520  | NAD-dependent glyceraldehyde-3-phosphate dehydrogenase EC 1.2.1.12                                                    |
| Streptococcus agalactiae     | VBIStrAga70477_1426  | NADPH-dependent glyceraldehyde-3-phosphate dehydrogenase EC 1.2.1.13                                                  |
| Streptococcus agalactiae     | VBIStrAga70477_1796  | Oligopeptide transport ATP-binding protein OppF TC 3.A.1.5.1                                                          |
| Streptococcus agalactiae     | VBIStrAga70477_0948  | Oligopeptide transport ATP-binding protein OppF TC 3.A.1.5.1                                                          |
| Streptococcus agalactiae     | VBIStrAga70477_1951  | Peptidyl-prolyl cis-trans isomerase EC 5.2.1.8                                                                        |
| Streptococcus agalactiae     | VBIStrAga3577_1508   | Putative coproporphyrinogen III oxidase of BS HemN-type 2C oxygen-independent EC 1.3.99.22 2C in heat shock gene c    |
| Streptococcus agalactiae     | VBIStrAga70477_1822  | Putative O-acetyltransferase SAS0844 EC 2.3.1.-                                                                       |
| Streptococcus agalactiae     | VBIStrAga70477_1509  | putative permease                                                                                                     |
| Streptococcus agalactiae     | VBIStrAga72745_0628  | Putative secretion system component EssB YukC                                                                         |
| Streptococcus agalactiae     | VBIStrAga82541_1969  | Putative Staphylococcal surface anchored protein                                                                      |
| Streptococcus agalactiae     | VBIStrAga82541_1738  | Putative Staphylococcal surface anchored protein                                                                      |
| Streptococcus agalactiae     | VBIStrAga82541_1752  | Putative Staphylococcal surface anchored protein                                                                      |
| Streptococcus agalactiae     | VBIStrAga82541_1757  | Putative Staphylococcal surface anchored protein                                                                      |
| Streptococcus agalactiae     | VBIStrAga82541_1787  | Putative Staphylococcal surface anchored protein                                                                      |
| Streptococcus agalactiae     | VBIStrAga41311_0013  | RNA polymerase sigma factor RpoH                                                                                      |
| Streptococcus agalactiae     | VBIStrAga70477_0224  | Serine protease 2C DegP HtrA 2C do-like EC 3.4.21.-                                                                   |
| Streptococcus agalactiae     | VBIStrAga70477_1272  | Staphylocoagulase                                                                                                     |
| Streptococcus agalactiae     | VBIStrAga72745_0672  | Staphylocoagulase                                                                                                     |

Table S8

|                           |                      |                                                                                                                         |
|---------------------------|----------------------|-------------------------------------------------------------------------------------------------------------------------|
| Streptococcus agalactiae  | VBIStrAga3577_1790   | Teichoic acid export ATP-binding protein TagH EC 3.6.3.40                                                               |
| Streptococcus agalactiae  | VBIStrAga41311_0801  | TonB-dependent hemin 2C ferrichrome receptor                                                                            |
| Streptococcus agalactiae  | VBIStrAga41311_0545  | Translation elongation factor Tu                                                                                        |
| Streptococcus agalactiae  | VBIStrAga57283_1713  | Translation elongation factor Tu                                                                                        |
| Streptococcus agalactiae  | VBIStrAga70477_0188  | Translation elongation factor Tu                                                                                        |
| Streptococcus agalactiae  | VBIStrAga57283_1708  | Transport ATP-binding protein CydC                                                                                      |
| Streptococcus agalactiae  | VBIStrAga70477_0084  | Transport ATP-binding protein CydD                                                                                      |
| Streptococcus agalactiae  | VBIStrAga72745_1414  | Transport ATP-binding protein CydD                                                                                      |
| Streptococcus agalactiae  | VBIStrAga57283_1040  | Type IV pilin PIIA                                                                                                      |
| Streptococcus agalactiae  | VBIStrAga57283_1098  | Tyrosine-protein kinase Wzc EC 2.7.10.2                                                                                 |
| Streptococcus agalactiae  | VBIStrAga72745_1170  | UDP-glucose 4-epimerase EC 5.1.3.2                                                                                      |
| Streptococcus agalactiae  | VBIStrAga82541_0514  | Uncharacterized siderophore biosynthesis protein near heme transporter HtsABC Siderophore synthetase superfamily 2C     |
| Streptococcus australis   | VBIStrAus172715_0874 | Putative Staphylococcal surface anchored protein                                                                        |
| Streptococcus australis   | VBIStrAus172715_0935 | Putative Staphylococcal surface anchored protein                                                                        |
| Streptococcus cristatus   | VBIStrCri174845_0313 | Putative Staphylococcal surface anchored protein                                                                        |
| Streptococcus cristatus   | VBIStrCri174845_0929 | Putative Staphylococcal surface anchored protein                                                                        |
| Streptococcus cristatus   | VBIStrCri174845_1367 | Putative Staphylococcal surface anchored protein                                                                        |
| Streptococcus cristatus   | VBIStrCri174845_1230 | Putative Staphylococcal surface anchored protein                                                                        |
| Streptococcus cristatus   | VBIStrCri174845_0752 | Putative Staphylococcal surface anchored protein                                                                        |
| Streptococcus cristatus   | VBIStrCri174845_0751 | Putative Staphylococcal surface anchored protein                                                                        |
| Streptococcus cristatus   | VBIStrCri174845_0552 | Putative Staphylococcal surface anchored protein                                                                        |
| Streptococcus cristatus   | VBIStrCri174845_0644 | Putative Staphylococcal surface anchored protein                                                                        |
| Streptococcus cristatus   | VBIStrCri174845_1215 | Putative Staphylococcal surface anchored protein                                                                        |
| Streptococcus cristatus   | VBIStrCri174845_0309 | Putative Staphylococcal surface anchored protein                                                                        |
| Streptococcus downei      | VBIStrDow169691_1096 | Putative Staphylococcal surface anchored protein                                                                        |
| Streptococcus downei      | VBIStrDow169691_1046 | Putative Staphylococcal surface anchored protein                                                                        |
| Streptococcus downei      | VBIStrDow169691_0264 | Putative Staphylococcal surface anchored protein                                                                        |
| Streptococcus gordonii    | VBIStrGor124371_1718 | Bifunctional autolysin Atl N-acetylmuramoyl-L-alanine amidase EC 3.5.1.28 endo-beta-N-acetylglucosaminidase EC 3.2.1.17 |
| Streptococcus gordonii    | VBIStrGor124371_0944 | Putative O-acetyltransferase SAS0844 EC 2.3.1.-                                                                         |
| Streptococcus gordonii    | VBIStrGor124371_0566 | Putative Staphylococcal surface anchored protein                                                                        |
| Streptococcus gordonii    | VBIStrGor124371_1288 | Urease alpha subunit EC 3.5.1.5                                                                                         |
| Streptococcus intermedius | VBIStrInt27041_1679  | 2-amino-3-ketobutyrate coenzyme A ligase EC 2.3.1.29                                                                    |
| Streptococcus intermedius | VBIStrInt27041_1617  | NAD-dependent glyceraldehyde-3-phosphate dehydrogenase EC 1.2.1.12                                                      |
| Streptococcus intermedius | VBIStrInt27041_1227  | Protein export cytoplasm protein SecA ATPase RNA helicase TC 3.A.5.1.1                                                  |
| Streptococcus intermedius | VBIStrInt27041_0354  | Urease gamma subunit EC 3.5.1.5                                                                                         |
| Streptococcus mitis       | VBIStrMit169061_0254 | 2 2C3-dihydroxybenzoate-AMP ligase EC 2.7.7.58                                                                          |
| Streptococcus mitis       | VBIStrMit75374_1377  | ABC transporter 2C ATP-binding permease protein                                                                         |
| Streptococcus mitis       | VBIStrMit226415_1351 | ABC transporter 2C ATP-binding protein                                                                                  |
| Streptococcus mitis       | VBIStrMit169061_1497 | ABC transporter ATP-binding protein                                                                                     |
| Streptococcus mitis       | VBIStrMit12054_1096  | Acetylornithine aminotransferase EC 2.6.1.11                                                                            |
| Streptococcus mitis       | VBIStrMit102292_1215 | Acyl-coenzyme A synthetases AMP-fatty acid ligases 2C Ytcl homolog                                                      |
| Streptococcus mitis       | VBIStrMit169061_0122 | agglutinin receptor                                                                                                     |
| Streptococcus mitis       | VBIStrMit226415_1377 | ATP synthase beta chain EC 3.6.3.14                                                                                     |
| Streptococcus mitis       | VBIStrMit3699_0681   | ATP synthase beta chain EC 3.6.3.14                                                                                     |
| Streptococcus mitis       | VBIStrMit169061_1550 | ATP synthase beta chain EC 3.6.3.14                                                                                     |
| Streptococcus mitis       | VBIStrMit188413_0184 | ATP-dependent Clp protease 2C ATP-binding subunit ClpE                                                                  |
| Streptococcus mitis       | VBIStrMit187246_1368 | ATP-dependent Clp protease 2C ATP-binding subunit ClpE                                                                  |
| Streptococcus mitis       | VBIStrMit226415_0438 | ATP-dependent Clp protease ATP-binding subunit ClpA                                                                     |
| Streptococcus mitis       | VBIStrMit187065_1076 | ATPase component of general energizing module of ECF transporters                                                       |
| Streptococcus mitis       | VBIStrMit169061_1574 | Beta-1 2C3-glucosyltransferase                                                                                          |
| Streptococcus mitis       | VBIStrMit187246_0212 | C5a peptidase EC 3.4.21.-                                                                                               |
| Streptococcus mitis       | VBIStrMit188413_1524 | C5a peptidase EC 3.4.21.-                                                                                               |
| Streptococcus mitis       | VBIStrMit3699_0636   | Candidate zinc-binding lipoprotein ZinT                                                                                 |
| Streptococcus mitis       | VBIStrMit169061_0408 | Capsular polysaccharide biosynthesis protein CpsKV                                                                      |
| Streptococcus mitis       | VBIStrMit187065_1463 | Capsular polysaccharide biosynthesis protein CpsI                                                                       |
| Streptococcus mitis       | VBIStrMit3699_1681   | Cell envelope-associated transcriptional attenuator LytR-CpsA-Psr 2C subfamily F2 as in PMID19099556                    |
| Streptococcus mitis       | VBIStrMit169061_0202 | Cell wall surface anchor family protein                                                                                 |
| Streptococcus mitis       | VBIStrMit169061_1397 | Cell wall surface anchor family protein                                                                                 |
| Streptococcus mitis       | VBIStrMit169061_0520 | Cell wall surface anchor family protein                                                                                 |
| Streptococcus mitis       | VBIStrMit169061_1421 | Cell wall surface anchor family protein 2C FPXTG motif                                                                  |
| Streptococcus mitis       | VBIStrMit161611_1749 | Cell wall surface anchor family protein 2C FPXTG motif                                                                  |
| Streptococcus mitis       | VBIStrMit169061_0618 | Cell wall surface anchor family protein 2C FPXTG motif                                                                  |
| Streptococcus mitis       | VBIStrMit11393_1012  | Chemotaxis protein cheA EC 2.7.3.-                                                                                      |
| Streptococcus mitis       | VBIStrMit11393_1100  | Chemotaxis protein cheA EC 2.7.3.-                                                                                      |
| Streptococcus mitis       | VBIStrMit11393_1878  | Chemotaxis protein cheA EC 2.7.3.-                                                                                      |
| Streptococcus mitis       | VBIStrMit218081_1250 | Cyclopropane-fatty-acyl-phospholipid synthase EC 2.1.1.79                                                               |
| Streptococcus mitis       | VBIStrMit187246_0583 | CylF                                                                                                                    |
| Streptococcus mitis       | VBIStrMit188413_1042 | Enolase EC 4.2.1.11                                                                                                     |
| Streptococcus mitis       | VBIStrMit187246_0491 | Enolase EC 4.2.1.11                                                                                                     |
| Streptococcus mitis       | VBIStrMit161611_0870 | Ferrichrome-iron receptor                                                                                               |
| Streptococcus mitis       | VBIStrMit161611_0999 | Flagellar M-ring protein FlIF                                                                                           |
| Streptococcus mitis       | VBIStrMit218081_1360 | Glutamine synthetase type I EC 6.3.1.2                                                                                  |
| Streptococcus mitis       | VBIStrMit222783_0156 | Glycine betaine ABC transport system 2C ATP-binding protein OpuAA EC 3.6.3.32                                           |
| Streptococcus mitis       | VBIStrMit187065_1531 | Glycosyl transferase 2C family 8                                                                                        |
| Streptococcus mitis       | VBIStrMit161611_0583 | Heat shock protein 60 family chaperone GroEL                                                                            |
| Streptococcus mitis       | VBIStrMit11393_0214  | Heat shock protein 60 family chaperone GroEL                                                                            |
| Streptococcus mitis       | VBIStrMit3699_0605   | Hemolysin III                                                                                                           |
| Streptococcus mitis       | VBIStrMit75374_1636  | Hemolysin III                                                                                                           |
| Streptococcus mitis       | VBIStrMit226415_0179 | L-proline glycine betaine ABC transport system permease protein ProV TC 3.A.1.12.1                                      |

Table S8

|                      |                      |                                                                                                                    |
|----------------------|----------------------|--------------------------------------------------------------------------------------------------------------------|
| Streptococcus mitis  | VBIStrMit187246_0183 | Laminin-binding surface protein                                                                                    |
| Streptococcus mitis  | VBIStrMit169061_0353 | Laminin-binding surface protein                                                                                    |
| Streptococcus mitis  | VBIStrMit226415_1116 | Lipid A export ATP-binding permease protein MsbA                                                                   |
| Streptococcus mitis  | VBIStrMit226415_1083 | Lipid A export ATP-binding permease protein MsbA                                                                   |
| Streptococcus mitis  | VBIStrMit226415_0890 | Maltose operon transcriptional repressor MalR 2C LacI family                                                       |
| Streptococcus mitis  | VBIStrMit187065_1809 | Manganese ABC transporter 2C inner membrane permease protein SitD                                                  |
| Streptococcus mitis  | VBIStrMit169061_0819 | N-acetylneuraminase synthase EC 2.5.1.56                                                                           |
| Streptococcus mitis  | VBIStrMit187246_1365 | NAD-dependent glyceraldehyde-3-phosphate dehydrogenase EC 1.2.1.12 Plasminogen receptor                            |
| Streptococcus mitis  | VBIStrMit218081_1714 | NAD-dependent glyceraldehyde-3-phosphate dehydrogenase EC 1.2.1.12 Plasminogen receptor                            |
| Streptococcus mitis  | VBIStrMit187246_0420 | Oligopeptide transport ATP-binding protein OppD TC 3.A.1.5.1                                                       |
| Streptococcus mitis  | VBIStrMit226415_1495 | Peptidoglycan hydrolase 2C Autolysin2 EC 3.5.1.28                                                                  |
| Streptococcus mitis  | VBIStrMit187246_0851 | Polysaccharide biosynthesis glycosyl transferase CpsJ                                                              |
| Streptococcus mitis  | VBIStrMit169061_0714 | Polysaccharide biosynthesis glycosyl transferase CpsN                                                              |
| Streptococcus mitis  | VBIStrMit187246_0916 | Polysaccharide biosynthesis glycosyl transferase CpsO                                                              |
| Streptococcus mitis  | VBIStrMit169061_1709 | Protein export cytoplasm protein SecA ATPase RNA helicase TC 3.A.5.1.1                                             |
| Streptococcus mitis  | VBIStrMit226415_0530 | putative ATP-dependent Clp proteinase ATP-binding subunit                                                          |
| Streptococcus mitis  | VBIStrMit188413_1625 | putative ATP-dependent Clp proteinase ATP-binding subunit                                                          |
| Streptococcus mitis  | VBIStrMit187246_0957 | putative ATP-dependent Clp proteinase ATP-binding subunit                                                          |
| Streptococcus mitis  | VBIStrMit169061_0148 | putative ATP-dependent Clp proteinase ATP-binding subunit                                                          |
| Streptococcus mitis  | VBIStrMit226415_0134 | Putative coproporphyrinogen III oxidase of BS HemN-type 2C oxygen-independent EC 1.3.99.22 2C in heat shock gene c |
| Streptococcus mitis  | VBIStrMit161611_0942 | Respiratory nitrate reductase alpha chain EC 1.7.99.4                                                              |
| Streptococcus mitis  | VBIStrMit11393_0821  | Respiratory nitrate reductase gamma chain EC 1.7.99.4                                                              |
| Streptococcus mitis  | VBIStrMit194048_0917 | RNA polymerase sigma factor RpoD                                                                                   |
| Streptococcus mitis  | VBIStrMit169061_1558 | Sensor protein basS pmrB EC 2.7.3.-                                                                                |
| Streptococcus mitis  | VBIStrMit75374_0974  | Serine endopeptidase ScpC EC 3.4.21.-                                                                              |
| Streptococcus mitis  | VBIStrMit222783_0948 | Serine endopeptidase ScpC EC 3.4.21.-                                                                              |
| Streptococcus mitis  | VBIStrMit226415_0718 | Serine protease 2C DegP HtrA 2C do-like EC 3.4.21.-                                                                |
| Streptococcus mitis  | VBIStrMit187246_0982 | Sortase A 2C LPXTG specific                                                                                        |
| Streptococcus mitis  | VBIStrMit187065_0706 | Sortase A 2C LPXTG specific                                                                                        |
| Streptococcus mitis  | VBIStrMit169061_1024 | Surface protein Rib                                                                                                |
| Streptococcus mitis  | VBIStrMit169061_1107 | Surface protein Rib                                                                                                |
| Streptococcus mitis  | VBIStrMit169061_1140 | Surface protein Rib                                                                                                |
| Streptococcus mitis  | VBIStrMit169061_1257 | Surface protein Rib                                                                                                |
| Streptococcus mitis  | VBIStrMit194048_1318 | Transport ATP-binding protein CydC                                                                                 |
| Streptococcus mitis  | VBIStrMit188413_1149 | Two-component system histidine kinase                                                                              |
| Streptococcus mitis  | VBIStrMit169061_0535 | Two-component system histidine kinase                                                                              |
| Streptococcus mitis  | VBIStrMit169061_1766 | Two-component system histidine kinase                                                                              |
| Streptococcus mitis  | VBIStrMit169061_0638 | Two-component system histidine kinase                                                                              |
| Streptococcus mitis  | VBIStrMit169061_0102 | Two-component system histidine kinase                                                                              |
| Streptococcus mitis  | VBIStrMit102292_1745 | Type IV secretion system protein VirD4                                                                             |
| Streptococcus mitis  | VBIStrMit169061_0917 | Tyrosine-protein kinase EpsD EC 2.7.10.2                                                                           |
| Streptococcus mitis  | VBIStrMit102292_1538 | UDP-N-acetylglucosamine 2-epimerase EC 5.1.3.14                                                                    |
| Streptococcus mutans | VBIStrMut209044_0145 | ABC transporter 2C ATP-binding permease protein                                                                    |
| Streptococcus mutans | VBIStrMut210326_0848 | ABC transporter 2C ATP-binding protein                                                                             |
| Streptococcus mutans | VBIStrMut211886_1678 | ABC transporter 2C ATP-binding protein Vex2                                                                        |
| Streptococcus mutans | VBIStrMut212285_0777 | ABC transporter ATP-binding protein                                                                                |
| Streptococcus mutans | VBIStrMut212285_1312 | ABC-type polar amino acid transport system 2C ATPase component                                                     |
| Streptococcus mutans | VBIStrMut211255_0703 | Alcohol dehydrogenase EC 1.1.1.1 3B Acetaldehyde dehydrogenase EC 1.2.1.10                                         |
| Streptococcus mutans | VBIStrMut210326_0440 | Alpha-D-GlcNAc alpha-1 2C2-L-rhamnosyltransferase EC 2.4.1.-                                                       |
| Streptococcus mutans | VBIStrMut211255_1349 | ATP-dependent Clp protease ATP-binding subunit ClpA                                                                |
| Streptococcus mutans | VBIStrMut61772_1199  | Calcium-transporting ATPase EC 3.6.3.8                                                                             |
| Streptococcus mutans | VBIStrMut210326_1152 | Cell wall-associated murein hydrolase LytA                                                                         |
| Streptococcus mutans | VBIStrMut61772_0048  | Choline binding protein A                                                                                          |
| Streptococcus mutans | VBIStrMut249475_0753 | Choline binding protein A                                                                                          |
| Streptococcus mutans | VBIStrMut211886_0415 | Choline binding protein J                                                                                          |
| Streptococcus mutans | VBIStrMut211886_0534 | Choline binding protein J                                                                                          |
| Streptococcus mutans | VBIStrMut211886_0674 | Choline binding protein J                                                                                          |
| Streptococcus mutans | VBIStrMut212285_1702 | Choline kinase EC 2.7.1.32                                                                                         |
| Streptococcus mutans | VBIStrMut212285_0119 | COG1272 Predicted membrane protein hemolysin III homolog                                                           |
| Streptococcus mutans | VBIStrMut209044_0113 | Daunorubicin resistance ATP-binding protein drrA                                                                   |
| Streptococcus mutans | VBIStrMut210794_0650 | Diaminopimelate decarboxylase EC 4.1.1.20                                                                          |
| Streptococcus mutans | VBIStrMut210326_0768 | Exfoliative toxin A                                                                                                |
| Streptococcus mutans | VBIStrMut211886_1146 | Exfoliative toxin A                                                                                                |
| Streptococcus mutans | VBIStrMut209044_0663 | Glutamine synthetase type I EC 6.3.1.2                                                                             |
| Streptococcus mutans | VBIStrMut11111_1663  | hypothetical protein                                                                                               |
| Streptococcus mutans | VBIStrMut210794_0546 | Lipid A export ATP-binding permease protein MsbA                                                                   |
| Streptococcus mutans | VBIStrMut11111_1486  | Lipid A export ATP-binding permease protein MsbA                                                                   |
| Streptococcus mutans | VBIStrMut210326_1344 | Maltose operon transcriptional repressor MalR 2C LacI family                                                       |
| Streptococcus mutans | VBIStrMut11111_1777  | Methionine ABC transporter ATP-binding protein                                                                     |
| Streptococcus mutans | VBIStrMut209044_0876 | Oligopeptide ABC transporter 2C periplasmic oligopeptide-binding protein OppA TC 3.A.1.5.1                         |
| Streptococcus mutans | VBIStrMut249475_0597 | Peptidyl-prolyl cis-trans isomerase EC 5.2.1.8                                                                     |
| Streptococcus mutans | VBIStrMut210326_0699 | Phosphoglucosamine mutase EC 5.4.2.10                                                                              |
| Streptococcus mutans | VBIStrMut211886_1437 | Protein serine threonine phosphatase PrpC 2C regulation of stationary phase                                        |
| Streptococcus mutans | VBIStrMut211886_0305 | putative amino acid ABC transporter 2C ATP-binding protein                                                         |
| Streptococcus mutans | VBIStrMut249475_0341 | Two-component response regulator SA14-24                                                                           |
| Streptococcus mutans | VBIStrMut211886_0100 | UDP-N-acetylglucosamine 4 2C6-dehydratase EC 4.2.1.-                                                               |
| Streptococcus mutans | VBIStrMut211886_0111 | Undecaprenyl pyrophosphate synthetase EC 2.5.1.31                                                                  |
| Streptococcus mutans | VBIStrMut210794_0646 | unknown domain Nucleoside 5-triphosphatase RdgB dHAPT 2C dITP 2C XTP-specific EC 3.6.1.15                          |
| Streptococcus mutans | VBIStrMut11111_1661  | UTP--glucose-1-phosphate uridylyltransferase EC 2.7.7.9                                                            |

Table S8

|                      |                      |                                                                                                          |
|----------------------|----------------------|----------------------------------------------------------------------------------------------------------|
| Streptococcus mutans | VBIStrMut61772_0591  | Zinc metalloprotease zmpB precursor EC 3.4.24.-                                                          |
| Streptococcus oralis | VBIStrOra19579_0227  | 3-isopropylmalate dehydratase small subunit EC 4.2.1.33                                                  |
| Streptococcus oralis | VBIStrOra188715_0985 | 3-isopropylmalate dehydratase small subunit EC 4.2.1.33                                                  |
| Streptococcus oralis | VBIStrOra225564_0983 | 3-oxoacyl-acyl-carrier-protein synthase 2C KASII EC 2.3.1.41                                             |
| Streptococcus oralis | VBIStrOra225564_1449 | 3R-hydroxymyristoyl-acyl carrier protein dehydratase EC 4.2.1.-                                          |
| Streptococcus oralis | VBIStrOra225564_1142 | ABC transporter 2C ATP-binding permease protein                                                          |
| Streptococcus oralis | VBIStrOra220821_1530 | ABC transporter 2C ATP-binding permease protein                                                          |
| Streptococcus oralis | VBIStrOra200525_0670 | ABC transporter 2C ATP-binding permease protein                                                          |
| Streptococcus oralis | VBIStrOra225059_0950 | ABC transporter 2C ATP-binding permease protein                                                          |
| Streptococcus oralis | VBIStrOra225564_0295 | ABC transporter 2C ATP-binding permease protein                                                          |
| Streptococcus oralis | VBIStrOra218827_0718 | ABC transporter 2C ATP-binding permease protein                                                          |
| Streptococcus oralis | VBIStrOra177080_1090 | ABC transporter 2C ATP-binding permease protein                                                          |
| Streptococcus oralis | VBIStrOra225564_0329 | ABC transporter 2C ATP-binding permease protein                                                          |
| Streptococcus oralis | VBIStrOra225564_1052 | ABC transporter 2C ATP-binding permease protein                                                          |
| Streptococcus oralis | VBIStrOra188715_0375 | ABC transporter 2C ATP-binding permease protein                                                          |
| Streptococcus oralis | VBIStrOra238087_1919 | ABC transporter 2C ATP-binding permease protein                                                          |
| Streptococcus oralis | VBIStrOra188715_0831 | ABC transporter 2C ATP-binding protein                                                                   |
| Streptococcus oralis | VBIStrOra225059_1571 | ABC transporter 2C ATP-binding protein EcsA                                                              |
| Streptococcus oralis | VBIStrOra225564_0141 | ABC transporter 2C ATP-binding protein Vex2                                                              |
| Streptococcus oralis | VBIStrOra177080_0395 | ABC transporter 2C ATP-binding protein Vex2                                                              |
| Streptococcus oralis | VBIStrOra225059_0012 | ABC transporter ATP-binding protein                                                                      |
| Streptococcus oralis | VBIStrOra238087_0531 | ABC transporter ATP-binding protein                                                                      |
| Streptococcus oralis | VBIStrOra19579_0079  | ABC transporter ATP-binding protein YvcR                                                                 |
| Streptococcus oralis | VBIStrOra225564_0966 | ABC-type multidrug transport system 2C ATPase component                                                  |
| Streptococcus oralis | VBIStrOra238087_0530 | ABC-type multidrug transport system 2C ATPase component                                                  |
| Streptococcus oralis | VBIStrOra225059_1271 | ABC-type polar amino acid transport system 2C ATPase component                                           |
| Streptococcus oralis | VBIStrOra218827_0682 | Acetoin dehydrogenase E1 component beta-subunit EC 1.2.4.-                                               |
| Streptococcus oralis | VBIStrOra225059_0899 | Acetoin dehydrogenase E1 component beta-subunit EC 1.2.4.-                                               |
| Streptococcus oralis | VBIStrOra218827_0724 | Acetylornithine aminotransferase EC 2.6.1.11                                                             |
| Streptococcus oralis | VBIStrOra220821_0289 | Acetylornithine aminotransferase EC 2.6.1.11                                                             |
| Streptococcus oralis | VBIStrOra218827_1629 | Acetylornithine aminotransferase EC 2.6.1.11                                                             |
| Streptococcus oralis | VBIStrOra218827_0695 | Alcohol dehydrogenase EC 1.1.1.1 3B Acetaldehyde dehydrogenase EC 1.2.1.10                               |
| Streptococcus oralis | VBIStrOra218827_1153 | Alcohol dehydrogenase EC 1.1.1.1 3B Acetaldehyde dehydrogenase EC 1.2.1.10                               |
| Streptococcus oralis | VBIStrOra19579_1565  | Alcohol dehydrogenase EC 1.1.1.1 3B Acetaldehyde dehydrogenase EC 1.2.1.10                               |
| Streptococcus oralis | VBIStrOra218827_0476 | Alpha-L-Rha alpha-1 2C2-L-rhamnosyltransferase alpha-L-Rha alpha-1 2C3-L-rhamnosyltransferase EC 2.4.1.- |
| Streptococcus oralis | VBIStrOra218827_0618 | Alpha-L-Rha alpha-1 2C2-L-rhamnosyltransferase alpha-L-Rha alpha-1 2C3-L-rhamnosyltransferase EC 2.4.1.- |
| Streptococcus oralis | VBIStrOra218827_1683 | Alpha-L-Rha alpha-1 2C2-L-rhamnosyltransferase alpha-L-Rha alpha-1 2C3-L-rhamnosyltransferase EC 2.4.1.- |
| Streptococcus oralis | VBIStrOra218827_0823 | Alpha-L-Rha alpha-1 2C2-L-rhamnosyltransferase alpha-L-Rha alpha-1 2C3-L-rhamnosyltransferase EC 2.4.1.- |
| Streptococcus oralis | VBIStrOra200525_1510 | Alpha-L-Rha alpha-1 2C3-L-rhamnosyltransferase EC 2.4.1.-                                                |
| Streptococcus oralis | VBIStrOra218827_0059 | Alpha-L-Rha alpha-1 2C3-L-rhamnosyltransferase EC 2.4.1.-                                                |
| Streptococcus oralis | VBIStrOra225564_0408 | Amino acid transport ATP-binding protein                                                                 |
| Streptococcus oralis | VBIStrOra19579_0060  | Anthranilate phosphoribosyltransferase EC 2.4.2.18                                                       |
| Streptococcus oralis | VBIStrOra200525_0943 | Anthranilate synthase 2C aminase component EC 4.1.3.27                                                   |
| Streptococcus oralis | VBIStrOra177080_1367 | ATP synthase alpha chain EC 3.6.3.14                                                                     |
| Streptococcus oralis | VBIStrOra188715_0284 | ATP synthase alpha chain EC 3.6.3.14                                                                     |
| Streptococcus oralis | VBIStrOra225059_1098 | ATP-dependent Clp protease 2C ATP-binding subunit ClpE                                                   |
| Streptococcus oralis | VBIStrOra177080_1235 | ATP-dependent Clp protease 2C ATP-binding subunit ClpE                                                   |
| Streptococcus oralis | VBIStrOra225059_1237 | ATP-dependent Clp protease ATP-binding subunit ClpA                                                      |
| Streptococcus oralis | VBIStrOra19579_0196  | Beta-1 2C3-glucosyltransferase                                                                           |
| Streptococcus oralis | VBIStrOra218827_0708 | C3-degrading proteinase                                                                                  |
| Streptococcus oralis | VBIStrOra188715_1005 | Cadmium-transporting ATPase EC 3.6.3.3                                                                   |
| Streptococcus oralis | VBIStrOra225059_1204 | Candidate zinc-binding lipoprotein ZinT                                                                  |
| Streptococcus oralis | VBIStrOra225564_1572 | Cell division transporter 2C ATP-binding protein FtsE TC 3.A.5.1.1                                       |
| Streptococcus oralis | VBIStrOra225564_0493 | Cell envelope-associated transcriptional attenuator LytR-CpsA-Psr 2C subfamily F2 as in PMID19099556     |
| Streptococcus oralis | VBIStrOra188715_1259 | Choline binding protein J                                                                                |
| Streptococcus oralis | VBIStrOra177080_0213 | Choline binding protein J                                                                                |
| Streptococcus oralis | VBIStrOra177080_1379 | Choline binding protein J                                                                                |
| Streptococcus oralis | VBIStrOra177080_0123 | Choline binding protein J                                                                                |
| Streptococcus oralis | VBIStrOra177080_1517 | Choline binding protein J                                                                                |
| Streptococcus oralis | VBIStrOra225564_0292 | Cholinephosphate cytidyltransferase EC 2.7.7.15                                                          |
| Streptococcus oralis | VBIStrOra238087_0376 | COG1272 Predicted membrane protein hemolysin III homolog                                                 |
| Streptococcus oralis | VBIStrOra177080_0511 | Cysteine and methionine metabolism regulator CmbR 2C LysR family                                         |
| Streptococcus oralis | VBIStrOra225564_0933 | D-alanine-polyphosphoribitol ligase subunit 1 EC 6.1.1.13                                                |
| Streptococcus oralis | VBIStrOra225564_1548 | Daunorubicin resistance ATP-binding protein drrA                                                         |
| Streptococcus oralis | VBIStrOra188715_0753 | Daunorubicin resistance ATP-binding protein drrA                                                         |
| Streptococcus oralis | VBIStrOra19579_0144  | Daunorubicin resistance ATP-binding protein drrA                                                         |
| Streptococcus oralis | VBIStrOra220821_1207 | Diaminopimelate decarboxylase EC 4.1.1.20                                                                |
| Streptococcus oralis | VBIStrOra225564_1353 | Diaminopimelate decarboxylase EC 4.1.1.20                                                                |
| Streptococcus oralis | VBIStrOra225059_0897 | DNA-binding response regulator                                                                           |
| Streptococcus oralis | VBIStrOra225059_1766 | dTDP-4-dehydrorhamnose reductase EC 1.1.1.133                                                            |
| Streptococcus oralis | VBIStrOra220821_1372 | ESAT-6 Esx family secreted protein EsxA Yuke                                                             |
| Streptococcus oralis | VBIStrOra188715_1549 | Exfoliative toxin A                                                                                      |
| Streptococcus oralis | VBIStrOra188715_0142 | Exfoliative toxin A                                                                                      |
| Streptococcus oralis | VBIStrOra188715_1602 | Fibronectin fibrinogen-binding protein                                                                   |
| Streptococcus oralis | VBIStrOra225564_0156 | Fibronectin fibrinogen-binding protein                                                                   |
| Streptococcus oralis | VBIStrOra238087_0637 | Fibronectin fibrinogen-binding protein                                                                   |
| Streptococcus oralis | VBIStrOra218827_1685 | FIG01116088 hypothetical protein                                                                         |
| Streptococcus oralis | VBIStrOra225059_0251 | Glucosyltransferase GtfG                                                                                 |
| Streptococcus oralis | VBIStrOra225564_0145 | Glucosyltransferase GtfG                                                                                 |

Table S8

|                      |                      |                                                                                    |
|----------------------|----------------------|------------------------------------------------------------------------------------|
| Streptococcus oralis | VBIStrOra225564_1727 | Glutamate transport ATP-binding protein                                            |
| Streptococcus oralis | VBIStrOra177080_1310 | Glutamate transport ATP-binding protein                                            |
| Streptococcus oralis | VBIStrOra177080_0266 | Glutamate transport ATP-binding protein                                            |
| Streptococcus oralis | VBIStrOra225059_0524 | Glutamate transport ATP-binding protein                                            |
| Streptococcus oralis | VBIStrOra19579_0077  | Glutamine ABC transporter 2C periplasmic glutamine-binding protein TC 3.A.1.3.2    |
| Streptococcus oralis | VBIStrOra188715_0848 | Glutamine synthetase type I EC 6.3.1.2                                             |
| Streptococcus oralis | VBIStrOra19579_0386  | Glutamine synthetase type I EC 6.3.1.2                                             |
| Streptococcus oralis | VBIStrOra218827_1121 | Glycosyl transferase 2C family 2                                                   |
| Streptococcus oralis | VBIStrOra220821_1606 | Glycosyltransferase                                                                |
| Streptococcus oralis | VBIStrOra177080_0708 | glycosyltransferase family 2 protein                                               |
| Streptococcus oralis | VBIStrOra218827_1485 | GTP pyrophosphokinase EC 2.7.6.5 2C pppGpp synthetase I                            |
| Streptococcus oralis | VBIStrOra225564_0140 | GTP pyrophosphokinase EC 2.7.6.5 2C pppGpp synthetase I                            |
| Streptococcus oralis | VBIStrOra225059_1103 | Heat shock protein 60 family chaperone GroEL                                       |
| Streptococcus oralis | VBIStrOra225059_1419 | hypothetical protein                                                               |
| Streptococcus oralis | VBIStrOra225059_1414 | hypothetical protein                                                               |
| Streptococcus oralis | VBIStrOra225564_0294 | IgA1 protease EC 3.4.24.13                                                         |
| Streptococcus oralis | VBIStrOra225564_0406 | Iron compound ABC uptake transporter permease protein PiuC                         |
| Streptococcus oralis | VBIStrOra225059_1283 | Iron compound ABC uptake transporter substrate-binding protein PiuA                |
| Streptococcus oralis | VBIStrOra225564_0939 | Iron compound ABC uptake transporter substrate-binding protein PiuA                |
| Streptococcus oralis | VBIStrOra200525_1706 | Iron compound ABC uptake transporter substrate-binding protein PiuA                |
| Streptococcus oralis | VBIStrOra188715_1822 | L-proline glycine betaine ABC transport system permease protein ProV TC 3.A.1.12.1 |
| Streptococcus oralis | VBIStrOra220821_1830 | Laminin-binding surface protein                                                    |
| Streptococcus oralis | VBIStrOra225059_1278 | Late competence protein ComGA 2C access of DNA to ComEA                            |
| Streptococcus oralis | VBIStrOra220821_1193 | Lipid A export ATP-binding permease protein MsbA                                   |
| Streptococcus oralis | VBIStrOra225564_1336 | Lipid A export ATP-binding permease protein MsbA                                   |
| Streptococcus oralis | VBIStrOra225059_0986 | Lipid A export ATP-binding permease protein MsbA                                   |
| Streptococcus oralis | VBIStrOra225564_1319 | Lipid A export ATP-binding permease protein MsbA                                   |
| Streptococcus oralis | VBIStrOra200525_1566 | Lipid A export ATP-binding permease protein MsbA                                   |
| Streptococcus oralis | VBIStrOra19579_0522  | Long-chain-fatty-acid--CoA ligase EC 6.2.1.3                                       |
| Streptococcus oralis | VBIStrOra220821_0307 | Long-chain-fatty-acid--CoA ligase EC 6.2.1.3                                       |
| Streptococcus oralis | VBIStrOra220821_0417 | Long-chain-fatty-acid--CoA ligase EC 6.2.1.3                                       |
| Streptococcus oralis | VBIStrOra220821_1156 | Long-chain-fatty-acid--CoA ligase EC 6.2.1.3                                       |
| Streptococcus oralis | VBIStrOra19579_0791  | Long-chain-fatty-acid--CoA ligase EC 6.2.1.3                                       |
| Streptococcus oralis | VBIStrOra19579_1364  | Long-chain-fatty-acid--CoA ligase EC 6.2.1.3                                       |
| Streptococcus oralis | VBIStrOra220821_0761 | Long-chain-fatty-acid--CoA ligase EC 6.2.1.3                                       |
| Streptococcus oralis | VBIStrOra19579_1322  | Long-chain-fatty-acid--CoA ligase EC 6.2.1.3                                       |
| Streptococcus oralis | VBIStrOra19579_0606  | Long-chain-fatty-acid--CoA ligase EC 6.2.1.3                                       |
| Streptococcus oralis | VBIStrOra19579_1190  | Long-chain-fatty-acid--CoA ligase EC 6.2.1.3                                       |
| Streptococcus oralis | VBIStrOra220821_0725 | Long-chain-fatty-acid--CoA ligase EC 6.2.1.3                                       |
| Streptococcus oralis | VBIStrOra19579_1189  | Long-chain-fatty-acid--CoA ligase EC 6.2.1.3                                       |
| Streptococcus oralis | VBIStrOra19579_1397  | Long-chain-fatty-acid--CoA ligase EC 6.2.1.3                                       |
| Streptococcus oralis | VBIStrOra220821_0523 | Long-chain-fatty-acid--CoA ligase EC 6.2.1.3                                       |
| Streptococcus oralis | VBIStrOra220821_0486 | Long-chain-fatty-acid--CoA ligase EC 6.2.1.3                                       |
| Streptococcus oralis | VBIStrOra220821_0466 | Long-chain-fatty-acid--CoA ligase EC 6.2.1.3                                       |
| Streptococcus oralis | VBIStrOra177080_0554 | Malonyl CoA-acyl carrier protein transacylase EC 2.3.1.39                          |
| Streptococcus oralis | VBIStrOra225059_1787 | Malonyl CoA-acyl carrier protein transacylase EC 2.3.1.39                          |
| Streptococcus oralis | VBIStrOra19579_1624  | Manganese ABC transporter 2C periplasmic-binding protein SitA                      |
| Streptococcus oralis | VBIStrOra220821_1710 | Manganese superoxide dismutase EC 1.15.1.1                                         |
| Streptococcus oralis | VBIStrOra225059_1592 | Manganese-dependent protein-tyrosine phosphatase EC 3.1.3.48                       |
| Streptococcus oralis | VBIStrOra177080_0262 | Mannose-6-phosphate isomerase EC 5.3.1.8                                           |
| Streptococcus oralis | VBIStrOra225564_1563 | Mannose-6-phosphate isomerase EC 5.3.1.8                                           |
| Streptococcus oralis | VBIStrOra177080_0975 | Mannose-6-phosphate isomerase EC 5.3.1.8                                           |
| Streptococcus oralis | VBIStrOra225059_0774 | Mg <sup>2+</sup> transport ATPase 2C P-type EC 3.6.3.2                             |
| Streptococcus oralis | VBIStrOra218827_1389 | Multiple sugar ABC transporter 2C ATP-binding protein                              |
| Streptococcus oralis | VBIStrOra200525_2013 | Multiple sugar ABC transporter 2C ATP-binding protein                              |
| Streptococcus oralis | VBIStrOra218827_0663 | Multiple sugar ABC transporter 2C ATP-binding protein                              |
| Streptococcus oralis | VBIStrOra225059_0276 | N-acetylmuramoyl-L-alanine amidase EC 3.5.1.28                                     |
| Streptococcus oralis | VBIStrOra225059_0275 | N-acetylmuramoyl-L-alanine amidase EC 3.5.1.28                                     |
| Streptococcus oralis | VBIStrOra225059_0405 | N-acetylmuramoyl-L-alanine amidase EC 3.5.1.28                                     |
| Streptococcus oralis | VBIStrOra225059_0321 | N-acetylmuramoyl-L-alanine amidase EC 3.5.1.28                                     |
| Streptococcus oralis | VBIStrOra218827_1486 | NAD-dependent glyceraldehyde-3-phosphate dehydrogenase EC 1.2.1.12                 |
| Streptococcus oralis | VBIStrOra177080_1229 | Oligopeptide transport ATP-binding protein OppF TC 3.A.1.5.1                       |
| Streptococcus oralis | VBIStrOra225059_1591 | Oligopeptide transport ATP-binding protein OppF TC 3.A.1.5.1                       |
| Streptococcus oralis | VBIStrOra220821_1819 | Peptidyl-prolyl cis-trans isomerase EC 5.2.1.8                                     |
| Streptococcus oralis | VBIStrOra218827_1034 | Phosphatidate cytidyltransferase EC 2.7.7.41                                       |
| Streptococcus oralis | VBIStrOra238087_0944 | Phosphoglucosyltransferase EC 5.4.2.2                                              |
| Streptococcus oralis | VBIStrOra225564_0082 | Protein serine threonine phosphatase PrpC 2C regulation of stationary phase        |
| Streptococcus oralis | VBIStrOra200525_2014 | putative autolysin 3B amidase                                                      |
| Streptococcus oralis | VBIStrOra200525_1707 | putative bacitracin synthetase                                                     |
| Streptococcus oralis | VBIStrOra200525_1949 | putative bacitracin synthetase                                                     |
| Streptococcus oralis | VBIStrOra220821_1416 | Putative secretion system component EssB YukC                                      |
| Streptococcus oralis | VBIStrOra218827_1154 | Regulation of D-alanyl-lipoteichoic acid biosynthesis 2C DltR                      |
| Streptococcus oralis | VBIStrOra225059_0731 | Response regulator CsrR                                                            |
| Streptococcus oralis | VBIStrOra188715_1677 | RNA polymerase sigma factor RpoD                                                   |
| Streptococcus oralis | VBIStrOra200525_0116 | RNA polymerase sigma factor RpoD                                                   |
| Streptococcus oralis | VBIStrOra225059_0160 | Serine endopeptidase ScpC EC 3.4.21.-                                              |
| Streptococcus oralis | VBIStrOra225564_1798 | Serine endopeptidase ScpC EC 3.4.21.-                                              |
| Streptococcus oralis | VBIStrOra225564_0938 | Serine protease 2C DegP HtrA 2C do-like EC 3.4.21.-                                |
| Streptococcus oralis | VBIStrOra177080_1675 | Sialidase EC 3.2.1.18                                                              |

Table S8

|                             |                      |                                                                                           |
|-----------------------------|----------------------|-------------------------------------------------------------------------------------------|
| Streptococcus oralis        | VBIStrOra220821_1854 | signal transduction histidine kinase                                                      |
| Streptococcus oralis        | VBIStrOra225564_1022 | Streptococcal lipoprotein rotamase A 3B Peptidyl-prolyl cis-trans isomerase EC 5.2.1.8    |
| Streptococcus oralis        | VBIStrOra19579_0472  | Two component transcriptional regulator VraR                                              |
| Streptococcus oralis        | VBIStrOra177080_1035 | Two-component response regulator                                                          |
| Streptococcus oralis        | VBIStrOra225059_0635 | Two-component response regulator BceR                                                     |
| Streptococcus oralis        | VBIStrOra225564_1150 | Two-component sensor kinase SA14-24                                                       |
| Streptococcus oralis        | VBIStrOra225059_0588 | Two-component system histidine kinase                                                     |
| Streptococcus oralis        | VBIStrOra225059_1726 | Tyrosine-protein kinase EpsD EC 2.7.10.2                                                  |
| Streptococcus oralis        | VBIStrOra238087_1136 | UDP-N-acetylenolpyruvoylglucosamine reductase EC 1.1.1.158                                |
| Streptococcus oralis        | VBIStrOra218827_0833 | UDP-N-acetylglucosamine 2-epimerase EC 5.1.3.14                                           |
| Streptococcus oralis        | VBIStrOra177080_0702 | unknown domain Nucleoside 5-triphosphatase RdgB dHATP 2C dITP 2C XTP-specific EC 3.6.1.15 |
| Streptococcus oralis        | VBIStrOra19579_0094  | Vitamin B12 ABC transporter 2C ATPase component BtuD                                      |
| Streptococcus oralis        | VBIStrOra225564_1010 | Vitamin B12 ABC transporter 2C ATPase component BtuD                                      |
| Streptococcus oralis        | VBIStrOra19579_0298  | Vitamin B12 ABC transporter 2C permease component BtuC                                    |
| Streptococcus oralis        | VBIStrOra177080_1378 | Vitamin B12 ABC transporter 2C permease component BtuC                                    |
| Streptococcus oralis        | VBIStrOra220821_1600 | Zinc metalloprotease zmpB precursor EC 3.4.24.-                                           |
| Streptococcus parasanguinis | VBIStrPar161236_1400 | ABC transporter 2C ATP-binding permease protein                                           |
| Streptococcus parasanguinis | VBIStrPar169762_0778 | Choline binding protein D                                                                 |
| Streptococcus parasanguinis | VBIStrPar169762_0949 | Lipid A export ATP-binding permease protein MsbA                                          |
| Streptococcus peroris       | VBIStrPer170951_1346 | ABC transporter 2C ATP-binding permease protein                                           |
| Streptococcus peroris       | VBIStrPer170951_1284 | ATP-dependent Clp protease ATP-binding subunit ClpA                                       |
| Streptococcus peroris       | VBIStrPer170951_0797 | Candidate zinc-binding lipoprotein ZinT                                                   |
| Streptococcus peroris       | VBIStrPer170951_0335 | Iron compound ABC uptake transporter permease protein PiuC                                |
| Streptococcus peroris       | VBIStrPer170951_0271 | Iron compound ABC uptake transporter substrate-binding protein PiuA                       |
| Streptococcus peroris       | VBIStrPer170951_0144 | Late competence protein ComGA 2C access of DNA to ComEA                                   |
| Streptococcus peroris       | VBIStrPer170951_0097 | Lipid A export ATP-binding permease protein MsbA                                          |
| Streptococcus peroris       | VBIStrPer170951_0577 | Lipid A export ATP-binding permease protein MsbA                                          |
| Streptococcus peroris       | VBIStrPer170951_0796 | Methionine ABC transporter ATP-binding protein                                            |
| Streptococcus peroris       | VBIStrPer170951_1413 | Phosphate transport ATP-binding protein PstB TC 3.A.1.7.1                                 |
| Streptococcus peroris       | VBIStrPer170951_0742 | putative amino acid ABC transporter 2C ATP-binding protein                                |
| Streptococcus pneumoniae    | VBIStrPne54539_0880  | ABC-type polar amino acid transport system 2C ATPase component                            |
| Streptococcus pneumoniae    | VBIStrPne54539_0619  | Acetoin dehydrogenase E1 component beta-subunit EC 1.2.4.-                                |
| Streptococcus pneumoniae    | VBIStrPne54539_1172  | ATP-dependent Clp protease ATP-binding subunit ClpA                                       |
| Streptococcus pneumoniae    | VBIStrPne101635_2152 | Calcium-transporting ATPase EC 3.6.3.8                                                    |
| Streptococcus pneumoniae    | VBIStrPne44485_1420  | Choline binding protein A                                                                 |
| Streptococcus pneumoniae    | VBIStrPne101635_0811 | Diaminopimelate decarboxylase EC 4.1.1.20                                                 |
| Streptococcus pneumoniae    | VBIStrPne101635_1107 | Exfoliative toxin A                                                                       |
| Streptococcus pneumoniae    | VBIStrPne101635_0225 | FtsK SpoIIIE family protein 2C putative secretion system component EssC YukA              |
| Streptococcus pneumoniae    | VBIStrPne101635_1954 | Glucosyltransferase GtfG                                                                  |
| Streptococcus pneumoniae    | VBIStrPne101635_0870 | Group B streptococcal surface immunogenic protein                                         |
| Streptococcus pneumoniae    | VBIStrPne101635_0529 | Hemolysins and related proteins containing CBS domains                                    |
| Streptococcus pneumoniae    | VBIStrPne101635_1139 | hypothetical protein                                                                      |
| Streptococcus pneumoniae    | VBIStrPne44485_1451  | Iron compound ABC uptake transporter ATP-binding protein PiuD                             |
| Streptococcus pneumoniae    | VBIStrPne44485_1052  | Late competence protein ComGA 2C access of DNA to ComEA                                   |
| Streptococcus pneumoniae    | VBIStrPne54539_0464  | Lipid A export ATP-binding permease protein MsbA                                          |
| Streptococcus pneumoniae    | VBIStrPne44485_1626  | Lipid A export ATP-binding permease protein MsbA                                          |
| Streptococcus pneumoniae    | VBIStrPne54539_0849  | NPQTN specific sortase B                                                                  |
| Streptococcus pneumoniae    | VBIStrPne44485_0203  | Phosphoglucosamine mutase EC 5.4.2.10                                                     |
| Streptococcus pneumoniae    | VBIStrPne101635_1271 | Serine endopeptidase ScpC EC 3.4.21.-                                                     |
| Streptococcus pneumoniae    | VBIStrPne101635_1966 | Serine threonine protein kinase PrkC 2C regulator of stationary phase                     |
| Streptococcus pneumoniae    | VBIStrPne54539_0581  | Sortase A 2C LPXTG specific                                                               |
| Streptococcus pneumoniae    | VBIStrPne54539_0509  | Two-component sensor kinase SA14-24                                                       |
| Streptococcus pneumoniae    | VBIStrPne44485_0655  | Vitamin B12 ABC transporter 2C permease component BtuC                                    |
| Streptococcus pyogenes      | VBIStrPyo41662_0455  | Alpha-D-GlcNAc alpha-1 2C2-L-rhamnosyltransferase EC 2.4.1.-                              |
| Streptococcus pyogenes      | VBIStrPyo169116_0085 | Bactoprenol glucosyl transferase EC 2.4.1.-                                               |
| Streptococcus pyogenes      | VBIStrPyo169116_1091 | Candidate zinc-binding lipoprotein ZinT                                                   |
| Streptococcus pyogenes      | VBIStrPyo41662_0099  | COG1272 Predicted membrane protein hemolysin III homolog                                  |
| Streptococcus pyogenes      | VBIStrPyo41662_0921  | dTDP-4-dehydrorhamnose reductase EC 1.1.1.133                                             |
| Streptococcus pyogenes      | VBIStrPyo79812_1768  | GTP pyrophosphokinase EC 2.7.6.5 2C pppGpp synthetase I                                   |
| Streptococcus pyogenes      | VBIStrPyo169116_1548 | Lactaldehyde dehydrogenase involved in fucose or rhamnose utilization EC 1.2.1.22         |
| Streptococcus pyogenes      | VBIStrPyo79812_0804  | Lipid A export ATP-binding permease protein MsbA                                          |
| Streptococcus pyogenes      | VBIStrPyo41662_0073  | Lipid carrier UDP-N-acetylgalactosaminyltransferase EC 2.4.1.-                            |
| Streptococcus pyogenes      | VBIStrPyo41662_0989  | Manganese ABC transporter 2C ATP-binding protein SitB                                     |
| Streptococcus pyogenes      | VBIStrPyo169116_1244 | Methionine ABC transporter ATP-binding protein                                            |
| Streptococcus pyogenes      | VBIStrPyo41662_0161  | Putative hemagglutinin hemolysin-related protein                                          |
| Streptococcus pyogenes      | VBIStrPyo79812_0501  | Putative secretion system component EssB YukC                                             |
| Streptococcus pyogenes      | VBIStrPyo79812_0738  | Pyrroline-5-carboxylate reductase EC 1.5.1.2                                              |
| Streptococcus pyogenes      | VBIStrPyo41662_1124  | Serine endopeptidase ScpC EC 3.4.21.-                                                     |
| Streptococcus pyogenes      | VBIStrPyo79812_1225  | Two-component response regulator                                                          |
| Streptococcus pyogenes      | VBIStrPyo79812_0940  | Two-component response regulator VncR                                                     |
| Streptococcus pyogenes      | VBIStrPyo41662_1028  | Two-component system histidine kinase                                                     |
| Streptococcus pyogenes      | VBIStrPyo79812_1006  | Two-component system histidine kinase                                                     |
| Streptococcus pyogenes      | VBIStrPyo41662_0912  | UDP-galactopyranose mutase EC 5.4.99.9                                                    |
| Streptococcus pyogenes      | VBIStrPyo79812_0646  | UDP-N-acetylenolpyruvoylglucosamine reductase EC 1.1.1.158                                |
| Streptococcus pyogenes      | VBIStrPyo79812_0261  | UDP-N-acetylglucosamine 2-epimerase EC 5.1.3.14                                           |
| Streptococcus pyogenes      | VBIStrPyo79812_1722  | Uncharacterized conserved phage related protein                                           |
| Streptococcus pyogenes      | VBIStrPyo79812_1395  | Uncharacterized conserved phage related protein                                           |
| Streptococcus pyogenes      | VBIStrPyo169116_0928 | Zinc ABC transporter 2C ATP-binding protein ZnuC                                          |
| Streptococcus salivarius    | VBIStrSal205187_1786 | 3-isopropylmalate dehydratase small subunit EC 4.2.1.33                                   |

Table S8

|                          |                      |                                                                                                                    |
|--------------------------|----------------------|--------------------------------------------------------------------------------------------------------------------|
| Streptococcus salivarius | VBIStrSal237731_1004 | 3-oxoacyl-acyl-carrier-protein synthase 2C KASII EC 2.3.1.41                                                       |
| Streptococcus salivarius | VBIStrSal202804_0581 | ABC transporter 2C ATP-binding permease protein                                                                    |
| Streptococcus salivarius | VBIStrSal205187_0380 | ABC transporter ATP-binding protein                                                                                |
| Streptococcus salivarius | VBIStrSal202804_0234 | Anthranilate synthase 2C aminase component EC 4.1.3.27                                                             |
| Streptococcus salivarius | VBIStrSal205187_1437 | ATP-dependent Clp protease ATP-binding subunit ClpA                                                                |
| Streptococcus salivarius | VBIStrSal241071_0255 | Catabolite control protein A                                                                                       |
| Streptococcus salivarius | VBIStrSal202804_1419 | Choline kinase EC 2.7.1.32                                                                                         |
| Streptococcus salivarius | VBIStrSal117533_0985 | dTDP-4-dehydrorhamnose 3 2C5-epimerase EC 5.1.3.13                                                                 |
| Streptococcus salivarius | VBIStrSal117533_0405 | dTDP-4-dehydrorhamnose reductase EC 1.1.1.133                                                                      |
| Streptococcus salivarius | VBIStrSal51046_0257  | Enolase EC 4.2.1.11                                                                                                |
| Streptococcus salivarius | VBIStrSal205187_0146 | Fibronectin fibrinogen-binding protein                                                                             |
| Streptococcus salivarius | VBIStrSal117533_1212 | Glucose-1-phosphate thymidyltransferase EC 2.7.7.24                                                                |
| Streptococcus salivarius | VBIStrSal51046_0411  | Histidine kinase                                                                                                   |
| Streptococcus salivarius | VBIStrSal237731_1214 | Lipid A export ATP-binding permease protein MsbA                                                                   |
| Streptococcus salivarius | VBIStrSal237731_1063 | Lipid A export ATP-binding permease protein MsbA                                                                   |
| Streptococcus salivarius | VBIStrSal237731_0910 | Lipid A export ATP-binding permease protein MsbA                                                                   |
| Streptococcus salivarius | VBIStrSal237731_1572 | Manganese superoxide dismutase EC 1.15.1.1                                                                         |
| Streptococcus salivarius | VBIStrSal237731_0019 | Methionine ABC transporter ATP-binding protein                                                                     |
| Streptococcus salivarius | VBIStrSal51046_0855  | Mg <sup>2+</sup> transport ATPase 2C P-type EC 3.6.3.2                                                             |
| Streptococcus salivarius | VBIStrSal117533_1319 | Oligopeptide transport ATP-binding protein OppD TC 3.A.1.5.1                                                       |
| Streptococcus salivarius | VBIStrSal202804_0755 | Phosphate transport ATP-binding protein PstB TC 3.A.1.7.1                                                          |
| Streptococcus salivarius | VBIStrSal205187_1620 | Phosphoglucomutase EC 5.4.2.2                                                                                      |
| Streptococcus salivarius | VBIStrSal205187_1146 | putative amino acid ABC transporter 2C ATP-binding protein                                                         |
| Streptococcus salivarius | VBIStrSal202804_1119 | Putative coproporphyrinogen III oxidase of BS HemN-type 2C oxygen-independent EC 1.3.99.22 2C in heat shock gene c |
| Streptococcus salivarius | VBIStrSal216060_0222 | RNA binding methyltransferase FtsJ like                                                                            |
| Streptococcus salivarius | VBIStrSal216060_1072 | Sortase A 2C LPXTG specific                                                                                        |
| Streptococcus salivarius | VBIStrSal51046_0041  | Streptococcal lipoprotein rotamase A 3B Peptidyl-prolyl cis-trans isomerase EC 5.2.1.8                             |
| Streptococcus salivarius | VBIStrSal237731_1321 | Two component system histidine kinase EC 2.7.3.-                                                                   |
| Streptococcus sobrinus   | VBIStrSob206829_0651 | 3R-hydroxymyristoyl-acyl carrier protein dehydratase EC 4.2.1.-                                                    |
| Streptococcus sobrinus   | VBIStrSob212168_1058 | Acetoin dehydrogenase E1 component beta-subunit EC 1.2.4.-                                                         |
| Streptococcus sobrinus   | VBIStrSob213128_0751 | Alpha-L-Rha alpha-1 2C2-L-rhamnosyltransferase alpha-L-Rha alpha-1 2C3-L-rhamnosyltransferase EC 2.4.1.-           |
| Streptococcus sobrinus   | VBIStrSob206829_0103 | Anthranilate synthase 2C aminase component EC 4.1.3.27                                                             |
| Streptococcus sobrinus   | VBIStrSob214544_1041 | ATP synthase alpha chain EC 3.6.3.14                                                                               |
| Streptococcus sobrinus   | VBIStrSob212630_0684 | ATP synthase alpha chain EC 3.6.3.14                                                                               |
| Streptococcus sobrinus   | VBIStrSob212630_1418 | ATP-dependent Clp protease ATP-binding subunit ClpA                                                                |
| Streptococcus sobrinus   | VBIStrSob212630_1838 | ATP-dependent Clp protease ATP-binding subunit ClpA                                                                |
| Streptococcus sobrinus   | VBIStrSob205529_1088 | Beta-1 2C3-glucosyltransferase                                                                                     |
| Streptococcus sobrinus   | VBIStrSob212630_1153 | Calcium-transporting ATPase EC 3.6.3.8                                                                             |
| Streptococcus sobrinus   | VBIStrSob206829_1688 | Capsular polysaccharide synthesis protein                                                                          |
| Streptococcus sobrinus   | VBIStrSob209984_0321 | Cation-transporting ATPase 2C E1-E2 family                                                                         |
| Streptococcus sobrinus   | VBIStrSob212168_0098 | Cell division trigger factor EC 5.2.1.8                                                                            |
| Streptococcus sobrinus   | VBIStrSob212168_0371 | Cell wall surface anchor family protein                                                                            |
| Streptococcus sobrinus   | VBIStrSob215200_0184 | Choline binding protein A                                                                                          |
| Streptococcus sobrinus   | VBIStrSob215046_1587 | Choline binding protein A                                                                                          |
| Streptococcus sobrinus   | VBIStrSob215200_0228 | Choline binding protein A                                                                                          |
| Streptococcus sobrinus   | VBIStrSob215046_1437 | Choline binding protein A                                                                                          |
| Streptococcus sobrinus   | VBIStrSob215046_0949 | Choline binding protein A                                                                                          |
| Streptococcus sobrinus   | VBIStrSob215046_1906 | Choline binding protein A                                                                                          |
| Streptococcus sobrinus   | VBIStrSob215046_1082 | Choline binding protein A                                                                                          |
| Streptococcus sobrinus   | VBIStrSob212168_1018 | COG1272 Predicted membrane protein hemolysin III homolog                                                           |
| Streptococcus sobrinus   | VBIStrSob206829_1207 | D-alanine-polyphosphoribitol ligase subunit 1 EC 6.1.1.13                                                          |
| Streptococcus sobrinus   | VBIStrSob213128_1022 | D-beta-hydroxybutyrate dehydrogenase EC 1.1.1.30                                                                   |
| Streptococcus sobrinus   | VBIStrSob212630_0613 | dTDP-4-dehydrorhamnose 3 2C5-epimerase EC 5.1.3.13                                                                 |
| Streptococcus sobrinus   | VBIStrSob212168_0021 | dTDP-glucose 4 2C6-dehydratase EC 4.2.1.46                                                                         |
| Streptococcus sobrinus   | VBIStrSob209984_0555 | Fibronectin fibrinogen-binding protein                                                                             |
| Streptococcus sobrinus   | VBIStrSob213128_0576 | Fibronectin-binding protein                                                                                        |
| Streptococcus sobrinus   | VBIStrSob214729_0537 | Glucose-1-phosphate thymidyltransferase EC 2.7.7.24                                                                |
| Streptococcus sobrinus   | VBIStrSob214544_0523 | Glucose-1-phosphate thymidyltransferase EC 2.7.7.24                                                                |
| Streptococcus sobrinus   | VBIStrSob212168_1322 | Glutamine synthetase type I EC 6.3.1.2                                                                             |
| Streptococcus sobrinus   | VBIStrSob212168_0391 | Glutamine synthetase type I EC 6.3.1.2                                                                             |
| Streptococcus sobrinus   | VBIStrSob214729_5804 | GTP pyrophosphokinase EC 2.7.6.5 2C pppGpp synthetase I                                                            |
| Streptococcus sobrinus   | VBIStrSob213277_1782 | Heat shock protein 60 family chaperone GroEL                                                                       |
| Streptococcus sobrinus   | VBIStrSob214729_4033 | Hyaluronoglucosaminidase EC 3.2.1.35                                                                               |
| Streptococcus sobrinus   | VBIStrSob213128_1333 | Hyaluronoglucosaminidase EC 3.2.1.35                                                                               |
| Streptococcus sobrinus   | VBIStrSob213128_0382 | Immunoglobulin G-endopeptidase IdeS Mac Secreted immunoglobulin binding protein Sib38                              |
| Streptococcus sobrinus   | VBIStrSob214544_1226 | Immunoglobulin G-endopeptidase IdeS Mac Secreted immunoglobulin binding protein Sib38                              |
| Streptococcus sobrinus   | VBIStrSob211566_0112 | L-proline glycine betaine ABC transport system permease protein ProV TC 3.A.1.12.1                                 |
| Streptococcus sobrinus   | VBIStrSob214729_0651 | Lantibiotic transport ATP-binding protein strF                                                                     |
| Streptococcus sobrinus   | VBIStrSob209984_0543 | Lipid A export ATP-binding permease protein MsbA                                                                   |
| Streptococcus sobrinus   | VBIStrSob215046_0483 | Lipoate-protein ligase A                                                                                           |
| Streptococcus sobrinus   | VBIStrSob206829_1578 | Maltose operon transcriptional repressor MalR 2C LacI family                                                       |
| Streptococcus sobrinus   | VBIStrSob205529_0251 | Manganese superoxide dismutase EC 1.15.1.1                                                                         |
| Streptococcus sobrinus   | VBIStrSob214729_3481 | Manganese superoxide dismutase EC 1.15.1.1                                                                         |
| Streptococcus sobrinus   | VBIStrSob205050_0716 | Membrane protein involved in the export of O-antigen 2C teichoic acid lipoteichoic acids                           |
| Streptococcus sobrinus   | VBIStrSob205529_0542 | Methionine ABC transporter ATP-binding protein                                                                     |
| Streptococcus sobrinus   | VBIStrSob205478_0671 | N-acetylmuramoyl-L-alanine amidase EC 3.5.1.28                                                                     |
| Streptococcus sobrinus   | VBIStrSob205050_1163 | N-acetylmuramoyl-L-alanine amidase EC 3.5.1.28                                                                     |
| Streptococcus sobrinus   | VBIStrSob214544_0646 | Oligopeptide transport ATP-binding protein OppF TC 3.A.1.5.1                                                       |
| Streptococcus sobrinus   | VBIStrSob212168_0763 | Phosphoglucomutase EC 5.4.2.2                                                                                      |

Table S8

|                                  |                      |                                                                                                                            |
|----------------------------------|----------------------|----------------------------------------------------------------------------------------------------------------------------|
| Streptococcus sobrinus           | VBIStrSob214544_0934 | Prolipoprotein diacylglycerol transferase EC 2.4.99.-                                                                      |
| Streptococcus sobrinus           | VBIStrSob205050_0555 | Protein export cytoplasm protein SecA ATPase RNA helicase TC 3.A.5.1.1                                                     |
| Streptococcus sobrinus           | VBIStrSob213128_0105 | putative ATP-dependent Clp proteinase ATP-binding subunit                                                                  |
| Streptococcus sobrinus           | VBIStrSob214544_0103 | Secreted Endo-beta-N-acetylglucosaminidase EndoS                                                                           |
| Streptococcus sobrinus           | VBIStrSob205529_0779 | Sialidase EC 3.2.1.18                                                                                                      |
| Streptococcus sobrinus           | VBIStrSob214729_1324 | Sortase A 2C LPXTG specific                                                                                                |
| Streptococcus sobrinus           | VBIStrSob215046_0326 | Streptococcal cysteine protease Streptopain EC 3.4.22.10 Streptococcal pyrogenic exotoxin B SpeB                           |
| Streptococcus sobrinus           | VBIStrSob215046_0437 | Translation elongation factor Tu                                                                                           |
| Streptococcus sobrinus           | VBIStrSob205529_0449 | Two-component sensor kinase SA14-24                                                                                        |
| Streptococcus sobrinus           | VBIStrSob205050_0953 | UDP-galactopyranose mutase EC 5.4.99.9                                                                                     |
| Streptococcus sobrinus           | VBIStrSob209984_0904 | UDP-glucose 4-epimerase EC 5.1.3.2                                                                                         |
| Streptococcus sobrinus           | VBIStrSob209984_0537 | UDP-glucose 4-epimerase EC 5.1.3.2                                                                                         |
| Streptococcus sobrinus           | VBIStrSob215046_1592 | Urease gamma subunit EC 3.5.1.5                                                                                            |
| Streptococcus sobrinus           | VBIStrSob209984_0822 | UTP--glucose-1-phosphate uridylyltransferase EC 2.7.7.9                                                                    |
| Streptococcus sobrinus           | VBIStrSob211566_0388 | Zinc metalloprotease zmpB precursor EC 3.4.24.-                                                                            |
| Streptococcus sp. oral taxon 056 | VBIStrSp172755_0576  | ABC transporter 2C ATP-binding permease protein                                                                            |
| Streptococcus sp. oral taxon 058 | VBIStrSp165326_1574  | 2 C3-butanediol dehydrogenase 2C S-alcohol forming 2C R-acetoin-specific EC 1.1.1.4 Acetoin diacetyl reductase EC          |
| Streptococcus sp. oral taxon 058 | VBIStrSp165326_0412  | ABC transporter 2C ATP-binding permease protein                                                                            |
| Streptococcus sp. oral taxon 058 | VBIStrSp165326_0086  | ABC transporter 2C ATP-binding permease protein                                                                            |
| Streptococcus sp. oral taxon 058 | VBIStrSp165326_0584  | Branched-chain amino acid transport ATP-binding protein LivF TC 3.A.1.4.1                                                  |
| Streptococcus sp. oral taxon 058 | VBIStrSp165326_1647  | Exopolysaccharide biosynthesis transcriptional activator EpsA                                                              |
| Streptococcus sp. oral taxon 058 | VBIStrSp165326_0025  | Glucosyltransferase GtfG                                                                                                   |
| Streptococcus sp. oral taxon 058 | VBIStrSp165326_1240  | Glucosyltransferase GtfG                                                                                                   |
| Streptococcus sp. oral taxon 058 | VBIStrSp165326_0372  | Glucosyltransferase GtfG                                                                                                   |
| Streptococcus sp. oral taxon 058 | VBIStrSp165326_1745  | hypothetical protein                                                                                                       |
| Streptococcus sp. oral taxon 058 | VBIStrSp165326_1669  | hypothetical protein                                                                                                       |
| Streptococcus sp. oral taxon 058 | VBIStrSp165326_0129  | putative ATP-dependent Clp proteinase ATP-binding subunit                                                                  |
| Streptococcus sp. oral taxon 058 | VBIStrSp165326_0365  | putative ATP-dependent Clp proteinase ATP-binding subunit                                                                  |
| Streptococcus sp. oral taxon 058 | VBIStrSp165326_0098  | Pyrroline-5-carboxylate reductase EC 1.5.1.2                                                                               |
| Streptococcus sp. oral taxon 058 | VBIStrSp165326_1476  | Serine protease 2C DegP HtrA 2C do-like EC 3.4.21.-                                                                        |
| Streptococcus sp. oral taxon 058 | VBIStrSp165326_0750  | Undecaprenyl-phosphate N-acetylglucosaminyl 1-phosphate transferase EC 2.7.8.-                                             |
| Streptococcus sp. oral taxon 058 | VBIStrSp165326_0861  | Urease gamma subunit EC 3.5.1.5                                                                                            |
| Streptococcus sp. oral taxon 071 | VBIStrSp169195_1605  | Choline binding protein A                                                                                                  |
| Streptococcus sp. oral taxon 071 | VBIStrSp169195_1509  | FIGO1114802 hypothetical protein                                                                                           |
| Streptococcus sp. oral taxon 071 | VBIStrSp169195_0770  | Glucosyltransferase GtfG                                                                                                   |
| Streptococcus sp. oral taxon 071 | VBIStrSp169195_0320  | Glucosyltransferase GtfG                                                                                                   |
| Streptococcus sp. oral taxon 071 | VBIStrSp169195_1353  | Urease gamma subunit EC 3.5.1.5                                                                                            |
| Streptococcus vestibularis       | VBIStrVes170898_1087 | Choline binding protein A                                                                                                  |
| Streptococcus vestibularis       | VBIStrVes170898_0327 | Choline binding protein A                                                                                                  |
| Synergistetes bacterium          | VBISynBac132255_1608 | 3-oxoacyl-acyl-carrier-protein synthase 2C KASII EC 2.3.1.41                                                               |
| Synergistetes bacterium          | VBISynBac132255_0579 | Anthranilate phosphoribosyltransferase EC 2.4.2.18                                                                         |
| Synergistetes bacterium          | VBISynBac132255_1651 | ATP synthase alpha chain EC 3.6.3.14                                                                                       |
| Synergistetes bacterium          | VBISynBac132255_0762 | Candidate zinc-binding lipoprotein ZinT                                                                                    |
| Synergistetes bacterium          | VBISynBac132255_1650 | cation-transporting ATPase 2C E1-E2 family                                                                                 |
| Synergistetes bacterium          | VBISynBac132255_1383 | cation-transporting ATPase 2C E1-E2 family                                                                                 |
| Synergistetes bacterium          | VBISynBac132255_1774 | Cell envelope-associated transcriptional attenuator LytR-CpsA-Psr 2C subfamily F2 as in PMID19099556                       |
| Synergistetes bacterium          | VBISynBac132255_1876 | Choline binding protein A                                                                                                  |
| Synergistetes bacterium          | VBISynBac132255_0025 | Choline binding protein A                                                                                                  |
| Synergistetes bacterium          | VBISynBac132255_0216 | Competence-stimulating peptide ABC transporter ATP-binding protein ComA                                                    |
| Synergistetes bacterium          | VBISynBac132255_1313 | Competence-stimulating peptide ABC transporter ATP-binding protein ComA                                                    |
| Synergistetes bacterium          | VBISynBac132255_2228 | D-alanyl-D-alanine carboxypeptidase EC 3.4.16.4                                                                            |
| Synergistetes bacterium          | VBISynBac132255_0946 | FIGO1119388 hypothetical protein                                                                                           |
| Synergistetes bacterium          | VBISynBac132255_0026 | Glucosyltransferase GtfG                                                                                                   |
| Synergistetes bacterium          | VBISynBac132255_1780 | Glucosyltransferase GtfG                                                                                                   |
| Synergistetes bacterium          | VBISynBac132255_0972 | Hemolysin III                                                                                                              |
| Synergistetes bacterium          | VBISynBac132255_0028 | NAD-dependent glyceraldehyde-3-phosphate dehydrogenase EC 1.2.1.12 Plasminogen receptor                                    |
| Synergistetes bacterium          | VBISynBac132255_0171 | Ornithine carbamoyltransferase EC 2.1.3.3                                                                                  |
| Synergistetes bacterium          | VBISynBac132255_0434 | Ornithine carbamoyltransferase EC 2.1.3.3                                                                                  |
| Synergistetes bacterium          | VBISynBac132255_1144 | Ornithine carbamoyltransferase EC 2.1.3.3                                                                                  |
| Synergistetes bacterium          | VBISynBac132255_1860 | Osmotically activated L-carnitine choline ABC transporter 2C ATP-binding protein OpuCA                                     |
| Synergistetes bacterium          | VBISynBac132255_0784 | Phosphoglucomutase EC 5.4.2.2                                                                                              |
| Synergistetes bacterium          | VBISynBac132255_0842 | Protein export cytoplasm protein SecA ATPase RNA helicase TC 3.A.5.1.1                                                     |
| Synergistetes bacterium          | VBISynBac132255_1505 | Protein export cytoplasm protein SecA ATPase RNA helicase TC 3.A.5.1.1                                                     |
| Synergistetes bacterium          | VBISynBac132255_1108 | Protein export cytoplasm protein SecA ATPase RNA helicase TC 3.A.5.1.1                                                     |
| Synergistetes bacterium          | VBISynBac132255_1897 | Putrescine carbamoyltransferase EC 2.1.3.6                                                                                 |
| Synergistetes bacterium          | VBISynBac132255_0112 | Putrescine carbamoyltransferase EC 2.1.3.6                                                                                 |
| Synergistetes bacterium          | VBISynBac132255_1400 | Streptococcal lipoprotein rotamase A 3B Peptidyl-prolyl cis-trans isomerase EC 5.2.1.8                                     |
| Synergistetes bacterium          | VBISynBac132255_1595 | Translation elongation factor Tu                                                                                           |
| Synergistetes bacterium          | VBISynBac132255_1896 | Translation elongation factor Tu                                                                                           |
| Synergistetes bacterium          | VBISynBac132255_0948 | Two-component response regulator SA14-24                                                                                   |
| Synergistetes bacterium          | VBISynBac132255_0030 | Two-component response regulator SA14-24                                                                                   |
| Synergistetes bacterium          | VBISynBac132255_1641 | Undecaprenyl pyrophosphate synthetase EC 2.5.1.31                                                                          |
| Tannerella forsythia             | VBITanFor42681_2037  | 3R-hydroxymyristoyl-acyl carrier protein dehydratase EC 4.2.1.-                                                            |
| Tannerella forsythia             | VBITanFor42681_1234  | ABC transporter 2C ATP-binding protein EcsA                                                                                |
| Tannerella forsythia             | VBITanFor42681_1819  | ABC transporter 2C ATP-binding protein Vex2                                                                                |
| Tannerella forsythia             | VBITanFor42681_1471  | ABC transporter ATP-binding protein                                                                                        |
| Tannerella forsythia             | VBITanFor42681_0797  | ABC-transporter ATP-binding protein -possibly involved in cell wall localization and side chain formation of rhamnose-gluc |
| Tannerella forsythia             | VBITanFor42681_0289  | ABC-type antimicrobial peptide transport system 2C ATPase component                                                        |
| Tannerella forsythia             | VBITanFor42681_1576  | Alcohol dehydrogenase EC 1.1.1.1 3B Acetaldehyde dehydrogenase EC 1.2.1.10                                                 |

Table S8

|                      |                      |                                                                                                           |
|----------------------|----------------------|-----------------------------------------------------------------------------------------------------------|
| Tannerella forsythia | VBITanFor42681_0109  | Alpha-L-Rha alpha-1 2C2-L-rhamnosyltransferase alpha-L-Rha alpha-1 2C3-L- rhamnosyltransferase EC 2.4.1.- |
| Tannerella forsythia | VBITanFor42681_0956  | Alpha-L-Rha alpha-1 2C2-L-rhamnosyltransferase alpha-L-Rha alpha-1 2C3-L- rhamnosyltransferase EC 2.4.1.- |
| Tannerella forsythia | VBITanFor42681_0824  | Anthranilate synthase 2C aminase component EC 4.1.3.27                                                    |
| Tannerella forsythia | VBITanFor42681_1745  | ATP-dependent Clp protease 2C ATP-binding subunit ClpC                                                    |
| Tannerella forsythia | VBITanFor42681_1751  | ATP-dependent Clp protease 2C ATP-binding subunit ClpC                                                    |
| Tannerella forsythia | VBITanFor42681_0010  | ATP-dependent Clp protease 2C ATP-binding subunit ClpE                                                    |
| Tannerella forsythia | VBITanFor42681_1707  | ATP-dependent Clp protease ATP-binding subunit ClpA                                                       |
| Tannerella forsythia | VBITanFor42681_0955  | ATP-dependent Clp protease ATP-binding subunit ClpA                                                       |
| Tannerella forsythia | VBITanFor42681_0943  | ATP-dependent Clp protease ATP-binding subunit ClpA                                                       |
| Tannerella forsythia | VBITanFor42681_1541  | Branched-chain amino acid transport ATP-binding protein LivF TC 3.A.1.4.1                                 |
| Tannerella forsythia | VBITanFor42681_0108  | cation-transporting ATPase 2C E1-E2 family                                                                |
| Tannerella forsythia | VBITanFor42681_0016  | cation-transporting ATPase 2C E1-E2 family                                                                |
| Tannerella forsythia | VBITanFor42681_1951  | Chemotaxis regulator - transmits chemoreceptor signals to flagellar motor components CheY                 |
| Tannerella forsythia | VBITanFor42681_2537  | Chemotaxis response regulator protein-glutamate methyltransferase CheB EC 3.1.1.61                        |
| Tannerella forsythia | VBITanFor42681_2531  | CoA-acylating propionaldehyde dehydrogenase                                                               |
| Tannerella forsythia | VBITanFor42681_1430  | COG1272 Predicted membrane protein hemolysin III homolog                                                  |
| Tannerella forsythia | VBITanFor42681_0095  | Competence-stimulating peptide ABC transporter ATP-binding protein ComA                                   |
| Tannerella forsythia | VBITanFor42681_0280  | Competence-stimulating peptide ABC transporter ATP-binding protein ComA                                   |
| Tannerella forsythia | VBITanFor42681_0384  | Competence-stimulating peptide ABC transporter ATP-binding protein ComA                                   |
| Tannerella forsythia | VBITanFor42681_0425  | D-alanyl transfer protein DltB                                                                            |
| Tannerella forsythia | VBITanFor42681_0937  | D-alanyl-D-alanine carboxypeptidase EC 3.4.16.4                                                           |
| Tannerella forsythia | VBITanFor42681_0484  | D-alanyl-D-alanine carboxypeptidase EC 3.4.16.4                                                           |
| Tannerella forsythia | VBITanFor42681_1635  | Diaminopimelate decarboxylase EC 4.1.1.20                                                                 |
| Tannerella forsythia | VBITanFor42681_1156  | dTDP-glucose 4 2C6-dehydratase EC 4.2.1.46                                                                |
| Tannerella forsythia | VBITanFor42681_1794  | Fibronectin fibrinogen-binding protein                                                                    |
| Tannerella forsythia | VBITanFor42681_2078  | Flagellar basal-body rod protein FlgC                                                                     |
| Tannerella forsythia | VBITanFor42681_1932  | Flagellar biosynthesis protein FliP                                                                       |
| Tannerella forsythia | VBITanFor42681_1976  | Flagellar motor rotation protein MotB                                                                     |
| Tannerella forsythia | VBITanFor42681_1961  | Flagellar motor switch protein FliM                                                                       |
| Tannerella forsythia | VBITanFor42681_0597  | GDP-mannose 4 2C6 dehydratase EC 4.2.1.47                                                                 |
| Tannerella forsythia | VBITanFor42681_0261  | Glucose-1-phosphate thymidyltransferase EC 2.7.7.24                                                       |
| Tannerella forsythia | VBITanFor42681_0765  | Glucosyltransferase GtfG                                                                                  |
| Tannerella forsythia | VBITanFor42681_0714  | Glucosyltransferase GtfG                                                                                  |
| Tannerella forsythia | VBITanFor42681_0501  | Glutamate-1-semialdehyde aminotransferase EC 5.4.3.8                                                      |
| Tannerella forsythia | VBITanFor42681_1233  | Glutamine synthetase type I EC 6.3.1.2                                                                    |
| Tannerella forsythia | VBITanFor42681_2619  | Glycosyltransferase                                                                                       |
| Tannerella forsythia | VBITanFor42681_1265  | Heat shock protein 60 family chaperone GroEL                                                              |
| Tannerella forsythia | VBITanFor42681_2499  | HtrA protease chaperone protein                                                                           |
| Tannerella forsythia | VBITanFor42681_2661  | hypothetical protein                                                                                      |
| Tannerella forsythia | VBITanFor42681_0665  | hypothetical protein                                                                                      |
| Tannerella forsythia | VBITanFor42681_2676  | hypothetical protein                                                                                      |
| Tannerella forsythia | VBITanFor42681_2888  | hypothetical protein                                                                                      |
| Tannerella forsythia | VBITanFor42681_1799  | hypothetical protein                                                                                      |
| Tannerella forsythia | VBITanFor42681_1804  | hypothetical protein                                                                                      |
| Tannerella forsythia | VBITanFor42681_0157  | Lipid A export ATP-binding permease protein MsbA                                                          |
| Tannerella forsythia | VBITanFor42681_1324  | Malonyl CoA-acyl carrier protein transacylase EC 2.3.1.39                                                 |
| Tannerella forsythia | VBITanFor42681_0624  | Manganese superoxide dismutase EC 1.15.1.1                                                                |
| Tannerella forsythia | VBITanFor42681_2530  | Mannose-6-phosphate isomerase EC 5.3.1.8                                                                  |
| Tannerella forsythia | VBITanFor42681_0635  | Metalloprotease 2C putative zinc-binding domain                                                           |
| Tannerella forsythia | VBITanFor42681_1473  | Methionine ABC transporter ATP-binding protein                                                            |
| Tannerella forsythia | VBITanFor42681_2241  | Methionine ABC transporter ATP-binding protein                                                            |
| Tannerella forsythia | VBITanFor42681_1339  | N-acetylmuramoyl-L-alanine amidase EC 3.5.1.28                                                            |
| Tannerella forsythia | VBITanFor42681_0415  | NAD-dependent glyceraldehyde-3-phosphate dehydrogenase EC 1.2.1.12                                        |
| Tannerella forsythia | VBITanFor42681_1876  | Oligopeptide ABC transporter 2C periplasmic oligopeptide-binding protein OppA TC 3.A.1.5.1                |
| Tannerella forsythia | VBITanFor42681_1301  | Oligopeptide ABC transporter 2C periplasmic oligopeptide-binding protein OppA TC 3.A.1.5.1                |
| Tannerella forsythia | VBITanFor42681_0581  | Oligopeptide transport ATP-binding protein OppD TC 3.A.1.5.1                                              |
| Tannerella forsythia | VBITanFor42681_0588  | Oligopeptide transport ATP-binding protein OppD TC 3.A.1.5.1                                              |
| Tannerella forsythia | VBITanFor42681_1991  | Polymyxin resistance protein ArnC 2C glycosyl transferase EC 2.4.-.-                                      |
| Tannerella forsythia | VBITanFor42681_1340  | Prolipoprotein diacylglyceryl transferase EC 2.4.99.-                                                     |
| Tannerella forsythia | VBITanFor42681_1884  | Prolipoprotein diacylglyceryl transferase EC 2.4.99.-                                                     |
| Tannerella forsythia | VBITanFor42681_0493  | Protein export cytoplasm protein SecA ATPase RNA helicase TC 3.A.5.1.1                                    |
| Tannerella forsythia | VBITanFor42681_1856  | putative cross-wall-targeting lipoprotein signal                                                          |
| Tannerella forsythia | VBITanFor42681_0637  | putative glucan-binding protein D 3B BglB-like protein                                                    |
| Tannerella forsythia | VBITanFor42681_2565  | RNA polymerase sigma factor for flagellar operon                                                          |
| Tannerella forsythia | VBITanFor42681_2242  | RNA polymerase sigma factor RpoD                                                                          |
| Tannerella forsythia | VBITanFor42681_0931  | Serine threonine protein kinase PrkC 2C regulator of stationary phase                                     |
| Tannerella forsythia | VBITanFor42681_2624  | Transport ATP-binding protein CydC                                                                        |
| Tannerella forsythia | VBITanFor42681_1095  | Tyrosine-protein phosphatase CpsB EC 3.1.3.48                                                             |
| Tannerella forsythia | VBITanFor42681_0239  | UDP-galactopyranose mutase EC 5.4.99.9                                                                    |
| Tannerella forsythia | VBITanFor42681_1283  | UDP-glucose dehydrogenase EC 1.1.1.22                                                                     |
| Tannerella forsythia | VBITanFor42681_1538  | Undecaprenyl pyrophosphate synthetase EC 2.5.1.31                                                         |
| Tannerella forsythia | VBITanFor42681_1232  | UTP--glucose-1-phosphate uridylyltransferase EC 2.7.7.9                                                   |
| Treponema denticola  | VBITreDen445_0626    | 2-amino-3-ketobutyrate coenzyme A ligase EC 2.3.1.29                                                      |
| Treponema denticola  | VBITreDen150577_1587 | 3-deoxy-D-manno-octulosonic-acid transferase EC 2.-.-.-                                                   |
| Treponema denticola  | VBITreDen150577_0263 | 3-deoxy-manno-octulosonate cytidylyltransferase EC 2.7.7.38                                               |
| Treponema denticola  | VBITreDen445_2601    | 3-oxoacyl-acyl-carrier protein reductase EC 1.1.1.100                                                     |
| Treponema denticola  | VBITreDen445_1359    | 3-oxoacyl-acyl-carrier protein reductase EC 1.1.1.100                                                     |
| Treponema denticola  | VBITreDen150577_1861 | 3-oxoacyl-acyl-carrier protein reductase EC 1.1.1.100                                                     |
| Treponema denticola  | VBITreDen150577_0527 | 3-oxoacyl-acyl-carrier-protein synthase 2C KASI EC 2.3.1.41                                               |

Table S8

|                     |                      |                                                                                           |
|---------------------|----------------------|-------------------------------------------------------------------------------------------|
| Treponema denticola | VBITreDen150577_2621 | 3-oxoacyl-acyl-carrier-protein synthase 2C KASII EC 2.3.1.41                              |
| Treponema denticola | VBITreDen445_2196    | 3-oxoacyl-acyl-carrier-protein synthase 2C KASII EC 2.3.1.41                              |
| Treponema denticola | VBITreDen150577_2662 | ABC transporter 2C ATP-binding permease protein                                           |
| Treponema denticola | VBITreDen445_1610    | ABC transporter 2C ATP-binding permease protein                                           |
| Treponema denticola | VBITreDen445_1433    | ABC transporter 2C ATP-binding permease protein                                           |
| Treponema denticola | VBITreDen445_0578    | ABC transporter 2C ATP-binding permease protein                                           |
| Treponema denticola | VBITreDen445_1455    | ABC transporter 2C ATP-binding permease protein                                           |
| Treponema denticola | VBITreDen150577_2298 | ABC transporter 2C ATP-binding permease protein                                           |
| Treponema denticola | VBITreDen150577_2319 | ABC transporter 2C ATP-binding permease protein                                           |
| Treponema denticola | VBITreDen445_2459    | ABC transporter 2C ATP-binding permease protein                                           |
| Treponema denticola | VBITreDen445_1597    | ABC transporter 2C ATP-binding permease protein                                           |
| Treponema denticola | VBITreDen445_2451    | ABC transporter 2C ATP-binding permease protein                                           |
| Treponema denticola | VBITreDen445_1609    | ABC transporter 2C ATP-binding permease protein                                           |
| Treponema denticola | VBITreDen445_1921    | ABC transporter 2C ATP-binding permease protein                                           |
| Treponema denticola | VBITreDen150577_2462 | ABC transporter 2C ATP-binding protein                                                    |
| Treponema denticola | VBITreDen150577_2483 | ABC transporter 2C ATP-binding protein                                                    |
| Treponema denticola | VBITreDen445_1223    | ABC transporter 2C ATP-binding protein                                                    |
| Treponema denticola | VBITreDen150577_2223 | ABC transporter 2C ATP-binding protein                                                    |
| Treponema denticola | VBITreDen445_1171    | ABC transporter 2C ATP-binding protein                                                    |
| Treponema denticola | VBITreDen445_2607    | ABC transporter 2C ATP-binding protein                                                    |
| Treponema denticola | VBITreDen445_2170    | ABC transporter 2C ATP-binding protein                                                    |
| Treponema denticola | VBITreDen445_2388    | ABC transporter 2C ATP-binding protein                                                    |
| Treponema denticola | VBITreDen445_0042    | ABC transporter 2C ATP-binding protein                                                    |
| Treponema denticola | VBITreDen445_0903    | ABC transporter 2C ATP-binding protein                                                    |
| Treponema denticola | VBITreDen150577_1389 | ABC transporter 2C ATP-binding protein                                                    |
| Treponema denticola | VBITreDen445_1036    | ABC transporter 2C ATP-binding protein 2C putative                                        |
| Treponema denticola | VBITreDen150577_0541 | ABC transporter ATP-binding protein                                                       |
| Treponema denticola | VBITreDen445_0264    | ABC transporter ATP-binding protein                                                       |
| Treponema denticola | VBITreDen445_1616    | ABC transporter ATP-binding protein                                                       |
| Treponema denticola | VBITreDen150577_1387 | ABC transporter ATP-binding protein                                                       |
| Treponema denticola | VBITreDen445_1480    | ABC transporter ATP-binding protein                                                       |
| Treponema denticola | VBITreDen150577_2489 | ABC transporter ATP-binding protein                                                       |
| Treponema denticola | VBITreDen150577_1285 | ABC transporter ATP-binding protein                                                       |
| Treponema denticola | VBITreDen150577_1411 | ABC transporter ATP-binding protein                                                       |
| Treponema denticola | VBITreDen445_1195    | ABC transporter ATP-binding protein                                                       |
| Treponema denticola | VBITreDen150577_0605 | ABC transporter ATP-binding protein YvcR                                                  |
| Treponema denticola | VBITreDen445_1283    | ABC-type multidrug transport system 2C ATPase and permease components                     |
| Treponema denticola | VBITreDen445_2386    | ABC-type multidrug transport system 2C ATPase and permease components                     |
| Treponema denticola | VBITreDen445_2612    | ABC-type multidrug transport system 2C ATPase component                                   |
| Treponema denticola | VBITreDen150577_1143 | Acyl-acyl-carrier-protein--UDP-N- acetylglucosamine O-acyltransferase EC 2.3.1.129        |
| Treponema denticola | VBITreDen150577_2567 | Acyl-coenzyme A synthetases AMP-fatty acid ligases                                        |
| Treponema denticola | VBITreDen150577_0587 | Acyl-coenzyme A synthetases AMP-fatty acid ligases                                        |
| Treponema denticola | VBITreDen445_2209    | Acyl-coenzyme A synthetases AMP-fatty acid ligases                                        |
| Treponema denticola | VBITreDen150577_1872 | Adenylate cyclase EC 4.6.1.1                                                              |
| Treponema denticola | VBITreDen150577_1604 | Alpha-D-GlcNAc alpha-1 2C2-L-rhamnosyltransferase EC 2.4.1.-                              |
| Treponema denticola | VBITreDen150577_1011 | Arabinose 5-phosphate isomerase EC 5.3.1.13                                               |
| Treponema denticola | VBITreDen150577_0934 | arylsulfatase                                                                             |
| Treponema denticola | VBITreDen150577_0711 | ATP synthase alpha chain EC 3.6.3.14                                                      |
| Treponema denticola | VBITreDen150577_0726 | ATP synthase beta chain EC 3.6.3.14                                                       |
| Treponema denticola | VBITreDen445_0673    | ATP-dependent Clp protease ATP-binding subunit ClpA                                       |
| Treponema denticola | VBITreDen445_0627    | ATP-dependent Clp protease ATP-binding subunit ClpA                                       |
| Treponema denticola | VBITreDen445_2626    | capsular polysaccharide biosynthesis protein                                              |
| Treponema denticola | VBITreDen445_1382    | capsular polysaccharide biosynthesis protein                                              |
| Treponema denticola | VBITreDen150577_0210 | Cell division transporter 2C ATP-binding protein FtsE TC 3.A.5.1.1                        |
| Treponema denticola | VBITreDen150577_0797 | Cell division transporter 2C ATP-binding protein FtsE TC 3.A.5.1.1                        |
| Treponema denticola | VBITreDen445_1134    | Cell division trigger factor EC 5.2.1.8                                                   |
| Treponema denticola | VBITreDen445_1367    | Chemotaxis protein methyltransferase CheR EC 2.1.1.80                                     |
| Treponema denticola | VBITreDen445_2609    | Chemotaxis protein methyltransferase CheR EC 2.1.1.80                                     |
| Treponema denticola | VBITreDen445_1028    | Chemotaxis regulator - transmits chemoreceptor signals to flagellar motor components CheY |
| Treponema denticola | VBITreDen445_2610    | Chemotaxis response regulator protein-glutamate methylesterase CheB EC 3.1.1.61           |
| Treponema denticola | VBITreDen445_1374    | Chemotaxis response regulator protein-glutamate methylesterase CheB EC 3.1.1.61           |
| Treponema denticola | VBITreDen445_0886    | Cholinephosphate cytidyltransferase EC 2.7.7.15 Choline kinase EC 2.7.1.32                |
| Treponema denticola | VBITreDen445_0573    | ClpB protein                                                                              |
| Treponema denticola | VBITreDen150577_1315 | di-trans 2Cpoly-cis-decaprenylcistransferase                                              |
| Treponema denticola | VBITreDen150577_0840 | Diaminopimelate decarboxylase EC 4.1.1.20                                                 |
| Treponema denticola | VBITreDen150577_0258 | Diaminopimelate decarboxylase EC 4.1.1.20                                                 |
| Treponema denticola | VBITreDen445_2007    | Dipeptide transport ATP-binding protein DppF TC 3.A.1.5.2                                 |
| Treponema denticola | VBITreDen445_2179    | DNA-binding response regulator                                                            |
| Treponema denticola | VBITreDen150577_1873 | dTDP-glucose 4 2C6-dehydratase EC 4.2.1.46                                                |
| Treponema denticola | VBITreDen150577_1684 | dTDP-glucose 4 2C6-dehydratase EC 4.2.1.46                                                |
| Treponema denticola | VBITreDen445_0964    | dTDP-glucose 4 2C6-dehydratase EC 4.2.1.46                                                |
| Treponema denticola | VBITreDen150577_1667 | Enolase EC 4.2.1.11                                                                       |
| Treponema denticola | VBITreDen445_1797    | Enolase EC 4.2.1.11                                                                       |
| Treponema denticola | VBITreDen150577_1439 | exopolysaccharide biosynthesis polyprenyl glycosylphosphotransferase                      |
| Treponema denticola | VBITreDen150577_2291 | Ferric iron ABC transporter 2C ATP-binding protein                                        |
| Treponema denticola | VBITreDen445_2157    | Ferrichrome transport system permease protein FhuB TC 3.A.1.14.3                          |
| Treponema denticola | VBITreDen150577_1665 | Ferrous iron transport protein B                                                          |
| Treponema denticola | VBITreDen445_0890    | FIG01187002 hypothetical protein                                                          |
| Treponema denticola | VBITreDen445_0732    | Flagellar basal-body rod protein FlgC                                                     |

Table S8

|                     |                      |                                                                                                            |
|---------------------|----------------------|------------------------------------------------------------------------------------------------------------|
| Treponema denticola | VBITreDen445_1895    | Flagellar basal-body rod protein FlgF                                                                      |
| Treponema denticola | VBITreDen445_1896    | Flagellar basal-body rod protein FlgG                                                                      |
| Treponema denticola | VBITreDen445_2220    | Flagellar biosynthesis protein FlhA                                                                        |
| Treponema denticola | VBITreDen150577_2566 | Flagellar biosynthesis protein FlhB                                                                        |
| Treponema denticola | VBITreDen445_2212    | Flagellar biosynthesis protein FlhB                                                                        |
| Treponema denticola | VBITreDen150577_2704 | Flagellar biosynthesis protein FlhP                                                                        |
| Treponema denticola | VBITreDen150577_2665 | Flagellar hook protein FlgE                                                                                |
| Treponema denticola | VBITreDen445_0336    | Flagellar hook-associated protein FlgK                                                                     |
| Treponema denticola | VBITreDen445_0790    | Flagellar M-ring protein FlhF                                                                              |
| Treponema denticola | VBITreDen150577_2699 | Flagellar motor rotation protein MotA                                                                      |
| Treponema denticola | VBITreDen150577_2701 | Flagellar motor rotation protein MotB                                                                      |
| Treponema denticola | VBITreDen445_0791    | Flagellar motor switch protein FlhG                                                                        |
| Treponema denticola | VBITreDen150577_2703 | Flagellar motor switch protein FlhM                                                                        |
| Treponema denticola | VBITreDen445_0030    | Flagellar synthesis regulator FlhN                                                                         |
| Treponema denticola | VBITreDen445_1022    | Flagellin protein FlaA                                                                                     |
| Treponema denticola | VBITreDen445_0967    | Flagellin protein FlaA                                                                                     |
| Treponema denticola | VBITreDen445_1862    | Flagellin protein FlaA                                                                                     |
| Treponema denticola | VBITreDen445_0867    | Flagellum-specific ATP synthase Flil                                                                       |
| Treponema denticola | VBITreDen150577_2180 | GDP-mannose 4 2C6 dehydratase EC 4.2.1.47                                                                  |
| Treponema denticola | VBITreDen150577_2070 | gliding motility-associated protein GlfE                                                                   |
| Treponema denticola | VBITreDen150577_1879 | gluconate 5-dehydrogenase                                                                                  |
| Treponema denticola | VBITreDen150577_0599 | Glucose-1-phosphate thymidyltransferase EC 2.7.7.24                                                        |
| Treponema denticola | VBITreDen445_0056    | Glycerol-3-phosphate dehydrogenase EC 1.1.5.3                                                              |
| Treponema denticola | VBITreDen150577_1025 | Glycosyl transferase 2C group 2 family protein                                                             |
| Treponema denticola | VBITreDen150577_1735 | Glycosyltransferase                                                                                        |
| Treponema denticola | VBITreDen150577_0670 | glycosyltransferase 2C group 1 family protein                                                              |
| Treponema denticola | VBITreDen150577_1588 | glycosyltransferase 2C group 2 family protein                                                              |
| Treponema denticola | VBITreDen150577_0841 | GTP pyrophosphokinase EC 2.7.6.5 Guanosine-3' 2C5'-bisdiphosphate 3'-pyrophosphohydrolase EC 3.1.7.2       |
| Treponema denticola | VBITreDen150577_1357 | GTP pyrophosphokinase EC 2.7.6.5 2C pppGpp synthetase I                                                    |
| Treponema denticola | VBITreDen445_2102    | Heat shock protein 60 family chaperone GroEL                                                               |
| Treponema denticola | VBITreDen150577_0602 | HtrA protease chaperone protein                                                                            |
| Treponema denticola | VBITreDen150577_2380 | hypothetical protein                                                                                       |
| Treponema denticola | VBITreDen150577_2381 | hypothetical protein                                                                                       |
| Treponema denticola | VBITreDen445_0240    | hypothetical protein                                                                                       |
| Treponema denticola | VBITreDen445_0266    | hypothetical protein                                                                                       |
| Treponema denticola | VBITreDen445_2412    | hypothetical protein                                                                                       |
| Treponema denticola | VBITreDen150577_2177 | hypothetical protein                                                                                       |
| Treponema denticola | VBITreDen150577_1428 | hypothetical protein                                                                                       |
| Treponema denticola | VBITreDen445_2417    | hypothetical protein                                                                                       |
| Treponema denticola | VBITreDen150577_2626 | hypothetical protein                                                                                       |
| Treponema denticola | VBITreDen150577_2635 | hypothetical protein                                                                                       |
| Treponema denticola | VBITreDen445_2109    | Hypothetical radical SAM family enzyme 2C NOT coproporphyrinogen III oxidase 2C oxygen-independent         |
| Treponema denticola | VBITreDen150577_0230 | Internalin-like protein LPXTG motif Lmo0331 homolog                                                        |
| Treponema denticola | VBITreDen150577_0211 | Internalin-like protein LPXTG motif Lmo0331 homolog                                                        |
| Treponema denticola | VBITreDen150577_0257 | Internalin-like protein LPXTG motif Lmo0331 homolog                                                        |
| Treponema denticola | VBITreDen445_2483    | internalin-related protein                                                                                 |
| Treponema denticola | VBITreDen445_2538    | internalin-related protein                                                                                 |
| Treponema denticola | VBITreDen445_1355    | internalin-related protein                                                                                 |
| Treponema denticola | VBITreDen445_1356    | internalin-related protein                                                                                 |
| Treponema denticola | VBITreDen445_2502    | internalin-related protein                                                                                 |
| Treponema denticola | VBITreDen445_2537    | internalin-related protein                                                                                 |
| Treponema denticola | VBITreDen445_1291    | internalin-related protein                                                                                 |
| Treponema denticola | VBITreDen445_2535    | internalin-related protein                                                                                 |
| Treponema denticola | VBITreDen445_1294    | internalin-related protein                                                                                 |
| Treponema denticola | VBITreDen150577_0540 | iron chelate uptake ABC transporter 2C FeCT family 2C permease protein                                     |
| Treponema denticola | VBITreDen445_2136    | iron compound ABC transporter                                                                              |
| Treponema denticola | VBITreDen150577_0322 | L-arginineglycine amidinotransferase                                                                       |
| Treponema denticola | VBITreDen150577_2482 | Lipid A export ATP-binding permease protein MsbA                                                           |
| Treponema denticola | VBITreDen150577_0586 | Lipid A export ATP-binding permease protein MsbA                                                           |
| Treponema denticola | VBITreDen445_2071    | Lipid A export ATP-binding permease protein MsbA                                                           |
| Treponema denticola | VBITreDen445_2225    | Lipid A export ATP-binding permease protein MsbA                                                           |
| Treponema denticola | VBITreDen150577_0551 | Lipid A export ATP-binding permease protein MsbA                                                           |
| Treponema denticola | VBITreDen445_0304    | Lipid A export ATP-binding permease protein MsbA                                                           |
| Treponema denticola | VBITreDen445_1133    | Lipoate-protein ligase A                                                                                   |
| Treponema denticola | VBITreDen445_0879    | Magnesium and cobalt efflux protein CorC                                                                   |
| Treponema denticola | VBITreDen150577_2224 | Malonyl CoA-acyl carrier protein transacylase EC 2.3.1.39                                                  |
| Treponema denticola | VBITreDen445_0868    | Manganese ABC transporter 2C ATP-binding protein SitB                                                      |
| Treponema denticola | VBITreDen150577_2129 | Mannose-1-phosphate guanylyltransferase GDP EC 2.7.7.22                                                    |
| Treponema denticola | VBITreDen445_0349    | membrane-associated zinc metalloprotease                                                                   |
| Treponema denticola | VBITreDen150577_2326 | methyl-accepting chemotaxis protein                                                                        |
| Treponema denticola | VBITreDen445_2432    | methyl-accepting chemotaxis protein                                                                        |
| Treponema denticola | VBITreDen150577_2627 | methyl-accepting chemotaxis protein                                                                        |
| Treponema denticola | VBITreDen150577_1176 | N-acetylglucosamine deacetylase EC 3.5.1.- 3R-hydroxymyristoyl-acyl carrier protein dehydratase EC 4.2.1.- |
| Treponema denticola | VBITreDen150577_1050 | N-acetylneuraminate synthase EC 2.5.1.56                                                                   |
| Treponema denticola | VBITreDen150577_1359 | NAD-dependent 4-hydroxybutyrate dehydrogenase EC 1.1.1.61                                                  |
| Treponema denticola | VBITreDen150577_0588 | NAD-dependent glyceraldehyde-3-phosphate dehydrogenase EC 1.2.1.12                                         |
| Treponema denticola | VBITreDen445_1027    | NAD-dependent glyceraldehyde-3-phosphate dehydrogenase EC 1.2.1.12                                         |
| Treponema denticola | VBITreDen445_0701    | Oligopeptide ABC transporter 2C periplasmic oligopeptide-binding protein OppA TC 3.A.1.5.1                 |
| Treponema denticola | VBITreDen150577_0320 | Oligopeptide transport ATP-binding protein OppD TC 3.A.1.5.1                                               |

Table S8

|                            |                      |                                                                                |
|----------------------------|----------------------|--------------------------------------------------------------------------------|
| Treponema denticola        | VBITreDen150577_0397 | Oligopeptide transport ATP-binding protein OppD TC 3.A.1.5.1                   |
| Treponema denticola        | VBITreDen445_0889    | Oligopeptide transport ATP-binding protein OppD TC 3.A.1.5.1                   |
| Treponema denticola        | VBITreDen445_1964    | Oligopeptide transport ATP-binding protein OppD TC 3.A.1.5.1                   |
| Treponema denticola        | VBITreDen150577_0296 | Oligopeptide transport ATP-binding protein OppF TC 3.A.1.5.1                   |
| Treponema denticola        | VBITreDen150577_0493 | Oligopeptide transport ATP-binding protein OppF TC 3.A.1.5.1                   |
| Treponema denticola        | VBITreDen445_1935    | Oligopeptide transport ATP-binding protein OppF TC 3.A.1.5.1                   |
| Treponema denticola        | VBITreDen445_1861    | Oligopeptide transport ATP-binding protein OppF TC 3.A.1.5.1                   |
| Treponema denticola        | VBITreDen445_0310    | Oligopeptide transport ATP-binding protein OppF TC 3.A.1.5.1                   |
| Treponema denticola        | VBITreDen445_0309    | Oligopeptide transport ATP-binding protein OppF TC 3.A.1.5.1                   |
| Treponema denticola        | VBITreDen150577_0335 | Ornithine carbamoyltransferase EC 2.1.3.3                                      |
| Treponema denticola        | VBITreDen445_1676    | Ornithine carbamoyltransferase EC 2.1.3.3                                      |
| Treponema denticola        | VBITreDen150577_2016 | outer membrane protein MIP                                                     |
| Treponema denticola        | VBITreDen150577_0600 | Pantoate-beta-alanine ligase EC 6.3.2.1                                        |
| Treponema denticola        | VBITreDen150577_1945 | peptidyl-prolyl cis-trans isomerase 2C FKBP-type                               |
| Treponema denticola        | VBITreDen445_0892    | Phosphoenolpyruvate phosphomutase EC 5.4.2.9                                   |
| Treponema denticola        | VBITreDen150577_1707 | Phosphoglucosaminidase EC 5.4.2.2                                              |
| Treponema denticola        | VBITreDen150577_1514 | Phosphonannomutase EC 5.4.2.8 Phosphoglucosamine mutase EC 5.4.2.10            |
| Treponema denticola        | VBITreDen445_0897    | Phosphopyruvate decarboxylase EC 4.1.1.82                                      |
| Treponema denticola        | VBITreDen150577_2155 | Phosphoribosylaminoimidazole-succinocarboxamide synthase EC 6.3.2.6            |
| Treponema denticola        | VBITreDen445_1380    | Phosphoribosylaminoimidazole-succinocarboxamide synthase EC 6.3.2.6            |
| Treponema denticola        | VBITreDen150577_1008 | Pleiotropic regulatory protein                                                 |
| Treponema denticola        | VBITreDen150577_0685 | polysaccharide biosynthesis protein                                            |
| Treponema denticola        | VBITreDen150577_1084 | probable bacteriocin lantibiotic ABC transporter 2C ATP-binding protein        |
| Treponema denticola        | VBITreDen150577_0728 | Probable polybeta-D-mannuronate O-acetylase EC 2.3.1.-                         |
| Treponema denticola        | VBITreDen445_1212    | Protein export cytoplasm protein SecA ATPase RNA helicase TC 3.A.5.1.1         |
| Treponema denticola        | VBITreDen150577_1386 | putative coproporphyrinogen dehydrogenase                                      |
| Treponema denticola        | VBITreDen150577_1396 | Putative dipeptidase 2C pyoverdin biosynthesis                                 |
| Treponema denticola        | VBITreDen150577_1591 | putative membrane protein                                                      |
| Treponema denticola        | VBITreDen150577_1065 | putative transcriptional regulatory protein afsQ1                              |
| Treponema denticola        | VBITreDen150577_0999 | putative transcriptional regulatory protein RprY                               |
| Treponema denticola        | VBITreDen150577_2507 | Putrescine transport ATP-binding protein PotA TC 3.A.1.11.1                    |
| Treponema denticola        | VBITreDen445_1235    | Response regulator of zinc sigma-54-dependent two-component system             |
| Treponema denticola        | VBITreDen445_0891    | RNA polymerase sigma factor RpoD                                               |
| Treponema denticola        | VBITreDen150577_2564 | RNA polymerase sigma factor RpoD                                               |
| Treponema denticola        | VBITreDen445_1757    | RNA polymerase sigma factor RpoD                                               |
| Treponema denticola        | VBITreDen445_0035    | RNA polymerase sigma factor SigB                                               |
| Treponema denticola        | VBITreDen150577_2264 | sensor histidine kinase response regulator                                     |
| Treponema denticola        | VBITreDen445_0691    | sigma-54 dependent transcriptional regulator                                   |
| Treponema denticola        | VBITreDen150577_1384 | Succinate-semialdehyde dehydrogenase 2C CoA-dependent                          |
| Treponema denticola        | VBITreDen150577_0336 | sulfate transport ATP-binding protein                                          |
| Treponema denticola        | VBITreDen150577_1518 | Superoxide dismutase Fe EC 1.15.1.1                                            |
| Treponema denticola        | VBITreDen150577_0191 | Teichoic acid export ATP-binding protein TagH EC 3.6.3.40                      |
| Treponema denticola        | VBITreDen150577_0796 | thermolysin metalloproteinase 2C catalytic domain protein                      |
| Treponema denticola        | VBITreDen150577_1678 | TonB-dependent receptor                                                        |
| Treponema denticola        | VBITreDen150577_1627 | Transcriptional regulatory protein rprY                                        |
| Treponema denticola        | VBITreDen150577_0345 | Translation elongation factor Tu                                               |
| Treponema denticola        | VBITreDen445_1427    | Translation elongation factor Tu                                               |
| Treponema denticola        | VBITreDen445_0239    | Transport ATP-binding protein CydC                                             |
| Treponema denticola        | VBITreDen150577_2477 | Transport ATP-binding protein CydC                                             |
| Treponema denticola        | VBITreDen445_2369    | Transport ATP-binding protein CydC                                             |
| Treponema denticola        | VBITreDen445_0722    | Transport ATP-binding protein CydC                                             |
| Treponema denticola        | VBITreDen150577_2496 | Transport ATP-binding protein CydC                                             |
| Treponema denticola        | VBITreDen445_0731    | Transport ATP-binding protein CydD                                             |
| Treponema denticola        | VBITreDen445_0057    | Transport ATP-binding protein CydD                                             |
| Treponema denticola        | VBITreDen445_2231    | transporter                                                                    |
| Treponema denticola        | VBITreDen150577_2481 | transporter                                                                    |
| Treponema denticola        | VBITreDen150577_0077 | two component transcriptional regulator 2C LuxR family                         |
| Treponema denticola        | VBITreDen150577_1244 | UDP-3-O-3-hydroxymyristoyl glucosamine N-acyltransferase EC 2.3.1.-            |
| Treponema denticola        | VBITreDen445_1415    | UDP-4-amino-4-deoxy-L-arabinose-oxoglutarate aminotransferase EC 2.6.1.-       |
| Treponema denticola        | VBITreDen150577_0597 | UDP-glucose 4-epimerase EC 5.1.3.2                                             |
| Treponema denticola        | VBITreDen445_1173    | UDP-glucose 4-epimerase EC 5.1.3.2                                             |
| Treponema denticola        | VBITreDen150577_2109 | UDP-glucose dehydrogenase EC 1.1.1.22                                          |
| Treponema denticola        | VBITreDen445_0948    | UDP-glucose dehydrogenase EC 1.1.1.22                                          |
| Treponema denticola        | VBITreDen150577_0672 | UDP-glucose dehydrogenase EC 1.1.1.22                                          |
| Treponema denticola        | VBITreDen150577_2549 | UDP-N-acetylenolpyruvoylglucosamine reductase EC 1.1.1.158                     |
| Treponema denticola        | VBITreDen150577_1042 | UDP-N-acetylglucosamine 2-epimerase EC 5.1.3.14                                |
| Treponema denticola        | VBITreDen150577_1036 | UDP-N-acetylglucosamine 2-epimerase EC 5.1.3.14                                |
| Treponema denticola        | VBITreDen445_0348    | Undecaprenyl pyrophosphate synthetase EC 2.5.1.31                              |
| Treponema denticola        | VBITreDen445_0040    | Undecaprenyl-phosphate N-acetylglucosaminyl 1-phosphate transferase EC 2.7.8.- |
| Treponema denticola        | VBITreDen150577_0708 | V-type ATP synthase subunit A EC 3.6.3.14                                      |
| Treponema denticola        | VBITreDen445_1168    | V-type ATP synthase subunit A EC 3.6.3.14                                      |
| Treponema denticola        | VBITreDen445_1137    | V-type ATP synthase subunit B EC 3.6.3.14                                      |
| Treponema denticola        | VBITreDen150577_0511 | V-type ATP synthase subunit B EC 3.6.3.14                                      |
| Treponema denticola        | VBITreDen445_1416    | Vitamin B12 ABC transporter 2C permease component BtuC                         |
| Treponema denticola        | VBITreDen445_0603    | Zinc ABC transporter 2C periplasmic-binding protein ZnuA                       |
| Treponema lecithinolyticum | tlec_c_313_7         | ABC transporter 2C ATP-binding permease protein                                |
| Treponema lecithinolyticum | tlec_c_162_15        | ABC transporter 2C ATP-binding permease protein                                |
| Treponema lecithinolyticum | tlec_c_408_3         | ABC transporter 2C ATP-binding permease protein                                |
| Treponema lecithinolyticum | tlec_c_280_4         | ABC transporter 2C ATP-binding permease protein                                |

Table S8

|                            |                      |                                                                                                                      |
|----------------------------|----------------------|----------------------------------------------------------------------------------------------------------------------|
| Treponema lecithinolyticum | tlec_c_189_2         | ABC transporter 2C ATP-binding permease protein                                                                      |
| Treponema lecithinolyticum | tlec_c_166_3         | ABC transporter 2C ATP-binding permease protein                                                                      |
| Treponema lecithinolyticum | tlec_c_292_2         | ABC transporter 2C ATP-binding permease protein                                                                      |
| Treponema lecithinolyticum | tlec_c_426_13        | ABC transporter ATP-binding protein                                                                                  |
| Treponema lecithinolyticum | tlec_c_43_3          | ABC transporter ATP-binding protein                                                                                  |
| Treponema lecithinolyticum | tlec_c_206_2         | ABC transporter ATP-binding protein                                                                                  |
| Treponema lecithinolyticum | tlec_c_81_19         | methyl-accepting chemotaxis protein                                                                                  |
| Treponema lecithinolyticum | tlec_c_5_2           | Ornithine carbamoyltransferase EC 2.1.3.3                                                                            |
| Treponema lecithinolyticum | tlec_c_1083_1        | UDP-4-amino-4-deoxy-L-arabinose-oxoglutarate aminotransferase EC 2.6.1.-                                             |
| Treponema lecithinolyticum | tlec_c_149_2         | Vitamin B12 ABC transporter 2C ATPase component BtuD                                                                 |
| Treponema lecithinolyticum | tlec_c_14_8          | Vitamin B12 ABC transporter 2C permease component BtuC                                                               |
| Treponema lecithinolyticum | tlec_c_155_3         | Vitamin B12 ABC transporter 2C permease component BtuC                                                               |
| Treponema pallidum         | VBITrePal10923_0544  | Alkyl hydroperoxide reductase protein C EC 1.6.4.-                                                                   |
| Treponema pallidum         | VBITrePal57110_0542  | Alkyl hydroperoxide reductase protein C EC 1.6.4.-                                                                   |
| Treponema pallidum         | VBITrePal10923_0846  | ATP-dependent Clp protease ATP-binding subunit ClpA                                                                  |
| Treponema pallidum         | VBITrePal57110_0846  | ATP-dependent Clp protease ATP-binding subunit ClpA                                                                  |
| Treponema pallidum         | VBITrePal10923_0082  | capsular polysaccharide biosynthesis protein                                                                         |
| Treponema pallidum         | VBITrePal57110_0085  | capsular polysaccharide biosynthesis protein                                                                         |
| Treponema pallidum         | VBITrePal10923_0073  | ClpB protein                                                                                                         |
| Treponema pallidum         | VBITrePal57110_0076  | ClpB protein                                                                                                         |
| Treponema pallidum         | VBITrePal10923_0864  | Enolase EC 4.2.1.11                                                                                                  |
| Treponema pallidum         | VBITrePal57110_0865  | Enolase EC 4.2.1.11                                                                                                  |
| Treponema pallidum         | VBITrePal10923_1016  | Flagellar basal-body rod protein FlgF                                                                                |
| Treponema pallidum         | VBITrePal10923_1015  | Flagellar basal-body rod protein FlgG                                                                                |
| Treponema pallidum         | VBITrePal57110_1013  | Flagellar basal-body rod protein FlgG                                                                                |
| Treponema pallidum         | VBITrePal57110_0763  | Flagellar biosynthesis protein FljP                                                                                  |
| Treponema pallidum         | VBITrePal10923_0701  | Flagellar hook-associated protein FlgK                                                                               |
| Treponema pallidum         | VBITrePal57110_0701  | Flagellar hook-associated protein FlgK                                                                               |
| Treponema pallidum         | VBITrePal10923_0427  | Flagellar motor switch protein FljG                                                                                  |
| Treponema pallidum         | VBITrePal57110_0424  | Flagellar motor switch protein FljG                                                                                  |
| Treponema pallidum         | VBITrePal10923_0765  | Flagellar motor switch protein FljM                                                                                  |
| Treponema pallidum         | VBITrePal57110_0766  | Flagellar motor switch protein FljM                                                                                  |
| Treponema pallidum         | VBITrePal10923_0764  | Flagellar motor switch protein FljN                                                                                  |
| Treponema pallidum         | VBITrePal57110_0765  | Flagellar motor switch protein FljN                                                                                  |
| Treponema pallidum         | VBITrePal10923_0756  | Flagellar synthesis regulator FleN                                                                                   |
| Treponema pallidum         | VBITrePal57110_0757  | Flagellar synthesis regulator FleN                                                                                   |
| Treponema pallidum         | VBITrePal57110_0921  | Flagellin protein FlaA                                                                                               |
| Treponema pallidum         | VBITrePal10923_0923  | Flagellin protein FlaA                                                                                               |
| Treponema pallidum         | VBITrePal57110_0923  | Flagellin protein FlaA                                                                                               |
| Treponema pallidum         | VBITrePal10923_0848  | Glycerol-3-phosphate ABC transporter 2C ATP-binding protein UgpC TC 3.A.1.1.3                                        |
| Treponema pallidum         | VBITrePal10923_0624  | Lipoprotein releasing system ATP-binding protein LolD                                                                |
| Treponema pallidum         | VBITrePal57110_0621  | Lipoprotein releasing system ATP-binding protein LolD                                                                |
| Treponema pallidum         | VBITrePal10923_0894  | NAD-dependent glyceraldehyde-3-phosphate dehydrogenase EC 1.2.1.12                                                   |
| Treponema pallidum         | VBITrePal10923_0347  | Outer membrane protein assembly factor YaeT precursor                                                                |
| Treponema pallidum         | VBITrePal57110_0343  | Outer membrane protein assembly factor YaeT precursor                                                                |
| Treponema pallidum         | VBITrePal10923_0891  | Outer membrane stress sensor protease DegS                                                                           |
| Treponema pallidum         | VBITrePal57110_0892  | Outer membrane stress sensor protease DegS                                                                           |
| Treponema pallidum         | VBITrePal10923_0608  | Probable polybeta-D-mannuronate O-acetylase EC 2.3.1.-                                                               |
| Treponema pallidum         | VBITrePal10923_0404  | Protein export cytoplasm protein SecA ATPase RNA helicase TC 3.A.5.1.1                                               |
| Treponema pallidum         | VBITrePal57110_0401  | Protein export cytoplasm protein SecA ATPase RNA helicase TC 3.A.5.1.1                                               |
| Treponema pallidum         | VBITrePal57110_0552  | Response regulator of zinc sigma-54-dependent two-component system                                                   |
| Treponema pallidum         | VBITrePal10923_0529  | RNA polymerase sigma factor RpoD                                                                                     |
| Treponema pallidum         | VBITrePal10923_1069  | RNA polymerase sigma factor RpoD                                                                                     |
| Treponema pallidum         | VBITrePal57110_0527  | RNA polymerase sigma factor RpoD                                                                                     |
| Treponema pallidum         | VBITrePal57110_1067  | RNA polymerase sigma factor RpoD                                                                                     |
| Treponema pallidum         | VBITrePal57110_0090  | sigma-54 dependent transcriptional regulator 2C putative                                                             |
| Treponema pallidum         | VBITrePal10923_0203  | Translation elongation factor Tu                                                                                     |
| Treponema pallidum         | VBITrePal57110_0203  | Translation elongation factor Tu                                                                                     |
| Treponema pallidum         | VBITrePal10923_0643  | Undecaprenyl pyrophosphate synthetase EC 2.5.1.31                                                                    |
| Treponema pallidum         | VBITrePal57110_0642  | Undecaprenyl pyrophosphate synthetase EC 2.5.1.31                                                                    |
| Treponema pallidum         | VBITrePal57110_0564  | V-type ATP synthase subunit A EC 3.6.3.14                                                                            |
| Treponema pallidum         | VBITrePal10923_0457  | V-type ATP synthase subunit A EC 3.6.3.14                                                                            |
| Treponema pallidum         | VBITrePal57110_0453  | V-type ATP synthase subunit A EC 3.6.3.14                                                                            |
| Treponema pallidum         | VBITrePal10923_0567  | V-type ATP synthase subunit A EC 3.6.3.14                                                                            |
| Treponema pallidum         | VBITrePal10923_0458  | V-type ATP synthase subunit B EC 3.6.3.14                                                                            |
| Treponema pallidum         | VBITrePal57110_0454  | V-type ATP synthase subunit B EC 3.6.3.14                                                                            |
| Treponema pallidum         | VBITrePal10923_0566  | V-type ATP synthase subunit B EC 3.6.3.14                                                                            |
| Treponema pallidum         | VBITrePal57110_0563  | V-type ATP synthase subunit B EC 3.6.3.14                                                                            |
| Treponema pallidum         | VBITrePal57110_0178  | Zinc ABC transporter 2C periplasmic-binding protein ZnuA 3B Manganese ABC transporter 2C periplasmic-binding protein |
| Treponema vincentii        | VBITreVin125179_0171 | 2-amino-3-ketobutyrate coenzyme A ligase EC 2.3.1.29                                                                 |
| Treponema vincentii        | VBITreVin125179_2382 | 3-oxoacyl-ACP reductase EC 1.1.1.100                                                                                 |
| Treponema vincentii        | VBITreVin125179_0905 | 3-oxoacyl-acyl-carrier protein reductase EC 1.1.1.100                                                                |
| Treponema vincentii        | VBITreVin125179_0906 | 3-oxoacyl-acyl-carrier-protein synthase 2C KASII EC 2.3.1.41                                                         |
| Treponema vincentii        | VBITreVin125179_0079 | ABC transporter 2C ATP-binding permease protein                                                                      |
| Treponema vincentii        | VBITreVin125179_0080 | ABC transporter 2C ATP-binding permease protein                                                                      |
| Treponema vincentii        | VBITreVin125179_0267 | ABC transporter 2C ATP-binding permease protein                                                                      |
| Treponema vincentii        | VBITreVin125179_0268 | ABC transporter 2C ATP-binding permease protein                                                                      |
| Treponema vincentii        | VBITreVin125179_0533 | ABC transporter 2C ATP-binding permease protein                                                                      |
| Treponema vincentii        | VBITreVin125179_2167 | ABC transporter 2C ATP-binding permease protein 2C putative                                                          |

Table S8

|                     |                      |                                                                                                                      |
|---------------------|----------------------|----------------------------------------------------------------------------------------------------------------------|
| Treponema vincentii | VBITreVin125179_1820 | Alkyl hydroperoxide reductase protein C EC 1.6.4.-                                                                   |
| Treponema vincentii | VBITreVin125179_0035 | capsular polysaccharide biosynthesis protein                                                                         |
| Treponema vincentii | VBITreVin125179_0691 | Cell division transporter 2C ATP-binding protein FtsE TC 3.A.5.1.1                                                   |
| Treponema vincentii | VBITreVin125179_0661 | Chemotaxis regulator - transmits chemoreceptor signals to flagellar motor components CheY                            |
| Treponema vincentii | VBITreVin125179_1752 | Chemotaxis regulator - transmits chemoreceptor signals to flagellar motor components CheY                            |
| Treponema vincentii | VBITreVin125179_1662 | Chemotaxis response regulator protein-glutamate methyltransferase CheB EC 3.1.1.61                                   |
| Treponema vincentii | VBITreVin125179_0108 | Cholinephosphate cytidyltransferase EC 2.7.7.15 Choline kinase EC 2.7.1.32                                           |
| Treponema vincentii | VBITreVin125179_1278 | ClpB protein                                                                                                         |
| Treponema vincentii | VBITreVin125179_1617 | ClpB protein                                                                                                         |
| Treponema vincentii | VBITreVin125179_0607 | COG1272 Predicted membrane protein hemolysin III homolog                                                             |
| Treponema vincentii | VBITreVin125179_0552 | D-glycero-D-manno-heptose 1 2C7-bisphosphate phosphatase EC 3.1.1.-                                                  |
| Treponema vincentii | VBITreVin125179_0546 | dTDP-4-dehydrorhamnose 3 2C5-epimerase EC 5.1.3.13                                                                   |
| Treponema vincentii | VBITreVin125179_0545 | dTDP-4-dehydrorhamnose reductase EC 1.1.1.133                                                                        |
| Treponema vincentii | VBITreVin125179_0544 | dTDP-glucose 4 2C6-dehydratase EC 4.2.1.46                                                                           |
| Treponema vincentii | VBITreVin125179_0428 | Duplicated ATPase component BL0693 of energizing module of predicted ECF transporter                                 |
| Treponema vincentii | VBITreVin125179_0396 | Enolase EC 4.2.1.11                                                                                                  |
| Treponema vincentii | VBITreVin125179_1676 | Fibronectin fibrinogen-binding protein                                                                               |
| Treponema vincentii | VBITreVin125179_0637 | FIG01187002 hypothetical protein                                                                                     |
| Treponema vincentii | VBITreVin125179_2381 | FIG138576 3-oxoacyl-ACP synthase EC 2.3.1.41                                                                         |
| Treponema vincentii | VBITreVin125179_0727 | FKBP-type peptidyl-prolyl cis-trans isomerase FkpA precursor EC 5.2.1.8                                              |
| Treponema vincentii | VBITreVin125179_1724 | Flagellar basal-body rod protein FlgC                                                                                |
| Treponema vincentii | VBITreVin125179_1431 | Flagellar basal-body rod protein FlgG                                                                                |
| Treponema vincentii | VBITreVin125179_1457 | Flagellar biosynthesis protein FlhB                                                                                  |
| Treponema vincentii | VBITreVin125179_1460 | Flagellar biosynthesis protein FlhP                                                                                  |
| Treponema vincentii | VBITreVin125179_1468 | Flagellar hook protein FlgE                                                                                          |
| Treponema vincentii | VBITreVin125179_1466 | Flagellar motor rotation protein MotA                                                                                |
| Treponema vincentii | VBITreVin125179_1721 | Flagellar motor switch protein FlhG                                                                                  |
| Treponema vincentii | VBITreVin125179_1454 | Flagellar synthesis regulator FlhN                                                                                   |
| Treponema vincentii | VBITreVin125179_1346 | Gamma-glutamyltranspeptidase PgsD CapD EC 2.3.2.2 2C catalyses PGA anchorage to peptidoglycan                        |
| Treponema vincentii | VBITreVin125179_1345 | Gamma-glutamyltranspeptidase PgsD CapD EC 2.3.2.2 2C catalyses PGA anchorage to peptidoglycan                        |
| Treponema vincentii | VBITreVin125179_0547 | Glucose-1-phosphate thymidyltransferase EC 2.7.7.24                                                                  |
| Treponema vincentii | VBITreVin125179_0548 | Glucose-1-phosphate thymidyltransferase EC 2.7.7.24                                                                  |
| Treponema vincentii | VBITreVin125179_0235 | Hemin ABC transporter 2C permease protein                                                                            |
| Treponema vincentii | VBITreVin125179_1047 | HtrA protease chaperone protein                                                                                      |
| Treponema vincentii | VBITreVin125179_0785 | hypothetical protein                                                                                                 |
| Treponema vincentii | VBITreVin125179_0442 | hypothetical protein                                                                                                 |
| Treponema vincentii | VBITreVin125179_0127 | Lipid A export ATP-binding permease protein MsbA                                                                     |
| Treponema vincentii | VBITreVin125179_1794 | Lipopolysaccharide ABC transporter 2C ATP-binding protein LptB                                                       |
| Treponema vincentii | VBITreVin125179_2154 | Magnesium and cobalt efflux protein CorC                                                                             |
| Treponema vincentii | VBITreVin125179_0904 | Malonyl CoA-acyl carrier protein transacylase EC 2.3.1.39                                                            |
| Treponema vincentii | VBITreVin125179_2217 | Maltose maltodextrin transport ATP-binding protein MalK EC 3.6.3.19 3B Multiple sugar ABC transporter 2C ATP-binding |
| Treponema vincentii | VBITreVin125179_0866 | Methionine ABC transporter ATP-binding protein                                                                       |
| Treponema vincentii | VBITreVin125179_0505 | methyl-accepting chemotaxis protein                                                                                  |
| Treponema vincentii | VBITreVin125179_0401 | Molybdenum transport ATP-binding protein ModC TC 3.A.1.8.1                                                           |
| Treponema vincentii | VBITreVin125179_1178 | NAD-dependent glyceraldehyde-3-phosphate dehydrogenase EC 1.2.1.12                                                   |
| Treponema vincentii | VBITreVin125179_0624 | Oligopeptide ABC transporter 2C periplasmic oligopeptide-binding protein OppA TC 3.A.1.5.1                           |
| Treponema vincentii | VBITreVin125179_1924 | Oligopeptide ABC transporter 2C periplasmic oligopeptide-binding protein OppA TC 3.A.1.5.1                           |
| Treponema vincentii | VBITreVin125179_1838 | Oligopeptide transport ATP-binding protein OppD TC 3.A.1.5.1                                                         |
| Treponema vincentii | VBITreVin125179_1927 | Oligopeptide transport ATP-binding protein OppD TC 3.A.1.5.1                                                         |
| Treponema vincentii | VBITreVin125179_1839 | Oligopeptide transport ATP-binding protein OppF TC 3.A.1.5.1                                                         |
| Treponema vincentii | VBITreVin125179_1928 | Oligopeptide transport ATP-binding protein OppF TC 3.A.1.5.1                                                         |
| Treponema vincentii | VBITreVin125179_2190 | Ornithine carbamoyltransferase EC 2.1.3.3                                                                            |
| Treponema vincentii | VBITreVin125179_1416 | Outer membrane protein assembly factor YaeT precursor                                                                |
| Treponema vincentii | VBITreVin125179_0763 | Phosphoenolpyruvate phosphomutase EC 5.4.2.9                                                                         |
| Treponema vincentii | VBITreVin125179_2037 | Phosphoglucosyltransferase EC 5.4.2.2                                                                                |
| Treponema vincentii | VBITreVin125179_2233 | Phosphonate ABC transporter ATP-binding protein TC 3.A.1.9.1                                                         |
| Treponema vincentii | VBITreVin125179_0762 | Phosphonopyruvate decarboxylase EC 4.1.1.82                                                                          |
| Treponema vincentii | VBITreVin125179_1338 | Poly-gamma-glutamate synthase subunit PgsB CapB EC 6.3.2.-                                                           |
| Treponema vincentii | VBITreVin125179_2221 | Putative ABC transporter ATP-binding protein 2C spy1790 homolog                                                      |
| Treponema vincentii | VBITreVin125179_0868 | Putative coproporphyrinogen III oxidase of BS HemN-type 2C oxygen-independent EC 1.3.99.22 2C in heat shock gene c   |
| Treponema vincentii | VBITreVin125179_0097 | Putrescine transport ATP-binding protein PotA TC 3.A.1.11.1                                                          |
| Treponema vincentii | VBITreVin125179_1751 | Response regulator of zinc sigma-54-dependent two-component system                                                   |
| Treponema vincentii | VBITreVin125179_1632 | RNA polymerase sigma factor RpoD                                                                                     |
| Treponema vincentii | VBITreVin125179_1185 | RNA polymerase sigma factor RpoD                                                                                     |
| Treponema vincentii | VBITreVin125179_1932 | RNA polymerase sigma factor RpoE                                                                                     |
| Treponema vincentii | VBITreVin125179_0024 | Selenocysteine-specific translation elongation factor                                                                |
| Treponema vincentii | VBITreVin125179_0711 | Sigma-54 dependent transcriptional regulator                                                                         |
| Treponema vincentii | VBITreVin125179_0653 | Sigma-54-dependent transcriptional activator                                                                         |
| Treponema vincentii | VBITreVin125179_0009 | Signal transduction histidine kinase CheA EC 2.7.3.-                                                                 |
| Treponema vincentii | VBITreVin125179_1675 | thiamine ABC transporter 2C ATP-binding protein                                                                      |
| Treponema vincentii | VBITreVin125179_1895 | Transport ATP-binding protein CydC                                                                                   |
| Treponema vincentii | VBITreVin125179_1647 | Transport ATP-binding protein CydC                                                                                   |
| Treponema vincentii | VBITreVin125179_0427 | Transport ATP-binding protein CydC                                                                                   |
| Treponema vincentii | VBITreVin125179_1494 | Transport ATP-binding protein CydD                                                                                   |
| Treponema vincentii | VBITreVin125179_1894 | Transport ATP-binding protein CydD                                                                                   |
| Treponema vincentii | VBITreVin125179_1649 | Transport ATP-binding protein CydD                                                                                   |
| Treponema vincentii | VBITreVin125179_1030 | transporter                                                                                                          |
| Treponema vincentii | VBITreVin125179_0033 | UDP-4-amino-4-deoxy-L-arabinose--oxoglutarate aminotransferase EC 2.6.1.-                                            |
| Treponema vincentii | VBITreVin125179_0932 | UDP-glucose 4-epimerase EC 5.1.3.2                                                                                   |

Table S8

|                      |                      |                                                                                                            |
|----------------------|----------------------|------------------------------------------------------------------------------------------------------------|
| Treponema vincentii  | VBITreVin125179_0551 | UDP-glucose 4-epimerase EC 5.1.3.2                                                                         |
| Treponema vincentii  | VBITreVin125179_1681 | UDP-N-acetylenolpyruvoylglucosamine reductase EC 1.1.1.158                                                 |
| Treponema vincentii  | VBITreVin125179_1733 | Undecaprenyl-phosphate N-acetylglucosaminyl 1-phosphate transferase EC 2.7.8.-                             |
| Treponema vincentii  | VBITreVin125179_0382 | V-type ATP synthase subunit A EC 3.6.3.14                                                                  |
| Treponema vincentii  | VBITreVin125179_0383 | V-type ATP synthase subunit B EC 3.6.3.14                                                                  |
| Treponema vincentii  | VBITreVin125179_0844 | Zinc ABC transporter 2C ATP-binding protein ZnuC                                                           |
| Treponema vincentii  | VBITreVin125179_0908 | Zinc ABC transporter 2C periplasmic-binding protein ZnuA                                                   |
| Turicella otitidis   | VBITurOti172114_1535 | Glucose-1-phosphate thymidyltransferase EC 2.7.7.24                                                        |
| Turicella otitidis   | VBITurOti172114_1148 | Heme ABC transporter 2C permease protein HmuU                                                              |
| Turicella otitidis   | VBITurOti172114_1552 | Porphobilinogen deaminase EC 2.5.1.61                                                                      |
| Variovorax paradoxus | VBIVarPar36677_2911  | 3-oxoacyl-acyl-carrier protein reductase EC 1.1.1.100                                                      |
| Variovorax paradoxus | VBIVarPar156291_4321 | Ferric iron ABC transporter 2C iron-binding protein iron-chelator utilization protein                      |
| Variovorax paradoxus | VBIVarPar36677_3600  | Two-component system response regulator QseB                                                               |
| Variovorax paradoxus | VBIVarPar36677_4989  | 3-deoxy-D-manno-octulosonic-acid transferase EC 2.-.-.-                                                    |
| Veillonella atypica  | VBIVeiAty166341_0618 | Acyl carrier protein                                                                                       |
| Veillonella atypica  | VBIVeiAty168093_1222 | Beta 1 2C4 glucosyltransferase                                                                             |
| Veillonella atypica  | VBIVeiAty168093_0396 | FeIII dicitrate ABC transporter 2C ATP-binding protein                                                     |
| Veillonella atypica  | VBIVeiAty168093_1595 | Ferrous iron transport protein B                                                                           |
| Veillonella atypica  | VBIVeiAty166341_0799 | FIG01197229 hypothetical protein                                                                           |
| Veillonella atypica  | VBIVeiAty168093_1325 | GTP pyrophosphokinase EC 2.7.6.5 2C pppGpp synthetase I                                                    |
| Veillonella atypica  | VBIVeiAty168093_1030 | Iron (III) dicitrate transport system permease protein FecD TC 3.A.1.14.1                                  |
| Veillonella atypica  | VBIVeiAty168093_1596 | Nitrate nitrite transporter                                                                                |
| Veillonella atypica  | VBIVeiAty168093_1583 | RNA binding methyltransferase FtsJ like                                                                    |
| Veillonella atypica  | VBIVeiAty168093_0468 | Translation elongation factor Tu                                                                           |
| Veillonella atypica  | VBIVeiAty168093_1735 | 3-oxoacyl-acyl-carrier protein reductase EC 1.1.1.100                                                      |
| Veillonella dispar   | VBIVeiDis1254_0387   | alpha 1 2C2 N-acetylglucosamine transferase                                                                |
| Veillonella dispar   | VBIVeiDis1254_0515   | Beta-1 2C3-glucosyltransferase                                                                             |
| Veillonella dispar   | VBIVeiDis1254_0505   | Dipeptide transport ATP-binding protein dppD                                                               |
| Veillonella dispar   | VBIVeiDis1254_1510   | Translation elongation factor Tu                                                                           |
| Veillonella dispar   | VBIVeiDis1254_0909   | UDP-galactopyranose mutase EC 5.4.99.9                                                                     |
| Veillonella dispar   | VBIVeiDis1254_0511   | Undecaprenyl pyrophosphate synthetase EC 2.5.1.31                                                          |
| Veillonella dispar   | VBIVeiDis1254_0242   | 3-deoxy-D-manno-octulosonic-acid transferase EC 2.-.-.-                                                    |
| Veillonella parvula  | VBIVeiPar156829_1292 | 3-oxoacyl-acyl-carrier-protein synthase 2C KASII EC 2.3.1.41                                               |
| Veillonella parvula  | VBIVeiPar156829_0309 | 3R-hydroxymyristoyl-acyl carrier protein dehydratase EC 4.2.1.-                                            |
| Veillonella parvula  | VBIVeiPar164583_1680 | ABC transporter membrane-spanning permease - glutamine transport                                           |
| Veillonella parvula  | VBIVeiPar164583_0799 | ABC transporter multidrug efflux pump 2C fused ATP-binding domains                                         |
| Veillonella parvula  | VBIVeiPar156829_1893 | ABC transporter multidrug efflux pump 2C fused ATP-binding domains                                         |
| Veillonella parvula  | VBIVeiPar164583_0737 | Acetylmethionine aminotransferase EC 2.6.1.11                                                              |
| Veillonella parvula  | VBIVeiPar156829_1835 | Acyl-acyl-carrier-protein--UDP-N- acetylglucosamine O-acyltransferase EC 2.3.1.129                         |
| Veillonella parvula  | VBIVeiPar80537_0522  | Adenosylmethionine-8-amino-7-oxononanoate aminotransferase EC 2.6.1.62                                     |
| Veillonella parvula  | VBIVeiPar80537_0227  | Alkanesulfonates ABC transporter ATP-binding protein Sulfonate ABC transporter 2C ATP-binding subunit SsuB |
| Veillonella parvula  | VBIVeiPar164583_1373 | Anthranilate synthase 2C aminase component EC 4.1.3.27                                                     |
| Veillonella parvula  | VBIVeiPar80537_0154  | ATP synthase alpha chain EC 3.6.3.14                                                                       |
| Veillonella parvula  | VBIVeiPar156829_1091 | ATP synthase beta chain EC 3.6.3.14                                                                        |
| Veillonella parvula  | VBIVeiPar80537_1495  | Diaminopimelate decarboxylase EC 4.1.1.20                                                                  |
| Veillonella parvula  | VBIVeiPar156829_1555 | Diaminopimelate decarboxylase EC 4.1.1.20                                                                  |
| Veillonella parvula  | VBIVeiPar80537_1008  | Ferrichrome transport ATP-binding protein FhuC TC 3.A.1.14.3                                               |
| Veillonella parvula  | VBIVeiPar80537_1113  | Fibronectin fibrinogen-binding protein                                                                     |
| Veillonella parvula  | VBIVeiPar164583_0327 | FIG01197312 hypothetical protein                                                                           |
| Veillonella parvula  | VBIVeiPar156829_1420 | FIG01197312 hypothetical protein                                                                           |
| Veillonella parvula  | VBIVeiPar164583_0382 | FIG01197634 hypothetical protein                                                                           |
| Veillonella parvula  | VBIVeiPar80537_1319  | General secretion pathway protein E                                                                        |
| Veillonella parvula  | VBIVeiPar164583_0571 | Glutamate transport ATP-binding protein                                                                    |
| Veillonella parvula  | VBIVeiPar156829_0122 | Glutamate transport ATP-binding protein                                                                    |
| Veillonella parvula  | VBIVeiPar164583_0286 | Glutamate transport membrane-spanning protein                                                              |
| Veillonella parvula  | VBIVeiPar156829_0121 | Glutamate transport membrane-spanning protein                                                              |
| Veillonella parvula  | VBIVeiPar164583_0285 | Glutamate transport membrane-spanning protein                                                              |
| Veillonella parvula  | VBIVeiPar80537_0775  | Glutamate transport membrane-spanning protein                                                              |
| Veillonella parvula  | VBIVeiPar164583_0798 | Glutamine transport ATP-binding protein glnQ TC 3.A.1.3.2                                                  |
| Veillonella parvula  | VBIVeiPar156829_0799 | Glycerol-3-phosphate transporter                                                                           |
| Veillonella parvula  | VBIVeiPar164583_1279 | Glycerol-3-phosphate transporter                                                                           |
| Veillonella parvula  | VBIVeiPar164583_0535 | glycosyl transferase 2C family 2                                                                           |
| Veillonella parvula  | VBIVeiPar80537_1026  | glycosyl transferase 2C family 2                                                                           |
| Veillonella parvula  | VBIVeiPar156829_0881 | Hemin ABC transporter 2C permease protein                                                                  |
| Veillonella parvula  | VBIVeiPar164583_1367 | Hemin ABC transporter 2C permease protein                                                                  |
| Veillonella parvula  | VBIVeiPar156829_0657 | Imidazole glycerol phosphate synthase subunit EC 4.1.3.-                                                   |
| Veillonella parvula  | VBIVeiPar80537_0189  | Iron (III) dicitrate transport system permease protein FecD TC 3.A.1.14.1                                  |
| Veillonella parvula  | VBIVeiPar164583_1122 | isochorismate synthase                                                                                     |
| Veillonella parvula  | VBIVeiPar164583_1288 | Lactaldehyde reductase EC 1.1.1.77                                                                         |
| Veillonella parvula  | VBIVeiPar156829_0532 | Lipid A export ATP-binding permease protein MsbA                                                           |
| Veillonella parvula  | VBIVeiPar156829_0531 | Lipid A export ATP-binding permease protein MsbA                                                           |
| Veillonella parvula  | VBIVeiPar80537_0525  | Lipid A export ATP-binding permease protein MsbA EC 3.6.3.25                                               |
| Veillonella parvula  | VBIVeiPar80537_0194  | Manganese ABC transporter 2C periplasmic-binding protein SitA                                              |
| Veillonella parvula  | VBIVeiPar156829_0851 | Manganese superoxide dismutase EC 1.15.1.1                                                                 |
| Veillonella parvula  | VBIVeiPar80537_1683  | Manganese superoxide dismutase EC 1.15.1.1                                                                 |
| Veillonella parvula  | VBIVeiPar156829_0376 | Methionine ABC transporter ATP-binding protein                                                             |
| Veillonella parvula  | VBIVeiPar80537_0610  | Methionine biosynthesis and transport regulator MtaR 2C LysR family                                        |
| Veillonella parvula  | VBIVeiPar164583_0538 | N-acetylmannosaminyltransferase EC 2.4.1.187                                                               |
| Veillonella parvula  | VBIVeiPar80537_1029  | N-acetylmannosaminyltransferase EC 2.4.1.187                                                               |

Table S8

|                                |                      |                                                                                            |
|--------------------------------|----------------------|--------------------------------------------------------------------------------------------|
| Veillonella parvula            | VBIVeiPar164583_1725 | Oligopeptide ABC transporter 2C periplasmic oligopeptide-binding protein OppA TC 3.A.1.5.1 |
| Veillonella parvula            | VBIVeiPar80537_0476  | Oligopeptide ABC transporter 2C periplasmic oligopeptide-binding protein OppA TC 3.A.1.5.1 |
| Veillonella parvula            | VBIVeiPar156829_1066 | Oligopeptide transport ATP-binding protein OppF TC 3.A.1.5.1                               |
| Veillonella parvula            | VBIVeiPar156829_0498 | Phosphoglucosamine mutase EC 5.4.2.10                                                      |
| Veillonella parvula            | VBIVeiPar164583_0807 | Phosphoglucosamine mutase EC 5.4.2.10                                                      |
| Veillonella parvula            | VBIVeiPar164583_0071 | Porphobilinogen deaminase EC 2.5.1.61                                                      |
| Veillonella parvula            | VBIVeiPar80537_1387  | Porphobilinogen synthase EC 4.2.1.24                                                       |
| Veillonella parvula            | VBIVeiPar156829_1490 | Prolipoprotein diacylglyceryl transferase EC 2.4.99.-                                      |
| Veillonella parvula            | VBIVeiPar164583_0454 | Prolipoprotein diacylglyceryl transferase EC 2.4.99.-                                      |
| Veillonella parvula            | VBIVeiPar80537_1393  | Pyrroline-5-carboxylate reductase EC 1.5.1.2                                               |
| Veillonella parvula            | VBIVeiPar80537_0215  | Respiratory nitrate reductase beta chain EC 1.7.99.4                                       |
| Veillonella parvula            | VBIVeiPar156829_0868 | sensor histidine kinase                                                                    |
| Veillonella parvula            | VBIVeiPar164583_1513 | Serine protease 2C DegP HtrA 2C do-like EC 3.4.21.-                                        |
| Veillonella parvula            | VBIVeiPar80537_1657  | TonB-dependent receptor 3B Outer membrane receptor for ferrienterochelin and colicins      |
| Veillonella parvula            | VBIVeiPar156829_1111 | Translation elongation factor Tu                                                           |
| Veillonella parvula            | VBIVeiPar80537_1477  | Translation elongation factor Tu                                                           |
| Veillonella parvula            | VBIVeiPar80537_0467  | Transport ATP-binding protein CydD                                                         |
| Veillonella parvula            | VBIVeiPar156829_1233 | Transport ATP-binding protein CydD                                                         |
| Veillonella parvula            | VBIVeiPar164583_0570 | Twitching motility protein PilT                                                            |
| Veillonella parvula            | VBIVeiPar164583_0569 | type II secretion system protein F domain protein                                          |
| Veillonella parvula            | VBIVeiPar156829_1284 | UDP-3-O-3-hydroxymyristoyl glucosamine N-acyltransferase EC 2.3.1.-                        |
| Veillonella parvula            | VBIVeiPar156829_0266 | UDP-glucose 4-epimerase EC 5.1.3.2                                                         |
| Veillonella parvula            | VBIVeiPar164583_0160 | UDP-glucose 4-epimerase EC 5.1.3.2                                                         |
| Veillonella parvula            | VBIVeiPar80537_1503  | UDP-N-acetylglucosamine 2-epimerase EC 5.1.3.14                                            |
| Veillonella parvula            | VBIVeiPar164583_1194 | Undecaprenyl-phosphate galactosephosphotransferase EC 2.7.8.6                              |
| Veillonella parvula            | VBIVeiPar80537_1504  | Undecaprenyl-phosphate N-acetylglucosaminyl 1-phosphate transferase EC 2.7.8.-             |
| Veillonella parvula            | VBIVeiPar156829_0577 | Uroporphyrinogen III decarboxylase EC 4.1.1.37                                             |
| Veillonella parvula            | VBIVeiPar156829_0727 | Vitamin B12 ABC transporter 2C ATPase component BtuD                                       |
| Veillonella parvula            | VBIVeiPar156829_0728 | Vitamin B12 ABC transporter 2C permease component BtuC                                     |
| Veillonella parvula            | VBIVeiPar164583_1880 | YbbL ABC transporter ATP-binding protein                                                   |
| Veillonella sp. oral taxon 158 | VBIVeiSp174732_0068  | 3-oxoacyl-acyl-carrier protein reductase EC 1.1.1.100                                      |
| Veillonella sp. oral taxon 158 | VBIVeiSp174732_0833  | capsular polysaccharide biosynthesis proteinCps4H                                          |
| Veillonella sp. oral taxon 158 | VBIVeiSp174732_0659  | Ferrous iron transport protein B                                                           |
| Veillonella sp. oral taxon 158 | VBIVeiSp174732_0201  | Glycosyltransferase                                                                        |
| Veillonella sp. oral taxon 158 | VBIVeiSp174732_1291  | periplasmic binding protein                                                                |
| Veillonella sp. oral taxon 158 | VBIVeiSp174732_0535  | Translation elongation factor Tu                                                           |
| Veillonella sp. oral taxon 158 | VBIVeiSp174732_0536  | Translation elongation factor Tu                                                           |
| Veillonella sp. oral taxon 158 | VBIVeiSp174732_0951  | Vitamin B12 ABC transporter 2C permease component BtuC                                     |
| Veillonella sp. oral taxon 780 | VBIVeiSp176273_0554  | Cell division trigger factor EC 5.2.1.8                                                    |
| Veillonella sp. oral taxon 780 | VBIVeiSp176273_0897  | CoA-acylating propionaldehyde dehydrogenase                                                |
| Veillonella sp. oral taxon 780 | VBIVeiSp176273_1187  | Respiratory nitrate reductase beta chain EC 1.7.99.4                                       |
