# Supplementary material
Source: PubMed Central journal article supplement (PMC4817619)
Supplement: ismej201423x11.pdf [file ismej201423x11.pdf]

Supplementary Table S9. Up-regulated genes in disease of the uncultured organism candidate division TM7. In red are genes that were identified as putative virulence factors or virulence factors related genes according to the VFDB database (see Material and Methods).

|                            |                                                                                                                                                      |
|----------------------------|------------------------------------------------------------------------------------------------------------------------------------------------------|
| VBICanDiv80122_0419        | 3'-to-5' oligoribonuclease (orn)                                                                                                                     |
| VBICanDiv80122_0183        | 4-alpha-glucanotransferase                                                                                                                           |
| <b>VBICanDiv80122_0370</b> | <b>ABC transporter ATP-binding protein</b>                                                                                                           |
| VBICanDiv80122_0359        | Adenylate kinase (EC 2.7.4.3)                                                                                                                        |
| VBICanDiv80122_0471        | Alanyl-tRNA synthetase (EC 6.1.1.7)                                                                                                                  |
| VBICanDiv33328_0087        | Alpha-amylase (EC 3.2.1.1)                                                                                                                           |
| VBICanDiv80122_0207        | Alpha-amylase (EC 3.2.1.1)                                                                                                                           |
| VBICanDiv80122_0279        | Arginine/ornithine antiporter ArcD                                                                                                                   |
| VBICanDiv80122_0459        | ATP-dependent DNA helicase UvrD/PcrA                                                                                                                 |
| VBICanDiv80122_0025        | ATPase AAA family                                                                                                                                    |
| <b>VBICanDiv80122_0262</b> | <b>Bacillosamine/Legionaminic acid biosynthesis aminotransferase PglE;<br/>4-keto-6-deoxy-N-Acetyl-D-hexosaminy-(Lipid carrier) aminotransferase</b> |
| VBICanDiv80122_0286        | Cell division protein FtsA                                                                                                                           |
| VBICanDiv80122_0378        | Cell division protein FtsH (EC 3.4.24.-)                                                                                                             |
| VBICanDiv80122_0460        | Cell wall-binding protein                                                                                                                            |
| VBICanDiv80122_0162        | Chaperone protein DnaJ                                                                                                                               |
| VBICanDiv80122_0016        | Chitinase (EC 3.2.1.14)                                                                                                                              |
| VBICanDiv80122_0078        | Chromosomal replication initiator protein DnaA                                                                                                       |
| VBICanDiv80122_0317        | conserved hypothetical protein                                                                                                                       |
| VBICanDiv80122_0417        | CTP synthase (EC 6.3.4.2)                                                                                                                            |
| VBICanDiv80122_0467        | Cysteine desulfurase (EC 2.8.1.7)                                                                                                                    |
| VBICanDiv80122_0173        | dCTP deaminase( EC:3.5.4.13 )                                                                                                                        |
| VBICanDiv33328_0051        | dihydrolipoamide dehydrogenase( EC:1.8.1.4 )                                                                                                         |
| VBICanDiv80122_0046        | Dihydroorotate dehydrogenase (EC 1.3.3.1)                                                                                                            |
| VBICanDiv80122_0002        | DNA gyrase subunit A (EC 5.99.1.3)                                                                                                                   |
| VBICanDiv80122_0168        | DNA polymerase III subunits gamma and tau (EC 2.7.7.7)                                                                                               |
| VBICanDiv80122_0080        | DNA recombination and repair protein RecF                                                                                                            |
| VBICanDiv80122_0073        | DNA repair protein RadC                                                                                                                              |
| <b>VBICanDiv33328_0082</b> | <b>dTDP-4-dehydrorhamnose 3 5-epimerase (EC 5.1.3.13) / dTDP-4-dehydrorhamnose reductase (EC 1.1.1.133)</b>                                          |
| <b>VBICanDiv33328_0040</b> | <b>dTDP-glucose 4 6-dehydratase (EC 4.2.1.46)</b>                                                                                                    |
| <b>VBICanDiv80122_0134</b> | <b>dTDP-glucose 4 6-dehydratase (EC 4.2.1.46)</b>                                                                                                    |
| VBICanDiv80122_0031        | Excinuclease ABC subunit C                                                                                                                           |
| VBICanDiv80122_0434        | FIG002344: Hydrolase (HAD superfamily)                                                                                                               |
| VBICanDiv80122_0115        | FIG00473119: hypothetical protein                                                                                                                    |
| VBICanDiv80122_0331        | Fructose-bisphosphate aldolase class II (EC 4.1.2.13)                                                                                                |
| VBICanDiv80122_0401        | Glucose-6-phosphate isomerase archaeal II (EC 5.3.1.9) / Mannose-6-phosphate isomerase archaeal (EC 5.3.1.8)                                         |
| VBICanDiv80122_0300        | Glutamyl-tRNA synthetase (EC 6.1.1.17) @ Glutamyl-tRNA(Gln) synthetase (EC 6.1.1.24)                                                                 |
| VBICanDiv80122_0320        | glycosyl transferase family 2                                                                                                                        |

Supplementary Table S9. Up-regulated genes in disease of the uncultured organism candidate division TM7. In red are genes that were identified as putative virulence factors or virulence factors related genes according to the VFDB database (see Material and Methods).

|                            |                                                     |
|----------------------------|-----------------------------------------------------|
| VBICanDiv80122_0316        | glycosyl transferase group 2 family protein         |
| VBICanDiv80122_0291        | GTP-binding protein EngA                            |
| <b>VBICanDiv80122_0399</b> | <b>Heat shock protein 60 family chaperone GroEL</b> |
| VBICanDiv80122_0398        | Heat shock protein 60 family co-chaperone GroES     |
| VBICanDiv80122_0101        | heat shock protein Hsp20                            |
| VBICanDiv80122_0388        | Heat-inducible transcription repressor HrcA         |
| <b>VBICanDiv80122_0315</b> | <b>hemagglutinin-related protein</b>                |
| VBICanDiv33328_0114        | hypothetical protein                                |
| VBICanDiv33328_0072        | hypothetical protein                                |
| VBICanDiv80122_0084        | hypothetical protein                                |
| VBICanDiv80122_0088        | hypothetical protein                                |
| VBICanDiv33328_0128        | hypothetical protein                                |
| VBICanDiv80122_0093        | hypothetical protein                                |
| VBICanDiv80122_0234        | hypothetical protein                                |
| VBICanDiv80122_0372        | hypothetical protein                                |
| VBICanDiv33328_0024        | hypothetical protein                                |
| VBICanDiv80122_0137        | hypothetical protein                                |
| VBICanDiv80122_0441        | hypothetical protein                                |
| VBICanDiv80122_0094        | hypothetical protein                                |
| VBICanDiv80122_0022        | hypothetical protein                                |
| VBICanDiv80122_0461        | hypothetical protein                                |
| VBICanDiv80122_0442        | hypothetical protein                                |
| VBICanDiv80122_0092        | hypothetical protein                                |
| VBICanDiv80122_0104        | hypothetical protein                                |
| VBICanDiv80122_0096        | hypothetical protein                                |
| VBICanDiv80122_0347        | hypothetical protein                                |
| VBICanDiv80122_0373        | hypothetical protein                                |
| VBICanDiv80122_0276        | hypothetical protein                                |
| VBICanDiv80122_0083        | hypothetical protein                                |
| VBICanDiv80122_0427        | hypothetical protein                                |
| VBICanDiv80122_0033        | hypothetical protein                                |
| VBICanDiv80122_0443        | hypothetical protein                                |
| VBICanDiv33328_0116        | hypothetical protein                                |
| <b>VBICanDiv80122_0288</b> | <b>hypothetical protein</b>                         |
| VBICanDiv80122_0098        | hypothetical protein                                |
| VBICanDiv33328_0014        | hypothetical protein                                |
| VBICanDiv80122_0225        | hypothetical protein                                |
| VBICanDiv80122_0263        | hypothetical protein                                |

Supplementary Table S9. Up-regulated genes in disease of the uncultured organism candidate division TM7. In red are genes that were identified as putative virulence factors or virulence factors related genes according to the VFDB database (see Material and Methods).

|                     |                                                                                                                     |
|---------------------|---------------------------------------------------------------------------------------------------------------------|
| VBICanDiv80122_0097 | hypothetical protein                                                                                                |
| VBICanDiv33328_0043 | hypothetical protein                                                                                                |
| VBICanDiv80122_0181 | hypothetical protein                                                                                                |
| VBICanDiv80122_0243 | hypothetical protein                                                                                                |
| VBICanDiv80122_0034 | hypothetical protein                                                                                                |
| VBICanDiv80122_0030 | hypothetical protein                                                                                                |
| VBICanDiv80122_0241 | hypothetical protein                                                                                                |
| VBICanDiv80122_0274 | hypothetical protein                                                                                                |
| VBICanDiv33328_0127 | hypothetical protein                                                                                                |
| VBICanDiv80122_0246 | hypothetical protein                                                                                                |
| VBICanDiv80122_0091 | hypothetical protein                                                                                                |
| VBICanDiv80122_0128 | hypothetical protein                                                                                                |
| VBICanDiv80122_0447 | hypothetical protein                                                                                                |
| VBICanDiv80122_0100 | hypothetical protein                                                                                                |
| VBICanDiv80122_0275 | hypothetical protein                                                                                                |
| VBICanDiv80122_0268 | hypothetical protein                                                                                                |
| VBICanDiv33328_0012 | hypothetical protein                                                                                                |
| VBICanDiv80122_0449 | hypothetical protein                                                                                                |
| VBICanDiv80122_0379 | integral membrane protein MviN                                                                                      |
| VBICanDiv80122_0267 | Isoleucyl-tRNA synthetase (EC 6.1.1.5)                                                                              |
| VBICanDiv80122_0453 | Large exoproteins involved in heme utilization or adhesion                                                          |
| VBICanDiv80122_0418 | Large-conductance mechanosensitive channel                                                                          |
| VBICanDiv80122_0048 | LemA protein                                                                                                        |
| VBICanDiv80122_0171 | LSU ribosomal protein L10p (P0)                                                                                     |
| VBICanDiv80122_0301 | LSU ribosomal protein L13p (L13Ae)                                                                                  |
| VBICanDiv80122_0339 | LSU ribosomal protein L15p (L27Ae)                                                                                  |
| VBICanDiv80122_0127 | LSU ribosomal protein L15p (L27Ae)                                                                                  |
| VBICanDiv80122_0341 | LSU ribosomal protein L18p (L5e)                                                                                    |
| VBICanDiv80122_0174 | LSU ribosomal protein L1p (L10Ae)                                                                                   |
| VBICanDiv80122_0170 | LSU ribosomal protein L7/L12 (P1/P2)                                                                                |
| VBICanDiv80122_0141 | Lysyl aminopeptidase (EC 3.4.11.15)                                                                                 |
| VBICanDiv80122_0247 | membrane protein                                                                                                    |
| VBICanDiv80122_0369 | membrane protein putative                                                                                           |
| VBICanDiv80122_0024 | metallophosphoesterase                                                                                              |
| VBICanDiv80122_0463 | Methionyl-tRNA synthetase (EC 6.1.1.10)                                                                             |
| VBICanDiv80122_0454 | Methylenetetrahydrofolate dehydrogenase (NADP+) (EC 1.5.1.5) / Methenyltetrahydrofolate cyclohydrolase (EC 3.5.4.9) |
| VBICanDiv33328_0021 | NAD-specific glutamate dehydrogenase (EC 1.4.1.2)                                                                   |
| VBICanDiv33328_0020 | NAD-specific glutamate dehydrogenase (EC 1.4.1.2)                                                                   |

Supplementary Table S9. Up-regulated genes in disease of the uncultured organism candidate division TM7. In red are genes that were identified as putative virulence factors or virulence factors related genes according to the VFDB database (see Material and Methods).

|                     |                                                                                           |
|---------------------|-------------------------------------------------------------------------------------------|
| VBICanDiv80122_0319 | O-antigen export system permease protein RfbD                                             |
| VBICanDiv80122_0029 | Oligopeptide ABC transporter periplasmic oligopeptide-binding protein OppA (TC 3.A.1.5.1) |
| VBICanDiv80122_0280 | Ornithine carbamoyltransferase (EC 2.1.3.3)                                               |
| VBICanDiv80122_0065 | Oxidoreductase N-terminal:Oxidoreductase C-terminal                                       |
| VBICanDiv33328_0011 | Peptidoglycan N-acetylglucosamine deacetylase (EC 3.5.1.-)                                |
| VBICanDiv80122_0456 | Phosphoglycerate kinase (EC 2.7.2.3)                                                      |
| VBICanDiv80122_0270 | Probable phage protein                                                                    |
| VBICanDiv80122_0438 | proposed amino acid ligase found clustered with an amidotransferase                       |
| VBICanDiv80122_0189 | protein of unknown function UPF0118                                                       |
| VBICanDiv80122_0089 | putative peptidase family M23/M37 protein                                                 |
| VBICanDiv80122_0244 | Putative ROK-family transcriptional regulator                                             |
| VBICanDiv80122_0455 | Pyruvate kinase (EC 2.7.1.40)                                                             |
| VBICanDiv80122_0167 | Replicative DNA helicase (EC 3.6.1.-) [SA14-24]                                           |
| VBICanDiv80122_0355 | Ribonucleotide reductase transcriptional regulator NrdR                                   |
| VBICanDiv80122_0290 | Ribosomal large subunit pseudouridine synthase B (EC 5.4.99.-)                            |
| VBICanDiv80122_0448 | Serine hydroxymethyltransferase (EC 2.1.2.1)                                              |
| VBICanDiv80122_0294 | similar to carbon monoxide dehydrogenase nickel insertion protein                         |
| VBICanDiv80122_0069 | Single-stranded DNA-binding protein                                                       |
| VBICanDiv80122_0415 | SSU ribosomal protein S11p (S14e)                                                         |
| VBICanDiv80122_0309 | SSU ribosomal protein S14p (S29e)                                                         |
| VBICanDiv80122_0242 | SSU ribosomal protein S1p                                                                 |
| VBICanDiv80122_0308 | SSU ribosomal protein S8p (S15Ae)                                                         |
| VBICanDiv33328_0027 | Succinyl-CoA ligase [ADP-forming] alpha chain (EC 6.2.1.5)                                |
| VBICanDiv80122_0322 | Succinyl-CoA ligase [ADP-forming] alpha chain (EC 6.2.1.5)                                |
| VBICanDiv80122_0470 | Sulfate permease                                                                          |
| VBICanDiv80122_0318 | Teichoic acid export ATP-binding protein TagH (EC 3.6.3.40)                               |
| VBICanDiv80122_0227 | Thymidylate synthase (EC 2.1.1.45)                                                        |
| VBICanDiv80122_0332 | Transketolase C-terminal section (EC 2.2.1.1)                                             |
| VBICanDiv80122_0386 | Translation elongation factor LepA                                                        |
| VBICanDiv80122_0445 | Trehalose-6-phosphate hydrolase (EC 3.2.1.93)                                             |
| VBICanDiv80122_0457 | Triosephosphate isomerase (EC 5.3.1.1)                                                    |
| VBICanDiv80122_0371 | tRNA-guanine transglycosylase (EC 2.4.2.29)                                               |
| VBICanDiv80122_0469 | tRNA-specific 2-thiouridylase MnmA                                                        |
| VBICanDiv80122_0289 | two-component response regulator                                                          |
| VBICanDiv80122_0179 | two-component sensor histidine kinase                                                     |
| VBICanDiv80122_0431 | Type IV fimbrial assembly ATPase PilB                                                     |
| VBICanDiv80122_0430 | Type IV fimbrial assembly protein PilC                                                    |
| VBICanDiv80122_0090 | type IV secretory pathway VirB4 components-like protein                                   |

Supplementary Table S9. Up-regulated genes in disease of the uncultured organism candidate division TM7. In red are genes that were identified as putative virulence factors or virulence factors related genes according to the VFDB database (see Material and Methods).

|                     |                                                              |
|---------------------|--------------------------------------------------------------|
| VBICanDiv80122_0352 | UDP-glucose 4-epimerase (EC 5.1.3.2)                         |
| VBICanDiv80122_0450 | UDP-N-acetylenolpyruvoylglucosamine reductase (EC 1.1.1.158) |
